# Supplementary material for: Evolutionary unique N-glycan-dependent protein quality control system plays pivotal roles in cellular fitness and extracellular vesicle transport in Cryptococcus neoformans
Source: eLife journal article supplement (doi:10.7554/elife.103729), 2024-12-02
Supplement: fig3-data1 [file elife-103729-fig3-data1-v1.zip]

## Sheet: 0
	Well	Fluor	Target	Content	Sample	Cq	SQ
	A01	SYBR	ACT1	Unkn	WT	22.6838																																		A01	SYBR	ACT1	Unkn	WT	23.2923
	A02	SYBR	ACT1	Unkn	TM	23.7872																																		A02	SYBR	ACT1	Unkn	DTT	24.4				Power1
	A03	SYBR	ACT1	Unkn	DTT	22.9612																																		A03	SYBR	ACT1	Unkn	TM	24.93				H99 (-)
	A04	SYBR	ACT1	Unkn	37	23.7184																																		A04	SYBR	ACT1	Unkn	37	24.6579				H99 DTT
	A05	SYBR	ACT1	Unkn	WT	22.5561																																		A05	SYBR	ACT1	Unkn	WT	23.204				H99 TM
	A06	SYBR	ACT1	Unkn	TM	23.7213																																		A06	SYBR	ACT1	Unkn	DTT	23.2406				H99 37℃
	A07	SYBR	ACT1	Unkn	DTT	23.103																																		A07	SYBR	ACT1	Unkn	TM	23.8889
	A08	SYBR	ACT1	Unkn	37	23.8565																																		A08	SYBR	ACT1	Unkn	37	24.708
	B01	SYBR	KAR2	Unkn	WT	19.0519																																		B01	SYBR	KAR2	Unkn	WT	22.2306		-1.06163		Power1
	B02	SYBR	KAR2	Unkn	TM	16.5024																																		B02	SYBR	KAR2	Unkn	DTT	20.7919		-3.60813		H99 (-)
	B03	SYBR	KAR2	Unkn	DTT	18.2389																																		B03	SYBR	KAR2	Unkn	TM	20.05		-4.88		H99 DTT
	B04	SYBR	KAR2	Unkn	37	17.7281																																		B04	SYBR	KAR2	Unkn	37	23.3115		-1.34642		H99 TM
	B05	SYBR	KAR2	Unkn	WT	19.0783																																		B05	SYBR	KAR2	Unkn	WT	20.4282		-2.77587		H99 37℃
	B06	SYBR	KAR2	Unkn	TM	16.4035																																		B06	SYBR	KAR2	Unkn	DTT	20.03		-3.21055
	B07	SYBR	KAR2	Unkn	DTT	18.2079																																		B07	SYBR	KAR2	Unkn	TM	20.2		-3.68889		AVERAGE
	B08	SYBR	KAR2	Unkn	37	17.6079																																		B08	SYBR	KAR2	Unkn	37	20.2778		-4.43022		(-)
	C01	SYBR	UGGT	Unkn	WT	23.7744			1.09061			Power1	UGG1	MNS1	MNS101	MNL1	MNL2																																DTT
	C02	SYBR	UGGT	Unkn	TM	24.1398			0.352591			H99 (-)	0.469563	0.024772	0.0634775	0.238127	0.266161																																TM
	C03	SYBR	UGGT	Unkn	DTT	22.8626			-0.0986518			H99 DTT	1.07077	0.797742	0.348894	5.6313	0.819249																																37℃
	C04	SYBR	UGGT	Unkn	37	24.1257			0.407262			H99 TM	0.783176	0.0350957	0.0502198	0.139817	0.350675
	C05	SYBR	UGGT	Unkn	WT	23.5693			1.01323			H99 37℃	0.754053	0.0294617	0.0209615	0.798469	0.480158
	C06	SYBR	UGGT	Unkn	TM	25.0322			1.3109
	C07	SYBR	UGGT	Unkn	DTT	23.4784			0.375404
	C08	SYBR	UGGT	Unkn	37	24.0773			0.220722			Power1	UGG1	MNS1	MNS101	MNL1	MNL2
	D01	SYBR	MNS1A	Unkn	WT	28.0189			5.33515			H99 (-)	0.495436	0.0200638	0.0322611	0.312038	0.26785
	D02	SYBR	MNS1A	Unkn	TM	28.6198			4.83256			H99 DTT	0.77089	0.11437	0.190913	0.00898359	0.457041
	D03	SYBR	MNS1A	Unkn	DTT	23.2872			0.326006			H99 TM	0.403069	0.0206908	0.0463938	0.0118823	0.355909
	D04	SYBR	MNS1A	Unkn	37	28.8034			5.08502			H99 37℃	0.858136	0.0191291	0.0998078	0.0125984	0.720529
	D05	SYBR	MNS1A	Unkn	WT	28.1954			5.63926
	D06	SYBR	MNS1A	Unkn	TM	29.3162			5.59486
	D07	SYBR	MNS1A	Unkn	DTT	26.2312			3.12822			Average	UGG1	MNS1	MNS101	MNL1	MNL2
	D08	SYBR	MNS1A	Unkn	37	29.5646			5.70808			(-)	0.4825	0.0224179	0.0478693	0.275082	0.267006
	E01	SYBR	MNS1B	Unkn	WT	26.6614			3.97761			DTT	0.920831	0.456056	0.269904	2.82014	0.638145
	E02	SYBR	MNS1B	Unkn	TM	28.1028			4.3156			TM	0.593122	0.0278933	0.0483068	0.0758499	0.353292
	E03	SYBR	MNS1B	Unkn	DTT	24.4804			1.51914			37℃	0.806094	0.0242954	0.0603846	0.405534	0.600344
	E04	SYBR	MNS1B	Unkn	37	29.2945			5.57612
	E05	SYBR	MNS1B	Unkn	WT	27.5102			4.95406
	E06	SYBR	MNS1B	Unkn	TM	28.1512			4.42992			Error	UGG1	MNS1	MNS101	MNL1	MNL2
	E07	SYBR	MNS1B	Unkn	DTT	25.492			2.38901			H99 (-)	0.0182954	0.00332922	0.0220733	0.0522628	0.00119427
	E08	SYBR	MNS1B	Unkn	37	27.1812			3.3247			H99 DTT	0.212049	0.483217	0.111709	3.97558	0.25612
	F01	SYBR	MNL1	Unkn	WT	25.7886			2.0702			H99 TM	0.268777	0.0101858	0.00270536	0.0904638	0.00370106
	F02	SYBR	MNL1	Unkn	TM	25.3945			2.83838			H99 37℃	0.0735978	0.0073062	0.0557528	0.555694	0.169968
	F03	SYBR	MNL1	Unkn	DTT	21.2278			-2.49347
	F04	SYBR	MNL1	Unkn	37	23.4277			0.324692
	F05	SYBR	MNL1	Unkn	WT	25.5367			1.68021			Error	UGG1	MNS1	MNS101	MNL1	MNL2
	F06	SYBR	MNL1	Unkn	TM	25.4469			6.39504			H99 (-)	0.0129368	0.00235412	0.0156082	0.0369554	0.000844478
	F07	SYBR	MNL1	Unkn	DTT	23.3009			6.79849			H99 DTT	0.149941	0.341686	0.0789905	2.81116	0.181104
	F08	SYBR	MNL1	Unkn	37	24.5495			6.31062			H99 TM	0.190054	0.00720244	0.00191298	0.0639675	0.00261704
	G01	SYBR	MNL2	Unkn	WT	24.5934			1.90963			H99 37℃	0.0520415	0.00516627	0.0394232	0.392935	0.120185
	G02	SYBR	MNL2	Unkn	TM	25.299			1.51179
	G03	SYBR	MNL2	Unkn	DTT	23.2489			0.287626
	G04	SYBR	MNL2	Unkn	37	24.7768			1.05842			UGG1/ACT1			MNS1/ACT1
	G05	SYBR	MNL2	Unkn	WT	24.4566			1.9005			(-)	1		(-)	1
	G06	SYBR	MNL2	Unkn	TM	25.2117			1.49042			DTT	1.90846		DTT	20.3434
	G07	SYBR	MNL2	Unkn	DTT	24.2326			1.1296			TM	1.22927		TM	1.24424
	G08	SYBR	MNL2	Unkn	37	24.3294			0.472872			37℃	1.67066		37℃	1.08375
												MNS101B/ACT1			MNL1/ACT1			MNL2/ACT1
												(-)	1		(-)	1		(-)	1
												DTT	5.63835		DTT	10.252		DTT	2.39
												TM	1.00914		TM	0.275735		TM	1.32316
												37℃	1.26145		37℃	1.47423		37℃	2.24843
[truncated: 3 more columns]

## Sheet: Run Information
File Name	admin_2022-03-18 14-56-00_CT032202.pcrd
Created By User	admin
Notes
ID
Run Started	03/18/2022 05:56:14 UTC
Run Ended	03/18/2022 07:01:14 UTC
Sample Vol	25
Lid Temp	105
Protocol File Name	CFX_2stepAmp.prcl
Plate Setup File Name	220318 plate catia.pltd
Base Serial Number	CT032202
Optical Head Serial Number	785BR17944
CFX Maestro Version	4.1.2433.1219.
