# Supplementary material for: Evolutionary unique N-glycan-dependent protein quality control system plays pivotal roles in cellular fitness and extracellular vesicle transport in Cryptococcus neoformans
Source: eLife journal article supplement (doi:10.7554/elife.103729), 2024-12-02
Supplement: fig4-data1 [file elife-103729-fig4-data1-v1.zip]

## Sheet: Sheet1
17.12.2020	12:06:13
17.12.2020	12:06:55								0.048
400	24h												OD400 30` 24h
0.734	0.751	1.649	1.536	0.792	0.734	0.062	0.055	0.049	0.048	0.048	0.048			WT	uggt	UGGT
0.265	0.281	0.215	0.306	0.176	0.172	0.201	0.155	0.048	0.049	0.055	0.049		1	0.1295	0.1265	0.1505
0.258	0.293	0.207	0.279	0.179	0.177	0.196	0.166	0.046	0.045	0.046	0.045		2	0.1155	0.1135	0.1495
0.261	0.263	0.197	0.27	0.164	0.172	0.204	0.155	0.047	0.058	0.05	0.049
0.248	0.268	0.198	0.276	0.163	0.151	0.191	0.162	0.053	0.045	0.048	0.05		OD600 30` 24h
0.049	0.048	0.048	0.05	0.05	0.05	0.047	0.055	0.049	0.049	0.045	0.049			WT	uggt	UGGT
0.049	0.048	0.049	0.048	0.048	0.05	0.048	0.047	0.047	0.045	0.046	0.056		1	0.1905	0.188	0.1415		1.905	1.88	1.415
0.049	0.049	0.055	0.061	0.048	0.049	0.05	0.05	0.047	0.049	0.048	0.048		2	0.1795	0.1745	0.133		1.795	1.745	1.33
																					0
17.12.2020	12:05:06												OD400/600 24h
17.12.2020	12:05:51								0.043					WT	uggt	UGGT
600	24h												1	0.067979	0.0672872	0.10636
0.526	0.692	1.327	1.21	0.603	0.557	0.048	0.046	0.043	0.041	0.041	0.042		2	0.0643454	0.065043	0.112406
0.249	0.226	0.192	0.245	0.138	0.141	0.165	0.129	0.042	0.042	0.048	0.043
0.218	0.236	0.177	0.228	0.13	0.148	0.153	0.15	0.039	0.039	0.04	0.039
0.228	0.217	0.173	0.221	0.128	0.139	0.166	0.134	0.041	0.052	0.043	0.042
0.217	0.218	0.179	0.227	0.124	0.119	0.144	0.147	0.044	0.039	0.042	0.043
0.042	0.042	0.042	0.042	0.043	0.043	0.04	0.048	0.042	0.042	0.039	0.042
0.042	0.042	0.041	0.041	0.041	0.043	0.041	0.041	0.041	0.039	0.039	0.05
0.043	0.042	0.047	0.054	0.041	0.042	0.042	0.043	0.041	0.042	0.041	0.041
18.12.2020	11:59:26
18.12.2020	12:00:15								0.048
400	48h
0.697	0.233	1.267	0.757	0.154	0.677	0.064	0.056	0.05	0.049	0.048	0.052		OD400 30` 24h
0.274	0.307	0.238	0.317	0.204	0.205	0.21	0.166	0.25	0.41	0.228	0.281			WT	uggt	UGGT
0.246	0.322	0.249	0.302	0.195	0.2	0.208	0.17	0.296	0.443	0.248	0.264		1	0.1515	0.1545	0.161
0.431	0.337	0.223	0.33	0.187	0.181	0.215	0.168	0.315	0.378	0.289	0.261		2	0.1345	0.1285	0.16
0.308	0.297	0.192	0.339	0.178	0.172	0.201	0.178	0.294	0.388	0.254	0.254
0.05	0.051	0.049	0.05	0.189	0.229	0.213	0.158	0.228	0.276	0.199	0.205		OD600 30` 24h
0.05	0.05	0.05	0.049	0.199	0.23	0.208	0.163	0.218	0.284	0.218	0.163			WT	uggt	UGGT
0.05	0.053	0.053	0.062	0.053	0.049	0.05	0.051	0.048	0.05	0.053	0.05		1	0.25	0.296	0.214		2.5	2.96	2.14
													2	0.341	0.2615	0.2085		3.41	2.615	2.085
18.12.2020	12:01:22
18.12.2020	12:02:00								0.043				OD400/600 24h
600	48h													WT	uggt	UGGT
0.486	0.163	1.102	0.608	0.117	0.494	0.049	0.045	0.042	0.041	0.041	0.045		1	0.0606	0.0521959	0.0752336
0.306	0.328	0.253	0.286	0.158	0.152	0.174	0.14	0.212	0.342	0.209	0.245		2	0.0394428	0.0491396	0.0767386
0.28	0.35	0.261	0.286	0.15	0.16	0.174	0.148	0.24	0.367	0.18	0.216
0.439	0.332	0.264	0.307	0.149	0.146	0.17	0.14	0.252	0.292	0.195	0.234
0.329	0.277	0.239	0.309	0.141	0.136	0.156	0.15	0.213	0.312	0.214	0.211
0.042	0.043	0.042	0.042	0.144	0.164	0.164	0.119	0.162	0.192	0.172	0.113
0.042	0.042	0.041	0.041	0.148	0.169	0.165	0.143	0.169	0.212	0.166	0.153
0.042	0.045	0.044	0.054	0.044	0.042	0.042	0.042	0.04	0.042	0.045	0.042

## Sheet: Sheet2
5.11.2020	15:07:23
5.11.2020	15:08:12								0.047
400	24h												OD400	wt	mu	com	cac1	wt	mu	com	cac1	wt	mu	com	cac1
0.264	0.165	0.287	0.181	0.942	0.739	0.964	1.163	0.399	0.319	0.404	0.294		30`24	0.2135	0.104	0.215	0.1215	1.822	1.326	1.841	2.188	3.285	2.525	3.245	2.395
0.257	0.137	0.237	0.156	0.974	0.681	0.971	1.119	0.352	0.28	0.339	0.279		37`24	0.097	0.112	0.087	0.089	1.197	0.499	1.113	1.671	1.975	1.105	1.84	3.51
0.141	0.158	0.13	0.129	0.663	0.299	0.621	0.856	0.233	0.154	0.266	0.388
0.147	0.16	0.138	0.143	0.628	0.294	0.586	0.909	0.256	0.161	0.196	0.408
0.049	0.046	0.047	0.048	0.046	0.046	0.045	0.045	0.044	0.044	0.05	0.047
0.05	0.047	0.047	0.047	0.046	0.046	0.045	0.044	0.046	0.046	0.043	0.044
0.048	0.048	0.046	0.047	0.046	0.045	0.046	0.045	0.044	0.045	0.045	0.045
0.048	0.047	0.048	0.048	0.047	0.046	0.046	0.046	0.046	0.047	0.047	0.045																OD400/OD600	wt	mu	com	cac1	wt	mu	com	cac1	wt	mu	com	cac1
																											30`24	1.5641	1.2381	1.5035	1.25907	1.4813	1.19783	1.56814	1.2022	1.97892	1.50298	1.43902	0.825862
5.11.2020	15:10:53																										37`24	1.18293	1.25843	1.16779	1.08537	1.58543	1.38997	1.5654	1.26687	1.67373	1.18817	1.96791	1.5
5.11.2020	15:11:39								0.041
600	24h												OD600	wt	mu	com	cac1	wt	mu	com	cac1	wt	mu	com	cac1
0.163	0.14	0.183	0.13	0.632	0.588	0.556	0.938	0.227	0.214	0.228	0.341		30`24	0.1365	0.084	0.143	0.0965	1.23	1.107	1.174	1.82	1.66	1.68	2.255	2.9
0.192	0.11	0.185	0.145	0.68	0.601	0.7	0.964	0.187	0.204	0.305	0.321		37`24	0.082	0.089	0.0745	0.082	0.755	0.359	0.711	1.319	1.18	0.93	0.935	2.34
0.121	0.129	0.112	0.114	0.412	0.216	0.397	0.672	0.131	0.129	0.125	0.271
0.125	0.131	0.119	0.132	0.425	0.225	0.396	0.729	0.187	0.139	0.144	0.279
0.044	0.041	0.041	0.042	0.041	0.041	0.039	0.04	0.04	0.039	0.044	0.042		OD400/600	wt	mu	com	cac1
0.043	0.042	0.042	0.042	0.041	0.041	0.04	0.039	0.041	0.041	0.039	0.04		30도	0.128614	0.0619048	0.0953437	0.0418966
0.042	0.042	0.041	0.042	0.04	0.04	0.04	0.04	0.039	0.04	0.04	0.041		37도	0.0822034	0.12043	0.0930481	0.0380342
0.042	0.042	0.042	0.042	0.042	0.041	0.041	0.041	0.041	0.042	0.042	0.04
