# Supplementary material for: Evolutionary unique N-glycan-dependent protein quality control system plays pivotal roles in cellular fitness and extracellular vesicle transport in Cryptococcus neoformans
Source: eLife journal article supplement (doi:10.7554/elife.103729), 2024-12-02
Supplement: fig4-data1 [file Figure 4 - Supplemental Figure 1B - CFU raw data.xlsx]

## Sheet: Sheet1
lung	WT	ugg1Δ	ugg1Δ/UGG1			Lung dry weight	WT	ugg1Δ	ugg1Δ/UGG1
	6250000000	102500	267093750				0.1	0.04	0.07
	13276153846	1178000	1260312500				0.13	0.05	0.12
	1091727273	125000	5314875000				0.11	0.04	0.1
	4680272727	1	10836000000				0.11	0.03	0.15
	275500000	1	1466500000				0.1	0.05	0.08
	13944000000	1	7101923077				0.1	0.03	0.13
	594500000	1666	1537159091				0.1	0.03	0.03
	633333000000	1	1				0.15	0.03	0.11
brain	WT	ugg1Δ	ugg1Δ/UGG1
	9675000	1666.67	64500
	9975000	1	28200000
	1557500	1	124500000
	10625000	1	26400000
	81250000	1	50100000
	110000000	1	205375000
	38250000	2500	6250000
	169500000	1	1
Spleen	WT	ugg1Δ	ugg1Δ/UGG1
	1404970	1	72000
	756642	1	1507500
	149338	1	3827500
	202470	1	11325000
	145970	1	3105000
	2574950	1	9637500
	88470	1	4246875
	1.42496e+06	1875	1
Liver	WT	ugg1Δ	ugg1Δ/UGG1
	702485	8750	202500
	3562485	1	1.04464e+06
	344990	1	2842500
	918168	1	9031250
	232132	1	2693750
	2.4068e+06	1	3350000
	402761	1	2.33077e+06
	1.6409e+06	1	5357.1
