# Supplementary material for: Evolutionary unique N-glycan-dependent protein quality control system plays pivotal roles in cellular fitness and extracellular vesicle transport in Cryptococcus neoformans
Source: eLife journal article supplement (doi:10.7554/elife.103729), 2024-12-02
Supplement: fig4-data1 [file Figure 4 - Supplemental Figure 1C - CFU raw data.xlsx]

## Sheet: WT
Lung
Strain	10^2	10^3	10^4	10^2	10^3	10^4	Average
WT1	290	34	8	435000	510000	1200000	715000
WT2	344	38	8	516000	570000	1200000	762000
WT3	325	42	6	487500	630000	900000	672500
WT4	291	40	4	436500	600000	600000	545500
WT5	303	52	1	454500	780000	150000	461500
									TOTAL CELLS vs ORGAN WEIGHT
Brain
									Strain	Lung	Brain	Spleen	Liver
Strain	undiluted	10^1	undiluted	10^1	Average				WT1	9.93056e+06	1862.32	1678.16	18003.3
WT1	31	2	155	100	85.6667				WT2	1.04384e+07	2475.18	3115.38	22476.8
WT2	29	4	145	200	116.333				WT3	9.34028e+06	1845.53	1617.28	26200
WT3	25	2	125	100	75.6667				WT4	7.08442e+06	2483.33	1948.72	15005.6
WT4	29	3	145	150	99.3333				WT5	6.5e+06	1795.45	2093.33	12218.8
WT5	27	2	135	100	79
Liver
Strain	10^1	10^2	10^1	10^2	Average
WT1	26	1	3900	1500	1800.33
WT2	31	4	4650	6000	3551.33
WT3	25	3	3750	4500	2751
WT4	16	2	2400	3000	1800.67
WT5	12	2	1800	3000	1600.67
Spleen
Strain	undiluted	10^1	undiluted	10^1	Average
WT1	19	1	95	50	48.6667
WT2	18	3	90	150	81
WT3	16	1	80	50	43.6667
WT4	10	2	50	100	50.6667
WT5	11	2	55	100	52.3333

## Sheet: mns1
Lung
Strain	10^2	10^3	10^4	10^2	10^3	10^4	Average
A1	163	41	2	244500	615000	300000	386500
A2	179	64	7	268500	960000	1050000	759500
A3	196	88	5	294000	1320000	750000	788000
A4	150	55	5	225000	825000	750000	600000
A5	176	69	5	264000	1035000	750000	683000
									TOTAL CELLS vs ORGAN WEIGHT
Brain
									Strain	Lung	Brain	Spleen	Liver
Strain	원액	10^1	원액	10^1	Average				A1	5.60145e+06	1652.48	1958.33	18187.9
A1	16	3	80	150	77.6667				A2	1.06972e+07	937.984	3256.41	9193.63
A2	14	1	70	50	40.3333				A3	1.10986e+07	1410.85	2714.29	20698.3
A3	16	2	80	100	60.6667				A4	8.10811e+06	1651.52	1738.1	10003.3
A4	13	3	65	150	72.6667				A5	9.35616e+06	2015.87	2333.33	15861.8
A5	10	4	50	200	84.6667
Liver
Strain	10^1	10^2	10^1	10^2	Average
A1	20	2	3000	3000	2000.67
A2	15	1	2250	1500	1250.33
A3	18	3	2700	4500	2401
A4	10	1	1500	1500	1000.33
A5	9	3	1350	4500	1951
Spleen
Strain	원액	10^1	원액	10^1	Average
A1	18	1	90	50	47
A2	10	4	50	200	84.6667
A3	15	3	75	150	76
A4	19	1	95	50	48.6667
A5	10	3	50	150	67.6667

## Sheet: mns101
Lung
Strain	10^2	10^3	10^4	10^2	10^3	10^4	Average
B1	135	35	1	202500	525000	150000	292500
B2	128	21	5	192000	315000	750000	419000
B3	133	27	3	199500	405000	450000	351500
B4	140	38	1	210000	570000	150000	310000
B5	148	42	6	222000	630000	900000	584000
									TOTAL CELLS vs ORGAN WEIGHT
Brain
									Strain	Lung	Brain	Spleen	Liver
Strain	원액	10^1	원액	10^1	Average				B1	4.30147e+06	1523.81	3506.17	15989.1
B1	18	2	90	100	64				B2	6.34848e+06	948.718	3128.21	9926.21
B2	12	1	60	50	37				B3	5.0942e+06	1767.44	1066.67	11828.8
B3	15	3	75	150	76				B4	4.62687e+06	1777.78	2333.33	20009.5
B4	18	2	90	100	64				B5	8.46377e+06	1125.93	2293.33	8406.16
B5	10	2	50	100	50.6667
Liver
Strain	10^1	10^2	10^1	10^2	Average
B1	19	2	2850	3000	1950.67
B2	16	1	2400	1500	1300.33
B3	15	2	2250	3000	1750.67
B4	12	3	1800	4500	2101
B5	10	1	1500	1500	1000.33
Spleen
Strain	원액	10^1	원액	10^1	Average
B1	16	4	80	200	94.6667
B2	8	4	40	200	81.3333
B3	9	1	45	50	32
B4	10	3	50	150	67.6667
B5	14	2	70	100	57.3333

## Sheet: mns1_101
Lung
Strain	10^2	10^3	10^4	10^2	10^3	10^4	Average
AB1	10	4	0	15000	60000	0	25000
AB2	11	6	0	16500	90000	0	35500
AB3	12	3	1	18000	45000	150000	71000
AB4	17	5	0	25500	75000	0	33500
AB5	16	3	0	24000	45000	0	23000
									TOTAL CELLS vs ORGAN WEIGHT
Brain
									Strain	Lung	Brain	Spleen	Liver
Strain	원액	10^1	원액	10^1	Average				AB1	431034	121.951	119.048	1171.88
AB1	3	0	15	0	5				AB2	771739	72.4638	192.308	1893.94
AB2	2	0	10	0	3.33333				AB3	1.57778e+06	42.735	123.457	775.194
AB3	1	0	5	0	1.66667				AB4	670000	92.5926	114.943	1600
AB4	2	0	10	0	3.33333				AB5	418182	40.6504	185.185	719.424
AB5	1	0	5	0	1.66667
Liver
Strain	10^1	10^2	10^1	10^2	Average
AB1	3	0	450	0	150
AB2	5	0	750	0	250
AB3	2	0	300	0	100
AB4	4	0	600	0	200
AB5	2	0	300	0	100
Spleen
Strain	원액	10^1	원액	10^1	Average
AB1	2	0	10	0	3.33333
AB2	3	0	15	0	5
AB3	2	0	10	0	3.33333
AB4	2	0	10	0	3.33333
AB5	3	0	15	0	5

## Sheet: mns1_101(MNS1)
Lung
Strain	10^2	10^3	10^4	10^2	10^3	10^4	Average
AB (A)1	126	10	3	189000	150000	450000	263000
AB (A)2	121	28	1	181500	420000	150000	250500
AB (A)3	129	38	3	193500	570000	450000	404500
AB (A)4	114	11	0	171000	165000	0	112000
AB (A)5	120	7	1	180000	105000	150000	145000
									TOTAL CELLS vs ORGAN WEIGHT
Brain
									Strain	Lung	Brain	Spleen	Liver
Strain	원액	10^1	원액	10^1	Average				AB (A)1	4.1746e+06	562.5	1061.73	8549.86
AB (A)1	6	1	30	50	27				AB (A)2	3.85385e+06	727.273	500	14290.7
AB (A)2	9	1	45	50	32				AB (A)3	6.63115e+06	716.667	576.923	7145.24
AB (A)3	7	1	35	50	28.6667				AB (A)4	1.86667e+06	1101.45	763.889	9262.35
AB (A)4	10	2	50	100	50.6667				AB (A)5	2.45763e+06	1365.08	1688.89	10745.7
AB (A)5	14	2	70	100	57.3333
Liver
Strain	10^1	10^2	10^1	10^2	Average
AB (A)1	10	1	1500	1500	1000.33
AB (A)2	18	2	2700	3000	1900.67
AB (A)3	10	1	1500	1500	1000.33
AB (A)4	10	1	1500	1500	1000.33
AB (A)5	9	2	1350	3000	1450.67
Spleen
Strain	원액	10^1	원액	10^1	Average
AB (A)1	7	1	35	50	28.6667
AB (A)2	9	0	45	0	15
AB (A)3	9	0	45	0	15
AB (A)4	11	0	55	0	18.3333
AB (A)5	10	2	50	100	50.6667

## Sheet: mns1_101(MNS101)
Lung
Strain	10^2	10^3	10^4	10^2	10^3	10^4	Average
AB (B)1	131	32	2	196500	480000	300000	325500
AB (B)2	120	21	4	180000	315000	600000	365000
AB (B)3	137	23	3	205500	345000	450000	333500
AB (B)4	149	35	5	223500	525000	750000	499500
AB (B)5	135	25	3	202500	375000	450000	342500
									TOTAL CELLS vs ORGAN WEIGHT
Brain
									Strain	Lung	Brain	Spleen	Liver
Strain	원액	10^1	원액	10^1	Average				AB (B)1	4.52083e+06	1325.4	1946.67	17615
AB (B)1	13	2	65	100	55.6667				AB (B)2	5.28986e+06	1439.72	1185.19	9275.94
AB (B)2	10	3	50	150	67.6667				AB (B)3	4.90441e+06	2500	1448.28	6554.02
AB (B)3	15	5	75	250	110				AB (B)4	6.57237e+06	1255.81	1213.33	25966.9
AB (B)4	12	2	60	100	54				AB (B)5	4.75694e+06	1615.94	1688.89	15159.1
AB (B)5	14	3	70	150	74.3333
Liver
Strain	10^1	10^2	10^1	10^2	Average
AB (B)1	10	4	1500	6000	2501.33
AB (B)2	8	2	1200	3000	1400.67
AB (B)3	9	1	1350	1500	950.333
AB (B)4	18	5	2700	7500	3401.67
AB (B)5	10	3	1500	4500	2001
Spleen
Strain	원액	10^1	원액	10^1	Average
AB (B)1	19	1	95	50	48.6667
AB (B)2	9	1	45	50	32
AB (B)3	15	1	75	50	42
AB (B)4	8	1	40	50	30.3333
AB (B)5	10	2	50	100	50.6667
