# Supplementary material for: Evolutionary unique N-glycan-dependent protein quality control system plays pivotal roles in cellular fitness and extracellular vesicle transport in Cryptococcus neoformans
Source: eLife journal article supplement (doi:10.7554/elife.103729), 2024-12-02
Supplement: fig4-data1 [file Figure 4C - capsule thickness raw data.xlsx]

## Sheet: Sheet1
	H99 dw	H99 dc	H99 dw-dc	mns1 dw	mns1 dc	mns1 dw-dc	mns101 dw	mns101 dc	mns101 dw-dc	mns1/101 dw	mns1/101 dc	mns1/101 dw-dc	mns1 comp dw	mns1 comp dc	dw-dc	mns101 comp dw	mns101 comp dc	dw-dc
1	11.895	5.362	6.533	10.709	4.542	6.167	10.783	5.281	5.502	7.938	4.04	3.898	12.951	6.915	6.036	11.058	4.987	6.071
2	11.768	5.133	6.635	9.904	3.918	5.986	11.303	5.465	5.838	7.796	4.588	3.208	12.903	5.82	7.083	10.946	4.839	6.107
3	12.507	4.892	7.615	10.971	5.823	5.148	11.894	5.364	6.53	7.925	4.674	3.251	11.544	5.676	5.868	11.96	5.821	6.139
4	12.643	5.704	6.939	10.445	4.487	5.958	10.567	3.965	6.602	7.875	3.941	3.934	12.291	5.415	6.876	11.599	5.021	6.578
5	10.7	4.431	6.269	10.252	5.191	5.061	10.746	4.871	5.875	8.557	4.6	3.957	11.968	5.152	6.816	11.446	4.591	6.855
6	11.549	5.522	6.027	11.759	6.551	5.208	10.864	5.554	5.31	7.371	4.366	3.005	11.333	4.04	7.293	11.186	4.615	6.571
7	11.926	4.296	7.63	11.321	5.581	5.74	11.212	4.358	6.854	9.295	5.825	3.47	12.16	4.94	7.22	11.288	4.805	6.483
8	11.787	4.115	7.672	10.751	5.089	5.662	10.053	4.738	5.315	8.387	5.121	3.266	11.448	4.959	6.489	12.004	4.765	7.239
9	12.028	4.833	7.195	11.36	5.152	6.208	10.486	5.312	5.174	9.11	5.514	3.596	12.202	6.416	5.786	10.28	4.06	6.22
10	12.156	5.005	7.151	10.984	5.201	5.783	10.905	4.328	6.577	8.346	5.094	3.252	10.63	4.541	6.089	11.87	4.994	6.876
11	11.984	5.005	6.979	11.159	4.986	6.173	11.008	4.953	6.055	7.433	3.78	3.653	12.138	5.782	6.356	10.721	4.285	6.436
12	12.096	4.466	7.63	11.155	5.187	5.968	10.424	4.267	6.157	8.12	4.791	3.329	10.398	4.394	6.004	12.039	5.001	7.038
13	11.953	4.129	7.824	11.009	4.561	6.448	10.397	5.287	5.11	8.174	5.112	3.062	11.351	4.564	6.787	11.162	5.112	6.05
14	11.639	5.399	6.24	11.161	5.135	6.026	10.484	4.922	5.562	9.173	5.442	3.731	11.169	4.809	6.36	11.689	4.755	6.934
15	12.044	5.618	6.426	11.762	5.433	6.329	12.402	5.98	6.422	8.773	5.678	3.095	12.508	5.595	6.913	11.902	4.729	7.173
16	11.409	4.215	7.194	11.858	5.848	6.01	10.526	5.356	5.17	9.282	5.489	3.793	12.322	5.961	6.361	11.476	4.676	6.8
17	11.679	5.168	6.511	10.807	5.171	5.636	10.64	4.956	5.684	8.693	5.191	3.502	13.681	6.441	7.24	11.831	4.807	7.024
18	12.37	5.201	7.169	12.35	6.082	6.268	11.332	5.023	6.309	9.117	5.347	3.77	13.142	6.748	6.394	10.95	4.764	6.186
19	10.944	4.129	6.815	11.561	5.012	6.549	9.499	4.359	5.14	8.77	5.371	3.399	12.869	5.901	6.968	12.019	5.36	6.659
20	10.728	4.491	6.237	12.004	5.985	6.019	10.287	4.064	6.223	9.354	5.534	3.82	11.115	4.777	6.338	11.822	4.961	6.861
	mns1/101_mns1 comp dw	mns1/101_mns1 comp dc	dw-dc	mns1/101_101 comp dw	mns1/101_101 comp dc	dw-dc	ugg1 dw	ugg1 dc	dw-dc	UGG1 dw	UGG1 dc	dw-dc
1	12.938	7.097	5.841	11.976	5.561	6.415	8.984	6.42	2.564	12.752	5.3	7.452
2	11.356	5.12	6.236	11.888	5.719	6.169	5.531	3.943	1.588	12.739	5.225	7.514
3	11.418	5.543	5.875	11.248	5.875	5.373	9.053	6.61	2.443	11.395	4.432	6.963
4	11.201	5.085	6.116	11.377	6.218	5.159	9.446	7.358	2.088	11.277	4.318	6.959
5	12.619	5.926	6.693	10.532	5.296	5.236	8.984	6.223	2.761	12.763	5.788	6.975
6	10.364	5.178	5.186	11.914	5.579	6.335	9.592	6.55	3.042	11.696	5.552	6.144
7	10.938	4.846	6.092	11.738	6.206	5.532	9.596	6.617	2.979	11.459	4.71	6.749
8	11.572	5.368	6.204	11.255	5.694	5.561	8.237	5.85	2.387	12.385	5.109	7.276
9	11.756	5.125	6.631	12.006	5.967	6.039	7.258	5.338	1.92	11.957	4.381	7.576
10	10.832	5.167	5.665	12.207	6.43	5.777	5.946	3.913	2.033	12.541	5.493	7.048
11	11.875	5.327	6.548	12.135	6.51	5.625	7.339	4.899	2.44	12.665	5.927	6.738
12	11.295	5.455	5.84	11.857	5.47	6.387	7.546	5.196	2.35	11.53	5.287	6.243
13	11.441	5.885	5.556	10.898	5.049	5.849	6.384	4.727	1.657	11.764	4.061	7.703
14	11.796	6.175	5.621	12.099	5.287	6.812	7.683	5.836	1.847	11.491	4.631	6.86
15	11.705	5.618	6.087	11.926	5.828	6.098	7.594	5.95	1.644	11.817	4.465	7.352
16	10.725	4.966	5.759	10.953	5.66	5.293	5.186	4.102	1.084	11.931	4.875	7.056
17	11.138	5.78	5.358	11.56	5.401	6.159	7.238	5.206	2.032	12.283	5.355	6.928
18	11.066	4.57	6.496	11.306	4.959	6.347	7.395	4.854	2.541	12.954	6.079	6.875
19	11.639	5.555	6.084	11.598	5.385	6.213	6.641	4.678	1.963	11.897	4.142	7.755
20	10.569	5.096	5.473	12.076	5.941	6.135	8.647	6.201	2.446	12.036	5.297	6.739
