# Supplementary material for: Evolutionary unique N-glycan-dependent protein quality control system plays pivotal roles in cellular fitness and extracellular vesicle transport in Cryptococcus neoformans
Source: eLife journal article supplement (doi:10.7554/elife.103729), 2024-12-02
Supplement: fig4-data1 [file Figure 4E - in vitro survival raw data.xlsx]

## Sheet: Sheet1
50cells (control)
	WT	mns1	mns1	mns1/101	mns1/101_MNS1	mns1/101_MNS101	ugg1	UGG1
	49	50	49	50	49	52	49	53
	51	50	48	49	51	50	51	51
	51	48	54	48	54	53	48	50
	54	50	47	53	49	50	46	47
only strain (cell imput)
	WT	mns1	mns1	mns1/101	mns1/101_MNS1	mns1/101_MNS101	ugg1	UGG1
	88	88	85	87	88	87	30	87
	89	86	89	88	87	89	31	89
	82	83	82	81	83	82	40	80
	85	84	84	83	84	84	34	85
only strain (*2000)
	WT	mns1	mns1	mns1/101	mns1/101_MNS1	mns1/101_MNS101	ugg1	UGG1
	176000	176000	170000	174000	176000	174000	60000	174000
	178000	172000	178000	176000	174000	178000	62000	178000
	164000	166000	164000	162000	166000	164000	80000	160000
	170000	168000	168000	166000	168000	168000	68000	170000
survival rate
	WT	mns1	mns1	mns1/101	mns1/101_MNS1	mns1/101_MNS101	ugg1	UGG1
	90	87	81	48	83	82	8	82
	84	85	82	52	80	80	13	85
	87	84	83	48	79	83	14	88
	88	88	85	52	81	84	10	81
	83	89	86	46	80	87	11	88
survival rate (*2000)
	WT	mns1	mns1	mns1/101	mns1/101_MNS1	mns1/101_MNS101	ugg1	UGG1
	180000	174000	162000	96000	166000	164000	16000	164000
	168000	170000	164000	104000	160000	160000	26000	170000
	174000	168000	166000	96000	158000	166000	28000	176000
	176000	176000	170000	104000	162000	168000	20000	162000
	166000	178000	172000	92000	160000	174000	22000	176000
