# Supplementary material for: Evolutionary unique N-glycan-dependent protein quality control system plays pivotal roles in cellular fitness and extracellular vesicle transport in Cryptococcus neoformans
Source: eLife journal article supplement (doi:10.7554/elife.103729), 2024-12-02
Supplement: fig5-data1 [file elife-103729-fig5-data1-v1.zip]

## Sheet: control plate
Software Version	3.11.19
Experiment File Path:
Protocol File Path:
Plate Number	Plate 1
Date	2022-06-15
Time	오후 5:19:25
Reader Type:	Synergy H1
Reader Serial Number:	20092817
Reading Type	Reader
Procedure Details
Plate Type	96 WELL PLATE
Eject plate on completion
Read	Fluorescence Endpoint
	Full Plate
	Filter Set 1
	Excitation: 488, Emission: 519
	Optics: Top, Gain: 100
	Light Source: Xenon Flash, Lamp Energy: High
	Read Speed: Normal, Delay: 100 msec, Measurements/Data Point: 10
	Read Height: 7 mm
488519
Actual Temperature:	25.7	control plate - no transfer
		1	2	3	4	5	6	7	8	9	10	11	12				1	2	3	4	5	6	7	8	9	10	11	12
WT	A	40669	42257	40074	210	46573	48841	44781	205	204	196	208	207	488519		A	0.793	0.797	0.769	0.04	0.941	1.005	0.914	0.04	0.04	0.04	0.04	0.04	600
ugg1	B	749	741	682	206	683	702	614	192	215	204	205	203	488519		B	1.357	1.317	1.278	0.04	1.543	1.558	1.466	0.04	0.041	0.04	0.04	0.04	600
mns1/101	C	51405	57546	61586	209	47693	48247	44128	206	211	200	196	200	488519		C	1.719	1.714	1.673	0.04	1.315	1.308	1.299	0.04	0.046	0.04	0.041	0.041	600
cap59	D	1081	1043	1019	195	1001	921	943	190	192	208	196	199	488519		D	1.775	1.752	1.726	0.041	1.677	1.669	1.64	0.04	0.042	0.04	0.04	0.04	600
	E	205	203	200	191	190	200	201	182	196	195	187	193	488519		E	0.01	0.04	0.04	0.04	0.04	0.04	0.04	0.04	0.042	0.04	0.04	0.04	600
	F	205	201	194	193	184	187	185	196	188	200	193	195	488519		F	0.041	0.04	0.04	0.04	0.04	0.04	0.04	0.04	0.04	0.04	0.041	0.04	600
	G	203	192	192	186	204	200	197	197	192	199	191	187	488519		G	0.04	0.04	0.042	0.041	0.043	0.04	0.04	0.041	0.04	0.04	0.041	0.04	600
	H	208	191	193	199	191	189	200	195	192	191	197	207	488519		H	0.04	0.04	0.04	0.04	0.042	0.04	0.04	0.04	0.04	0.04	0.04	0.04	600
	WT	41000				46731.7										WT	0.786333				0.953333
	ugg1	724				666.333										ugg1	1.31733				1.52233
	mns1/101	56845.7				46689.3										mns1/101	1.702				1.30733
	cap59	1047.67				955										cap59	1.751				1.662
						197
			1st	2nd
		WT	52140.7	49019.2
		ugg1	549.595	437.705
		mns1/101	33399.3	35713.4
		cap59	598.325	574.609

## Sheet: Transfer plate
Software Version	3.11.19
Experiment File Path:
Protocol File Path:
Plate Number	Plate 2
Date	2022-06-15
Time	오후 5:23:01
Reader Type:	Synergy H1
Reader Serial Number:	20092817
Reading Type	Reader
Procedure Details
Plate Type	96 WELL PLATE
Eject plate on completion
Read	Fluorescence Endpoint
	Full Plate
	Filter Set 1
	Excitation: 488, Emission: 519
	Optics: Top, Gain: 100
	Light Source: Xenon Flash, Lamp Energy: High
	Read Speed: Normal, Delay: 100 msec, Measurements/Data Point: 10
	Read Height: 7 mm
488519
Actual Temperature:	25.8		WT GXM transfer				ugg1 GXM transfer				mns1/101 GXM transfer
																		WT GXM transfer				ugg1 GXM transfer				mns1/101 GXM transfer
		1	2	3	4	5	6	7	8	9	10	11	12
WT	A	108423	112894	109453	208	45814	45074	46017	213	46929	44214	44923	206	488519		+	1	2	3	4	5	6	7	8	9	10	11	12
WT	B	1009389	101153	100694	207	79878	77557	69461	214	102770	101357	97118	195	488519	WT	A	0.765	0.694	0.699	0.04	0.945	0.934	1.268	0.04	0.901	0.902	0.978	0.04	600
ugg1	C	42002	42551	40859	192	1047	1072	982	197	23927	24375	22019	210	488519	WT	B	1.972	1.997	1.955	0.04	1.359	1.345	1.305	0.04	1.631	1.625	1.609	0.04	600
ugg1	D	53651	72468	64438	193	374	373	1418	199	32320	34029	30923	199	488519	ugg1	C	0.985	0.978	0.899	0.04	1.516	1.539	1.492	0.04	0.775	0.774	0.763	0.047	600
mns1/101	E	100214	102720	102197	196	44606	40788	48873	197	59670	53489	55945	201	488519	ugg1	D	1.599	1.567	1.488	0.04	0.992	0.984	1.337	0.04	1.112	1.035	1.101	0.04	600
mns1/101	F	109820	104187	99679	203	42414	47027	49367	217	51434	42065	49098	201	488519	mns1/101	E	1.473	1.473	1.417	0.04	1.681	1.679	1.669	0.04	1.737	1.732	1.618	0.04	600
cap59	G	110083	108683	104056	206	580	589	588	213	84530	90135	86436	195	488519	mns1/101	F	1.588	1.573	1.563	0.042	1.591	1.606	1.578	0.044	1.247	1.253	1.176	0.04	600
cap59	H	104708	109320	111196	192	996	954	931	204	81660	83718	80217	199	488519	cap59	G	1.748	1.727	1.714	0.04	1.327	1.369	1.38	0.041	1.718	1.731	1.715	0.04	600
												.			cap59	H	1.63	1.618	1.597	0.04	1.732	1.727	1.7	0.042	1.548	1.556	1.52	0.04	600
																	0.719333				1.049				0.927
																	1.97467				1.33633				1.62167
																	0.954				1.51567				0.770667
																	1.55133				1.10433				1.08267
		110257				45635				45355.3							1.45433				1.67633				1.69567
		403745				75632				100415							1.57467				1.59167				1.22533
		41804				1033.67				23440.3							1.72967				1.35867				1.72133
		63519				721.667				32424							1.615				1.71967				1.54133
		101710				44755.7				56368
		104562				46269.3				47532.3
		107607				585.667				87033.7			1st					2nd
		108408				960.333				81865				WT transfer	uggt transfer	AB transfer			WT transfer	uggt transfer	AB transfer
													WT	213081	43503.3	48927		WT	204463	56596.7	61920.9
													ugg1	43819.7	681.988	30415.7		ugg1	40944.8	653.486	29948.3
		153276				43503.3				48927			mns1/101	69936.1	26698.5	33242.4		mns1/101	66402.6	29069.7	38791.3
		204463				56596.7				61920.9			cap59	62212.8	431.06	50561.8		cap59	67125.7	558.442	53113.1
		43819.7				681.988				30415.7
		40944.8				653.486				29948.3
		69936.1				26698.5				33242.4
		66402.6				29069.7				38791.3
		62212.8				431.06				50561.8
		67125.7				558.442				53113.1

## Sheet: rim101 control+transfer
Software Version	3.11.19
Experiment File Path:
Protocol File Path:
Plate Number	Plate 1
Date	2022-06-15
Time	오후 5:25:19
Reader Type:	Synergy H1
Reader Serial Number:	20092817
Reading Type	Reader
Procedure Details
Plate Type	96 WELL PLATE (Use plate lid)
Eject plate on completion
Read	Fluorescence Endpoint
	Full Plate
	Filter Set 1
	Excitation: 488, Emission: 528
	Optics: Top, Gain: 100
	Light Source: Xenon Flash, Lamp Energy: High
	Read Speed: Normal, Delay: 100 msec, Measurements/Data Point: 10
	Read Height: 7 mm
488528
Actual Temperature:	36.3						Biological duplication									OD600
		1	2	3	4	5	6	7	8	9	10	11	12				1	2	3	4	5	6	7	8	9	10	11	12
cap59 control	A	628	628	624	156	455	473	462	150	159	159	152	150	488528		A	1.77	1.764	1.754	0.04	1.686	1.688	1.691	0.04	0.039	0.039	0.04	0.039	600
cap59 transfer w/ WT	B	18673	18589	18195	161	19134	19159	18602	159	150	162	150	149	488528		B	1.581	1.579	1.57	0.04	1.601	1.611	1.594	0.04	0.04	0.041	0.04	0.039	600
rim101 control	C	366	377	384	162	357	349	353	150	148	161	152	151	488528		C	1.484	1.503	1.491	0.04	1.353	1.355	1.346	0.04	0.04	0.04	0.04	0.039	600
rim101 transfer w/ WT	D	351	368	295	142	323	342	341	152	151	163	152	137	488528		D	1.308	1.311	1.315	0.041	1.32	1.326	1.322	0.04	0.04	0.04	0.039	0.039	600
	E	143	150	151	145	142	147	147	152	152	155	160	156	488528		E	0.041	0.041	0.04	0.04	0.039	0.04	0.041	0.04	0.041	0.04	0.04	0.04	600
	F	156	150	143	150	141	136	138	148	151	150	141	144	488528		F	0.039	0.039	0.039	0.041	0.04	0.039	0.039	0.04	0.04	0.04	0.04	0.039	600
	G	146	154	150	145	148	148	139	145	155	145	153	150	488528		G	0.039	0.04	0.04	0.04	0.04	0.04	0.04	0.039	0.039	0.045	0.039	0.039	600
	H	144	151	139	150	141	132	140	148	140	153	144	150	488528		H	0.039	0.039	0.039	0.04	0.039	0.04	0.04	0.04	0.041	0.039	0.04	0.039	600
		626.667				463.333											1.76267				1.68833
		18485.7				18965											1.57667				1.602
		375.667				353											1.49267				1.35133
		338				335.333											1.31133				1.32267
		1st					2nd	`
			WT transfer					WT transfer
		cap59 control	355.522				cap59 control	274.432
		cap59 transfer w/ WT	11724.5				cap59 transfer w/ WT	11838.3
		rim101 control	251.675				rim101 control	261.223
		rim101 transfer w/ WT	257.753				rim101 transfer w/ WT	253.528
