# Supplementary material for: Evolutionary unique N-glycan-dependent protein quality control system plays pivotal roles in cellular fitness and extracellular vesicle transport in Cryptococcus neoformans
Source: eLife journal article supplement (doi:10.7554/elife.103729), 2024-12-02
Supplement: fig6-data1 [file elife-103729-fig6-data1-v1.zip]

## Sheet: Sheet1
Capsule biosynthesis				Average of normalized data (log2)					Capsule biosynthesis		Average of normalized data (log2)
gene product annotation	CNAG ID	fold change	description	H99	uggt				gene product annotation	CNAG ID	H99	uggt
Cap60	CNAG_00600	1.24645	capsule-related protein	5.8639	6.18172				Cap60	CNAG_00600	5.8639	6.18172
Cap59	CNAG_00721	1.02534	capsule-related protein (traffic of GXM)	6.07954	6.11564				Cap59	CNAG_00721	6.07954	6.11564
Cap64	CNAG_02885	1.11963	capsule-related protein	6.76765	6.93068				Cap64	CNAG_02885	6.76765	6.93068
Cap2	CNAG_01156	1.19676	Homology to Cap	5.64983	5.90896				Cap2	CNAG_01156	5.64983	5.90896
Cap10	CNAG_07554	1.05556	capsule-related protein	6.58583	6.66384				Cap10	CNAG_07554	6.58583	6.66384
Pmt4	CNAG_00996	0.935234	dolichyl-phosphate-mannose-protein mannosyltransferase (Protein-O-mannosyltransferases catalyze the initial step of protein-O-glycosylation, the addition of mannose residues to serine or threonine residues of target proteins)	6.54514	6.44854				Pmt4	CNAG_00996	6.54514	6.44854
Cmt1	CNAG_03158	1.09929	a-1,3-mannosyltransferase (mannose metabolism)	4.17318	4.30974				Cmt1	CNAG_03158	4.17318	4.30974
Cas1	CNAG_07937	1.1486	Further modification of GXM and GXMGal comes through O-acetylation, and this is performed by the Cas1 glycosyltransferase	5.20627	5.40615				Cas1	CNAG_07937	5.20627	5.40615
Uge1	CNAG_03096	1.10807	UDP-galactose, which is required for GXMGal, is created from UDP-glucose by the Uge1 epimerase	5.8126	5.96064				Uge1	CNAG_03096	5.8126	5.96064
Ugd1	CNAG_04969	1.08579	UDP-glucuronic acid is made from the conversion of UDP-glucose to UDP-glucuronic acid via the membrane-localized Ugd1 UDP-glucose dehydrogenase	8.43517	8.55391				Ugd1	CNAG_04969	8.43517	8.55391
									Capsule attachment & cell wall remodeling
Capsule attachment & cell wall remodeling									Chs4	CNAG_00546	4.59368	5.61095
gene product annotation	CNAG ID	fold change	description						Chs7	CNAG_02217	1.42582	6.19459
Chs4	CNAG_00546	2.0241	chitin synthase 4	4.59368	5.61095				Cda2	CNAG_01230	8.44256	9.74892
Chs7	CNAG_02217	27.2611	chitin synthase 7	1.42582	6.19459				Skn1	CNAG_00897	5.35655	7.00431
Cda2	CNAG_01230	2.47318	chitin deacetylase 2	8.44256	9.74892				Kre6	CNAG_00914	6.88042	7.99385
Skn1	CNAG_00897	3.13346	Recently, the Skn1/Kre6 family of potential β-1,6 glucan synthases was examined in detail, and Gilbert et al. demonstrated that Kre5 and both Kre6 and Skn1 are required for maintenance of normal capsular architecture, as determined by dextran penetrance and India ink staining	5.35655	7.00431					CNAG_06336	5.40154	7.77869
Kre6	CNAG_00914	2.1636		6.88042	7.99385				EXG104	CNAG_02225	2.00217	3.63284
	CNAG_06336	5.19508	Glucan 1,3-β-glucosidase protein	5.40154	7.77869				EBG1	CNAG_02860	7.56367	8.73263
EXG104	CNAG_02225	3.09657	glucan 1,3-beta-glucosidase (polysaccharide degradation, cell wall remodeling)	2.00217	3.63284				Kre63	CNAG_06031	0.658749	2.5779
EBG1	CNAG_02860	2.24849	endo-1,3(4)-beta-glucanase	7.56367	8.73263				Secretion
Kre63	CNAG_06031	3.78202	beta-glucan synthesis-associated protein, β-glucan synthase, involved in capsule and cell wall formation, deletion has decreased virulence (Gilbert et al., 2010)	0.658749	2.5779				SAV1	CNAG_02817	8.30432	8.36913
									SEC6	CNAG_01911	5.05568	4.82736
secretion									ARF1	CNAG_04258	5.57134	6.02214
gene product annotation	CNAG ID	fold change	description						VPH1	CNAG_01106	6.20932	6.06774
SAV1	CNAG_02817	1.04594	a small GTPase of the Rab subfamily that acts as a “master regulator” of exocytosis	8.30432	8.36913				SEC14	CNAG_03153	8.57049	8.71266
SEC6	CNAG_01911	0.853628	part of a protein complex involved in polarized fusion of exocytic vesicles with the plasma membrane	5.05568	4.82736				APT1	CNAG_06469	5.03308	5.18454
ARF1	CNAG_04258	1.36679	an ADP-ribosylating factor involved in vesicle formation and intracellular trafficking via the Golgi apparatus, is involved in capsule secretion.	5.57134	6.02214				GRASP	CNAG_03291	5.51745	5.42903
VPH1	CNAG_01106	0.906524	Vph1, a V-type ATPase that is required for vesicle acidification, is important for capsule transport	6.20932	6.06774
SEC14	CNAG_03153	1.10356	homologue of the phosphatidylinositol transfer protein (PITP) ScSec14p, which is essential for secretion and viability in Saccharomyces cerevisiae	8.57049	8.71266
APT1	CNAG_06469	1.11069	Lipid flippases of the P4-ATPase family are ATP-driven transporters that translocate lipids from the exoplasmic to the cytosolic leaflet of biological membranes	5.03308	5.18454
GRASP	CNAG_03291	0.940549	Golgi reassembly and stack protein (GRASP) was shown to be required for capsule secretion	5.51745	5.42903

## Sheet: Sheet2
Capsule biosynthesis		Average of normalized data (log2)
gene product annotation	CNAG ID	H99	uggt
Cap60	CNAG_00600	5.8639	6.18172
Cap59	CNAG_00721	6.07954	6.11564
Cap64	CNAG_02885	6.76765	6.93068
Cap2	CNAG_01156	5.64983	5.90896
Cap10	CNAG_07554	6.58583	6.66384
Pmt4	CNAG_00996	6.54514	6.44854
Cmt1	CNAG_03158	4.17318	4.30974
Cas1	CNAG_07937	5.20627	5.40615
Uge1	CNAG_03096	5.8126	5.96064
Ugd1	CNAG_04969	8.43517	8.55391
Capsule attachment & cell wall remodeling
Chs4	CNAG_00546	4.59368	5.61095
Chs7	CNAG_02217	1.42582	6.19459
Cda2	CNAG_01230	8.44256	9.74892
Skn1	CNAG_00897	5.35655	7.00431
Kre6	CNAG_00914	6.88042	7.99385
	CNAG_06336	5.40154	7.77869
EXG104	CNAG_02225	2.00217	3.63284
EBG1	CNAG_02860	7.56367	8.73263
Kre63	CNAG_06031	0.658749	2.5779
Secretion
SAV1	CNAG_02817	8.30432	8.36913
SEC6	CNAG_01911	5.05568	4.82736
ARF1	CNAG_04258	5.57134	6.02214
VPH1	CNAG_01106	6.20932	6.06774
SEC14	CNAG_03153	8.57049	8.71266
APT1	CNAG_06469	5.03308	5.18454
GRASP	CNAG_03291	5.51745	5.42903
