# Supplementary material for: Evolutionary unique N-glycan-dependent protein quality control system plays pivotal roles in cellular fitness and extracellular vesicle transport in Cryptococcus neoformans
Source: eLife journal article supplement (doi:10.7554/elife.103729), 2024-12-02
Supplement: fig7-data1 [file elife-103729-fig7-data1-v1.zip]

## Sheet: Sheet1
Urease assay		Intracellular					Secretion
	WT	ugg1Δ	mns1Δ101Δ	cap59Δ	WT	ugg1Δ	mns1Δ101Δ	cap59Δ
	0.257	0.146	0.247	0.226	1.432	0.937	1.291	1.108
	0.251	0.16	0.234	0.213	1.496	0.804	1.303	1.112
	0.234	0.159	0.25	0.23	1.492	0.91	1.298	1.096
	0.259	0.163	0.227	0.209	1.31	0.789	1.3	1.125
Phosphatase assay
	WT	ugg1Δ	mns1Δ101Δ	cap59Δ	WT	ugg1Δ	mns1Δ101Δ	cap59Δ
	2.113	2.043	2.107	2.283	1.135	0.825	1.093	0.346
	2.091	2.038	2.046	2.129	1.269	0.771	1.087	0.4
	2.093	2.031	2.094	2.196	1.207	0.859	1.121	0.362
	2.12	2.024	2.075	2.16	1.174	0.76	1.096	0.344
Laccase assay
	WT	ugg1Δ	mns1Δ101Δ	cap59Δ	WT	ugg1Δ	mns1Δ101Δ	cap59Δ
	0.645	0.699	0.624	0.63	0.418	0.275	0.386	0.353
	0.635	0.763	0.612	0.624	0.435	0.315	0.409	0.42
	0.651	0.669	0.599	0.621	0.558	0.37	0.561	0.413
	0.645	0.648	0.616	0.618	0.571	0.381	0.545	0.425
Cellulase assay
	WT	ugg1Δ	mns1Δ101Δ	cap59Δ	WT	ugg1Δ	mns1Δ101Δ	cap59Δ
	8.2	5.4	8.32	6.05	5.3	2.22	4.95	3.9
	8.38	4.85	8.1	5.79	6.1	3.5	5.16	2.96
	8.25	4.5	8.04	6.1	6.2	3.8	5.2	4.2
	7.59	4.9	8.2	5.84	5.3	2.05	5.1	3.2
Amylase assay
	WT	ugg1Δ	mns1Δ101Δ	cap59Δ	WT	ugg1Δ	mns1Δ101Δ	cap59Δ
	0.358	0.222	0.25	0.25	0.368	0.238	0.247	0.23
	0.346	0.215	0.273	0.248	0.371	0.235	0.239	0.224
	0.361	0.207	0.269	6.1	0.37	0.23	0.242	0.229
	0.338	0.21	0.297	5.84	0.365	0.234	0.248	0.231
