# Supplementary material for: Evolutionary unique N-glycan-dependent protein quality control system plays pivotal roles in cellular fitness and extracellular vesicle transport in Cryptococcus neoformans
Source: eLife journal article supplement (doi:10.7554/elife.103729), 2024-12-02
Supplement: fig8-data15 [file elife-103729-fig8-data15-v1.zip]

## Sheet: NTA analysis
WT	ugg1Δ	cap59Δ					Merged
0	0	0					Sample	ugg1			Sample	WT			Sample	cap59
0	0	0					Mode [nm]	111.5			Mode [nm]	141.5			Mode [nm]	108.5
0	0	0					Mean [nm]	122			Mean [nm]	269			Mean [nm]	132
0	0	0					Standard deviation [nm]	89			Standard deviation [nm]	170			Concentration [particles/ml]	55500000000
0	0	0					Concentration [particles/ml]	15300000000			Concentration [particles/ml]	26700000000			D10 [nm]	91
0	0	0					D10 [nm]	48			D10 [nm]	130			D50 [nm]	117
0	0	0					D50 [nm]	104			D50 [nm]	169			D90 [nm]	170
0	0	0					D90 [nm]	213			D90 [nm]	494			Valid tracks	12635
0	0	0					Valid tracks	4256			Valid tracks	4498
0	0	0														Scatter 1
0	0	0						Scatter 1				Scatter 1			Sample	cap59_2
0	0	0					Sample	UGGT			Sample	WT			Diluent	Water
0	0.0002	0					Diluent	Water			Diluent	Water			Dilution factor	100
0	0.0549	0					Dilution factor	100			Dilution factor	100			Viscosity [cP]	0.8784
0	5.3425	0					Viscosity [cP]	0.899			Viscosity [cP]	0.9466			Sample temperature [°C]	25.5
0	209.165	0					Sample temperature [°C]	24.5			Sample temperature [°C]	22.3			Capture date	5/2/2024 4:29 PM
0	3972.34	0					Capture date	5/2/2024 3:42 PM			Capture date	5/2/2024 2:35 PM			Capture duration [seconds]	11.5
0	42265.5	0					Capture duration [seconds]	11.5			Capture duration [seconds]	11.5			Capture duration [frames]	750
0	281820	0					Capture duration [frames]	750			Capture duration [frames]	750			Number of captures	5
0	1285388	0					Number of captures	5			Number of captures	2			Laser wavelength [nm]	532nm
0	4295886	0					Laser wavelength [nm]	532nm			Laser wavelength [nm]	532nm			Filter	Light scatter
0	11108238	0					Filter	Light scatter			Filter	Light scatter			Flow rate [µL/min]	1.5
0	23207711	0					Flow rate [µL/min]	1.5			Flow rate [µL/min]	1.5			Distribution type	FTLA
0	40566291	0					Distribution type	FTLA			Distribution type	FTLA			Instrument serial number	MAL1314981
0	61037387	0					Instrument serial number	MAL1314981			Instrument serial number	MAL1314981			Frame rate [fps]	65.0193
0	80936712	0					Frame rate [fps]	65.0193			Frame rate [fps]	65.0193			Camera exposure [ms]	7
0	96475427	0					Camera exposure [ms]	7			Camera exposure [ms]	7			Contrast gain	1
0	105000000	0					Contrast gain	1			Contrast gain	1			Focus capture position	2549
0	106000000	0					Focus capture position	2558			Focus capture position	2549			Software version	1.1.0.6 (Build 20000101.6)
0	101000000	0					Software version	1.1.0.6 (Build 20000101.6)			Software version	1.1.0.6 (Build 20000101.6)
0	91477343	0
0	79597944	0
0	67279338	0
0	55749281	0
0	45672865	0
0	37284702	0
0	30546096	0
0	25277298	0
0	21248922	0
0	18235767	0
0	16043317	0
0	14517404	0
0	13545059	0
0	13051795	0
0	12998352	0
0	13378522	0
0	14218776	0
0	15579978	0
0	17561156	0
0	20304983	0
0	24004237	0
0	28907803	0
0	35323887	0
0	43616939	0
0	54193692	0
0	67473100	0
0	83835723	0
0	104000000	0
0	127000000	0
0	153000000	0
0	182000000	0
0	212000000	0
0	243000000	0.0001
0	272000000	0.0006
0	297000000	0.003
0	317000000	0.0128
0	330000000	0.0516
0	335000000	0.1966
0	332000000	0.7068
0.0001	322000000	2.4043
0.0002	306000000	7.7526
0.0005	285000000	23.7401
0.0013	261000000	69.1595
0.0036	234000000	191.995
0.0096	208000000	508.754
0.0254	183000000	1288.81
0.0655	159000000	3126.07
0.1664	137000000	7270.73
0.4151	118000000	16238.8
1.0169	102000000	34876.1
2.4461	87390033	72125.4
5.7752	75420004	143816
13.379	65427334	276844
30.4005	57161450	515126
67.7281	50379649	927604
147.882	44859846	1618423
316.338	40406896	2739014
662.688	36854584	4501412
1359.05	34064932	7191521
2727.66	31926045	11180515
5356.04	30349321	16932074
10287.1	29266564	25002933
19321.7	28627274	36034339
35484.5	28396281	50732569
63713.7	28551755	69837641
111843	29083594	94080719
191944	29992126	124000000
322080	31287075	161000000
528482	32986703	204000000
848120	35117043	254000000
1331522	37711140	311000000
2045640	40808197	374000000
3076431	44452539	442000000
4530734	48692286	516000000
6536988	53577650	592000000
9244318	59158772	670000000
12819615	65483028	748000000
17442370	72591780	825000000
23297251	80516573	898000000
30564688	89274850	967000000
39409965	98865308	1030000000
49971605	109000000	1080000000
62349946	120000000	1130000000
76596916	132000000	1160000000
92707921	145000000	1190000000
111000000	157000000	1210000000
130000000	170000000	1220000000
151000000	183000000	1210000000
174000000	196000000	1200000000
197000000	208000000	1190000000
221000000	219000000	1160000000
245000000	229000000	1130000000
269000000	238000000	1100000000
292000000	245000000	1060000000
315000000	250000000	1020000000
336000000	252000000	974000000
356000000	253000000	929000000
374000000	252000000	884000000
391000000	248000000	838000000
405000000	242000000	793000000
417000000	234000000	749000000
427000000	225000000	707000000
434000000	214000000	666000000
440000000	202000000	626000000
443000000	189000000	589000000
444000000	176000000	554000000
444000000	162000000	520000000
441000000	149000000	489000000
437000000	135000000	460000000
431000000	122000000	433000000
424000000	110000000	407000000
416000000	97951122	384000000
407000000	87041385	362000000
397000000	76984095	341000000
386000000	67800681	323000000
375000000	59487574	305000000
363000000	52021142	289000000
351000000	45362479	275000000
339000000	39461822	261000000
326000000	34262431	249000000
314000000	29703873	237000000
301000000	25724676	226000000
289000000	22264382	217000000
277000000	19265055	207000000
265000000	16672321	199000000
254000000	14436004	191000000
242000000	12510453	184000000
232000000	10854625	177000000
221000000	9431991	171000000
211000000	8210311	166000000
201000000	7161343	160000000
191000000	6260496	155000000
182000000	5486473	151000000
174000000	4820906	146000000
165000000	4248014	142000000
157000000	3754279	139000000
150000000	3328150	135000000
142000000	2959771	132000000
135000000	2640750	129000000
129000000	2363946	126000000
123000000	2123284	123000000
117000000	1913601	121000000
111000000	1730508	118000000
106000000	1570270	116000000
101000000	1429711	114000000
95888323	1306124	111000000
91344494	1197203	109000000
87042473	1100980	108000000
82970744	1015774	106000000
79118088	940144	104000000
75473620	872858	102000000
72026810	812857	101000000
68767507	759230	99207379
65685948	711194	97749504
62772769	668073	96354231
60019003	629280	95019031
57416084	594310	93741693
54955841	562724	92520280
52630491	534138	91353087
50432634	508219	90238595
48355238	484678	89175442
46391633	463260	88162383
44535497	443743	87198258
42780842	425931	86281966
41122004	409652	85412431
39553626	394754	84588585
38070650	381105	83809338
36668297	368586	83073561
35342058	357093	82380064
34087682	346532	81727578
32901160	336822	81114741
31778713	327890	80540082
30716784	319670	80002007
29712021	312103	79498784
28761269	305138	79028538
27861559	298729	78589235
27010099	292834	78178679
26204259	287416	77794498
25441568	282441	77434144
24719702	277880	77094883
24036475	273705	76773797
23389833	269893	76467779
22777845	266422	76173536
22198695	263273	75887589
21650678	260428	75606282
21132189	257872	75325787
20641724	255591	75042116
20177866	253572	74751135
19739286	251805	74448580
19324733	250279	74130082
18933034	248986	73791186
18563087	247918	73427383
18213855	247068	73034142
17884366	246431	72606947
17573705	246001	72141333
17281014	245775	71632933
17005487	245748	71077524
16746366	245917	70471075
16502942	246282	69809796
16274547	246839	69090195
16060554	247587	68309127
15860375	248527	67463847
15673458	249658	66552064
15499286	250981	65571982
15337372	252496	64522352
15187261	254205	63402509
15048525	256110	62212405
14920764	258213	60952636
14803602	260518	59624457
14696688	263026	58229800
14599692	265743	56771264
14512305	268672	55252110
14434239	271817	53676236
14365225	275185	52048149
14305008	278780	50372919
14253355	282608	48656129
14210044	286676	46903812
14174870	290991	45122384
14147642	295561	43318564
14128180	300392	41499295
14116320	305495	39671657
14111905	310877	37842780
14114793	316549	36019758
14124850	322520	34209560
14141953	328801	32418948
14165986	335404	30654400
14196843	342340	28922040
14234427	349623	27227572
14278648	357265	25576229
14329421	365280	23972722
14386670	373684	22421216
14450324	382490	20925294
14520319	391717	19487953
14596596	401380	18111596
14679098	411497	16798040
14767779	422087	15548529
14862590	433169	14363761
14963493	444764	13243913
15070448	456893	12188682
15183421	469578	11197324
15302381	482842	10268693
15427300	496710	9401296
15558151	511207	8593332
15694911	526359	7842744
15837558	542193	7147265
15986073	558738	6504461
16140436	576024	5911775
16300630	594081	5366565
16466639	612942	4866144
16638449	632639	4407810
16816043	653207	3988873
16999408	674682	3606687
17188529	697100	3258664
17383394	720500	2942299
17583986	744922	2655179
17790292	770405	2394997
18002296	796992	2159560
18219984	824727	1946795
18443337	853654	1754751
18672338	883818	1581604
18906970	915267	1425651
19147211	948049	1285311
19393039	982213	1159124
19644433	1017811	1045742
19901367	1054892	943927
20163815	1093512	852547
20431747	1133721	770567
20705134	1175576	697044
20983943	1219132	631121
21268139	1264443	572022
21557685	1311566	519044
21852540	1360559	471554
22152664	1411478	428979
22458010	1464380	390806
22768532	1519322	356572
23084180	1576361	325862
23404900	1635554	298305
23730637	1696954	273568
24061333	1760619	251354
24396925	1826599	231396
24737349	1894949	213458
25082537	1965717	197327
25432420	2038951	182815
25786923	2114698	169752
26145970	2193000	157990
26509480	2273897	147395
26877370	2357424	137847
27249555	2443615	129241
27625945	2532496	121483
28006447	2624092	114488
28390966	2718419	108183
28779403	2815491	102501
29171655	2915313	97383.4
29567618	3017885	92777.6
29967183	3123199	88637.4
30370238	3231239	84921.6
30776669	3341984	81593.6
31186358	3455400	78621.3
31599183	3571447	75976
32015021	3690076	73632.7
32433745	3811225	71569.1
32855224	3934824	69766.1
33279324	4060792	68206.6
33705910	4189037	66876
34134842	4319454	65761.9
34565978	4451927	64853.5
34999172	4586329	64142
35434276	4722519	63620
35871139	4860343	63281.7
36309607	4999637	63122.9
36749522	5140220	63140.5
37190726	5281903	63332.7
37633055	5424479	63699.2
38076343	5567732	64240.7
38520424	5711433	64959.1
38965126	5855338	65857.6
39410275	5999194	66940.5
39855696	6142735	68213.4
40301209	6285684	69683.1
40746634	6427755	71357.5
41191786	6568649	73246
41636480	6708062	75359.2
42080526	6845679	77709.2
42523734	6981178	80309.5
42965910	7114233	83175.2
43406859	7244510	86323
43846383	7371673	89771.3
44284281	7495383	93540.2
44720352	7615300	97651.9
45154392	7731085	102130
45586195	7842398	107002
46015553	7948905	112296
46442256	8050275	118042
46866094	8146185	124275
47286854	8236318	131030
47704321	8320369	138346
48118280	8398042	146265
48528514	8469055	154832
48934806	8533140	164096
49336936	8590046	174109
49734685	8639538	184924
50127832	8681403	196602
50516157	8715444	209204
50899438	8741489	222797
51277453	8759389	237452
51649981	8769016	253242
52016800	8770271	270247
52377689	8763079	288548
52732427	8747390	308231
53080794	8723184	329388
53422570	8690467	352112
53757537	8649274	376501
54085479	8599665	402657
54406179	8541733	430683
54719424	8475594	460687
55025003	8401394	492779
55322706	8319304	527071
55612325	8229523	563674
55893656	8132274	602704
56166499	8027803	644274
56430654	7916382	688497
56685928	7798302	735484
56932128	7673875	785343
57169069	7543432	838181
57396567	7407320	894097
57614444	7265904	953184
57822527	7119558	1015531
58020648	6968673	1081214
58208643	6813644	1150301
58386355	6654878	1222849
58553633	6492785	1298900
58710332	6327780	1378485
58856311	6160279	1461615
58991440	5990698	1548287
59115593	5819450	1638477
59228651	5646946	1732142
59330504	5473588	1829218
59421048	5299773	1929618
59500187	5125886	2033233
59567835	4952305	2139929
59623912	4779391	2249546
59668347	4607495	2361903
59701078	4436953	2476789
59722052	4268082	2593972
59731224	4101185	2713192
59728559	3936547	2834167
59714030	3774434	2956591
59687622	3615094	3080136
59649325	3458755	3204452
59599144	3305624	3329170
59537088	3155893	3453907
59463181	3009728	3578261
59377452	2867282	3701821
59279942	2728682	3824162
59170703	2594042	3944857
59049793	2463453	4063470
58917284	2336990	4179569
58773254	2214710	4292720
58617793	2096653	4402498
58450999	1982842	4508484
58272981	1873286	4610273
58083855	1767978	4707474
57883748	1666899	4799717
57672795	1570017	4886648
57451141	1477286	4967942
57218939	1388650	5043298
56976350	1304045	5112444
56723543	1223395	5175139
56460696	1146618	5231174
56187995	1073623	5280374
55905633	1004315	5322598
55613809	938591	5357742
55312731	876344	5385736
55002613	817464	5406549
54683675	761838	5420181
54356144	709350	5426671
54020250	659882	5426091
53676233	613315	5418544
53324334	569531	5404166
52964800	528412	5383123
52597883	489838	5355608
52223839	453693	5321839
51842926	419862	5282058
51455408	388231	5236529
51061549	358690	5185532
50661618	331128	5129365
50255885	305441	5068339
49844621	281525	5002774
49428100	259282	4933001
49006597	238615	4859355
48580385	219431	4782175
48149742	201641	4701802
47714941	185159	4618573
47276259	169904	4532826
46833969	155797	4444890
46388345	142764	4355091
45939658	130734	4263743
45488178	119639	4171154
45034174	109415	4077618
44577912	100002	3983418
44119655	91343.2	3888824
43659662	83383.9	3794094
43198191	76073.6	3699469
42735496	69364.6	3605176
42271827	63212.2	3511430
41807429	57574.4	3418426
41342544	52411.9	3326347
40877411	47687.9	3235362
40412261	43368.4	3145621
39947324	39421.2	3057264
39482822	35816.6	2970413
39018974	32527.1	2885179
38555992	29527	2801660
38094084	26792.5	2719938
37633452	24301.5	2640085
37174292	22033.7	2562163
36716796	19970.2	2486221
36261148	18093.7	2412298
35807526	16388	2340424
35356105	14838.4	2270621
34907051	13431.3	2202901
34460525	12154.2	2137270
34016682	10995.7	2073726
33575672	9945.1	2012262
33137637	8992.82	1952864
32702714	8129.99	1895515
32271034	7348.5	1840190
31842722	6640.96	1786864
31417895	6000.57	1735506
30996668	5421.16	1686082
30579148	4897.09	1638558
30165434	4423.2	1592894
29755624	3994.81	1549051
29349805	3607.66	1506988
28948063	3257.85	1466664
28550476	2941.85	1428033
28157117	2656.45	1391055
27768054	2398.75	1355684
27383349	2166.08	1321876
27003060	1956.05	1289590
26627240	1766.48	1258780
26255935	1595.4	1229406
25889188	1441.02	1201424
25527039	1301.72	1174793
25169519	1176.04	1149475
24816659	1062.64	1125428
24468484	960.339	1102616
24125013	868.041	1081002
23786265	784.771	1060549
23452251	709.643	1041223
23122982	641.859	1022992
22798462	580.697	1005823
22478694	525.506	989686
22163676	475.699	974553
21853404	430.745	960395
21547870	390.166	947186
21247064	353.532	934903
20950973	320.453	923520
20659580	290.579	913017
20372867	263.596	903372
20090813	239.216	894567
19813394	217.186	886583
19540585	197.273	879405
19272358	179.27	873016
19008684	162.989	867402
18749531	148.26	862552
18494866	134.933	858454
18244654	122.869	855098
17998859	111.946	852474
17757442	102.052	850576
17520365	93.0873	849396
17287587	84.9611	848929
17059066	77.5924	849172
16834761	70.9078	850121
16614628	64.8414	851774
16398621	59.3335	854130
16186697	54.3307	857189
15978808	49.7846	860954
15774909	45.6515	865425
15574952	41.8921	870606
15378889	38.471	876502
15186674	35.3563	883117
14998256	32.5189	890457
14813588	29.9329	898530
14632621	27.5748	907344
14455305	25.4233	916906
14281591	23.4593	927227
14111429	21.6654	938317
13944771	20.0259	950186
13781568	18.5267	962847
13621769	17.155	976312
13465325	15.8993	990593
13312188	14.749	1005704
13162309	13.6946	1021660
13015639	12.7276	1038474
12872129	11.8402	1056163
12731732	11.0253	1074740
12594399	10.2766	1094221
12460084	9.5882	1114623
12328738	8.9549	1135961
12200316	8.3719	1158251
12074771	7.8349	1181508
11952056	7.34	1205749
11832127	6.8835	1230988
11714939	6.4623	1257241
11600446	6.0733	1284522
11488605	5.7138	1312846
11379372	5.3815	1342225
11272703	5.0741	1372671
11168557	4.7896	1404197
11066892	4.526	1436812
10967664	4.2818	1470524
10870835	4.0553	1505342
10776362	3.8452	1541271
10684207	3.6502	1578314
10594329	3.4691	1616474
10506690	3.3007	1655750
10421251	3.1443	1696140
10337975	2.9988	1737637
10256824	2.8634	1780236
10177761	2.7374	1823923
10100750	2.62	1868686
10025757	2.5107	1914506
9952744	2.4089	1961363
9881678	2.314	2009233
9812525	2.2255	2058087
9745250	2.1431	2107893
9679821	2.0662	2158614
9616205	1.9946	2210209
9554369	1.9278	2262633
9494283	1.8655	2315836
9435915	1.8075	2369764
9379233	1.7535	2424357
9324208	1.7032	2479552
9270810	1.6564	2535279
9219009	1.613	2591465
9168776	1.5726	2648032
9120082	1.5352	2704895
9072900	1.5005	2761968
9027200	1.4685	2819157
8982957	1.4389	2876365
8940141	1.4118	2933491
8898727	1.3869	2990429
8858689	1.3641	3047070
8819998	1.3434	3103301
8782631	1.3247	3159004
8746561	1.3078	3214062
8711763	1.2928	3268351
8678212	1.2796	3321748
8645882	1.2681	3374127
8614751	1.2583	3425359
8584792	1.2501	3475318
8555982	1.2434	3523874
8528297	1.2384	3570899
8501713	1.2349	3616265
8476207	1.2329	3659847
8451755	1.2325	3701520
8428334	1.2336	3741161
8405920	1.2361	3778654
8384492	1.2402	3813881
8364025	1.2458	3846734
8344496	1.2529	3877105
8325884	1.2616	3904894
8308165	1.2719	3930008
8291317	1.2838	3952358
8275317	1.2973	3971862
8260143	1.3125	3988449
8245771	1.3294	4002052
8232180	1.3481	4012614
8219347	1.3687	4020087
8207249	1.3912	4024431
8195863	1.4157	4025617
8185167	1.4422	4023622
8175138	1.4709	4018438
8165753	1.5018	4010061
8156990	1.5351	3998500
8148825	1.5708	3983774
8141235	1.6092	3965909
8134198	1.6503	3944945
8127689	1.6942	3920926
8121685	1.7411	3893910
8116163	1.7913	3863961
8111099	1.8448	3831151
8106470	1.9019	3795563
8102250	1.9628	3757285
8098416	2.0277	3716414
8094944	2.0968	3673053
8091809	2.1705	3627310
8088987	2.2489	3579302
8086451	2.3325	3529147
8084178	2.4215	3476970
8082143	2.5163	3422900
8080319	2.6173	3367067
8078681	2.7248	3309606
8077203	2.8394	3250652
8075859	2.9615	3190343
8074623	3.0916	3128817
8073469	3.2302	3066212
8072370	3.3781	3002665
8071298	3.5357	2938313
8070228	3.7038	2873291
8069132	3.8831	2807731
8067983	4.0745	2741764
8066753	4.2788	2675518
8065415	4.4968	2609114
8063941	4.7297	2542675
8062302	4.9785	2476315
8060472	5.2444	2410145
8058422	5.5286	2344273
8056123	5.8324	2278799
8053548	6.1574	2213820
8050668	6.5051	2149427
8047455	6.8771	2085705
8043880	7.2754	2022734
8039914	7.7018	1960590
8035531	8.1586	1899339
8030700	8.648	1839047
8025393	9.1725	1779769
8019583	9.7347	1721558
8013241	10.3376	1664461
8006339	10.9842	1608520
7998850	11.678	1553769
7990744	12.4225	1500241
7981995	13.2216	1447961
7972576	14.0796	1396952
7962459	15.001	1347230
7951617	15.9908	1298809
7940025	17.0541	1251696
7927655	18.1968	1205898
7914483	19.4251	1161416
7900483	20.7455	1118247
7885629	22.1653	1076386
7869899	23.6922	1035826
7853267	25.3346	996555
7835710	27.1015	958561
7817207	29.0025	921827
7797734	31.0483	886336
7777270	33.2501	852069
7755795	35.62	819004
7733288	38.1712	787119
7709731	40.9179	756390
7685105	43.8753	726792
7659392	47.0599	698299
7632576	50.4892	670884
7604641	54.1824	644519
7575572	58.16	619178
7545355	62.4439	594831
7513978	67.0581	571450
7481430	72.0279	549006
7447698	77.381	527471
7412774	83.1467	506816
7376650	89.357	487012
7339318	96.0457	468032
7300772	103.25	449847
7261008	111.008	432430
7220022	119.364	415753
7177812	128.361	399790
7134377	138.049	384514
7089718	148.48	369900
7043836	159.71	355922
6996735	171.798	342557
6948418	184.809	329780
6898893	198.811	317568
6848167	213.878	305898
6796247	230.089	294749
6743146	247.526	284099
6688873	266.281	273928
6633442	286.449	264215
6576867	308.132	254943
6519165	331.44	246091
6460352	356.488	237643
6400447	383.402	229581
6339471	412.314	221889
6277444	443.364	214550
6214390	476.702	207550
6150332	512.488	200873
6085296	550.891	194506
6019308	592.091	188436
5952397	636.28	182649
5884591	683.659	177132
5815921	734.445	171875
5746419	788.865	166866
5676116	847.161	162094
5605047	909.587	157548
5533247	976.414	153219
5460750	1047.93	149098
5387594	1124.43	145176
5313816	1206.23	141444
5239454	1293.68	137893
5164547	1387.12	134517
5089136	1486.93	131308
5013260	1593.5	128259
4936960	1707.24	125363
4860279	1828.58	122614
4783259	1957.97	120006
4705940	2095.9	117534
4628368	2242.86	115192
4550583	2399.38	112975
4472631	2565.99	110878
4394554	2743.28	108896
4316395	2931.83	107026
4238199	3132.27	105264
4160009	3345.25	103605
4081868	3571.45	102046
4003819	3811.56	100583
3925905	4066.32	99213.8
3848168	4336.49	97934.9
3770652	4622.85	96743.6
3693397	4926.22	95637.2
3616445	5247.45	94613.5
3539836	5587.4	93670
3463611	5946.99	92804.6
3387809	6327.13	92015.5
3312468	6728.8	91300.8
3237626	7152.98	90658.8
3163319	7600.69	90088
3089585	8072.97	89587.1
3016458	8570.9	89154.9
2943972	9095.57	88790.1
2872160	9648.11	88491.7
2801054	10229.7	88259
2730685	10841.4	88091.1
2661082	11484.6	87987.4
2592274	12160.4	87947.3
2524287	12870	87970.4
2457149	13614.8	88056.3
2390884	14396	88204.9
2325514	15214.8	88416.1
2261063	16072.7	88689.7
2197551	16970.9	89025.9
2134997	17910.8	89424.7
2073419	18893.8	89886.6
2012835	19921	90411.8
1953259	20994.1	91000.8
1894706	22114.2	91654
1837188	23282.8	92372.2
1780717	24501.1	93156
1725303	25770.7	94006.2
1670954	27092.7	94923.6
1617678	28468.6	95909.4
1565480	29899.7	96964.4
1514367	31387.2	98089.9
1464340	32932.6	99286.9
1415403	34536.9	100557
1367556	36201.5	101901
1320800	37927.6	103321
1275133	39716.4	104818
1230552	41569.1	106394
1187056	43486.6	108051
1144638	45470.2	109790
1103293	47520.9	111612
1063015	49639.7	113521
1023797	51827.5	115517
985630	54085.2	117604
948504	56413.7	119782
912410	58813.8	122054
877337	61286.3	124422
843273	63831.8	126889
810206	66450.9	129456
778123	69144.4	132126
747010	71912.6	134902
716853	74756.1	137785
687637	77675.2	140778
659348	80670.3	143883
631969	83741.7	147103
605484	86889.6	150440
579877	90114.1	153897
555130	93415.4	157476
531228	96793.5	161179
508152	100248	165009
485884	103780	168967
464407	107388	173056
443703	111072	177279
423754	114833	181637
404542	118669	186132
386048	122581	190766
368254	126569	195540
351141	130630	200457
334692	134767	205517
318889	138977	210722
303713	143260	216073
289146	147616	221570
275170	152044	227214
261768	156544	233006
248922	161115	238945
236616	165757	245030
224830	170468	251262
213550	175249	257640
202758	180099	264161
192438	185017	270825
182573	190003	277628
173149	195056	284569
164149	200176	291644
155558	205362	298850
147361	210615	306183
139544	215933	313637
132092	221317	321208
124992	226767	328891
118230	232282	336678
111792	237862	344562
105666	243508	352537
99839.4	249220	360594
94299.7	254997	368724
89035.2	260842	376918
84034.3	266753	385165
79285.9	272732	393455
74779	278780	401776
70503.4	284898	410116
66448.7	291087	418462
62605.2	297347	426801
58963.3	303681	435118
55514.1	310091	443399
52248.5	316577	451628
49158.2	323143	459790
46234.8	329790	467868
43470.4	336522	475845
40857.6	343340	483703
38388.9	350247	491425
36057.3	357248	498992
33856.1	364345	506386
31778.8	371542	513588
29819.2	378843	520578
27971.4	386252	527337
26229.5	393775	533846
24588.3	401416	540086
23042.4	409180	546037
21586.8	417073	551680
20216.9	425100	556996
18928	433270	561967
17715.8	441587	566574
16576.1	450059	570799
15505	458695	574626
14498.8	467502	578037
13553.8	476488	581018
12666.6	485662	583553
11834	495036	585629
11052.9	504617	587232
10320.3	514418	588351
9633.54	524449	588975
8989.91	534722	589096
8386.91	545251	588704
7822.17	556048	587794
7293.44	567128	586361
6798.57	578506	584400
6335.56	590197	581912
5902.49	602218	578893
5497.56	614587	575348
5119.05	627322	571277
4765.36	640443	566686
4434.96	653971	561583
4126.4	667927	555973
3838.35	682336	549869
3569.5	697221	543280
3318.67	712609	536220
3084.7	728528	528704
2866.53	745006	520748
2663.16	762074	512369
2473.62	779766	503587
2297.04	798117	494422
2132.57	817162	484895
1979.43	836943	475029
1836.87	857499	464848
1704.19	878877	454376
1580.75	901122	443640
1465.94	924284	432664
1359.17	948419	421475
1259.91	973581	410101
1167.66	999832	398568
1081.94	1027236	386905
1002.31	1055863	375138
928.351	1085785	363296
859.683	1117082	351404
795.94	1149837	339491
736.782	1184141	327582
681.893	1220088	315703
630.976	1257783	303879
583.755	1297335	292135
539.971	1338863	280494
499.382	1382493	268977
461.764	1428362	257607
426.908	1476616	246404
394.616	1527411	235386
364.707	1580918	224572
337.01	1637318	213977
311.367	1696808	203616
287.63	1759597	193504
265.663	1825916	183652
245.336	1896009	174072
226.531	1970142	164773
209.137	2048602	155762
193.052	2131701	147047
178.179	2219774	138633
164.43	2313186	130523
151.722	2412332	122722
139.977	2517640	115229
129.126	2629575	108046
119.101	2748643	101171
109.841	2875393	94603.3
101.289	3010423	88339.6
93.3923	3154384	82376
86.1016	3307987	76708
79.3713	3472005	71330.1
73.1593	3647283	66236.2
67.4266	3834744	61419.6
62.1369	4035398	56872.8
57.2565	4250349	52588.1
52.7545	4480806	48557.1
48.602	4728096	44771.3
44.7724	4993673	41221.7
41.241	5279134	37899.2
37.985	5586234	34794.5
34.9833	5916903	31898.2
32.2162	6273264	29200.8
29.6659	6657660	26692.8
27.3154	7072671	24364.9
25.1495	7521146	22207.7
23.1537	8006233	20212.1
21.315	8531412	18369
19.6211	9100535	16669.6
18.0608	9717869	15105.2
16.6236	10388145	13667.6
15.3	11116614	12348.7
14.0811	11909110	11140.6
12.9587	12772120	10036
11.9252	13712865	9027.49
10.9737	14739388	8108.35
10.0978	15860661	7272.02
9.2914	17086700	6512.3
8.5491	18428697	5823.29
7.8659	19899170	5199.46
7.2371	21512138	4635.55

## Sheet: Total EV production
WT	uggtΔ	cap59Δ
10	7.75	23.85
13.35	7.65	27.75
8.25	1.53	18.65
16.6	8.15	20.25
10.8	5.85	28.55
	0
