# Supplementary material for: Evolutionary unique N-glycan-dependent protein quality control system plays pivotal roles in cellular fitness and extracellular vesicle transport in Cryptococcus neoformans
Source: eLife journal article supplement (doi:10.7554/elife.103729), 2024-12-02
Supplement: fig8-data15 [file Figure 8D - EV diameter raw data.xlsx]

## Sheet: Sheet1
WT	ugg1Δ	cap59Δ
178.194	71.429	109.322
202.645	45.245	78.786
186.016	64.937	127.636
211.486	82.31	79.248
261.854	109.974	150.337
50.088	98.445	83.962
159.204	69.875	92.927
197.061	140.573	135.538
64.922	65.082	90.508
149.458	49.145	152.026
111.522	48.356	111.543
217.147	109.461	124.003
145.625	46.727	113.06
110.335	43.249	141.138
119.487	39.467	116.326
220.508	197.849	154.168
105.175	66.425	80.778
138.297	68.226	125.218
318.996	113.683	106.191
220.941	62.398	157.941
301.425	42.495	185.136
127.24	106.881	81.666
121.654	47.992	97.719
93.887	66.816	159.081
120.548	60.165	348.326
116.735	248.429	171.782
191.625	137.508	105.427
123.917	58.806	120.979
320.865	62.546	167.16
117.428	42.024	80.699
91.913	48.866	159.054
90.74	61.949	60.426
117.831	281.279	116.314
120.717	55.448	99.193
123.081	140.502	116.245
156.946	85.01	101.655
122.403	85.415	114.234
215.375	64.464	156.099
119.579	72.094	149.051
129.8	75.228	140.258
113.221	119.872	128.761
133.864	113.938	124
81.446	86.104	179.505
121.966	112.254	155.254
326.669	82.218	149.028
345.459	99.625	152.501
125.115	115.456	198.254
121.303	80.905	159.621
159.862	65.55	177.682
124.188	63.138	153.642
186.556	46.337	135.25
110.741	49.406	152.086
126.5	275.429	120.002
131.668	148.721	117.995
110.904	42.441	125.037
278.656	66.139	149.056
221.704	79.384	131.257
120.999	425.101	142.253
117.492	68.24	139.25
132.588	47.938	125.375
125.011	80.467	124.09
181.361	51.71	120.981
120.019	117.286	120.248
120.169	52.237	150.256
316.42	110.28	120.27
119.554	52.34	118.507
125.865	87.521	135.545
152.607	68.471	165.2
120.901	125.338	129.507
278.515	50.126	139.22
120.956	67.484	150.038
129.031	118.116	136.1
134.867	53.248	115.944
225.066	66.912	135.025
118.034	151.097	125.901
215.377	84.864	113.25
530.056	63.009	146.237
128.891	125.805	130.551
154.202	54.095	131.025
206.237	31.362	152.297
154.31	174.888	132.585
164.345	64.227	134.052
123.835	112.219	121.138
116.601	48.1	125.356
202.302	80.02	118.124
135.093	143.074	151.095
154.059	147.633	124.567
148.821	128.94	116.428
144.626	78.873	158.94
112.303	40.576	133.26
125.859	176.35	143.253
172.659	47.348	137.654
119.498	66.917	119.651
131.817	51.709	130.025
159.265	135.133	152.34
108.889	117.426	128.354
484.864	104.21	117.259
159.156	82.009	128.524
166.25	56.704	121.561
190.537	48.988	134.455
