# Supplementary material for: Evolutionary unique N-glycan-dependent protein quality control system plays pivotal roles in cellular fitness and extracellular vesicle transport in Cryptococcus neoformans
Source: eLife. 2025 May 27;13:RP103729. doi: 10.7554/eLife.103729 (PMC12113280; doi:10.7554/eLife.103729)
Supplement: Figure 8—source data 1. [file elife-103729-fig8-data1.xlsx]

## Sheet: EV
List of proteins identified in the proteomic analysis of the wild type (WT) and ugg1Δ extracellular vesicles (EVs) and whole-cell lysates (WCL)
protein	comparison	True	Levene_P	ttest_P	Class1	Class2	Difference	id	Fold change	Gene locus	Gene ID	Protein	BP	CC	MF
J9VSN1	WT:uggt	TRUE	0.1	0.0688279	-2.83171	-2.09022	0.741494	0	1.67191	CNAG_01408		PH and SEC7 domain-containing protein	regulation of ARF protein signal transduction [GO:0032012]		guanyl-nucleotide exchange factor activity [GO:0005085]
J9VJD3	WT:uggt	TRUE	0.2	0.244978	3.59482	3.75823	0.163415	0	1.11994	CNAG_00584		Profilin	sequestering of actin monomers [GO:0042989]	cell cortex [GO:0005938]; cytoskeleton [GO:0005856]	actin monomer binding [GO:0003785]
J9VTT2	WT:uggt	TRUE	0.1	0.0254605	2.51574	2.14088	-0.374857	0	0.771182	CNAG_01647	SEC66	Translocation protein SEC66	post-translational protein targeting to membrane, translocation [GO:0031204]	Sec62/Sec63 complex [GO:0031207]
J9VVP1	WT:uggt	TRUE	0.7	0.756947	1.17459	1.07721	-0.0973878	0	0.934724	CNAG_03459		T-complex protein 1 subunit delta		chaperonin-containing T-complex [GO:0005832]	ATP binding [GO:0005524]; ATP hydrolysis activity [GO:0016887]; ATP-dependent protein folding chaperone [GO:0140662]; unfolded protein binding [GO:0051082]
J9VME1	WT:uggt	TRUE	0.1	0.0051906	4.48894	5.13726	0.648314	0	1.56734	CNAG_00730	AFR1	ABC multidrug transporter AFR1		plasma membrane [GO:0005886]	ABC-type transporter activity [GO:0140359]; ATP binding [GO:0005524]; ATP hydrolysis activity [GO:0016887]
J9VY02	WT:uggt	TRUE	0.7	0.997346	-0.408464	-0.409131	-0.000667312	0	0.999538	CNAG_06067		CN hydrolase domain-containing protein	beta-alanine biosynthetic process via 3-ureidopropionate [GO:0033396]; putrescine biosynthetic process from arginine [GO:0033388]		beta-ureidopropionase activity [GO:0003837]; N-carbamoylputrescine amidase activity [GO:0050126]
J9VIE2	WT:uggt	TRUE	0.1	0.00413509	-0.230666	-1.16729	-0.936622	0	0.522455	CNAG_04951		Phospho-2-dehydro-3-deoxyheptonate aldolase (EC 2.5.1.54)	amino acid biosynthetic process [GO:0008652]; aromatic amino acid family biosynthetic process [GO:0009073]	cytoplasm [GO:0005737]	3-deoxy-7-phosphoheptulonate synthase activity [GO:0003849]
J9VNN2	WT:uggt	TRUE	0.2	0.120532	0.502507	-0.0568981	-0.559405	0	0.678582	CNAG_04948		Tubulin beta chain	microtubule cytoskeleton organization [GO:0000226]; mitotic cell cycle [GO:0000278]	cytoplasm [GO:0005737]; microtubule [GO:0005874]	GTP binding [GO:0005525]; GTPase activity [GO:0003924]; structural constituent of cytoskeleton [GO:0005200]
J9VMD3	WT:uggt	TRUE	0.1	0.000253205	3.79109	4.60788	0.816786	0	1.76148	CNAG_02928		Large subunit ribosomal protein L5e	translation [GO:0006412]	cytosolic large ribosomal subunit [GO:0022625]	5S rRNA binding [GO:0008097]; structural constituent of ribosome [GO:0003735]
J9VXH5	WT:uggt	TRUE	0.1	0.0464664	4.19816	3.86772	-0.330437	0	0.795296	CNAG_04883		Small subunit ribosomal protein S18	translation [GO:0006412]	cytosol [GO:0005829]; small ribosomal subunit [GO:0015935]	RNA binding [GO:0003723]; structural constituent of ribosome [GO:0003735]
J9VLM3	WT:uggt	TRUE	0.1	0.00275664	2.87932	2.11238	-0.76694	0	0.587663	CNAG_03974		NmrA-like domain-containing protein		nucleus [GO:0005634]
J9VZE3	WT:uggt	TRUE	0.1	0.000706926	1.55499	0.64015	-0.914836	0	0.530404	CNAG_01823	INM1	Inositol-1-monophosphatase (EC 3.1.3.25)	inositol biosynthetic process [GO:0006021]; phosphatidylinositol phosphate biosynthetic process [GO:0046854]; signal transduction [GO:0007165]		inositol monophosphate 1-phosphatase activity [GO:0008934]; inositol monophosphate 3-phosphatase activity [GO:0052832]; inositol monophosphate 4-phosphatase activity [GO:0052833]; metal ion binding [GO:0046872]
J9VXK4	WT:uggt	TRUE	0.1	0.0413983	6.76741	7.1407	0.37329	0	1.2953	CNAG_05556		60S ribosomal protein L38	protein-RNA complex assembly [GO:0022618]; translation [GO:0006412]	cytosolic large ribosomal subunit [GO:0022625]	structural constituent of ribosome [GO:0003735]
J9W0Z8	WT:uggt	TRUE	0.1	0.001735	-0.546775	0.150342	0.697117	0	1.62126	CNAG_01535		Amino acid permease		membrane [GO:0016020]	transmembrane transporter activity [GO:0022857]
J9VUF9	WT:uggt	TRUE	0.1	9.21921e-05	6.55198	6.0586	-0.49338	0	0.710359	CNAG_01896		Alcohol dehydrogenase (NADP )		cytosol [GO:0005829]	aldose reductase (NADPH) activity [GO:0004032]
J9VZI7	WT:uggt	TRUE	0.1	0.0351761	4.03273	3.16482	-0.867907	0	0.547941	CNAG_04445		40S ribosomal protein S7	ribosomal small subunit biogenesis [GO:0042274]; rRNA processing [GO:0006364]; translation [GO:0006412]	90S preribosome [GO:0030686]; cytosolic small ribosomal subunit [GO:0022627]; small-subunit processome [GO:0032040]	structural constituent of ribosome [GO:0003735]
J9VR87	WT:uggt	TRUE	0.7	0.36863	2.48839	2.24235	-0.246038	0	0.843209	CNAG_04969	UGD1	UDP-glucose 6-dehydrogenase (EC 1.1.1.22)	glycosaminoglycan biosynthetic process [GO:0006024]; UDP-glucuronate biosynthetic process [GO:0006065]	nucleus [GO:0005634]	NAD binding [GO:0051287]; UDP-glucose 6-dehydrogenase activity [GO:0003979]
J9VQ77	WT:uggt	TRUE	0.1	0.00374489	0.66891	0.324543	-0.344367	0	0.787653	CNAG_02833		NADH dehydrogenase [ubiquinone] 1 beta subcomplex subunit 7		mitochondrial intermembrane space [GO:0005758]; mitochondrial respiratory chain complex I [GO:0005747]
J9VXY1	WT:uggt	TRUE	0.1	0.0313617	-2.26233	-2.67443	-0.412106	0	0.751525	CNAG_03345		DIS3-like exonuclease 2 (EC 3.1.13.-)	miRNA catabolic process [GO:0010587]; polyuridylation-dependent mRNA catabolic process [GO:1990074]	cytosol [GO:0005829]; P-body [GO:0000932]	3'-5'-RNA exonuclease activity [GO:0000175]; metal ion binding [GO:0046872]; RNA binding [GO:0003723]
J9VY76	WT:uggt	TRUE	0.1	0.00312623	3.86274	3.02339	-0.839354	0	0.558894	CNAG_06140	ACB1	Long-chain fatty acid transporter	fatty acid metabolic process [GO:0006631]	cytoplasm [GO:0005737]	fatty-acyl-CoA binding [GO:0000062]
J9VF36	WT:uggt	TRUE	0.4	0.153933	-3.24731	-4.03033	-0.783018	0	0.58115	CNAG_00567		methylated diphthine methylhydrolase (EC 3.1.1.97)	protein histidyl modification to diphthamide [GO:0017183]	cytoplasm [GO:0005737]	diphthine methylesterase activity [GO:0061685]
J9VMK3	WT:uggt	TRUE	0.1	0.0146481	1.16947	0.437881	-0.731594	0	0.602238	CNAG_00760		Methylenetetrahydrofolate reductase	methionine biosynthetic process [GO:0009086]; tetrahydrofolate interconversion [GO:0035999]	cytosol [GO:0005829]	FAD binding [GO:0071949]; methylenetetrahydrofolate reductase (NAD(P)H) activity [GO:0004489]
J9VR74	WT:uggt	TRUE	0.1	0.0145384	2.22394	2.03232	-0.191617	0	0.875624	CNAG_03554		Coatomer subunit alpha	endoplasmic reticulum to Golgi vesicle-mediated transport [GO:0006888]; intra-Golgi vesicle-mediated transport [GO:0006891]; intracellular protein transport [GO:0006886]; retrograde vesicle-mediated transport, Golgi to endoplasmic reticulum [GO:0006890]	COPI vesicle coat [GO:0030126]; Golgi membrane [GO:0000139]	structural molecule activity [GO:0005198]
J9VW74	WT:uggt	TRUE	0.1	0.0130596	-0.248613	-1.08379	-0.835175	0	0.560515	CNAG_06645		Methylenetetrahydrofolate dehydrogenase (NAD )	purine nucleobase biosynthetic process [GO:0009113]; tetrahydrofolate interconversion [GO:0035999]	cytosol [GO:0005829]	methenyltetrahydrofolate cyclohydrolase activity [GO:0004477]; methylenetetrahydrofolate dehydrogenase (NAD+) activity [GO:0004487]; methylenetetrahydrofolate dehydrogenase (NADP+) activity [GO:0004488]
J9VEM7	WT:uggt	TRUE	0.1	0.0167706	1.58433	2.14414	0.559813	0	1.47408	CNAG_00668		Mid2 domain-containing protein		cell periphery [GO:0071944]; membrane [GO:0016020]
J9VGC1	WT:uggt	TRUE	0.1	0.0558546	1.16188	1.58869	0.426814	0	1.34426	CNAG_03688		Uncharacterized protein
J9VJT0	WT:uggt	TRUE	0.7	0.6616	1.51069	1.54183	0.0311424	0	1.02182	CNAG_05218		Adenylyl cyclase-associated protein	actin filament organization [GO:0007015]; cAMP-mediated signaling [GO:0019933]; cell morphogenesis [GO:0000902]	cytoplasm [GO:0005737]	actin binding [GO:0003779]; adenylate cyclase binding [GO:0008179]
J9VG04	WT:uggt	TRUE	0.1	0.0433134	2.61885	1.79067	-0.828175	0	0.563241	CNAG_00139		GST N-terminal domain-containing protein			glutathione transferase activity [GO:0004364]
J9VW13	WT:uggt	TRUE	0.4	0.122578	3.48625	3.15688	-0.32938	0	0.795879	CNAG_04609		Argonaute	regulatory ncRNA-mediated post-transcriptional gene silencing [GO:0035194]	cytoplasm [GO:0005737]	miRNA binding [GO:0035198]; RNA endonuclease activity [GO:0004521]; single-stranded RNA binding [GO:0003727]
J9VVE2	WT:uggt	TRUE	0.1	0.0306702	-1.21517	-0.425678	0.789492	0	1.72847	CNAG_02134		Chromatin remodeling-related protein	positive regulation of DNA-templated transcription [GO:0045893]	nBAF complex [GO:0071565]; npBAF complex [GO:0071564]; SWI/SNF complex [GO:0016514]	histone binding [GO:0042393]; nucleosomal DNA binding [GO:0031492]; zinc ion binding [GO:0008270]
J9VK61	WT:uggt	TRUE	0.1	1.34738e-05	3.72428	2.91985	-0.804425	0	0.57259	CNAG_00848		LEA domain protein
J9VNN5	WT:uggt	TRUE	0.7	0.632656	-0.71206	-0.63683	0.0752299	0	1.05353	CNAG_06577		Uncharacterized protein
J9VTL0	WT:uggt	TRUE	0.1	0.0443115	1.57255	1.22282	-0.349732	0	0.78473	CNAG_01091		U5 small nuclear ribonucleoprotein component	mRNA splicing, via spliceosome [GO:0000398]	cytosol [GO:0005829]; U2-type catalytic step 2 spliceosome [GO:0071007]; U4/U6 x U5 tri-snRNP complex [GO:0046540]	GTP binding [GO:0005525]; GTPase activity [GO:0003924]; U5 snRNA binding [GO:0030623]
J9VLL9	WT:uggt	TRUE	0.1	0.0577227	-0.314049	-0.895122	-0.581073	0	0.668466	CNAG_05077		Glycosyl hydrolase	carbohydrate metabolic process [GO:0005975]		hydrolase activity, hydrolyzing O-glycosyl compounds [GO:0004553]
J9W0Y5	WT:uggt	TRUE	0.1	0.0442054	-2.21309	-3.12109	-0.908	0	0.532923	CNAG_01520		type I protein arginine methyltransferase (EC 2.1.1.319)	chromatin organization [GO:0006325]; methylation [GO:0032259]	cytoplasm [GO:0005737]; nucleus [GO:0005634]	protein-arginine N-methyltransferase activity [GO:0016274]
J9W2J0	WT:uggt	TRUE	0.4	0.286749	7.68209	8.04918	0.367091	0	1.28975	CNAG_06125		Elongation factor 1-alpha	sulfur compound metabolic process [GO:0006790]	cytoplasm [GO:0005737]	GTP binding [GO:0005525]; GTPase activity [GO:0003924]; translation elongation factor activity [GO:0003746]
J9VSX5	WT:uggt	TRUE	0.1	0.0595246	4.1577	4.4053	0.247595	0	1.18723	CNAG_02100		Fatty acid synthase subunit alpha, fungi type	long-chain fatty acid biosynthetic process [GO:0042759]	fatty acid synthase complex [GO:0005835]	3-oxoacyl-[acyl-carrier-protein] reductase (NADPH) activity [GO:0004316]; 3-oxoacyl-[acyl-carrier-protein] synthase activity [GO:0004315]; fatty acid synthase activity [GO:0004312]; holo-[acyl-carrier-protein] synthase activity [GO:0008897]; magnesium ion binding [GO:0000287]
J9VT31	WT:uggt	TRUE	0.1	0.0119504	4.2362	3.26314	-0.973056	0	0.509426	CNAG_02035		Triosephosphate isomerase (EC 5.3.1.1)	gluconeogenesis [GO:0006094]; glyceraldehyde-3-phosphate biosynthetic process [GO:0046166]; glycerol catabolic process [GO:0019563]; glycolytic process [GO:0006096]	cytosol [GO:0005829]	triose-phosphate isomerase activity [GO:0004807]
J9VTW1	WT:uggt	TRUE	0.1	0.000278743	1.73409	0.812443	-0.921644	0	0.527907	CNAG_01492		6-phosphogluconate dehydrogenase NADP-binding domain-containing protein		cytosol [GO:0005829]	3-hydroxybutyrate dehydrogenase activity [GO:0003858]; methylated histone binding [GO:0035064]; NAD binding [GO:0051287]; NADP binding [GO:0050661]
J9VIA8	WT:uggt	TRUE	0.7	0.96912	-0.488423	-0.468271	0.0201519	0	1.01407	CNAG_03638		Heterokaryon incompatibility protein HET-C
J9VHF9	WT:uggt	TRUE	0.1	0.0055565	-1.33003	-0.34967	0.980359	0	1.97296	CNAG_02850	AGN1	Glucan endo-1,3-alpha-glucosidase agn1			glucan endo-1,3-alpha-glucosidase activity [GO:0051118]
J9VHS3	WT:uggt	TRUE	0.1	0.129234	-1.21833	-1.95503	-0.736698	0	0.600111	CNAG_02717		Aryl-alcohol dehydrogenase		cytosol [GO:0005829]
J9VN49	WT:uggt	TRUE	0.2	0.165655	-2.90905	-3.58617	-0.677111	0	0.625416	CNAG_01271		Pre-mRNA-splicing factor ISY1	generation of catalytic spliceosome for second transesterification step [GO:0000350]; mRNA 3'-splice site recognition [GO:0000389]	catalytic step 2 spliceosome [GO:0071013]; post-mRNA release spliceosomal complex [GO:0071014]; post-spliceosomal complex [GO:0071020]; Prp19 complex [GO:0000974]
J9W0H5	WT:uggt	TRUE	0.1	0.000672731	0.368738	0.989383	0.620645	0	1.53756	CNAG_06216		Uncharacterized protein		extracellular region [GO:0005576]	oxidoreductase activity, acting on a sulfur group of donors, disulfide as acceptor [GO:0016671]
J9VLV1	WT:uggt	TRUE	1	0.650687	0.897412	0.97322	0.0758086	0	1.05395	CNAG_04074		Coatomer subunit beta'	endoplasmic reticulum to Golgi vesicle-mediated transport [GO:0006888]; intra-Golgi vesicle-mediated transport [GO:0006891]; intracellular protein transport [GO:0006886]; retrograde vesicle-mediated transport, Golgi to endoplasmic reticulum [GO:0006890]	COPI vesicle coat [GO:0030126]; Golgi membrane [GO:0000139]	structural molecule activity [GO:0005198]
J9VM05	WT:uggt	TRUE	0.1	0.000178267	1.9814	1.30643	-0.674972	0	0.626345	CNAG_02326		V-type proton ATPase catalytic subunit A (EC 7.1.2.2)		endomembrane system [GO:0012505]; fungal-type vacuole membrane [GO:0000329]; plant-type vacuole [GO:0000325]; proton-transporting V-type ATPase, V1 domain [GO:0033180]	ATP binding [GO:0005524]; ATP hydrolysis activity [GO:0016887]; proton-transporting ATP synthase activity, rotational mechanism [GO:0046933]; proton-transporting ATPase activity, rotational mechanism [GO:0046961]
J9VZT6	WT:uggt	TRUE	1	0.678967	3.68422	3.91928	0.235056	0	1.17695	CNAG_05525		40S ribosomal protein S26	translation [GO:0006412]	cytosolic small ribosomal subunit [GO:0022627]	mRNA binding [GO:0003729]; structural constituent of ribosome [GO:0003735]
J9VPA2	WT:uggt	TRUE	0.1	0.00109775	3.04974	2.59851	-0.451234	0	0.731417	CNAG_00869	AFR2	ABC multidrug transporter AFR2	aggregation involved in sorocarp development [GO:0031152]; sorocarp morphogenesis [GO:0031288]	plasma membrane [GO:0005886]	ABC-type transporter activity [GO:0140359]; ATP binding [GO:0005524]; ATP hydrolysis activity [GO:0016887]
J9VE82	WT:uggt	TRUE	1	0.677313	1.57347	1.53475	-0.038717	0	0.97352	CNAG_07322		RanBD1 domain-containing protein	intracellular transport [GO:0046907]; mRNA transport [GO:0051028]; protein transport [GO:0015031]	nuclear pore [GO:0005643]
J9VV32	WT:uggt	TRUE	0.1	0.000115524	2.746	1.9334	-0.8126	0	0.569355	CNAG_02263		GST N-terminal domain-containing protein
J9VYA4	WT:uggt	TRUE	0.1	0.038293	0.920511	1.61024	0.689727	0	1.61298	CNAG_03485		Polyamine transporter 1		membrane [GO:0016020]	transmembrane transporter activity [GO:0022857]
J9VDK8	WT:uggt	TRUE	0.1	0.0446234	2.36479	1.54633	-0.818462	0	0.567046	CNAG_00233		Mitochondrial import inner membrane translocase subunit TIM14 (Presequence translocated-associated motor subunit PAM18)	protein import into mitochondrial matrix [GO:0030150]	PAM complex, Tim23 associated import motor [GO:0001405]	ATPase activator activity [GO:0001671]
J9VJ24	WT:uggt	TRUE	0.7	0.339888	1.31681	1.05848	-0.258337	0	0.836051	CNAG_04962		M protein repeat protein
J9VL03	WT:uggt	TRUE	0.7	0.34252	2.65098	2.93989	0.28891	0	1.22172	CNAG_00990		F-type H-transporting ATPase subunit H		mitochondrial proton-transporting ATP synthase complex, coupling factor F(o) [GO:0000276]	proton-transporting ATP synthase activity, rotational mechanism [GO:0046933]
J9VWQ8	WT:uggt	TRUE	0.2	0.215286	-0.755398	-0.590551	0.164848	0	1.12105	CNAG_05831		Endoribonuclease		cytosol [GO:0005829]; mitochondrion [GO:0005739]	deaminase activity [GO:0019239]
J9VRA4	WT:uggt	TRUE	0.1	6.07517e-06	0.34168	1.23983	0.898152	0	1.86368	CNAG_04245		Chitinase	chitin catabolic process [GO:0006032]; polysaccharide catabolic process [GO:0000272]	extracellular region [GO:0005576]	chitin binding [GO:0008061]; chitinase activity [GO:0004568]
J9VIJ3	WT:uggt	TRUE	0.1	0.0102058	-2.57611	-3.2702	-0.694089	0	0.6181	CNAG_03730		DNA-directed RNA polymerase II subunit RPB11		RNA polymerase II, core complex [GO:0005665]	protein dimerization activity [GO:0046983]; RNA polymerase II activity [GO:0001055]
J9VH45	WT:uggt	TRUE	0.7	0.554166	2.09865	2.16797	0.0693199	0	1.04922	CNAG_00565		Dynamin GTPase	organelle organization [GO:0006996]	cytoplasm [GO:0005737]; membrane [GO:0016020]; microtubule [GO:0005874]	GTP binding [GO:0005525]; GTPase activity [GO:0003924]; microtubule binding [GO:0008017]
J9VFE2	WT:uggt	TRUE	0.7	0.729122	-0.197741	-0.271249	-0.0735082	0	0.950324	CNAG_00684		Ribulose-phosphate 3-epimerase (EC 5.1.3.1)	carbohydrate metabolic process [GO:0005975]; pentose-phosphate shunt, non-oxidative branch [GO:0009052]	cytosol [GO:0005829]	D-ribulose-phosphate 3-epimerase activity [GO:0004750]; metal ion binding [GO:0046872]
J9VRS2	WT:uggt	TRUE	0.7	0.454895	-0.0275993	-0.280755	-0.253156	0	0.839059	CNAG_05792		Proteasome subunit alpha type	proteasomal protein catabolic process [GO:0010498]; ubiquitin-dependent protein catabolic process [GO:0006511]	cytosol [GO:0005829]; nucleus [GO:0005634]; proteasome core complex, alpha-subunit complex [GO:0019773]
J9VRA3	WT:uggt	TRUE	0.1	0.00213658	2.82823	2.03357	-0.794658	0	0.57648	CNAG_04985		Nascent polypeptide-associated complex subunit alpha (Alpha-NAC)	protein targeting to membrane [GO:0006612]; protein transport [GO:0015031]	nascent polypeptide-associated complex [GO:0005854]; nucleus [GO:0005634]	unfolded protein binding [GO:0051082]
J9VIC0	WT:uggt	TRUE	0.1	0.00419863	1.80142	1.02444	-0.776982	0	0.583587	CNAG_03651		Syntaxin 7	Golgi to vacuole transport [GO:0006896]; intracellular protein transport [GO:0006886]; vesicle docking [GO:0048278]; vesicle fusion [GO:0006906]	endomembrane system [GO:0012505]; SNARE complex [GO:0031201]	SNAP receptor activity [GO:0005484]; SNARE binding [GO:0000149]
T2BNN4	WT:uggt	TRUE	0.1	0.000515695	1.66613	2.49589	0.829762	0	1.77739	CNAG_01278		Phospholipid-transporting ATPase (EC 7.6.2.1)	Golgi organization [GO:0007030]; phospholipid translocation [GO:0045332]	plasma membrane [GO:0005886]; trans-Golgi network [GO:0005802]	ATP binding [GO:0005524]; ATP hydrolysis activity [GO:0016887]; magnesium ion binding [GO:0000287]; phosphatidylethanolamine flippase activity [GO:0090555]
J9VL99	WT:uggt	TRUE	0.4	0.239872	2.01997	1.9237	-0.0962696	0	0.935449	CNAG_01128		hydroxyacylglutathione hydrolase (EC 3.1.2.6) (Glyoxalase II)	methylglyoxal catabolic process to D-lactate via S-lactoyl-glutathione [GO:0019243]		hydroxyacylglutathione hydrolase activity [GO:0004416]; metal ion binding [GO:0046872]
J9VTH4	WT:uggt	TRUE	0.1	0.0724977	-2.30792	-1.17656	1.13137	0	2.19066	CNAG_01552		Blocked early in transport 1	endoplasmic reticulum to Golgi vesicle-mediated transport [GO:0006888]; protein transport [GO:0015031]; vesicle fusion with Golgi apparatus [GO:0048280]	endoplasmic reticulum membrane [GO:0005789]; Golgi apparatus [GO:0005794]; SNARE complex [GO:0031201]	SNAP receptor activity [GO:0005484]
J9W0G9	WT:uggt	TRUE	0.7	0.760875	-1.56106	-1.66418	-0.103119	0	0.931018	CNAG_04678	YPK1	Serine/threonine-protein kinase YPK1 (EC 2.7.11.1)	regulation of sphingolipid biosynthetic process [GO:0090153]	cytoplasm [GO:0005737]; nucleus [GO:0005634]	ATP binding [GO:0005524]; protein serine kinase activity [GO:0106310]; protein serine/threonine kinase activity [GO:0004674]
J9VFN3	WT:uggt	TRUE	0.1	0.0592291	0.677061	0.261532	-0.415529	0	0.749745	CNAG_03667		Uncharacterized protein
J9VF80	WT:uggt	TRUE	0.1	0.0261206	3.31779	3.05137	-0.266423	0	0.831378	CNAG_07373		Carbamoyl-phosphate synthase, large subunit	'de novo' pyrimidine nucleobase biosynthetic process [GO:0006207]; 'de novo' UMP biosynthetic process [GO:0044205]; citrulline biosynthetic process [GO:0019240]; glutamine metabolic process [GO:0006541]; UTP biosynthetic process [GO:0006228]	cytosol [GO:0005829]	amino acid binding [GO:0016597]; aspartate carbamoyltransferase activity [GO:0004070]; ATP binding [GO:0005524]; carbamoyl-phosphate synthase (glutamine-hydrolyzing) activity [GO:0004088]; dihydroorotase activity [GO:0004151]; metal ion binding [GO:0046872]
J9VXA5	WT:uggt	TRUE	0.1	0.00680725	4.42389	5.06536	0.641469	0	1.55992	CNAG_03120	AGS1	alpha-1,3-glucan synthase (EC 2.4.1.183)	fungal-type cell wall (1->3)-alpha-glucan biosynthetic process [GO:0070600]	fungal-type cell wall [GO:0009277]; membrane [GO:0016020]	alpha-1,3-glucan synthase activity [GO:0047657]
J9VQP1	WT:uggt	TRUE	0.1	0.000205642	-0.539272	0.355031	0.894304	0	1.85871	CNAG_02677		Cytoplasmic protein	cytoplasmic translation [GO:0002181]	cytosol [GO:0005829]	metal ion binding [GO:0046872]; mRNA binding [GO:0003729]
J9VJ49	WT:uggt	TRUE	0.7	0.192536	3.29931	2.74677	-0.552535	0	0.681821	CNAG_05197		NADH-ubiquinone oxidoreductase	mitochondrial electron transport, NADH to ubiquinone [GO:0006120]	mitochondrial respiratory chain complex I [GO:0005747]
J9VXU8	WT:uggt	TRUE	0.7	0.249779	-1.15344	-0.509641	0.643799	0	1.56244	CNAG_03309		Pre-mRNA-splicing factor CWC21	mRNA processing [GO:0006397]	nucleus [GO:0005634]
J9VRR4	WT:uggt	TRUE	0.1	0.0460313	1.14679	0.708278	-0.438508	0	0.737897	CNAG_04196		Actin binding protein	Arp2/3 complex-mediated actin nucleation [GO:0034314]	actin cortical patch [GO:0030479]; Arp2/3 protein complex [GO:0005885]	actin filament binding [GO:0051015]
J9VE80	WT:uggt	TRUE	0.1	0.0397459	1.02898	1.60036	0.57138	0	1.48594	CNAG_00485		Uncharacterized protein		membrane [GO:0016020]
J9VLI0	WT:uggt	TRUE	0.1	0.0628846	-0.869384	-1.43189	-0.562508	0	0.677124	CNAG_03924		Nit protein 1	nucleobase-containing compound metabolic process [GO:0006139]		bis(5'-adenosyl)-triphosphatase activity [GO:0047710]; hydrolase activity, acting on carbon-nitrogen (but not peptide) bonds, in linear amides [GO:0016811]
J9VH03	WT:uggt	TRUE	0.1	0.00654551	5.1383	4.2639	-0.874391	0	0.545484	CNAG_03000		Small subunit ribosomal protein S19e	ribosomal small subunit assembly [GO:0000028]; translation [GO:0006412]	cytosolic small ribosomal subunit [GO:0022627]	RNA binding [GO:0003723]; structural constituent of ribosome [GO:0003735]
J9VD75	WT:uggt	TRUE	0.1	0.000294938	3.83198	3.10538	-0.726602	0	0.604326	CNAG_00100		Stress-induced-phosphoprotein 1		cytoplasm [GO:0005737]	Hsp90 protein binding [GO:0051879]
J9VMA6	WT:uggt	TRUE	0.7	0.805226	1.00375	1.04542	0.0416717	0	1.02931	CNAG_02213		Epsin	actin filament organization [GO:0007015]; endocytosis [GO:0006897]	clathrin vesicle coat [GO:0030125]; endosome [GO:0005768]; plasma membrane [GO:0005886]	clathrin binding [GO:0030276]; phospholipid binding [GO:0005543]
J9VGE0	WT:uggt	TRUE	0.1	0.0227245	-1.58562	-1.27591	0.309708	0	1.23946	CNAG_03942		THO complex subunit 2	mRNA export from nucleus [GO:0006406]; mRNA processing [GO:0006397]	THO complex part of transcription export complex [GO:0000445]	mRNA binding [GO:0003729]
J9VKV8	WT:uggt	TRUE	0.1	0.0634156	4.21974	4.46809	0.248341	0	1.18784	CNAG_03739		Large subunit ribosomal protein L10-like	translation [GO:0006412]	cytosolic large ribosomal subunit [GO:0022625]	structural constituent of ribosome [GO:0003735]
J9VX05	WT:uggt	TRUE	0.1	0.00686392	5.41467	5.99169	0.577018	0	1.49176	CNAG_05555		60S ribosomal protein L8	maturation of LSU-rRNA [GO:0000470]	cytosolic large ribosomal subunit [GO:0022625]	RNA binding [GO:0003723]
J9VIJ6	WT:uggt	TRUE	0.1	0.149948	3.76711	4.04652	0.279409	0	1.2137	CNAG_00256		aspartate-semialdehyde dehydrogenase (EC 1.2.1.11)	lysine biosynthetic process via diaminopimelate [GO:0009089]; methionine biosynthetic process [GO:0009086]; threonine biosynthetic process [GO:0009088]		aspartate-semialdehyde dehydrogenase activity [GO:0004073]; NAD binding [GO:0051287]; NADP binding [GO:0050661]; protein dimerization activity [GO:0046983]
J9VGA6	WT:uggt	TRUE	1	0.897959	-2.95393	-2.87646	0.0774741	0	1.05517	CNAG_03668		Cytoplasmic protein
J9VLC5	WT:uggt	TRUE	0.1	0.111747	1.67672	0.896308	-0.780408	0	0.582202	CNAG_02546		Transferase	GMP salvage [GO:0032263]; hypoxanthine metabolic process [GO:0046100]; IMP salvage [GO:0032264]; XMP salvage [GO:0032265]	cytoplasm [GO:0005737]	hypoxanthine phosphoribosyltransferase activity [GO:0004422]
J9VKQ5	WT:uggt	TRUE	0.2	0.0961242	-2.71699	-3.74577	-1.02878	0	0.490124	CNAG_02686		mevalonate kinase (EC 2.7.1.36)	'de novo' L-methionine biosynthetic process [GO:0071266]; isopentenyl diphosphate biosynthetic process, mevalonate pathway [GO:0019287]; transsulfuration [GO:0019346]	cytoplasm [GO:0005737]	ATP binding [GO:0005524]; carbon-sulfur lyase activity [GO:0016846]; mevalonate kinase activity [GO:0004496]; pyridoxal phosphate binding [GO:0030170]
J9VLT3	WT:uggt	TRUE	0.1	0.0521231	1.25098	0.532735	-0.718245	0	0.607836	CNAG_04054		Translation initiation factor SUI1		eukaryotic 43S preinitiation complex [GO:0016282]	ribosomal small subunit binding [GO:0043024]; RNA binding [GO:0003723]; translation initiation factor activity [GO:0003743]
J9VS37	WT:uggt	TRUE	0.1	0.00177319	0.982985	0.7661	-0.216884	0	0.860422	CNAG_04347		aspartate kinase (EC 2.7.2.4)	homoserine biosynthetic process [GO:0009090]; lysine biosynthetic process via diaminopimelate [GO:0009089]	cytosol [GO:0005829]	aspartate kinase activity [GO:0004072]; ATP binding [GO:0005524]
J9W469	WT:uggt	TRUE	0.1	0.000593036	2.97277	2.40962	-0.563155	0	0.67682	CNAG_05602		Multifunctional fusion protein [Includes: Delta-1-pyrroline-5-carboxylate dehydrogenase (P5C dehydrogenase) (L-glutamate gamma-semialdehyde dehydrogenase); L-glutamate gamma-semialdehyde dehydrogenase (EC 1.2.1.88)]	proline catabolic process to glutamate [GO:0010133]	cytoplasmic side of plasma membrane [GO:0009898]; mitochondrial matrix [GO:0005759]	1-pyrroline-5-carboxylate dehydrogenase activity [GO:0003842]
J9VW24	WT:uggt	TRUE	0.4	0.296916	5.3819	5.24645	-0.135449	0	0.910387	CNAG_06443		Endoplasmic reticulum chaperone BiP (EC 3.6.4.10) (Immunoglobulin heavy chain-binding protein homolog)	endoplasmic reticulum unfolded protein response [GO:0030968]	endoplasmic reticulum chaperone complex [GO:0034663]; endoplasmic reticulum lumen [GO:0005788]; membrane [GO:0016020]; nucleus [GO:0005634]	ATP binding [GO:0005524]; ATP-dependent protein folding chaperone [GO:0140662]
J9VNA2	WT:uggt	TRUE	0.1	0.00171968	3.08034	2.67459	-0.405747	0	0.754845	CNAG_02076		Leukotriene A-4 hydrolase/aminopeptidase	peptide catabolic process [GO:0043171]; proteolysis [GO:0006508]	cytosol [GO:0005829]; nucleus [GO:0005634]	epoxide hydrolase activity [GO:0004301]; leukotriene-A4 hydrolase activity [GO:0004463]; metalloaminopeptidase activity [GO:0070006]; zinc ion binding [GO:0008270]
J9VU36	WT:uggt	TRUE	0.7	0.417033	-0.248432	-0.52738	-0.278948	0	0.824192	CNAG_01578		Zinc knuckle-domain-containing protein			nucleic acid binding [GO:0003676]; zinc ion binding [GO:0008270]
J9VTG0	WT:uggt	TRUE	0.1	0.0349537	1.68593	1.39257	-0.293353	0	0.816003	CNAG_06594		Oxysterol binding protein		cytosol [GO:0005829]; intracellular membrane-bounded organelle [GO:0043231]; membrane [GO:0016020]	oxysterol binding [GO:0008142]
J9VLD5	WT:uggt	TRUE	1	0.873248	1.80892	1.79796	-0.0109575	0	0.992434	CNAG_01083		26S proteasome regulatory subunit N5		cytoplasm [GO:0005737]; proteasome regulatory particle, lid subcomplex [GO:0008541]
T2BPG1	WT:uggt	TRUE	0.1	0.0477992	0.957392	1.78108	0.823685	0	1.76992	CNAG_04380		Peptidase, variant	proteolysis involved in protein catabolic process [GO:0051603]	fungal-type vacuole [GO:0000324]	aspartic-type endopeptidase activity [GO:0004190]
J9VQZ9	WT:uggt	TRUE	0.2	0.233883	3.61462	3.71438	0.0997643	0	1.0716	CNAG_01117		Elongation factor 3		cytoplasm [GO:0005737]	ATP binding [GO:0005524]; ATP hydrolysis activity [GO:0016887]; RNA binding [GO:0003723]; translation elongation factor activity [GO:0003746]
J9VWY4	WT:uggt	TRUE	0.1	0.0244072	0.0850975	0.678799	0.593702	0	1.50911	CNAG_01682		Mitochondrial outer membrane 72K protein	protein import into mitochondrial matrix [GO:0030150]; protein insertion into mitochondrial inner membrane [GO:0045039]	mitochondrial outer membrane [GO:0005741]	mitochondrion targeting sequence binding [GO:0030943]; protein transmembrane transporter activity [GO:0008320]
J9VND3	WT:uggt	TRUE	0.7	0.320867	-1.63294	-1.15273	0.480208	0	1.39495	CNAG_07665		Uncharacterized protein
J9VP42	WT:uggt	TRUE	0.1	0.00128501	0.680797	-0.0718238	-0.752621	0	0.593524	CNAG_05933		SLY1 protein	endoplasmic reticulum to Golgi vesicle-mediated transport [GO:0006888]; intracellular protein transport [GO:0006886]	cytosol [GO:0005829]; Golgi membrane [GO:0000139]	syntaxin binding [GO:0019905]
J9VU44	WT:uggt	TRUE	0.1	0.0181161	-2.25349	-3.1123	-0.858802	0	0.55141	CNAG_04175		Uncharacterized protein
J9VQ91	WT:uggt	TRUE	0.1	0.0428976	2.03573	1.73316	-0.302569	0	0.810807	CNAG_02237		Cytoskeleton assembly control protein	actin filament organization [GO:0007015]; clathrin coat assembly [GO:0048268]; endocytosis [GO:0006897]	actin cortical patch [GO:0030479]; clathrin-coated vesicle [GO:0030136]	actin filament binding [GO:0051015]; clathrin adaptor activity [GO:0035615]; clathrin light chain binding [GO:0032051]; phosphatidylinositol-3,4-bisphosphate binding [GO:0043325]; phosphatidylinositol-3,5-bisphosphate binding [GO:0080025]
J9VPP8	WT:uggt	TRUE	0.1	0.0708668	6.05265	5.10551	-0.947144	0	0.518658	CNAG_03007		CipC protein
J9VMZ2	WT:uggt	TRUE	0.1	0.000639118	4.65451	3.68603	-0.968482	0	0.511044	CNAG_02748	UGP1	UTP--glucose-1-phosphate uridylyltransferase (EC 2.7.7.9)	glycogen metabolic process [GO:0005977]; UDP-glucose metabolic process [GO:0006011]	cytoplasm [GO:0005737]	UTP:glucose-1-phosphate uridylyltransferase activity [GO:0003983]
J9VXW1	WT:uggt	TRUE	1	0.711939	-4.48337	-4.26608	0.217283	0	1.16254	CNAG_06016	CAP6	Alpha-1,3-mannosyltransferase
J9VLP5	WT:uggt	TRUE	0.1	0.0615227	4.63922	5.00001	0.360796	0	1.28413	CNAG_04004	RPS1	Small ribosomal subunit protein eS1	translation [GO:0006412]	cytosolic small ribosomal subunit [GO:0022627]	structural constituent of ribosome [GO:0003735]
J9VU63	WT:uggt	TRUE	0.1	0.0292485	0.985904	0.771136	-0.214768	0	0.861685	CNAG_04194	SEC13	Protein transporter SEC13	COPII-coated vesicle budding [GO:0090114]; mRNA transport [GO:0051028]; positive regulation of TOR signaling [GO:0032008]; protein exit from endoplasmic reticulum [GO:0032527]; protein import into nucleus [GO:0006606]	COPII vesicle coat [GO:0030127]; nuclear pore outer ring [GO:0031080]	structural molecule activity [GO:0005198]
J9VZQ5	WT:uggt	TRUE	0.1	0.0437457	-2.38951	-3.02665	-0.63714	0	0.642986	CNAG_01970		C3H1-type domain-containing protein	negative regulation of DNA-templated transcription [GO:0045892]	nucleus [GO:0005634]	metal ion binding [GO:0046872]; RNA binding [GO:0003723]
J9VKY5	WT:uggt	TRUE	0.1	0.00010434	5.88923	5.27805	-0.611184	0	0.654659	CNAG_01005		Glutaredoxin	cellular response to oxidative stress [GO:0034599]	cytoplasm [GO:0005737]; nucleus [GO:0005634]	glutathione disulfide oxidoreductase activity [GO:0015038]
J9W0I6	WT:uggt	TRUE	0.1	0.00548726	5.44864	6.18431	0.735663	0	1.66516	CNAG_06231		Large subunit ribosomal protein L13	negative regulation of translation [GO:0017148]; translation [GO:0006412]	cytosolic large ribosomal subunit [GO:0022625]	mRNA binding [GO:0003729]; structural constituent of ribosome [GO:0003735]
J9VSG5	WT:uggt	TRUE	0.1	0.0400101	1.04977	1.44099	0.391223	0	1.3115	CNAG_07636	CSR2	Chitin synthase regulator 2	fungal-type cell wall chitin biosynthetic process [GO:0034221]	plasma membrane [GO:0005886]	enzyme activator activity [GO:0008047]
J9VN00	WT:uggt	TRUE	0.2	0.125483	1.99072	1.75629	-0.234433	0	0.850019	CNAG_02736		CCT-theta		chaperonin-containing T-complex [GO:0005832]	ATP binding [GO:0005524]; ATP hydrolysis activity [GO:0016887]; ATP-dependent protein folding chaperone [GO:0140662]; unfolded protein binding [GO:0051082]
O94746	WT:uggt	TRUE	0.1	9.57383e-06	4.17115	3.39919	-0.771957	0	0.585622	CNAG_03682	FRR1	FK506-binding protein 1 (FKBP) (EC 5.2.1.8) (Peptidyl-prolyl cis-trans isomerase) (PPIase) (Rapamycin-binding protein)		cytoplasm [GO:0005737]	peptidyl-prolyl cis-trans isomerase activity [GO:0003755]
J9VUB5	WT:uggt	TRUE	0.2	0.235213	0.24761	0.463996	0.216386	0	1.16182	CNAG_05884		Importin beta-4 subunit	protein import into nucleus [GO:0006606]	cytoplasm [GO:0005737]; nucleus [GO:0005634]	nuclear import signal receptor activity [GO:0061608]; nuclear localization sequence binding [GO:0008139]; small GTPase binding [GO:0031267]
J9VX52	WT:uggt	TRUE	0.1	8.81369e-05	2.91784	2.59779	-0.320052	0	0.801041	CNAG_04485		Long-chain acyl-CoA synthetase	long-chain fatty-acyl-CoA metabolic process [GO:0035336]; neuron differentiation [GO:0030182]	endoplasmic reticulum [GO:0005783]; lipid droplet [GO:0005811]; plasma membrane [GO:0005886]	palmitoyl-CoA ligase activity [GO:0090433]
J9W0V8	WT:uggt	TRUE	0.1	0.0125891	0.330217	-0.606628	-0.936845	0	0.522374	CNAG_06361		26S proteasome regulatory subunit N6	ubiquitin-dependent protein catabolic process [GO:0006511]	proteasome regulatory particle, lid subcomplex [GO:0008541]	structural molecule activity [GO:0005198]
J9VV89	WT:uggt	TRUE	0.1	0.0672874	6.87193	6.11899	-0.752945	0	0.593391	CNAG_01984		Transaldolase (EC 2.2.1.2)	carbohydrate metabolic process [GO:0005975]; pentose-phosphate shunt, non-oxidative branch [GO:0009052]	cytosol [GO:0005829]	transaldolase activity [GO:0004801]
J9VUD6	WT:uggt	TRUE	0.1	0.000660823	4.19876	3.67482	-0.523943	0	0.695468	CNAG_05904		Small subunit ribosomal protein S14	ribosomal small subunit assembly [GO:0000028]; translation [GO:0006412]	cytosolic small ribosomal subunit [GO:0022627]	structural constituent of ribosome [GO:0003735]
J9VJE6	WT:uggt	TRUE	0.4	0.208562	-2.979	-2.25638	0.722617	0	1.65017	CNAG_05083		Esterase/lipase			lipase activity [GO:0016298]
J9VQH5	WT:uggt	TRUE	0.1	0.000586613	-1.39207	-2.23371	-0.841639	0	0.558009	CNAG_02149		Succinate dehydrogenase assembly factor 4, mitochondrial	mitochondrial respiratory chain complex II assembly [GO:0034553]	mitochondrion [GO:0005739]
J9VKS6	WT:uggt	TRUE	0.2	0.105704	0.573517	0.784691	0.211174	0	1.15763	CNAG_00148		Protein transport protein sec16	autophagy [GO:0006914]; COPII vesicle coating [GO:0048208]; Golgi organization [GO:0007030]; protein localization to endoplasmic reticulum exit site [GO:0070973]; protein transport [GO:0015031]	endoplasmic reticulum exit site [GO:0070971]; endoplasmic reticulum membrane [GO:0005789]; ER to Golgi transport vesicle membrane [GO:0012507]
J9VV68	WT:uggt	TRUE	0.1	0.000206871	5.3614	4.78855	-0.572854	0	0.672286	CNAG_04904		Clathrin heavy chain	Golgi to endosome transport [GO:0006895]; intracellular protein transport [GO:0006886]; receptor-mediated endocytosis [GO:0006898]	actin cortical patch [GO:0030479]; clathrin coat of coated pit [GO:0030132]; clathrin coat of trans-Golgi network vesicle [GO:0030130]; clathrin complex [GO:0071439]; clathrin-coated endocytic vesicle [GO:0045334]; cytosol [GO:0005829]	clathrin light chain binding [GO:0032051]; structural molecule activity [GO:0005198]
J9VKN9	WT:uggt	TRUE	0.1	0.00389589	6.53222	5.89865	-0.633574	0	0.644577	CNAG_01332		Small subunit ribosomal protein S24e	translation [GO:0006412]	ribonucleoprotein complex [GO:1990904]; ribosome [GO:0005840]	structural constituent of ribosome [GO:0003735]
J9VMB6	WT:uggt	TRUE	0.1	0.000458221	0.137781	-0.760204	-0.897986	0	0.536636	CNAG_02948		Peptide chain release factor 1	cytoplasmic translational termination [GO:0002184]	cytosol [GO:0005829]; translation release factor complex [GO:0018444]	sequence-specific mRNA binding [GO:1990825]; translation release factor activity, codon specific [GO:0016149]
J9VMZ8	WT:uggt	TRUE	0.2	0.162469	1.7757	1.48138	-0.294325	0	0.815454	CNAG_02197		Pinin/SDK/MemA protein domain-containing protein	mRNA processing [GO:0006397]; RNA splicing [GO:0008380]	catalytic step 2 spliceosome [GO:0071013]
J9VLL1	WT:uggt	TRUE	0.1	0.000352388	0.943617	0.0898372	-0.853779	0	0.553333	CNAG_03959		Uncharacterized protein
J9VN41	WT:uggt	TRUE	0.7	0.697471	3.25832	3.2014	-0.0569243	0	0.961311	CNAG_03606		Translation initiation factor aIF-2		mitochondrion [GO:0005739]	GTP binding [GO:0005525]; GTPase activity [GO:0003924]; translation initiation factor activity [GO:0003743]
T2BPZ1	WT:uggt	TRUE	0.1	0.0798278	1.28371	0.957788	-0.325925	0	0.797787	CNAG_08016		Cytochrome b5 heme-binding domain-containing protein		endoplasmic reticulum [GO:0005783]; membrane [GO:0016020]
J9VFR6	WT:uggt	TRUE	1	0.652951	-1.42849	-1.2937	0.134792	0	1.09793	CNAG_00777		CCR4-NOT transcriptional complex subunit CAF120
J9VHP1	WT:uggt	TRUE	0.1	0.000155149	5.00435	4.44424	-0.56011	0	0.67825	CNAG_02974		Voltage-dependent anion channel protein 2		mitochondrial outer membrane [GO:0005741]; pore complex [GO:0046930]	porin activity [GO:0015288]; voltage-gated monoatomic anion channel activity [GO:0008308]
J9VRG4	WT:uggt	TRUE	0.1	0.0626932	-1.62704	-2.32457	-0.697536	0	0.616624	CNAG_04121		EKC/KEOPS complex subunit GON7
J9VK13	WT:uggt	TRUE	0.1	0.0496287	-0.0764172	-0.328156	-0.251739	0	0.839883	CNAG_00788		NADH:ubiquinone reductase (non-electrogenic) (EC 1.6.5.9)	NADH oxidation [GO:0006116]	membrane [GO:0016020]; mitochondrion [GO:0005739]	NADH dehydrogenase activity [GO:0003954]
J9VPZ6	WT:uggt	TRUE	0.4	0.604596	1.0618	0.967317	-0.094478	0	0.936611	CNAG_03109		Ubiquitin carboxyl-terminal hydrolase (EC 3.4.19.12)	proteasome-mediated ubiquitin-dependent protein catabolic process [GO:0043161]; regulation of proteasomal protein catabolic process [GO:0061136]		cysteine-type deubiquitinase activity [GO:0004843]; proteasome binding [GO:0070628]
J9VPY9	WT:uggt	TRUE	0.2	0.177701	1.55868	2.03966	0.480983	0	1.39569	CNAG_03306		Vesicle transport through interaction with t-SNAREs 1	Golgi to vacuole transport [GO:0006896]; intra-Golgi vesicle-mediated transport [GO:0006891]; intracellular protein transport [GO:0006886]; macroautophagy [GO:0016236]; retrograde transport, endosome to Golgi [GO:0042147]; vesicle fusion with Golgi apparatus [GO:0048280]	cytosol [GO:0005829]; endoplasmic reticulum membrane [GO:0005789]; ER to Golgi transport vesicle membrane [GO:0012507]; Golgi apparatus [GO:0005794]; late endosome membrane [GO:0031902]; SNARE complex [GO:0031201]	SNAP receptor activity [GO:0005484]; SNARE binding [GO:0000149]
J9VH48	WT:uggt	TRUE	0.1	0.0648942	4.70868	5.05468	0.345997	0	1.27103	CNAG_03983		Oxidoreductase	small molecule metabolic process [GO:0044281]		oxidoreductase activity [GO:0016491]
J9VVY8	WT:uggt	TRUE	0.4	0.164203	-0.965139	-0.672489	0.29265	0	1.22489	CNAG_06585		Pre-mRNA-splicing helicase BRR2	mRNA processing [GO:0006397]		ATP binding [GO:0005524]; ATP hydrolysis activity [GO:0016887]; helicase activity [GO:0004386]; nucleic acid binding [GO:0003676]
J9VNM6	WT:uggt	TRUE	0.2	0.11173	-0.536823	-0.123508	0.413315	0	1.33174	CNAG_01125		Uncharacterized protein
J9VIV5	WT:uggt	TRUE	1	0.791451	-1.04249	-1.08715	-0.0446607	0	0.969518	CNAG_00374		Senescence domain-containing protein	cell division [GO:0051301]; negative regulation of BMP signaling pathway [GO:0030514]	plasma membrane [GO:0005886]
J9VGW3	WT:uggt	TRUE	0.4	0.268507	5.03848	4.91344	-0.125041	0	0.916978	CNAG_03053		Large subunit ribosomal protein L23	translation [GO:0006412]	cytosolic large ribosomal subunit [GO:0022625]	rRNA binding [GO:0019843]; structural constituent of ribosome [GO:0003735]
O93927	WT:uggt	TRUE	0.1	0.108553	4.61836	4.4565	-0.161862	0	0.893871	CNAG_06508	FKS1	1,3-beta-glucan synthase component FKS1 (EC 2.4.1.34)	(1->3)-beta-D-glucan biosynthetic process [GO:0006075]; cell wall biogenesis [GO:0042546]; cell wall organization [GO:0071555]; fungal-type cell wall polysaccharide biosynthetic process [GO:0051278]	1,3-beta-D-glucan synthase complex [GO:0000148]; perinuclear endoplasmic reticulum [GO:0097038]; plasma membrane [GO:0005886]	1,3-beta-D-glucan synthase activity [GO:0003843]; alpha-1,3-glucan synthase activity [GO:0047657]
J9VJW0	WT:uggt	TRUE	0.1	1.29614e-05	5.12849	4.14588	-0.982615	0	0.506062	CNAG_05256	CAT2	Catalase	hydrogen peroxide catabolic process [GO:0042744]; response to hydrogen peroxide [GO:0042542]	mitochondrion [GO:0005739]; peroxisome [GO:0005777]	catalase activity [GO:0004096]; heme binding [GO:0020037]; metal ion binding [GO:0046872]
J9VSJ2	WT:uggt	TRUE	0.1	0.0659789	6.16916	6.52321	0.354049	0	1.27814	CNAG_02234		60S ribosomal protein L6	cytoplasmic translation [GO:0002181]	cytosolic large ribosomal subunit [GO:0022625]	RNA binding [GO:0003723]; structural constituent of ribosome [GO:0003735]
J9VES3	WT:uggt	TRUE	0.7	0.740517	-0.563931	-0.618679	-0.0547478	0	0.962763	CNAG_00717		CUE domain-containing protein	ubiquitin-dependent protein catabolic process [GO:0006511]	cytoplasm [GO:0005737]	ubiquitin binding [GO:0043130]; ubiquitin conjugating enzyme binding [GO:0031624]
J9VTP7	WT:uggt	TRUE	0.1	0.0722459	-0.623455	-1.25448	-0.631023	0	0.645718	CNAG_06679		anthranilate synthase (EC 4.1.3.27)	tryptophan biosynthetic process [GO:0000162]		anthranilate synthase activity [GO:0004049]
J9VIB2	WT:uggt	TRUE	0.1	0.00108796	1.56279	2.16873	0.605941	0	1.52197	CNAG_03641		Eukaryotic translation initiation factor 3 subunit D (eIF3d)	cap-dependent translational initiation [GO:0002191]; formation of cytoplasmic translation initiation complex [GO:0001732]	eukaryotic 43S preinitiation complex [GO:0016282]; eukaryotic 48S preinitiation complex [GO:0033290]; eukaryotic translation initiation factor 3 complex [GO:0005852]	mRNA cap binding [GO:0098808]; translation initiation factor activity [GO:0003743]
J9VXT3	WT:uggt	TRUE	0.1	0.00839904	-1.06288	-1.41712	-0.354243	0	0.78228	CNAG_05993		Transmembrane transporter Liz1p		membrane [GO:0016020]	transmembrane transporter activity [GO:0022857]
J9VHW8	WT:uggt	TRUE	1	0.61256	-1.72034	-1.80042	-0.0800726	0	0.94601	CNAG_00845		Establishment of cell polarity protein	ribosomal large subunit biogenesis [GO:0042273]; ribosomal small subunit biogenesis [GO:0042274]	nucleolus [GO:0005730]	DNA binding [GO:0003677]; RNA binding [GO:0003723]
J9VZ45	WT:uggt	TRUE	0.4	0.164363	2.66375	2.83517	0.171422	0	1.12617	CNAG_06501	GAS1	1,3-beta-glucanosyltransferase (EC 2.4.1.-)	fungal-type cell wall (1->3)-beta-D-glucan biosynthetic process [GO:0071970]; fungal-type cell wall organization [GO:0031505]	plasma membrane [GO:0005886]; side of membrane [GO:0098552]	1,3-beta-glucanosyltransferase activity [GO:0042124]
J9VYI2	WT:uggt	TRUE	0.1	0.0524429	-0.266817	-0.504652	-0.237836	0	0.848017	CNAG_06248	CLU1 TIF31	Clustered mitochondria protein homolog (Protein TIF31 homolog)	intracellular distribution of mitochondria [GO:0048312]	cytoplasm [GO:0005737]	mRNA binding [GO:0003729]
J9VK75	WT:uggt	TRUE	0.4	0.51854	-3.67074	-4.04284	-0.372107	0	0.772653	CNAG_02851		Threonine aldolase	glycine biosynthetic process [GO:0006545]; threonine catabolic process [GO:0006567]	cytosol [GO:0005829]	L-allo-threonine aldolase activity [GO:0008732]
J9VKM5	WT:uggt	TRUE	0.7	0.17138	0.0739115	0.827656	0.753745	0	1.68616	CNAG_01347	DNJ1	Tetratricopeptide repeat and J domain-containing co-chaperone DNJ1	protein folding in endoplasmic reticulum [GO:0034975]	endoplasmic reticulum lumen [GO:0005788]	misfolded protein binding [GO:0051787]; protein-folding chaperone binding [GO:0051087]
J9VP88	WT:uggt	TRUE	0.7	0.938724	4.79513	4.78304	-0.0120878	0	0.991656	CNAG_05750		ATP synthase subunit alpha		mitochondrial proton-transporting ATP synthase, catalytic core [GO:0005754]	ADP binding [GO:0043531]; ATP binding [GO:0005524]; proton-transporting ATP synthase activity, rotational mechanism [GO:0046933]
J9VJT2	WT:uggt	TRUE	1	0.373813	-0.13687	0.366	0.502869	0	1.41703	CNAG_01420		Amidohydrolase-related domain-containing protein
J9VGY9	WT:uggt	TRUE	0.1	0.000141085	8.26094	7.27648	-0.984453	0	0.505417	CNAG_03015		Ribosomal protein L37	translation [GO:0006412]	cytosolic large ribosomal subunit [GO:0022625]	metal ion binding [GO:0046872]; rRNA binding [GO:0019843]; structural constituent of ribosome [GO:0003735]
J9VJ71	WT:uggt	TRUE	0.7	0.647289	6.3418	6.28459	-0.057214	0	0.961118	CNAG_05232		Large subunit ribosomal protein L8	cytoplasmic translation [GO:0002181]	cytosolic large ribosomal subunit [GO:0022625]	RNA binding [GO:0003723]; structural constituent of ribosome [GO:0003735]
J9VTA4	WT:uggt	TRUE	0.1	0.0661887	3.49207	2.99322	-0.498851	0	0.70767	CNAG_01480		Large subunit ribosomal protein L12	translation [GO:0006412]	cytosolic large ribosomal subunit [GO:0022625]	large ribosomal subunit rRNA binding [GO:0070180]; structural constituent of ribosome [GO:0003735]
J9W2G5	WT:uggt	TRUE	0.1	0.000575071	7.27017	6.336	-0.934169	0	0.523344	CNAG_06095		Large subunit ribosomal protein L13e	translation [GO:0006412]	cytosolic large ribosomal subunit [GO:0022625]	RNA binding [GO:0003723]; structural constituent of ribosome [GO:0003735]
J9VVH4	WT:uggt	TRUE	0.1	0.00155353	4.69466	5.01973	0.325067	0	1.25272	CNAG_02099		Fatty acid synthase subunit beta, fungi type	long-chain fatty acid biosynthetic process [GO:0042759]	fatty acid synthase complex [GO:0005835]	(3R)-3-hydroxypalmitoyl-[acyl-carrier-protein] dehydratase activity [GO:0004317]; [acyl-carrier-protein] S-acetyltransferase activity [GO:0004313]; [acyl-carrier-protein] S-malonyltransferase activity [GO:0004314]; enoyl-[acyl-carrier-protein] reductase (NADH) activity [GO:0004318]; fatty acid synthase activity [GO:0004312]; fatty acyl-[ACP] hydrolase activity [GO:0016297]; holo-[acyl-carrier-pro…
J9VZ46	WT:uggt	TRUE	1	0.945346	-0.697425	-0.682178	0.0152462	0	1.01062	CNAG_07598		Importin-alpha export receptor	protein export from nucleus [GO:0006611]; protein import into nucleus [GO:0006606]	cytosol [GO:0005829]; nuclear envelope [GO:0005635]	nuclear export signal receptor activity [GO:0005049]; small GTPase binding [GO:0031267]
J9VN86	WT:uggt	TRUE	0.7	0.182874	1.56656	1.14058	-0.425974	0	0.744336	CNAG_07558		CS domain-containing protein	chaperone-mediated protein complex assembly [GO:0051131]; protein folding [GO:0006457]	cytosol [GO:0005829]; nucleus [GO:0005634]	Hsp90 protein binding [GO:0051879]; protein-folding chaperone binding [GO:0051087]
J9VHQ4	WT:uggt	TRUE	0.7	0.849205	0.941559	0.980871	0.0393113	0	1.02762	CNAG_02959		High-affinity iron transporter		high-affinity iron permease complex [GO:0033573]	ferrous iron transmembrane transporter activity [GO:0015093]
J9VSA2	WT:uggt	TRUE	0.1	0.000466177	-0.798819	0.0519758	0.850795	0	1.80349	CNAG_05970		non-specific serine/threonine protein kinase (EC 2.7.11.1)	intracellular signal transduction [GO:0035556]; regulation of axonogenesis [GO:0050770]; regulation of MAPK cascade [GO:0043408]	cytoplasm [GO:0005737]	ATP binding [GO:0005524]; protein serine kinase activity [GO:0106310]; protein serine/threonine kinase activity [GO:0004674]
J9VXL7	WT:uggt	TRUE	0.1	0.0001451	4.22686	5.21234	0.985476	0	1.97997	CNAG_03198		40S ribosomal protein S8	maturation of SSU-rRNA from tricistronic rRNA transcript (SSU-rRNA, 5.8S rRNA, LSU-rRNA) [GO:0000462]; translation [GO:0006412]	cytosolic small ribosomal subunit [GO:0022627]	structural constituent of ribosome [GO:0003735]
J9VFU9	WT:uggt	TRUE	0.1	0.0215475	2.91396	2.5761	-0.337866	0	0.791211	CNAG_03742		Staphylococcal nuclease domain-containing protein 1	mRNA catabolic process [GO:0006402]; regulatory ncRNA-mediated gene silencing [GO:0031047]	cytosol [GO:0005829]; nucleus [GO:0005634]; RISC complex [GO:0016442]	nuclease activity [GO:0004518]; RNA binding [GO:0003723]
J9VJU4	WT:uggt	TRUE	0.1	0.00325703	3.69279	2.70718	-0.985601	0	0.505015	CNAG_02991		Cofilin (Actin-depolymerizing factor 1)	actin filament fragmentation [GO:0030043]; actin filament severing [GO:0051014]	actin cortical patch [GO:0030479]; nuclear matrix [GO:0016363]	actin filament binding [GO:0051015]
J9VR22	WT:uggt	TRUE	0.7	0.3886	-0.948345	-1.03254	-0.0842002	0	0.943307	CNAG_01087		RING-type E3 ubiquitin transferase (EC 2.3.2.27)	protein ubiquitination [GO:0016567]	cytoplasm [GO:0005737]	ubiquitin protein ligase activity [GO:0061630]
J9VU31	WT:uggt	TRUE	0.1	0.0605074	0.335571	1.60774	1.27217	0	2.41524	CNAG_01735		Uncharacterized protein
J9VL07	WT:uggt	TRUE	0.1	0.0516811	-0.262256	-0.789946	-0.52769	0	0.693664	CNAG_01238		Arginine biosynthesis bifunctional protein ArgJ, mitochondrial [Cleaved into: Arginine biosynthesis bifunctional protein ArgJ alpha chain; Arginine biosynthesis bifunctional protein ArgJ beta chain] [Includes: Glutamate N-acetyltransferase (GAT) (EC 2.3.1.35) (Ornithine acetyltransferase) (OATase) (Ornithine transacetylase); Amino-acid acetyltransferase (EC 2.3.1.1) (N-acetylglutamate synthase) (…	arginine biosynthetic process [GO:0006526]; ornithine biosynthetic process [GO:0006592]	mitochondrial matrix [GO:0005759]	acetyl-CoA:L-glutamate N-acetyltransferase activity [GO:0004042]; glutamate N-acetyltransferase activity [GO:0004358]; methione N-acyltransferase activity [GO:0103045]
J9VVQ4	WT:uggt	TRUE	0.1	0.123207	7.00911	7.66165	0.65254	0	1.57193	CNAG_02030	GOX2	Glyoxal oxidase		membrane [GO:0016020]
J9VFG4	WT:uggt	TRUE	0.7	0.589341	2.66997	2.6295	-0.0404669	0	0.97234	CNAG_00703		Large subunit ribosomal protein L31e	cytoplasmic translation [GO:0002181]	cytosolic large ribosomal subunit [GO:0022625]	structural constituent of ribosome [GO:0003735]
J9VRP4	WT:uggt	TRUE	0.1	0.0110751	-3.5411	-2.73321	0.807888	0	1.75065	CNAG_02539		AAT family amino acid transporter		membrane [GO:0016020]	amino acid transmembrane transporter activity [GO:0015171]
T2BQ21	WT:uggt	TRUE	0.1	0.00566894	0.611038	-0.367408	-0.978446	0	0.507526	CNAG_08022		CMGC/CDK/CDK5 protein kinase	axonogenesis [GO:0007409]; neuron apoptotic process [GO:0051402]; synaptic vesicle transport [GO:0048489]; vesicle-mediated transport [GO:0016192]	cytoplasm [GO:0005737]; nucleus [GO:0005634]	ATP binding [GO:0005524]; cyclin-dependent protein serine/threonine kinase activity [GO:0004693]
J9VZX1	WT:uggt	TRUE	0.2	0.121556	-2.34888	-1.18013	1.16875	0	2.24817	CNAG_06001		Phosphomevalonate kinase (EC 2.7.4.2)	ergosterol biosynthetic process [GO:0006696]; farnesyl diphosphate biosynthetic process, mevalonate pathway [GO:0010142]; isopentenyl diphosphate biosynthetic process, mevalonate pathway [GO:0019287]	peroxisome [GO:0005777]	ATP binding [GO:0005524]; phosphomevalonate kinase activity [GO:0004631]
J9VL49	WT:uggt	TRUE	0.7	0.763064	4.74007	4.46543	-0.27464	0	0.826656	CNAG_01181		Small subunit ribosomal protein S27Ae	modification-dependent protein catabolic process [GO:0019941]; protein ubiquitination [GO:0016567]; translation [GO:0006412]	cytoplasm [GO:0005737]; nucleus [GO:0005634]; ribonucleoprotein complex [GO:1990904]; ribosome [GO:0005840]	protein tag activity [GO:0031386]; structural constituent of ribosome [GO:0003735]; ubiquitin protein ligase binding [GO:0031625]
J9VLH6	WT:uggt	TRUE	0.7	0.377205	-0.415095	-0.611814	-0.196719	0	0.872533	CNAG_02496		DSBA-like thioredoxin domain-containing protein			oxidoreductase activity [GO:0016491]
J9VPW9	WT:uggt	TRUE	0.1	0.00422204	1.96125	2.3742	0.412952	0	1.33141	CNAG_03287		Golgi SNAP receptor complex member 1	endoplasmic reticulum to Golgi vesicle-mediated transport [GO:0006888]; protein transport [GO:0015031]; vesicle fusion [GO:0006906]	cis-Golgi network [GO:0005801]; Golgi medial cisterna [GO:0005797]; Golgi membrane [GO:0000139]; SNARE complex [GO:0031201]	SNAP receptor activity [GO:0005484]
J9VJ06	WT:uggt	TRUE	0.1	0.0395814	2.43669	1.94621	-0.490477	0	0.71179	CNAG_00447		CCT-beta		chaperonin-containing T-complex [GO:0005832]	ATP binding [GO:0005524]; ATP hydrolysis activity [GO:0016887]; ATP-dependent protein folding chaperone [GO:0140662]; unfolded protein binding [GO:0051082]
J9VQI1	WT:uggt	TRUE	0.1	0.0265902	3.3169	4.17357	0.85667	0	1.81085	CNAG_02144		Ribosomal protein	maturation of LSU-rRNA [GO:0000470]; translation [GO:0006412]	cytosolic large ribosomal subunit [GO:0022625]	RNA binding [GO:0003723]; structural constituent of ribosome [GO:0003735]
J9VU93	WT:uggt	TRUE	1	0.691487	-0.62568	-0.710585	-0.0849052	0	0.942846	CNAG_05865		Proteasome subunit beta	proteasome-mediated ubiquitin-dependent protein catabolic process [GO:0043161]	cytoplasm [GO:0005737]; nucleus [GO:0005634]; proteasome core complex [GO:0005839]
J9VSI8	WT:uggt	TRUE	0.1	0.0181107	1.0544	0.64778	-0.406615	0	0.754391	CNAG_02239		26S protease regulatory subunit 4	proteasome-mediated ubiquitin-dependent protein catabolic process [GO:0043161]	nucleus [GO:0005634]; proteasome regulatory particle, base subcomplex [GO:0008540]	ATP binding [GO:0005524]; ATP hydrolysis activity [GO:0016887]; peptidase activity [GO:0008233]; proteasome-activating activity [GO:0036402]
J9W0C4	WT:uggt	TRUE	0.4	0.330022	-1.46107	-1.55749	-0.0964186	0	0.935352	CNAG_04739		Cytochrome c oxidase assembly protein COX19	mitochondrial cytochrome c oxidase assembly [GO:0033617]	mitochondrial intermembrane space [GO:0005758]
J9VR81	WT:uggt	TRUE	0.1	0.0436395	0.784766	1.17365	0.388887	0	1.30938	CNAG_01018		Eukaryotic translation initiation factor 2 subunit gamma (eIF2-gamma) (EC 3.6.5.3)	cytoplasmic translational initiation [GO:0002183]; formation of translation preinitiation complex [GO:0001731]; methylation [GO:0032259]; selenocysteine metabolic process [GO:0016259]	cytosol [GO:0005829]; eukaryotic translation initiation factor 2 complex [GO:0005850]	GTP binding [GO:0005525]; GTPase activity [GO:0003924]; methionyl-initiator methionine tRNA binding [GO:1990856]; methyltransferase activity [GO:0008168]; selenocysteine insertion sequence binding [GO:0035368]; translation initiation factor activity [GO:0003743]
J9VQ32	WT:uggt	TRUE	0.1	0.0152041	-0.541114	-1.06103	-0.519915	0	0.697413	CNAG_02881		Cytidine deaminase (EC 3.5.4.5) (Cytidine aminohydrolase)		cytosol [GO:0005829]	cytidine deaminase activity [GO:0004126]; deoxycytidine deaminase activity [GO:0047844]; identical protein binding [GO:0042802]; zinc ion binding [GO:0008270]
J9VTW3	WT:uggt	TRUE	0.1	0.000182026	2.32428	1.82147	-0.502811	0	0.70573	CNAG_00982		RRM domain-containing protein			nucleic acid binding [GO:0003676]
J9VGH0	WT:uggt	TRUE	0.1	0.00684069	0.803636	-0.0097433	-0.81338	0	0.569047	CNAG_07346		T-complex protein 1 subunit eta (TCP-1-eta) (CCT-eta)		chaperonin-containing T-complex [GO:0005832]	ATP binding [GO:0005524]; ATP hydrolysis activity [GO:0016887]; ATP-dependent protein folding chaperone [GO:0140662]; unfolded protein binding [GO:0051082]
J9VRN5	WT:uggt	TRUE	0.1	0.000574721	1.43239	0.44993	-0.982465	0	0.506114	CNAG_04401		Alpha-soluble NSF attachment protein	intracellular protein transport [GO:0006886]; regulation of synaptic vesicle priming [GO:0010807]; SNARE complex disassembly [GO:0035494]	synaptobrevin 2-SNAP-25-syntaxin-1a complex [GO:0070044]; vacuolar membrane [GO:0005774]	soluble NSF attachment protein activity [GO:0005483]; syntaxin binding [GO:0019905]
J9VHL5	WT:uggt	TRUE	0.1	0.0146038	4.52196	5.15417	0.632208	0	1.54994	CNAG_02811		Small subunit ribosomal protein S29	translation [GO:0006412]	cytosolic small ribosomal subunit [GO:0022627]	structural constituent of ribosome [GO:0003735]; zinc ion binding [GO:0008270]
J9VFG8	WT:uggt	TRUE	0.1	0.0178843	-0.52267	0.309347	0.832017	0	1.78017	CNAG_00708		Pre-mRNA-splicing factor SLT11	RNA splicing [GO:0008380]	Prp19 complex [GO:0000974]; U2-type catalytic step 1 spliceosome [GO:0071006]; U2-type catalytic step 2 spliceosome [GO:0071007]	metal ion binding [GO:0046872]; pre-mRNA binding [GO:0036002]; U6 snRNA binding [GO:0017070]
J9VV98	WT:uggt	TRUE	0.7	0.429364	3.44407	3.79901	0.354939	0	1.27893	CNAG_01994		SET domain-containing protein
J9VNW2	WT:uggt	TRUE	0.1	0.000396592	1.85973	0.881758	-0.977971	0	0.507693	CNAG_06628		Aldehyde dehydrogenase (NAD )			phenylacetaldehyde dehydrogenase activity [GO:0008957]
J9VS18	WT:uggt	TRUE	0.1	0.000753859	4.12678	3.89569	-0.231088	0	0.851992	CNAG_04327		K Homology domain-containing protein	nuclear division [GO:0000280]	cytoplasm [GO:0005737]; nucleus [GO:0005634]	mRNA binding [GO:0003729]
J9VUF2	WT:uggt	TRUE	0.7	0.461342	0.984038	1.01265	0.0286123	0	1.02003	CNAG_05925		Septin ring protein	cilium assembly [GO:0060271]; cytoskeleton-dependent cytokinesis [GO:0061640]	cell division site [GO:0032153]; cytosol [GO:0005829]; microtubule cytoskeleton [GO:0015630]; septin complex [GO:0031105]; septin ring [GO:0005940]	GTP binding [GO:0005525]; GTPase activity [GO:0003924]; molecular adaptor activity [GO:0060090]
J9VDX9	WT:uggt	TRUE	0.1	9.4052e-05	1.0245	1.39723	0.372724	0	1.2948	CNAG_00106		Two-component system sensor protein		membrane [GO:0016020]	histidine phosphotransfer kinase activity [GO:0009927]; phosphorelay sensor kinase activity [GO:0000155]
J9VKA9	WT:uggt	TRUE	0.1	0.00434212	1.29319	1.8832	0.590004	0	1.50525	CNAG_07004		Dihydrolipoyl dehydrogenase (EC 1.8.1.4)		mitochondrion [GO:0005739]; oxoglutarate dehydrogenase complex [GO:0045252]	dihydrolipoyl dehydrogenase activity [GO:0004148]; flavin adenine dinucleotide binding [GO:0050660]
J9VWM9	WT:uggt	TRUE	0.7	0.220388	-0.0449585	0.401381	0.446339	0	1.36258	CNAG_05791		Protein Zds1 C-terminal domain-containing protein	establishment of cell polarity [GO:0030010]; positive regulation of G2/M transition of mitotic cell cycle [GO:0010971]	cell septum [GO:0030428]; cytoplasm [GO:0005737]
J9VUW6	WT:uggt	TRUE	0.2	0.11899	-0.929863	-0.671868	0.257994	0	1.19582	CNAG_01853		Splicing factor subunit	mRNA splicing, via spliceosome [GO:0000398]	precatalytic spliceosome [GO:0071011]; U2 snRNP [GO:0005686]
J9VWA1	WT:uggt	TRUE	0.7	0.791207	0.555388	0.409462	-0.145925	0	0.903799	CNAG_06288		RNA binding protein	mRNA splicing, via spliceosome [GO:0000398]	U1 snRNP [GO:0005685]; U2 snRNP [GO:0005686]	U1 snRNA binding [GO:0030619]
J9VXL1	WT:uggt	TRUE	0.1	0.0649718	3.20173	2.61305	-0.588682	0	0.66495	CNAG_04851		Transitional endoplasmic reticulum ATPase	autophagosome maturation [GO:0097352]; mitotic spindle disassembly [GO:0051228]; retrograde protein transport, ER to cytosol [GO:0030970]	cytosol [GO:0005829]; nucleus [GO:0005634]; VCP-NPL4-UFD1 AAA ATPase complex [GO:0034098]	ATP binding [GO:0005524]; ATP hydrolysis activity [GO:0016887]; polyubiquitin modification-dependent protein binding [GO:0031593]
J9VQJ2	WT:uggt	TRUE	0.1	0.0182021	1.1063	0.474337	-0.631962	0	0.645298	CNAG_02133		6-phosphogluconolactonase (6PGL) (EC 3.1.1.31)	carbohydrate metabolic process [GO:0005975]; pentose-phosphate shunt [GO:0006098]		6-phosphogluconolactonase activity [GO:0017057]
J9W0D7	WT:uggt	TRUE	0.7	0.871953	-2.3912	-2.23612	0.155075	0	1.11348	CNAG_06172		transketolase (EC 2.2.1.1)	pentose-phosphate shunt [GO:0006098]	cytosol [GO:0005829]; nucleus [GO:0005634]	metal ion binding [GO:0046872]; transketolase activity [GO:0004802]
J9VRJ5	WT:uggt	TRUE	0.7	0.425599	1.67401	1.7751	0.101091	0	1.07258	CNAG_00891		ATP-binding cassette, subfamily F, member 2			ATP binding [GO:0005524]; ATP hydrolysis activity [GO:0016887]
J9VTV0	WT:uggt	TRUE	0.7	0.200431	-0.409833	-0.774006	-0.364173	0	0.776914	CNAG_00997		Uncharacterized protein		mitochondrial respiratory chain complex I [GO:0005747]
J9VUK0	WT:uggt	TRUE	0.1	0.000417668	3.26872	2.44542	-0.823308	0	0.565144	CNAG_05978		glutamate--tRNA ligase (EC 6.1.1.17) (Glutamyl-tRNA synthetase)	glutamyl-tRNA aminoacylation [GO:0006424]	cytosol [GO:0005829]; methionyl glutamyl tRNA synthetase complex [GO:0017102]	ATP binding [GO:0005524]; glutamate-tRNA ligase activity [GO:0004818]
J9VVK6	WT:uggt	TRUE	0.1	0.00475197	0.692592	0.0500648	-0.642527	0	0.64059	CNAG_04800		phenylalanine--tRNA ligase (EC 6.1.1.20) (Phenylalanyl-tRNA synthetase alpha subunit)	phenylalanyl-tRNA aminoacylation [GO:0006432]	cytosol [GO:0005829]; phenylalanine-tRNA ligase complex [GO:0009328]	ATP binding [GO:0005524]; metal ion binding [GO:0046872]; phenylalanine-tRNA ligase activity [GO:0004826]; tRNA binding [GO:0000049]
J9VTG3	WT:uggt	TRUE	0.1	0.0437283	3.30054	3.80464	0.504097	0	1.41824	CNAG_03486		Peptidyl-prolyl cis-trans isomerase (PPIase) (EC 5.2.1.8)	protein folding [GO:0006457]	cytosol [GO:0005829]; intracellular membrane-bounded organelle [GO:0043231]; plasma membrane [GO:0005886]	peptidyl-prolyl cis-trans isomerase activity [GO:0003755]
J9VVZ9	WT:uggt	TRUE	0.1	0.00758183	2.64996	2.00394	-0.646017	0	0.639042	CNAG_03577		60S acidic ribosomal protein P0	cytoplasmic translation [GO:0002181]; ribosome biogenesis [GO:0042254]	cytosolic large ribosomal subunit [GO:0022625]	large ribosomal subunit rRNA binding [GO:0070180]; structural constituent of ribosome [GO:0003735]
J9VTJ1	WT:uggt	TRUE	0.1	0.0100853	0.0414346	-0.393346	-0.434781	0	0.739806	CNAG_01111		Eukaryotic translation initiation factor 3 subunit K (eIF3k) (eIF-3 p25)	formation of cytoplasmic translation initiation complex [GO:0001732]; regulation of translational initiation [GO:0006446]	eukaryotic 43S preinitiation complex [GO:0016282]; eukaryotic 48S preinitiation complex [GO:0033290]; eukaryotic translation initiation factor 3 complex [GO:0005852]	ribosome binding [GO:0043022]; RNA binding [GO:0003723]; translation initiation factor activity [GO:0003743]
J9VMQ2	WT:uggt	TRUE	0.1	0.0541018	0.2936	0.650902	0.357301	0	1.28103	CNAG_02309		peptidylprolyl isomerase (EC 5.2.1.8)	chaperone-mediated protein folding [GO:0061077]	endoplasmic reticulum [GO:0005783]	peptidyl-prolyl cis-trans isomerase activity [GO:0003755]
J9VM66	WT:uggt	TRUE	0.1	0.00185187	4.14469	4.96534	0.82065	0	1.7662	CNAG_00656		Large subunit ribosomal protein L7e	maturation of LSU-rRNA from tricistronic rRNA transcript (SSU-rRNA, 5.8S rRNA, LSU-rRNA) [GO:0000463]	cytosolic large ribosomal subunit [GO:0022625]	RNA binding [GO:0003723]; structural constituent of ribosome [GO:0003735]
J9VRB2	WT:uggt	TRUE	1	0.715366	-0.893794	-1.03664	-0.142842	0	0.905733	CNAG_04257		Uncharacterized protein	mitochondrial outer membrane translocase complex assembly [GO:0070096]; protein insertion into mitochondrial outer membrane [GO:0045040]	mitochondrial outer membrane [GO:0005741]
J9W1R7	WT:uggt	TRUE	0.1	0.00733483	3.62201	3.24948	-0.372534	0	0.772425	CNAG_01845		protein kinase C (EC 2.7.11.13)	fungal-type cell wall biogenesis [GO:0009272]; positive regulation of melanin biosynthetic process [GO:0048023]; positive regulation of protein kinase C signaling [GO:0090037]; signal transduction [GO:0007165]	cytoplasm [GO:0005737]; nucleus [GO:0005634]	ATP binding [GO:0005524]; calcium,diacylglycerol-dependent serine/threonine kinase activity [GO:0004698]; diacylglycerol binding [GO:0019992]; diacylglycerol-dependent serine/threonine kinase activity [GO:0004697]; metal ion binding [GO:0046872]; protein serine kinase activity [GO:0106310]
J9VXM5	WT:uggt	TRUE	0.2	0.103727	5.30298	4.60402	-0.698963	0	0.616015	CNAG_05581	CHS3	Chitin synthase 3 (EC 2.4.1.16) (Chitin-UDP acetyl-glucosaminyl transferase 3) (Class-IV chitin synthase 3)	cell wall organization [GO:0071555]; fungal-type cell wall chitin biosynthetic process [GO:0034221]; protein localization to bud neck [GO:0097271]	cell septum [GO:0030428]; cellular bud neck [GO:0005935]; chitosome [GO:0045009]; incipient cellular bud site [GO:0000131]; plasma membrane [GO:0005886]	chitin synthase activity [GO:0004100]
J9VHH2	WT:uggt	TRUE	0.1	0.000437935	-0.063907	-0.962981	-0.899074	0	0.536231	CNAG_07502		CTP synthase (EC 6.3.4.2) (UTP--ammonia ligase)	'de novo' CTP biosynthetic process [GO:0044210]; glutamine metabolic process [GO:0006541]; pyrimidine nucleobase biosynthetic process [GO:0019856]	cytoophidium [GO:0097268]; cytosol [GO:0005829]	ATP binding [GO:0005524]; CTP synthase activity [GO:0003883]; identical protein binding [GO:0042802]
J9VL02	WT:uggt	TRUE	0.1	0.0851473	-2.684	-1.92966	0.754343	0	1.68686	CNAG_02576		Autophagy-related protein 16 domain-containing protein
J9VTZ1	WT:uggt	TRUE	1	0.94025	1.31835	1.32563	0.00727749	0	1.00506	CNAG_05759		Acetyl-CoA carboxylase/biotin carboxylase	fatty acid biosynthetic process [GO:0006633]; malonyl-CoA biosynthetic process [GO:2001295]	mitochondrion [GO:0005739]	acetyl-CoA carboxylase activity [GO:0003989]; ATP binding [GO:0005524]; biotin carboxylase activity [GO:0004075]; metal ion binding [GO:0046872]
J9VQU0	WT:uggt	TRUE	0.7	0.901552	1.60654	1.64408	0.0375428	0	1.02636	CNAG_07559		Glucose-6-phosphate 1-epimerase (EC 5.1.3.15)	carbohydrate metabolic process [GO:0005975]	cytoplasm [GO:0005737]	carbohydrate binding [GO:0030246]; glucose-6-phosphate 1-epimerase activity [GO:0047938]
J9VE48	WT:uggt	TRUE	0.1	0.047829	2.18509	1.69941	-0.485678	0	0.714161	CNAG_00450		3-isopropylmalate dehydrogenase (EC 1.1.1.85)	L-leucine biosynthetic process [GO:0009098]	cytosol [GO:0005829]	3-isopropylmalate dehydrogenase activity [GO:0003862]; magnesium ion binding [GO:0000287]; NAD binding [GO:0051287]
J9VL89	WT:uggt	TRUE	0.1	0.00700533	2.38349	2.61164	0.228149	0	1.17133	CNAG_01137		Aconitate hydratase, mitochondrial (Aconitase) (EC 4.2.1.-)	tricarboxylic acid cycle [GO:0006099]	cytosol [GO:0005829]; mitochondrion [GO:0005739]	4 iron, 4 sulfur cluster binding [GO:0051539]; aconitate hydratase activity [GO:0003994]; metal ion binding [GO:0046872]
J9VKI6	WT:uggt	TRUE	0.1	0.0345263	-0.615606	-0.294157	0.321449	0	1.24958	CNAG_00073		Nuclear mRNA splicing protein		protein-containing complex [GO:0032991]	armadillo repeat domain binding [GO:0070016]; calmodulin binding [GO:0005516]; protein phosphatase 2A binding [GO:0051721]; protein-containing complex binding [GO:0044877]
J9VN60	WT:uggt	TRUE	0.1	0.0025008	0.986022	0.717914	-0.268108	0	0.830408	CNAG_02657	TIF35	Eukaryotic translation initiation factor 3 subunit G (eIF3g) (Eukaryotic translation initiation factor 3 RNA-binding subunit) (eIF-3 RNA-binding subunit) (Translation initiation factor eIF3 p33 subunit homolog) (eIF3 p33 homolog)	formation of cytoplasmic translation initiation complex [GO:0001732]	eukaryotic 43S preinitiation complex [GO:0016282]; eukaryotic 48S preinitiation complex [GO:0033290]; eukaryotic translation initiation factor 3 complex [GO:0005852]	RNA binding [GO:0003723]; translation initiation factor activity [GO:0003743]
J9VUI3	WT:uggt	TRUE	0.1	0.000717692	1.46158	0.678799	-0.782776	0	0.581247	CNAG_04340		RRM domain-containing protein			nucleic acid binding [GO:0003676]
J9VMR1	WT:uggt	TRUE	1	0.802563	-0.743263	-0.688232	0.0550308	0	1.03888	CNAG_00829		E3 ubiquitin ligase complex SCF subunit	mitotic cell cycle [GO:0000278]; protein ubiquitination [GO:0016567]; SCF-dependent proteasomal ubiquitin-dependent protein catabolic process [GO:0031146]	cytoplasm [GO:0005737]; nucleus [GO:0005634]	cullin family protein binding [GO:0097602]; ligase activity [GO:0016874]
J9VW44	WT:uggt	TRUE	0.1	0.00714688	2.74658	3.23671	0.490126	0	1.40457	CNAG_06465		Transcription regulator	phospholipid translocation [GO:0045332]	endoplasmic reticulum [GO:0005783]; Golgi apparatus [GO:0005794]; plasma membrane [GO:0005886]
J9VQH8	WT:uggt	TRUE	0.7	0.82984	4.47524	4.45422	-0.0210128	0	0.985541	CNAG_01273		Cellular nucleic acid-binding protein	positive regulation of cytoplasmic translation [GO:2000767]	cytoplasm [GO:0005737]	mRNA binding [GO:0003729]; single-stranded RNA binding [GO:0003727]; translation regulator activity [GO:0045182]; zinc ion binding [GO:0008270]
J9VS68	WT:uggt	TRUE	0.2	0.129904	1.77183	1.48647	-0.28536	0	0.820537	CNAG_02399		Glutathione reductase (EC 1.8.1.7)	cell redox homeostasis [GO:0045454]; cellular response to oxidative stress [GO:0034599]; glutathione metabolic process [GO:0006749]	cytosol [GO:0005829]; mitochondrion [GO:0005739]	flavin adenine dinucleotide binding [GO:0050660]; glutathione-disulfide reductase (NADPH) activity [GO:0004362]; NADP binding [GO:0050661]
J9VL21	WT:uggt	TRUE	0.1	0.00325476	0.00937794	0.67324	0.663862	0	1.58432	CNAG_01215		Cytochrome b mRNA-processing protein 4
J9VWD6	WT:uggt	TRUE	0.1	0.00378308	2.61406	2.09056	-0.523501	0	0.695682	CNAG_05366		Eukaryotic translation initiation factor 2A (eIF-2A)		cytosolic small ribosomal subunit [GO:0022627]	mRNA binding [GO:0003729]; ribosome binding [GO:0043022]; translation initiation factor activity [GO:0003743]; tRNA binding [GO:0000049]
J9W045	WT:uggt	TRUE	0.1	0.0211688	0.201592	0.831916	0.630324	0	1.54791	CNAG_04840		Small nuclear ribonucleoprotein B and B	mRNA splicing, via spliceosome [GO:0000398]	catalytic step 2 spliceosome [GO:0071013]; cytoplasm [GO:0005737]; U1 snRNP [GO:0005685]; U2 snRNP [GO:0005686]; U2-type prespliceosome [GO:0071004]; U4 snRNP [GO:0005687]; U4/U6 x U5 tri-snRNP complex [GO:0046540]; U5 snRNP [GO:0005682]	RNA binding [GO:0003723]
J9VTF2	WT:uggt	TRUE	0.4	0.493636	0.714217	0.806408	0.0921908	0	1.06599	CNAG_07856		Arylsulfotransferase
J9VNS0	WT:uggt	TRUE	0.1	0.00570286	-2.58048	-1.67718	0.903304	0	1.87035	CNAG_03844		Nonselective cation channel protein		membrane [GO:0016020]
J9VZH7	WT:uggt	TRUE	1	0.924383	-1.89787	-1.91092	-0.0130568	0	0.990991	CNAG_07770		ferric-chelate reductase (NADPH) (EC 1.16.1.9)	copper ion import [GO:0015677]; intracellular iron ion homeostasis [GO:0006879]; iron ion transport [GO:0006826]	plasma membrane [GO:0005886]	ferric-chelate reductase activity [GO:0000293]
J9VX38	WT:uggt	TRUE	0.1	0.0292308	1.00835	1.43226	0.423912	0	1.34156	CNAG_01744	HAD1	Probable phosphatase HAD1 (EC 3.1.3.-)			2-deoxyglucose-6-phosphatase activity [GO:0003850]; beta-phosphoglucomutase activity [GO:0008801]; glycerol-3-phosphatase activity [GO:0043136]; metal ion binding [GO:0046872]
J9VYL9	WT:uggt	TRUE	0.1	0.00127465	2.79137	2.35344	-0.437926	0	0.738195	CNAG_01544		histidine--tRNA ligase (EC 6.1.1.21)	histidyl-tRNA aminoacylation [GO:0006427]; mitochondrial translation [GO:0032543]; nematode larval development [GO:0002119]	cytosol [GO:0005829]; mitochondrion [GO:0005739]	histidine-tRNA ligase activity [GO:0004821]; identical protein binding [GO:0042802]; RNA binding [GO:0003723]
J9VX74	WT:uggt	TRUE	1	0.793587	2.73508	2.71037	-0.0247044	0	0.983022	CNAG_04505		Guanine nucleotide-binding protein subunit alpha	adenylate cyclase-activating G protein-coupled receptor signaling pathway [GO:0007189]	heterotrimeric G-protein complex [GO:0005834]	G protein-coupled receptor binding [GO:0001664]; G-protein beta/gamma-subunit complex binding [GO:0031683]; GTP binding [GO:0005525]; GTPase activity [GO:0003924]
J9VYQ9	WT:uggt	TRUE	0.7	0.359105	-2.05946	-1.81603	0.24343	0	1.1838	CNAG_06333		Replication factor C subunit 3/5	DNA clamp unloading [GO:0090618]; DNA repair [GO:0006281]; DNA strand elongation involved in DNA replication [GO:0006271]	Ctf18 RFC-like complex [GO:0031390]; DNA replication factor C complex [GO:0005663]; Elg1 RFC-like complex [GO:0031391]; Rad17 RFC-like complex [GO:0031389]	ATP binding [GO:0005524]; ATP hydrolysis activity [GO:0016887]; DNA binding [GO:0003677]; DNA clamp loader activity [GO:0003689]
J9VLX1	WT:uggt	TRUE	0.1	8.15027e-05	2.54911	3.53135	0.982241	0	1.97553	CNAG_02367		GTP-binding protein ypt3	exocytosis [GO:0006887]	Golgi apparatus [GO:0005794]; recycling endosome [GO:0055037]	GTP binding [GO:0005525]; GTPase activity [GO:0003924]
J9VUR9	WT:uggt	TRUE	0.1	0.0227211	1.55934	2.14499	0.585652	0	1.50072	CNAG_04441		Polyadenylate-binding protein (PABP)		cytosol [GO:0005829]; nucleus [GO:0005634]; ribonucleoprotein complex [GO:1990904]	mRNA 3'-UTR binding [GO:0003730]; poly(A) binding [GO:0008143]; poly(U) RNA binding [GO:0008266]
J9VZB2	WT:uggt	TRUE	0.1	0.0297063	-2.1086	-1.43986	0.668738	0	1.58968	CNAG_04349		Phospholipid/glycerol acyltransferase domain-containing protein	phospholipid biosynthetic process [GO:0008654]	membrane [GO:0016020]	glycerol-3-phosphate O-acyltransferase activity [GO:0004366]; glycerone-phosphate O-acyltransferase activity [GO:0016287]
J9VXA7	WT:uggt	TRUE	0.1	0.0434215	-0.596982	-0.935382	-0.3384	0	0.790918	CNAG_04540		Translocation protein SEC62	post-translational protein targeting to membrane, translocation [GO:0031204]	endoplasmic reticulum membrane [GO:0005789]
J9VP10	WT:uggt	TRUE	0.1	0.000595464	2.58786	2.05458	-0.53328	0	0.690982	CNAG_05084		Phospholipase A-2-activating protein	proteasome-mediated ubiquitin-dependent protein catabolic process [GO:0043161]; ubiquitin recycling [GO:0010992]	cytoplasm [GO:0005737]; nucleus [GO:0005634]	ubiquitin binding [GO:0043130]
J9VGP8	WT:uggt	TRUE	0.2	0.299574	5.08773	4.71535	-0.372382	0	0.772506	CNAG_00383		Phospholipid-transporting ATPase (EC 7.6.2.1)	endocytic recycling [GO:0032456]; phospholipid translocation [GO:0045332]; post-Golgi vesicle-mediated transport [GO:0006892]	plasma membrane [GO:0005886]	ATP binding [GO:0005524]; ATP hydrolysis activity [GO:0016887]; magnesium ion binding [GO:0000287]; phosphatidylethanolamine flippase activity [GO:0090555]
J9W1J6	WT:uggt	TRUE	0.1	0.0759053	-0.116638	0.584342	0.70098	0	1.62561	CNAG_01743		Uncharacterized protein
J9VWT4	WT:uggt	TRUE	0.2	0.129265	1.9235	1.41871	-0.504784	0	0.704766	CNAG_05462		cytochrome-b5 reductase (EC 1.6.2.2)	ergosterol biosynthetic process [GO:0006696]	mitochondrial outer membrane [GO:0005741]	cytochrome-b5 reductase activity, acting on NAD(P)H [GO:0004128]
J9VTQ9	WT:uggt	TRUE	0.1	0.0103739	2.7084	2.1126	-0.5958	0	0.661677	CNAG_01627		Amino oxidase	negative regulation of transcription by RNA polymerase II [GO:0000122]; positive regulation of transcription by RNA polymerase II [GO:0045944]		chromatin binding [GO:0003682]; flavin adenine dinucleotide binding [GO:0050660]; oxidoreductase activity [GO:0016491]
J9VKG0	WT:uggt	TRUE	0.1	0.000150559	1.5739	0.613422	-0.960481	0	0.513886	CNAG_01404		Hsp71-like protein		cytosol [GO:0005829]; nucleus [GO:0005634]	ATP binding [GO:0005524]; ATP-dependent protein folding chaperone [GO:0140662]
J9W3Z3	WT:uggt	TRUE	0.1	0.0154363	-0.476482	-1.20759	-0.731105	0	0.602443	CNAG_05483		Prefoldin beta subunit	chaperone-mediated protein complex assembly [GO:0051131]; protein folding [GO:0006457]	cytoplasm [GO:0005737]; prefoldin complex [GO:0016272]	protein-folding chaperone binding [GO:0051087]; unfolded protein binding [GO:0051082]
J9VSC3	WT:uggt	TRUE	0.1	0.0410716	3.35366	2.4415	-0.912166	0	0.531387	CNAG_04443		Dienelactone hydrolase domain-containing protein			hydrolase activity [GO:0016787]
J9VY34	WT:uggt	TRUE	0.2	0.229086	4.04269	4.16057	0.117883	0	1.08514	CNAG_06101		ADP/ATP translocase (ADP,ATP carrier protein)	mitochondrial ADP transmembrane transport [GO:0140021]; mitochondrial ATP transmembrane transport [GO:1990544]; negative regulation of mitochondrial outer membrane permeabilization involved in apoptotic signaling pathway [GO:1901029]	mitochondrial inner membrane [GO:0005743]	ATP:ADP antiporter activity [GO:0005471]
J9VWK6	WT:uggt	TRUE	0.1	0.0842748	7.57039	8.31722	0.746828	0	1.6781	CNAG_06400	PMA1	Plasma membrane ATPase (EC 7.1.2.1)	proton export across plasma membrane [GO:0120029]; regulation of intracellular pH [GO:0051453]	plasma membrane [GO:0005886]	ATP binding [GO:0005524]; ATP hydrolysis activity [GO:0016887]; P-type proton-exporting transporter activity [GO:0008553]
J9VQ17	WT:uggt	TRUE	0.1	5.68395e-05	6.48573	7.39016	0.904428	0	1.8718	CNAG_02338	GIS2	Cellular nucleic acid-binding protein	positive regulation of cytoplasmic translation [GO:2000767]	cytoplasm [GO:0005737]	mRNA binding [GO:0003729]; single-stranded RNA binding [GO:0003727]; translation regulator activity [GO:0045182]; zinc ion binding [GO:0008270]
J9VM84	WT:uggt	TRUE	0.1	0.0439022	-0.480383	-0.999952	-0.519569	0	0.69758	CNAG_02983		Proteophosphoglycan ppg4
J9VJG7	WT:uggt	TRUE	0.1	0.00813745	3.69523	2.80782	-0.887411	0	0.540583	CNAG_00626		Uncharacterized protein
J9VJC5	WT:uggt	TRUE	0.1	0.0571026	6.40326	7.565	1.16174	0	2.23727	CNAG_04011		Large subunit ribosomal protein L37a	translation [GO:0006412]	ribonucleoprotein complex [GO:1990904]; ribosome [GO:0005840]	structural constituent of ribosome [GO:0003735]
J9VKD8	WT:uggt	TRUE	0.2	0.153915	-1.01075	-0.827175	0.183575	0	1.13569	CNAG_01424		Autophagy-related protein 11	autophagosome assembly [GO:0000045]; glycophagy [GO:0061723]; piecemeal microautophagy of the nucleus [GO:0034727]; positive regulation of autophagy of mitochondrion [GO:1903599]; positive regulation of protein phosphorylation [GO:0001934]; protein transport [GO:0015031]; reticulophagy [GO:0061709]	Atg1/ULK1 kinase complex [GO:1990316]; phagophore assembly site membrane [GO:0034045]; vacuolar membrane [GO:0005774]	molecular adaptor activity [GO:0060090]; protein kinase binding [GO:0019901]
J9VLG8	WT:uggt	TRUE	0.2	0.259252	2.07266	2.61636	0.5437	0	1.45771	CNAG_01049	NOP10	H/ACA ribonucleoprotein complex subunit NOP10 (Nucleolar protein 10) (Nucleolar protein family A member 3) (snoRNP protein NOP10)	positive regulation of telomerase RNA localization to Cajal body [GO:1904874]; rRNA pseudouridine synthesis [GO:0031118]; snRNA pseudouridine synthesis [GO:0031120]	box H/ACA snoRNP complex [GO:0031429]	snoRNA binding [GO:0030515]; telomerase RNA binding [GO:0070034]
J9VHU4	WT:uggt	TRUE	0.2	0.175569	-0.927231	-1.34302	-0.415786	0	0.749611	CNAG_00815		MFS transporter, SIT family, siderophore-iron:H symporter		endosome [GO:0005768]; vacuolar membrane [GO:0005774]	siderophore-iron transmembrane transporter activity [GO:0015343]
J9VZS2	WT:uggt	TRUE	0.1	0.0123212	3.62259	4.06472	0.442137	0	1.35862	CNAG_01990		Small subunit ribosomal protein S5	ribosomal small subunit assembly [GO:0000028]; translation [GO:0006412]	cytosolic small ribosomal subunit [GO:0022627]	mRNA binding [GO:0003729]; rRNA binding [GO:0019843]; structural constituent of ribosome [GO:0003735]
J9VEK8	WT:uggt	TRUE	0.7	0.940778	-1.75858	-1.73802	0.0205643	0	1.01436	CNAG_00318		Actin-related protein 2/3 complex subunit 5	Arp2/3 complex-mediated actin nucleation [GO:0034314]; cell migration [GO:0016477]; methylation [GO:0032259]; regulation of actin filament polymerization [GO:0030833]	Arp2/3 protein complex [GO:0005885]; cytoplasm [GO:0005737]	actin filament binding [GO:0051015]; methyltransferase activity [GO:0008168]; nucleic acid binding [GO:0003676]
J9VKN3	WT:uggt	TRUE	0.7	0.948917	-0.413713	-0.457867	-0.044154	0	0.969858	CNAG_03669		Zn(2)-C6 fungal-type domain-containing protein	DNA-templated transcription [GO:0006351]	nucleus [GO:0005634]	DNA binding [GO:0003677]; DNA-binding transcription factor activity, RNA polymerase II-specific [GO:0000981]; zinc ion binding [GO:0008270]
J9VGD6	WT:uggt	TRUE	0.1	0.0055112	-0.0697242	-0.960932	-0.891208	0	0.539163	CNAG_03937		Uncharacterized protein
J9VPF2	WT:uggt	TRUE	1	0.366507	3.37475	3.53556	0.160809	0	1.11791	CNAG_05814		Small subunit ribosomal protein S10e		cytosolic small ribosomal subunit [GO:0022627]	RNA binding [GO:0003723]; structural constituent of ribosome [GO:0003735]
J9VMB5	WT:uggt	TRUE	0.1	0.00807875	2.86538	2.24625	-0.619125	0	0.651066	CNAG_05314		ADP-ribosylation factor GTPase-activating protein 2/3	COPI coating of Golgi vesicle [GO:0048205]; endoplasmic reticulum organization [GO:0007029]	Golgi membrane [GO:0000139]	GTPase activator activity [GO:0005096]
J9VJ27	WT:uggt	TRUE	0.1	0.00114074	2.22635	2.58668	0.360329	0	1.28372	CNAG_05172		Myosin-1	actin filament organization [GO:0007015]; endocytosis [GO:0006897]; vesicle transport along actin filament [GO:0030050]	actin cortical patch [GO:0030479]; cell tip [GO:0051286]; myosin complex [GO:0016459]; vesicle [GO:0031982]	actin filament binding [GO:0051015]; ATP binding [GO:0005524]; hydrolase activity [GO:0016787]; microfilament motor activity [GO:0000146]
J9VEN6	WT:uggt	TRUE	0.2	0.185611	-0.388309	-0.870868	-0.482559	0	0.715707	CNAG_00678		Urease accessory protein UreG			GTP binding [GO:0005525]; GTPase activity [GO:0003924]; nickel cation binding [GO:0016151]
J9W0B1	WT:uggt	TRUE	0.1	0.0334417	5.85357	6.28842	0.434843	0	1.35176	CNAG_04762		Large subunit ribosomal protein L4e	translation [GO:0006412]	cytosolic large ribosomal subunit [GO:0022625]	RNA binding [GO:0003723]; structural constituent of ribosome [GO:0003735]
J9VDR3	WT:uggt	TRUE	0.7	0.838681	2.80321	2.73228	-0.0709328	0	0.952022	CNAG_00034		Large subunit ribosomal protein L9e	cytoplasmic translation [GO:0002181]	cytosolic large ribosomal subunit [GO:0022625]	rRNA binding [GO:0019843]; structural constituent of ribosome [GO:0003735]
J9VT96	WT:uggt	TRUE	0.1	0.000544498	3.72008	4.37694	0.656866	0	1.57665	CNAG_01224		Large subunit ribosomal protein L18-A	translation [GO:0006412]	cytosolic large ribosomal subunit [GO:0022625]	RNA binding [GO:0003723]; structural constituent of ribosome [GO:0003735]
T2BMT6	WT:uggt	TRUE	0.4	0.303026	-0.0632149	0.238679	0.301894	0	1.23276	CNAG_05734		Actin cytoskeleton-regulatory complex protein SLA1	actin cortical patch assembly [GO:0000147]	actin cortical patch [GO:0030479]; endosome membrane [GO:0010008]; nucleus [GO:0005634]; plasma membrane [GO:0005886]	cytoskeletal protein binding [GO:0008092]; identical protein binding [GO:0042802]; protein-macromolecule adaptor activity [GO:0030674]; ubiquitin binding [GO:0043130]
J9VY44	WT:uggt	TRUE	0.1	0.00847159	1.78688	1.06053	-0.72635	0	0.604431	CNAG_06112		Ammonium-dependent carbamoyl phosphate synthetase (EC 6.3.4.16) (EC 6.3.5.5) (Arginine-specific carbamoyl phosphate synthetase, ammonia chain) (Glutamine-dependent carbamoyl phosphate synthetase)	glutamine metabolic process [GO:0006541]	cytoplasm [GO:0005737]	ATP binding [GO:0005524]; carbamoyl-phosphate synthase (glutamine-hydrolyzing) activity [GO:0004088]; metal ion binding [GO:0046872]
J9VH56	WT:uggt	TRUE	0.1	0.0799265	-1.24039	-2.11289	-0.872508	0	0.546197	CNAG_03993		RP/EB family microtubule-associated protein	cell division [GO:0051301]; protein localization to microtubule [GO:0035372]; regulation of microtubule polymerization or depolymerization [GO:0031110]; spindle assembly [GO:0051225]; thigmotropism [GO:0009652]	cytoplasmic microtubule [GO:0005881]; microtubule organizing center [GO:0005815]; microtubule plus-end [GO:0035371]; spindle midzone [GO:0051233]	microtubule plus-end binding [GO:0051010]
J9VT78	WT:uggt	TRUE	0.1	0.00954122	3.35025	2.63717	-0.713077	0	0.610018	CNAG_06544		Non-histone chromosomal protein 6	regulation of transcription by RNA polymerase II [GO:0006357]	nucleus [GO:0005634]	DNA binding, bending [GO:0008301]
J9VHM4	WT:uggt	TRUE	1	0.685704	0.424081	0.47769	0.0536097	0	1.03786	CNAG_02795		phosphoribosylglycinamide formyltransferase 1 (EC 2.1.2.2) (5'-phosphoribosylglycinamide transformylase) (GAR transformylase)	'de novo' IMP biosynthetic process [GO:0006189]	cytosol [GO:0005829]	phosphoribosylglycinamide formyltransferase activity [GO:0004644]
T2BN71	WT:uggt	TRUE	0.1	0.00622744	3.1181	2.34329	-0.774814	0	0.584464	CNAG_02943		Cytoplasmic protein, variant
J9VZV8	WT:uggt	TRUE	0.1	0.0591328	0.706611	1.04885	0.342235	0	1.26772	CNAG_04913		Syntaxin 5	endoplasmic reticulum to Golgi vesicle-mediated transport [GO:0006888]; intracellular protein transport [GO:0006886]; vesicle docking [GO:0048278]; vesicle fusion [GO:0006906]	Golgi membrane [GO:0000139]; SNARE complex [GO:0031201]	SNAP receptor activity [GO:0005484]; SNARE binding [GO:0000149]
J9VL78	WT:uggt	TRUE	0.1	0.0150402	-1.70873	-0.811964	0.896767	0	1.86189	CNAG_00286		C3H1-type domain-containing protein	regulation of mRNA stability [GO:0043488]	cytoplasm [GO:0005737]; nucleus [GO:0005634]	metal ion binding [GO:0046872]; poly(A) binding [GO:0008143]
J9VMU2	WT:uggt	TRUE	1	0.629015	-1.19981	-1.11992	0.0798922	0	1.05694	CNAG_02260		Protein FAM50	chromatin organization [GO:0006325]	nucleus [GO:0005634]
W6AN84	WT:uggt	TRUE	0.2	0.115324	1.49854	0.496268	-1.00227	0	0.499214	CNAG_07999		IMS import disulfide relay-system CHCH-CHCH-like Cx9C domain-containing protein	mitochondrial respiratory chain complex I assembly [GO:0032981]	mitochondrion [GO:0005739]
J9VV51	WT:uggt	TRUE	0.1	8.23025e-05	-1.40891	-0.728579	0.680331	0	1.60251	CNAG_06127		Ribosome biogenesis protein NSA2 homolog	maturation of 5.8S rRNA [GO:0000460]; maturation of LSU-rRNA [GO:0000470]	nucleolus [GO:0005730]; preribosome, large subunit precursor [GO:0030687]
J9VJU9	WT:uggt	TRUE	0.1	0.00545452	0.134046	-0.700682	-0.834727	0	0.560689	CNAG_01400		Phospho-2-dehydro-3-deoxyheptonate aldolase (EC 2.5.1.54)	amino acid biosynthetic process [GO:0008652]; aromatic amino acid family biosynthetic process [GO:0009073]	cytoplasm [GO:0005737]	3-deoxy-7-phosphoheptulonate synthase activity [GO:0003849]
J9VDD8	WT:uggt	TRUE	0.7	0.357482	0.224964	-0.0310213	-0.255985	0	0.837415	CNAG_00165		S-methyl-5'-thioadenosine phosphorylase (EC 2.4.2.28) (5'-methylthioadenosine phosphorylase) (MTA phosphorylase) (MTAP) (MTAPase)	L-methionine salvage from methylthioadenosine [GO:0019509]; purine ribonucleoside salvage [GO:0006166]	cytosol [GO:0005829]; nucleus [GO:0005634]	S-methyl-5-thioadenosine phosphorylase activity [GO:0017061]
J9VQK7	WT:uggt	TRUE	0.1	0.000107727	1.83349	0.880191	-0.953299	0	0.51645	CNAG_07746		Methylenetetrahydrofolate dehydrogenase (NADP)	tetrahydrofolate interconversion [GO:0035999]	cytosol [GO:0005829]; mitochondrion [GO:0005739]	ATP binding [GO:0005524]; formate-tetrahydrofolate ligase activity [GO:0004329]; methenyltetrahydrofolate cyclohydrolase activity [GO:0004477]; methylenetetrahydrofolate dehydrogenase (NADP+) activity [GO:0004488]
J9VW84	WT:uggt	TRUE	0.1	0.0575559	0.0341884	0.571064	0.536875	0	1.45083	CNAG_07925		Nucleoprotein TPR	mRNA export from nucleus [GO:0006406]; regulation of mitotic spindle assembly [GO:1901673]	nuclear pore [GO:0005643]	structural constituent of nuclear pore [GO:0017056]
J9VLU4	WT:uggt	TRUE	0.7	0.729252	-0.166542	-0.0701188	0.0964231	0	1.06912	CNAG_00538		37S ribosomal protein mrp10, mitochondrial	mitochondrial translation [GO:0032543]	mitochondrial small ribosomal subunit [GO:0005763]	structural constituent of ribosome [GO:0003735]
J9VV46	WT:uggt	TRUE	0.1	0.0401676	1.12639	0.801845	-0.324543	0	0.798551	CNAG_06122		Glycerol-1-phosphatase			2-deoxyglucose-6-phosphatase activity [GO:0003850]; beta-phosphoglucomutase activity [GO:0008801]; glycerol-3-phosphatase activity [GO:0043136]
J9VUT9	WT:uggt	TRUE	0.1	0.00782985	1.39797	0.637521	-0.760451	0	0.590312	CNAG_01817		Signal recognition particle receptor subunit alpha	intracellular protein transport [GO:0006886]; SRP-dependent cotranslational protein targeting to membrane [GO:0006614]	signal recognition particle receptor complex [GO:0005785]	ATP hydrolysis activity [GO:0016887]; GTP binding [GO:0005525]; GTPase activity [GO:0003924]; signal recognition particle binding [GO:0005047]
J9VVE8	WT:uggt	TRUE	0.1	0.000951343	-1.14219	-0.371702	0.770488	0	1.70585	CNAG_06005		U3 small nucleolar RNA-associated protein 4	maturation of SSU-rRNA from tricistronic rRNA transcript (SSU-rRNA, 5.8S rRNA, LSU-rRNA) [GO:0000462]	90S preribosome [GO:0030686]; small-subunit processome [GO:0032040]; t-UTP complex [GO:0034455]	RNA binding [GO:0003723]
J9VSM1	WT:uggt	TRUE	0.1	0.115373	2.40313	1.70933	-0.693799	0	0.618224	CNAG_02201		WH2 domain-containing protein			actin binding [GO:0003779]
J9VMC5	WT:uggt	TRUE	0.1	0.112858	2.59428	2.69879	0.104512	0	1.07513	CNAG_07628	NIP1	Eukaryotic translation initiation factor 3 subunit C (eIF3c) (Eukaryotic translation initiation factor 3 93 kDa subunit homolog) (eIF3 p93) (Translation initiation factor eIF3, p93 subunit homolog)	formation of cytoplasmic translation initiation complex [GO:0001732]	eukaryotic 43S preinitiation complex [GO:0016282]; eukaryotic 48S preinitiation complex [GO:0033290]; eukaryotic translation initiation factor 3 complex [GO:0005852]	RNA binding [GO:0003723]; translation initiation factor activity [GO:0003743]; translation initiation factor binding [GO:0031369]
J9VYP0	WT:uggt	TRUE	0.1	0.0385415	1.91832	2.67943	0.761105	0	1.69479	CNAG_06311		Golgi apparatus membrane protein TVP38 (Golgi apparatus membrane protein tvp38)		membrane [GO:0016020]
J9VI50	WT:uggt	TRUE	0.2	0.153527	1.42573	1.17914	-0.24659	0	0.842886	CNAG_00147		Pre-mRNA-processing-splicing factor 8	spliceosomal tri-snRNP complex assembly [GO:0000244]	catalytic step 2 spliceosome [GO:0071013]; U5 snRNP [GO:0005682]	metallopeptidase activity [GO:0008237]; pre-mRNA intronic binding [GO:0097157]; U1 snRNA binding [GO:0030619]; U2 snRNA binding [GO:0030620]; U5 snRNA binding [GO:0030623]; U6 snRNA binding [GO:0017070]
J9VKR8	WT:uggt	TRUE	0.1	0.0824524	0.608657	1.06901	0.460351	0	1.37588	CNAG_02671		Pre-mRNA-splicing factor CEF1	mRNA splicing, via spliceosome [GO:0000398]	Prp19 complex [GO:0000974]; spliceosomal complex [GO:0005681]	DNA-binding transcription factor activity, RNA polymerase II-specific [GO:0000981]; RNA polymerase II transcription regulatory region sequence-specific DNA binding [GO:0000977]
J9VG56	WT:uggt	TRUE	0.1	0.00859565	-2.30153	-2.78965	-0.488126	0	0.71295	CNAG_03595		DUF221-domain-containing protein		plasma membrane [GO:0005886]	calcium-activated cation channel activity [GO:0005227]
J9W494	WT:uggt	TRUE	0.1	0.107344	-0.704617	-1.29329	-0.588674	0	0.664954	CNAG_05634		Serine/threonine-protein phosphatase 2A 56 kDa regulatory subunit	signal transduction [GO:0007165]	cytosol [GO:0005829]; nucleus [GO:0005634]; protein phosphatase type 2A complex [GO:0000159]	protein phosphatase activator activity [GO:0072542]
J9VRD5	WT:uggt	TRUE	0.1	0.0128685	-0.894299	-0.0553466	0.838953	0	1.78875	CNAG_04281		Uncharacterized protein		membrane [GO:0016020]
J9VF99	WT:uggt	TRUE	0.1	0.00673973	5.15435	5.79953	0.645184	0	1.56394	CNAG_00640		40S ribosomal protein S4	translation [GO:0006412]	cytosolic small ribosomal subunit [GO:0022627]	rRNA binding [GO:0019843]; structural constituent of ribosome [GO:0003735]
J9VL41	WT:uggt	TRUE	0.1	0.0149912	1.14448	2.04683	0.902346	0	1.8691	CNAG_01190		Protein transport protein SEC22	endoplasmic reticulum to Golgi vesicle-mediated transport [GO:0006888]; protein transport [GO:0015031]; retrograde vesicle-mediated transport, Golgi to endoplasmic reticulum [GO:0006890]; vesicle fusion with Golgi apparatus [GO:0048280]	endoplasmic reticulum membrane [GO:0005789]; endoplasmic reticulum-Golgi intermediate compartment [GO:0005793]; ER to Golgi transport vesicle membrane [GO:0012507]; Golgi membrane [GO:0000139]; SNARE complex [GO:0031201]	SNAP receptor activity [GO:0005484]
J9VEV6	WT:uggt	TRUE	0.1	3.03321e-05	2.26691	1.40277	-0.864142	0	0.549373	CNAG_00471		Cytochrome c oxidase assembly factor 3	mitochondrial cytochrome c oxidase assembly [GO:0033617]	mitochondrial inner membrane [GO:0005743]
J9VRT0	WT:uggt	TRUE	0.7	0.245337	-1.31823	-1.04055	0.277685	0	1.21225	CNAG_05120		Nicotinate phosphoribosyltransferase (EC 6.3.4.21)	NAD salvage [GO:0034355]	cytosol [GO:0005829]	glycosyltransferase activity [GO:0016757]; nicotinate phosphoribosyltransferase activity [GO:0004516]
J9VJD5	WT:uggt	TRUE	0.1	0.000410577	-1.38536	-0.576727	0.808635	0	1.75155	CNAG_04022		Translation initiation factor		catalytic step 2 spliceosome [GO:0071013]; nucleolus [GO:0005730]	ATP binding [GO:0005524]; hydrolase activity [GO:0016787]; mRNA binding [GO:0003729]; RNA helicase activity [GO:0003724]; translation initiation factor activity [GO:0003743]
J9VV75	WT:uggt	TRUE	0.2	0.071975	0.384643	0.911811	0.527168	0	1.4411	CNAG_03263		Elongation factor Tu	mitochondrial translational elongation [GO:0070125]	cytosol [GO:0005829]; mitochondrion [GO:0005739]	GTP binding [GO:0005525]; GTPase activity [GO:0003924]; translation elongation factor activity [GO:0003746]
J9W041	WT:uggt	TRUE	0.7	0.448897	0.259279	0.134836	-0.124443	0	0.917358	CNAG_05665		Magnesium transporter		plasma membrane [GO:0005886]	cobalt ion binding [GO:0050897]; cobalt ion transmembrane transporter activity [GO:0015087]; magnesium ion binding [GO:0000287]; magnesium ion transmembrane transporter activity [GO:0015095]
J9VF25	WT:uggt	TRUE	0.4	0.155599	-2.19253	-2.78013	-0.587594	0	0.665452	CNAG_00557	LSM8	U6 snRNA-associated Sm-like protein LSm8	mRNA splicing, via spliceosome [GO:0000398]	precatalytic spliceosome [GO:0071011]; U4/U6 x U5 tri-snRNP complex [GO:0046540]; U6 snRNP [GO:0005688]	RNA binding [GO:0003723]
J9VS08	WT:uggt	TRUE	0.1	8.58419e-06	-0.680173	0.262563	0.942736	0	1.92217	CNAG_02455		Choline transporter		membrane [GO:0016020]	transmembrane transporter activity [GO:0022857]
J9VXV8	WT:uggt	TRUE	0.1	0.00185009	1.38942	0.646479	-0.742939	0	0.597521	CNAG_03319		Phospholipid binding protein
J9VDA1	WT:uggt	TRUE	0.7	0.30612	0.929525	1.1491	0.219571	0	1.16439	CNAG_00130		CAMK/CAMK1/CAMK1-RCK protein kinase	cellular response to oxidative stress [GO:0034599]		ATP binding [GO:0005524]; calmodulin binding [GO:0005516]; calmodulin-dependent protein kinase activity [GO:0004683]
J9VY05	WT:uggt	TRUE	0.1	0.0482053	0.96632	0.29891	-0.66741	0	0.629636	CNAG_03370		Calcium-binding protein NCS-1		cytosol [GO:0005829]; intracellular membrane-bounded organelle [GO:0043231]; membrane [GO:0016020]	calcium ion binding [GO:0005509]; calcium sensitive guanylate cyclase activator activity [GO:0008048]
J9W1G2	WT:uggt	TRUE	0.1	0.0242904	-1.11208	-1.61215	-0.500065	0	0.707075	CNAG_05416		Pre-mRNA-processing protein 45	mRNA splicing, via spliceosome [GO:0000398]	spliceosomal complex [GO:0005681]
J9W2M7	WT:uggt	TRUE	0.1	0.051266	-1.22866	-0.741425	0.487232	0	1.40175	CNAG_06148		ER transporter 6TM N-terminal domain-containing protein		membrane [GO:0016020]
J9VLP9	WT:uggt	TRUE	0.1	0.000375186	3.3036	2.51565	-0.787947	0	0.579168	CNAG_04009		Aminopeptidase 2	peptide catabolic process [GO:0043171]; proteolysis [GO:0006508]	cytoplasm [GO:0005737]	metalloaminopeptidase activity [GO:0070006]; peptide binding [GO:0042277]; zinc ion binding [GO:0008270]
J9VR33	WT:uggt	TRUE	0.1	0.0167021	6.47331	6.85118	0.377869	0	1.29942	CNAG_03510		60S ribosomal protein L36	cytoplasmic translation [GO:0002181]	cytosolic large ribosomal subunit [GO:0022625]	structural constituent of ribosome [GO:0003735]
J9VNK3	WT:uggt	TRUE	0.1	0.00140925	1.27084	0.537155	-0.733683	0	0.601367	CNAG_03769		Phosphotransferase (EC 2.7.1.-)	glucose metabolic process [GO:0006006]; glycolytic process [GO:0006096]; intracellular glucose homeostasis [GO:0001678]	cytosol [GO:0005829]; mitochondrion [GO:0005739]	ATP binding [GO:0005524]; fructokinase activity [GO:0008865]; glucokinase activity [GO:0004340]; glucose binding [GO:0005536]
J9VQ82	WT:uggt	TRUE	0.1	0.0415841	3.26731	2.4364	-0.830907	0	0.562176	CNAG_02257		GTP-binding nuclear protein	protein import into nucleus [GO:0006606]; ribosomal subunit export from nucleus [GO:0000054]	cytoplasm [GO:0005737]; nucleus [GO:0005634]	GTP binding [GO:0005525]; GTPase activity [GO:0003924]
J9VXU7	WT:uggt	TRUE	0.4	0.124159	1.17972	1.00767	-0.172055	0	0.887577	CNAG_04797		Signal recognition particle subunit SRP19	SRP-dependent cotranslational protein targeting to membrane, signal sequence recognition [GO:0006617]	signal recognition particle, endoplasmic reticulum targeting [GO:0005786]	7S RNA binding [GO:0008312]
J9VHV5	WT:uggt	TRUE	0.1	0.00393443	0.814509	1.38959	0.575085	0	1.48977	CNAG_00061		Citrate synthase	carbohydrate metabolic process [GO:0005975]; citrate metabolic process [GO:0006101]; tricarboxylic acid cycle [GO:0006099]	mitochondrial matrix [GO:0005759]	citrate (Si)-synthase activity [GO:0004108]
J9VKW7	WT:uggt	TRUE	0.4	0.113427	3.15575	2.73788	-0.41787	0	0.748529	CNAG_07570		Synaptobrevin homolog YKT6	endoplasmic reticulum to Golgi vesicle-mediated transport [GO:0006888]	Golgi apparatus [GO:0005794]; plasma membrane [GO:0005886]	SNAP receptor activity [GO:0005484]
J9VHE4	WT:uggt	TRUE	0.1	0.000277685	4.4543	3.64385	-0.810449	0	0.570204	CNAG_00672		Small subunit ribosomal protein S11	translation [GO:0006412]	cytosolic small ribosomal subunit [GO:0022627]	structural constituent of ribosome [GO:0003735]
J9VP44	WT:uggt	TRUE	1	0.880937	-1.69354	-1.75866	-0.0651206	0	0.955865	CNAG_05695		glucosamine-phosphate N-acetyltransferase (EC 2.3.1.4)	signal transduction [GO:0007165]; UDP-N-acetylglucosamine biosynthetic process [GO:0006048]	endoplasmic reticulum [GO:0005783]; endoplasmic reticulum-Golgi intermediate compartment [GO:0005793]; Golgi apparatus [GO:0005794]	glucosamine 6-phosphate N-acetyltransferase activity [GO:0004343]; GTPase activator activity [GO:0005096]; monosaccharide binding [GO:0048029]
J9VET5	WT:uggt	TRUE	0.7	0.867316	2.10859	2.07372	-0.0348724	0	0.976118	CNAG_00441		Inosine-5'-monophosphate dehydrogenase (IMP dehydrogenase) (IMPD) (IMPDH) (EC 1.1.1.205)	GMP biosynthetic process [GO:0006177]; GTP biosynthetic process [GO:0006183]	cytoplasm [GO:0005737]	IMP dehydrogenase activity [GO:0003938]; metal ion binding [GO:0046872]; nucleotide binding [GO:0000166]
J9VJE7	WT:uggt	TRUE	0.7	0.200915	-2.07825	-1.10834	0.96991	0	1.95872	CNAG_00599		Anion transporter	monoatomic anion transport [GO:0006820]; monoatomic ion homeostasis [GO:0050801]	fungal-type vacuole [GO:0000324]; plasma membrane [GO:0005886]	borate efflux transmembrane transporter activity [GO:0080139]; solute:inorganic anion antiporter activity [GO:0005452]
J9VTU3	WT:uggt	TRUE	0.1	0.00149444	2.7461	1.82923	-0.916875	0	0.529655	CNAG_01657		fumarate hydratase (EC 4.2.1.2)	fumarate metabolic process [GO:0006106]; malate metabolic process [GO:0006108]; tricarboxylic acid cycle [GO:0006099]	mitochondrion [GO:0005739]	fumarate hydratase activity [GO:0004333]
J9VQC9	WT:uggt	TRUE	1	0.741642	2.41047	2.35195	-0.058522	0	0.960247	CNAG_03463		Eisosome component PIL1-domain-containing protein	eisosome assembly [GO:0070941]; endocytosis [GO:0006897]	eisosome filament [GO:0036286]; plasma membrane [GO:0005886]	lipid binding [GO:0008289]
J9VG91	WT:uggt	TRUE	0.1	0.0149055	7.92601	7.2301	-0.695912	0	0.617319	CNAG_00232		Large subunit ribosomal protein L30e		cytosolic large ribosomal subunit [GO:0022625]	RNA binding [GO:0003723]; structural constituent of ribosome [GO:0003735]
J9VNE4	WT:uggt	TRUE	0.1	0.00171598	-1.14928	-0.443628	0.705651	0	1.63088	CNAG_02036		Sugar phosphate transporter domain-containing protein		endosome [GO:0005768]; membrane [GO:0016020]; trans-Golgi network [GO:0005802]	antiporter activity [GO:0015297]
J9VUH0	WT:uggt	TRUE	0.1	0.00912157	2.52133	3.2175	0.696161	0	1.62019	CNAG_04320		Polysaccharide synthase Cps1p		membrane [GO:0016020]	glycosyltransferase activity [GO:0016757]
J9VF52	WT:uggt	TRUE	1	0.504105	6.90563	7.27548	0.36985	0	1.29222	CNAG_00821		Large ribosomal subunit protein eL34	translation [GO:0006412]	cytosolic large ribosomal subunit [GO:0022625]	structural constituent of ribosome [GO:0003735]
J9VWC2	WT:uggt	TRUE	0.1	0.0192965	1.13614	0.642994	-0.493142	0	0.710476	CNAG_07590		V-type proton ATPase subunit C		vacuolar proton-transporting V-type ATPase, V1 domain [GO:0000221]	proton-transporting ATPase activity, rotational mechanism [GO:0046961]
J9VRG7	WT:uggt	TRUE	0.1	0.0166605	-0.79851	-0.347477	0.451033	0	1.36702	CNAG_06694		5-hydroxyisourate hydrolase (HIU hydrolase) (HIUHase) (EC 3.5.2.17)	purine nucleobase metabolic process [GO:0006144]		hydroxyisourate hydrolase activity [GO:0033971]
J9W1L5	WT:uggt	TRUE	0.1	0.0466745	1.28899	1.02141	-0.267583	0	0.83071	CNAG_01772		Fe2OG dioxygenase domain-containing protein	small molecule biosynthetic process [GO:0044283]		2-oxoglutarate-dependent dioxygenase activity [GO:0016706]; metal ion binding [GO:0046872]
J9W2V6	WT:uggt	TRUE	0.7	0.190954	-2.53877	-1.96015	0.578624	0	1.49342	CNAG_06237		YeeE/YedE family protein		plasma membrane [GO:0005886]
J9VVM5	WT:uggt	TRUE	1	0.448485	1.43383	1.80851	0.374677	0	1.29655	CNAG_06273		Ribosome biogenesis regulatory protein	endonucleolytic cleavage in ITS1 to separate SSU-rRNA from 5.8S rRNA and LSU-rRNA from tricistronic rRNA transcript (SSU-rRNA, 5.8S rRNA, LSU-rRNA) [GO:0000447]; ribosomal large subunit biogenesis [GO:0042273]	nucleolus [GO:0005730]; preribosome, large subunit precursor [GO:0030687]
J9VHV3	WT:uggt	TRUE	0.1	0.0156572	1.09065	0.564194	-0.526453	0	0.694259	CNAG_02685		FAS1 domain-containing protein	cell adhesion [GO:0007155]; extracellular matrix organization [GO:0030198]; macroautophagy [GO:0016236]	extracellular matrix [GO:0031012]; extracellular space [GO:0005615]; fungal-type vacuole membrane [GO:0000329]	cell adhesion molecule binding [GO:0050839]
J9VPA5	WT:uggt	TRUE	0.1	0.0993348	5.19549	5.76367	0.568183	0	1.48266	CNAG_04021		Large subunit ribosomal protein L24	cytoplasmic translation [GO:0002181]; ribosomal large subunit biogenesis [GO:0042273]	cytosolic large ribosomal subunit [GO:0022625]	RNA binding [GO:0003723]; structural constituent of ribosome [GO:0003735]
J9VVH1	WT:uggt	TRUE	0.1	0.0227904	0.393139	-0.236846	-0.629985	0	0.646183	CNAG_06219		NEDD8-activating enzyme E1 regulatory subunit	protein neddylation [GO:0045116]	cytoplasm [GO:0005737]	NEDD8 activating enzyme activity [GO:0019781]
J9VGZ3	WT:uggt	TRUE	0.7	0.675293	0.0819007	-0.0136968	-0.0955975	0	0.935885	CNAG_03913		AN1-type domain-containing protein	stress granule disassembly [GO:0035617]	cytoplasmic stress granule [GO:0010494]	zinc ion binding [GO:0008270]
J9VI93	WT:uggt	TRUE	0.7	0.517125	0.330011	0.500395	0.170383	0	1.12536	CNAG_00193		GATA type zinc finger protein asd-4	negative regulation of transcription by RNA polymerase II [GO:0000122]; positive regulation of transcription by RNA polymerase II [GO:0045944]	nucleus [GO:0005634]	DNA-binding transcription factor activity, RNA polymerase II-specific [GO:0000981]; RNA polymerase II cis-regulatory region sequence-specific DNA binding [GO:0000978]; zinc ion binding [GO:0008270]
J9VH94	WT:uggt	TRUE	0.7	0.573516	-0.0033768	-0.133499	-0.130122	0	0.913754	CNAG_02915	PDK1	Serine/threonine-protein kinase PDK1 (EC 2.7.11.1)	intracellular signal transduction [GO:0035556]; positive regulation of cell wall integrity MAPK cascade [GO:1903139]; regulation of sphingolipid biosynthetic process [GO:0090153]		ATP binding [GO:0005524]; protein serine/threonine kinase activity [GO:0004674]
J9VHA6	WT:uggt	TRUE	0.7	0.36723	1.58885	1.69304	0.104181	0	1.07488	CNAG_04053		rRNA-processing protein FYV7
J9VJW5	WT:uggt	TRUE	0.4	0.713285	2.31128	2.27768	-0.0335922	0	0.976985	CNAG_05260		Glutamate decarboxylase (EC 4.1.1.15)	glutamate catabolic process [GO:0006538]	cytosol [GO:0005829]	glutamate decarboxylase activity [GO:0004351]; pyridoxal phosphate binding [GO:0030170]
J9VZ19	WT:uggt	TRUE	0.1	0.00295427	2.78127	3.5314	0.75013	0	1.68194	CNAG_06469	APT1	Phospholipid-transporting ATPase (EC 7.6.2.1)	phospholipid translocation [GO:0045332]	plasma membrane [GO:0005886]; trans-Golgi network [GO:0005802]	ATP binding [GO:0005524]; ATP hydrolysis activity [GO:0016887]; magnesium ion binding [GO:0000287]; phosphatidylethanolamine flippase activity [GO:0090555]
J9VST7	WT:uggt	TRUE	0.2	0.0849189	-0.369293	0.0533585	0.422651	0	1.34039	CNAG_03226		Succinate dehydrogenase [ubiquinone] iron-sulfur subunit, mitochondrial (EC 1.3.5.1)	respiratory electron transport chain [GO:0022904]; tricarboxylic acid cycle [GO:0006099]	mitochondrial inner membrane [GO:0005743]; plasma membrane [GO:0005886]	2 iron, 2 sulfur cluster binding [GO:0051537]; 3 iron, 4 sulfur cluster binding [GO:0051538]; 4 iron, 4 sulfur cluster binding [GO:0051539]; electron transfer activity [GO:0009055]; metal ion binding [GO:0046872]; succinate dehydrogenase (quinone) activity [GO:0008177]
J9VQE7	WT:uggt	TRUE	0.1	0.000994871	-1.55498	-0.686239	0.868738	0	1.82606	CNAG_01298		Lysophospholipase NTE1 (EC 3.1.1.5) (Intracellular phospholipase B)	lipid catabolic process [GO:0016042]; phosphatidylcholine metabolic process [GO:0046470]	endoplasmic reticulum membrane [GO:0005789]	lysophospholipase activity [GO:0004622]; phosphatidyl phospholipase B activity [GO:0102545]
J9VWM2	WT:uggt	TRUE	0.7	0.419449	0.161595	0.268453	0.106858	0	1.07688	CNAG_01607		Thioredoxin	cell redox homeostasis [GO:0045454]	cytosol [GO:0005829]	protein-disulfide reductase activity [GO:0015035]
J9W225	WT:uggt	TRUE	0.7	0.324091	0.900381	1.11914	0.218762	0	1.16373	CNAG_01976		Large subunit ribosomal protein L23	translation [GO:0006412]	cytosolic large ribosomal subunit [GO:0022625]	large ribosomal subunit rRNA binding [GO:0070180]; structural constituent of ribosome [GO:0003735]
J9VFK3	WT:uggt	TRUE	0.1	0.00201318	0.491834	1.35542	0.863583	0	1.81955	CNAG_03629		NADH dehydrogenase (Quinone), G subunit	ATP synthesis coupled electron transport [GO:0042773]	membrane [GO:0016020]	4 iron, 4 sulfur cluster binding [GO:0051539]; NADH dehydrogenase (ubiquinone) activity [GO:0008137]
J9VIY5	WT:uggt	TRUE	0.1	0.168958	0.28061	0.505777	0.225167	0	1.16891	CNAG_00421		Charged multivesicular body protein 3	endosome transport via multivesicular body sorting pathway [GO:0032509]; late endosome to vacuole transport [GO:0045324]; protein transport [GO:0015031]	ESCRT III complex [GO:0000815]; multivesicular body [GO:0005771]
J9VF51	WT:uggt	TRUE	0.1	0.00192982	-3.28532	-2.34189	0.943429	0	1.92309	CNAG_00583		Uncharacterized protein		membrane [GO:0016020]
J9VW36	WT:uggt	TRUE	0.4	0.553491	-0.87693	-0.69367	0.183261	0	1.13545	CNAG_04584		Poly(RC)-binding protein 2/3/4			RNA binding [GO:0003723]
J9VN07	WT:uggt	TRUE	0.1	0.00065312	0.506548	0.973483	0.466935	0	1.38217	CNAG_07659		SH3 domain-containing protein		membrane [GO:0016020]
J9VKU6	WT:uggt	TRUE	0.4	0.453807	1.22909	1.10651	-0.122582	0	0.918542	CNAG_01274		Coatomer subunit gamma	endoplasmic reticulum to Golgi vesicle-mediated transport [GO:0006888]; intra-Golgi vesicle-mediated transport [GO:0006891]; intracellular protein transport [GO:0006886]; organelle transport along microtubule [GO:0072384]; protein secretion [GO:0009306]	COPI vesicle coat [GO:0030126]; endoplasmic reticulum [GO:0005783]; endoplasmic reticulum-Golgi intermediate compartment [GO:0005793]; Golgi membrane [GO:0000139]	structural molecule activity [GO:0005198]
J9VQI0	WT:uggt	TRUE	0.1	0.210912	6.65762	6.95121	0.29359	0	1.22569	CNAG_03283		Large subunit ribosomal protein L24e	cytoplasmic translation [GO:0002181]	cytosolic large ribosomal subunit [GO:0022625]	mRNA binding [GO:0003729]; structural constituent of ribosome [GO:0003735]
J9VNN9	WT:uggt	TRUE	0.1	0.0138012	2.45208	1.77114	-0.680935	0	0.623761	CNAG_05762		Large subunit acidic ribosomal protein P2	cytoplasmic translational elongation [GO:0002182]	cytosolic large ribosomal subunit [GO:0022625]	structural constituent of ribosome [GO:0003735]
J9VMS4	WT:uggt	TRUE	0.7	0.276366	-1.73893	-1.93345	-0.194522	0	0.873862	CNAG_02814		Glycerol-3-phosphate dehydrogenase (EC 1.1.5.3)	glycerol-3-phosphate metabolic process [GO:0006072]	glycerol-3-phosphate dehydrogenase (FAD) complex [GO:0009331]; mitochondrion [GO:0005739]	calcium ion binding [GO:0005509]; glycerol-3-phosphate dehydrogenase (quinone) activity [GO:0004368]
J9VPF5	WT:uggt	TRUE	0.1	0.00757026	4.08389	3.79479	-0.289108	0	0.818408	CNAG_05199		Chaperone DnaK		mitochondrion [GO:0005739]	ATP binding [GO:0005524]; ATP-dependent protein folding chaperone [GO:0140662]; unfolded protein binding [GO:0051082]
J9VQC0	WT:uggt	TRUE	0.4	0.166117	-3.06135	-2.40016	0.66119	0	1.58139	CNAG_02204		Endonuclease (EC 3.1.30.-)	apoptotic DNA fragmentation [GO:0006309]	mitochondrial inner membrane [GO:0005743]; nucleus [GO:0005634]	metal ion binding [GO:0046872]; nucleic acid binding [GO:0003676]; RNA endonuclease activity [GO:0004521]; single-stranded DNA endodeoxyribonuclease activity [GO:0000014]
J9VPZ8	WT:uggt	TRUE	1	0.676171	6.17816	6.28816	0.110006	0	1.07923	CNAG_01455		Large ribosomal subunit protein eL39 (60S ribosomal protein L39)	translation [GO:0006412]	cytosolic large ribosomal subunit [GO:0022625]	structural constituent of ribosome [GO:0003735]
J9VV24	WT:uggt	TRUE	0.7	0.1672	-0.721517	-0.36333	0.358187	0	1.28181	CNAG_01912		Glutamine-dependent NAD(+) synthetase (EC 6.3.5.1) (NAD(+) synthase [glutamine-hydrolyzing])	NAD biosynthetic process [GO:0009435]	cytoplasm [GO:0005737]	ATP binding [GO:0005524]; glutaminase activity [GO:0004359]; NAD+ synthase (glutamine-hydrolyzing) activity [GO:0003952]
J9VKI2	WT:uggt	TRUE	0.1	0.0295747	-2.05523	-1.3044	0.750824	0	1.68275	CNAG_00067		Protein translocase SEC61 complex gamma subunit	post-translational protein targeting to membrane, translocation [GO:0031204]	Ssh1 translocon complex [GO:0071261]	protein transmembrane transporter activity [GO:0008320]
J9VUK6	WT:uggt	TRUE	0.1	0.0259213	1.7866	0.933426	-0.853175	0	0.553565	CNAG_01957		Proteasome subunit beta	proteasome-mediated ubiquitin-dependent protein catabolic process [GO:0043161]	cytoplasm [GO:0005737]; nucleus [GO:0005634]; proteasome core complex, beta-subunit complex [GO:0019774]
J9VVW9	WT:uggt	TRUE	0.1	0.00638429	1.18209	0.503324	-0.678762	0	0.624701	CNAG_04666		26S protease regulatory subunit 8	proteasome-mediated ubiquitin-dependent protein catabolic process [GO:0043161]	cytoplasm [GO:0005737]; nucleus [GO:0005634]; proteasome regulatory particle, base subcomplex [GO:0008540]	ATP binding [GO:0005524]; ATP hydrolysis activity [GO:0016887]; peptidase activity [GO:0008233]; proteasome-activating activity [GO:0036402]
J9VSD3	WT:uggt	TRUE	0.1	0.00940867	-1.59534	-1.09061	0.504726	0	1.41885	CNAG_04453	IPC1	Inositolphosphorylceramide synthase	diacylglycerol biosynthetic process [GO:0006651]; inositol phosphoceramide metabolic process [GO:0006673]; positive regulation of melanin biosynthetic process [GO:0048023]; sphingolipid biosynthetic process [GO:0030148]	inositol phosphoceramide synthase complex [GO:0070916]; membrane [GO:0016020]	inositol phosphoceramide synthase activity [GO:0045140]
J9VM12	WT:uggt	TRUE	0.1	0.00235112	2.20304	1.32592	-0.87712	0	0.544453	CNAG_00605		Cytoplasmic protein			oxidoreductase activity, acting on the CH-CH group of donors, NAD or NADP as acceptor [GO:0016628]
J9VXX2	WT:uggt	TRUE	0.1	0.0242992	-1.83413	-2.30384	-0.469706	0	0.722112	CNAG_03335		ribose-phosphate diphosphokinase (EC 2.7.6.1)	5-phosphoribose 1-diphosphate biosynthetic process [GO:0006015]; fungal-type cell wall organization [GO:0031505]; purine nucleotide biosynthetic process [GO:0006164]; ribonucleoside monophosphate biosynthetic process [GO:0009156]	cytoplasm [GO:0005737]; ribose phosphate diphosphokinase complex [GO:0002189]	ATP binding [GO:0005524]; kinase activity [GO:0016301]; magnesium ion binding [GO:0000287]; ribose phosphate diphosphokinase activity [GO:0004749]
J9VWJ8	WT:uggt	TRUE	0.1	0.0027013	2.03397	1.31408	-0.719897	0	0.607141	CNAG_01586		ATP synthase subunit 4		mitochondrial proton-transporting ATP synthase complex, coupling factor F(o) [GO:0000276]	proton-transporting ATP synthase activity, rotational mechanism [GO:0046933]
J9VDS6	WT:uggt	TRUE	0.1	0.00428621	0.319262	-0.111502	-0.430764	0	0.741869	CNAG_00050		Uncharacterized protein	deoxyribonucleotide catabolic process [GO:0009264]		5'-nucleotidase activity [GO:0008253]
J9VXG0	WT:uggt	TRUE	0.2	0.131306	-3.30969	-3.82304	-0.513353	0	0.700592	CNAG_01900		Nudix hydrolase domain-containing protein	thiamine diphosphate biosynthetic process [GO:0009229]		8-oxo-dGDP phosphatase activity [GO:0044715]; thiamine diphosphokinase activity [GO:0004788]
J9VWQ4	WT:uggt	TRUE	0.1	2.62656e-05	2.93754	2.04943	-0.888109	0	0.540322	CNAG_05826		Eukaryotic peptide chain release factor GTP-binding subunit (ERF-3) (ERF2) (Polypeptide release factor 3) (Translation release factor 3)	nuclear-transcribed mRNA catabolic process, deadenylation-dependent decay [GO:0000288]	translation release factor complex [GO:0018444]	GTP binding [GO:0005525]; GTPase activity [GO:0003924]; translation elongation factor activity [GO:0003746]; translation release factor activity [GO:0003747]
J9VU90	WT:uggt	TRUE	0.1	0.0332202	2.71634	2.35572	-0.360615	0	0.778833	CNAG_01811		DUF1014-domain-containing protein	transcription by RNA polymerase II [GO:0006366]	nucleus [GO:0005634]	transcription coactivator activity [GO:0003713]
J9VI75	WT:uggt	TRUE	0.1	0.0378572	1.18418	0.540611	-0.643564	0	0.64013	CNAG_03598		Ubiquilin	ubiquitin-dependent protein catabolic process [GO:0006511]	cytosol [GO:0005829]	polyubiquitin modification-dependent protein binding [GO:0031593]
J9VI08	WT:uggt	TRUE	0.1	0.0320335	-0.90772	-1.81205	-0.904328	0	0.534281	CNAG_06779		Small nuclear ribonucleoprotein Sm D1 (snRNP core protein D1)	spliceosomal snRNP assembly [GO:0000387]	catalytic step 2 spliceosome [GO:0071013]; commitment complex [GO:0000243]; pICln-Sm protein complex [GO:0034715]; precatalytic spliceosome [GO:0071011]; SMN-Sm protein complex [GO:0034719]; spliceosomal tri-snRNP complex [GO:0097526]; U1 snRNP [GO:0005685]; U12-type spliceosomal complex [GO:0005689]; U2 snRNP [GO:0005686]; U4 snRNP [GO:0005687]; U5 snRNP [GO:0005682]	RNA binding [GO:0003723]
J9VXK6	WT:uggt	TRUE	0.1	0.0100997	-0.0900291	0.523295	0.613324	0	1.52978	CNAG_01951		Small subunit ribosomal protein S22-A	translation [GO:0006412]	cytosolic small ribosomal subunit [GO:0022627]	structural constituent of ribosome [GO:0003735]
J9VS47	WT:uggt	TRUE	0.7	0.811561	0.923563	0.836267	-0.0872954	0	0.941286	CNAG_05267		NADH dehydrogenase (Ubiquinone) Fe-S protein 5	mitochondrial respiratory chain complex I assembly [GO:0032981]	mitochondrial intermembrane space [GO:0005758]; mitochondrial respiratory chain complex I [GO:0005747]
J9VH28	WT:uggt	TRUE	0.1	0.0112206	2.44055	1.73639	-0.70416	0	0.6138	CNAG_03958		Uncharacterized protein		cytoplasm [GO:0005737]
J9VWU5	WT:uggt	TRUE	0.4	0.334462	0.160053	-0.162451	-0.322505	0	0.79968	CNAG_05475		Proteasome subunit alpha type	proteasome-mediated ubiquitin-dependent protein catabolic process [GO:0043161]	cytoplasm [GO:0005737]; nucleus [GO:0005634]; proteasome core complex, alpha-subunit complex [GO:0019773]
J9VWG5	WT:uggt	TRUE	0.1	0.00108581	-2.74503	-2.03698	0.708044	0	1.63359	CNAG_06360		Alcohol dehydrogenase			oxidoreductase activity [GO:0016491]; zinc ion binding [GO:0008270]
J9VZX9	WT:uggt	TRUE	0.1	0.0252527	-2.70395	-2.0719	0.632049	0	1.54976	CNAG_05579		RNA-binding protein	mRNA splicing, via spliceosome [GO:0000398]	nucleus [GO:0005634]	RNA binding [GO:0003723]
J9VJV4	WT:uggt	TRUE	0.1	0.000435076	0.462739	-0.38348	-0.846219	0	0.55624	CNAG_01395		Ribose-5-phosphate isomerase (EC 5.3.1.6) (D-ribose-5-phosphate ketol-isomerase) (Phosphoriboisomerase)	D-ribose metabolic process [GO:0006014]; pentose-phosphate shunt, non-oxidative branch [GO:0009052]	cytosol [GO:0005829]; intracellular membrane-bounded organelle [GO:0043231]	ribose-5-phosphate isomerase activity [GO:0004751]
J9VPG2	WT:uggt	TRUE	0.1	0.0374913	-1.69205	-2.34349	-0.651445	0	0.636642	CNAG_05824		WD-repeat protein 68		nucleus [GO:0005634]
J9VML6	WT:uggt	TRUE	0.1	0.0104619	1.61381	1.16673	-0.447085	0	0.733523	CNAG_02091		Nucleosome assembly protein 1-like 1	nucleosome assembly [GO:0006334]	chromatin [GO:0000785]; nucleus [GO:0005634]	chromatin binding [GO:0003682]; histone binding [GO:0042393]
J9VR72	WT:uggt	TRUE	0.1	0.0126409	-2.39074	-1.53499	0.855755	0	1.80971	CNAG_04954		Enhancer of mRNA-decapping protein 4	deadenylation-independent decapping of nuclear-transcribed mRNA [GO:0031087]	P-body [GO:0000932]
J9VX92	WT:uggt	TRUE	0.1	0.00943715	2.05214	1.76221	-0.289931	0	0.817941	CNAG_01810		DNA-directed RNA polymerase subunit	termination of RNA polymerase I transcription [GO:0006363]	RNA polymerase I complex [GO:0005736]	nucleic acid binding [GO:0003676]; RNA polymerase I activity [GO:0001054]; zinc ion binding [GO:0008270]
J9VH09	WT:uggt	TRUE	0.1	0.00207185	0.938569	0.0145132	-0.924056	0	0.527025	CNAG_02995		RNA-binding protein with serine-rich domain 1	mRNA splicing, via spliceosome [GO:0000398]	ASAP complex [GO:0061574]; cytoplasm [GO:0005737]; nucleoplasm [GO:0005654]	RNA binding [GO:0003723]
J9VUS1	WT:uggt	TRUE	0.1	0.0351482	0.836884	1.39477	0.557888	0	1.47211	CNAG_01796		Uncharacterized protein
J9VIB7	WT:uggt	TRUE	0.1	0.129257	-1.21966	-1.74432	-0.524666	0	0.69512	CNAG_03646		1-(5-phosphoribosyl)-5-[(5-phosphoribosylamino)methylideneamino] imidazole-4-carboxamide isomerase (EC 5.3.1.16) (5-proFAR isomerase) (Phosphoribosylformimino-5-aminoimidazole carboxamide ribotide isomerase)	histidine biosynthetic process [GO:0000105]; tryptophan biosynthetic process [GO:0000162]	cytoplasm [GO:0005737]	1-(5-phosphoribosyl)-5-[(5-phosphoribosylamino)methylideneamino]imidazole-4-carboxamide isomerase activity [GO:0003949]
J9VKT1	WT:uggt	TRUE	0.1	6.36819e-05	2.22014	1.22638	-0.993758	0	0.502168	CNAG_02655		Isomerase YbhE			6-phosphogluconolactonase activity [GO:0017057]
J9VM11	WT:uggt	TRUE	0.1	0.054677	-0.390784	0.315467	0.706251	0	1.63156	CNAG_03061		Multiple drug resistance protein	xenobiotic detoxification by transmembrane export across the plasma membrane [GO:1990961]	plasma membrane [GO:0005886]	sodium:proton antiporter activity [GO:0015385]
J9W1P7	WT:uggt	TRUE	0.1	0.00374421	1.3693	1.71687	0.347565	0	1.27241	CNAG_05473		Rrp15p-domain-containing protein	maturation of 5.8S rRNA [GO:0000460]; maturation of LSU-rRNA [GO:0000470]	preribosome, large subunit precursor [GO:0030687]
J9W443	WT:uggt	TRUE	0.2	0.0958575	-3.77771	-4.2271	-0.449388	0	0.732354	CNAG_05568		Septum formation protein Maf			nucleoside triphosphate diphosphatase activity [GO:0047429]
J9VG16	WT:uggt	TRUE	0.7	0.745347	0.644617	0.584363	-0.0602539	0	0.959095	CNAG_03816		Proteasome subunit beta	proteasome-mediated ubiquitin-dependent protein catabolic process [GO:0043161]	cytoplasm [GO:0005737]; nucleus [GO:0005634]; proteasome core complex, beta-subunit complex [GO:0019774]	threonine-type endopeptidase activity [GO:0004298]
J9VQM5	WT:uggt	TRUE	0.4	0.215968	-0.720961	-1.06027	-0.339309	0	0.79042	CNAG_02097		UBX domain-containing protein	glucose homeostasis [GO:0042593]; intracellular protein transport [GO:0006886]	cytoplasm [GO:0005737]; nucleus [GO:0005634]; vesicle membrane [GO:0012506]
J9VG29	WT:uggt	TRUE	0.1	0.0617588	-2.11985	-1.14165	0.9782	0	1.97001	CNAG_06742		Pre-60S factor REI1	ribosomal large subunit biogenesis [GO:0042273]	cytoplasm [GO:0005737]; preribosome, large subunit precursor [GO:0030687]	nucleic acid binding [GO:0003676]; zinc ion binding [GO:0008270]
J9VI51	WT:uggt	TRUE	0.7	0.869448	-1.6208	-1.5914	0.0293964	0	1.02059	CNAG_02575		RAB small monomeric GTPase	regulation of vacuole fusion, non-autophagic [GO:0032889]	fungal-type vacuole membrane [GO:0000329]; late endosome [GO:0005770]	GTP binding [GO:0005525]; GTPase activity [GO:0003924]
J9VX79	WT:uggt	TRUE	0.1	0.00138465	1.44626	0.818257	-0.628001	0	0.647072	CNAG_01794		2-hydroxyacid dehydrogenase			NAD binding [GO:0051287]; oxidoreductase activity, acting on the CH-OH group of donors, NAD or NADP as acceptor [GO:0016616]
J9VMZ0	WT:uggt	TRUE	0.2	0.0748079	3.56766	3.17056	-0.397101	0	0.759382	CNAG_06745		Histone H3		nucleosome [GO:0000786]; nucleus [GO:0005634]	DNA binding [GO:0003677]; protein heterodimerization activity [GO:0046982]; structural constituent of chromatin [GO:0030527]
J9VRA2	WT:uggt	TRUE	0.7	0.995182	-2.96623	-2.96274	0.00349075	0	1.00242	CNAG_03582		pH-response regulator protein palA/RIM20	early endosome to late endosome transport [GO:0045022]; endocytic recycling [GO:0032456]; protein transport to vacuole involved in ubiquitin-dependent protein catabolic process via the multivesicular body sorting pathway [GO:0043328]	endosome [GO:0005768]
J9VTJ3	WT:uggt	TRUE	0.1	0.00594841	4.39028	4.61641	0.226134	0	1.1697	CNAG_04637		Multiprotein-bridging factor 1		nucleus [GO:0005634]	DNA binding [GO:0003677]
J9VSL1	WT:uggt	TRUE	0.1	0.0112336	6.42099	6.04149	-0.379505	0	0.768701	CNAG_04799		Large subunit ribosomal protein L14e	ribosomal large subunit biogenesis [GO:0042273]; translation [GO:0006412]	cytosolic large ribosomal subunit [GO:0022625]	RNA binding [GO:0003723]; structural constituent of ribosome [GO:0003735]
J9VWV9	WT:uggt	TRUE	0.1	0.129462	-0.361022	0.294393	0.655415	0	1.57507	CNAG_05502		DUF1996 domain-containing protein		membrane [GO:0016020]
J9VTP5	WT:uggt	TRUE	0.1	0.0500367	-0.482222	-0.713677	-0.231454	0	0.851776	CNAG_03567		non-specific serine/threonine protein kinase (EC 2.7.11.1)	intracellular signal transduction [GO:0035556]		ATP binding [GO:0005524]; protein serine/threonine kinase activity [GO:0004674]
J9W2N9	WT:uggt	TRUE	0.1	0.0948262	1.45955	0.916079	-0.543468	0	0.68612	CNAG_06153		26S protease regulatory subunit 6A-B	proteasome-mediated ubiquitin-dependent protein catabolic process [GO:0043161]	cytoplasm [GO:0005737]; nucleus [GO:0005634]; proteasome regulatory particle, base subcomplex [GO:0008540]	ATP binding [GO:0005524]; ATP hydrolysis activity [GO:0016887]; peptidase activity [GO:0008233]; proteasome-activating activity [GO:0036402]
J9VRM3	WT:uggt	TRUE	0.4	0.110105	1.37964	1.08281	-0.296825	0	0.814042	CNAG_05100		ENTH domain-containing protein c	endocytosis [GO:0006897]; Golgi to endosome transport [GO:0006895]	clathrin vesicle coat [GO:0030125]; cytosol [GO:0005829]; endosome [GO:0005768]; plasma membrane [GO:0005886]	clathrin binding [GO:0030276]; phospholipid binding [GO:0005543]
J9VSY9	WT:uggt	TRUE	0.7	0.689178	-3.50767	-3.99992	-0.492246	0	0.710918	CNAG_04842		Uncharacterized protein
J9VI43	WT:uggt	TRUE	1	0.536784	0.962278	1.13208	0.169797	0	1.1249	CNAG_02585		VWFA domain-containing protein
J9VKC0	WT:uggt	TRUE	0.1	0.00217517	0.971877	0.182067	-0.78981	0	0.57842	CNAG_00012		D-xylose 1-dehydrogenase (NADP(+), D-xylono-1,5-lactone-forming) (EC 1.1.1.179) (D-xylose-NADP dehydrogenase)	D-xylose catabolic process [GO:0042843]		D-xylose 1-dehydrogenase (NADP+) activity [GO:0047837]; nucleotide binding [GO:0000166]
J9VHT4	WT:uggt	TRUE	0.1	3.37703e-05	2.08441	3.07322	0.988808	0	1.98454	CNAG_00040		Cytochrome P450, family 51 (Sterol 14-demethylase)	bile acid biosynthetic process [GO:0006699]; cholesterol homeostasis [GO:0042632]; methylation [GO:0032259]	membrane [GO:0016020]	heme binding [GO:0020037]; iron ion binding [GO:0005506]; methyltransferase activity [GO:0008168]; oxysterol 7-alpha-hydroxylase activity [GO:0008396]; steroid 7-alpha-hydroxylase activity [GO:0008387]
J9VSX3	WT:uggt	TRUE	0.2	0.0964387	1.26814	1.63047	0.36233	0	1.2855	CNAG_04676		ATP-dependent 6-phosphofructokinase (ATP-PFK) (Phosphofructokinase) (EC 2.7.1.11) (Phosphohexokinase)	canonical glycolysis [GO:0061621]; fructose 1,6-bisphosphate metabolic process [GO:0030388]; fructose 6-phosphate metabolic process [GO:0006002]	6-phosphofructokinase complex [GO:0005945]; membrane [GO:0016020]; mitochondrion [GO:0005739]	6-phosphofructokinase activity [GO:0003872]; AMP binding [GO:0016208]; ATP binding [GO:0005524]; fructose-6-phosphate binding [GO:0070095]; identical protein binding [GO:0042802]; metal ion binding [GO:0046872]; monosaccharide binding [GO:0048029]
J9VKI7	WT:uggt	TRUE	0.1	0.00567691	0.927905	1.80832	0.880417	0	1.84091	CNAG_02761		Inorganic phosphate transporter pho88	protein targeting to ER [GO:0045047]	endoplasmic reticulum [GO:0005783]; membrane [GO:0016020]; mitochondrion [GO:0005739]
J9VGN1	WT:uggt	TRUE	0.2	0.118063	0.819917	0.97788	0.157963	0	1.11571	CNAG_00361		BAR-domain-containing protein	actin cortical patch localization [GO:0051666]; endocytosis [GO:0006897]; plasma membrane tubulation [GO:0097320]	actin cortical patch [GO:0030479]; mating projection tip [GO:0043332]; medial cortex [GO:0031097]; Rvs161p-Rvs167p complex [GO:1990528]	lipid binding [GO:0008289]
J9VRC6	WT:uggt	TRUE	0.1	4.47865e-05	2.4799	1.51456	-0.965333	0	0.51216	CNAG_04272		CAMK/CAMK1 protein kinase	cellular response to oxidative stress [GO:0034599]		ATP binding [GO:0005524]; calmodulin binding [GO:0005516]; calmodulin-dependent protein kinase activity [GO:0004683]
J9VWG3	WT:uggt	TRUE	0.1	0.00915073	1.8951	1.10591	-0.789191	0	0.578669	CNAG_04192		phosphoribosylformylglycinamidine synthase (EC 6.3.5.3) (Formylglycinamide ribonucleotide amidotransferase) (Formylglycinamide ribotide amidotransferase)	'de novo' IMP biosynthetic process [GO:0006189]; glutamine metabolic process [GO:0006541]		ATP binding [GO:0005524]; metal ion binding [GO:0046872]; phosphoribosylformylglycinamidine synthase activity [GO:0004642]
J9VIG4	WT:uggt	TRUE	0.1	0.000488233	0.685422	-0.242088	-0.927511	0	0.525765	CNAG_04977		Pre-mRNA branch site protein p14	positive regulation of mRNA splicing, via spliceosome [GO:0048026]	spliceosomal complex [GO:0005681]	RNA binding [GO:0003723]
J9VFY8	WT:uggt	TRUE	0.1	0.0834688	3.94242	3.40541	-0.537012	0	0.689197	CNAG_03780		Small subunit ribosomal protein S16	maturation of SSU-rRNA from tricistronic rRNA transcript (SSU-rRNA, 5.8S rRNA, LSU-rRNA) [GO:0000462]; translation [GO:0006412]	cytosolic small ribosomal subunit [GO:0022627]	RNA binding [GO:0003723]; structural constituent of ribosome [GO:0003735]
J9VTC1	WT:uggt	TRUE	0.1	0.00560208	3.96061	4.9124	0.951789	0	1.93427	CNAG_04726		60S ribosomal protein L20	translation [GO:0006412]	cytosolic large ribosomal subunit [GO:0022625]	structural constituent of ribosome [GO:0003735]
J9VIM6	WT:uggt	TRUE	0.1	0.0031343	-2.59373	-3.44607	-0.85234	0	0.553885	CNAG_00290		Peptide hydrolase (EC 3.4.-.-)	proteolysis [GO:0006508]		aminopeptidase activity [GO:0004177]; metal ion binding [GO:0046872]; metalloexopeptidase activity [GO:0008235]
J9W358	WT:uggt	TRUE	0.1	0.00371512	2.81869	3.61874	0.800047	0	1.74116	CNAG_06377		Solute carrier family 25 (Mitochondrial phosphate transporter), member 3	mitochondrial phosphate ion transmembrane transport [GO:1990547]	mitochondrial inner membrane [GO:0005743]	phosphate transmembrane transporter activity [GO:0005315]
J9VRV0	WT:uggt	TRUE	0.1	2.87828e-05	1.9529	0.971647	-0.98125	0	0.506541	CNAG_05140		Methylenetetrahydrofolate reductase	methionine biosynthetic process [GO:0009086]; tetrahydrofolate interconversion [GO:0035999]	cytosol [GO:0005829]	FAD binding [GO:0071949]; methylenetetrahydrofolate reductase (NAD(P)H) activity [GO:0004489]
J9VNR7	WT:uggt	TRUE	1	0.603619	-3.21051	-2.99301	0.217496	0	1.16271	CNAG_05798	SRP9	Signal recognition particle subunit SRP9	SRP-dependent cotranslational protein targeting to membrane [GO:0006614]	signal recognition particle, endoplasmic reticulum targeting [GO:0005786]	7S RNA binding [GO:0008312]
J9VIA6	WT:uggt	TRUE	0.1	0.0297954	4.30419	3.80072	-0.503476	0	0.705405	CNAG_02794		Dihydroorotate dehydrogenase (quinone), mitochondrial (DHOdehase) (EC 1.3.5.2)	'de novo' pyrimidine nucleobase biosynthetic process [GO:0006207]; 'de novo' UMP biosynthetic process [GO:0044205]	mitochondrial inner membrane [GO:0005743]; plasma membrane [GO:0005886]	dihydroorotate dehydrogenase (quinone) activity [GO:0106430]
J9VV50	WT:uggt	TRUE	0.1	0.00134622	2.61311	3.25454	0.641423	0	1.55987	CNAG_07839		Large subunit ribosomal protein L11	translation [GO:0006412]	cytosolic large ribosomal subunit [GO:0022625]	RNA binding [GO:0003723]; structural constituent of ribosome [GO:0003735]
J9W1K2	WT:uggt	TRUE	0.1	0.0478242	2.3158	1.90879	-0.407014	0	0.754182	CNAG_01753		Uncharacterized protein
Q8TG24	WT:uggt	TRUE	0.1	0.0548247	2.2771	1.95005	-0.327049	0	0.797165	CNAG_04215	MET3	Sulfate adenylyltransferase (EC 2.7.7.4) (ATP-sulfurylase) (Sulfate adenylate transferase) (SAT)	cysteine biosynthetic process [GO:0019344]; hydrogen sulfide biosynthetic process [GO:0070814]; methionine biosynthetic process [GO:0009086]; sulfate assimilation via adenylyl sulfate reduction [GO:0010134]; sulfate assimilation, phosphoadenylyl sulfate reduction by phosphoadenylyl-sulfate reductase (thioredoxin) [GO:0019379]	cytoplasm [GO:0005737]	adenylylsulfate kinase activity [GO:0004020]; ATP binding [GO:0005524]; sulfate adenylyltransferase (ATP) activity [GO:0004781]
J9VKW0	WT:uggt	TRUE	0.4	0.308526	0.171703	0.106699	-0.0650045	0	0.955942	CNAG_01035		Proteasome subunit alpha type	proteasomal protein catabolic process [GO:0010498]; ubiquitin-dependent protein catabolic process [GO:0006511]	cytosol [GO:0005829]; nucleus [GO:0005634]; proteasome core complex, alpha-subunit complex [GO:0019773]; proteasome core complex, beta-subunit complex [GO:0019774]	endopeptidase activity [GO:0004175]
J9VKH7	WT:uggt	TRUE	0.1	0.00163262	1.91874	1.17122	-0.747521	0	0.595626	CNAG_00062		26S proteasome regulatory subunit N3	regulation of protein catabolic process [GO:0042176]; ubiquitin-dependent protein catabolic process [GO:0006511]	proteasome regulatory particle, lid subcomplex [GO:0008541]	enzyme regulator activity [GO:0030234]
J9W232	WT:uggt	TRUE	0.1	0.000889694	2.01257	1.59316	-0.419408	0	0.747731	CNAG_05653		Malate synthase (EC 2.3.3.9)	glyoxylate cycle [GO:0006097]; tricarboxylic acid cycle [GO:0006099]	peroxisomal matrix [GO:0005782]	malate synthase activity [GO:0004474]
J9VY55	WT:uggt	TRUE	0.7	0.657032	-0.215603	-0.190251	0.0253514	0	1.01773	CNAG_06121		J domain-containing protein	chaperone-mediated protein folding [GO:0061077]	cytoplasm [GO:0005737]; nucleus [GO:0005634]	protein folding chaperone [GO:0044183]; protein-folding chaperone binding [GO:0051087]; unfolded protein binding [GO:0051082]
J9VN71	WT:uggt	TRUE	0.7	0.60992	2.17963	2.19972	0.0200858	0	1.01402	CNAG_06606		Rho family protein	small GTPase-mediated signal transduction [GO:0007264]	cytosol [GO:0005829]	GTP binding [GO:0005525]; GTPase activity [GO:0003924]; protein kinase binding [GO:0019901]
J9VJG1	WT:uggt	TRUE	0.2	0.0919694	-4.21938	-3.03599	1.18339	0	2.2711	CNAG_05098		Ubiquitin-like modifier HUB1	mRNA splicing, via spliceosome [GO:0000398]; protein modification process [GO:0036211]	cytoplasm [GO:0005737]; nucleus [GO:0005634]	protein tag activity [GO:0031386]
J9VR32	WT:uggt	TRUE	0.2	0.173333	0.602368	0.918846	0.316478	0	1.24529	CNAG_06919		rRNA 2'-O-methyltransferase fibrillarin (Histone-glutamine methyltransferase)	box C/D sno(s)RNA 3'-end processing [GO:0000494]	box C/D methylation guide snoRNP complex [GO:0031428]; Cajal body [GO:0015030]; nucleolus [GO:0005730]; nucleus [GO:0005634]; small-subunit processome [GO:0032040]	histone H2AQ104 methyltransferase activity [GO:1990259]; RNA binding [GO:0003723]; rRNA methyltransferase activity [GO:0008649]
J9VDS7	WT:uggt	TRUE	1	0.826326	2.67401	2.70283	0.0288221	0	1.02018	CNAG_00293		small monomeric GTPase (EC 3.6.5.2)	Ras protein signal transduction [GO:0007265]	plasma membrane [GO:0005886]	GDP binding [GO:0019003]; GTP binding [GO:0005525]; GTPase activity [GO:0003924]
J9VQ72	WT:uggt	TRUE	1	0.978125	-0.18479	-0.175649	0.00914143	0	1.00636	CNAG_03399		SIT4-associating protein/190		cytosol [GO:0005829]; nucleus [GO:0005634]	protein phosphatase binding [GO:0019903]; protein phosphatase regulator activity [GO:0019888]
J9VJY1	WT:uggt	TRUE	0.4	0.298412	0.467537	0.739479	0.271942	0	1.20743	CNAG_00754		ATP-binding cassette, sub-family E, member 1	ribosomal subunit export from nucleus [GO:0000054]; translational initiation [GO:0006413]; translational termination [GO:0006415]		ATP binding [GO:0005524]; ATP hydrolysis activity [GO:0016887]; iron ion binding [GO:0005506]; ribosomal small subunit binding [GO:0043024]
J9VL81	WT:uggt	TRUE	0.7	0.56933	-3.24592	-3.61646	-0.370538	0	0.773494	CNAG_00888		Calcineurin subunit B (Calcineurin regulatory subunit) (Protein phosphatase 2B regulatory subunit)	calcineurin-mediated signaling [GO:0097720]	calcineurin complex [GO:0005955]	calcium ion binding [GO:0005509]; calcium-dependent protein serine/threonine phosphatase regulator activity [GO:0008597]; phosphatase binding [GO:0019902]
J9VLH9	WT:uggt	TRUE	0.1	0.00375572	6.24418	6.99412	0.749946	0	1.68173	CNAG_00407	GOX1	Glyoxal oxidase
J9W0Q3	WT:uggt	TRUE	0.1	0.00214477	1.19584	0.740054	-0.455782	0	0.729115	CNAG_06299		Fungal-type protein kinase domain-containing protein
J9VNC2	WT:uggt	TRUE	0.1	0.0124118	1.158	0.770027	-0.38797	0	0.764204	CNAG_01240		Fungal-type protein kinase domain-containing protein
J9VIY8	WT:uggt	TRUE	0.1	0.0160746	-0.825634	-1.36732	-0.541685	0	0.686968	CNAG_05122		Homoserine O-acetyltransferase	homoserine metabolic process [GO:0009092]; methionine biosynthetic process [GO:0009086]		homoserine O-acetyltransferase activity [GO:0004414]
J9W0X6	WT:uggt	TRUE	0.1	4.58172e-05	2.34687	3.32018	0.973314	0	1.96335	CNAG_06381		DUF221-domain-containing protein		plasma membrane [GO:0005886]	calcium-activated cation channel activity [GO:0005227]
J9VJ21	WT:uggt	TRUE	0.1	0.00905509	2.88701	3.05922	0.17221	0	1.12678	CNAG_03891		Hsp60-like protein	apoptotic mitochondrial changes [GO:0008637]; chaperone cofactor-dependent protein refolding [GO:0051085]; mitochondrial unfolded protein response [GO:0034514]; positive regulation of interferon-alpha production [GO:0032727]; positive regulation of interleukin-6 production [GO:0032755]; positive regulation of T cell activation [GO:0050870]; positive regulation of type II interferon production [GO…	GroEL-GroES complex [GO:1990220]; mitochondrial inner membrane [GO:0005743]; mitochondrial matrix [GO:0005759]	ATP binding [GO:0005524]; ATP-dependent protein folding chaperone [GO:0140662]; protein-folding chaperone binding [GO:0051087]; unfolded protein binding [GO:0051082]
J9W2I2	WT:uggt	TRUE	0.7	0.406156	-1.6419	-1.98745	-0.345549	0	0.787008	CNAG_07904		DNA polymerase epsilon subunit D (DNA polymerase II subunit D)	DNA damage response [GO:0006974]; heterochromatin formation [GO:0031507]; leading strand elongation [GO:0006272]	CHRAC [GO:0008623]; epsilon DNA polymerase complex [GO:0008622]	chromatin DNA binding [GO:0031490]; protein heterodimerization activity [GO:0046982]
T2BMP7	WT:uggt	TRUE	0.1	0.0449381	-1.67446	-1.15476	0.519696	0	1.43365	CNAG_02174		Signal recognition particle 54 kDa protein	SRP-dependent cotranslational protein targeting to membrane, translocation [GO:0006616]	cytosol [GO:0005829]; endoplasmic reticulum [GO:0005783]; signal recognition particle, endoplasmic reticulum targeting [GO:0005786]	7S RNA binding [GO:0008312]; ATP hydrolysis activity [GO:0016887]; endoplasmic reticulum signal peptide binding [GO:0030942]; GTP binding [GO:0005525]; GTPase activity [GO:0003924]
J9VWH3	WT:uggt	TRUE	0.1	0.0516304	-3.04585	-3.68791	-0.642055	0	0.640799	CNAG_05732		MARVEL domain-containing protein		membrane [GO:0016020]
J9VN06	WT:uggt	TRUE	0.1	0.00163398	1.23793	1.90561	0.667687	0	1.58852	CNAG_07427		non-specific serine/threonine protein kinase (EC 2.7.11.1)	endocytosis [GO:0006897]; non-motile cilium assembly [GO:1905515]; positive regulation of proteasomal ubiquitin-dependent protein catabolic process [GO:0032436]; regulation of circadian rhythm [GO:0042752]; signal transduction [GO:0007165]; spindle assembly [GO:0051225]	cytoplasm [GO:0005737]; nucleus [GO:0005634]; spindle microtubule [GO:0005876]	ATP binding [GO:0005524]; protein serine/threonine kinase activity [GO:0004674]
J9VQB5	WT:uggt	TRUE	0.1	0.00441604	0.349223	0.992832	0.643609	0	1.56223	CNAG_02209		Nucleolar protein 56		box C/D methylation guide snoRNP complex [GO:0031428]; nucleolus [GO:0005730]; small-subunit processome [GO:0032040]	snoRNA binding [GO:0030515]
J9VFF9	WT:uggt	TRUE	0.1	0.00153044	-2.55392	-1.5912	0.962715	0	1.94897	CNAG_00699		Transmembrane receptor
J9VHY9	WT:uggt	TRUE	0.1	0.0581949	-4.90912	-3.2492	1.65992	0	3.15998	CNAG_07538		Calcium/proton exchanger	intracellular calcium ion homeostasis [GO:0006874]	fungal-type vacuole membrane [GO:0000329]	calcium:proton antiporter activity [GO:0015369]
J9VP27	WT:uggt	TRUE	0.7	0.760651	0.187137	0.262152	0.0750156	0	1.05337	CNAG_03920		Isocitrate dehydrogenase [NADP] (EC 1.1.1.42)	isocitrate metabolic process [GO:0006102]; NADP metabolic process [GO:0006739]; tricarboxylic acid cycle [GO:0006099]	cytosol [GO:0005829]; mitochondrion [GO:0005739]; peroxisome [GO:0005777]	isocitrate dehydrogenase (NADP+) activity [GO:0004450]; magnesium ion binding [GO:0000287]; NAD binding [GO:0051287]
J9VMN1	WT:uggt	TRUE	0.2	0.158982	-2.06957	-1.86531	0.204258	0	1.15209	CNAG_01437		KRR1 small subunit processome component (KRR-R motif-containing protein 1)	rRNA processing [GO:0006364]	nucleolus [GO:0005730]; small-subunit processome [GO:0032040]	RNA binding [GO:0003723]
J9VWL8	WT:uggt	TRUE	0.1	0.0331759	1.00839	1.33158	0.32319	0	1.25109	CNAG_04259		H/ACA ribonucleoprotein complex subunit	snoRNA guided rRNA pseudouridine synthesis [GO:0000454]	box H/ACA snoRNP complex [GO:0031429]	box H/ACA snoRNA binding [GO:0034513]
J9VQC8	WT:uggt	TRUE	0.1	0.0601719	-1.07327	-0.579847	0.493422	0	1.40778	CNAG_02194		non-specific serine/threonine protein kinase (EC 2.7.11.1)	intracellular signal transduction [GO:0035556]	spindle pole body [GO:0005816]	ATP binding [GO:0005524]; protein serine/threonine kinase activity [GO:0004674]
J9VXY3	WT:uggt	TRUE	1	0.490455	1.23961	1.32295	0.0833395	0	1.05947	CNAG_04753		Gluconolactonase
J9VS64	WT:uggt	TRUE	0.1	0.0253295	3.48323	2.98015	-0.503084	0	0.705597	CNAG_02404		Nuclear segregation protein Bfr1	intracellular mRNA localization [GO:0008298]	endoplasmic reticulum [GO:0005783]; nuclear outer membrane-endoplasmic reticulum membrane network [GO:0042175]; ribonucleoprotein complex [GO:1990904]	mRNA binding [GO:0003729]
Q9P8P2	WT:uggt	TRUE	0.7	0.772916	2.4551	2.20572	-0.249377	0	0.841259	CNAG_06085	PLB1	Phospholipase B (EC 3.1.1.5) (Lysophospholipase)	glycerophospholipid catabolic process [GO:0046475]	cytosol [GO:0005829]; extracellular region [GO:0005576]; intracellular membrane-bounded organelle [GO:0043231]; plasma membrane [GO:0005886]	lysophospholipase activity [GO:0004622]; phosphatidyl phospholipase B activity [GO:0102545]; phospholipase A2 activity [GO:0004623]
J9VQG8	WT:uggt	TRUE	0.1	0.0405572	-0.300088	0.430685	0.730773	0	1.65953	CNAG_03267		Splicing factor 3B subunit 2		U12-type spliceosomal complex [GO:0005689]
J9VVV4	WT:uggt	TRUE	0.2	0.182779	-0.346616	-0.0425955	0.30402	0	1.23458	CNAG_04687		Stearoyl-CoA desaturase (Delta-9 desaturase)	unsaturated fatty acid biosynthetic process [GO:0006636]	endoplasmic reticulum membrane [GO:0005789]	16:0 monogalactosyldiacylglycerol desaturase activity [GO:0009979]; heme binding [GO:0020037]; iron ion binding [GO:0005506]; stearoyl-CoA 9-desaturase activity [GO:0004768]
J9VX07	WT:uggt	TRUE	0.1	0.000353056	1.76995	1.98062	0.210677	0	1.15723	CNAG_04439		Vacuolar proton pump subunit B (V-ATPase subunit B) (Vacuolar proton pump subunit B)	ATP metabolic process [GO:0046034]; vacuolar acidification [GO:0007035]	proton-transporting V-type ATPase, V1 domain [GO:0033180]	ATP binding [GO:0005524]; proton-transporting ATPase activity, rotational mechanism [GO:0046961]
J9VER4	WT:uggt	TRUE	0.2	0.164829	0.585001	0.801152	0.216151	0	1.16163	CNAG_00410		RRM domain-containing protein			RNA binding [GO:0003723]
J9VTV3	WT:uggt	TRUE	0.4	0.379488	1.16228	1.08199	-0.0802892	0	0.945868	CNAG_00992		homocitrate synthase (EC 2.3.3.14)	lysine biosynthetic process via aminoadipic acid [GO:0019878]	mitochondrion [GO:0005739]	homocitrate synthase activity [GO:0004410]
J9VXQ3	WT:uggt	TRUE	0.1	0.0739591	2.99386	2.15775	-0.836106	0	0.560153	CNAG_03249		THO complex subunit 4	poly(A)+ mRNA export from nucleus [GO:0016973]	nuclear speck [GO:0016607]	mRNA binding [GO:0003729]
J9VLI1	WT:uggt	TRUE	0.2	0.112246	0.600621	0.227846	-0.372775	0	0.772296	CNAG_02492		Peptidyl-prolyl cis-trans isomerase (PPIase) (EC 5.2.1.8)	protein folding [GO:0006457]	catalytic step 2 spliceosome [GO:0071013]	peptidyl-prolyl cis-trans isomerase activity [GO:0003755]
J9VT51	WT:uggt	TRUE	0.1	0.00110629	2.36943	2.70429	0.334868	0	1.26126	CNAG_04803	SEC31	Protein transport protein SEC31 (Protein transport protein sec31)	COPII-coated vesicle cargo loading [GO:0090110]; endoplasmic reticulum organization [GO:0007029]; intracellular protein transport [GO:0006886]	COPII vesicle coat [GO:0030127]; endoplasmic reticulum exit site [GO:0070971]	structural molecule activity [GO:0005198]
J9VWG9	WT:uggt	TRUE	0.1	0.000112323	0.279305	-0.203453	-0.482758	0	0.715608	CNAG_05395		CNH domain-containing protein	autophagy [GO:0006914]; endosomal vesicle fusion [GO:0034058]; intracellular protein transport [GO:0006886]	fungal-type vacuole membrane [GO:0000329]
J9VWD3	WT:uggt	TRUE	0.7	0.533667	2.78705	2.86643	0.0793806	0	1.05656	CNAG_01526		Cleavage and polyadenylation specificity factor subunit 4	protein polyubiquitination [GO:0000209]		metal ion binding [GO:0046872]; ubiquitin protein ligase activity [GO:0061630]
J9VFR1	WT:uggt	TRUE	0.7	0.759363	-0.149159	-0.101156	0.0480036	0	1.03383	CNAG_00772		UV excision repair protein RAD23	nucleotide-excision repair [GO:0006289]; proteasome-mediated ubiquitin-dependent protein catabolic process [GO:0043161]	cytosol [GO:0005829]; nucleoplasm [GO:0005654]	damaged DNA binding [GO:0003684]; polyubiquitin modification-dependent protein binding [GO:0031593]; proteasome binding [GO:0070628]; ubiquitin binding [GO:0043130]
J9VTP3	WT:uggt	TRUE	0.4	0.288856	-1.61977	-0.995573	0.624193	0	1.54135	CNAG_04587		Uncharacterized protein
T2BP94	WT:uggt	TRUE	0.4	0.121949	0.263722	0.819917	0.556196	0	1.47039	CNAG_03679		acylphosphatase (EC 3.6.1.7)			acylphosphatase activity [GO:0003998]
J9VR76	WT:uggt	TRUE	0.1	0.000791488	0.896253	1.53939	0.643139	0	1.56172	CNAG_04209		Voltage-gated potassium channel protein beta-2 subunit	monoatomic ion transmembrane transport [GO:0034220]; regulation of potassium ion transmembrane transport [GO:1901379]	voltage-gated potassium channel complex [GO:0008076]	aldo-keto reductase (NADPH) activity [GO:0004033]; potassium channel regulator activity [GO:0015459]; transmembrane transporter binding [GO:0044325]
J9VMZ4	WT:uggt	TRUE	0.4	0.171037	0.979693	1.30846	0.328763	0	1.25594	CNAG_06740		Septation protein imp2	actin filament polymerization [GO:0030041]; vesicle organization [GO:0016050]	actin filament [GO:0005884]; mitotic actomyosin contractile ring, proximal layer [GO:0120104]; plasma membrane [GO:0005886]; vesicle [GO:0031982]	actin filament binding [GO:0051015]; microtubule binding [GO:0008017]; phospholipid binding [GO:0005543]
J9VVL6	WT:uggt	TRUE	0.2	0.148203	1.90168	1.46741	-0.434277	0	0.740065	CNAG_03435		13 kDa ribonucleoprotein-associated protein	maturation of LSU-rRNA [GO:0000470]; maturation of SSU-rRNA [GO:0030490]; mRNA splicing, via spliceosome [GO:0000398]	box C/D methylation guide snoRNP complex [GO:0031428]; cytosolic large ribosomal subunit [GO:0022625]; nucleolus [GO:0005730]; precatalytic spliceosome [GO:0071011]; small-subunit processome [GO:0032040]; U4/U6 x U5 tri-snRNP complex [GO:0046540]	RNA binding [GO:0003723]
J9W0Y8	WT:uggt	TRUE	0.1	0.194273	-0.931272	-2.11765	-1.18638	0	0.439405	CNAG_06395		Uncharacterized protein
J9VUU0	WT:uggt	TRUE	0.4	0.406645	0.908001	1.49115	0.583152	0	1.49812	CNAG_04461		ATP-dependent DNA helicase HFM1/MER3		nucleus [GO:0005634]	ATP binding [GO:0005524]; helicase activity [GO:0004386]; hydrolase activity [GO:0016787]; nucleic acid binding [GO:0003676]
J9VNV1	WT:uggt	TRUE	0.1	0.0760243	1.49919	1.85492	0.355732	0	1.27963	CNAG_06612		Sde2 N-terminal ubiquitin domain-containing protein		cytoplasm [GO:0005737]; nucleus [GO:0005634]
J9VN92	WT:uggt	TRUE	0.1	0.0517492	5.39057	4.54751	-0.843058	0	0.557461	CNAG_06632		Atypical/ABC1 protein kinase			ATP binding [GO:0005524]; protein kinase activity [GO:0004672]
J9VY90	WT:uggt	TRUE	0.2	0.140438	0.597853	0.397711	-0.200142	0	0.870465	CNAG_03465	LAC1	Laccase-1 (EC 1.10.3.2) (Diphenol oxidase 1)		extracellular region [GO:0005576]	copper ion binding [GO:0005507]; hydroquinone:oxygen oxidoreductase activity [GO:0052716]
J9W2R1	WT:uggt	TRUE	0.1	0.0048562	-0.737654	0.143304	0.880959	0	1.8416	CNAG_06178		Uncharacterized protein
J9VTJ6	WT:uggt	TRUE	0.1	0.0206098	-2.27212	-1.8765	0.39562	0	1.31551	CNAG_01106		V-type proton ATPase subunit a	vacuolar acidification [GO:0007035]	fungal-type vacuole membrane [GO:0000329]; plasma membrane [GO:0005886]; vacuolar proton-transporting V-type ATPase, V0 domain [GO:0000220]	ATPase binding [GO:0051117]; proton-transporting ATPase activity, rotational mechanism [GO:0046961]
J9VMB8	WT:uggt	TRUE	0.1	0.00842158	-0.063031	0.629714	0.692745	0	1.61636	CNAG_00705		RuvB-like helicase (EC 3.6.4.12)	box C/D snoRNP assembly [GO:0000492]; chromatin remodeling [GO:0006338]; DNA repair [GO:0006281]; regulation of transcription by RNA polymerase II [GO:0006357]	Ino80 complex [GO:0031011]; NuA4 histone acetyltransferase complex [GO:0035267]; R2TP complex [GO:0097255]; Swr1 complex [GO:0000812]	ATP binding [GO:0005524]; ATP hydrolysis activity [GO:0016887]; DNA helicase activity [GO:0003678]
J9VT86	WT:uggt	TRUE	0.1	0.0164158	-0.03881	0.601367	0.640177	0	1.55852	CNAG_01236		rRNA-processing protein EBP2	ribosomal large subunit biogenesis [GO:0042273]; rRNA processing [GO:0006364]	nuclear periphery [GO:0034399]; nucleolus [GO:0005730]; preribosome, large subunit precursor [GO:0030687]
J9VM46	WT:uggt	TRUE	0.1	0.0278696	0.1907	-0.715795	-0.906495	0	0.53348	CNAG_02280		PRKR-interacting protein 1		nucleolus [GO:0005730]	double-stranded RNA binding [GO:0003725]; protein kinase binding [GO:0019901]; protein kinase inhibitor activity [GO:0004860]
J9VTZ8	WT:uggt	TRUE	1	0.798943	2.08064	2.02552	-0.0551221	0	0.962513	CNAG_00919		Carboxypeptidase (EC 3.4.16.-)	proteolysis [GO:0006508]		serine-type carboxypeptidase activity [GO:0004185]
J9VZV2	WT:uggt	TRUE	0.1	0.0231819	-0.941543	-1.33701	-0.395464	0	0.760245	CNAG_07838		Cytoplasmic protein	N-acetylglucosamine metabolic process [GO:0006044]	cytoplasm [GO:0005737]
J9VWZ0	WT:uggt	TRUE	0.1	0.0587827	-0.175425	-0.803349	-0.627923	0	0.647107	CNAG_05541		Kinase regulator	cell division [GO:0051301]; hippo signaling [GO:0035329]; positive regulation of protein phosphorylation [GO:0001934]	cytoplasm [GO:0005737]; nucleus [GO:0005634]	kinase activity [GO:0016301]; protein kinase activator activity [GO:0030295]
J9W086	WT:uggt	TRUE	0.1	0.0315745	-0.328824	0.34238	0.671204	0	1.5924	CNAG_06147		Uncharacterized protein
J9VGY2	WT:uggt	TRUE	0.1	0.000946169	0.744343	0.133561	-0.610781	0	0.654842	CNAG_03025		V-type H-transporting ATPase subunit D	vacuolar acidification [GO:0007035]	fungal-type vacuole membrane [GO:0000329]; vacuolar proton-transporting V-type ATPase complex [GO:0016471]	proton-transporting ATPase activity, rotational mechanism [GO:0046961]
J9VLB4	WT:uggt	TRUE	0.7	0.818972	2.41996	2.46877	0.0488064	0	1.03441	CNAG_04976		Zuotin	'de novo' cotranslational protein folding [GO:0051083]; regulation of translational fidelity [GO:0006450]	cytosol [GO:0005829]	Hsp70 protein binding [GO:0030544]; ribosome binding [GO:0043022]
J9W1R3	WT:uggt	TRUE	1	0.943806	-2.98198	-3.0241	-0.042118	0	0.971228	CNAG_05499		SHO1 osmosensor		plasma membrane [GO:0005886]
J9VZ98	WT:uggt	TRUE	1	0.778499	0.29924	0.356917	0.0576765	0	1.04079	CNAG_05355		E3 ubiquitin-protein ligase (EC 2.3.2.26)	proteasome-mediated ubiquitin-dependent protein catabolic process [GO:0043161]; protein polyubiquitination [GO:0000209]	cytoplasm [GO:0005737]	ubiquitin protein ligase activity [GO:0061630]
J9VLB3	WT:uggt	TRUE	0.1	0.0102423	0.782608	1.22241	0.439804	0	1.35642	CNAG_00326		J domain-containing protein	protein import into peroxisome matrix [GO:0016558]	cytosol [GO:0005829]
J9VQ85	WT:uggt	TRUE	0.1	0.0138521	0.723681	0.280153	-0.443528	0	0.735334	CNAG_03413		Alginate lyase			lyase activity [GO:0016829]
J9VXU0	WT:uggt	TRUE	0.2	0.0918302	0.146943	-0.338451	-0.485394	0	0.714302	CNAG_03299		Coatomer subunit beta (Beta-coat protein)	endoplasmic reticulum to Golgi vesicle-mediated transport [GO:0006888]; intra-Golgi vesicle-mediated transport [GO:0006891]; intracellular protein transport [GO:0006886]	COPI vesicle coat [GO:0030126]; Golgi membrane [GO:0000139]	structural molecule activity [GO:0005198]
J9VH88	WT:uggt	TRUE	0.2	0.098398	-0.0521536	-0.569569	-0.517416	0	0.698622	CNAG_02920		Hydrolase	asparagine metabolic process [GO:0006528]; glutamine metabolic process [GO:0006541]; oxaloacetate metabolic process [GO:0006107]	mitochondrion [GO:0005739]	omega-amidase activity [GO:0050152]
J9VVU4	WT:uggt	TRUE	0.1	0.0169117	-0.436521	-0.916073	-0.479553	0	0.7172	CNAG_06344		IMS import disulfide relay-system CHCH-CHCH-like Cx9C domain-containing protein	cellular respiration [GO:0045333]	mitochondrial intermembrane space [GO:0005758]
J9VNN1	WT:uggt	TRUE	0.1	0.000295972	1.62236	2.20118	0.578824	0	1.49363	CNAG_01120		Acetyltransferase component of pyruvate dehydrogenase complex (EC 2.3.1.12)	acetyl-CoA biosynthetic process from pyruvate [GO:0006086]	mitochondrion [GO:0005739]; pyruvate dehydrogenase complex [GO:0045254]	dihydrolipoyllysine-residue acetyltransferase activity [GO:0004742]
J9VWK2	WT:uggt	TRUE	0.1	0.0264068	1.13844	1.54315	0.404712	0	1.32383	CNAG_04237		ABM domain-containing protein
J9VRU4	WT:uggt	TRUE	0.1	0.107233	0.422363	0.821195	0.398832	0	1.31844	CNAG_05135		Ca2-transporting ATPase	intracellular calcium ion homeostasis [GO:0006874]; manganese ion transport [GO:0006828]	endoplasmic reticulum [GO:0005783]; Golgi membrane [GO:0000139]; plasma membrane [GO:0005886]	ATP binding [GO:0005524]; ATP hydrolysis activity [GO:0016887]; P-type calcium transporter activity [GO:0005388]
J9VGI4	WT:uggt	TRUE	0.1	0.0312492	-1.44648	-1.03056	0.415915	0	1.33414	CNAG_03753		Dolichol-phosphate mannosyltransferase subunit 1 (EC 2.4.1.83)	dolichol-linked oligosaccharide biosynthetic process [GO:0006488]; GPI anchor biosynthetic process [GO:0006506]; protein O-linked mannosylation [GO:0035269]	endoplasmic reticulum membrane [GO:0005789]	dolichyl-phosphate beta-D-mannosyltransferase activity [GO:0004582]
J9VEL1	WT:uggt	TRUE	0.1	0.00342992	0.811072	0.378815	-0.432257	0	0.741101	CNAG_00648		Esterase/lipase	acylglycerol metabolic process [GO:0006639]	membrane [GO:0016020]	acylglycerol lipase activity [GO:0047372]
J9VN10	WT:uggt	TRUE	1	0.540613	0.250551	0.220497	-0.030054	0	0.979384	CNAG_02725		proteasome endopeptidase complex (EC 3.4.25.1)	proteolysis involved in protein catabolic process [GO:0051603]	proteasome core complex [GO:0005839]
J9VLG3	WT:uggt	TRUE	0.1	0.141104	0.0366238	-0.0804312	-0.117055	0	0.922068	CNAG_03904		26S protease regulatory subunit 6B	proteasome-mediated ubiquitin-dependent protein catabolic process [GO:0043161]	proteasome regulatory particle, base subcomplex [GO:0008540]	ATP binding [GO:0005524]; ATP hydrolysis activity [GO:0016887]; peptidase activity [GO:0008233]; proteasome-activating activity [GO:0036402]
J9VSW4	WT:uggt	TRUE	1	0.907688	-0.109521	-0.120307	-0.0107861	0	0.992552	CNAG_02110		Peptide alpha-N-acetyltransferase		NatA complex [GO:0031415]	transferase activity [GO:0016740]
J9VJZ1	WT:uggt	TRUE	0.1	0.0186629	0.901125	0.0590153	-0.84211	0	0.557827	CNAG_05292		Alpha,alpha-trehalose-phosphate synthase (UDP-forming)	cellular response to heat [GO:0034605]; trehalose biosynthetic process [GO:0005992]; trehalose metabolism in response to stress [GO:0070413]	alpha,alpha-trehalose-phosphate synthase complex (UDP-forming) [GO:0005946]; cytosol [GO:0005829]	hexosyltransferase activity [GO:0016758]; trehalose-phosphatase activity [GO:0004805]
J9VRN7	WT:uggt	TRUE	1	0.856476	1.52437	1.55265	0.0282835	0	1.0198	CNAG_04163		Proteophosphoglycan ppg4
J9VN22	WT:uggt	TRUE	1	0.732028	0.45439	0.575024	0.120634	0	1.08721	CNAG_02710		T-complex protein 1 subunit gamma		chaperonin-containing T-complex [GO:0005832]	ATP binding [GO:0005524]; ATP hydrolysis activity [GO:0016887]; ATP-dependent protein folding chaperone [GO:0140662]; unfolded protein binding [GO:0051082]
T2BP87	WT:uggt	TRUE	0.1	0.0117305	2.22428	1.89855	-0.325725	0	0.797897	CNAG_05882		Class E vacuolar protein-sorting machinery protein HSE1 (Class E vacuolar protein-sorting machinery protein hse1)	protein transport to vacuole involved in ubiquitin-dependent protein catabolic process via the multivesicular body sorting pathway [GO:0043328]	endosome membrane [GO:0010008]; ESCRT-0 complex [GO:0033565]	phosphatidylinositol binding [GO:0035091]; ubiquitin binding [GO:0043130]
J9VFR5	WT:uggt	TRUE	0.1	8.60636e-05	2.25343	1.35267	-0.900755	0	0.535606	CNAG_00058		T-complex protein 1 subunit epsilon (CCT-epsilon)		chaperonin-containing T-complex [GO:0005832]	ATP binding [GO:0005524]; ATP hydrolysis activity [GO:0016887]; ATP-dependent protein folding chaperone [GO:0140662]; unfolded protein binding [GO:0051082]
T2BP03	WT:uggt	TRUE	0.1	0.0594677	1.54548	1.05321	-0.492269	0	0.710906	CNAG_05650		ubiquitinyl hydrolase 1 (EC 3.4.19.12)	proteolysis [GO:0006508]; regulation of protein stability [GO:0031647]	cytosol [GO:0005829]; nucleus [GO:0005634]	cysteine-type deubiquitinase activity [GO:0004843]
J9VHN5	WT:uggt	TRUE	0.1	0.0633875	-0.561805	-0.896539	-0.334734	0	0.792931	CNAG_02780	BNA5	Kynureninase (EC 3.7.1.3) (Biosynthesis of nicotinic acid protein 5) (L-kynurenine hydrolase)	'de novo' NAD biosynthetic process from tryptophan [GO:0034354]; anthranilate metabolic process [GO:0043420]; L-kynurenine catabolic process [GO:0097053]; quinolinate biosynthetic process [GO:0019805]; tryptophan catabolic process to kynurenine [GO:0019441]	cytoplasm [GO:0005737]	3-hydroxykynureninase activity [GO:0061981]; kynureninase activity [GO:0030429]; pyridoxal phosphate binding [GO:0030170]
J9VVX0	WT:uggt	TRUE	0.1	0.0197148	-0.419002	0.173189	0.592191	0	1.50753	CNAG_03544		Uncharacterized protein		mitochondrial respiratory chain complex I [GO:0005747]
J9VV99	WT:uggt	TRUE	1	0.86285	1.93628	1.89361	-0.0426636	0	0.970861	CNAG_03298		ATP synthase subunit e, mitochondrial	proton motive force-driven ATP synthesis [GO:0015986]	mitochondrial proton-transporting ATP synthase complex, coupling factor F(o) [GO:0000276]	proton transmembrane transporter activity [GO:0015078]
J9VQ62	WT:uggt	TRUE	0.1	0.0116112	-1.50114	-1.20623	0.294911	0	1.22681	CNAG_02281		Uncharacterized protein
J9VLV3	WT:uggt	TRUE	0.1	0.00144349	4.45188	4.23004	-0.221833	0	0.857476	CNAG_05131		HMG box domain-containing protein	regulation of transcription by RNA polymerase II [GO:0006357]	nucleus [GO:0005634]	DNA binding, bending [GO:0008301]
J9VRD2	WT:uggt	TRUE	0.1	0.0374171	-1.22174	-2.00738	-0.78564	0	0.580095	CNAG_00968		Fe2OG dioxygenase domain-containing protein		nucleus [GO:0005634]	dioxygenase activity [GO:0051213]; metal ion binding [GO:0046872]
J9VTV9	WT:uggt	TRUE	0.1	0.00207572	-0.548333	0.0716495	0.619983	0	1.53686	CNAG_04119		Rho guanyl-nucleotide exchange factor	intracellular signal transduction [GO:0035556]		guanyl-nucleotide exchange factor activity [GO:0005085]
J9VND2	WT:uggt	TRUE	0.1	0.0458521	-0.313229	0.562748	0.875977	0	1.83525	CNAG_01230	CDA2/MP98	Chitin deacetylase 2 (EC 3.5.1.41)	cell wall chitin catabolic process [GO:0006039]; cell wall organization [GO:0071555]; fungal-type cell wall biogenesis [GO:0009272]; polysaccharide catabolic process [GO:0000272]	extracellular region [GO:0005576]; fungal-type cell wall [GO:0009277]; plasma membrane [GO:0005886]; side of membrane [GO:0098552]	chitin binding [GO:0008061]; chitin deacetylase activity [GO:0004099]; metal ion binding [GO:0046872]
J9VSC8	WT:uggt	TRUE	0.1	0.0876092	3.71457	3.16263	-0.551935	0	0.682105	CNAG_04448		Ribosomal protein L19	translation [GO:0006412]	cytosolic large ribosomal subunit [GO:0022625]	RNA binding [GO:0003723]; structural constituent of ribosome [GO:0003735]
J9VW63	WT:uggt	TRUE	0.1	0.000378719	1.25744	0.276965	-0.98048	0	0.506811	CNAG_06630		Mitochondrial import inner membrane translocase subunit TIM44	protein import into mitochondrial matrix [GO:0030150]	mitochondrial inner membrane [GO:0005743]	protein-folding chaperone binding [GO:0051087]
J9VIQ1	WT:uggt	TRUE	0.7	0.752363	0.205604	0.109561	-0.0960423	0	0.935596	CNAG_00315		HHE domain-containing protein	inorganic ion homeostasis [GO:0098771]
J9VN63	WT:uggt	TRUE	0.1	0.00647846	-1.93096	-1.18617	0.744791	0	1.67573	CNAG_07530		TPR-like protein	phosphatidylinositol phosphate biosynthetic process [GO:0046854]; protein localization to plasma membrane [GO:0072659]	plasma membrane [GO:0005886]
J9VX99	WT:uggt	TRUE	0.1	0.000203841	3.80258	2.80963	-0.99295	0	0.502449	CNAG_01820		Pyruvate kinase (EC 2.7.1.40)		cytoplasm [GO:0005737]	ATP binding [GO:0005524]; kinase activity [GO:0016301]; magnesium ion binding [GO:0000287]; potassium ion binding [GO:0030955]; pyruvate kinase activity [GO:0004743]
J9VGH4	WT:uggt	TRUE	0.1	0.000857932	1.92483	1.42774	-0.497095	0	0.708532	CNAG_00287		Cytoplasmic protein	post-translational protein targeting to endoplasmic reticulum membrane [GO:0006620]	membrane [GO:0016020]; TRC complex [GO:0072380]	molecular adaptor activity [GO:0060090]
J9VVD7	WT:uggt	TRUE	0.2	0.195788	0.503389	0.675925	0.172536	0	1.12704	CNAG_02139		Oxysterol-binding protein	endocytosis [GO:0006897]; exocytosis [GO:0006887]; maintenance of cell polarity [GO:0030011]; piecemeal microautophagy of the nucleus [GO:0034727]	cortical endoplasmic reticulum [GO:0032541]; cytosol [GO:0005829]; membrane [GO:0016020]	lipid binding [GO:0008289]
J9VVJ3	WT:uggt	TRUE	1	0.506219	-4.82841	-5.1075	-0.279087	0	0.824112	CNAG_06059		Cytoplasmic protein		cytosol [GO:0005829]; nucleus [GO:0005634]
J9VVX7	WT:uggt	TRUE	0.7	0.487413	-1.90315	-1.67032	0.232831	0	1.17514	CNAG_06573		Uncharacterized protein
J9VLJ9	WT:uggt	TRUE	0.1	0.00712845	5.00122	5.91641	0.915189	0	1.88582	CNAG_01019	SOD1	Superoxide dismutase [Cu-Zn] (EC 1.15.1.1) (CnSOD1)	removal of superoxide radicals [GO:0019430]; symbiont defense to host-produced reactive oxygen species [GO:0052164]	cytoplasm [GO:0005737]; cytosol [GO:0005829]; mitochondrion [GO:0005739]; nucleus [GO:0005634]; peroxisome [GO:0005777]; plasma membrane raft [GO:0044853]	copper ion binding [GO:0005507]; superoxide dismutase activity [GO:0004784]
J9VV67	WT:uggt	TRUE	0.1	0.0619038	2.73956	2.20993	-0.529631	0	0.692732	CNAG_01958		Het-c2 protein	ER to Golgi ceramide transport [GO:0035621]	cytosol [GO:0005829]; membrane [GO:0016020]	ceramide 1-phosphate binding [GO:1902387]; ceramide 1-phosphate transfer activity [GO:1902388]
J9VDR8	WT:uggt	TRUE	0.4	0.233148	-4.79336	-3.79974	0.993619	0	1.99117	CNAG_00279		Uncharacterized protein		endoplasmic reticulum membrane [GO:0005789]
J9VTI8	WT:uggt	TRUE	0.1	0.00300852	3.43229	4.31935	0.887067	0	1.84941	CNAG_04642		Tetraspanin Tsp2		membrane [GO:0016020]
J9VQ75	WT:uggt	TRUE	0.1	0.0135452	0.846491	0.308919	-0.537572	0	0.688929	CNAG_01375		Actin binding protein	neuron projection morphogenesis [GO:0048812]; positive regulation of axon extension [GO:0045773]; positive regulation of dendritic spine morphogenesis [GO:0061003]; postsynaptic actin cytoskeleton organization [GO:0098974]; regulation of actin filament polymerization [GO:0030833]	actin filament [GO:0005884]; cortical actin cytoskeleton [GO:0030864]; site of polarized growth [GO:0030427]	actin filament binding [GO:0051015]
T2BPK3	WT:uggt	TRUE	0.1	0.0242288	-1.32906	-0.741973	0.587088	0	1.50221	CNAG_04339		Exocyst complex component EXO84	exocytosis [GO:0006887]; Golgi to plasma membrane transport [GO:0006893]; protein transport [GO:0015031]	exocyst [GO:0000145]; transport vesicle [GO:0030133]
T2BMD1	WT:uggt	TRUE	0.2	0.307782	-1.73451	-2.04576	-0.311253	0	0.805942	CNAG_01130		C3H1-type domain-containing protein			metal ion binding [GO:0046872]
J9VGC5	WT:uggt	TRUE	0.1	0.00512481	0.799376	0.453427	-0.345949	0	0.78679	CNAG_03693		Large ribosomal subunit protein uL11m	translation [GO:0006412]	mitochondrial large ribosomal subunit [GO:0005762]	large ribosomal subunit rRNA binding [GO:0070180]; structural constituent of ribosome [GO:0003735]
J9VRP1	WT:uggt	TRUE	0.7	0.223208	5.21434	4.92109	-0.293243	0	0.816066	CNAG_04168		Histone H1	chromosome condensation [GO:0030261]; negative regulation of DNA recombination [GO:0045910]; nucleosome assembly [GO:0006334]	nucleosome [GO:0000786]; nucleus [GO:0005634]	double-stranded DNA binding [GO:0003690]; nucleosomal DNA binding [GO:0031492]; structural constituent of chromatin [GO:0030527]
J9VLY9	WT:uggt	TRUE	0.2	0.0845861	-3.56786	-2.875	0.692854	0	1.61648	CNAG_05171		poly(A)-specific ribonuclease (EC 3.1.13.4)	mRNA catabolic process [GO:0006402]	CCR4-NOT core complex [GO:0030015]; P-body [GO:0000932]	nucleic acid binding [GO:0003676]; poly(A)-specific ribonuclease activity [GO:0004535]
J9VWF4	WT:uggt	TRUE	0.1	0.0448383	-0.823846	-1.02858	-0.204734	0	0.867699	CNAG_04182		Uncharacterized protein		mitochondrial large ribosomal subunit [GO:0005762]	structural constituent of ribosome [GO:0003735]
J9W2D7	WT:uggt	TRUE	1	0.948818	1.85151	1.85761	0.00609368	0	1.00423	CNAG_06061	INT6	Eukaryotic translation initiation factor 3 subunit E (eIF3e)	formation of cytoplasmic translation initiation complex [GO:0001732]	eukaryotic 43S preinitiation complex [GO:0016282]; eukaryotic 48S preinitiation complex [GO:0033290]; eukaryotic translation initiation factor 3 complex, eIF3e [GO:0071540]; nucleus [GO:0005634]	translation initiation factor activity [GO:0003743]
J9VFW4	WT:uggt	TRUE	0.7	0.678916	0.984483	0.520697	-0.463786	0	0.725081	CNAG_00104		Elongation factor 3	chromatin remodeling [GO:0006338]	cytoplasm [GO:0005737]	ATP binding [GO:0005524]; ATP hydrolysis activity [GO:0016887]; RNA binding [GO:0003723]; translation elongation factor activity [GO:0003746]
J9VSH3	WT:uggt	TRUE	0.1	0.0187708	3.3186	2.79282	-0.52578	0	0.694584	CNAG_04499		Clathrin light chain	clathrin-dependent endocytosis [GO:0072583]; intracellular protein transport [GO:0006886]	clathrin coat of coated pit [GO:0030132]; clathrin coat of trans-Golgi network vesicle [GO:0030130]	clathrin heavy chain binding [GO:0032050]; structural molecule activity [GO:0005198]
J9VI14	WT:uggt	TRUE	1	0.921242	-2.76171	-2.71522	0.0464895	0	1.03275	CNAG_02854		thioredoxin-dependent peroxiredoxin (EC 1.11.1.24) (Thioredoxin peroxidase)	cell redox homeostasis [GO:0045454]; cellular response to oxidative stress [GO:0034599]	cytoplasm [GO:0005737]	thioredoxin peroxidase activity [GO:0008379]
J9VTD7	WT:uggt	TRUE	0.2	0.0928191	-0.0568794	-0.558018	-0.501138	0	0.706549	CNAG_03456		RWD domain-containing protein	cytoplasmic translation [GO:0002181]
J9VXX0	WT:uggt	TRUE	0.1	0.00245111	0.468409	1.07781	0.609399	0	1.52562	CNAG_04768		Zn(2)-C6 fungal-type domain-containing protein	DNA-templated transcription [GO:0006351]; positive regulation of transcription from RNA polymerase II promoter by galactose [GO:0000435]	nucleus [GO:0005634]	DNA-binding transcription factor activity, RNA polymerase II-specific [GO:0000981]; RNA polymerase II cis-regulatory region sequence-specific DNA binding [GO:0000978]; zinc ion binding [GO:0008270]
J9VFX9	WT:uggt	TRUE	0.7	0.398436	2.26719	2.16167	-0.105518	0	0.929471	CNAG_03771		DNA binding protein Ncp1
J9VGV6	WT:uggt	TRUE	0.1	0.00715019	-1.37605	-2.36394	-0.987886	0	0.504216	CNAG_07360		Mitotic checkpoint regulator, MAD2B-interacting-domain-containing protein		nucleus [GO:0005634]
J9VHC1	WT:uggt	TRUE	0.1	0.137077	8.09217	8.72358	0.631411	0	1.54908	CNAG_04068		Large ribosomal subunit protein eL28	translation [GO:0006412]	cytosolic large ribosomal subunit [GO:0022625]	structural constituent of ribosome [GO:0003735]
J9VWQ1	WT:uggt	TRUE	0.1	0.00242171	-0.707627	-1.59683	-0.889201	0	0.539913	CNAG_01636		Peptidyl-prolyl cis-trans isomerase (PPIase) (EC 5.2.1.8)	protein folding [GO:0006457]	catalytic step 2 spliceosome [GO:0071013]	peptidyl-prolyl cis-trans isomerase activity [GO:0003755]
J9VF13	WT:uggt	TRUE	0.7	0.574502	8.22151	8.05618	-0.165333	0	0.891723	CNAG_00771		Large subunit ribosomal protein L29	maturation of LSU-rRNA from tricistronic rRNA transcript (SSU-rRNA, 5.8S rRNA, LSU-rRNA) [GO:0000463]; translation [GO:0006412]	cytosolic large ribosomal subunit [GO:0022625]	mRNA binding [GO:0003729]; structural constituent of ribosome [GO:0003735]
J9VGN9	WT:uggt	TRUE	0.1	0.0182585	1.2608	0.483935	-0.776862	0	0.583635	CNAG_03812		histidinol-phosphate transaminase (EC 2.6.1.9) (Imidazole acetol-phosphate transaminase)	histidine biosynthetic process [GO:0000105]		histidinol-phosphate transaminase activity [GO:0004400]; pyridoxal phosphate binding [GO:0030170]
J9VK09	WT:uggt	TRUE	0.1	0.0838197	1.20447	2.12932	0.924849	0	1.89849	CNAG_02916		F-type H-transporting ATPase subunit F		mitochondrial proton-transporting ATP synthase complex, coupling factor F(o) [GO:0000276]	proton-transporting ATP synthase activity, rotational mechanism [GO:0046933]
J9VIW2	WT:uggt	TRUE	0.4	0.301813	0.415697	0.192673	-0.223024	0	0.856768	CNAG_00386		Translation initiation factor 4G		eukaryotic translation initiation factor 4F complex [GO:0016281]	mRNA binding [GO:0003729]; translation initiation factor activity [GO:0003743]
J9VJ67	WT:uggt	TRUE	0.7	0.279546	-2.12469	-1.75807	0.366625	0	1.28933	CNAG_00513		Ribosome biogenesis protein NOP53	rRNA processing [GO:0006364]	nucleolus [GO:0005730]; nucleoplasm [GO:0005654]	5S rRNA binding [GO:0008097]
J9VT98	WT:uggt	TRUE	0.2	0.111259	-0.392957	0.326095	0.719052	0	1.6461	CNAG_01475		sphingolipid C(9)-methyltransferase (EC 2.1.1.317)	methylation [GO:0032259]	membrane [GO:0016020]	methyltransferase activity [GO:0008168]
J9VU00	WT:uggt	TRUE	0.7	0.765319	-0.297298	-0.217888	0.07941	0	1.05659	CNAG_01543		AP-3 complex subunit beta	anterograde synaptic vesicle transport [GO:0048490]; intracellular protein transport [GO:0006886]; vesicle-mediated transport [GO:0016192]	AP-3 adaptor complex [GO:0030123]
J9VZ68	WT:uggt	TRUE	0.1	0.00108046	1.38807	0.857891	-0.530183	0	0.692467	CNAG_04299		Uncharacterized protein
J9VVB2	WT:uggt	TRUE	0.7	0.264962	3.95041	3.58269	-0.367724	0	0.775004	CNAG_02007	ADK1	Adenylate kinase (EC 2.7.4.3) (ATP-AMP transphosphorylase) (ATP:AMP phosphotransferase) (Adenylate kinase cytosolic and mitochondrial) (Adenylate monophosphate kinase)	ADP biosynthetic process [GO:0006172]; AMP metabolic process [GO:0046033]; ATP metabolic process [GO:0046034]	cytosol [GO:0005829]; mitochondrial intermembrane space [GO:0005758]	adenylate kinase activity [GO:0004017]; ATP binding [GO:0005524]
J9W3E2	WT:uggt	TRUE	0.7	0.383068	-0.430034	-0.15456	0.275474	0	1.21039	CNAG_06473		VHS domain-containing protein	actin cortical patch localization [GO:0051666]; actin filament organization [GO:0007015]; endocytosis [GO:0006897]	actin cortical patch [GO:0030479]
J9VW58	WT:uggt	TRUE	0.2	0.0707894	-0.551983	-0.149502	0.402481	0	1.32178	CNAG_06625		UBX domain-containing protein 1	autophagosome assembly [GO:0000045]; Golgi organization [GO:0007030]; membrane fusion [GO:0061025]; nuclear membrane reassembly [GO:0031468]; proteasome-mediated ubiquitin-dependent protein catabolic process [GO:0043161]	cytosol [GO:0005829]; nucleus [GO:0005634]	ubiquitin binding [GO:0043130]
J9VST6	WT:uggt	TRUE	0.1	0.000913892	0.755859	0.195153	-0.560706	0	0.67797	CNAG_04716		KH domain-containing protein		nucleus [GO:0005634]	RNA binding [GO:0003723]
J9VNU3	WT:uggt	TRUE	0.2	0.0650467	2.22186	2.05367	-0.168192	0	0.889957	CNAG_05828		UDP-N-acetylglucosamine diphosphorylase (EC 2.7.7.23)	UDP-N-acetylglucosamine biosynthetic process [GO:0006048]		UDP-N-acetylglucosamine diphosphorylase activity [GO:0003977]
J9VNR0	WT:uggt	TRUE	0.1	0.029519	4.95904	4.45936	-0.499682	0	0.707262	CNAG_05788	VMA10	V-type proton ATPase subunit G		vacuolar proton-transporting V-type ATPase complex [GO:0016471]	proton-transporting ATPase activity, rotational mechanism [GO:0046961]
J9VVY7	WT:uggt	TRUE	0.1	0.00360139	2.48711	1.76466	-0.722449	0	0.606068	CNAG_06399		SH3 domain-containing protein	actin cortical patch localization [GO:0051666]; actin filament bundle assembly [GO:0051017]	actin cortical patch [GO:0030479]	actin filament binding [GO:0051015]; phosphatidylinositol binding [GO:0035091]
J9VHI6	WT:uggt	TRUE	0.1	0.0103143	7.15137	6.49832	-0.653043	0	0.635938	CNAG_00716		Cytochrome c	mitochondrial electron transport, cytochrome c to oxygen [GO:0006123]; mitochondrial electron transport, ubiquinol to cytochrome c [GO:0006122]	mitochondrial intermembrane space [GO:0005758]; respirasome [GO:0070469]	electron transfer activity [GO:0009055]; heme binding [GO:0020037]; metal ion binding [GO:0046872]
J9W2U9	WT:uggt	TRUE	0.7	0.636967	-2.84052	-1.8131	1.02741	0	2.03837	CNAG_06227		Fanconi-associated nuclease (EC 3.1.4.1)	interstrand cross-link repair [GO:0036297]	nucleus [GO:0005634]	5'-3' exonuclease activity [GO:0008409]; 5'-flap endonuclease activity [GO:0017108]; flap-structured DNA binding [GO:0070336]; metal ion binding [GO:0046872]; phosphodiesterase I activity [GO:0004528]
J9VU49	WT:uggt	TRUE	0.1	0.00115286	3.18869	2.21883	-0.969856	0	0.510557	CNAG_04179		Lysine--tRNA ligase (EC 6.1.1.6) (Lysyl-tRNA synthetase)	diadenosine tetraphosphate biosynthetic process [GO:0015966]; lysyl-tRNA aminoacylation [GO:0006430]; positive regulation of macrophage activation [GO:0043032]	aminoacyl-tRNA synthetase multienzyme complex [GO:0017101]; cytosol [GO:0005829]; extracellular space [GO:0005615]; mitochondrion [GO:0005739]; nucleus [GO:0005634]	ATP adenylyltransferase activity [GO:0003877]; ATP binding [GO:0005524]; lysine-tRNA ligase activity [GO:0004824]; tRNA binding [GO:0000049]
J9VZ02	WT:uggt	TRUE	0.2	0.0962818	5.65849	4.95946	-0.699027	0	0.615988	CNAG_06447		Large subunit ribosomal protein L22	cytoplasmic translation [GO:0002181]	cytosolic large ribosomal subunit [GO:0022625]	structural constituent of ribosome [GO:0003735]
J9VMR4	WT:uggt	TRUE	0.1	0.0635777	-4.7066	-5.47447	-0.767864	0	0.587286	CNAG_02047		N-acetyltransferase domain-containing protein
J9VU91	WT:uggt	TRUE	0.1	0.0397729	-0.868862	-0.16651	0.702352	0	1.62716	CNAG_04224		Carboxy-terminal domain RNA polymerase II polypeptide A small phosphatase		plasma membrane [GO:0005886]	RNA polymerase II CTD heptapeptide repeat phosphatase activity [GO:0008420]
J9VZN8	WT:uggt	TRUE	0.7	0.202599	2.11271	1.87868	-0.234028	0	0.850258	CNAG_01949		L-arabinitol 4-dehydrogenase (EC 1.1.1.12)	arabinose catabolic process [GO:0019568]; sorbitol catabolic process [GO:0006062]		L-iditol 2-dehydrogenase activity [GO:0003939]; zinc ion binding [GO:0008270]
J9VMB3	WT:uggt	TRUE	0.1	0.00233098	-0.292743	0.489946	0.782689	0	1.72033	CNAG_00701		CAP64 gene product-related
J9VW35	WT:uggt	TRUE	0.2	0.113251	0.183331	0.744526	0.561195	0	1.47549	CNAG_06600		Vesicular-fusion protein SEC18 (EC 3.6.4.6)	Golgi to plasma membrane protein transport [GO:0043001]; intra-Golgi vesicle-mediated transport [GO:0006891]; SNARE complex disassembly [GO:0035494]	Golgi stack [GO:0005795]	ATP binding [GO:0005524]; ATP hydrolysis activity [GO:0016887]
J9VX80	WT:uggt	TRUE	1	0.689078	-2.65789	-2.53196	0.125936	0	1.09122	CNAG_04510		Vacuolar protein-sorting-associated protein 4	endosomal transport [GO:0016197]; vacuole organization [GO:0007033]	endosome membrane [GO:0010008]	ATP binding [GO:0005524]; ATP hydrolysis activity [GO:0016887]
J9W0Q8	WT:uggt	TRUE	0.4	0.254108	-2.62094	-3.32204	-0.701104	0	0.615101	CNAG_06302		SnoaL-like domain-containing protein
J9VKH0	WT:uggt	TRUE	0.1	0.064544	0.594241	-0.565895	-1.16014	0	0.44747	CNAG_00057		fructose-bisphosphatase (EC 3.1.3.11) (D-fructose-1,6-bisphosphate 1-phosphohydrolase)	fructose 1,6-bisphosphate metabolic process [GO:0030388]; fructose 6-phosphate metabolic process [GO:0006002]; fructose metabolic process [GO:0006000]; gluconeogenesis [GO:0006094]; sucrose biosynthetic process [GO:0005986]	cytosol [GO:0005829]	fructose 1,6-bisphosphate 1-phosphatase activity [GO:0042132]; metal ion binding [GO:0046872]
J9VZ56	WT:uggt	TRUE	0.1	0.00528947	1.55492	0.653376	-0.901541	0	0.535315	CNAG_06511		Uncharacterized protein			oxidoreductase activity [GO:0016491]
J9VZB1	WT:uggt	TRUE	0.1	0.0457382	-1.30221	-1.88317	-0.580955	0	0.668521	CNAG_01777		Glyoxylate reductase		cytosol [GO:0005829]	glycerate dehydrogenase activity [GO:0008465]; glyoxylate reductase (NADPH) activity [GO:0030267]; hydroxypyruvate reductase activity [GO:0016618]; NAD binding [GO:0051287]
J9VJS4	WT:uggt	TRUE	0.2	0.176164	-1.23012	-1.53288	-0.302762	0	0.810699	CNAG_03011		Glycerate-and formate-dehydrogenase			NAD binding [GO:0051287]; oxidoreductase activity, acting on the CH-OH group of donors, NAD or NADP as acceptor [GO:0016616]
J9VXT4	WT:uggt	TRUE	0.1	0.0024891	0.712835	-0.247074	-0.959909	0	0.514089	CNAG_07846		Ran-binding protein 3	NLS-bearing protein import into nucleus [GO:0006607]; positive regulation of mitotic centrosome separation [GO:0046604]	cytoplasm [GO:0005737]; nuclear pore [GO:0005643]	GTPase activator activity [GO:0005096]
J9W1J0	WT:uggt	TRUE	0.1	0.0796368	-0.61166	0.123728	0.735388	0	1.66485	CNAG_05446		Kexin	peptide hormone processing [GO:0016486]	extracellular space [GO:0005615]; membrane [GO:0016020]; trans-Golgi network [GO:0005802]	serine-type endopeptidase activity [GO:0004252]
J9VTB3	WT:uggt	TRUE	0.1	0.00544307	-0.841915	-0.433683	0.408232	0	1.32706	CNAG_07660		Pyruvate dehydrogenase E1 component subunit alpha (EC 1.2.4.1)	acetyl-CoA biosynthetic process from pyruvate [GO:0006086]	intracellular membrane-bounded organelle [GO:0043231]	pyruvate dehydrogenase (acetyl-transferring) activity [GO:0004739]
J9VND4	WT:uggt	TRUE	0.1	8.16749e-05	2.57517	3.32788	0.752704	0	1.68495	CNAG_02046	PBP1	PAB1-binding protein 1 (Poly(A)-binding protein-binding protein)	regulation of translation [GO:0006417]; stress granule assembly [GO:0034063]	cytoplasmic stress granule [GO:0010494]; P-body [GO:0000932]	mRNA binding [GO:0003729]
J9VP84	WT:uggt	TRUE	0.1	0.0243372	0.730665	0.281361	-0.449304	0	0.732396	CNAG_05745		Cytoplasmic protein		cytosol [GO:0005829]
J9VRB4	WT:uggt	TRUE	0.1	0.000233887	1.20416	0.221067	-0.983089	0	0.505895	CNAG_07801		Aldo-keto reductase	small molecule metabolic process [GO:0044281]		oxidoreductase activity [GO:0016491]
J9VTN7	WT:uggt	TRUE	0.7	0.196333	2.99982	2.48153	-0.518289	0	0.698199	CNAG_06669		Thiamine-binding protein domain-containing protein		cytosol [GO:0005829]
J9VPH1	WT:uggt	TRUE	0.7	0.932669	-0.759453	-0.741892	0.0175614	0	1.01225	CNAG_04090		Activating transcription factor			DNA-binding transcription factor activity, RNA polymerase II-specific [GO:0000981]; RNA polymerase II cis-regulatory region sequence-specific DNA binding [GO:0000978]
J9VHD5	WT:uggt	TRUE	0.1	0.000527684	0.588833	-0.262552	-0.851385	0	0.554252	CNAG_00662		Carboxymethylenebutenolidase			hydrolase activity [GO:0016787]
J9VZL1	WT:uggt	TRUE	0.1	0.000267844	0.560965	0.146197	-0.414768	0	0.75014	CNAG_04475		Phosphoglycerate mutase		cytoplasm [GO:0005737]	phosphatase activity [GO:0016791]
J9VV31	WT:uggt	TRUE	0.7	0.726541	0.5801	0.629536	0.0494357	0	1.03486	CNAG_07718		Actin cytoskeleton-regulatory complex protein PAN1 (Actin cytoskeleton-regulatory complex protein pan1)	intracellular signal transduction [GO:0035556]; positive regulation of Rho protein signal transduction [GO:0035025]	cytoplasm [GO:0005737]; membrane [GO:0016020]	actin binding [GO:0003779]; calcium ion binding [GO:0005509]; guanyl-nucleotide exchange factor activity [GO:0005085]
J9VZ27	WT:uggt	TRUE	0.1	0.0273304	-2.61309	-3.33682	-0.72373	0	0.60553	CNAG_04248		ubiquitinyl hydrolase 1 (EC 3.4.19.12)	proteolysis [GO:0006508]	nucleus [GO:0005634]	cysteine-type deubiquitinase activity [GO:0004843]; ubiquitin binding [GO:0043130]
J9VXD7	WT:uggt	TRUE	0.1	0.00061355	0.962976	0.0776622	-0.885314	0	0.54137	CNAG_05463		Uncharacterized protein
J9W0P4	WT:uggt	TRUE	0.4	0.17043	-4.63961	-3.91286	0.726759	0	1.65492	CNAG_06289		VWFA domain-containing protein		cytoplasm [GO:0005737]	protein serine/threonine kinase activity [GO:0004674]
J9VST1	WT:uggt	TRUE	0.1	0.07965	0.126456	0.433456	0.306999	0	1.23713	CNAG_02140		NADH dehydrogenase [ubiquinone] 1 alpha subcomplex subunit	mitochondrial respiratory chain complex I assembly [GO:0032981]; response to oxidative stress [GO:0006979]	mitochondrial respiratory chain complex I [GO:0005747]
J9VLB6	WT:uggt	TRUE	0.7	0.697851	-2.13823	-2.26011	-0.12189	0	0.918983	CNAG_01108		Allantoicase	allantoin catabolic process [GO:0000256]; purine nucleobase metabolic process [GO:0006144]		allantoicase activity [GO:0004037]; ureidoglycolate hydrolase activity [GO:0004848]; ureidoglycolate lyase activity [GO:0050385]
J9VHZ8	WT:uggt	TRUE	0.1	0.0695535	-0.830438	-1.31633	-0.485896	0	0.714053	CNAG_07547		Phosphoglycerate mutase	negative regulation of glycolytic process [GO:0045820]; regulation of pentose-phosphate shunt [GO:0043456]	cytosol [GO:0005829]; nucleus [GO:0005634]	fructose-2,6-bisphosphate 2-phosphatase activity [GO:0004331]
J9VHR5	WT:uggt	TRUE	0.2	0.229844	-0.401838	-1.13196	-0.730122	0	0.602853	CNAG_00021		S-adenosylmethionine decarboxylase proenzyme	spermidine biosynthetic process [GO:0008295]; spermine biosynthetic process [GO:0006597]	cytosol [GO:0005829]	adenosylmethionine decarboxylase activity [GO:0004014]; putrescine binding [GO:0019810]
J9VP81	WT:uggt	TRUE	0.1	0.00101995	0.133867	0.775519	0.641652	0	1.56011	CNAG_05976		Nucleolar protein 58		box C/D methylation guide snoRNP complex [GO:0031428]; nucleolus [GO:0005730]; small-subunit processome [GO:0032040]	snoRNA binding [GO:0030515]
J9VKZ2	WT:uggt	TRUE	0.7	0.463081	1.40429	1.62303	0.218739	0	1.16372	CNAG_07334		Ferric-chelate reductase	copper ion import [GO:0015677]; intracellular iron ion homeostasis [GO:0006879]; iron ion transport [GO:0006826]	plasma membrane [GO:0005886]	ferric-chelate reductase activity [GO:0000293]
J9VQI3	WT:uggt	TRUE	0.1	0.0805753	1.86654	1.2534	-0.613146	0	0.65377	CNAG_02752		Short-chain dehydrogenase			oxidoreductase activity [GO:0016491]
J9VGD8	WT:uggt	TRUE	0.7	0.776751	-1.14162	-1.12146	0.0201607	0	1.01407	CNAG_03708		Signal recognition particle subunit SRP72	SRP-dependent cotranslational protein targeting to membrane [GO:0006614]	endoplasmic reticulum [GO:0005783]; signal recognition particle, endoplasmic reticulum targeting [GO:0005786]	7S RNA binding [GO:0008312]; ribosome binding [GO:0043022]
J9VZD5	WT:uggt	TRUE	0.4	0.300728	-0.807334	-0.646248	0.161086	0	1.11813	CNAG_01813		mannose-1-phosphate guanylyltransferase (EC 2.7.7.13)	cellular nitrogen compound biosynthetic process [GO:0044271]; GDP-mannose biosynthetic process [GO:0009298]; protein glycosylation [GO:0006486]	cytoplasm [GO:0005737]	GTP binding [GO:0005525]; mannose-1-phosphate guanylyltransferase (GTP) activity [GO:0004475]
J9VTQ3	WT:uggt	TRUE	0.1	0.00590088	0.683323	0.221278	-0.462045	0	0.725956	CNAG_01047		CND01770-like protein
J9VQV5	WT:uggt	TRUE	0.1	0.114337	1.01968	1.61729	0.597618	0	1.51322	CNAG_02029		Wiskott-Aldrich syndrome protein		nucleus [GO:0005634]	actin binding [GO:0003779]
J9VJX9	WT:uggt	TRUE	0.1	0.0129957	0.0182274	-0.255913	-0.274141	0	0.826943	CNAG_07511		Nucleolar protein 15	maturation of LSU-rRNA from tricistronic rRNA transcript (SSU-rRNA, 5.8S rRNA, LSU-rRNA) [GO:0000463]	nucleolus [GO:0005730]	RNA binding [GO:0003723]
J9VY09	WT:uggt	TRUE	0.7	0.709622	0.775126	0.81388	0.0387539	0	1.02723	CNAG_03375		Succinate--CoA ligase [ADP-forming] subunit alpha, mitochondrial (EC 6.2.1.5) (Succinyl-CoA synthetase subunit alpha) (SCS-alpha)	tricarboxylic acid cycle [GO:0006099]	cytosol [GO:0005829]; mitochondrion [GO:0005739]; succinate-CoA ligase complex (ADP-forming) [GO:0009361]	nucleotide binding [GO:0000166]; succinate-CoA ligase (ADP-forming) activity [GO:0004775]; succinate-CoA ligase (GDP-forming) activity [GO:0004776]
J9VJ63	WT:uggt	TRUE	0.1	0.0669899	-1.94156	-1.54403	0.39753	0	1.31725	CNAG_00508		Vacuolar protein sorting-associated protein vps17	intracellular protein transport [GO:0006886]; retrograde transport, endosome to Golgi [GO:0042147]	cytosol [GO:0005829]; endosome [GO:0005768]; retromer, tubulation complex [GO:0030905]	phosphatidylinositol-3-phosphate binding [GO:0032266]
J9VVN8	WT:uggt	TRUE	0.4	0.292619	1.57917	1.35327	-0.225899	0	0.855062	CNAG_06287		Glutathione peroxidase	cellular response to oxidative stress [GO:0034599]	cytosol [GO:0005829]; mitochondrion [GO:0005739]; nucleus [GO:0005634]	glutathione peroxidase activity [GO:0004602]; phospholipid-hydroperoxide glutathione peroxidase activity [GO:0047066]; thioredoxin-dependent peroxiredoxin activity [GO:0140824]
J9VU38	WT:uggt	TRUE	0.1	0.00631461	1.98854	1.16112	-0.827424	0	0.563535	CNAG_01745		Glycerol-3-phosphate dehydrogenase [NAD(+)] (EC 1.1.1.8)	carbohydrate metabolic process [GO:0005975]; glycerol-3-phosphate catabolic process [GO:0046168]; NADH oxidation [GO:0006116]	cytosol [GO:0005829]; glycerol-3-phosphate dehydrogenase (FAD) complex [GO:0009331]; nucleus [GO:0005634]	glycerol-3-phosphate dehydrogenase (NAD+) activity [GO:0141152]; NAD binding [GO:0051287]; protein homodimerization activity [GO:0042803]
J9VU59	WT:uggt	TRUE	0.1	0.000214086	0.933271	1.87251	0.939237	0	1.91751	CNAG_04189		Succinate dehydrogenase [ubiquinone] flavoprotein subunit, mitochondrial (EC 1.3.5.1)	anaerobic respiration [GO:0009061]; mitochondrial electron transport, succinate to ubiquinone [GO:0006121]; tricarboxylic acid cycle [GO:0006099]	mitochondrial respiratory chain complex II, succinate dehydrogenase complex (ubiquinone) [GO:0005749]; plasma membrane [GO:0005886]	electron transfer activity [GO:0009055]; flavin adenine dinucleotide binding [GO:0050660]; succinate dehydrogenase (quinone) activity [GO:0008177]
T2BP63	WT:uggt	TRUE	0.2	0.333085	-2.45106	-2.66041	-0.209347	0	0.864929	CNAG_05747	VTA1	Vacuolar protein sorting-associated protein VTA1, variant 2	late endosome to vacuole transport via multivesicular body sorting pathway [GO:0032511]; protein transport [GO:0015031]	endosome membrane [GO:0010008]; multivesicular body [GO:0005771]
J9VUS7	WT:uggt	TRUE	0.1	0.118213	-2.28855	-1.49331	0.795242	0	1.73537	CNAG_02386		N-acetyltransferase domain-containing protein		membrane [GO:0016020]	N-acetyltransferase activity [GO:0008080]
T2BNZ0	WT:uggt	TRUE	0.4	0.277904	5.67809	5.3898	-0.28829	0	0.818872	CNAG_01152		40S ribosomal protein S6	translation [GO:0006412]	ribonucleoprotein complex [GO:1990904]; ribosome [GO:0005840]	structural constituent of ribosome [GO:0003735]
J9W3F0	WT:uggt	TRUE	0.1	0.219007	1.32252	1.13653	-0.185986	0	0.879048	CNAG_06489		Adenosine kinase (AK) (EC 2.7.1.20) (Adenosine 5'-phosphotransferase)	AMP salvage [GO:0044209]; purine nucleobase metabolic process [GO:0006144]; purine ribonucleoside salvage [GO:0006166]	cytosol [GO:0005829]; nucleus [GO:0005634]	adenosine kinase activity [GO:0004001]; ATP binding [GO:0005524]
J9VMY2	WT:uggt	TRUE	0.4	0.229289	2.59654	2.51777	-0.0787718	0	0.946863	CNAG_02212	TIF32	Eukaryotic translation initiation factor 3 subunit A (eIF3a) (Eukaryotic translation initiation factor 3 110 kDa subunit homolog) (eIF3 p110) (Translation initiation factor eIF3, p110 subunit homolog)	formation of cytoplasmic translation initiation complex [GO:0001732]; translation reinitiation [GO:0002188]	eukaryotic 43S preinitiation complex [GO:0016282]; eukaryotic 48S preinitiation complex [GO:0033290]; eukaryotic translation initiation factor 3 complex, eIF3e [GO:0071540]; eukaryotic translation initiation factor 3 complex, eIF3m [GO:0071541]; multi-eIF complex [GO:0043614]	mRNA binding [GO:0003729]; translation initiation factor activity [GO:0003743]
J9VEX3	WT:uggt	TRUE	0.7	0.706996	0.172814	-0.0574056	-0.23022	0	0.852505	CNAG_00747		Succinate--CoA ligase [ADP-forming] subunit beta, mitochondrial (EC 6.2.1.5) (Succinyl-CoA synthetase beta chain) (SCS-beta)	succinyl-CoA metabolic process [GO:0006104]; tricarboxylic acid cycle [GO:0006099]	cytosol [GO:0005829]; mitochondrion [GO:0005739]; succinate-CoA ligase complex [GO:0042709]	ATP binding [GO:0005524]; magnesium ion binding [GO:0000287]; succinate-CoA ligase (ADP-forming) activity [GO:0004775]
J9VP87	WT:uggt	TRUE	0.7	0.812899	-0.412859	-0.596708	-0.183849	0	0.880351	CNAG_04000		Cytochrome c oxidase assembly protein subunit 11		mitochondrial inner membrane [GO:0005743]	copper ion binding [GO:0005507]
J9VYM3	WT:uggt	TRUE	1	0.421653	5.95261	6.12695	0.174339	0	1.12845	CNAG_06291		Deacetylase	carbohydrate metabolic process [GO:0005975]; cell wall organization [GO:0071555]	plasma membrane [GO:0005886]; side of membrane [GO:0098552]	hydrolase activity, acting on carbon-nitrogen (but not peptide) bonds [GO:0016810]; metal ion binding [GO:0046872]
J9VJB8	WT:uggt	TRUE	0.1	0.00115038	-0.303843	0.254925	0.558768	0	1.47301	CNAG_04001		Proteasome subunit alpha type	proteasomal protein catabolic process [GO:0010498]; ubiquitin-dependent protein catabolic process [GO:0006511]	cytosol [GO:0005829]; nucleus [GO:0005634]; proteasome core complex, alpha-subunit complex [GO:0019773]
J9W4A3	WT:uggt	TRUE	0.1	0.00141617	-0.926642	-0.173954	0.752688	0	1.68493	CNAG_05644		2-nitropropane dioxygenase			dioxygenase activity [GO:0051213]; nitronate monooxygenase activity [GO:0018580]
J9VGC6	WT:uggt	TRUE	0.7	0.549674	0.489956	0.330829	-0.159127	0	0.895567	CNAG_03922		NmrA-like domain-containing protein
J9VU35	WT:uggt	TRUE	0.4	0.22304	-2.2959	-1.72682	0.56908	0	1.48358	CNAG_04166		Smad nuclear-interacting protein 1	maintenance of RNA location [GO:0051237]; miRNA processing [GO:0035196]; mRNA splicing, via spliceosome [GO:0000398]; negative regulation of protein dephosphorylation [GO:0035308]	nuclear speck [GO:0016607]	mRNA binding [GO:0003729]; protein serine/threonine phosphatase inhibitor activity [GO:0004865]
J9VSF5	WT:uggt	TRUE	1	0.642339	-4.44446	-4.11557	0.328892	0	1.25605	CNAG_06832		Glucosidase (Glucosidase, variant 2)	(1->6)-beta-D-glucan biosynthetic process [GO:0006078]; fungal-type cell wall organization [GO:0031505]	plasma membrane [GO:0005886]	glucosidase activity [GO:0015926]
J9VVZ0	WT:uggt	TRUE	0.1	0.000547673	1.25547	0.833569	-0.421903	0	0.746439	CNAG_03565		Plasma membrane ATPase (EC 7.1.2.1)	proton export across plasma membrane [GO:0120029]; regulation of intracellular pH [GO:0051453]	plasma membrane [GO:0005886]	ATP binding [GO:0005524]; ATP hydrolysis activity [GO:0016887]; P-type proton-exporting transporter activity [GO:0008553]
J9VVE0	WT:uggt	TRUE	0.1	0.00143653	1.53261	0.613282	-0.91933	0	0.528754	CNAG_03354		Ribosome biogenesis protein SLX9	maturation of SSU-rRNA from tricistronic rRNA transcript (SSU-rRNA, 5.8S rRNA, LSU-rRNA) [GO:0000462]	90S preribosome [GO:0030686]; nucleolus [GO:0005730]; preribosome, small subunit precursor [GO:0030688]
J9VUG7	WT:uggt	TRUE	0.4	0.261409	-0.0396729	0.215136	0.254809	0	1.19318	CNAG_02470		Phosphoric monoester hydrolase	polyphosphate catabolic process [GO:0006798]; RNA decapping [GO:0110154]	cytoplasm [GO:0005737]; membrane [GO:0016020]	bis(5'-nucleosyl)-tetraphosphatase (symmetrical) activity [GO:0008803]; endopolyphosphatase activity [GO:0000298]; phosphatase activity [GO:0016791]
J9VI99	WT:uggt	TRUE	0.2	0.138361	-0.332868	0.047316	0.380184	0	1.30151	CNAG_07318		AP-1 complex subunit gamma	cytosolic transport [GO:0016482]; endosomal transport [GO:0016197]; Golgi to vacuole transport [GO:0006896]; intracellular protein transport [GO:0006886]	AP-1 adaptor complex [GO:0030121]; cytosol [GO:0005829]	clathrin adaptor activity [GO:0035615]
J9VQ74	WT:uggt	TRUE	0.1	0.124243	-1.73785	-1.1887	0.54915	0	1.46322	CNAG_07163		Preprotein translocase subunit YidC	protein insertion into mitochondrial inner membrane from matrix [GO:0032979]	mitochondrial inner membrane [GO:0005743]	membrane insertase activity [GO:0032977]
Q6U7Q6	WT:uggt	TRUE	0.1	0.0322261	-0.388454	0.292999	0.681453	0	1.60375	CNAG_02830	ERG4	Delta(24(24(1)))-sterol reductase (EC 1.3.1.71)	ergosterol biosynthetic process [GO:0006696]	endoplasmic reticulum membrane [GO:0005789]	delta24(24-1) sterol reductase activity [GO:0000246]
J9VYA2	WT:uggt	TRUE	0.4	0.237143	0.51937	0.109418	-0.409952	0	0.752648	CNAG_06149		Uncharacterized protein
J9VEV2	WT:uggt	TRUE	0.4	0.311701	1.04975	0.493707	-0.556039	0	0.680167	CNAG_00466		Adaptin ear-binding coat-associated protein 2	endocytosis [GO:0006897]	clathrin vesicle coat [GO:0030125]
J9VLB2	WT:uggt	TRUE	0.1	0.00596677	1.10768	0.961402	-0.146281	0	0.903577	CNAG_01113		Uncharacterized protein
J9VWI0	WT:uggt	TRUE	1	0.932601	-0.850551	-0.881033	-0.0304819	0	0.979093	CNAG_04211		Nuclear RNA export factor 1/2	poly(A)+ mRNA export from nucleus [GO:0016973]	nucleus [GO:0005634]	RNA binding [GO:0003723]
J9VI89	WT:uggt	TRUE	0.7	0.889647	2.43113	2.46918	0.0380581	0	1.02673	CNAG_06906	TIF3	Probable eukaryotic translation initiation factor 4H		nucleus [GO:0005634]; P-body [GO:0000932]	poly(A) binding [GO:0008143]; translation initiation factor activity [GO:0003743]
J9VF50	WT:uggt	TRUE	1	0.782067	-0.649091	-0.567728	0.0813628	0	1.05802	CNAG_00816		Autophagy-related protein	autophagosome assembly [GO:0000045]; cellular response to nitrogen starvation [GO:0006995]	autophagosome membrane [GO:0000421]; cytoplasmic vesicle [GO:0031410]; cytosol [GO:0005829]; fungal-type vacuole membrane [GO:0000329]	phosphatidylethanolamine binding [GO:0008429]; ubiquitin protein ligase binding [GO:0031625]
J9VGH8	WT:uggt	TRUE	0.7	0.978443	-0.537433	-0.542355	-0.00492153	0	0.996594	CNAG_03748		Large subunit ribosomal protein L19	cellular response to amino acid starvation [GO:0034198]; regulation of translation [GO:0006417]	cytosol [GO:0005829]; ribosome [GO:0005840]	protein kinase regulator activity [GO:0019887]
J9VVD8	WT:uggt	TRUE	1	0.500106	0.760124	0.629286	-0.130838	0	0.913301	CNAG_06175		26S proteasome regulatory subunit RPN2	proteasome-mediated ubiquitin-dependent protein catabolic process [GO:0043161]; regulation of protein catabolic process [GO:0042176]	nucleus [GO:0005634]; proteasome regulatory particle, base subcomplex [GO:0008540]; proteasome storage granule [GO:0034515]	enzyme regulator activity [GO:0030234]
J9VS14	WT:uggt	TRUE	0.1	0.0130216	-2.24143	-1.45376	0.787665	0	1.72628	CNAG_04322		SMP domain-containing protein
J9VZ58	WT:uggt	TRUE	0.1	0.00471155	1.52689	2.07185	0.544959	0	1.45898	CNAG_01711		Glycerol-3-phosphate O-acyltransferase/dihydroxyacetone phosphate acyltransferase	phospholipid biosynthetic process [GO:0008654]	membrane [GO:0016020]	glycerol-3-phosphate O-acyltransferase activity [GO:0004366]; glycerone-phosphate O-acyltransferase activity [GO:0016287]
J9VV92	WT:uggt	TRUE	0.1	0.200604	-1.48085	-1.01248	0.468373	0	1.38355	CNAG_02190		COX assembly mitochondrial protein		mitochondrial inner membrane [GO:0005743]
J9VI59	WT:uggt	TRUE	0.1	0.0212716	-1.39543	-2.2734	-0.877977	0	0.54413	CNAG_00157		Uncharacterized protein		membrane [GO:0016020]
J9W1Q7	WT:uggt	TRUE	1	0.410522	-0.437222	-0.907147	-0.469925	0	0.722002	CNAG_01834		Tudor domain-containing protein		nucleus [GO:0005634]	DNA-binding transcription repressor activity, RNA polymerase II-specific [GO:0001227]; RNA polymerase II cis-regulatory region sequence-specific DNA binding [GO:0000978]
J9VW40	WT:uggt	TRUE	0.1	0.10848	3.00006	2.58091	-0.419149	0	0.747866	CNAG_06605		Small subunit ribosomal protein S2	translation [GO:0006412]	cytosolic small ribosomal subunit [GO:0022627]	RNA binding [GO:0003723]; structural constituent of ribosome [GO:0003735]
J9VIK6	WT:uggt	TRUE	0.2	0.157337	0.434343	0.801163	0.36682	0	1.28951	CNAG_00271		INO80 complex subunit C	chromatin remodeling [GO:0006338]	Ino80 complex [GO:0031011]
J9VLW1	WT:uggt	TRUE	0.7	0.603066	-1.0573	-1.15462	-0.0973297	0	0.934762	CNAG_02378		H/ACA ribonucleoprotein complex subunit 2 (Nucleolar protein family A member 2)	mRNA splicing, via spliceosome [GO:0000398]; snRNA pseudouridine synthesis [GO:0031120]	box H/ACA snoRNP complex [GO:0031429]	RNA binding [GO:0003723]
J9VPF6	WT:uggt	TRUE	1	0.883875	-2.2022	-2.24509	-0.0428935	0	0.970706	CNAG_07494		U3 small nucleolar ribonucleoprotein protein MPP10	rRNA processing [GO:0006364]	Mpp10 complex [GO:0034457]; small-subunit processome [GO:0032040]; sno(s)RNA-containing ribonucleoprotein complex [GO:0005732]
J9VG26	WT:uggt	TRUE	0.1	0.0433905	2.01965	1.15573	-0.863912	0	0.549461	CNAG_06747		Histone H2A		nucleosome [GO:0000786]; nucleus [GO:0005634]	DNA binding [GO:0003677]; protein heterodimerization activity [GO:0046982]; structural constituent of chromatin [GO:0030527]
J9VLF4	WT:uggt	TRUE	0.1	0.0269315	-3.26546	-2.58159	0.683871	0	1.60644	CNAG_02515		Transmembrane protein 188	positive regulation of protein dephosphorylation [GO:0035307]	cytoplasm [GO:0005737]; Nem1-Spo7 phosphatase complex [GO:0071595]; nucleus [GO:0005634]	protein phosphatase regulator activity [GO:0019888]
J9VQ46	WT:uggt	TRUE	0.1	0.00107331	-0.488461	0.131935	0.620397	0	1.5373	CNAG_02301		Lupus La protein	tRNA processing [GO:0008033]	nucleus [GO:0005634]; ribonucleoprotein complex [GO:1990904]	mRNA binding [GO:0003729]
J9VLS1	WT:uggt	TRUE	1	0.729873	-2.9048	-3.10072	-0.195922	0	0.873015	CNAG_04039		Iron-sulfur cluster assembly protein	intracellular iron ion homeostasis [GO:0006879]; iron-sulfur cluster assembly [GO:0016226]	mitochondrial matrix [GO:0005759]	2 iron, 2 sulfur cluster binding [GO:0051537]; ferrous iron binding [GO:0008198]
J9VP38	WT:uggt	TRUE	0.1	0.0118322	0.877221	1.16871	0.291489	0	1.2239	CNAG_03935		Endothelin-converting enzyme	protein processing [GO:0016485]	plasma membrane [GO:0005886]	metal ion binding [GO:0046872]; metalloendopeptidase activity [GO:0004222]
J9VSI7	WT:uggt	TRUE	0.2	0.0715515	3.54985	3.15944	-0.390415	0	0.76291	CNAG_04828		Histone H3		nucleosome [GO:0000786]; nucleus [GO:0005634]	DNA binding [GO:0003677]; protein heterodimerization activity [GO:0046982]; structural constituent of chromatin [GO:0030527]
J9VPV7	WT:uggt	TRUE	1	0.672767	0.0861138	0.139125	0.0530109	0	1.03743	CNAG_02407		Phospholipase (EC 3.1.4.4)	intracellular signal transduction [GO:0035556]; phosphatidic acid biosynthetic process [GO:0006654]; phospholipid catabolic process [GO:0009395]	intracellular membrane-bounded organelle [GO:0043231]	N-acylphosphatidylethanolamine-specific phospholipase D activity [GO:0070290]; phospholipase D activity [GO:0004630]
J9VPT5	WT:uggt	TRUE	0.2	0.183168	-4.26379	-3.5463	0.717489	0	1.64432	CNAG_02433		Sulfhydryl oxidase (EC 1.8.3.2)		membrane [GO:0016020]; mitochondrion [GO:0005739]	flavin adenine dinucleotide binding [GO:0050660]; flavin-dependent sulfhydryl oxidase activity [GO:0016971]
J9VMB0	WT:uggt	TRUE	1	0.74845	-0.876799	-0.944592	-0.0677935	0	0.954096	CNAG_02208		Ribonucleoside-diphosphate reductase (EC 1.17.4.1)	deoxyribonucleotide biosynthetic process [GO:0009263]	ribonucleoside-diphosphate reductase complex [GO:0005971]	ATP binding [GO:0005524]; ribonucleoside-diphosphate reductase activity, thioredoxin disulfide as acceptor [GO:0004748]
T2BP18	WT:uggt	TRUE	0.2	0.0666243	0.396937	0.639506	0.24257	0	1.1831	CNAG_07982		Uncharacterized protein
J9VW70	WT:uggt	TRUE	0.1	0.0554062	-0.0329461	-0.963636	-0.930689	0	0.524608	CNAG_06640		Carboxypeptidase (EC 3.4.16.-)	proteolysis [GO:0006508]	fungal-type vacuole [GO:0000324]	serine-type carboxypeptidase activity [GO:0004185]
J9VZK0	WT:uggt	TRUE	0.1	0.0565447	-2.29303	-1.91422	0.378807	0	1.30027	CNAG_04460		RNA polymerase II transcription factor		cytoskeleton [GO:0005856]	hydrolase activity [GO:0016787]
J9VMN2	WT:uggt	TRUE	0.1	0.0692824	4.06916	4.40075	0.331595	0	1.2584	CNAG_02331		Small subunit ribosomal protein S9	ribosomal small subunit biogenesis [GO:0042274]; translation [GO:0006412]	cytosolic small ribosomal subunit [GO:0022627]	rRNA binding [GO:0019843]; structural constituent of ribosome [GO:0003735]
J9VKN8	WT:uggt	TRUE	0.1	0.000534515	-2.09217	-1.09691	0.995259	0	1.99344	CNAG_03674		2-oxoglutarate dehydrogenase, mitochondrial (EC 1.2.4.2) (2-oxoglutarate dehydrogenase complex component E1)	tricarboxylic acid cycle [GO:0006099]	cytosol [GO:0005829]; mitochondrion [GO:0005739]; oxoglutarate dehydrogenase complex [GO:0045252]	oxoglutarate dehydrogenase (succinyl-transferring) activity [GO:0004591]; thiamine pyrophosphate binding [GO:0030976]
J9VKP4	WT:uggt	TRUE	0.1	0.0349687	-0.0444386	-0.930099	-0.88566	0	0.54124	CNAG_01109		Uncharacterized protein
J9VQN0	WT:uggt	TRUE	0.7	0.765848	0.272785	0.403227	0.130442	0	1.09463	CNAG_02092		Protein EFR3	protein localization to plasma membrane [GO:0072659]	plasma membrane [GO:0005886]
J9VQ22	WT:uggt	TRUE	0.2	0.0745237	-1.06016	-1.33868	-0.278519	0	0.824437	CNAG_02891		Endoplasmic reticulum protein		mitochondrion [GO:0005739]	thiosulfate sulfurtransferase activity [GO:0004792]
J9VM82	WT:uggt	TRUE	0.1	0.0545718	3.51192	4.52148	1.00956	0	2.0133	CNAG_05277	SNC2	Vesicle-associated membrane protein 4	vesicle fusion [GO:0006906]	plasma membrane [GO:0005886]; SNARE complex [GO:0031201]	SNAP receptor activity [GO:0005484]; syntaxin binding [GO:0019905]
J9W028	WT:uggt	TRUE	0.4	0.177402	0.416978	0.841438	0.42446	0	1.34207	CNAG_06080	SAC1	Inositol/phosphatidylinositol phosphatase	phosphatidylinositol dephosphorylation [GO:0046856]	endoplasmic reticulum [GO:0005783]; membrane [GO:0016020]	phosphatidylinositol-4-phosphate phosphatase activity [GO:0043812]
J9VP18	WT:uggt	TRUE	0.2	0.115563	-1.87402	-2.36701	-0.492984	0	0.710554	CNAG_00966		Aromatic-L-amino-acid decarboxylase	amino acid metabolic process [GO:0006520]; carboxylic acid metabolic process [GO:0019752]; catecholamine metabolic process [GO:0006584]; serotonin biosynthetic process [GO:0042427]	cytoplasm [GO:0005737]	aromatic-L-amino-acid decarboxylase activity [GO:0004058]; pyridoxal phosphate binding [GO:0030170]
J9VK19	WT:uggt	TRUE	0.4	0.377392	1.42615	1.37266	-0.0534917	0	0.963601	CNAG_02905		Cytochrome c oxidase assembly factor 6	mitochondrial cytochrome c oxidase assembly [GO:0033617]	mitochondrial intermembrane space [GO:0005758]; respiratory chain complex IV [GO:0045277]
J9W1J2	WT:uggt	TRUE	0.1	0.00822881	1.16555	1.82566	0.660104	0	1.5802	CNAG_01733		Pre-mRNA-processing factor 19 (EC 2.3.2.27)	DNA repair [GO:0006281]; mRNA splicing, via spliceosome [GO:0000398]; protein K63-linked ubiquitination [GO:0070534]	cytoplasm [GO:0005737]; Prp19 complex [GO:0000974]; U2-type catalytic step 1 spliceosome [GO:0071006]	ubiquitin protein ligase activity [GO:0061630]
J9VUE6	WT:uggt	TRUE	0.1	0.0202586	1.81654	0.857555	-0.958982	0	0.51442	CNAG_02489		alcohol dehydrogenase (EC 1.1.1.1)		cytoplasm [GO:0005737]	alcohol dehydrogenase (NAD+) activity [GO:0004022]
J9VGH7	WT:uggt	TRUE	0.1	0.00116016	-0.387428	-1.1203	-0.732867	0	0.601707	CNAG_03987		Elongation factor 1 alpha-like protein		cytoplasm [GO:0005737]	GTP binding [GO:0005525]; GTPase activity [GO:0003924]; translation elongation factor activity [GO:0003746]
J9VQH7	WT:uggt	TRUE	0.7	0.402152	1.68354	1.50261	-0.180929	0	0.882135	CNAG_03509		Pyruvate dehydrogenase X component	acetyl-CoA biosynthetic process from pyruvate [GO:0006086]	pyruvate dehydrogenase complex [GO:0045254]	dihydrolipoyllysine-residue acetyltransferase activity [GO:0004742]
J9VT60	WT:uggt	TRUE	0.1	0.0543916	0.455858	0.231761	-0.224096	0	0.856131	CNAG_04570	LHP1	La RNA-binding domain-containing protein LHP1	tRNA processing [GO:0008033]	nucleus [GO:0005634]	mRNA binding [GO:0003729]
J9VL79	WT:uggt	TRUE	0.1	0.0436343	-2.91702	-3.49379	-0.576762	0	0.670467	CNAG_03853		Small COPII coat GTPase SAR1 (Small COPII coat GTPase sar1)	endoplasmic reticulum to Golgi vesicle-mediated transport [GO:0006888]; intracellular protein transport [GO:0006886]; membrane organization [GO:0061024]; positive regulation of protein exit from endoplasmic reticulum [GO:0070863]; regulation of COPII vesicle coating [GO:0003400]; vesicle organization [GO:0016050]	COPII vesicle coat [GO:0030127]; endoplasmic reticulum exit site [GO:0070971]; endoplasmic reticulum membrane [GO:0005789]; Golgi membrane [GO:0000139]	GTP binding [GO:0005525]; GTPase activity [GO:0003924]
J9VXC8	WT:uggt	TRUE	0.1	0.0275571	1.15841	0.760681	-0.397732	0	0.759051	CNAG_01861		26S proteasome non-ATPase regulatory subunit 10		proteasome complex [GO:0000502]
J9VWN5	WT:uggt	TRUE	0.1	0.132406	0.00256492	0.383394	0.380829	0	1.30209	CNAG_04279		RanBP2-type domain-containing protein			metal ion binding [GO:0046872]
J9VZ55	WT:uggt	TRUE	0.1	0.0054421	1.81619	1.68585	-0.130343	0	0.913614	CNAG_04284		PWWP domain-containing protein
J9VMJ7	WT:uggt	TRUE	0.1	0.0545655	1.24825	1.68524	0.43699	0	1.35378	CNAG_02372		Enoyl reductase	very long-chain fatty acid biosynthetic process [GO:0042761]	endoplasmic reticulum membrane [GO:0005789]	oxidoreductase activity, acting on the CH-CH group of donors [GO:0016627]
J9W0F9	WT:uggt	TRUE	1	0.84601	1.12256	1.10137	-0.0211903	0	0.985419	CNAG_06196		Synaptosomal-associated protein, 23kDa	exocytosis [GO:0006887]	plasma membrane [GO:0005886]; SNARE complex [GO:0031201]	SNAP receptor activity [GO:0005484]; syntaxin binding [GO:0019905]
J9VMH6	WT:uggt	TRUE	0.1	0.0060548	0.349812	0.9969	0.647088	0	1.566	CNAG_00745		non-specific serine/threonine protein kinase (EC 2.7.11.1)	intracellular signal transduction [GO:0035556]	cytosol [GO:0005829]	ATP binding [GO:0005524]; protein serine/threonine kinase activity [GO:0004674]
J9VVM7	WT:uggt	TRUE	0.1	0.000208133	0.290011	-0.624284	-0.914295	0	0.530603	CNAG_04776		Homoserine dehydrogenase (HDH) (EC 1.1.1.3)	homoserine biosynthetic process [GO:0009090]; isoleucine biosynthetic process [GO:0009097]; methionine biosynthetic process [GO:0009086]; threonine biosynthetic process [GO:0009088]		homoserine dehydrogenase activity [GO:0004412]; NADP binding [GO:0050661]
J9VXE3	WT:uggt	TRUE	0.1	0.00185984	1.32812	0.343188	-0.984937	0	0.505248	CNAG_04914		Small nuclear ribonucleoprotein G (snRNP-G)	spliceosomal snRNP assembly [GO:0000387]	catalytic step 2 spliceosome [GO:0071013]; precatalytic spliceosome [GO:0071011]; SMN-Sm protein complex [GO:0034719]; spliceosomal tri-snRNP complex [GO:0097526]; U1 snRNP [GO:0005685]; U12-type spliceosomal complex [GO:0005689]; U2 snRNP [GO:0005686]; U2-type prespliceosome [GO:0071004]; U4 snRNP [GO:0005687]; U5 snRNP [GO:0005682]	RNA binding [GO:0003723]
J9VX12	WT:uggt	TRUE	0.1	0.00774444	-2.07935	-1.50324	0.576117	0	1.49083	CNAG_01713		Uncharacterized protein		membrane [GO:0016020]
J9VV48	WT:uggt	TRUE	0.2	0.121162	-1.33091	-0.757509	0.573404	0	1.48803	CNAG_01938		non-specific serine/threonine protein kinase (EC 2.7.11.1)	intracellular signal transduction [GO:0035556]; microtubule cytoskeleton organization [GO:0000226]	cytoplasm [GO:0005737]	ATP binding [GO:0005524]; protein serine kinase activity [GO:0106310]; protein serine/threonine kinase activity [GO:0004674]; tau-protein kinase activity [GO:0050321]
J9VQQ2	WT:uggt	TRUE	0.1	0.0445877	-1.12976	-1.67567	-0.545916	0	0.684956	CNAG_03373		Nascent polypeptide-associated complex subunit alpha-like UBA domain-containing protein
J9VHT2	WT:uggt	TRUE	1	0.723434	-1.88986	-1.94293	-0.053068	0	0.963884	CNAG_00800		nicotinamidase (EC 3.5.1.19) (Nicotinamide deamidase)	pyridine nucleotide biosynthetic process [GO:0019363]		hydrolase activity, acting on carbon-nitrogen (but not peptide) bonds, in linear amides [GO:0016811]; metal ion binding [GO:0046872]
J9VLH4	WT:uggt	TRUE	0.1	0.00135826	1.91003	2.62759	0.71756	0	1.6444	CNAG_00402		Translation initiation factor 4G		eukaryotic translation initiation factor 4F complex [GO:0016281]	mRNA binding [GO:0003729]; translation initiation factor activity [GO:0003743]
J9VPD3	WT:uggt	TRUE	0.7	0.228426	-0.0264822	-0.274783	-0.248301	0	0.841887	CNAG_04050		Small nuclear ribonucleoprotein Sm D3 (Sm-D3) (snRNP core protein D3)	spliceosomal snRNP assembly [GO:0000387]	catalytic step 2 spliceosome [GO:0071013]; commitment complex [GO:0000243]; cytosol [GO:0005829]; pICln-Sm protein complex [GO:0034715]; precatalytic spliceosome [GO:0071011]; SMN-Sm protein complex [GO:0034719]; spliceosomal tri-snRNP complex [GO:0097526]; U1 snRNP [GO:0005685]; U12-type spliceosomal complex [GO:0005689]; U2 snRNP [GO:0005686]; U4 snRNP [GO:0005687]; U5 snRNP [GO:0005682]	RNA binding [GO:0003723]
J9VW54	WT:uggt	TRUE	1	0.859964	1.34195	1.309	-0.0329554	0	0.977416	CNAG_06475		RNA polymerase II degradation factor 1		cytoplasm [GO:0005737]; nucleus [GO:0005634]	ubiquitin binding [GO:0043130]
J9VMY8	WT:uggt	TRUE	0.1	0.0323853	1.62698	1.09103	-0.535952	0	0.689703	CNAG_02753		Endoplasmic reticulum protein	endoplasmic reticulum tubular network organization [GO:0071786]; membrane organization [GO:0061024]	endoplasmic reticulum [GO:0005783]; membrane [GO:0016020]
J9VKF8	WT:uggt	TRUE	0.7	0.912175	0.580135	0.637499	0.0573638	0	1.04056	CNAG_03596		dihydrolipoyllysine-residue succinyltransferase (EC 2.3.1.61)	L-lysine catabolic process to acetyl-CoA via saccharopine [GO:0033512]; tricarboxylic acid cycle [GO:0006099]	cytosol [GO:0005829]; mitochondrion [GO:0005739]; oxoglutarate dehydrogenase complex [GO:0045252]	dihydrolipoyllysine-residue succinyltransferase activity [GO:0004149]
J9VZ23	WT:uggt	TRUE	0.1	0.00224655	-3.84782	-4.82489	-0.977065	0	0.508012	CNAG_06474		RNA-binding protein Musashi	central nervous system development [GO:0007417]; regulation of translation [GO:0006417]	cytoplasm [GO:0005737]	mRNA binding [GO:0003729]
J9VK64	WT:uggt	TRUE	0.1	0.00940493	-1.44823	-0.564956	0.883269	0	1.84455	CNAG_02860		Endo-1,3(4)-beta-glucanase	glucan catabolic process [GO:0009251]		hydrolase activity, hydrolyzing O-glycosyl compounds [GO:0004553]
J9W1B8	WT:uggt	TRUE	0.2	0.0739771	-0.899634	-0.468934	0.4307	0	1.34789	CNAG_05363		Pre-mRNA-splicing factor SYF2	mRNA splicing, via spliceosome [GO:0000398]	catalytic step 2 spliceosome [GO:0071013]; post-mRNA release spliceosomal complex [GO:0071014]; Prp19 complex [GO:0000974]
J9W420	WT:uggt	TRUE	0.1	0.259011	1.29105	0.999956	-0.291098	0	0.81728	CNAG_05534		Pyridoxal reductase		cytoplasm [GO:0005737]	aldo-keto reductase (NADPH) activity [GO:0004033]
J9VY49	WT:uggt	TRUE	0.1	0.00841133	0.922962	-0.00381077	-0.926773	0	0.526034	CNAG_04668		NEDD8-conjugating enzyme UBC12 (EC 2.3.2.34) (NEDD8-conjugating enzyme Ubc12) (RUB1-conjugating enzyme) (Ubiquitin carrier protein 12)			ATP binding [GO:0005524]; NEDD8 transferase activity [GO:0019788]
J9W3D8	WT:uggt	TRUE	0.7	0.211943	-2.18835	-1.82646	0.361888	0	1.28511	CNAG_06468		Nucleolar GTP-binding protein 1	ribosomal large subunit biogenesis [GO:0042273]	nucleolus [GO:0005730]	GTP binding [GO:0005525]; GTPase activity [GO:0003924]; RNA binding [GO:0003723]
J9VVQ1	WT:uggt	TRUE	0.1	0.00210841	0.644865	1.13812	0.493256	0	1.40762	CNAG_06114		Rab family protein		endosome [GO:0005768]; Golgi apparatus [GO:0005794]	GTP binding [GO:0005525]; GTPase activity [GO:0003924]
J9VX03	WT:uggt	TRUE	1	0.895234	-0.712089	-0.68941	0.0226793	0	1.01584	CNAG_05367		Small EDRK-rich factor-like N-terminal domain-containing protein
J9VKK7	WT:uggt	TRUE	0.1	0.00114276	2.54079	1.82353	-0.717258	0	0.608252	CNAG_01148		FK506-binding protein (EC 5.2.1.8)		chromatin [GO:0000785]; nucleolus [GO:0005730]	peptidyl-prolyl cis-trans isomerase activity [GO:0003755]
J9W1I1	WT:uggt	TRUE	0.2	0.0897184	-3.51948	-2.95981	0.559663	0	1.47392	CNAG_01717		Cell differentiation protein rcd1	mRNA catabolic process [GO:0006402]; negative regulation of translation [GO:0017148]	CCR4-NOT core complex [GO:0030015]; P-body [GO:0000932]
J9VXT9	WT:uggt	TRUE	0.4	0.254055	0.229294	0.299127	0.0698328	0	1.0496	CNAG_05998		Rho family protein	cortical cytoskeleton organization [GO:0030865]; establishment or maintenance of cell polarity [GO:0007163]; mitotic cytokinesis [GO:0000281]; motor neuron axon guidance [GO:0008045]; regulation of actin cytoskeleton organization [GO:0032956]; regulation of cell shape [GO:0008360]; small GTPase-mediated signal transduction [GO:0007264]	cell projection [GO:0042995]; cytoplasmic vesicle [GO:0031410]; cytoskeleton [GO:0005856]	GTP binding [GO:0005525]; GTPase activity [GO:0003924]; protein kinase binding [GO:0019901]
J9VHX9	WT:uggt	TRUE	0.2	0.186315	0.539645	0.361942	-0.177703	0	0.884109	CNAG_02883		Rho family protein	cortical cytoskeleton organization [GO:0030865]; establishment or maintenance of cell polarity [GO:0007163]; mitotic cytokinesis [GO:0000281]; motor neuron axon guidance [GO:0008045]; regulation of actin cytoskeleton organization [GO:0032956]; regulation of cell shape [GO:0008360]; small GTPase-mediated signal transduction [GO:0007264]	cell projection [GO:0042995]; cytoplasmic vesicle [GO:0031410]; cytoskeleton [GO:0005856]	GTP binding [GO:0005525]; GTPase activity [GO:0003924]; protein kinase binding [GO:0019901]
J9VGI9	WT:uggt	TRUE	0.1	0.0178361	1.04078	0.718122	-0.322661	0	0.799593	CNAG_04002		BAR domain-containing protein	actin cortical patch localization [GO:0051666]; actin filament organization [GO:0007015]; endocytosis [GO:0006897]; plasma membrane tubulation [GO:0097320]	actin cortical patch [GO:0030479]; mating projection tip [GO:0043332]; medial cortex [GO:0031097]; Rvs161p-Rvs167p complex [GO:1990528]	lipid binding [GO:0008289]
P27710	WT:uggt	TRUE	0.1	0.0605426	1.0818	0.489856	-0.591943	0	0.663449	CNAG_04501	TRP1	Multifunctional tryptophan biosynthesis protein [Includes: Anthranilate synthase component 2 (AS) (EC 4.1.3.27) (Anthranilate synthase, glutamine amidotransferase component); Indole-3-glycerol phosphate synthase (IGPS) (EC 4.1.1.48); N-(5'-phosphoribosyl)anthranilate isomerase (PRAI) (EC 5.3.1.24)]	glutamine metabolic process [GO:0006541]; tryptophan biosynthetic process [GO:0000162]		anthranilate synthase activity [GO:0004049]; indole-3-glycerol-phosphate lyase activity [GO:0033984]; indole-3-glycerol-phosphate synthase activity [GO:0004425]; phosphoribosylanthranilate isomerase activity [GO:0004640]
J9VRT6	WT:uggt	TRUE	0.4	0.401021	-3.1068	-3.36686	-0.260061	0	0.835053	CNAG_04226		U4/U6.U5 tri-snRNP-associated protein 1	maturation of 5S rRNA [GO:0000481]; mRNA cis splicing, via spliceosome [GO:0045292]	U4/U6 x U5 tri-snRNP complex [GO:0046540]
J9VWS0	WT:uggt	TRUE	0.1	0.000732701	2.98453	3.55937	0.57484	0	1.48951	CNAG_06471		Small subunit ribosomal protein S12	translation [GO:0006412]	small ribosomal subunit [GO:0015935]	structural constituent of ribosome [GO:0003735]
J9VKK0	WT:uggt	TRUE	0.7	0.235302	-0.280665	-0.996031	-0.715366	0	0.609051	CNAG_00083		Uncharacterized protein	cytoplasmic microtubule organization [GO:0031122]; cytoskeleton-dependent intracellular transport [GO:0030705]	cytoplasm [GO:0005737]	dynein light intermediate chain binding [GO:0051959]; microtubule binding [GO:0008017]
J9VJ13	WT:uggt	TRUE	0.7	0.243931	1.32173	0.639608	-0.682118	0	0.623249	CNAG_04952		ADP-ribosylation factor 6	intracellular protein transport [GO:0006886]; protein localization to endosome [GO:0036010]; regulation of dendritic spine development [GO:0060998]; vesicle-mediated transport [GO:0016192]	endocytic vesicle [GO:0030139]; recycling endosome membrane [GO:0055038]	GTP binding [GO:0005525]; GTPase activity [GO:0003924]
J9VSP1	WT:uggt	TRUE	0.1	0.0601441	-1.96131	-1.39799	0.563323	0	1.47767	CNAG_04765		Actin-related protein 2/3 complex subunit 3	Arp2/3 complex-mediated actin nucleation [GO:0034314]; regulation of actin filament polymerization [GO:0030833]	Arp2/3 protein complex [GO:0005885]; cytoplasm [GO:0005737]	actin filament binding [GO:0051015]
J9VLH7	WT:uggt	TRUE	0.1	0.00819982	1.57501	2.51012	0.935106	0	1.91203	CNAG_05036		Uncharacterized protein		membrane [GO:0016020]
J9VPK0	WT:uggt	TRUE	0.1	0.00300446	-0.333593	0.405886	0.739478	0	1.66957	CNAG_07625		Plasma membrane protein		membrane [GO:0016020]
J9VEH0	WT:uggt	TRUE	0.1	0.0292515	-0.61411	-1.54629	-0.932176	0	0.524067	CNAG_00260		Transformer-2 protein	positive regulation of mRNA splicing, via spliceosome [GO:0048026]	spliceosomal complex [GO:0005681]	RNA binding [GO:0003723]
J9VRH0	WT:uggt	TRUE	0.7	0.777087	0.352063	0.247732	-0.104331	0	0.930236	CNAG_00914		Glucosidase	(1->6)-beta-D-glucan biosynthetic process [GO:0006078]; fungal-type cell wall organization [GO:0031505]	plasma membrane [GO:0005886]	glucosidase activity [GO:0015926]
J9VQR0	WT:uggt	TRUE	0.2	0.0564507	-4.08102	-3.73417	0.34685	0	1.27178	CNAG_02068		Stromal membrane-associated protein	endoplasmic reticulum to Golgi vesicle-mediated transport [GO:0006888]; intra-Golgi vesicle-mediated transport [GO:0006891]	cytoplasm [GO:0005737]	GTPase activator activity [GO:0005096]; metal ion binding [GO:0046872]
J9VRW2	WT:uggt	TRUE	0.1	0.01373	-1.35989	-2.09977	-0.739879	0	0.59879	CNAG_04258		Arf/Sar family protein	intracellular protein transport [GO:0006886]; protein localization to Golgi membrane [GO:1903292]; vesicle-mediated transport [GO:0016192]	trans-Golgi network [GO:0005802]	GTP binding [GO:0005525]; GTPase activity [GO:0003924]
J9VT08	WT:uggt	TRUE	0.1	0.000726085	4.11703	4.77118	0.654147	0	1.57368	CNAG_03315	RHO1	GTP-binding protein rhoA	small GTPase-mediated signal transduction [GO:0007264]	cytosol [GO:0005829]; perinuclear endoplasmic reticulum [GO:0097038]; plasma membrane [GO:0005886]	GTP binding [GO:0005525]; GTPase activity [GO:0003924]; protein kinase binding [GO:0019901]
J9W2U5	WT:uggt	TRUE	0.7	0.352415	6.2782	5.94999	-0.328204	0	0.796527	CNAG_06222		Large subunit ribosomal protein L32e	translation [GO:0006412]	cytosolic large ribosomal subunit [GO:0022625]	structural constituent of ribosome [GO:0003735]
J9VY03	WT:uggt	TRUE	0.1	0.0301042	-0.494886	-0.082599	0.412287	0	1.33079	CNAG_04730		G-protein coupled receptors family 1 profile domain-containing protein	adenylate cyclase-activating G protein-coupled receptor signaling pathway [GO:0007189]	plasma membrane [GO:0005886]	G protein-coupled receptor activity [GO:0004930]
J9VXC6	WT:uggt	TRUE	0.4	0.195786	0.149892	-0.414072	-0.563964	0	0.676441	CNAG_03139		Phosphatidylethanolamine N-methyltransferase (PEAMT) (EC 2.1.1.17)	methylation [GO:0032259]; phosphatidylcholine biosynthetic process [GO:0006656]	endoplasmic reticulum membrane [GO:0005789]	phosphatidylethanolamine N-methyltransferase activity [GO:0004608]
J9VPH0	WT:uggt	TRUE	0.7	0.829913	0.227082	0.265159	0.0380775	0	1.02674	CNAG_05229		Stomatin family protein		plasma membrane [GO:0005886]
J9VVJ8	WT:uggt	TRUE	0.2	0.158955	-4.26504	-3.26481	1.00023	0	2.00032	CNAG_07916		Uncharacterized protein		membrane [GO:0016020]
T2BMK6	WT:uggt	TRUE	0.4	0.110127	-1.36628	-1.01266	0.35362	0	1.27776	CNAG_02318		VWFA domain-containing protein
J9VHB6	WT:uggt	TRUE	0.4	0.183906	-1.29273	-2.07869	-0.785966	0	0.579963	CNAG_04063		Selenoprotein W
J9VI78	WT:uggt	TRUE	0.2	0.139678	-2.10989	-2.46545	-0.355561	0	0.781566	CNAG_06891	EFM4	Protein-lysine N-methyltransferase EFM4 (EC 2.1.1.-) (Elongation factor methyltransferase 4)	methylation [GO:0032259]; vesicle-mediated transport [GO:0016192]	cytoplasm [GO:0005737]	protein-lysine N-methyltransferase activity [GO:0016279]
J9VUW7	WT:uggt	TRUE	0.1	0.00285666	0.631051	0.132072	-0.498979	0	0.707608	CNAG_03153	SEC14	Sec14 cytosolic factor
J9VU28	WT:uggt	TRUE	0.1	0.160197	6.5085	6.97153	0.46303	0	1.37843	CNAG_05800		Large subunit ribosomal protein L33-b	cytoplasmic translation [GO:0002181]; ribosomal large subunit biogenesis [GO:0042273]	cytosolic large ribosomal subunit [GO:0022625]	structural constituent of ribosome [GO:0003735]
J9VFT3	WT:uggt	TRUE	0.7	0.515597	0.752043	0.833077	0.0810334	0	1.05778	CNAG_00074		Protein PNS1		plasma membrane [GO:0005886]	transmembrane transporter activity [GO:0022857]
J9VQ10	WT:uggt	TRUE	0.1	0.0862804	-1.6616	-2.24484	-0.583234	0	0.667466	CNAG_02901	LSM4	U6 snRNA-associated Sm-like protein LSm4	nuclear-transcribed mRNA catabolic process [GO:0000956]; P-body assembly [GO:0033962]; spliceosomal snRNP assembly [GO:0000387]	P-body [GO:0000932]; spliceosomal complex [GO:0005681]; spliceosomal tri-snRNP complex [GO:0097526]; U6 snRNP [GO:0005688]	U6 snRNA binding [GO:0017070]
J9VMY1	WT:uggt	TRUE	0.1	0.0168997	0.9088	0.244581	-0.664219	0	0.63103	CNAG_06755		threonine--tRNA ligase (EC 6.1.1.3) (Threonyl-tRNA synthetase)	threonyl-tRNA aminoacylation [GO:0006435]	mitochondrion [GO:0005739]	ATP binding [GO:0005524]; threonine-tRNA ligase activity [GO:0004829]
J9VPL1	WT:uggt	TRUE	0.1	0.000309109	-1.33968	-0.729456	0.610222	0	1.52649	CNAG_03055		Bud site selection protein 20	ribosome biogenesis [GO:0042254]	nucleus [GO:0005634]	nucleic acid binding [GO:0003676]; zinc ion binding [GO:0008270]
J9VQ84	WT:uggt	TRUE	1	0.619586	0.470338	0.297158	-0.17318	0	0.886886	CNAG_01364		guanylate kinase (EC 2.7.4.8)		cytosol [GO:0005829]	ATP binding [GO:0005524]; guanylate kinase activity [GO:0004385]
J9VUD2	WT:uggt	TRUE	1	0.500659	-1.1299	-1.21789	-0.0879937	0	0.94083	CNAG_02502		ATP-dependent RNA helicase DBP3 (EC 3.6.4.13) (ATP-dependent RNA helicase dbp3)	rRNA processing [GO:0006364]	nucleolus [GO:0005730]	ATP binding [GO:0005524]; hydrolase activity [GO:0016787]; RNA binding [GO:0003723]; RNA helicase activity [GO:0003724]
J9VI54	WT:uggt	TRUE	0.4	0.304333	-4.1622	-3.52023	0.641972	0	1.56046	CNAG_06728		Kinesin	microtubule-based movement [GO:0007018]	cytoskeleton [GO:0005856]	ATP binding [GO:0005524]; microtubule binding [GO:0008017]; microtubule motor activity [GO:0003777]
J9VWN8	WT:uggt	TRUE	0.1	0.0260116	-1.35905	-0.739327	0.619725	0	1.53658	CNAG_04283	FLC1	TRP-like ion channel protein flc1 (EC 7.-.-.-)	fungal-type cell wall biogenesis [GO:0009272]; transmembrane transport [GO:0055085]	endoplasmic reticulum membrane [GO:0005789]
J9VV06	WT:uggt	TRUE	0.2	0.0634747	-1.62826	-2.23603	-0.607771	0	0.65621	CNAG_01897		Bromodomain-containing factor 1	chromatin remodeling [GO:0006338]; regulation of DNA-templated transcription [GO:0006355]	chromatin [GO:0000785]; nucleus [GO:0005634]	lysine-acetylated histone binding [GO:0070577]
J9VF17	WT:uggt	TRUE	0.1	0.000447337	1.33975	2.06884	0.729083	0	1.65758	CNAG_00546	CHS4	Chitin synthase 4 (EC 2.4.1.16)	cell wall organization [GO:0071555]; fungal-type cell wall chitin biosynthetic process [GO:0034221]	cell septum [GO:0030428]; plasma membrane [GO:0005886]	chitin synthase activity [GO:0004100]
J9VN29	WT:uggt	TRUE	0.1	0.0266521	1.77429	1.09992	-0.674379	0	0.626602	CNAG_01291		Nucleic acid-binding protein			single-stranded DNA binding [GO:0003697]
J9VP95	WT:uggt	TRUE	0.7	0.551826	-2.21162	-2.17874	0.032876	0	1.02305	CNAG_00873		Alpha 1,2-mannosyltransferase	mannan biosynthetic process [GO:0046354]; protein mannosylation [GO:0035268]	Golgi apparatus [GO:0005794]	alpha-1,2-mannosyltransferase activity [GO:0000026]
J9VMC6	WT:uggt	TRUE	0.1	0.0678471	-1.15729	-0.255815	0.901477	0	1.86798	CNAG_02188		Uncharacterized protein
J9VSU2	WT:uggt	TRUE	0.1	0.180094	7.17197	7.56427	0.392302	0	1.31249	CNAG_04884		Large ribosomal subunit protein eL42 (60S ribosomal protein L41) (60S ribosomal protein L44)	translation [GO:0006412]	cytosolic large ribosomal subunit [GO:0022625]	structural constituent of ribosome [GO:0003735]
J9W1F6	WT:uggt	TRUE	0.1	0.0457424	3.01574	3.26814	0.252405	0	1.19119	CNAG_05411	LPI9	Endoglucanase (EC 3.2.1.4)	cellulose catabolic process [GO:0030245]	membrane [GO:0016020]	cellulase activity [GO:0008810]
J9VMB2	WT:uggt	TRUE	0.1	0.202539	0.0814302	0.40196	0.32053	0	1.24879	CNAG_05309		Uncharacterized protein
J9VIQ4	WT:uggt	TRUE	0.4	0.468541	-1.32706	-1.44246	-0.115396	0	0.923129	CNAG_03789		Ribosome assembly factor mrt4	nuclear-transcribed mRNA catabolic process [GO:0000956]; ribosomal large subunit biogenesis [GO:0042273]; rRNA processing [GO:0006364]	cytoplasm [GO:0005737]; nucleolus [GO:0005730]; preribosome, large subunit precursor [GO:0030687]	RNA binding [GO:0003723]
J9W1K0	WT:uggt	TRUE	0.1	0.0477457	0.724821	0.459679	-0.265142	0	0.832117	CNAG_07600		beta-glucosidase (EC 3.2.1.21)	glucan catabolic process [GO:0009251]		beta-glucosidase activity [GO:0008422]
J9VTY3	WT:uggt	TRUE	0.7	0.444763	-2.05761	-1.69525	0.362366	0	1.28553	CNAG_05751		Large ribosomal subunit protein bL21m		mitochondrial large ribosomal subunit [GO:0005762]	structural constituent of ribosome [GO:0003735]
J9VVJ6	WT:uggt	TRUE	0.2	0.0824507	-2.21985	-2.61702	-0.397165	0	0.759349	CNAG_02079		Cytoplasmic protein	oligosaccharide metabolic process [GO:0009311]; protein N-linked glycosylation [GO:0006487]		Glc3Man9GlcNAc2 oligosaccharide glucosidase activity [GO:0004573]
J9VR18	WT:uggt	TRUE	0.1	0.0128235	0.240539	-0.151409	-0.391948	0	0.7621	CNAG_01092		Uncharacterized protein
J9VL70	WT:uggt	TRUE	1	0.876828	-4.45045	-4.57441	-0.123954	0	0.917669	CNAG_01157		Polynucleotide adenylyltransferase	RNA 3' uridylation [GO:0071076]		RNA uridylyltransferase activity [GO:0050265]
J9VML5	WT:uggt	TRUE	0.1	0.103001	-0.634978	-1.04715	-0.412171	0	0.751492	CNAG_02351		GH18 domain-containing protein	chitin catabolic process [GO:0006032]; polysaccharide catabolic process [GO:0000272]		chitinase activity [GO:0004568]
J9VW28	WT:uggt	TRUE	0.1	0.0203804	-0.336952	-1.10122	-0.764273	0	0.58875	CNAG_06215		Uncharacterized protein
J9VDY5	WT:uggt	TRUE	1	0.727278	-1.47301	-1.36913	0.10388	0	1.07466	CNAG_00111		Splicing factor 3A subunit 1	mRNA cis splicing, via spliceosome [GO:0045292]; regulation of alternative mRNA splicing, via spliceosome [GO:0000381]	catalytic step 2 spliceosome [GO:0071013]; U2 snRNP [GO:0005686]; U2-type prespliceosome [GO:0071004]	RNA binding [GO:0003723]
J9VEM3	WT:uggt	TRUE	0.7	0.327981	0.307898	-0.0751826	-0.383081	0	0.766798	CNAG_00663		Chitin-binding type-3 domain-containing protein	carbohydrate metabolic process [GO:0005975]	extracellular region [GO:0005576]	carbohydrate binding [GO:0030246]; hydrolase activity, hydrolyzing O-glycosyl compounds [GO:0004553]
J9VKC4	WT:uggt	TRUE	0.1	0.000252235	2.74811	3.74626	0.998146	0	1.99743	CNAG_02817	SEC4/SAV1	GTP-binding protein ypt2	endocytic recycling [GO:0032456]; Golgi vesicle fusion to target membrane [GO:0048210]; protein localization to plasma membrane [GO:0072659]; protein secretion [GO:0009306]; regulation of exocytosis [GO:0017157]; vesicle docking involved in exocytosis [GO:0006904]	endosome [GO:0005768]; plasma membrane [GO:0005886]; trans-Golgi network transport vesicle [GO:0030140]	GTP binding [GO:0005525]; GTPase activity [GO:0003924]
J9W389	WT:uggt	TRUE	0.1	0.250324	-0.465255	-0.759877	-0.294622	0	0.815286	CNAG_06412		rRNA-processing protein EFG1 (rRNA-processing protein efg1)	maturation of SSU-rRNA from tricistronic rRNA transcript (SSU-rRNA, 5.8S rRNA, LSU-rRNA) [GO:0000462]	nucleolus [GO:0005730]; preribosome, small subunit precursor [GO:0030688]
J9VPS2	WT:uggt	TRUE	0.1	0.0963301	-1.87336	-0.805926	1.06743	0	2.0957	CNAG_02982		U3 small nucleolar RNA-associated protein 13	endonucleolytic cleavage in 5'-ETS of tricistronic rRNA transcript (SSU-rRNA, 5.8S rRNA, LSU-rRNA) [GO:0000480]; endonucleolytic cleavage to generate mature 5'-end of SSU-rRNA from (SSU-rRNA, 5.8S rRNA, LSU-rRNA) [GO:0000472]	90S preribosome [GO:0030686]; nucleolus [GO:0005730]; small-subunit processome [GO:0032040]	U3 snoRNA binding [GO:0034511]
J9VNH4	WT:uggt	TRUE	0.1	0.000118835	-0.834852	0.0432697	0.878121	0	1.83798	CNAG_05694		Casein kinase II subunit alpha (CK II alpha) (EC 2.7.11.1)	DNA damage response [GO:0006974]; regulation of cell cycle [GO:0051726]; regulation of transcription by RNA polymerase I [GO:0006356]; regulation of transcription by RNA polymerase III [GO:0006359]	cytosol [GO:0005829]; nucleus [GO:0005634]; protein kinase CK2 complex [GO:0005956]	ATP binding [GO:0005524]; metal ion binding [GO:0046872]; protein serine kinase activity [GO:0106310]; protein serine/threonine kinase activity [GO:0004674]
J9VLU2	WT:uggt	TRUE	0.1	0.00712037	-0.240711	-0.831677	-0.590965	0	0.663899	CNAG_04064		CHCH domain-containing protein	mitochondrion organization [GO:0007005]	mitochondrion [GO:0005739]; nucleus [GO:0005634]
J9VDQ4	WT:uggt	TRUE	0.7	0.570277	-3.55465	-3.72125	-0.166606	0	0.890936	CNAG_00025	VCX1	Vacuolar calcium ion transporter (Vacuolar calcium exchanger)	calcium ion import into vacuole [GO:0140146]; intracellular calcium ion homeostasis [GO:0006874]	fungal-type vacuole membrane [GO:0000329]; vacuolar membrane [GO:0005774]	calcium:proton antiporter activity [GO:0015369]
J9VNF9	WT:uggt	TRUE	0.1	0.00216819	-0.568483	-1.35834	-0.789859	0	0.5784	CNAG_01197		Ran GTPase-activating protein 1	nucleocytoplasmic transport [GO:0006913]	cytosol [GO:0005829]; nucleus [GO:0005634]; perinuclear region of cytoplasm [GO:0048471]	GTPase activator activity [GO:0005096]; small GTPase binding [GO:0031267]
J9VQX7	WT:uggt	TRUE	0.7	0.29543	0.49017	0.770493	0.280323	0	1.21447	CNAG_04137		Arrestin C-terminal-like domain-containing protein	division septum assembly [GO:0000917]	division septum [GO:0000935]
J9VVZ2	WT:uggt	TRUE	0.4	0.234172	-3.39724	-4.11352	-0.716282	0	0.608664	CNAG_06404		TNFR-Cys domain-containing protein
T2BQ71	WT:uggt	TRUE	0.2	0.0837591	-0.612	-0.473481	0.138519	0	1.10077	CNAG_03793		Uncharacterized protein	translation [GO:0006412]	mitochondrial small ribosomal subunit [GO:0005763]	structural constituent of ribosome [GO:0003735]
J9VEU9	WT:uggt	TRUE	0.1	0.000338663	-0.055432	0.902966	0.958398	0	1.94315	CNAG_00461		Glucosidase 2 subunit beta	liver development [GO:0001889]; N-glycan processing [GO:0006491]	glucosidase II complex [GO:0017177]	kinase activity [GO:0016301]
J9VM77	WT:uggt	TRUE	0.1	0.0568969	-0.27623	0.412929	0.689159	0	1.61234	CNAG_00666		Nucleoporin nsp1
J9VMX0	WT:uggt	TRUE	0.1	0.00317872	0.623519	-0.0902481	-0.713767	0	0.609726	CNAG_02222		Phosphopantothenate-cysteine ligase	coenzyme A biosynthetic process [GO:0015937]	cytoplasm [GO:0005737]; nucleus [GO:0005634]	phosphopantothenate--cysteine ligase activity [GO:0004632]
J9VG82	WT:uggt	TRUE	0.7	0.685436	-3.95152	-3.68689	0.264628	0	1.20133	CNAG_07028		26S proteasome regulatory subunit N11	proteasome-mediated ubiquitin-dependent protein catabolic process [GO:0043161]	proteasome regulatory particle, lid subcomplex [GO:0008541]	metallopeptidase activity [GO:0008237]; proteasome binding [GO:0070628]
J9VK47	WT:uggt	TRUE	0.1	0.0907619	-1.1245	0.66114	1.78564	0	3.44772	CNAG_06866		Uncharacterized protein
J9VQG7	WT:uggt	TRUE	0.1	0.00757164	-1.17017	-2.08126	-0.911084	0	0.531785	CNAG_02772		Phosphoglycerate mutase		cytoplasm [GO:0005737]	phosphatase activity [GO:0016791]
J9VIF5	WT:uggt	TRUE	0.1	0.00477653	0.19758	0.419033	0.221453	0	1.16591	CNAG_07799		ABC transporter		membrane [GO:0016020]	ABC-type transporter activity [GO:0140359]; ATP binding [GO:0005524]; ATP hydrolysis activity [GO:0016887]
J9VGT6	WT:uggt	TRUE	0.1	0.00293822	0.948752	1.50813	0.559377	0	1.47363	CNAG_07499	CHS8	Chitin synthase 8 (EC 2.4.1.16)	cell wall organization [GO:0071555]; fungal-type cell wall chitin biosynthetic process [GO:0034221]	cell septum [GO:0030428]; plasma membrane [GO:0005886]	chitin synthase activity [GO:0004100]
J9VHA2	WT:uggt	TRUE	0.7	0.465487	-2.57458	-2.27589	0.298693	0	1.23003	CNAG_04048		Actin-related protein 4	DNA repair [GO:0006281]; nervous system development [GO:0007399]; regulation of transcription by RNA polymerase II [GO:0006357]	NuA4 histone acetyltransferase complex [GO:0035267]; SWI/SNF complex [GO:0016514]	chromatin binding [GO:0003682]
J9VY77	WT:uggt	TRUE	0.2	0.110013	-0.0811332	-0.973637	-0.892504	0	0.538678	CNAG_04631		Ribitol kinase	pentose metabolic process [GO:0019321]	cytoplasm [GO:0005737]	D-ribulokinase activity [GO:0019150]
J9VJF1	WT:uggt	TRUE	1	0.729674	4.14345	3.99912	-0.144333	0	0.904798	CNAG_00604		RING-type domain-containing protein	proteasome-mediated ubiquitin-dependent protein catabolic process [GO:0043161]		ubiquitin protein ligase activity [GO:0061630]
J9VKK2	WT:uggt	TRUE	0.2	0.126917	2.9617	3.33187	0.370172	0	1.29251	CNAG_01153		Small subunit ribosomal protein S13e	translation [GO:0006412]	cytosolic small ribosomal subunit [GO:0022627]; nucleolus [GO:0005730]	small ribosomal subunit rRNA binding [GO:0070181]; structural constituent of ribosome [GO:0003735]
J9VLD8	WT:uggt	TRUE	0.4	0.419571	1.1502	0.972085	-0.178113	0	0.883858	CNAG_05001		Thioredoxin domain-containing protein		cytosol [GO:0005829]	protein-disulfide reductase (NAD(P)H) activity [GO:0047134]
J9VLJ4	WT:uggt	TRUE	0.1	0.0612406	-1.06845	-1.45392	-0.385476	0	0.765526	CNAG_01024		Translocation protein SEC72	protein folding [GO:0006457]	cytosol [GO:0005829]; nucleus [GO:0005634]	Hsp70 protein binding [GO:0030544]; Hsp90 protein binding [GO:0051879]
J9VKM3	WT:uggt	TRUE	0.7	0.315217	-1.28011	-1.49847	-0.218359	0	0.859543	CNAG_02718		NAD binding dehydrogenase			nucleotide binding [GO:0000166]
J9VLN4	WT:uggt	TRUE	0.1	0.0248343	2.6707	1.76157	-0.909129	0	0.532506	CNAG_00979	CTR4	Copper transport protein CTR4 (Copper transporter 4)		plasma membrane [GO:0005886]	copper ion transmembrane transporter activity [GO:0005375]
J9VIB4	WT:uggt	TRUE	0.1	0.0162774	-2.46198	-2.68866	-0.226674	0	0.854603	CNAG_07333		ubiquitinyl hydrolase 1 (EC 3.4.19.12)	proteasome-mediated ubiquitin-dependent protein catabolic process [GO:0043161]; regulation of proteasomal protein catabolic process [GO:0061136]		cysteine-type deubiquitinase activity [GO:0004843]; proteasome binding [GO:0070628]
J9VNT4	WT:uggt	TRUE	0.4	0.191284	1.35673	1.24122	-0.115511	0	0.923055	CNAG_05818	CHS5	Chitin synthase 5 (EC 2.4.1.16)	cell wall organization [GO:0071555]; fungal-type cell wall chitin biosynthetic process [GO:0034221]	cell septum [GO:0030428]; myosin complex [GO:0016459]; plasma membrane [GO:0005886]	actin binding [GO:0003779]; ATP binding [GO:0005524]; chitin synthase activity [GO:0004100]; cytoskeletal motor activity [GO:0003774]
J9VX45	WT:uggt	TRUE	0.7	0.793874	-0.430628	-0.522731	-0.092103	0	0.938154	CNAG_05599		Uncharacterized protein
J9VKA8	WT:uggt	TRUE	0.2	0.173978	-2.73122	-3.32026	-0.58905	0	0.664781	CNAG_01265		Charged multivesicular body protein 6	late endosome to vacuole transport via multivesicular body sorting pathway [GO:0032511]; vesicle budding from membrane [GO:0006900]	ESCRT III complex [GO:0000815]; multivesicular body [GO:0005771]
J9VKU4	WT:uggt	TRUE	0.1	0.0174827	0.362495	1.16041	0.797915	0	1.73859	CNAG_01055		Phospholipid transporter		membrane [GO:0016020]	transmembrane transporter activity [GO:0022857]
J9VT59	WT:uggt	TRUE	0.7	0.493402	-4.2174	-3.91576	0.301644	0	1.23255	CNAG_01262		Guanine nucleotide-binding protein subunit beta	G protein-coupled receptor signaling pathway [GO:0007186]	cytoplasm [GO:0005737]; heterotrimeric G-protein complex [GO:0005834]	signaling receptor complex adaptor activity [GO:0030159]
J9VF01	WT:uggt	TRUE	0.7	0.385179	-1.34297	-1.08825	0.254719	0	1.1931	CNAG_00531		Potassium/sodium efflux P-type ATPase, fungal-type	intracellular calcium ion homeostasis [GO:0006874]	plasma membrane [GO:0005886]	ATP binding [GO:0005524]; ATP hydrolysis activity [GO:0016887]; P-type potassium transmembrane transporter activity [GO:0008556]; P-type sodium transporter activity [GO:0008554]
J9VK72	WT:uggt	TRUE	0.1	0.067618	-0.523577	0.579059	1.10264	0	2.14747	CNAG_06839		Phosphatidyl-N-methylethanolamine N-methyltransferase (EC 2.1.1.71) (Phospholipid methyltransferase) (PLMT)	methylation [GO:0032259]; phosphatidylcholine biosynthetic process [GO:0006656]	endoplasmic reticulum membrane [GO:0005789]; mitochondrial membrane [GO:0031966]	phosphatidyl-N-dimethylethanolamine N-methyltransferase activity [GO:0080101]; phosphatidyl-N-methylethanolamine N-methyltransferase activity [GO:0000773]; phosphatidylethanolamine N-methyltransferase activity [GO:0004608]
J9VSM5	WT:uggt	TRUE	0.1	0.0962719	-0.00102808	-0.327086	-0.326058	0	0.797713	CNAG_02196		Septin	actomyosin contractile ring assembly [GO:0000915]; cellular bud neck septin ring organization [GO:0032186]; division septum assembly [GO:0000917]; protein localization to bud neck [GO:0097271]	cell division site [GO:0032153]; cytosol [GO:0005829]; microtubule cytoskeleton [GO:0015630]; septin complex [GO:0031105]; septin ring [GO:0005940]	GTP binding [GO:0005525]; GTPase activity [GO:0003924]; molecular adaptor activity [GO:0060090]
J9VIG2	WT:uggt	TRUE	0.1	0.0529892	-2.32576	-1.69285	0.632914	0	1.55069	CNAG_03696		Uncharacterized protein		membrane [GO:0016020]
J9VW18	WT:uggt	TRUE	1	0.941692	0.814708	0.819065	0.00435707	0	1.00302	CNAG_04604		tryptophan--tRNA ligase (EC 6.1.1.2) (Tryptophanyl-tRNA synthetase)	tryptophanyl-tRNA aminoacylation [GO:0006436]	cytoplasm [GO:0005737]	ATP binding [GO:0005524]; tryptophan-tRNA ligase activity [GO:0004830]
J9VJL1	WT:uggt	TRUE	0.1	0.0610126	-1.07006	-0.700236	0.369828	0	1.2922	CNAG_07814		Replication termination factor 2	mitotic DNA replication termination [GO:1902979]; site-specific DNA replication termination at RTS1 barrier [GO:0071171]	nucleus [GO:0005634]
J9VPA6	WT:uggt	TRUE	0.1	0.000158245	0.691079	-0.0516874	-0.742767	0	0.597592	CNAG_03098		Mitochondrial import inner membrane translocase subunit TIM16 (Mitochondrial import inner membrane translocase subunit tim16) (Presequence translocated-associated motor subunit PAM16)	protein import into mitochondrial matrix [GO:0030150]	TIM23 mitochondrial import inner membrane translocase complex [GO:0005744]
J9VPD8	WT:uggt	TRUE	0.7	0.162505	0.587844	1.12542	0.537579	0	1.45154	CNAG_05179	QCR2	Cytochrome b-c1 complex subunit 2, mitochondrial	mitochondrial electron transport, ubiquinol to cytochrome c [GO:0006122]	mitochondrial respiratory chain complex III [GO:0005750]	metal ion binding [GO:0046872]; ubiquinol-cytochrome-c reductase activity [GO:0008121]
J9VPE0	WT:uggt	TRUE	0.1	0.0968806	7.18303	6.7751	-0.407925	0	0.753707	CNAG_03127		Small subunit ribosomal protein S23	translation [GO:0006412]	cytosolic small ribosomal subunit [GO:0022627]	structural constituent of ribosome [GO:0003735]
J9VXD1	WT:uggt	TRUE	0.1	0.000484918	1.68822	0.695234	-0.992984	0	0.502438	CNAG_03144		peptide-methionine (S)-S-oxide reductase (EC 1.8.4.11) (Peptide-methionine (S)-S-oxide reductase)			peptide-methionine (S)-S-oxide reductase activity [GO:0008113]
J9VDB3	WT:uggt	TRUE	0.7	0.89902	0.12979	0.147508	0.0177187	0	1.01236	CNAG_00140		U1 small nuclear ribonucleoprotein 70kDa	mRNA splicing, via spliceosome [GO:0000398]	precatalytic spliceosome [GO:0071011]; U1 snRNP [GO:0005685]; U2-type prespliceosome [GO:0071004]	mRNA binding [GO:0003729]; U1 snRNA binding [GO:0030619]
J9VW53	WT:uggt	TRUE	1	0.912422	-1.74696	-1.71359	0.0333704	0	1.0234	CNAG_04122		Galactose dehydrogenase	dehydro-D-arabinono-1,4-lactone biosynthetic process [GO:0070485]; L-ascorbic acid biosynthetic process [GO:0019853]	cytosol [GO:0005829]	D-arabinose 1-dehydrogenase [NAD(P)+] activity [GO:0045290]; L-galactose dehydrogenase activity [GO:0010349]
J9VJP0	WT:uggt	TRUE	0.1	0.0475508	3.25782	2.70498	-0.552839	0	0.681678	CNAG_03049		Ubiquitin-like domain-containing protein	protein sumoylation [GO:0016925]	PML body [GO:0016605]; septin ring [GO:0005940]	protein tag activity [GO:0031386]; ubiquitin-like protein ligase binding [GO:0044389]
J9VKI8	WT:uggt	TRUE	0.1	0.000125154	-0.0834486	0.877876	0.961325	0	1.9471	CNAG_01168		H/ACA ribonucleoprotein complex subunit CBF5	box H/ACA sno(s)RNA 3'-end processing [GO:0000495]; mRNA pseudouridine synthesis [GO:1990481]; rRNA pseudouridine synthesis [GO:0031118]; snRNA pseudouridine synthesis [GO:0031120]	box H/ACA snoRNP complex [GO:0031429]	pseudouridine synthase activity [GO:0009982]; RNA binding [GO:0003723]
J9VQ68	WT:uggt	TRUE	0.7	0.775624	-1.84815	-2.00222	-0.154078	0	0.898707	CNAG_03395		NifU-like protein c	iron-sulfur cluster assembly [GO:0016226]; protein maturation by iron-sulfur cluster transfer [GO:0097428]	mitochondrion [GO:0005739]	4 iron, 4 sulfur cluster binding [GO:0051539]; iron ion binding [GO:0005506]
J9VQ24	WT:uggt	TRUE	0.1	0.0887174	2.87174	2.08431	-0.787429	0	0.579376	CNAG_01428		Eukaryotic translation initiation factor 5A (eIF-5A)	positive regulation of translational elongation [GO:0045901]; positive regulation of translational termination [GO:0045905]		ribosome binding [GO:0043022]; RNA binding [GO:0003723]; translation elongation factor activity [GO:0003746]; translation initiation factor activity [GO:0003743]
J9VX35	WT:uggt	TRUE	0.1	0.0030568	0.17637	-0.682375	-0.858745	0	0.551432	CNAG_07887		WW domain-containing protein
J9VLJ8	WT:uggt	TRUE	0.2	0.107334	-0.431249	-0.112716	0.318533	0	1.24706	CNAG_03944		Chaperone regulator	protein refolding [GO:0042026]; response to heat [GO:0009408]	cytosol [GO:0005829]; nucleus [GO:0005634]	ATP binding [GO:0005524]; Hsp70 protein binding [GO:0030544]; metal ion binding [GO:0046872]; unfolded protein binding [GO:0051082]
J9VR95	WT:uggt	TRUE	0.4	0.346771	1.19384	1.01334	-0.180498	0	0.882398	CNAG_04235		Large ribosomal subunit protein mL43	mitochondrial translation [GO:0032543]	mitochondrial large ribosomal subunit [GO:0005762]	structural constituent of ribosome [GO:0003735]
J9VX75	WT:uggt	TRUE	0.4	0.289689	0.4794	0.274923	-0.204477	0	0.867853	CNAG_01789		Uncharacterized protein	mitochondrial translation [GO:0032543]	mitochondrial large ribosomal subunit [GO:0005762]	structural constituent of ribosome [GO:0003735]
J9VRY9	WT:uggt	TRUE	0.1	0.0151345	-1.62183	-0.984865	0.636965	0	1.55505	CNAG_07679		Transcription elongation factor	regulation of mRNA 3'-end processing [GO:0031440]; transcription antitermination [GO:0031564]; transcription elongation by RNA polymerase I [GO:0006362]; transcription elongation by RNA polymerase II [GO:0006368]	nucleus [GO:0005634]	RNA polymerase II complex recruiting activity [GO:0001139]; RNA polymerase II transcription regulatory region sequence-specific DNA binding [GO:0000977]; translation elongation factor activity [GO:0003746]; zinc ion binding [GO:0008270]
J9VP34	WT:uggt	TRUE	1	0.50946	0.347542	0.232509	-0.115033	0	0.923361	CNAG_00933		2',3'-cyclic-nucleotide 3'-phosphodiesterase	cyclic nucleotide metabolic process [GO:0009187]		2',3'-cyclic-nucleotide 3'-phosphodiesterase activity [GO:0004113]
J9VRL8	WT:uggt	TRUE	0.1	0.0192035	-2.5705	-1.81799	0.752506	0	1.68472	CNAG_05095		Pod-specific dehydrogenase SAC25			oxidoreductase activity [GO:0016491]
J9VX98	WT:uggt	TRUE	0.1	0.0249896	-0.00858701	-0.46088	-0.452293	0	0.73088	CNAG_04530		DNA-binding protein	negative regulation of proteasomal ubiquitin-dependent protein catabolic process [GO:0032435]; negative regulation of protein K48-linked deubiquitination [GO:1903094]; negative regulation of protein ubiquitination [GO:0031397]	cytoplasm [GO:0005737]; nucleus [GO:0005634]	DNA binding [GO:0003677]; K48-linked polyubiquitin modification-dependent protein binding [GO:0036435]
J9VZ71	WT:uggt	TRUE	0.1	0.132759	-0.866926	-0.258821	0.608105	0	1.52426	CNAG_04304		T-complex protein 1 subunit zeta (CCT-zeta)		chaperonin-containing T-complex [GO:0005832]	ATP binding [GO:0005524]; ATP hydrolysis activity [GO:0016887]; ATP-dependent protein folding chaperone [GO:0140662]; unfolded protein binding [GO:0051082]
J9W0H1	WT:uggt	TRUE	0.1	0.0773157	1.82434	1.37863	-0.445706	0	0.734225	CNAG_07914		Protein phosphatase 2 (Formerly 2A), regulatory subunit A		cytoplasm [GO:0005737]; protein phosphatase type 2A complex [GO:0000159]	protein phosphatase regulator activity [GO:0019888]
J9VMH9	WT:uggt	TRUE	0.1	0.0532509	-0.369204	-0.89209	-0.522886	0	0.695978	CNAG_02400		Uncharacterized protein		cytoplasm [GO:0005737]; nucleus [GO:0005634]; proteasome regulatory particle, lid subcomplex [GO:0008541]	endopeptidase activator activity [GO:0061133]; proteasome binding [GO:0070628]
J9W1A2	WT:uggt	TRUE	0.1	0.0471997	-3.01955	-2.31274	0.706809	0	1.63219	CNAG_01650		Large subunit ribosomal protein L7	translation [GO:0006412]	cytosolic large ribosomal subunit [GO:0022625]	RNA binding [GO:0003723]; structural constituent of ribosome [GO:0003735]
J9VV95	WT:uggt	TRUE	1	0.735478	-1.76655	-1.72538	0.0411667	0	1.02895	CNAG_03293		Pre-rRNA-processing protein TSR2	maturation of SSU-rRNA from tricistronic rRNA transcript (SSU-rRNA, 5.8S rRNA, LSU-rRNA) [GO:0000462]	nucleus [GO:0005634]
J9VYZ8	WT:uggt	TRUE	0.1	0.100648	-0.148261	-1.03974	-0.891483	0	0.53906	CNAG_04203		Uncharacterized protein
J9VY31	WT:uggt	TRUE	0.1	0.00346848	-0.158272	-0.721789	-0.563516	0	0.676651	CNAG_04694		Periodic tryptophan protein 1	rRNA processing [GO:0006364]	nucleus [GO:0005634]
J9VE62	WT:uggt	TRUE	0.1	0.00620325	-0.729286	-0.123469	0.605817	0	1.52184	CNAG_00465		Uncharacterized protein
J9VXZ6	WT:uggt	TRUE	1	0.932817	-1.46508	-1.45405	0.0110325	0	1.00768	CNAG_03360		Uncharacterized protein
J9VKY7	WT:uggt	TRUE	0.7	0.640767	-1.33466	-1.61152	-0.276856	0	0.825388	CNAG_07329		C2H2-type domain-containing protein		nucleus [GO:0005634]	metal ion binding [GO:0046872]
J9W1I8	WT:uggt	TRUE	0.1	0.103864	-1.5115	-0.74761	0.763888	0	1.69806	CNAG_01728		SH3 domain-containing protein	actin cortical patch assembly [GO:0000147]	nucleus [GO:0005634]
J9VH37	WT:uggt	TRUE	1	0.843028	-1.07624	-1.1475	-0.0712637	0	0.951804	CNAG_03968		Polyadenylate-binding protein 2		cytoplasm [GO:0005737]; nucleus [GO:0005634]	poly(A) binding [GO:0008143]
J9VSE2	WT:uggt	TRUE	0.7	0.349223	-0.989998	-0.611998	0.378	0	1.29954	CNAG_02308		DUF3074 domain-containing protein
J9VJ75	WT:uggt	TRUE	0.7	0.627057	-0.448752	-0.401284	0.0474684	0	1.03345	CNAG_05013		RNP domain-containing protein			RNA binding [GO:0003723]
J9VSF6	WT:uggt	TRUE	0.1	0.030931	1.27763	0.874357	-0.403277	0	0.756139	CNAG_04478		Uncharacterized protein
J9VS56	WT:uggt	TRUE	0.1	0.00374557	-0.255659	0.589916	0.845575	0	1.79698	CNAG_02415	ANX1	Annexin C1		cytoplasm [GO:0005737]; nucleus [GO:0005634]; plasma membrane [GO:0005886]	1-phosphatidylinositol binding [GO:0005545]; calcium ion binding [GO:0005509]; calcium-dependent phospholipid binding [GO:0005544]; heparin binding [GO:0008201]; phosphatidylethanolamine binding [GO:0008429]; phosphatidylserine binding [GO:0001786]
J9VMT9	WT:uggt	TRUE	0.7	0.974699	-1.55762	-1.54383	0.0137924	0	1.00961	CNAG_01373		Septin ring protein	cytoskeleton-dependent cytokinesis [GO:0061640]	cell division site [GO:0032153]; microtubule cytoskeleton [GO:0015630]; septin complex [GO:0031105]; septin ring [GO:0005940]	GTP binding [GO:0005525]; GTPase activity [GO:0003924]; molecular adaptor activity [GO:0060090]
J9VTB4	WT:uggt	TRUE	0.2	0.21347	0.507125	0.737056	0.229931	0	1.17278	CNAG_01491		Uncharacterized protein	positive regulation of JNK cascade [GO:0046330]; protein targeting to chloroplast [GO:0045036]	cytoplasm [GO:0005737]; nucleus [GO:0005634]	chloroplast targeting sequence binding [GO:0030941]
J9VKJ7	WT:uggt	TRUE	0.7	0.946132	1.91278	1.92459	0.0118116	0	1.00822	CNAG_02751		Short-chain dehydrogenase			oxidoreductase activity [GO:0016491]
J9VSZ8	WT:uggt	TRUE	0.7	0.294782	0.681159	1.04551	0.364354	0	1.28731	CNAG_07857		WW domain-containing protein
J9VZY2	WT:uggt	TRUE	0.2	0.0721452	-3.02916	-3.94019	-0.911025	0	0.531807	CNAG_05584	MDE1	Methylthioribulose-1-phosphate dehydratase (MTRu-1-P dehydratase) (EC 4.2.1.109)	L-methionine salvage from methylthioadenosine [GO:0019509]; L-methionine salvage from S-adenosylmethionine [GO:0019284]	cytoplasm [GO:0005737]	methylthioribulose 1-phosphate dehydratase activity [GO:0046570]; zinc ion binding [GO:0008270]
J9VFW9	WT:uggt	TRUE	0.7	0.239158	-1.71559	-1.23644	0.479146	0	1.39392	CNAG_03761		mRNA 3'-end-processing protein RNA14	mRNA 3'-end processing [GO:0031124]	cytoplasm [GO:0005737]; nucleus [GO:0005634]	mRNA binding [GO:0003729]
J9VU24	WT:uggt	TRUE	0.1	0.0493762	0.192354	0.648524	0.45617	0	1.3719	CNAG_01568		T-complex protein 1 subunit alpha (CCT-alpha)		chaperonin-containing T-complex [GO:0005832]	ATP binding [GO:0005524]; ATP hydrolysis activity [GO:0016887]; ATP-dependent protein folding chaperone [GO:0140662]; unfolded protein binding [GO:0051082]
J9VQZ6	WT:uggt	TRUE	0.1	0.088601	0.508075	-0.481071	-0.989146	0	0.503776	CNAG_02563		DNA polymerase (EC 2.7.7.7)	base-excision repair, gap-filling [GO:0006287]; DNA replication proofreading [GO:0045004]; nucleotide-excision repair, DNA gap filling [GO:0006297]	delta DNA polymerase complex [GO:0043625]	3'-5'-DNA exonuclease activity [GO:0008296]; 4 iron, 4 sulfur cluster binding [GO:0051539]; DNA binding [GO:0003677]; DNA-directed DNA polymerase activity [GO:0003887]; metal ion binding [GO:0046872]; nucleotide binding [GO:0000166]
J9VPL3	WT:uggt	TRUE	0.7	0.964574	1.44099	1.46654	0.0255487	0	1.01787	CNAG_05285		DFDF domain-containing protein	P-body assembly [GO:0033962]; stress granule assembly [GO:0034063]	P-body [GO:0000932]	mRNA binding [GO:0003729]
J9VUU3	WT:uggt	TRUE	0.1	0.0214483	-0.116366	0.112843	0.229208	0	1.17219	CNAG_01822		Stress-response A/B barrel domain-containing protein
J9VZ13	WT:uggt	TRUE	0.1	0.0442135	-2.10368	-2.92256	-0.818881	0	0.566881	CNAG_01675		Fructose-bisphosphate aldolase (FBP aldolase) (EC 4.1.2.13)	glycolytic process [GO:0006096]		fructose-bisphosphate aldolase activity [GO:0004332]; zinc ion binding [GO:0008270]
J9VS15	WT:uggt	TRUE	1	0.552639	0.768592	0.578574	-0.190018	0	0.876595	CNAG_05886		Ubiquitin-conjugating enzyme E2	postreplication repair [GO:0006301]; protein K63-linked ubiquitination [GO:0070534]	nucleus [GO:0005634]
J9VZG6	WT:uggt	TRUE	0.7	0.41993	5.38385	5.20397	-0.179877	0	0.882779	CNAG_01854	HEP2	Heparinase II/III family protein		membrane [GO:0016020]	lyase activity [GO:0016829]
J9W0Q9	WT:uggt	TRUE	0.1	0.00218005	0.758229	0.291055	-0.467174	0	0.72338	CNAG_04577		Nucleoside diphosphate kinase (EC 2.7.4.6)	CTP biosynthetic process [GO:0006241]; GTP biosynthetic process [GO:0006183]; UTP biosynthetic process [GO:0006228]		nucleoside diphosphate kinase activity [GO:0004550]
J9VHZ0	WT:uggt	TRUE	0.7	0.804445	-2.20749	-2.06437	0.143115	0	1.10429	CNAG_06799		Uroporphyrinogen decarboxylase (EC 4.1.1.37)	protoporphyrinogen IX biosynthetic process [GO:0006782]	cytosol [GO:0005829]	uroporphyrinogen decarboxylase activity [GO:0004853]
J9VGJ4	WT:uggt	TRUE	0.1	0.0633769	-1.61921	-1.38759	0.231622	0	1.17415	CNAG_00312		Protein transport protein BOS1	endoplasmic reticulum to Golgi vesicle-mediated transport [GO:0006888]; intra-Golgi vesicle-mediated transport [GO:0006891]; protein transport [GO:0015031]; vesicle fusion [GO:0006906]	endoplasmic reticulum membrane [GO:0005789]; ER to Golgi transport vesicle membrane [GO:0012507]; Golgi membrane [GO:0000139]; late endosome membrane [GO:0031902]; SNARE complex [GO:0031201]	SNAP receptor activity [GO:0005484]; SNARE binding [GO:0000149]
J9VMX9	WT:uggt	TRUE	1	0.662591	-4.67592	-4.48923	0.186691	0	1.13815	CNAG_01339		Presequence protease, mitochondrial (Pitrilysin metalloproteinase)	proteolysis [GO:0006508]	mitochondrial intermembrane space [GO:0005758]	metal ion binding [GO:0046872]
J9VUA6	WT:uggt	TRUE	0.1	0.0659604	-1.34375	-0.74066	0.603086	0	1.51896	CNAG_01643		Stress-associated endoplasmic reticulum protein		endoplasmic reticulum membrane [GO:0005789]
J9VG05	WT:uggt	TRUE	0.1	0.0103232	-1.08209	-0.900321	0.181769	0	1.13427	CNAG_06773	SEC24	Protein transporter SEC24	COPII-coated vesicle cargo loading [GO:0090110]; intracellular protein transport [GO:0006886]	COPII vesicle coat [GO:0030127]; endoplasmic reticulum exit site [GO:0070971]; Golgi apparatus [GO:0005794]	SNARE binding [GO:0000149]; zinc ion binding [GO:0008270]
J9VU10	WT:uggt	TRUE	0.1	0.0103207	0.569742	0.121684	-0.448058	0	0.733029	CNAG_01553		CORD and CS domain-containing protein			metal ion binding [GO:0046872]
J9VJM7	WT:uggt	TRUE	0.7	0.355628	-1.40795	-1.58579	-0.177834	0	0.884029	CNAG_06812		Phospholipase (EC 3.1.4.4)	intracellular signal transduction [GO:0035556]; phosphatidic acid biosynthetic process [GO:0006654]; phospholipid catabolic process [GO:0009395]; regulation of vesicle-mediated transport [GO:0060627]	intracellular membrane-bounded organelle [GO:0043231]; plasma membrane [GO:0005886]	N-acylphosphatidylethanolamine-specific phospholipase D activity [GO:0070290]; phosphatidylinositol binding [GO:0035091]; phospholipase D activity [GO:0004630]
J9VSJ1	WT:uggt	TRUE	0.7	0.858607	-1.98835	-2.11314	-0.124794	0	0.917135	CNAG_04823		Peptidyl-prolyl cis-trans isomerase (PPIase) (EC 5.2.1.8)	protein folding [GO:0006457]	cytosol [GO:0005829]; intracellular membrane-bounded organelle [GO:0043231]; plasma membrane [GO:0005886]	peptidyl-prolyl cis-trans isomerase activity [GO:0003755]
J9VQA8	WT:uggt	TRUE	0.1	0.0290925	0.142975	-0.766647	-0.909622	0	0.532325	CNAG_01341		Mannose-6-phosphate isomerase			isomerase activity [GO:0016853]
J9W303	WT:uggt	TRUE	0.1	0.17118	-1.36523	-2.22049	-0.855263	0	0.552764	CNAG_06300		Glutamate--cysteine ligase (EC 6.3.2.2) (Gamma-ECS) (Gamma-glutamylcysteine synthetase)	glutathione biosynthetic process [GO:0006750]	glutamate-cysteine ligase complex [GO:0017109]	ATP binding [GO:0005524]; glutamate-cysteine ligase activity [GO:0004357]
J9VQE6	WT:uggt	TRUE	0.4	0.275776	0.30422	-0.0382681	-0.342488	0	0.78868	CNAG_03237		Uncharacterized protein
J9W1W5	WT:uggt	TRUE	0.7	0.481635	-2.94919	-2.70163	0.247556	0	1.18719	CNAG_01899		Prefoldin alpha subunit	protein folding [GO:0006457]; RNA polymerase I assembly [GO:1990113]; RNA polymerase II core complex assembly [GO:1990114]; RNA polymerase III assembly [GO:1990115]	cytoplasm [GO:0005737]; prefoldin complex [GO:0016272]	unfolded protein binding [GO:0051082]
J9VQQ8	WT:uggt	TRUE	0.1	0.092482	-0.386731	-0.676642	-0.289911	0	0.817952	CNAG_02656		Translation machinery-associated protein 20	formation of translation preinitiation complex [GO:0001731]	cytoplasm [GO:0005737]	RNA binding [GO:0003723]
J9VVT7	WT:uggt	TRUE	0.4	0.292678	2.74083	3.32931	0.588484	0	1.50367	CNAG_06535		Ribosome biogenesis protein UTP30
J9VF71	WT:uggt	TRUE	0.7	0.354816	-2.50633	-2.12661	0.379728	0	1.3011	CNAG_00846		Protein FAF1	maturation of SSU-rRNA from tricistronic rRNA transcript (SSU-rRNA, 5.8S rRNA, LSU-rRNA) [GO:0000462]	nucleolus [GO:0005730]
J9VH18	WT:uggt	TRUE	0.1	0.136861	-0.868486	-1.48965	-0.621167	0	0.650145	CNAG_00539		Membrane transporter		fungal-type vacuole membrane [GO:0000329]	spermine transmembrane transporter activity [GO:0000297]
J9VLW5	WT:uggt	TRUE	0.7	0.471904	-2.22883	-2.34484	-0.116012	0	0.922735	CNAG_05146		DNA-directed RNA polymerase subunit	maintenance of transcriptional fidelity during transcription elongation by RNA polymerase II [GO:0001193]; transcription initiation at RNA polymerase II promoter [GO:0006367]; transcription-coupled nucleotide-excision repair [GO:0006283]	nucleolus [GO:0005730]; RNA polymerase II, core complex [GO:0005665]	DNA-directed 5'-3' RNA polymerase activity [GO:0003899]; nucleic acid binding [GO:0003676]; zinc ion binding [GO:0008270]
J9VKM7	WT:uggt	TRUE	0.7	0.423282	-0.131484	-0.245267	-0.113783	0	0.924162	CNAG_03664		Nickel/cobalt efflux system		plasma membrane [GO:0005886]	nickel cation transmembrane transporter activity [GO:0015099]
J9VLN9	WT:uggt	TRUE	0.1	0.00200451	0.924757	1.81607	0.891313	0	1.85486	CNAG_07362		Nucleolin		nucleus [GO:0005634]	mRNA binding [GO:0003729]
J9VLF8	WT:uggt	TRUE	0.7	0.763968	-2.16352	-2.24499	-0.0814779	0	0.945089	CNAG_01058		Nitric oxide synthase-interacting protein		nucleus [GO:0005634]	ubiquitin protein ligase activity [GO:0061630]
J9VI36	WT:uggt	TRUE	0.1	0.0230931	-1.53425	-0.983435	0.550812	0	1.46491	CNAG_07519		Major facilitator superfamily (MFS) profile domain-containing protein		membrane [GO:0016020]	transmembrane transporter activity [GO:0022857]
J9VUU8	WT:uggt	TRUE	0.2	0.0811637	6.62538	6.37589	-0.249494	0	0.841191	CNAG_02359		40S ribosomal protein S25		cytosolic small ribosomal subunit [GO:0022627]	structural constituent of ribosome [GO:0003735]
J9VEX9	WT:uggt	TRUE	0.1	0.0185355	-0.22806	-0.638403	-0.410343	0	0.752444	CNAG_00502		Large subunit ribosomal protein L35	translation [GO:0006412]	cytosolic large ribosomal subunit [GO:0022625]	structural constituent of ribosome [GO:0003735]
J9VMY0	WT:uggt	TRUE	1	0.681585	-4.89499	-4.70106	0.193932	0	1.14388	CNAG_02763		phenylalanine--tRNA ligase (EC 6.1.1.20)	phenylalanyl-tRNA aminoacylation [GO:0006432]	phenylalanine-tRNA ligase complex [GO:0009328]	ATP binding [GO:0005524]; magnesium ion binding [GO:0000287]; phenylalanine-tRNA ligase activity [GO:0004826]; RNA binding [GO:0003723]
J9VQJ6	WT:uggt	TRUE	0.1	0.0426442	0.737067	-0.204363	-0.94143	0	0.520716	CNAG_02128	HCR1	Eukaryotic translation initiation factor 3 subunit J (eIF3j) (Eukaryotic translation initiation factor 3 30 kDa subunit homolog) (eIF-3 30 kDa subunit homolog)	formation of cytoplasmic translation initiation complex [GO:0001732]	eukaryotic 43S preinitiation complex [GO:0016282]; eukaryotic 48S preinitiation complex [GO:0033290]; eukaryotic translation initiation factor 3 complex [GO:0005852]	translation initiation factor activity [GO:0003743]
J9VUL6	WT:uggt	TRUE	0.2	0.0997137	-2.48841	-1.89691	0.591506	0	1.50682	CNAG_01726		FACT complex subunit	DNA repair [GO:0006281]; DNA replication [GO:0006260]; transcription elongation by RNA polymerase II [GO:0006368]	FACT complex [GO:0035101]	nucleosome binding [GO:0031491]
J9VNY7	WT:uggt	TRUE	0.1	0.00275825	0.0927568	-0.79725	-0.890007	0	0.539612	CNAG_05878		Actin-related protein 2/3 complex subunit	Arp2/3 complex-mediated actin nucleation [GO:0034314]	actin cortical patch [GO:0030479]; Arp2/3 protein complex [GO:0005885]	actin filament binding [GO:0051015]
J9VPK3	WT:uggt	TRUE	0.1	0.129019	-2.89619	-1.57258	1.32361	0	2.50292	CNAG_03064		Nucleolar protein 16	ribosomal large subunit biogenesis [GO:0042273]	nucleolus [GO:0005730]
J9VS82	WT:uggt	TRUE	0.1	0.0334699	-0.992503	-0.632321	0.360181	0	1.28359	CNAG_02382		Ribosome biogenesis protein BRX1	rRNA processing [GO:0006364]	nucleolus [GO:0005730]	rRNA binding [GO:0019843]
J9VLM9	WT:uggt	TRUE	0.1	0.0215576	-0.259385	-1.08366	-0.82428	0	0.564764	CNAG_03984		Rhodanese domain-containing protein		cytoplasm [GO:0005737]; nucleus [GO:0005634]	protein tyrosine phosphatase activity [GO:0004725]
J9VP96	WT:uggt	TRUE	0.1	0.0485816	-2.80812	-1.83507	0.973048	0	1.96298	CNAG_04010		GTP cyclohydrolase 1 (EC 3.5.4.16) (GTP cyclohydrolase I)	folic acid biosynthetic process [GO:0046656]; tetrahydrobiopterin biosynthetic process [GO:0006729]; tetrahydrofolate biosynthetic process [GO:0046654]	cytoplasm [GO:0005737]	GTP binding [GO:0005525]; GTP cyclohydrolase I activity [GO:0003934]; zinc ion binding [GO:0008270]
J9VS22	WT:uggt	TRUE	0.4	0.174782	-3.51992	-2.65731	0.862617	0	1.81833	CNAG_04332		Large ribosomal subunit protein mL60	mitochondrial translation [GO:0032543]	mitochondrial large ribosomal subunit [GO:0005762]	structural constituent of ribosome [GO:0003735]
J9VXB7	WT:uggt	TRUE	0.2	0.0753625	-2.46813	-2.32158	0.146552	0	1.10692	CNAG_06998		Protein transporter SEC61 subunit alpha	post-translational protein targeting to membrane, translocation [GO:0031204]; SRP-dependent cotranslational protein targeting to membrane, translocation [GO:0006616]	Sec61 translocon complex [GO:0005784]	protein transmembrane transporter activity [GO:0008320]; ribosome binding [GO:0043022]; signal sequence binding [GO:0005048]
J9VPU1	WT:uggt	TRUE	0.7	0.154701	1.72419	0.940948	-0.783243	0	0.581059	CNAG_03251		ADP-ribosylation factor	intracellular protein transport [GO:0006886]; vesicle-mediated transport [GO:0016192]	Golgi apparatus [GO:0005794]; plasma membrane [GO:0005886]	GTP binding [GO:0005525]; GTPase activity [GO:0003924]
J9VWI8	WT:uggt	TRUE	0.1	0.00341104	-2.99219	-2.12175	0.870436	0	1.82822	CNAG_01576		mRNA stability protein	negative regulation of protein dephosphorylation [GO:0035308]	cytoplasm [GO:0005737]	protein phosphatase inhibitor activity [GO:0004864]
J9VIV1	WT:uggt	TRUE	0.7	0.350242	-1.26283	-1.51717	-0.254341	0	0.83837	CNAG_03840		Pre-mRNA-splicing factor CWC26	mRNA splicing, via spliceosome [GO:0000398]	RES complex [GO:0070274]; U2-type spliceosomal complex [GO:0005684]	RNA binding [GO:0003723]
J9VRM8	WT:uggt	TRUE	0.4	0.298389	0.991155	1.06368	0.0725276	0	1.05156	CNAG_05105		Eukaryotic translation initiation factor 3 subunit L (eIF3l)	formation of cytoplasmic translation initiation complex [GO:0001732]	eukaryotic 43S preinitiation complex [GO:0016282]; eukaryotic 48S preinitiation complex [GO:0033290]; eukaryotic translation initiation factor 3 complex [GO:0005852]	translation initiation factor activity [GO:0003743]
J9VNI1	WT:uggt	TRUE	0.1	0.0157479	1.61813	1.05559	-0.562539	0	0.677109	CNAG_06908		pyridoxal 5'-phosphate synthase (glutamine hydrolyzing) (EC 4.3.3.6)	amino acid metabolic process [GO:0006520]; pyridoxal phosphate biosynthetic process [GO:0042823]; pyridoxine biosynthetic process [GO:0008615]		pyridoxal 5'-phosphate synthase (glutamine hydrolysing) activity [GO:0036381]
J9VXV1	WT:uggt	TRUE	0.1	0.0493805	-0.4511	-0.984332	-0.533232	0	0.691005	CNAG_04792	PSD2	Phosphatidylserine decarboxylase proenzyme 2 (EC 4.1.1.65) [Cleaved into: Phosphatidylserine decarboxylase 2 beta chain; Phosphatidylserine decarboxylase 2 alpha chain]	phosphatidylethanolamine biosynthetic process [GO:0006646]; protein autoprocessing [GO:0016540]	endosome membrane [GO:0010008]; Golgi membrane [GO:0000139]; Golgi stack [GO:0005795]	calcium ion binding [GO:0005509]; phosphatidylserine decarboxylase activity [GO:0004609]
J9VPM1	WT:uggt	TRUE	0.1	0.00884451	0.266402	-0.599672	-0.866074	0	0.548638	CNAG_03045		Uncharacterized protein	glutathione biosynthetic process [GO:0006750]	glutamate-cysteine ligase complex [GO:0017109]	enzyme regulator activity [GO:0030234]; glutamate-cysteine ligase catalytic subunit binding [GO:0035226]
J9VV10	WT:uggt	TRUE	0.1	0.0525361	-1.31849	-0.35322	0.965265	0	1.95242	CNAG_03182		U4/U6.U5 tri-snRNP-associated protein 3	mRNA processing [GO:0006397]; RNA splicing [GO:0008380]	precatalytic spliceosome [GO:0071011]
J9VFV3	WT:uggt	TRUE	0.1	0.0214652	4.42937	3.67056	-0.758809	0	0.590984	CNAG_03747		Large subunit ribosomal protein L27Ae	translation [GO:0006412]	cytosolic large ribosomal subunit [GO:0022625]	structural constituent of ribosome [GO:0003735]
J9VWS9	WT:uggt	TRUE	0.1	0.135631	-1.4343	-1.1068	0.327495	0	1.25483	CNAG_05457		Pentatricopeptide repeat protein
J9VKP2	WT:uggt	TRUE	0.2	0.0973904	-2.37519	-1.6174	0.757795	0	1.6909	CNAG_00119		Uncharacterized protein
J9VKY1	WT:uggt	TRUE	0.1	0.08698	-2.58026	-1.6894	0.890862	0	1.85428	CNAG_01010		Mitochondrial fission process protein 1 (Mitochondrial 18 kDa protein)	mitochondrial fission [GO:0000266]	mitochondrion [GO:0005739]
J9VHN0	WT:uggt	TRUE	0.7	0.972789	-3.68599	-3.70465	-0.0186555	0	0.987152	CNAG_02785		BD-FAE-like domain-containing protein
J9VMX4	WT:uggt	TRUE	0.1	0.00108946	2.19112	1.39148	-0.799642	0	0.574492	CNAG_01344		Ysc84 actin-binding domain-containing protein			phosphatidylinositol binding [GO:0035091]
J9VLQ3	WT:uggt	TRUE	0.1	0.00581625	0.849365	0.0963972	-0.752968	0	0.593382	CNAG_04014		26S proteasome regulatory subunit N9	ubiquitin-dependent protein catabolic process [GO:0006511]	cytosol [GO:0005829]; nucleus [GO:0005634]; proteasome regulatory particle, lid subcomplex [GO:0008541]	structural molecule activity [GO:0005198]
J9VH91	WT:uggt	TRUE	1	0.86967	-1.38598	-1.47763	-0.0916497	0	0.938449	CNAG_07372		6-phosphofructo-2-kinase/fructose-2, 6-bisphosphatase	fructose 2,6-bisphosphate metabolic process [GO:0006003]; fructose metabolic process [GO:0006000]	cytosol [GO:0005829]	6-phosphofructo-2-kinase activity [GO:0003873]; ATP binding [GO:0005524]; fructose-2,6-bisphosphate 2-phosphatase activity [GO:0004331]
J9VQA6	WT:uggt	TRUE	0.1	0.0454383	-1.55312	-0.970349	0.582769	0	1.49772	CNAG_03186		THO complex subunit 4	mRNA export from nucleus [GO:0006406]	nucleus [GO:0005634]	mRNA binding [GO:0003729]
J9VRH5	WT:uggt	TRUE	0.1	0.0283098	-0.211831	0.0165003	0.228331	0	1.17148	CNAG_04132		Pre-mRNA-splicing factor CWC2	mRNA processing [GO:0006397]; RNA splicing [GO:0008380]	Prp19 complex [GO:0000974]; U2-type catalytic step 1 spliceosome [GO:0071006]; U2-type catalytic step 2 spliceosome [GO:0071007]	metal ion binding [GO:0046872]; pre-mRNA binding [GO:0036002]; U6 snRNA binding [GO:0017070]
J9VXH1	WT:uggt	TRUE	0.1	0.00401033	0.683613	-0.300941	-0.984554	0	0.505382	CNAG_01915		Ribonucleoside-diphosphate reductase subunit M2	deoxyribonucleotide biosynthetic process [GO:0009263]	cytosol [GO:0005829]	ribonucleoside-diphosphate reductase activity, thioredoxin disulfide as acceptor [GO:0004748]
J9VH55	WT:uggt	TRUE	0.2	0.108217	0.0405285	-0.36665	-0.407179	0	0.754097	CNAG_00575		Catalase (EC 1.11.1.6)	hydrogen peroxide catabolic process [GO:0042744]; response to oxidative stress [GO:0006979]	cytosol [GO:0005829]	catalase activity [GO:0004096]; heme binding [GO:0020037]; metal ion binding [GO:0046872]
J9VZE2	WT:uggt	TRUE	0.1	0.00335555	-2.73978	-2.19347	0.546302	0	1.46034	CNAG_04384		peptidyl-tRNA hydrolase (EC 3.1.1.29)	negative regulation of anoikis [GO:2000811]; positive regulation of anoikis [GO:2000210]	cytosol [GO:0005829]; mitochondrion [GO:0005739]	aminoacyl-tRNA hydrolase activity [GO:0004045]
J9VRK8	WT:uggt	TRUE	0.2	0.21859	-1.78404	-2.35208	-0.568038	0	0.674533	CNAG_05085	LIA1	Deoxyhypusine hydroxylase (DOHH) (EC 1.14.99.29) (Deoxyhypusine dioxygenase) (Deoxyhypusine monooxygenase)		cytoplasm [GO:0005737]; nucleus [GO:0005634]	deoxyhypusine monooxygenase activity [GO:0019135]; metal ion binding [GO:0046872]
J9VLN7	WT:uggt	TRUE	0.1	0.0644226	-0.785779	-0.483508	0.302272	0	1.23308	CNAG_05091		Uncharacterized protein	mitochondrial translation [GO:0032543]	mitochondrion [GO:0005739]	structural constituent of ribosome [GO:0003735]
J9VQC7	WT:uggt	TRUE	0.1	0.00459629	0.148216	-0.802057	-0.950274	0	0.517534	CNAG_07719		26S protease regulatory subunit 7	proteasome-mediated ubiquitin-dependent protein catabolic process [GO:0043161]	cytoplasm [GO:0005737]; proteasome regulatory particle, base subcomplex [GO:0008540]	ATP binding [GO:0005524]; ATP hydrolysis activity [GO:0016887]; peptidase activity [GO:0008233]; proteasome-activating activity [GO:0036402]
J9VPP9	WT:uggt	TRUE	1	0.81377	0.300971	0.340362	0.0393903	0	1.02768	CNAG_02458		GTPase activating protein	small GTPase-mediated signal transduction [GO:0007264]	cytoplasm [GO:0005737]; division septum [GO:0000935]; plasma membrane [GO:0005886]	GTPase activator activity [GO:0005096]
J9VIG8	WT:uggt	TRUE	0.1	0.041721	-2.40248	-3	-0.597513	0	0.660892	CNAG_03701		Pentafunctional AROM polypeptide [Includes: 3-dehydroquinate synthase (DHQS) (EC 4.2.3.4); 3-phosphoshikimate 1-carboxyvinyltransferase (EC 2.5.1.19) (5-enolpyruvylshikimate-3-phosphate synthase) (EPSP synthase) (EPSPS); Shikimate kinase (SK) (EC 2.7.1.71); 3-dehydroquinate dehydratase (3-dehydroquinase) (EC 4.2.1.10); Shikimate dehydrogenase (EC 1.1.1.25)]	amino acid biosynthetic process [GO:0008652]; aromatic amino acid family biosynthetic process [GO:0009073]; chorismate biosynthetic process [GO:0009423]	cytoplasm [GO:0005737]	3-dehydroquinate dehydratase activity [GO:0003855]; 3-dehydroquinate synthase activity [GO:0003856]; 3-phosphoshikimate 1-carboxyvinyltransferase activity [GO:0003866]; ATP binding [GO:0005524]; metal ion binding [GO:0046872]; shikimate 3-dehydrogenase (NADP+) activity [GO:0004764]; shikimate kinase activity [GO:0004765]
J9VZF4	WT:uggt	TRUE	0.1	0.032573	0.158016	-0.617536	-0.775552	0	0.584165	CNAG_01839		Peptidyl-prolyl cis-trans isomerase (EC 5.2.1.8)	regulation of macromolecule metabolic process [GO:0060255]; regulation of primary metabolic process [GO:0080090]	cytosol [GO:0005829]; nucleus [GO:0005634]	peptidyl-prolyl cis-trans isomerase activity [GO:0003755]
P0C017	WT:uggt	TRUE	0.1	0.102168	-1.94349	-2.50168	-0.558196	0	0.679151	CNAG_02294	ADE2	Phosphoribosylaminoimidazole carboxylase (EC 4.1.1.21) (AIR carboxylase) (AIRC)	'de novo' IMP biosynthetic process [GO:0006189]		5-amino-4-imidazole carboxylate lyase activity [GO:0043727]; ATP binding [GO:0005524]; metal ion binding [GO:0046872]; phosphoribosylaminoimidazole carboxylase activity [GO:0004638]
J9VKQ6	WT:uggt	TRUE	1	0.654885	-1.74961	-1.70341	0.0462039	0	1.03254	CNAG_01314		Vacuolar protein	nucleotide catabolic process [GO:0009166]	cytosol [GO:0005829]	hydrolase activity [GO:0016787]
J9VJA7	WT:uggt	TRUE	0.2	0.102116	-5.60608	-4.6489	0.957174	0	1.9415	CNAG_05269		Proteasome subunit alpha type	proteasomal protein catabolic process [GO:0010498]; ubiquitin-dependent protein catabolic process [GO:0006511]	cytoplasm [GO:0005737]; nucleus [GO:0005634]; proteasome core complex, alpha-subunit complex [GO:0019773]
J9VP60	WT:uggt	TRUE	0.1	0.0205835	-0.887011	-1.45102	-0.564011	0	0.676419	CNAG_05715		Charged multivesicular body protein 5	late endosome to vacuole transport via multivesicular body sorting pathway [GO:0032511]; vesicle budding from membrane [GO:0006900]	multivesicular body [GO:0005771]
J9W1A3	WT:uggt	TRUE	0.1	0.000759979	3.38645	4.10984	0.723388	0	1.65105	CNAG_05348		Cell division control protein 42 homolog (EC 3.6.5.2)	Cdc42 protein signal transduction [GO:0032488]; cell division [GO:0051301]; endocytosis [GO:0006897]; establishment or maintenance of cell polarity [GO:0007163]; modification of synaptic structure [GO:0099563]; regulation of cellular component organization [GO:0051128]	organelle [GO:0043226]; plasma membrane [GO:0005886]	G protein activity [GO:0003925]; GTP binding [GO:0005525]; protein kinase binding [GO:0019901]
J9VXQ2	WT:uggt	TRUE	0.7	0.590367	-1.51569	-1.61398	-0.0982886	0	0.93414	CNAG_02001		Inositol-polyphosphate 5-phosphatase	phosphatidylinositol dephosphorylation [GO:0046856]	membrane [GO:0016020]	inositol-polyphosphate 5-phosphatase activity [GO:0004445]; phosphatidylinositol-3,4,5-trisphosphate 5-phosphatase activity [GO:0034485]; phosphatidylinositol-4,5-bisphosphate 5-phosphatase activity [GO:0004439]
J9VGF1	WT:uggt	TRUE	0.7	0.85784	1.57295	1.6235	0.0505462	0	1.03566	CNAG_03722		RAN protein binding protein	ribophagy [GO:0034517]	cytosol [GO:0005829]; intracellular organelle [GO:0043229]; ribonucleoprotein complex [GO:1990904]; Ubp3-Bre5 deubiquitination complex [GO:1990861]	mRNA binding [GO:0003729]
J9VM74	WT:uggt	TRUE	0.1	0.0925093	-0.337729	0.486971	0.824699	0	1.77117	CNAG_02486		Translation initiation factor 2 subunit 2	formation of cytoplasmic translation initiation complex [GO:0001732]; formation of translation preinitiation complex [GO:0001731]	eukaryotic translation initiation factor 2 complex [GO:0005850]	mRNA binding [GO:0003729]; translation initiation factor activity [GO:0003743]; translation initiation factor binding [GO:0031369]
J9VP82	WT:uggt	TRUE	1	0.640592	-0.377151	-0.145313	0.231838	0	1.17433	CNAG_03995		FUN14 family protein		membrane [GO:0016020]
J9VX11	WT:uggt	TRUE	0.1	0.196969	-0.893193	-2.142	-1.24881	0	0.420796	CNAG_04444		Splicing factor 3B subunit 1	spliceosomal complex assembly [GO:0000245]	catalytic step 2 spliceosome [GO:0071013]; U12-type spliceosomal complex [GO:0005689]; U2 snRNP [GO:0005686]; U2-type prespliceosome [GO:0071004]	mRNA binding [GO:0003729]
J9VUC7	WT:uggt	TRUE	0.7	0.879872	-0.369452	-0.302251	0.0672007	0	1.04768	CNAG_02507		Eukaryotic translation initiation factor 3 subunit H (eIF3h)	formation of cytoplasmic translation initiation complex [GO:0001732]	eukaryotic 43S preinitiation complex [GO:0016282]; eukaryotic 48S preinitiation complex [GO:0033290]; eukaryotic translation initiation factor 3 complex [GO:0005852]	translation initiation factor activity [GO:0003743]
J9VXQ9	WT:uggt	TRUE	0.2	0.152667	0.907962	0.855934	-0.0520273	0	0.96458	CNAG_05623		Chorismate synthase (EC 4.2.3.5)	amino acid biosynthetic process [GO:0008652]; aromatic amino acid family biosynthetic process [GO:0009073]; chorismate biosynthetic process [GO:0009423]	cytosol [GO:0005829]	chorismate synthase activity [GO:0004107]; FMN binding [GO:0010181]
J9VEQ6	WT:uggt	TRUE	0.1	0.0171109	-0.262983	0.270568	0.533551	0	1.44749	CNAG_00400		Secondary thiamine-phosphate synthase enzyme
J9VIY4	WT:uggt	TRUE	0.1	0.0355171	0.958381	1.20356	0.245174	0	1.18524	CNAG_05117		Oxysterol-binding protein		cytosol [GO:0005829]; intracellular membrane-bounded organelle [GO:0043231]; membrane [GO:0016020]	sterol binding [GO:0032934]
J9W3B1	WT:uggt	TRUE	0.1	0.0187468	-1.81238	-1.32193	0.490448	0	1.40488	CNAG_06436		Uncharacterized protein		membrane [GO:0016020]
J9VVD4	WT:uggt	TRUE	0.1	0.000176279	1.17613	0.598861	-0.57727	0	0.670231	CNAG_06170		S-formylglutathione hydrolase (EC 3.1.2.12)	formaldehyde catabolic process [GO:0046294]	cytosol [GO:0005829]	carboxylic ester hydrolase activity [GO:0052689]; S-formylglutathione hydrolase activity [GO:0018738]
J9VK54	WT:uggt	TRUE	0.1	0.0514825	-1.87807	-4.09088	-2.21281	0	0.215714	CNAG_02870		Folylpolyglutamate synthase (EC 6.3.2.17) (Folylpoly-gamma-glutamate synthetase) (Tetrahydrofolylpolyglutamate synthase)	one-carbon metabolic process [GO:0006730]	cytosol [GO:0005829]; mitochondrial inner membrane [GO:0005743]; mitochondrial matrix [GO:0005759]	ATP binding [GO:0005524]; metal ion binding [GO:0046872]; tetrahydrofolylpolyglutamate synthase activity [GO:0004326]
J9VQF7	WT:uggt	TRUE	0.7	0.961428	-0.966013	-0.953996	0.0120171	0	1.00836	CNAG_02782		Cytoplasmic protein			protein-lysine N-methyltransferase activity [GO:0016279]
J9VWY1	WT:uggt	TRUE	0.7	0.483789	-2.88035	-2.66406	0.216288	0	1.16174	CNAG_07033		Elongator complex protein 5	tRNA wobble uridine modification [GO:0002098]	elongator holoenzyme complex [GO:0033588]
J9VDS3	WT:uggt	TRUE	1	0.901042	-1.28762	-1.32885	-0.041222	0	0.971831	CNAG_00288		Oligoribonuclease		mitochondrion [GO:0005739]	3'-5'-RNA exonuclease activity [GO:0000175]; nucleic acid binding [GO:0003676]
J9VK90	WT:uggt	TRUE	0.4	0.393004	-3.52896	-3.69253	-0.163573	0	0.892811	CNAG_06785		Kynurenine 3-monooxygenase		membrane [GO:0016020]	FAD binding [GO:0071949]; monooxygenase activity [GO:0004497]
J9VWG7	WT:uggt	TRUE	0.1	0.0295501	-3.18667	-2.54262	0.644051	0	1.56271	CNAG_04197		CMGC/DYRK/YAK protein kinase		cytoplasm [GO:0005737]; nucleus [GO:0005634]	ATP binding [GO:0005524]; protein serine/threonine kinase activity [GO:0004674]; protein tyrosine kinase activity [GO:0004713]
J9VW09	WT:uggt	TRUE	0.7	0.293371	-2.82753	-2.40495	0.422578	0	1.34032	CNAG_04613		ATP-binding cassette, subfamily F, member 3			ATP binding [GO:0005524]; ATP hydrolysis activity [GO:0016887]
J9VD88	WT:uggt	TRUE	0.1	0.00284288	2.99529	2.25669	-0.738598	0	0.599321	CNAG_00116		40S ribosomal protein S3	positive regulation of apoptotic signaling pathway [GO:2001235]; translation [GO:0006412]	cytosolic small ribosomal subunit [GO:0022627]; nucleus [GO:0005634]	RNA binding [GO:0003723]; structural constituent of ribosome [GO:0003735]
J9VIY0	WT:uggt	TRUE	0.7	0.177287	-1.14353	-1.73862	-0.595084	0	0.662006	CNAG_06917	PRX1	Thiol-specific antioxidant protein 3	cell redox homeostasis [GO:0045454]; cellular response to oxidative stress [GO:0034599]	cytosol [GO:0005829]; mitochondrion [GO:0005739]	peroxiredoxin activity [GO:0051920]
J9VKE9	WT:uggt	TRUE	0.1	0.000565778	1.36756	0.855932	-0.511631	0	0.701429	CNAG_01211		Coatomer subunit epsilon	endoplasmic reticulum to Golgi vesicle-mediated transport [GO:0006888]; intra-Golgi vesicle-mediated transport [GO:0006891]; protein transport [GO:0015031]; retrograde vesicle-mediated transport, Golgi to endoplasmic reticulum [GO:0006890]	COPI vesicle coat [GO:0030126]; Golgi membrane [GO:0000139]	structural molecule activity [GO:0005198]
J9VI46	WT:uggt	TRUE	0.1	0.0577474	0.100881	1.49212	1.39124	0	2.62305	CNAG_07521		Uncharacterized protein		membrane [GO:0016020]
J9VJ41	WT:uggt	TRUE	0.7	0.376532	2.24211	1.87114	-0.370968	0	0.773264	CNAG_05187		Gfd2/YDR514C-like C-terminal domain-containing protein		nucleus [GO:0005634]
J9VJD6	WT:uggt	TRUE	0.7	0.671931	-0.470828	-0.349224	0.121604	0	1.08794	CNAG_05074		PLD phosphodiesterase domain-containing protein	cardiolipin biosynthetic process [GO:0032049]	membrane [GO:0016020]	cardiolipin synthase activity [GO:0008808]
J9VRL2	WT:uggt	TRUE	0.1	0.000889734	0.877772	-0.0385556	-0.916327	0	0.529856	CNAG_05090		Quinone oxidoreductase			NADPH binding [GO:0070402]; NADPH:quinone reductase activity [GO:0003960]; quinone binding [GO:0048038]
J9VVG9	WT:uggt	TRUE	0.7	0.593944	-3.92065	-3.78819	0.132457	0	1.09616	CNAG_02104		Phosphatidylinositol transfer protein SFH5 (PITP SFH5)	Golgi to plasma membrane protein transport [GO:0043001]; regulation of exocytosis [GO:0017157]	cortical endoplasmic reticulum [GO:0032541]; cytosol [GO:0005829]; endoplasmic reticulum membrane [GO:0005789]; plasma membrane [GO:0005886]	metal ion binding [GO:0046872]; phosphatidylinositol transfer activity [GO:0008526]
T2BPF0	WT:uggt	TRUE	0.2	0.0863561	-1.38985	-0.957945	0.431903	0	1.34901	CNAG_04205		Bromodomain-containing protein 8, variant		NuA4 histone acetyltransferase complex [GO:0035267]
J9VMC4	WT:uggt	TRUE	0.2	0.0955388	-3.64762	-2.66297	0.984652	0	1.97884	CNAG_02938		Cytochrome c oxidase subunit 6a	mitochondrial electron transport, cytochrome c to oxygen [GO:0006123]	mitochondrial respiratory chain complex IV [GO:0005751]	enzyme regulator activity [GO:0030234]
J9VFH7	WT:uggt	TRUE	0.7	0.245898	-4.47436	-3.3794	1.09496	0	2.13607	CNAG_00718		Chromatin assembly factor 1 subunit B	DNA replication-dependent chromatin assembly [GO:0006335]; nucleosome assembly [GO:0006334]	CAF-1 complex [GO:0033186]; nucleus [GO:0005634]
J9VJU5	WT:uggt	TRUE	0.1	0.010342	1.2236	2.18767	0.964079	0	1.95082	CNAG_01405		Uncharacterized protein		membrane [GO:0016020]
J9VJZ6	WT:uggt	TRUE	0.1	0.0453603	-0.496705	-1.14045	-0.643742	0	0.640051	CNAG_00768		NADH:ubiquinone oxidoreductase intermediate-associated protein 30 domain-containing protein	mitochondrial electron transport, NADH to ubiquinone [GO:0006120]; mitochondrial respiratory chain complex I assembly [GO:0032981]	mitochondrion [GO:0005739]	unfolded protein binding [GO:0051082]
J9VUB1	WT:uggt	TRUE	0.7	0.915999	0.676577	0.657926	-0.0186512	0	0.987155	CNAG_01648 CNAG_07807		Histone H4	nucleosome assembly [GO:0006334]	nucleosome [GO:0000786]; nucleus [GO:0005634]	DNA binding [GO:0003677]; protein heterodimerization activity [GO:0046982]; structural constituent of chromatin [GO:0030527]
J9VEP5	WT:uggt	TRUE	0.7	0.148854	-2.25406	-1.8852	0.368856	0	1.29133	CNAG_00385		Proteasome subunit beta	proteasome-mediated ubiquitin-dependent protein catabolic process [GO:0043161]	cytoplasm [GO:0005737]; nucleus [GO:0005634]; proteasome core complex, beta-subunit complex [GO:0019774]
J9VR10	WT:uggt	TRUE	0.1	0.187469	-1.64777	-2.09435	-0.446573	0	0.733784	CNAG_01102		Oxidoreductase			oxidoreductase activity, acting on CH-OH group of donors [GO:0016614]
J9VK28	WT:uggt	TRUE	0.2	0.119871	0.160558	-0.00529067	-0.165848	0	0.891404	CNAG_00808		Myosin regulatory light chain cdc4	mitotic actomyosin contractile ring assembly [GO:1903475]	myosin II complex [GO:0016460]	calcium ion binding [GO:0005509]; myosin heavy chain binding [GO:0032036]
T2BPC4	WT:uggt	TRUE	0.4	0.354037	-0.986272	-1.432	-0.445728	0	0.734214	CNAG_03436		alanine transaminase (EC 2.6.1.2)	biosynthetic process [GO:0009058]; L-alanine catabolic process [GO:0042853]		L-alanine:2-oxoglutarate aminotransferase activity [GO:0004021]; pyridoxal phosphate binding [GO:0030170]
J9VLG2	WT:uggt	TRUE	0.2	0.14135	-3.26911	-2.81675	0.452365	0	1.36828	CNAG_01054		protein-serine/threonine phosphatase (EC 3.1.3.16)	mRNA processing [GO:0006397]; termination of RNA polymerase II transcription [GO:0006369]	mRNA cleavage and polyadenylation specificity factor complex [GO:0005847]	myosin phosphatase activity [GO:0017018]; RNA polymerase II CTD heptapeptide repeat phosphatase activity [GO:0008420]
J9VXN3	WT:uggt	TRUE	0.1	0.0525568	1.08907	2.47873	1.38966	0	2.62017	CNAG_05590		Uncharacterized protein			histidine phosphotransfer kinase activity [GO:0009927]; phosphorelay sensor kinase activity [GO:0000155]
J9VTB8	WT:uggt	TRUE	1	0.812597	-2.32066	-2.37429	-0.0536281	0	0.96351	CNAG_06578		Uncharacterized protein
J9VQK6	WT:uggt	TRUE	0.2	0.158143	-0.389338	-0.57288	-0.183541	0	0.880539	CNAG_03317		AP-1 complex subunit mu-1	intracellular protein transport [GO:0006886]	clathrin adaptor complex [GO:0030131]; clathrin-coated vesicle [GO:0030136]	clathrin adaptor activity [GO:0035615]
J9VUE0	WT:uggt	TRUE	0.7	0.290823	-0.919908	-1.35618	-0.436276	0	0.73904	CNAG_05909		quinol--cytochrome-c reductase (EC 7.1.1.8)	mitochondrial electron transport, ubiquinol to cytochrome c [GO:0006122]	mitochondrial respiratory chain complex III [GO:0005750]	electron transfer activity [GO:0009055]; heme binding [GO:0020037]; metal ion binding [GO:0046872]
J9W255	WT:uggt	TRUE	1	0.514535	-0.445325	-0.732281	-0.286956	0	0.81963	CNAG_02004		OTU domain-containing protein 6B			cysteine-type deubiquitinase activity [GO:0004843]
J9VNP3	WT:uggt	TRUE	0.4	0.226901	0.175043	0.00897848	-0.166065	0	0.89127	CNAG_03814		Small nuclear ribonucleoprotein Sm D2 (Sm-D2) (snRNP core protein D2)	spliceosomal snRNP assembly [GO:0000387]	catalytic step 2 spliceosome [GO:0071013]; pICln-Sm protein complex [GO:0034715]; precatalytic spliceosome [GO:0071011]; U1 snRNP [GO:0005685]; U2 snRNP [GO:0005686]; U4/U6 x U5 tri-snRNP complex [GO:0046540]; U5 snRNP [GO:0005682]	RNA binding [GO:0003723]
J9VR64	WT:uggt	TRUE	0.1	0.0510819	0.345586	-0.118549	-0.464135	0	0.724905	CNAG_04944		Uncharacterized protein	carbohydrate metabolic process [GO:0005975]
J9VJH9	WT:uggt	TRUE	0.4	0.440751	-2.17506	-2.4826	-0.307546	0	0.808015	CNAG_00641		Transcription elongation factor SPT5	regulation of DNA-templated transcription elongation [GO:0032784]; regulation of transcription by RNA polymerase II [GO:0006357]; transcription elongation by RNA polymerase II [GO:0006368]	DSIF complex [GO:0032044]	mRNA binding [GO:0003729]; translation elongation factor activity [GO:0003746]
J9VXY6	WT:uggt	TRUE	0.4	0.471444	-4.13931	-3.81993	0.319379	0	1.24779	CNAG_04750		Pyridoxamine 5'-phosphate oxidase Alr4036 family FMN-binding domain-containing protein			FMN binding [GO:0010181]
J9VKE8	WT:uggt	TRUE	0.1	0.000483953	1.6835	0.864006	-0.819498	0	0.566639	CNAG_06710		ADF-H domain-containing protein	regulation of actin filament polymerization [GO:0030833]	actin filament [GO:0005884]; cortical actin cytoskeleton [GO:0030864]; site of polarized growth [GO:0030427]	actin filament binding [GO:0051015]
J9VU23	WT:uggt	TRUE	0.7	0.41407	-2.79398	-3.14973	-0.355749	0	0.781464	CNAG_05795		Mitogen-activated protein kinase organizer 1	mRNA splicing, via spliceosome [GO:0000398]	catalytic step 2 spliceosome [GO:0071013]; cytoplasm [GO:0005737]	kinase activity [GO:0016301]
J9VVW1	WT:uggt	TRUE	0.2	0.105355	-0.679714	-1.11102	-0.431303	0	0.741592	CNAG_04677		Xylitol dehydrogenase	sorbitol catabolic process [GO:0006062]		L-iditol 2-dehydrogenase activity [GO:0003939]; zinc ion binding [GO:0008270]
J9VSU4	WT:uggt	TRUE	0.1	0.0783834	-1.75373	-1.0007	0.753028	0	1.68533	CNAG_07424		DNA-directed RNA polymerase I, II, and III subunit RPABC4		RNA polymerase I complex [GO:0005736]; RNA polymerase II, core complex [GO:0005665]; RNA polymerase III complex [GO:0005666]	DNA binding [GO:0003677]; RNA polymerase I activity [GO:0001054]; RNA polymerase II activity [GO:0001055]; RNA polymerase III activity [GO:0001056]; zinc ion binding [GO:0008270]
J9VPC6	WT:uggt	TRUE	0.7	0.247466	-1.83897	-2.18998	-0.351011	0	0.784035	CNAG_05164		Splicing factor 3B subunit 4	positive regulation of mRNA splicing, via spliceosome [GO:0048026]	nucleolus [GO:0005730]; U12-type spliceosomal complex [GO:0005689]; U2 snRNP [GO:0005686]	RNA binding [GO:0003723]
J9W132	WT:uggt	TRUE	0.2	0.0780665	-2.59185	-2.05419	0.537661	0	1.45162	CNAG_01575		ATP-binding cassette transporter		membrane [GO:0016020]	ABC-type transporter activity [GO:0140359]; ATP binding [GO:0005524]; ATP hydrolysis activity [GO:0016887]
J9VMJ6	WT:uggt	TRUE	0.4	0.381443	-0.971919	-0.310846	0.661074	0	1.58126	CNAG_02112		E2 ubiquitin-conjugating enzyme (EC 2.3.2.23)			transferase activity [GO:0016740]
J9VJS0	WT:uggt	TRUE	0.1	0.0153399	-0.836753	-0.298959	0.537794	0	1.45175	CNAG_03016		Chaperone regulator
J9VY78	WT:uggt	TRUE	1	0.68032	0.518837	0.571535	0.052698	0	1.0372	CNAG_03445		Uncharacterized protein
J9VJ74	WT:uggt	TRUE	0.7	0.591229	2.65453	2.74196	0.0874324	0	1.06248	CNAG_03951		Uncharacterized protein
J9VZP9	WT:uggt	TRUE	0.4	0.457788	-0.501526	-0.204026	0.2975	0	1.22901	CNAG_04521		Oxidoreductase		cytoplasm [GO:0005737]; membrane [GO:0016020]	electron-transferring-flavoprotein dehydrogenase activity [GO:0004174]; flavin adenine dinucleotide binding [GO:0050660]
J9VV69	WT:uggt	TRUE	0.7	0.466317	0.119054	-0.325795	-0.444848	0	0.734662	CNAG_06141		Deoxyuridine 5'-triphosphate nucleotidohydrolase (dUTPase) (EC 3.6.1.23) (dUTP pyrophosphatase)	dUMP biosynthetic process [GO:0006226]; dUTP catabolic process [GO:0046081]		dUTP diphosphatase activity [GO:0004170]; magnesium ion binding [GO:0000287]
J9VQ67	WT:uggt	TRUE	0.1	0.0276773	-3.54084	-2.86825	0.672597	0	1.59394	CNAG_03152		Calcium-binding protein	COPII vesicle coating [GO:0048208]	cytoplasm [GO:0005737]	calcium ion binding [GO:0005509]; calcium-dependent protein binding [GO:0048306]
J9VPZ7	WT:uggt	TRUE	0.4	0.132802	4.95966	4.2856	-0.674063	0	0.626739	CNAG_03316		Rho GDP-dissociation inhibitor	Rho protein signal transduction [GO:0007266]	cytosol [GO:0005829]; membrane [GO:0016020]	Rho GDP-dissociation inhibitor activity [GO:0005094]
J9VEJ4	WT:uggt	TRUE	0.1	0.0560485	-0.893337	-1.54029	-0.646955	0	0.638627	CNAG_00294		Splicing factor 45	alternative mRNA splicing, via spliceosome [GO:0000380]; mRNA cis splicing, via spliceosome [GO:0045292]	precatalytic spliceosome [GO:0071011]	nucleic acid binding [GO:0003676]
J9VPU6	WT:uggt	TRUE	0.7	0.615873	-0.98374	-0.71533	0.26841	0	1.20448	CNAG_03261		Zinc finger protein	attachment of spindle microtubules to kinetochore [GO:0008608]; mitotic spindle assembly [GO:0090307]; mitotic spindle assembly checkpoint signaling [GO:0007094]; regulation of DNA-templated transcription [GO:0006355]	kinetochore [GO:0000776]; nucleus [GO:0005634]; spindle matrix [GO:1990047]	DNA binding [GO:0003677]; metal ion binding [GO:0046872]; microtubule binding [GO:0008017]
J9VFH9	WT:uggt	TRUE	0.2	0.146013	-1.13789	-0.464386	0.673505	0	1.59494	CNAG_03603		ATP-dependent RNA helicase (EC 3.6.4.13)	maturation of LSU-rRNA from tricistronic rRNA transcript (SSU-rRNA, 5.8S rRNA, LSU-rRNA) [GO:0000463]	nucleolus [GO:0005730]	ATP binding [GO:0005524]; ATP hydrolysis activity [GO:0016887]; RNA binding [GO:0003723]; RNA helicase activity [GO:0003724]
J9VNG6	WT:uggt	TRUE	0.1	0.0087469	0.357476	1.35256	0.995083	0	1.9932	CNAG_06893		Uncharacterized protein		membrane [GO:0016020]
J9VTD2	WT:uggt	TRUE	0.1	0.0666446	2.16302	1.41781	-0.745207	0	0.596582	CNAG_01183		SH3 domain-containing protein		cytoplasm [GO:0005737]
J9VXF5	WT:uggt	TRUE	0.7	0.289894	-0.636325	-0.783753	-0.147428	0	0.902859	CNAG_05486		Importin N-terminal domain-containing protein	protein import into nucleus [GO:0006606]	cytosol [GO:0005829]; nuclear envelope [GO:0005635]	small GTPase binding [GO:0031267]
J9VMQ3	WT:uggt	TRUE	0.7	0.307341	5.51686	4.99671	-0.520154	0	0.697297	CNAG_00819		40S ribosomal protein S30	translation [GO:0006412]	cytosolic small ribosomal subunit [GO:0022627]	structural constituent of ribosome [GO:0003735]
J9VQA5	WT:uggt	TRUE	0.1	0.0357047	3.13184	3.37727	0.245434	0	1.18545	CNAG_03438		Hexose transporter		plasma membrane [GO:0005886]	carbohydrate:proton symporter activity [GO:0005351]
J9VT91	WT:uggt	TRUE	0.1	0.000118813	-1.30215	-0.73755	0.5646	0	1.47898	CNAG_03412		chitinase (EC 3.2.1.14)	chitin catabolic process [GO:0006032]; polysaccharide catabolic process [GO:0000272]	extracellular region [GO:0005576]	chitin binding [GO:0008061]; chitinase activity [GO:0004568]
J9VYE5	WT:uggt	TRUE	0.4	0.177399	-1.28355	-1.03015	0.253398	0	1.19201	CNAG_03525		Trehalase (EC 3.2.1.28) (Alpha-trehalose glucohydrolase)	trehalose catabolic process [GO:0005993]		alpha,alpha-trehalase activity [GO:0004555]
J9VZ79	WT:uggt	TRUE	0.1	0.00829211	0.444424	1.42519	0.980765	0	1.97351	CNAG_01737		Methylsterol monooxygenase	cholesterol biosynthetic process via lathosterol [GO:0033490]; ergosterol biosynthetic process [GO:0006696]; sphingolipid biosynthetic process [GO:0030148]	endoplasmic reticulum membrane [GO:0005789]	C-4 methylsterol oxidase activity [GO:0000254]; C-5 sterol desaturase activity [GO:0000248]; iron ion binding [GO:0005506]; sphingolipid delta-4 desaturase activity [GO:0042284]; sphingosine hydroxylase activity [GO:0000170]
J9VTY6	WT:uggt	TRUE	0.7	0.504153	-0.0507848	-0.37541	-0.324625	0	0.798506	CNAG_00934		Allantoinase	purine nucleobase catabolic process [GO:0006145]	cytoplasm [GO:0005737]	allantoinase activity [GO:0004038]
J9W060	WT:uggt	TRUE	0.1	0.0478447	1.27455	1.04916	-0.225386	0	0.855366	CNAG_04830		Large ribosomal subunit protein bL33m	translation [GO:0006412]	mitochondrion [GO:0005739]; ribonucleoprotein complex [GO:1990904]; ribosome [GO:0005840]	structural constituent of ribosome [GO:0003735]
J9VGP6	WT:uggt	TRUE	1	0.79251	-3.95302	-3.75369	0.199331	0	1.14817	CNAG_04062		Ribosome biogenesis protein ENP2	maturation of SSU-rRNA from tricistronic rRNA transcript (SSU-rRNA, 5.8S rRNA, LSU-rRNA) [GO:0000462]	90S preribosome [GO:0030686]; nucleolus [GO:0005730]; small-subunit processome [GO:0032040]
J9VM04	WT:uggt	TRUE	0.1	0.0270947	-1.88118	-1.00629	0.874887	0	1.83386	CNAG_02550		Uncharacterized protein
J9VQ34	WT:uggt	TRUE	0.1	0.000752961	2.14094	1.74369	-0.397256	0	0.759301	CNAG_03142		Uncharacterized protein
J9VXD2	WT:uggt	TRUE	1	0.694779	-5.32235	-5.12205	0.200293	0	1.14893	CNAG_05458		Endo-1,3(4)-beta-glucanase	glucan catabolic process [GO:0009251]		hydrolase activity, hydrolyzing O-glycosyl compounds [GO:0004553]
T2BNW0	WT:uggt	TRUE	0.1	1.28292e-05	-0.561526	0.23328	0.794806	0	1.73484	CNAG_08025		Ribonuclease H1 N-terminal domain-containing protein
J9VSB5	WT:uggt	TRUE	0.1	0.00151885	-1.79664	-0.983047	0.813594	0	1.75758	CNAG_04864		Iron regulator 1	negative regulation of transcription by RNA polymerase II [GO:0000122]; positive regulation of transcription by RNA polymerase II [GO:0045944]	nucleus [GO:0005634]	DNA-binding transcription factor activity, RNA polymerase II-specific [GO:0000981]; RNA polymerase II cis-regulatory region sequence-specific DNA binding [GO:0000978]; zinc ion binding [GO:0008270]
J9VP43	WT:uggt	TRUE	0.1	0.217033	-1.8277	-2.33168	-0.503978	0	0.70516	CNAG_03940		Elongator complex protein 2	tRNA wobble uridine modification [GO:0002098]	cytoplasm [GO:0005737]; elongator holoenzyme complex [GO:0033588]; nucleus [GO:0005634]
J9VGS8	WT:uggt	TRUE	0.1	0.0751134	-0.318113	-0.649702	-0.331589	0	0.794661	CNAG_04097		Glucose 1-dehydrogenase			oxidoreductase activity, acting on the CH-OH group of donors, NAD or NADP as acceptor [GO:0016616]
J9VL88	WT:uggt	TRUE	1	0.860133	-1.14814	-1.08531	0.0628249	0	1.04451	CNAG_07347		Heat shock protein	cellular response to heat [GO:0034605]	cytoplasm [GO:0005737]	ATP binding [GO:0005524]; ATP hydrolysis activity [GO:0016887]
J9VI91	WT:uggt	TRUE	0.7	0.68178	-0.845738	-0.900339	-0.0546006	0	0.962861	CNAG_02810		Pumilio-family RNA binding protein	positive regulation of endoplasmic reticulum unfolded protein response [GO:1900103]; post-transcriptional regulation of gene expression [GO:0010608]	P-body [GO:0000932]	mRNA 3'-UTR binding [GO:0003730]; mRNA 5'-UTR binding [GO:0048027]
J9VTC0	WT:uggt	TRUE	0.7	0.368719	-4.75251	-5.16964	-0.417134	0	0.748911	CNAG_01496		Serine/threonine-protein phosphatase (EC 3.1.3.16)			metal ion binding [GO:0046872]; myosin phosphatase activity [GO:0017018]
J9VL50	WT:uggt	TRUE	0.4	0.346876	-0.716608	-0.490852	0.225756	0	1.16939	CNAG_06920		ubiquitinyl hydrolase 1 (EC 3.4.19.12)	DNA damage response, signal transduction by p53 class mediator [GO:0030330]; regulation of autophagy [GO:0010506]	cytosol [GO:0005829]; early endosome [GO:0005769]; nucleus [GO:0005634]	cysteine-type deubiquitinase activity [GO:0004843]
J9W0R4	WT:uggt	TRUE	1	0.389447	1.3862	1.48652	0.100319	0	1.07201	CNAG_07863		26S proteasome regulatory subunit RPN1	proteasome-mediated ubiquitin-dependent protein catabolic process [GO:0043161]; regulation of protein catabolic process [GO:0042176]	nucleus [GO:0005634]; proteasome regulatory particle, base subcomplex [GO:0008540]; proteasome storage granule [GO:0034515]	enzyme regulator activity [GO:0030234]
J9VT85	WT:uggt	TRUE	0.2	0.22145	-3.15047	-2.44076	0.709703	0	1.63547	CNAG_04764		Dihydrofolate reductase (EC 1.5.1.3)	dihydrofolate metabolic process [GO:0046452]; folic acid metabolic process [GO:0046655]; one-carbon metabolic process [GO:0006730]; tetrahydrofolate biosynthetic process [GO:0046654]	cytosol [GO:0005829]; mitochondrion [GO:0005739]	dihydrofolate reductase activity [GO:0004146]; NADP binding [GO:0050661]
J9VJ62	WT:uggt	TRUE	0.7	0.95997	-1.24602	-1.26119	-0.0151705	0	0.98954	CNAG_05222		Transcriptional regulator Nrg1		PcG protein complex [GO:0031519]; transcription regulator complex [GO:0005667]	DNA-binding transcription factor activity, RNA polymerase II-specific [GO:0000981]; metal ion binding [GO:0046872]; RNA polymerase II cis-regulatory region sequence-specific DNA binding [GO:0000978]
J9VNZ0	WT:uggt	TRUE	0.1	0.041987	-3.08394	-2.09945	0.984496	0	1.97862	CNAG_06668		Mitochondrial protein	mitochondrial cytochrome c oxidase assembly [GO:0033617]	mitochondrial respirasome [GO:0005746]
J9VJW9	WT:uggt	TRUE	0.1	0.113681	-3.83279	-2.92382	0.908972	0	1.87771	CNAG_05265		Uncharacterized protein
J9VVG0	WT:uggt	TRUE	0.4	0.12183	0.0927545	0.770503	0.677749	0	1.59964	CNAG_02114		Pali-domain-containing protein		cell division site [GO:0032153]; growing cell tip [GO:0035838]; plasma membrane [GO:0005886]
J9VWJ7	WT:uggt	TRUE	0.1	0.103684	-3.64819	-2.66931	0.978878	0	1.97093	CNAG_05419		Uncharacterized protein
J9VHU7	WT:uggt	TRUE	0.7	0.1991	-0.474884	-1.07626	-0.60138	0	0.659123	CNAG_02914		Large ribosomal subunit protein mL49	translation [GO:0006412]	mitochondrial large ribosomal subunit [GO:0005762]	structural constituent of ribosome [GO:0003735]
J9VL51	WT:uggt	TRUE	0.7	0.406744	-1.22862	-0.863227	0.365394	0	1.28823	CNAG_00916		Transcription factor		nucleus [GO:0005634]; site of double-strand break [GO:0035861]
J9VV76	WT:uggt	TRUE	0.1	0.0548648	-5.14486	-2.80807	2.33679	0	5.05176	CNAG_02210		Ribonuclease Z		membrane [GO:0016020]; nucleus [GO:0005634]	3'-tRNA processing endoribonuclease activity [GO:0042781]
J9VZI6	WT:uggt	TRUE	0.2	0.0856238	0.34671	-0.300263	-0.646973	0	0.638619	CNAG_01878		Myo-inositol 2-dehydrogenase	NADPH regeneration [GO:0006740]	cytoplasm [GO:0005737]	nucleotide binding [GO:0000166]; oxidoreductase activity [GO:0016491]
J9VM57	WT:uggt	TRUE	0.1	0.22529	-1.86651	-2.23552	-0.369015	0	0.774311	CNAG_02269		Autophagy-like protein 18 Atg18	nucleophagy [GO:0044804]; protein localization to phagophore assembly site [GO:0034497]	cytosol [GO:0005829]; extrinsic component of membrane [GO:0019898]; fungal-type vacuole membrane [GO:0000329]; phagophore assembly site membrane [GO:0034045]	phosphatidylinositol-3,5-bisphosphate binding [GO:0080025]; phosphatidylinositol-3-phosphate binding [GO:0032266]
O42773	WT:uggt	TRUE	0.7	0.425929	-0.160067	-0.00765873	0.152408	0	1.11142	CNAG_04796	CNA1	Serine/threonine-protein phosphatase 2B catalytic subunit A1 (EC 3.1.3.16) (Calcineurin A1)	calcineurin-mediated signaling [GO:0097720]; cellular response to calcium ion [GO:0071277]; fungal-type cell wall organization [GO:0031505]; intracellular signal transduction [GO:0035556]; negative regulation of calcium ion import across plasma membrane [GO:1905949]; positive regulation of mitotic actomyosin contractile ring contraction [GO:1903473]; positive regulation of mitotic division septum…	calcineurin complex [GO:0005955]; mitotic actomyosin contractile ring, intermediate layer [GO:0120105]	calmodulin binding [GO:0005516]; calmodulin-dependent protein phosphatase activity [GO:0033192]; ferric iron binding [GO:0008199]; myosin phosphatase activity [GO:0017018]; zinc ion binding [GO:0008270]
J9VSN7	WT:uggt	TRUE	1	0.782359	-2.3984	-2.49364	-0.09524	0	0.936117	CNAG_04770		Nucleolar essential protein 1	rRNA base methylation [GO:0070475]	nucleolus [GO:0005730]; small-subunit processome [GO:0032040]	rRNA (pseudouridine) methyltransferase activity [GO:0070037]; rRNA binding [GO:0019843]
J9VVM1	WT:uggt	TRUE	0.1	0.075386	-1.14591	-0.5737	0.572206	0	1.4868	CNAG_03439	TOM20	Mitochondrial import receptor subunit TOM20	intracellular protein transport [GO:0006886]; protein import into mitochondrial matrix [GO:0030150]; tRNA import into mitochondrion [GO:0016031]	mitochondrial outer membrane translocase complex [GO:0005742]	mitochondrion targeting sequence binding [GO:0030943]; protein transmembrane transporter activity [GO:0008320]
J9VN87	WT:uggt	TRUE	0.1	0.0831045	-0.974518	-0.192693	0.781825	0	1.7193	CNAG_02090		Guanine nucleotide-binding protein G(O) subunit alpha	G protein-coupled receptor signaling pathway [GO:0007186]; pheromone-dependent signal transduction involved in conjugation with cellular fusion [GO:0000750]; Rho protein signal transduction [GO:0007266]	heterotrimeric G-protein complex [GO:0005834]	G protein-coupled receptor binding [GO:0001664]; G-protein beta/gamma-subunit complex binding [GO:0031683]; GTP binding [GO:0005525]; GTPase activity [GO:0003924]
J9VM51	WT:uggt	TRUE	0.1	0.0453931	0.919096	0.295293	-0.623804	0	0.648958	CNAG_05246		ADF-H domain-containing protein	actin filament debranching [GO:0071846]; negative regulation of Arp2/3 complex-mediated actin nucleation [GO:0034316]	actin cortical patch [GO:0030479]; nucleus [GO:0005634]	actin binding [GO:0003779]; Arp2/3 complex binding [GO:0071933]
J9VZ91	WT:uggt	TRUE	0.1	0.0296488	-2.40471	-1.45951	0.945197	0	1.92545	CNAG_01752		Solute carrier family 25 (Mitochondrial 2-oxodicarboxylate transporter), member 21	transmembrane transport [GO:0055085]	membrane [GO:0016020]; mitochondrion [GO:0005739]
J9VH39	WT:uggt	TRUE	0.1	0.0101756	0.922405	0.513045	-0.40936	0	0.752957	CNAG_00560		V-type H-transporting ATPase subunit E		proton-transporting two-sector ATPase complex, catalytic domain [GO:0033178]	proton-transporting ATPase activity, rotational mechanism [GO:0046961]
J9VS50	WT:uggt	TRUE	1	0.709835	0.0272946	-0.0294879	-0.0567825	0	0.961406	CNAG_05921		Diacylglycerol O-acyltransferase (EC 2.3.1.20)	glycerol metabolic process [GO:0006071]; triglyceride biosynthetic process [GO:0019432]	endoplasmic reticulum membrane [GO:0005789]	diacylglycerol O-acyltransferase activity [GO:0004144]
T2BP70	WT:uggt	TRUE	0.1	0.0185092	-1.1497	-0.410549	0.739155	0	1.6692	CNAG_05753		N-acetyl-gamma-glutamyl-phosphate reductase, variant	arginine biosynthetic process [GO:0006526]; glutamate metabolic process [GO:0006536]	mitochondrial matrix [GO:0005759]	acetyl-CoA:L-glutamate N-acetyltransferase activity [GO:0004042]; acetylglutamate kinase activity [GO:0003991]; N-acetyl-gamma-glutamyl-phosphate reductase activity [GO:0003942]; NAD binding [GO:0051287]
J9VXW4	WT:uggt	TRUE	0.4	0.206023	0.421175	-0.1739	-0.595075	0	0.66201	CNAG_03324		Suppressor of action mutation 2-like protein	endocytic recycling [GO:0032456]; Golgi to vacuole transport [GO:0006896]; protein transport [GO:0015031]; retrograde transport, endosome to Golgi [GO:0042147]	cytosol [GO:0005829]; GARP complex [GO:0000938]	syntaxin binding [GO:0019905]
J9VNA9	WT:uggt	TRUE	0.1	0.171314	-0.237989	-0.826234	-0.588245	0	0.665152	CNAG_03685		RNI-like protein	cell migration [GO:0016477]; regulation of Arp2/3 complex-mediated actin nucleation [GO:0034315]	plasma membrane [GO:0005886]
J9VQ08	WT:uggt	TRUE	0.7	0.686473	-3.39864	-3.09305	0.30559	0	1.23592	CNAG_01444		DNA-directed RNA polymerase II subunit RPB4	transcription initiation at RNA polymerase II promoter [GO:0006367]	RNA polymerase II, core complex [GO:0005665]	nucleotide binding [GO:0000166]; translation initiation factor binding [GO:0031369]
J9VKV6	WT:uggt	TRUE	0.1	0.000789028	0.72186	-0.185297	-0.907157	0	0.533235	CNAG_01040		Carboxypeptidase (EC 3.4.16.-)	proteolysis [GO:0006508]		serine-type carboxypeptidase activity [GO:0004185]
J9VSF2	WT:uggt	TRUE	0.1	0.0348854	-3.21789	-2.52941	0.688478	0	1.61158	CNAG_06837		PH domain-containing protein		cytoplasm [GO:0005737]
J9VK88	WT:uggt	TRUE	0.7	0.521027	-2.89567	-3.0102	-0.114528	0	0.923684	CNAG_07517		Uncharacterized protein
J9VTF3	WT:uggt	TRUE	0.7	0.451981	-0.248071	-0.0178121	0.230259	0	1.17305	CNAG_01155		glycerol kinase (EC 2.7.1.30) (ATP:glycerol 3-phosphotransferase)	glycerol catabolic process [GO:0019563]; glycerol-3-phosphate biosynthetic process [GO:0046167]; triglyceride metabolic process [GO:0006641]	cytosol [GO:0005829]; mitochondrion [GO:0005739]	glycerol kinase activity [GO:0004370]
T2BQ06	WT:uggt	TRUE	0.7	0.259769	0.537344	0.792244	0.2549	0	1.19325	CNAG_06450		UBA domain-containing protein
J9VSG8	WT:uggt	TRUE	0.1	0.0557587	-2.55644	-3.80869	-1.25226	0	0.419791	CNAG_07712		NAD-dependent protein deacetylase (EC 2.3.1.286)		mitochondrion [GO:0005739]; nucleus [GO:0005634]	NAD+ binding [GO:0070403]; NAD-dependent histone deacetylase activity [GO:0017136]; transferase activity [GO:0016740]; zinc ion binding [GO:0008270]
J9VVE1	WT:uggt	TRUE	0.1	0.0016481	-0.636165	-1.54748	-0.911314	0	0.531701	CNAG_06180		NADH dehydrogenase [ubiquinone] iron-sulfur protein 4, mitochondrial	electron transport chain [GO:0022900]	mitochondrial respiratory chain complex I [GO:0005747]
J9VQG1	WT:uggt	TRUE	0.1	0.00391738	1.45691	2.2434	0.786482	0	1.72486	CNAG_03492		Uncharacterized protein
J9VQX0	WT:uggt	TRUE	0.1	0.00646876	-1.11052	-1.98863	-0.878109	0	0.54408	CNAG_01151		Ubiquitin-conjugating enzyme E2 D/E			ATP binding [GO:0005524]; transferase activity [GO:0016740]
J9VK27	WT:uggt	TRUE	1	0.858436	-2.70773	-2.62593	0.0817953	0	1.05833	CNAG_01320		Large subunit ribosomal protein L17	translation [GO:0006412]	cytosolic large ribosomal subunit [GO:0022625]; mitochondrial large ribosomal subunit [GO:0005762]	structural constituent of ribosome [GO:0003735]
J9VVH9	WT:uggt	TRUE	0.1	0.00116061	-1.12346	-0.455148	0.668308	0	1.58921	CNAG_06229		Uncharacterized protein	defense response to fungus [GO:0050832]	cytoplasm [GO:0005737]; nucleus [GO:0005634]	protein-folding chaperone binding [GO:0051087]
J9VKS8	WT:uggt	TRUE	0.4	0.198791	-1.49357	-1.67151	-0.17794	0	0.883964	CNAG_01294		Inositol-pentakisphosphate 2-kinase (EC 2.7.1.158)	inositol phosphate biosynthetic process [GO:0032958]	nucleus [GO:0005634]	ATP binding [GO:0005524]; inositol pentakisphosphate 2-kinase activity [GO:0035299]
J9VMV2	WT:uggt	TRUE	0.7	0.202402	0.711022	0.124995	-0.586027	0	0.666175	CNAG_02240		Cytoplasmic protein		cytoplasm [GO:0005737]; nucleus [GO:0005634]
J9VU60	WT:uggt	TRUE	0.1	0.0133442	0.0163822	-0.558088	-0.57447	0	0.671533	CNAG_01769		Solute carrier family 25 (Mitochondrial aspartate/glutamate transporter), member 12/13	malate-aspartate shuttle [GO:0043490]	mitochondrial inner membrane [GO:0005743]	calcium ion binding [GO:0005509]; L-aspartate transmembrane transporter activity [GO:0015183]; L-glutamate transmembrane transporter activity [GO:0005313]
J9VU01	WT:uggt	TRUE	0.7	0.270959	0.177028	0.724573	0.547545	0	1.4616	CNAG_05769		Cytoplasmic protein
J9VRT4	WT:uggt	TRUE	0.1	0.0457414	-2.02063	-2.66825	-0.647615	0	0.638335	CNAG_02498		Lethal giant larvae (Lgl)-like C-terminal domain-containing protein	establishment of cell polarity [GO:0030010]; exocytosis [GO:0006887]; regulation of exocytosis [GO:0017157]; regulation of protein secretion [GO:0050708]	plasma membrane [GO:0005886]; SNARE complex [GO:0031201]	GTPase activator activity [GO:0005096]; myosin II binding [GO:0045159]; syntaxin binding [GO:0019905]
J9W323	WT:uggt	TRUE	0.1	0.0548673	0.262299	0.792026	0.529727	0	1.44366	CNAG_06327		DNA-binding protein creA	carbon catabolite repression of transcription from RNA polymerase II promoter by glucose [GO:0000433]	cytoplasm [GO:0005737]; nucleus [GO:0005634]	RNA polymerase II cis-regulatory region sequence-specific DNA binding [GO:0000978]
J9VG36	WT:uggt	TRUE	0.1	0.0480457	-2.92688	-2.30046	0.626418	0	1.54373	CNAG_07315		Integrin alpha N-terminal domain-containing protein		plasma membrane [GO:0005886]
J9W2F6	WT:uggt	TRUE	0.4	0.184894	1.41587	1.88862	0.472758	0	1.38776	CNAG_06081		Glucose oxidase		membrane [GO:0016020]	flavin adenine dinucleotide binding [GO:0050660]; oxidoreductase activity, acting on CH-OH group of donors [GO:0016614]
J9VKK6	WT:uggt	TRUE	0.1	0.000113542	-0.472357	0.0123845	0.484741	0	1.39933	CNAG_00088		Prohibitin	mitochondrion organization [GO:0007005]	mitochondrial inner membrane [GO:0005743]
J9VKE1	WT:uggt	TRUE	0.1	0.0753093	0.519791	0.664084	0.144293	0	1.10519	CNAG_01222		SAP domain-containing protein
J9VVM8	WT:uggt	TRUE	0.7	0.422011	-1.5072	-1.8237	-0.316495	0	0.803018	CNAG_06093		Protein transporter SEC24	COPII-coated vesicle cargo loading [GO:0090110]; intracellular protein transport [GO:0006886]	COPII vesicle coat [GO:0030127]; endoplasmic reticulum exit site [GO:0070971]	SNARE binding [GO:0000149]; zinc ion binding [GO:0008270]
J9VUQ3	WT:uggt	TRUE	1	0.796852	-1.29899	-1.23051	0.0684778	0	1.04861	CNAG_01770		MRS7 family protein		mitochondrial inner membrane [GO:0005743]	ribosome binding [GO:0043022]
J9VP30	WT:uggt	TRUE	0.7	0.191744	0.197038	0.556595	0.359558	0	1.28303	CNAG_07667		non-specific serine/threonine protein kinase (EC 2.7.11.1)	DNA damage response [GO:0006974]; intracellular signal transduction [GO:0035556]	cytoplasm [GO:0005737]; nucleus [GO:0005634]	ATP binding [GO:0005524]; protein serine/threonine kinase activity [GO:0004674]
J9VH01	WT:uggt	TRUE	0.1	0.0692556	-2.84754	-3.20261	-0.355069	0	0.781832	CNAG_00520		CCHC-type domain-containing protein		P-body [GO:0000932]	nucleic acid binding [GO:0003676]; zinc ion binding [GO:0008270]
J9VPX0	WT:uggt	TRUE	0.7	0.597592	-3.9205	-4.24175	-0.321248	0	0.800377	CNAG_03084		Endoribonuclease L-PSP		cytosol [GO:0005829]; mitochondrion [GO:0005739]	deaminase activity [GO:0019239]
J9VW57	WT:uggt	TRUE	0.7	0.292025	2.1387	1.41547	-0.723231	0	0.605739	CNAG_04566		Beta-flanking protein
J9VFZ1	WT:uggt	TRUE	0.1	0.0703359	-4.11089	-3.42348	0.687415	0	1.61039	CNAG_06792		Protein-vacuolar targeting-related protein	late endosome to vacuole transport via multivesicular body sorting pathway [GO:0032511]; protein targeting to vacuole [GO:0006623]	fungal-type vacuole membrane [GO:0000329]; Vps55/Vps68 complex [GO:0034424]
J9VTR7	WT:uggt	TRUE	0.1	0.00154231	-0.784835	-1.5193	-0.734469	0	0.601039	CNAG_04565		PUB domain-containing protein		cytoplasm [GO:0005737]
J9VJI7	WT:uggt	TRUE	0.4	0.346324	-4.34975	-3.51407	0.835676	0	1.78469	CNAG_00650		GRAM domain-containing protein	intracellular sterol transport [GO:0032366]	cortical endoplasmic reticulum [GO:0032541]; endoplasmic reticulum membrane [GO:0005789]; endoplasmic reticulum-plasma membrane contact site [GO:0140268]; mitochondrion [GO:0005739]; plasma membrane [GO:0005886]
J9VV93	WT:uggt	TRUE	0.4	0.162948	-1.42832	-1.99658	-0.568265	0	0.674427	CNAG_03289		Methionine aminopeptidase 2 (MAP 2) (MetAP 2) (EC 3.4.11.18) (Peptidase M)	proteolysis [GO:0006508]	cytoplasm [GO:0005737]	initiator methionyl aminopeptidase activity [GO:0004239]; metal ion binding [GO:0046872]; metalloaminopeptidase activity [GO:0070006]
J9VS21	WT:uggt	TRUE	0.1	0.0576239	-0.00233856	0.389824	0.392163	0	1.31236	CNAG_05240		Signal recognition particle subunit SRP68 (SRP68)	SRP-dependent cotranslational protein targeting to membrane [GO:0006614]	nucleolus [GO:0005730]; signal recognition particle, endoplasmic reticulum targeting [GO:0005786]	7S RNA binding [GO:0008312]; endoplasmic reticulum signal peptide binding [GO:0030942]; signal recognition particle binding [GO:0005047]
J9VE70	WT:uggt	TRUE	0.7	0.223369	-2.28668	-1.26278	1.0239	0	2.03341	CNAG_00475		WSC domain-containing protein
J9W075	WT:uggt	TRUE	0.7	0.625864	0.114523	0.172847	0.0583247	0	1.04126	CNAG_06138		NADH dehydrogenase (Ubiquinone) Fe-S protein 6	mitochondrial electron transport, NADH to ubiquinone [GO:0006120]	mitochondrial respiratory chain complex I [GO:0005747]
J9VF33	WT:uggt	TRUE	0.1	0.0106412	-0.865562	-0.250819	0.614744	0	1.53129	CNAG_00796	MDR1	ABC multidrug transporter MDR1		plasma membrane [GO:0005886]	ABC-type transporter activity [GO:0140359]; ATP binding [GO:0005524]; ATP hydrolysis activity [GO:0016887]
J9VNR3	WT:uggt	TRUE	0.1	0.0238928	-0.782196	-1.49856	-0.716362	0	0.60863	CNAG_04984		Pleiotropic drug resistance protein			phosphatidylinositol transfer activity [GO:0008526]
J9VRB1	WT:uggt	TRUE	0.1	0.000727971	-1.33735	-1.8911	-0.553758	0	0.681243	CNAG_00988		Importin subunit beta-1	protein import into nucleus [GO:0006606]	cytoplasm [GO:0005737]; nucleus [GO:0005634]	nuclear import signal receptor activity [GO:0061608]; nuclear localization sequence binding [GO:0008139]; small GTPase binding [GO:0031267]
J9VL98	WT:uggt	TRUE	0.7	0.227608	-0.783137	-1.60369	-0.820551	0	0.566226	CNAG_04955		Oxidoreductase			NAD binding [GO:0051287]; oxidoreductase activity [GO:0016491]
T2BMI5	WT:uggt	TRUE	0.1	0.00159051	1.56868	0.615633	-0.95305	0	0.516539	CNAG_02503		Glutathione peroxidase	cellular response to oxidative stress [GO:0034599]	cytosol [GO:0005829]; mitochondrion [GO:0005739]; nucleus [GO:0005634]	glutathione peroxidase activity [GO:0004602]; phospholipid-hydroperoxide glutathione peroxidase activity [GO:0047066]; thioredoxin-dependent peroxiredoxin activity [GO:0140824]
J9VF41	WT:uggt	TRUE	0.1	0.0122628	3.24296	2.81814	-0.424821	0	0.744931	CNAG_00806		ATPase inhibitor, mitochondrial		mitochondrion [GO:0005739]	ATPase inhibitor activity [GO:0042030]
J9VJV3	WT:uggt	TRUE	1	0.520782	-2.01919	-1.88103	0.138157	0	1.1005	CNAG_05248		AP complex subunit beta	intracellular protein transport [GO:0006886]; vesicle-mediated transport [GO:0016192]	membrane coat [GO:0030117]	clathrin binding [GO:0030276]
J9VW66	WT:uggt	TRUE	0.1	0.0396689	-0.238113	-0.586134	-0.348021	0	0.785661	CNAG_06635		General negative regulator of transcription subunit	nuclear-transcribed mRNA poly(A) tail shortening [GO:0000289]; regulation of DNA-templated transcription [GO:0006355]	CCR4-NOT core complex [GO:0030015]; nucleus [GO:0005634]; P-body [GO:0000932]
J9VHT8	WT:uggt	TRUE	0.2	0.152155	1.23564	1.05136	-0.184276	0	0.880091	CNAG_00046		26S proteasome regulatory subunit N8	proteasome-mediated ubiquitin-dependent protein catabolic process [GO:0043161]	proteasome regulatory particle [GO:0005838]	metallopeptidase activity [GO:0008237]
J9VNP9	WT:uggt	TRUE	0.1	0.0691793	2.20349	2.54553	0.34204	0	1.26755	CNAG_03819		Sterol 24-C-methyltransferase	ergosterol biosynthetic process [GO:0006696]; methylation [GO:0032259]	endoplasmic reticulum [GO:0005783]	sterol 24-C-methyltransferase activity [GO:0003838]
J9VWG1	WT:uggt	TRUE	0.4	0.362638	-2.04363	-2.48309	-0.439456	0	0.737413	CNAG_06355		CoA-binding domain-containing protein
J9VXM8	WT:uggt	TRUE	0.7	0.560975	-1.28956	-1.39942	-0.109857	0	0.92668	CNAG_03215		Major facilitator superfamily (MFS) profile domain-containing protein		membrane [GO:0016020]	transmembrane transporter activity [GO:0022857]
J9VM98	WT:uggt	TRUE	0.1	0.00331592	-2.73057	-1.9218	0.808773	0	1.75172	CNAG_00686		Mitochondrial outer membrane protein OM14 C-terminal domain-containing protein		membrane [GO:0016020]
J9VSK0	WT:uggt	TRUE	0.1	0.0319391	4.78897	5.50225	0.713276	0	1.63952	CNAG_02226		Peptidase M20 domain-containing protein 2	folic acid catabolic process [GO:0046657]	cytoplasm [GO:0005737]	dipeptidase activity [GO:0016805]; para-aminobenzoyl-glutamate hydrolase activity [GO:0071713]
J9VR41	WT:uggt	TRUE	0.7	0.877494	-0.474223	-0.450876	0.0233475	0	1.01631	CNAG_06928		PH domain-containing protein
J9VR63	WT:uggt	TRUE	0.7	0.151305	-2.69781	-2.11032	0.587484	0	1.50262	CNAG_06591		SET domain-containing protein	regulation of DNA-templated transcription [GO:0006355]	Rpd3L-Expanded complex [GO:0070210]; Set3 complex [GO:0034967]	metal ion binding [GO:0046872]; methylated histone binding [GO:0035064]
J9VLN5	WT:uggt	TRUE	0.1	0.134838	-0.263766	0.482546	0.746312	0	1.6775	CNAG_00473		Dolichyl-diphosphooligosaccharide--protein glycosyltransferase subunit OST2 (Oligosaccharyl transferase subunit OST2)	protein N-linked glycosylation [GO:0006487]	oligosaccharyltransferase complex [GO:0008250]	transferase activity [GO:0016740]
J9VSM0	WT:uggt	TRUE	0.2	0.0764409	-4.33193	-3.31451	1.01742	0	2.02429	CNAG_03155		ENTH domain-containing protein	clathrin coat assembly [GO:0048268]; clathrin-dependent endocytosis [GO:0072583]	clathrin-coated pit [GO:0005905]; clathrin-coated vesicle [GO:0030136]	1-phosphatidylinositol binding [GO:0005545]; clathrin heavy chain binding [GO:0032050]; phosphatidylinositol-4,5-bisphosphate binding [GO:0005546]; SNARE binding [GO:0000149]
J9VUX7	WT:uggt	TRUE	0.7	0.494968	-3.85856	-3.02776	0.830802	0	1.77867	CNAG_01867		Mitochondrial division protein 1		Set1C/COMPASS complex [GO:0048188]	histone binding [GO:0042393]
J9VD54	WT:uggt	TRUE	0.1	0.0016375	2.32409	1.79732	-0.526763	0	0.69411	CNAG_00075		CsbD-like domain-containing protein
J9VVR7	WT:uggt	TRUE	0.1	0.150591	0.300248	0.735347	0.435099	0	1.352	CNAG_06315		Protein CWC15	mRNA cis splicing, via spliceosome [GO:0045292]	catalytic step 2 spliceosome [GO:0071013]	RNA binding [GO:0003723]
J9W365	WT:uggt	TRUE	0.7	0.610336	-2.2627	-2.39354	-0.130837	0	0.913301	CNAG_06387		Cullin 1	protein ubiquitination [GO:0016567]; SCF-dependent proteasomal ubiquitin-dependent protein catabolic process [GO:0031146]	SCF ubiquitin ligase complex [GO:0019005]	protein-macromolecule adaptor activity [GO:0030674]; ubiquitin protein ligase binding [GO:0031625]
J9VP83	WT:uggt	TRUE	1	0.949256	-0.76011	-0.776757	-0.016647	0	0.988527	CNAG_00884		Exocyst complex component protein	exocytosis [GO:0006887]; Golgi to plasma membrane transport [GO:0006893]	exocyst [GO:0000145]
J9VQC2	WT:uggt	TRUE	0.4	0.366733	0.00796697	0.308461	0.300494	0	1.23157	CNAG_01323		Complex III subunit 7	mitochondrial electron transport, ubiquinol to cytochrome c [GO:0006122]	mitochondrial respiratory chain complex III [GO:0005750]
J9W1P9	WT:uggt	TRUE	0.1	0.0124927	0.702788	1.61625	0.913463	0	1.88356	CNAG_01824		Transmembrane protein	endoplasmic reticulum-plasma membrane tethering [GO:0061817]; lipid transport [GO:0006869]	membrane [GO:0016020]	lipid binding [GO:0008289]
J9VRV4	WT:uggt	TRUE	0.1	0.0456339	-3.2878	-2.38415	0.903654	0	1.8708	CNAG_04488		Very-long-chain 3-oxoacyl-CoA reductase (EC 1.1.1.330) (3-ketoacyl-CoA reductase) (3-ketoreductase) (KAR) (Microsomal beta-keto-reductase)	fatty acid elongation [GO:0030497]	endoplasmic reticulum membrane [GO:0005789]	ketoreductase activity [GO:0045703]; very-long-chain 3-oxoacyl-CoA reductase activity [GO:0141040]
J9W350	WT:uggt	TRUE	0.4	0.272057	-2.44852	-3.00243	-0.553916	0	0.681168	CNAG_06367		U3 small nucleolar RNA-associated protein 3	maturation of SSU-rRNA from tricistronic rRNA transcript (SSU-rRNA, 5.8S rRNA, LSU-rRNA) [GO:0000462]	nucleolus [GO:0005730]; small-subunit processome [GO:0032040]
J9VK80	WT:uggt	TRUE	0.1	0.0780814	0.0382795	-0.903977	-0.942256	0	0.520418	CNAG_02847		dTMP kinase (EC 2.7.4.9)	dTDP biosynthetic process [GO:0006233]; dTTP biosynthetic process [GO:0006235]; dUDP biosynthetic process [GO:0006227]	cytosol [GO:0005829]; mitochondrion [GO:0005739]; nucleus [GO:0005634]	ATP binding [GO:0005524]; nucleoside diphosphate kinase activity [GO:0004550]; thymidylate kinase activity [GO:0004798]
J9VZA0	WT:uggt	TRUE	0.7	0.454253	-0.838755	-0.672076	0.166679	0	1.12247	CNAG_01761		MARVEL domain-containing protein		membrane [GO:0016020]
J9VIQ2	WT:uggt	TRUE	1	0.531463	0.674913	0.820345	0.145431	0	1.10606	CNAG_07567		DNA-directed RNA polymerase I subunit RPA34
J9VZQ9	WT:uggt	TRUE	0.1	0.000213161	2.35312	1.58392	-0.769207	0	0.58674	CNAG_04531		Enoyl-CoA hydratase	fatty acid beta-oxidation [GO:0006635]	mitochondrion [GO:0005739]	enoyl-CoA hydratase activity [GO:0004300]
J9VYN9	WT:uggt	TRUE	0.2	0.308571	-3.11971	-2.80416	0.315541	0	1.24448	CNAG_01564		Nucleolar protein 12	ribosomal small subunit biogenesis [GO:0042274]	nucleolus [GO:0005730]	rRNA binding [GO:0019843]
J9VKR3	WT:uggt	TRUE	0.7	0.990382	1.12572	1.12308	-0.00263673	0	0.998174	CNAG_02676		Syntaxin	intracellular protein transport [GO:0006886]; vesicle docking [GO:0048278]; vesicle fusion [GO:0006906]	endomembrane system [GO:0012505]; SNARE complex [GO:0031201]	phosphatidylinositol binding [GO:0035091]; SNAP receptor activity [GO:0005484]; SNARE binding [GO:0000149]
J9VRZ4	WT:uggt	TRUE	0.4	0.169814	-1.94551	-2.59837	-0.652859	0	0.636018	CNAG_05195		Ubiquitin-conjugation factor E4 B	ERAD pathway [GO:0036503]; protein polyubiquitination [GO:0000209]; ubiquitin-dependent protein catabolic process [GO:0006511]	cytoplasm [GO:0005737]; nucleus [GO:0005634]; ubiquitin ligase complex [GO:0000151]	ubiquitin-ubiquitin ligase activity [GO:0034450]
J9VNP1	WT:uggt	TRUE	0.1	0.00393421	0.800597	0.0900291	-0.710568	0	0.61108	CNAG_01110		Tubulin-specific chaperone A	post-chaperonin tubulin folding pathway [GO:0007023]; tubulin complex assembly [GO:0007021]	cytosol [GO:0005829]; microtubule [GO:0005874]	beta-tubulin binding [GO:0048487]
J9VLM1	WT:uggt	TRUE	0.1	0.0291876	-0.81645	-1.4985	-0.68205	0	0.623279	CNAG_00453		Mitochondrial protein	mitochondrial cytochrome c oxidase assembly [GO:0033617]	mitochondrial respirasome [GO:0005746]
J9VKP9	WT:uggt	TRUE	0.1	0.00700337	-2.06516	-1.52343	0.541738	0	1.45572	CNAG_01104		Ribosomal RNA-processing protein 8 (EC 2.1.1.-)	cellular response to glucose starvation [GO:0042149]; rDNA heterochromatin formation [GO:0000183]; regulation of transcription by glucose [GO:0046015]; ribosomal large subunit biogenesis [GO:0042273]	chromatin silencing complex [GO:0005677]; nucleolus [GO:0005730]; rDNA heterochromatin [GO:0033553]	methylated histone binding [GO:0035064]; rRNA (adenine) methyltransferase activity [GO:0016433]
J9VSW0	WT:uggt	TRUE	0.1	0.0144737	-1.46643	-2.30438	-0.837951	0	0.559438	CNAG_02115		Nonhistone protein 6	regulation of transcription by RNA polymerase II [GO:0006357]	nucleus [GO:0005634]	DNA binding, bending [GO:0008301]
J9VSM6	WT:uggt	TRUE	0.1	0.0343442	-0.519501	-1.3985	-0.878999	0	0.543745	CNAG_01413		Nucleolysin TIA-1/TIAR			mRNA binding [GO:0003729]
J9W2H8	WT:uggt	TRUE	0.7	0.94841	-0.824291	-0.827189	-0.00289757	0	0.997994	CNAG_07903		Rho guanyl-nucleotide exchange factor			guanyl-nucleotide exchange factor activity [GO:0005085]
J9VIR0	WT:uggt	TRUE	0.1	0.000470725	2.28979	1.31383	-0.975966	0	0.508399	CNAG_07808		alanine--glyoxylate transaminase (EC 2.6.1.44)	glycine biosynthetic process, by transamination of glyoxylate [GO:0019265]	peroxisome [GO:0005777]	alanine-glyoxylate transaminase activity [GO:0008453]; serine-pyruvate transaminase activity [GO:0004760]
J9VLN6	WT:uggt	TRUE	0.2	0.0819925	-0.894477	-0.622748	0.271729	0	1.20725	CNAG_03994		Leucine carboxyl methyltransferase 1 (EC 2.1.1.233)	methylation [GO:0032259]	cytosol [GO:0005829]	protein C-terminal leucine carboxyl O-methyltransferase activity [GO:0018423]
J9W0J6	WT:uggt	TRUE	0.1	0.0574048	-3.53312	-3.12835	0.404771	0	1.32388	CNAG_04647		Glutathione synthetase (GSH-S) (EC 6.3.2.3)		cytosol [GO:0005829]	ATP binding [GO:0005524]; glutathione binding [GO:0043295]; glutathione synthase activity [GO:0004363]; magnesium ion binding [GO:0000287]
J9VNL9	WT:uggt	TRUE	1	0.900751	-0.826644	-0.799255	0.0273884	0	1.01917	CNAG_06563		Eukaryotic translation initiation factor 3 subunit F (eIF3f)	formation of cytoplasmic translation initiation complex [GO:0001732]	eukaryotic 43S preinitiation complex [GO:0016282]; eukaryotic 48S preinitiation complex [GO:0033290]; eukaryotic translation initiation factor 3 complex, eIF3m [GO:0071541]	metallopeptidase activity [GO:0008237]; translation initiation factor activity [GO:0003743]; translation initiation factor binding [GO:0031369]
J9VJB1	WT:uggt	TRUE	0.1	0.0158601	0.224137	-0.529381	-0.753518	0	0.593156	CNAG_07805		Insulysin	amyloid-beta metabolic process [GO:0050435]; hormone catabolic process [GO:0042447]; peptide catabolic process [GO:0043171]; proteolysis involved in protein catabolic process [GO:0051603]	cytosol [GO:0005829]; mitochondrion [GO:0005739]; peroxisomal matrix [GO:0005782]	metal ion binding [GO:0046872]; metalloendopeptidase activity [GO:0004222]
J9VST2	WT:uggt	TRUE	0.1	0.0730958	4.89634	3.86347	-1.03287	0	0.488738	CNAG_03221		60S ribosomal protein L29	cytoplasmic translation [GO:0002181]	cytosolic large ribosomal subunit [GO:0022625]	structural constituent of ribosome [GO:0003735]
J9VKI4	WT:uggt	TRUE	0.4	0.456539	-1.70436	-1.97061	-0.266254	0	0.831476	CNAG_01173		Uncharacterized protein		nucleus [GO:0005634]	DNA-binding transcription activator activity, RNA polymerase II-specific [GO:0001228]; RNA polymerase II cis-regulatory region sequence-specific DNA binding [GO:0000978]
J9VRY3	WT:uggt	TRUE	1	0.819453	-2.99133	-3.16102	-0.169691	0	0.889033	CNAG_05852		Heme oxygenase 2	heme catabolic process [GO:0042167]; heme oxidation [GO:0006788]; response to oxidative stress [GO:0006979]	membrane [GO:0016020]	heme binding [GO:0020037]; heme oxygenase (decyclizing) activity [GO:0004392]
J9VHV9	WT:uggt	TRUE	1	0.86054	-0.81453	-0.846594	-0.0320633	0	0.978021	CNAG_00066		Membrane protein	transmembrane transport [GO:0055085]	membrane [GO:0016020]
J9VT53	WT:uggt	TRUE	0.7	0.42821	-3.40439	-3.61235	-0.207959	0	0.865761	CNAG_03376		RING-type E3 ubiquitin transferase (EC 2.3.2.27)	double-strand break repair [GO:0006302]; protein K48-linked ubiquitination [GO:0070936]; ubiquitin-dependent protein catabolic process [GO:0006511]	cell division site [GO:0032153]; cytosol [GO:0005829]; nucleus [GO:0005634]; site of double-strand break [GO:0035861]; ubiquitin ligase complex [GO:0000151]	histone binding [GO:0042393]; metal ion binding [GO:0046872]; ubiquitin protein ligase activity [GO:0061630]
J9VUA0	WT:uggt	TRUE	0.1	0.0501135	-2.16667	-1.72071	0.445957	0	1.36222	CNAG_04234		Uncharacterized protein	mRNA export from nucleus [GO:0006406]; positive regulation of DNA-templated transcription, elongation [GO:0032786]	THO complex part of transcription export complex [GO:0000445]	mRNA binding [GO:0003729]
J9VJH0	WT:uggt	TRUE	0.7	0.199583	0.391094	0.901487	0.510393	0	1.42444	CNAG_05109		CBS and PB1 domain-containing protein		membrane [GO:0016020]
J9VK10	WT:uggt	TRUE	0.1	0.0286243	-1.73934	-1.26731	0.472034	0	1.38706	CNAG_05311		Arsenite-resistant protein ASR2	mRNA processing [GO:0006397]; primary miRNA processing [GO:0031053]	nuclear body [GO:0016604]	RNA binding [GO:0003723]
J9VUE1	WT:uggt	TRUE	0.1	0.0356965	1.13125	0.729301	-0.401944	0	0.756838	CNAG_01871		Prolactin regulatory element-binding protein	protein secretion [GO:0009306]; regulation of COPII vesicle coating [GO:0003400]	endoplasmic reticulum membrane [GO:0005789]	GTPase activator activity [GO:0005096]; guanyl-nucleotide exchange factor activity [GO:0005085]
J9VWP4	WT:uggt	TRUE	0.7	0.684051	-3.46224	-3.64617	-0.183928	0	0.880303	CNAG_05811		Ribosomal RNA-processing protein 42	exonucleolytic trimming to generate mature 3'-end of 5.8S rRNA from tricistronic rRNA transcript (SSU-rRNA, 5.8S rRNA, LSU-rRNA) [GO:0000467]; nuclear mRNA surveillance [GO:0071028]; nuclear polyadenylation-dependent mRNA catabolic process [GO:0071042]; nuclear polyadenylation-dependent rRNA catabolic process [GO:0071035]; rRNA catabolic process [GO:0016075]; TRAMP-dependent tRNA surveillance pat…	cytoplasmic exosome (RNase complex) [GO:0000177]; nuclear exosome (RNase complex) [GO:0000176]
J9VHS8	WT:uggt	TRUE	0.7	0.467322	0.607748	0.68493	0.0771823	0	1.05496	CNAG_02712		non-specific serine/threonine protein kinase (EC 2.7.11.1)	tRNA processing [GO:0008033]; tRNA threonylcarbamoyladenosine metabolic process [GO:0070525]	chromosome, telomeric region [GO:0000781]; cytosol [GO:0005829]; EKC/KEOPS complex [GO:0000408]; nucleus [GO:0005634]	ATP binding [GO:0005524]; protein serine/threonine kinase activity [GO:0004674]
J9VP67	WT:uggt	TRUE	0.1	0.00456198	1.82262	1.29412	-0.528499	0	0.693276	CNAG_05725		Ketol-acid reductoisomerase, mitochondrial (EC 1.1.1.86) (Acetohydroxy-acid reductoisomerase) (Alpha-keto-beta-hydroxylacyl reductoisomerase)	isoleucine biosynthetic process [GO:0009097]; valine biosynthetic process [GO:0009099]	cytosol [GO:0005829]; mitochondrion [GO:0005739]	isomerase activity [GO:0016853]; ketol-acid reductoisomerase activity [GO:0004455]; metal ion binding [GO:0046872]
J9VH51	WT:uggt	TRUE	0.1	0.130137	-0.839888	-0.38696	0.452927	0	1.36881	CNAG_07510		Squalene synthase (SQS) (SS) (EC 2.5.1.21)	cholesterol biosynthetic process [GO:0006695]; ergosterol biosynthetic process [GO:0006696]; farnesyl diphosphate metabolic process [GO:0045338]	endoplasmic reticulum membrane [GO:0005789]	farnesyl-diphosphate farnesyltransferase activity [GO:0004310]; farnesyltranstransferase activity [GO:0004311]; squalene synthase activity [GO:0051996]
J9VTL8	WT:uggt	TRUE	0.4	0.12046	-1.33699	-0.636238	0.700757	0	1.62536	CNAG_01593		Ribosome biogenesis protein SSF1/2	rRNA processing [GO:0006364]	preribosome, large subunit precursor [GO:0030687]	rRNA binding [GO:0019843]
J9VMG4	WT:uggt	TRUE	0.4	0.264078	-1.07703	-1.41516	-0.338134	0	0.791064	CNAG_02421		Manganese/iron superoxide dismutase C-terminal domain-containing protein			superoxide dismutase activity [GO:0004784]
J9VGF3	WT:uggt	TRUE	0.1	0.0120237	-2.19537	-3.07213	-0.876753	0	0.544592	CNAG_03957		4-nitrophenylphosphatase (PNPPase) (EC 3.1.3.41)			alkaline phosphatase activity [GO:0004035]; metal ion binding [GO:0046872]; phosphoglycolate phosphatase activity [GO:0008967]
J9VKM6	WT:uggt	TRUE	0.4	0.290429	-2.47884	-2.22877	0.250076	0	1.18927	CNAG_01129		Terpene cyclase/mutase family member (EC 5.4.99.-)	cholesterol biosynthetic process [GO:0006695]; ergosterol biosynthetic process [GO:0006696]; triterpenoid biosynthetic process [GO:0016104]	lipid droplet [GO:0005811]	lanosterol synthase activity [GO:0000250]
J9W142	WT:uggt	TRUE	0.1	0.114722	-2.33209	-3.08999	-0.757905	0	0.591355	CNAG_06467		CMP/dCMP-type deaminase domain-containing protein	nucleobase-containing compound metabolic process [GO:0006139]		catalytic activity [GO:0003824]
Q58Z64	WT:uggt	TRUE	0.1	0.0502089	-1.31546	-0.500893	0.814569	0	1.75877	CNAG_01537	VAD1	ATP-dependent RNA helicase VAD1 (EC 3.6.4.13) (Virulence-associated DEAD box protein 1)	mRNA processing [GO:0006397]; mRNA transport [GO:0051028]; negative regulation of translation [GO:0017148]; P-body assembly [GO:0033962]; stress granule assembly [GO:0034063]	cytoplasmic stress granule [GO:0010494]; P-body [GO:0000932]	ATP binding [GO:0005524]; ATP hydrolysis activity [GO:0016887]; mRNA binding [GO:0003729]; RNA helicase activity [GO:0003724]
J9VJH4	WT:uggt	TRUE	0.1	0.0453888	0.337217	0.0117284	-0.325489	0	0.798028	CNAG_04071		Proteasome subunit alpha type	proteasomal protein catabolic process [GO:0010498]; ubiquitin-dependent protein catabolic process [GO:0006511]	cytoplasm [GO:0005737]; nucleus [GO:0005634]; proteasome core complex, alpha-subunit complex [GO:0019773]
J9VUR5	WT:uggt	TRUE	0.1	0.0243551	-0.714797	-0.871885	-0.157088	0	0.896833	CNAG_02403		NADH dehydrogenase [ubiquinone] 1 beta subcomplex subunit 9 (Complex I-B22) (NADH-ubiquinone oxidoreductase B22 subunit)	mitochondrial electron transport, NADH to ubiquinone [GO:0006120]	mitochondrial respiratory chain complex I [GO:0005747]
J9VVX5	WT:uggt	TRUE	0.4	0.490671	-3.69224	-3.48496	0.207283	0	1.15451	CNAG_03550		Zinc finger HIT domain-containing protein 1	chromatin remodeling [GO:0006338]	membrane [GO:0016020]; Swr1 complex [GO:0000812]	nucleosome binding [GO:0031491]
J9VU82	WT:uggt	TRUE	0.4	0.368474	0.785126	1.04186	0.256734	0	1.19477	CNAG_01800		Uncharacterized protein
J9VS72	WT:uggt	TRUE	0.2	0.139852	-3.75533	-5.18779	-1.43247	0	0.370497	CNAG_02394		Coenzyme Q-binding protein COQ10 START domain-containing protein	cellular respiration [GO:0045333]	mitochondrion [GO:0005739]	ubiquinone binding [GO:0048039]
J9VVE3	WT:uggt	TRUE	1	0.669865	-3.2046	-2.94131	0.263289	0	1.20021	CNAG_03359		Cytochrome c oxidase subunit 9, mitochondrial (Cytochrome c oxidase polypeptide VIIA)	mitochondrial electron transport, cytochrome c to oxygen [GO:0006123]	mitochondrial inner membrane [GO:0005743]	cytochrome-c oxidase activity [GO:0004129]
J9VKQ9	WT:uggt	TRUE	0.1	0.0059526	-2.18038	-1.26709	0.913284	0	1.88333	CNAG_01094		Pre-mRNA-splicing factor CWC25	mRNA splicing, via spliceosome [GO:0000398]	U2-type spliceosomal complex [GO:0005684]
J9VSC4	WT:uggt	TRUE	0.4	0.246856	4.32494	4.46862	0.143679	0	1.10472	CNAG_02330		Large subunit ribosomal protein L21e	translation [GO:0006412]	cytosolic large ribosomal subunit [GO:0022625]	structural constituent of ribosome [GO:0003735]
J9VTI9	WT:uggt	TRUE	0.1	0.0157993	-2.52321	-1.58379	0.939411	0	1.91775	CNAG_06613		Endoplasmic reticulum protein	cellular response to misfolded protein [GO:0071218]; chaperone cofactor-dependent protein refolding [GO:0051085]	endoplasmic reticulum membrane [GO:0005789]	Hsp70 protein binding [GO:0030544]
J9VKZ5	WT:uggt	TRUE	0.2	0.0944935	-1.82985	-1.25452	0.575326	0	1.49001	CNAG_07029		Synaptobrevin homolog YKT6	exocytosis [GO:0006887]; vesicle fusion [GO:0006906]	intracellular membrane-bounded organelle [GO:0043231]; SNARE complex [GO:0031201]	SNAP receptor activity [GO:0005484]; SNARE binding [GO:0000149]
J9VTL1	WT:uggt	TRUE	0.7	0.755277	-2.57513	-2.44156	0.133569	0	1.097	CNAG_01587		RNA polymerase-associated protein LEO1	positive regulation of transcription elongation by RNA polymerase II [GO:0032968]; transcription elongation by RNA polymerase II [GO:0006368]	Cdc73/Paf1 complex [GO:0016593]	RNA polymerase II C-terminal domain phosphoserine binding [GO:1990269]
T2BNV8	WT:uggt	TRUE	0.1	0.00356312	-3.14263	-2.32562	0.81701	0	1.76175	CNAG_01376		Stress response protein NST1	microtubule cytoskeleton organization [GO:0000226]	cytoplasm [GO:0005737]; microtubule cytoskeleton [GO:0015630]
J9VLC2	WT:uggt	TRUE	0.4	0.483418	-1.87997	-1.79378	0.086199	0	1.06157	CNAG_07355		ABC transporter domain-containing protein
J9VVY9	WT:uggt	TRUE	0.1	0.0291156	-1.38706	-0.818032	0.569029	0	1.48352	CNAG_04639		GDP/GTP exchange factor Sec2 N-terminal domain-containing protein	exocytosis [GO:0006887]	cell tip [GO:0051286]; Golgi to plasma membrane transport vesicle [GO:0070319]	guanyl-nucleotide exchange factor activity [GO:0005085]
J9VJ64	WT:uggt	TRUE	0.1	0.00539684	-0.0213552	0.691684	0.71304	0	1.63925	CNAG_03941		Proteasome subunit alpha type	proteasomal protein catabolic process [GO:0010498]; ubiquitin-dependent protein catabolic process [GO:0006511]	cytoplasm [GO:0005737]; nucleus [GO:0005634]; proteasome core complex, alpha-subunit complex [GO:0019773]
J9VWL9	WT:uggt	TRUE	0.7	0.553064	0.534331	0.240785	-0.293546	0	0.815894	CNAG_05781		Dynein light chain	microtubule-based process [GO:0007017]	cytoplasm [GO:0005737]; cytoplasmic dynein complex [GO:0005868]; microtubule [GO:0005874]	dynein intermediate chain binding [GO:0045505]
J9VH50	WT:uggt	TRUE	0.7	0.713422	-1.17249	-1.13378	0.0387018	0	1.02719	CNAG_00570		cAMP-dependent protein kinase regulatory subunit	regulation of protein phosphorylation [GO:0001932]	cAMP-dependent protein kinase complex [GO:0005952]; nucleus [GO:0005634]	cAMP binding [GO:0030552]; cAMP-dependent protein kinase inhibitor activity [GO:0004862]; kinase activity [GO:0016301]; protein kinase A catalytic subunit binding [GO:0034236]
J9VP68	WT:uggt	TRUE	0.7	0.240811	4.73878	4.45694	-0.281842	0	0.82254	CNAG_07703		Uncharacterized protein
J9VYQ4	WT:uggt	TRUE	0.4	0.311931	-1.60839	-1.85255	-0.244158	0	0.844308	CNAG_01579		Vacuolar membrane-associated protein IML1 (Vacuolar membrane-associated protein iml1)	cellular response to amino acid starvation [GO:0034198]; intracellular signal transduction [GO:0035556]; negative regulation of TORC1 signaling [GO:1904262]; positive regulation of autophagy [GO:0010508]	GATOR1 complex [GO:1990130]; vacuolar membrane [GO:0005774]	GTPase activator activity [GO:0005096]
J9VQ80	WT:uggt	TRUE	0.4	0.450573	-2.03857	-2.32714	-0.288572	0	0.818712	CNAG_03408		Mitochondrial inner membrane protein		membrane [GO:0016020]
J9VGW6	WT:uggt	TRUE	0.1	0.00787405	-0.166666	-0.94417	-0.777504	0	0.583375	CNAG_03048		gluconokinase (EC 2.7.1.12) (Gluconate kinase)	D-gluconate catabolic process [GO:0046177]	cytoplasm [GO:0005737]	ATP binding [GO:0005524]; gluconokinase activity [GO:0046316]
J9VQP6	WT:uggt	TRUE	0.1	0.0451288	-1.62911	-1.24462	0.384489	0	1.3054	CNAG_02672		60S ribosomal export protein NMD3	protein transport [GO:0015031]; ribosomal large subunit export from nucleus [GO:0000055]	cytoplasm [GO:0005737]; nucleus [GO:0005634]	ribosomal large subunit binding [GO:0043023]
J9VGK3	WT:uggt	TRUE	0.7	0.244794	0.232816	0.736157	0.503341	0	1.41749	CNAG_04017		Peptide-methionine (R)-S-oxide reductase (EC 1.8.4.12)	protein repair [GO:0030091]; response to oxidative stress [GO:0006979]		metal ion binding [GO:0046872]; peptide-methionine (R)-S-oxide reductase activity [GO:0033743]
J9VWZ6	WT:uggt	TRUE	1	0.600968	-1.62519	-1.76522	-0.140033	0	0.907499	CNAG_05926		U2 small nuclear ribonucleoprotein A'	mRNA splicing, via spliceosome [GO:0000398]	U2 snRNP [GO:0005686]	U2 snRNA binding [GO:0030620]
J9VR84	WT:uggt	TRUE	0.1	0.00563077	-0.695984	-1.34635	-0.650367	0	0.637118	CNAG_03564		Alpha/beta hydrolase fold-3 domain-containing protein			short-chain carboxylesterase activity [GO:0034338]
J9VQ02	WT:uggt	TRUE	0.1	0.0028924	2.74007	2.26072	-0.479354	0	0.717299	CNAG_03114		Inhibitor I9 domain-containing protein
J9VJX4	WT:uggt	TRUE	0.1	0.0195646	-0.703677	-1.08942	-0.385744	0	0.765384	CNAG_02952		COX assembly mitochondrial protein		mitochondrial inner membrane [GO:0005743]
J9VS30	WT:uggt	TRUE	1	0.474754	-2.04536	-2.25008	-0.204719	0	0.867708	CNAG_02445		Phosphoacetylglucosamine mutase (PAGM) (EC 5.4.2.3) (Acetylglucosamine phosphomutase) (N-acetylglucosamine-phosphate mutase)	carbohydrate metabolic process [GO:0005975]; fungal-type cell wall chitin biosynthetic process [GO:0034221]; hemopoiesis [GO:0030097]; UDP-N-acetylglucosamine biosynthetic process [GO:0006048]		magnesium ion binding [GO:0000287]; phosphoacetylglucosamine mutase activity [GO:0004610]
J9VXH9	WT:uggt	TRUE	0.1	0.102251	-0.408055	-0.698737	-0.290682	0	0.817516	CNAG_03159		Cytoplasmic protein	positive regulation of JNK cascade [GO:0046330]; protein targeting to chloroplast [GO:0045036]	cytoplasm [GO:0005737]; nucleus [GO:0005634]	chloroplast targeting sequence binding [GO:0030941]
J9VNI8	WT:uggt	TRUE	0.2	0.0951902	-1.65318	-1.89575	-0.242566	0	0.84524	CNAG_07669		Sorting nexin-3	endocytic recycling [GO:0032456]; late endosome to Golgi transport [GO:0034499]	early endosome membrane [GO:0031901]; retromer complex [GO:0030904]	phosphatidylinositol-3-phosphate binding [GO:0032266]
J9VSR3	WT:uggt	TRUE	0.1	0.0160386	0.961687	-0.0373625	-0.99905	0	0.500329	CNAG_02156		Uncharacterized protein		membrane [GO:0016020]
J9VQW4	WT:uggt	TRUE	0.2	0.0983817	-0.897019	-0.526253	0.370766	0	1.29304	CNAG_02597		Uncharacterized protein		nucleus [GO:0005634]	metal ion binding [GO:0046872]; RNA binding [GO:0003723]
J9W0J5	WT:uggt	TRUE	0.1	0.00699117	0.423271	-0.233935	-0.657206	0	0.634105	CNAG_06241	CFO1	Ferroxidase	cellular response to iron ion starvation [GO:0010106]; reductive iron assimilation [GO:0033215]	extracellular region [GO:0005576]; high-affinity iron permease complex [GO:0033573]	copper ion binding [GO:0005507]; ferroxidase activity [GO:0004322]
J9W1S0	WT:uggt	TRUE	0.4	0.300215	-2.79789	-3.29263	-0.494737	0	0.709691	CNAG_01850		histidine kinase (EC 2.7.13.3)	cellular hyperosmotic response [GO:0071474]	membrane [GO:0016020]	phosphorelay sensor kinase activity [GO:0000155]
J9VTX0	WT:uggt	TRUE	0.1	0.00310734	0.58414	1.12386	0.539722	0	1.45369	CNAG_05731	GOX3	Glyoxal oxidase
J9VGA4	WT:uggt	TRUE	0.1	0.00248846	-0.314697	-0.623569	-0.308872	0	0.807273	CNAG_03887		Uncharacterized protein	phospholipid translocation [GO:0045332]	cytosol [GO:0005829]; mitochondrial intermembrane space [GO:0005758]; nucleus [GO:0005634]	phosphatidic acid transfer activity [GO:1990050]
J9VUY6	WT:uggt	TRUE	0.1	0.00239083	2.00948	1.20754	-0.80194	0	0.573577	CNAG_01877	GUA1	GMP synthase [glutamine-hydrolyzing] (EC 6.3.5.2) (GMP synthetase) (Glutamine amidotransferase)	glutamine metabolic process [GO:0006541]; GMP biosynthetic process [GO:0006177]	cytosol [GO:0005829]	ATP binding [GO:0005524]; GMP synthase (glutamine-hydrolyzing) activity [GO:0003922]; GMP synthase activity [GO:0003921]
J9W0J0	WT:uggt	TRUE	1	0.79709	-3.76557	-3.6527	0.112872	0	1.08138	CNAG_06236		RNA exonuclease NGL2			poly(A)-specific ribonuclease activity [GO:0004535]
J9VHQ2	WT:uggt	TRUE	0.1	0.000399407	-1.48959	-0.831663	0.657925	0	1.57781	CNAG_00006		Prohibitin	mitochondrion organization [GO:0007005]	mitochondrial inner membrane [GO:0005743]
J9VT80	WT:uggt	TRUE	0.1	0.0689088	-2.17278	-0.980242	1.19254	0	2.28555	CNAG_03403		Mitochondrial protein		cytosol [GO:0005829]; mitochondrion [GO:0005739]
J9VMF7	WT:uggt	TRUE	0.7	0.824352	-0.539379	-0.428741	0.110638	0	1.07971	CNAG_07400		aspartate--tRNA ligase (EC 6.1.1.12)	aspartyl-tRNA aminoacylation [GO:0006422]	aminoacyl-tRNA synthetase multienzyme complex [GO:0017101]; cytosol [GO:0005829]	aspartate-tRNA ligase activity [GO:0004815]; ATP binding [GO:0005524]; RNA binding [GO:0003723]
J9VGB0	WT:uggt	TRUE	0.1	0.00110614	-3.03462	-2.09264	0.941982	0	1.92117	CNAG_03673		Serine/threonine-protein phosphatase (EC 3.1.3.16)		cytoplasm [GO:0005737]; nucleus [GO:0005634]	metal ion binding [GO:0046872]; myosin phosphatase activity [GO:0017018]
J9VT83	WT:uggt	TRUE	0.1	0.0198676	-1.13247	-1.81428	-0.681809	0	0.623383	CNAG_01241		Enzyme regulator
J9VZP2	WT:uggt	TRUE	0.7	0.566594	-0.978268	-1.03674	-0.0584738	0	0.960279	CNAG_01954		Aldo-keto reductase		cytoplasm [GO:0005737]	aldo-keto reductase (NADPH) activity [GO:0004033]
J9VSZ4	WT:uggt	TRUE	0.1	0.204351	0.952906	0.694029	-0.258878	0	0.835738	CNAG_03295		CBM21 domain-containing protein	regulation of glycogen biosynthetic process [GO:0005979]	protein phosphatase type 1 complex [GO:0000164]	glycogen binding [GO:2001069]; protein phosphatase 1 binding [GO:0008157]
J9VZB5	WT:uggt	TRUE	1	0.817033	-1.74146	-1.69335	0.0481166	0	1.03391	CNAG_04354		Exopolyphosphatase		cytoplasm [GO:0005737]; membrane [GO:0016020]	exopolyphosphatase activity [GO:0004309]; metal ion binding [GO:0046872]
J9W491	WT:uggt	TRUE	0.1	0.0129513	-3.1489	-2.15783	0.991062	0	1.98765	CNAG_05629		Endoribonuclease YSH1	mRNA 3'-end processing by stem-loop binding and cleavage [GO:0006398]	mRNA cleavage and polyadenylation specificity factor complex [GO:0005847]	5'-3' RNA exonuclease activity [GO:0004534]; RNA binding [GO:0003723]; RNA endonuclease activity [GO:0004521]
J9VY38	WT:uggt	TRUE	0.1	0.017402	-1.59616	-1.89061	-0.294449	0	0.815384	CNAG_04684		Protein transport protein SEC23	COPII-coated vesicle cargo loading [GO:0090110]; intracellular protein transport [GO:0006886]	COPII vesicle coat [GO:0030127]; endoplasmic reticulum exit site [GO:0070971]; endoplasmic reticulum membrane [GO:0005789]; Golgi membrane [GO:0000139]	GTPase activator activity [GO:0005096]; zinc ion binding [GO:0008270]
J9VY39	WT:uggt	TRUE	0.1	0.00825779	0.58588	1.08475	0.498868	0	1.4131	CNAG_06106		Chaperone regulator	chaperone cofactor-dependent protein refolding [GO:0051085]; translational initiation [GO:0006413]	cytosol [GO:0005829]	protein-folding chaperone binding [GO:0051087]; unfolded protein binding [GO:0051082]
J9VV58	WT:uggt	TRUE	0.7	0.451208	-1.81334	-1.36449	0.448846	0	1.36495	CNAG_03238		Dioxygenase subfamily protein			iron ion binding [GO:0005506]; oxidoreductase activity, acting on single donors with incorporation of molecular oxygen, incorporation of two atoms of oxygen [GO:0016702]
J9VTN1	WT:uggt	TRUE	0.7	0.365973	-1.00957	-0.870363	0.139211	0	1.1013	CNAG_01071		Zn(2)-C6 fungal-type domain-containing protein	positive regulation of transcription by RNA polymerase II [GO:0045944]	nucleus [GO:0005634]	DNA-binding transcription factor activity, RNA polymerase II-specific [GO:0000981]; transcription cis-regulatory region binding [GO:0000976]; zinc ion binding [GO:0008270]
J9VPS6	WT:uggt	TRUE	0.7	0.207663	0.0440947	0.538973	0.494878	0	1.4092	CNAG_02443		NADH dehydrogenase		mitochondrial respiratory chain complex I [GO:0005747]
J9VI81	WT:uggt	TRUE	0.1	0.0197614	-1.674	-1.20172	0.472279	0	1.3873	CNAG_03607		RING-type domain-containing protein	negative regulation of extrinsic apoptotic signaling pathway via death domain receptors [GO:1902042]; proteasome-mediated ubiquitin-dependent protein catabolic process [GO:0043161]; protein K48-linked ubiquitination [GO:0070936]	cytoplasm [GO:0005737]; plasma membrane [GO:0005886]	metal ion binding [GO:0046872]; ubiquitin protein ligase activity [GO:0061630]
J9VQT0	WT:uggt	TRUE	0.1	0.0124902	-0.705641	-1.63056	-0.924923	0	0.526708	CNAG_01199		Nuclear pore complex protein Nup62	protein import into nucleus [GO:0006606]; RNA export from nucleus [GO:0006405]	nuclear pore central transport channel [GO:0044613]	phospholipid binding [GO:0005543]; structural constituent of nuclear pore [GO:0017056]
J9W1I4	WT:uggt	TRUE	0.1	0.0169071	-2.82701	-2.30768	0.519335	0	1.43329	CNAG_01722		Vacuolar protein sorting-associated protein	late endosome to vacuole transport [GO:0045324]; lipid transport [GO:0006869]; mitochondrion organization [GO:0007005]; protein retention in Golgi apparatus [GO:0045053]; protein targeting to vacuole [GO:0006623]	extrinsic component of membrane [GO:0019898]; Golgi apparatus [GO:0005794]
J9VTD6	WT:uggt	TRUE	0.2	0.099224	-1.84939	-1.22069	0.628697	0	1.54617	CNAG_01179		DNA-directed RNA polymerase I and III subunit RPAC1		RNA polymerase I complex [GO:0005736]; RNA polymerase III complex [GO:0005666]	protein dimerization activity [GO:0046983]; RNA polymerase I activity [GO:0001054]; RNA polymerase III activity [GO:0001056]
T2BNQ6	WT:uggt	TRUE	0.1	0.102698	-1.83723	-0.697285	1.13994	0	2.20372	CNAG_07975		Uncharacterized protein		membrane [GO:0016020]
J9VGC9	WT:uggt	TRUE	0.1	0.00922226	1.39774	1.0422	-0.355538	0	0.781578	CNAG_03927		Bola-like protein	protein maturation by [4Fe-4S] cluster transfer [GO:0106035]	mitochondrial matrix [GO:0005759]
J9W1S4	WT:uggt	TRUE	0.4	0.154296	-3.24506	-4.1085	-0.863441	0	0.54964	CNAG_05513		Septum-promoting GTP-binding protein 1	positive regulation of mitotic division septum assembly [GO:0140281]	spindle pole body [GO:0005816]	GTP binding [GO:0005525]; GTPase activity [GO:0003924]
J9VGM9	WT:uggt	TRUE	0.7	0.768324	-2.15938	-2.25078	-0.091398	0	0.938613	CNAG_03796		non-specific serine/threonine protein kinase (EC 2.7.11.1)	regulation of vacuole fusion, non-autophagic [GO:0032889]; vacuolar protein processing [GO:0006624]	Golgi apparatus [GO:0005794]; vacuole [GO:0005773]	ATP binding [GO:0005524]; protein serine/threonine kinase activity [GO:0004674]
J9VVH5	WT:uggt	TRUE	0.1	0.00127891	-2.88565	-3.73378	-0.848132	0	0.555504	CNAG_06224		Nuclear movement protein nudC	protein folding [GO:0006457]	cytoplasm [GO:0005737]	unfolded protein binding [GO:0051082]
J9VL37	WT:uggt	TRUE	0.4	0.259191	-3.70941	-4.1613	-0.451886	0	0.731087	CNAG_00932		NAD(P)-binding domain-containing protein
J9VM70	WT:uggt	TRUE	0.1	0.0581297	-2.26353	-3.53557	-1.27204	0	0.414073	CNAG_02998		Nuclear protein	mRNA splicing, via spliceosome [GO:0000398]	post-mRNA release spliceosomal complex [GO:0071014]	nucleic acid binding [GO:0003676]; RNA lariat debranching enzyme activator activity [GO:0061632]; zinc ion binding [GO:0008270]
J9VQB7	WT:uggt	TRUE	0.2	0.204573	-3.41257	-3.99958	-0.587018	0	0.665718	CNAG_07717		ubiquitinyl hydrolase 1 (EC 3.4.19.12)		nucleus [GO:0005634]	cysteine-type deubiquitinase activity [GO:0004843]
J9VQ11	WT:uggt	TRUE	0.7	0.457776	-3.6195	-3.20984	0.409655	0	1.32837	CNAG_03331	PSD1	Phosphatidylserine decarboxylase proenzyme 1, mitochondrial (EC 4.1.1.65) [Cleaved into: Phosphatidylserine decarboxylase 1 beta chain; Phosphatidylserine decarboxylase 1 alpha chain]	phosphatidylethanolamine biosynthetic process [GO:0006646]; protein autoprocessing [GO:0016540]	mitochondrial inner membrane [GO:0005743]	phosphatidylserine decarboxylase activity [GO:0004609]
J9VT39	WT:uggt	TRUE	1	0.668905	-0.369791	-0.269417	0.100374	0	1.07205	CNAG_04817		BolA protein	[4Fe-4S] cluster assembly [GO:0044572]	mitochondrial matrix [GO:0005759]
J9VZC6	WT:uggt	TRUE	0.7	0.681514	-1.33897	-1.27962	0.0593457	0	1.04199	CNAG_01802		Fe-S cluster assembly protein DRE2	iron-sulfur cluster assembly [GO:0016226]	mitochondrial intermembrane space [GO:0005758]	2 iron, 2 sulfur cluster binding [GO:0051537]; 4 iron, 4 sulfur cluster binding [GO:0051539]; electron transfer activity [GO:0009055]; metal ion binding [GO:0046872]
J9VQS1	WT:uggt	TRUE	0.1	0.00309667	-1.8054	-2.6712	-0.865799	0	0.548742	CNAG_03391		Sensitive to high expression protein 9, mitochondrial	inner mitochondrial membrane organization [GO:0007007]	mitochondrial inner membrane [GO:0005743]
J9VFS1	WT:uggt	TRUE	0.1	0.0244717	-2.77196	-2.15715	0.614806	0	1.53135	CNAG_00063		CENP-A homolog (CENPA homolog)		chromosome, centromeric region [GO:0000775]; nucleosome [GO:0000786]; nucleus [GO:0005634]	DNA binding [GO:0003677]; protein heterodimerization activity [GO:0046982]; structural constituent of chromatin [GO:0030527]
J9VX84	WT:uggt	TRUE	0.1	0.0411671	-0.545836	-1.09699	-0.551153	0	0.682474	CNAG_05440		pyridoxal 5'-phosphate synthase (EC 1.4.3.5)	pyridoxine biosynthetic process [GO:0008615]		FMN binding [GO:0010181]; pyridoxamine phosphate oxidase activity [GO:0004733]
J9VTJ0	WT:uggt	TRUE	1	0.855371	-0.679322	-0.716817	-0.0374944	0	0.974346	CNAG_01567		DUF1688-domain-containing protein
J9VG35	WT:uggt	TRUE	1	0.676176	-4.59851	-4.33517	0.26334	0	1.20025	CNAG_03836		Uncharacterized protein		cytoplasm [GO:0005737]
J9VS59	WT:uggt	TRUE	0.7	0.734287	-2.29028	-2.20122	0.0890609	0	1.06368	CNAG_02409		Protein YOP1		membrane [GO:0016020]
J9VKR1	WT:uggt	TRUE	0.4	0.263442	-2.92355	-3.52293	-0.599379	0	0.660038	CNAG_01309		ADP-ribosylation factor-like protein 1	intracellular protein transport [GO:0006886]; vesicle-mediated transport [GO:0016192]	Golgi apparatus [GO:0005794]	GTP binding [GO:0005525]; GTPase activity [GO:0003924]
J9VTC9	WT:uggt	TRUE	0.1	0.0346318	-0.326773	0.119769	0.446542	0	1.36277	CNAG_04715		Dolichyl-diphosphooligosaccharide--protein glycosyltransferase subunit 1	protein N-linked glycosylation via asparagine [GO:0018279]	oligosaccharyltransferase complex [GO:0008250]	transferase activity [GO:0016740]
J9VS96	WT:uggt	TRUE	0.1	0.00181663	0.156039	-0.792672	-0.948711	0	0.518095	CNAG_04879		Glycogen debranching enzyme	glycogen catabolic process [GO:0005980]	cytoplasm [GO:0005737]	4-alpha-glucanotransferase activity [GO:0004134]; amylo-alpha-1,6-glucosidase activity [GO:0004135]
J9VR39	WT:uggt	TRUE	0.2	0.100604	-3.03373	-3.69666	-0.662931	0	0.631594	CNAG_07741		Cytoplasmic protein			metalloaminopeptidase activity [GO:0070006]
J9VXT1	WT:uggt	TRUE	0.7	0.504658	-2.54582	-2.2034	0.342419	0	1.26788	CNAG_03290		STE/STE20/YSK protein kinase		cytoplasm [GO:0005737]	ATP binding [GO:0005524]; protein serine/threonine kinase activity [GO:0004674]
J9VYC7	WT:uggt	TRUE	0.7	0.418126	-1.81329	-2.05291	-0.239613	0	0.846973	CNAG_03512		Mitochondrial K+-H+ exchange-related-domain-containing protein	potassium ion transport [GO:0006813]; proton transmembrane transport [GO:1902600]	membrane [GO:0016020]
J9VYL5	WT:uggt	TRUE	0.1	0.000770682	-3.10923	-2.1229	0.986329	0	1.98114	CNAG_06281		Uncharacterized protein		membrane [GO:0016020]
J9VM29	WT:uggt	TRUE	0.4	0.159257	-1.937	-1.13204	0.804956	0	1.74709	CNAG_02300		Galactose oxidase		membrane [GO:0016020]
J9VRY2	WT:uggt	TRUE	0.2	0.07002	-3.41019	-2.58059	0.829603	0	1.7772	CNAG_04513		DNA-directed RNA polymerase subunit beta (EC 2.7.7.6)		RNA polymerase III complex [GO:0005666]	DNA binding [GO:0003677]; metal ion binding [GO:0046872]; ribonucleoside binding [GO:0032549]; RNA polymerase III activity [GO:0001056]
J9VLP2	WT:uggt	TRUE	0.1	0.00829243	-1.00995	-1.49423	-0.484283	0	0.714852	CNAG_02457		Importin beta-2 subunit	protein import into nucleus [GO:0006606]	cytoplasm [GO:0005737]; nucleus [GO:0005634]	nuclear import signal receptor activity [GO:0061608]; nuclear localization sequence binding [GO:0008139]; small GTPase binding [GO:0031267]
J9VWV2	WT:uggt	TRUE	0.1	0.00866428	-1.26191	-2.21522	-0.953315	0	0.516444	CNAG_05485		tRNA (adenine(58)-N(1))-methyltransferase catalytic subunit TRM61 (EC 2.1.1.220) (tRNA(m1A58)-methyltransferase subunit TRM61)	tRNA methylation [GO:0030488]	nucleus [GO:0005634]; tRNA (m1A) methyltransferase complex [GO:0031515]	tRNA (adenine(58)-N1)-methyltransferase activity [GO:0160107]
J9VZP4	WT:uggt	TRUE	0.7	0.556172	3.59267	3.30562	-0.287058	0	0.819571	CNAG_05466		Uncharacterized protein
J9VU96	WT:uggt	TRUE	0.1	0.01115	0.370186	-0.288142	-0.658328	0	0.633612	CNAG_04229		Phytanoyl-CoA dioxygenase			phytanoyl-CoA dioxygenase activity [GO:0048244]
J9VKC1	WT:uggt	TRUE	0.7	0.883769	-2.54844	-2.51084	0.0375999	0	1.0264	CNAG_06741		ATP-dependent RNA helicase DBP10		nucleus [GO:0005634]	ATP binding [GO:0005524]; ATP hydrolysis activity [GO:0016887]; RNA binding [GO:0003723]; RNA helicase activity [GO:0003724]
J9VMF6	WT:uggt	TRUE	0.7	0.932183	1.25393	1.2934	0.0394723	0	1.02774	CNAG_02431		TatD DNase		cytosol [GO:0005829]	3'-5'-DNA exonuclease activity [GO:0008296]; metal ion binding [GO:0046872]
J9VPG3	WT:uggt	TRUE	0.1	0.00234275	-0.77691	-0.00424849	0.772661	0	1.70842	CNAG_05219		Uncharacterized protein		Cdc73/Paf1 complex [GO:0016593]
J9VQC6	WT:uggt	TRUE	0.1	0.00667342	-3.44291	-2.77176	0.671155	0	1.59235	CNAG_01318		Sodium/hydrogen exchanger	sodium ion import across plasma membrane [GO:0098719]; vacuolar acidification [GO:0007035]	early endosome [GO:0005769]; fungal-type vacuole membrane [GO:0000329]; late endosome [GO:0005770]; plasma membrane [GO:0005886]; recycling endosome [GO:0055037]	potassium:proton antiporter activity [GO:0015386]; sodium:proton antiporter activity [GO:0015385]
J9VHI2	WT:uggt	TRUE	0.4	0.483695	1.49882	1.65049	0.151676	0	1.11086	CNAG_00711		DUF427 domain-containing protein
J9VP65	WT:uggt	TRUE	0.2	0.0717785	-4.55942	-3.41652	1.1429	0	2.20825	CNAG_07488		DUF1682-domain-containing protein	endoplasmic reticulum calcium ion homeostasis [GO:0032469]	endoplasmic reticulum [GO:0005783]; membrane [GO:0016020]	calcium ion binding [GO:0005509]
J9VKL4	WT:uggt	TRUE	0.1	0.0286439	-0.64564	-1.0569	-0.411256	0	0.751968	CNAG_01355		Thioredoxin		cytosol [GO:0005829]	protein-disulfide reductase activity [GO:0015035]
J9VEG8	WT:uggt	TRUE	0.7	0.893934	-3.20041	-3.39503	-0.194613	0	0.873807	CNAG_00255		Uncharacterized protein	protein insertion into ER membrane [GO:0045048]	endoplasmic reticulum membrane [GO:0005789]	protein folding chaperone [GO:0044183]
J9VKK9	WT:uggt	TRUE	1	0.906061	-1.17198	-1.14024	0.0317448	0	1.02225	CNAG_01360		Pumilio domain-containing protein c	nuclear-transcribed mRNA catabolic process, deadenylation-dependent decay [GO:0000288]		RNA binding [GO:0003723]
J9W286	WT:uggt	TRUE	0.1	0.0342142	-2.28324	-1.97881	0.304437	0	1.23494	CNAG_05997		Uncharacterized protein		mitochondrion [GO:0005739]
J9VZZ5	WT:uggt	TRUE	0.1	0.0492758	1.29998	1.74897	0.448983	0	1.36508	CNAG_05603		Bud22 domain-containing protein	maturation of SSU-rRNA [GO:0030490]	90S preribosome [GO:0030686]; nucleus [GO:0005634]
J9VMH8	WT:uggt	TRUE	1	0.403918	5.36369	5.88645	0.522758	0	1.4367	CNAG_06826		Vps72/YL1 C-terminal domain-containing protein	transcription initiation-coupled chromatin remodeling [GO:0045815]	nucleus [GO:0005634]	ATP-dependent H2AZ histone chaperone activity [GO:0140849]
J9W260	WT:uggt	TRUE	0.7	0.6798	-3.25757	-3.13891	0.118657	0	1.08572	CNAG_02009		Extensin
J9VT95	WT:uggt	TRUE	0.2	0.132915	-1.3324	-0.748388	0.584013	0	1.49901	CNAG_06559		Cysteine and glycine-rich protein			metal ion binding [GO:0046872]
J9W1Y1	WT:uggt	TRUE	0.7	0.490609	-4.00366	-3.60822	0.395445	0	1.31535	CNAG_01919		Uncharacterized protein
J9VRQ3	WT:uggt	TRUE	0.1	0.0982353	-0.0988572	-0.3642	-0.265342	0	0.832001	CNAG_02529		N-terminal Ras-GEF domain-containing protein	mitochondrial proton-transporting ATP synthase complex assembly [GO:0033615]	mitochondrial matrix [GO:0005759]	guanyl-nucleotide exchange factor activity [GO:0005085]
J9VN98	WT:uggt	TRUE	0.1	0.00479967	-1.30925	-0.806559	0.502688	0	1.41685	CNAG_03675		Pumilio domain-containing protein	regulation of translation [GO:0006417]	nucleolus [GO:0005730]	mRNA binding [GO:0003729]
J9VH19	WT:uggt	TRUE	0.7	0.709678	-0.729421	-1.18307	-0.453646	0	0.730195	CNAG_02985		Splicing factor YJU2	generation of catalytic spliceosome for first transesterification step [GO:0000349]	U2-type catalytic step 1 spliceosome [GO:0071006]	metal ion binding [GO:0046872]
J9VSW2	WT:uggt	TRUE	1	0.603435	-1.41009	-1.53552	-0.125431	0	0.91673	CNAG_03260		Large subunit ribosomal protein L6	cytoplasmic translation [GO:0002181]	cytosolic large ribosomal subunit [GO:0022625]; mitochondrial large ribosomal subunit [GO:0005762]	rRNA binding [GO:0019843]; structural constituent of ribosome [GO:0003735]
J9VP90	WT:uggt	TRUE	0.7	0.520978	-4.00824	-3.55053	0.457714	0	1.37336	CNAG_05124	SEY1	Protein SEY1	endoplasmic reticulum membrane fusion [GO:0016320]; endoplasmic reticulum organization [GO:0007029]; endoplasmic reticulum tubular network organization [GO:0071786]	endoplasmic reticulum membrane [GO:0005789]	GTP binding [GO:0005525]; GTPase activity [GO:0003924]
J9VFN1	WT:uggt	TRUE	0.4	0.116591	-2.93716	-1.01815	1.91901	0	3.78162	CNAG_00023		Uncharacterized protein
J9VG45	WT:uggt	TRUE	0.1	0.0358858	-1.31015	-2.26136	-0.95121	0	0.517199	CNAG_00180		Ubiquitin carboxyl-terminal hydrolase (EC 3.4.19.12)	ubiquitin-dependent protein catabolic process [GO:0006511]	cytoplasm [GO:0005737]	cysteine-type deubiquitinase activity [GO:0004843]
J9VPI4	WT:uggt	TRUE	0.1	0.0397224	-0.447184	0.0479478	0.495132	0	1.40945	CNAG_07676		RNA helicase (EC 3.6.4.13)	alternative mRNA splicing, via spliceosome [GO:0000380]; nuclear-transcribed mRNA catabolic process, nonsense-mediated decay [GO:0000184]; rRNA processing [GO:0006364]	cytoplasm [GO:0005737]; nucleus [GO:0005634]; ribonucleoprotein complex [GO:1990904]	ATP binding [GO:0005524]; hydrolase activity [GO:0016787]; mRNA 3'-UTR binding [GO:0003730]; ribonucleoprotein complex binding [GO:0043021]; RNA helicase activity [GO:0003724]
Q8X226	WT:uggt	TRUE	0.1	0.0468422	-2.06326	-1.21293	0.850325	0	1.80291	CNAG_07937	CAS1	Probable O-acetyltransferase CAS1 (EC 2.3.1.-) (Capsule synthesis protein 1)	plant-type secondary cell wall biogenesis [GO:0009834]; xylan acetylation [GO:1990937]; xylan biosynthetic process [GO:0045492]; xyloglucan metabolic process [GO:0010411]	Golgi apparatus [GO:0005794]; membrane [GO:0016020]	N-acetylneuraminate 7-O(or 9-O)-acetyltransferase activity [GO:0047186]; oxidoreductase activity [GO:0016491]
J9VX83	WT:uggt	TRUE	0.7	0.40293	1.50741	1.22825	-0.279157	0	0.824072	CNAG_01799		Cytochrome b-c1 complex subunit 8 (Complex III subunit 8)	mitochondrial electron transport, ubiquinol to cytochrome c [GO:0006122]	mitochondrial respiratory chain complex III [GO:0005750]
J9VLP6	WT:uggt	TRUE	0.2	0.0965504	0.635122	1.08992	0.454802	0	1.3706	CNAG_05101		U3 small nucleolar RNA-associated protein 12	maturation of SSU-rRNA [GO:0030490]	Pwp2p-containing subcomplex of 90S preribosome [GO:0034388]; small-subunit processome [GO:0032040]	snoRNA binding [GO:0030515]
J9VE23	WT:uggt	TRUE	0.1	0.0241373	-0.931071	-1.33967	-0.4086	0	0.753354	CNAG_00146		5'/3'-nucleotidase SurE		P-body [GO:0000932]	hydrolase activity [GO:0016787]
J9W1Y7	WT:uggt	TRUE	0.1	0.0370594	0.52028	0.0917167	-0.428563	0	0.743002	CNAG_05596		Nuclear transport factor 2 (NTF-2)	mRNA transport [GO:0051028]; protein import into nucleus [GO:0006606]	cytoplasm [GO:0005737]; nuclear pore central transport channel [GO:0044613]	nuclear import signal receptor activity [GO:0061608]
J9VGP4	WT:uggt	TRUE	0.1	0.0117284	-2.30054	-1.37755	0.922993	0	1.89605	CNAG_03817		Cell growth-regulating nucleolar protein	negative regulation of transcription by RNA polymerase II [GO:0000122]; rRNA processing [GO:0006364]	nucleolus [GO:0005730]	DNA binding [GO:0003677]; metal ion binding [GO:0046872]
J9VRH2	WT:uggt	TRUE	0.7	0.843341	-1.18021	-1.22018	-0.0399712	0	0.972674	CNAG_04321	CFR1	Cell wall chitin catabolism-related protein	conjugation with cellular fusion [GO:0000747]; Golgi to plasma membrane transport [GO:0006893]	exomer complex [GO:0034044]; trans-Golgi network [GO:0005802]	protein dimerization activity [GO:0046983]
J9VX42	WT:uggt	TRUE	0.1	0.140728	-0.845909	-1.1317	-0.285791	0	0.820292	CNAG_01749		S1-like domain-containing protein
J9VTU2	WT:uggt	TRUE	0.1	0.0125166	0.28126	0.823641	0.542381	0	1.45637	CNAG_05696		E2 ubiquitin-conjugating enzyme (EC 2.3.2.23)	protein K48-linked ubiquitination [GO:0070936]	nucleus [GO:0005634]	ATP binding [GO:0005524]; ubiquitin conjugating enzyme activity [GO:0061631]
J9VX17	WT:uggt	TRUE	0.1	0.0418132	-2.47305	-3.1441	-0.67105	0	0.628049	CNAG_05570		Ubiquitin-like domain-containing protein	ubiquitin-dependent protein catabolic process [GO:0006511]	cytosol [GO:0005829]	polyubiquitin modification-dependent protein binding [GO:0031593]
J9W0F1	WT:uggt	TRUE	0.2	0.0791589	-1.60085	-2.10312	-0.502271	0	0.705995	CNAG_04698		Cytoplasmic protein		cytoplasm [GO:0005737]
J9VTV8	WT:uggt	TRUE	0.1	0.0108697	-0.514116	-1.06862	-0.554502	0	0.680892	CNAG_00987		Prefoldin subunit 3	microtubule-based process [GO:0007017]; protein folding [GO:0006457]; tubulin complex assembly [GO:0007021]	cytoplasm [GO:0005737]; prefoldin complex [GO:0016272]	tubulin binding [GO:0015631]
J9VPZ2	WT:uggt	TRUE	1	0.874093	-0.685611	-0.695503	-0.00989162	0	0.993167	CNAG_03311		Hydroxymethylglutaryl-CoA synthase (HMG-CoA synthase) (EC 2.3.3.10) (3-hydroxy-3-methylglutaryl coenzyme A synthase)	acetyl-CoA metabolic process [GO:0006084]; ergosterol biosynthetic process [GO:0006696]; farnesyl diphosphate biosynthetic process, mevalonate pathway [GO:0010142]		hydroxymethylglutaryl-CoA synthase activity [GO:0004421]
J9VP99	WT:uggt	TRUE	0.1	0.161507	-1.67992	-2.11996	-0.440043	0	0.737113	CNAG_05134		Ornithine aminotransferase (EC 2.6.1.13)	arginine catabolic process to glutamate [GO:0019544]; arginine catabolic process to proline via ornithine [GO:0010121]; L-proline biosynthetic process [GO:0055129]	cytoplasm [GO:0005737]	identical protein binding [GO:0042802]; ornithine aminotransferase activity [GO:0004587]; pyridoxal phosphate binding [GO:0030170]
J9VZC5	WT:uggt	TRUE	0.4	0.142921	-3.31557	-2.7684	0.547171	0	1.46122	CNAG_05379		Regucalcin	L-ascorbic acid biosynthetic process [GO:0019853]		calcium ion binding [GO:0005509]; gluconolactonase activity [GO:0004341]
J9VNK1	WT:uggt	TRUE	0.2	0.124613	-1.34005	-0.950917	0.389137	0	1.30961	CNAG_06927		peptidylprolyl isomerase (EC 5.2.1.8)	protein folding [GO:0006457]	cytosol [GO:0005829]; intracellular membrane-bounded organelle [GO:0043231]; plasma membrane [GO:0005886]	peptidyl-prolyl cis-trans isomerase activity [GO:0003755]
J9VFR3	WT:uggt	TRUE	0.4	0.3183	-3.37001	-2.6799	0.690107	0	1.6134	CNAG_03702		Tubulin-folding cofactor B	cytoplasmic microtubule organization [GO:0031122]; establishment of mitotic spindle orientation [GO:0000132]; nuclear migration involved in conjugation with cellular fusion [GO:0000743]	cell tip [GO:0051286]; cytoplasm [GO:0005737]; kinetochore [GO:0000776]; microtubule associated complex [GO:0005875]; microtubule plus-end [GO:0035371]; nucleus [GO:0005634]; spindle pole [GO:0000922]; spindle pole body [GO:0005816]	microtubule plus-end binding [GO:0051010]
J9VT13	WT:uggt	TRUE	0.7	0.380115	-2.54021	-2.2876	0.252604	0	1.19136	CNAG_04622		Endoplasmic reticulum protein		membrane [GO:0016020]
J9VJJ1	WT:uggt	TRUE	0.7	0.782746	3.29907	3.20311	-0.0959522	0	0.935654	CNAG_00655		Large subunit acidic ribosomal protein P1	cytoplasmic translation [GO:0002181]; translational elongation [GO:0006414]	cytosolic large ribosomal subunit [GO:0022625]	protein kinase activator activity [GO:0030295]; ribonucleoprotein complex binding [GO:0043021]; structural constituent of ribosome [GO:0003735]
J9VMP7	WT:uggt	TRUE	0.1	0.0036932	-0.710768	0.104557	0.815325	0	1.75969	CNAG_00809		RNA helicase (EC 3.6.4.13)	cell differentiation [GO:0030154]	cytoplasm [GO:0005737]; nucleus [GO:0005634]	ATP binding [GO:0005524]; hydrolase activity [GO:0016787]; RNA binding [GO:0003723]; RNA helicase activity [GO:0003724]; translation initiation factor activity [GO:0003743]
J9VMK7	WT:uggt	TRUE	0.1	0.00220158	0.462244	-0.125527	-0.587771	0	0.66537	CNAG_02853		Amidophosphoribosyltransferase (ATase) (EC 2.4.2.14) (Glutamine phosphoribosylpyrophosphate amidotransferase)	'de novo' IMP biosynthetic process [GO:0006189]; purine nucleobase biosynthetic process [GO:0009113]	cytoplasm [GO:0005737]	amidophosphoribosyltransferase activity [GO:0004044]; metal ion binding [GO:0046872]
J9W0U6	WT:uggt	TRUE	0.7	0.842974	-1.58541	-1.6245	-0.0390935	0	0.973266	CNAG_06346		Barwin domain-containing protein	defense response to bacterium [GO:0042742]; defense response to fungus [GO:0050832]
J9VTT4	WT:uggt	TRUE	0.1	0.0181939	-2.12481	-1.47345	0.651366	0	1.57065	CNAG_05686		Uncharacterized protein
J9VE65	WT:uggt	TRUE	0.1	0.0107585	-0.620213	-0.785767	-0.165554	0	0.891586	CNAG_00470		Charged multivesicular body protein 1	endosome transport via multivesicular body sorting pathway [GO:0032509]; late endosome to vacuole transport [GO:0045324]; protein transport [GO:0015031]	ESCRT III complex [GO:0000815]; multivesicular body [GO:0005771]
J9VXI8	WT:uggt	TRUE	0.7	0.7358	-0.958873	-0.986334	-0.0274607	0	0.981146	CNAG_03168		Sulfite reductase (NADPH) flavoprotein alpha-component		cytosol [GO:0005829]	flavin adenine dinucleotide binding [GO:0050660]; FMN binding [GO:0010181]; sulfite reductase (NADPH) activity [GO:0004783]
J9W451	WT:uggt	TRUE	0.2	0.0784227	0.548375	0.0961134	-0.452261	0	0.730896	CNAG_05578		Complex I-B15		membrane [GO:0016020]
J9VZL0	WT:uggt	TRUE	0.2	0.18032	-2.85129	-3.88167	-1.03038	0	0.489581	CNAG_01908		uroporphyrinogen-III synthase (EC 4.2.1.75) (Hydroxymethylbilane hydrolyase [cyclizing]) (Uroporphyrinogen-III cosynthase)	protoporphyrinogen IX biosynthetic process [GO:0006782]; uroporphyrinogen III biosynthetic process [GO:0006780]	cytosol [GO:0005829]	uroporphyrinogen-III synthase activity [GO:0004852]
J9VSA0	WT:uggt	TRUE	0.7	0.355538	-1.50064	-1.16435	0.336291	0	1.26251	CNAG_02360		Uncharacterized protein
J9VTM3	WT:uggt	TRUE	0.1	0.00140613	0.00747846	-0.823478	-0.830956	0	0.562156	CNAG_01598		Template-activating factor I	nucleosome assembly [GO:0006334]	chromatin [GO:0000785]; nucleus [GO:0005634]	chromatin binding [GO:0003682]; histone binding [GO:0042393]
J9VQ41	WT:uggt	TRUE	0.4	0.427561	-5.25524	-4.78673	0.468513	0	1.38368	CNAG_01414		Coatomer subunit delta	endoplasmic reticulum to Golgi vesicle-mediated transport [GO:0006888]; Golgi localization [GO:0051645]; protein transport [GO:0015031]; retrograde vesicle-mediated transport, Golgi to endoplasmic reticulum [GO:0006890]	COPI vesicle coat [GO:0030126]; Golgi membrane [GO:0000139]
J9W336	WT:uggt	TRUE	0.1	0.103809	3.28001	4.18154	0.901538	0	1.86806	CNAG_06347		Barwin domain-containing protein
J9VLL7	WT:uggt	TRUE	0.4	0.320787	-3.44242	-2.93053	0.511892	0	1.42592	CNAG_03964		Zinc knuckle family protein		nucleolus [GO:0005730]	nucleic acid binding [GO:0003676]; zinc ion binding [GO:0008270]
J9VR82	WT:uggt	TRUE	0.1	0.0764641	-0.446884	-1.31444	-0.867555	0	0.548075	CNAG_07797		Transcriptional regulator
J9VP01	WT:uggt	TRUE	0.1	0.0078843	-0.387067	0.114036	0.501103	0	1.41529	CNAG_05892		Phosphoglycerate mutase	ribose phosphate biosynthetic process [GO:0046390]		sedoheptulose-bisphosphatase activity [GO:0050278]
J9VMK1	WT:uggt	TRUE	0.1	0.0290076	-3.35296	-2.80245	0.550513	0	1.46461	CNAG_02857		Arrestin C-terminal-like domain-containing protein	ubiquitin-dependent endocytosis [GO:0070086]	cytosol [GO:0005829]; plasma membrane [GO:0005886]	protein-macromolecule adaptor activity [GO:0030674]; ubiquitin protein ligase binding [GO:0031625]
J9VSA9	WT:uggt	TRUE	0.4	0.469674	0.308469	0.475641	0.167172	0	1.12286	CNAG_04869		Carboxylic ester hydrolase (EC 3.1.1.-)			hydrolase activity [GO:0016787]
J9VK39	WT:uggt	TRUE	0.1	0.0237458	-2.12375	-1.42388	0.699866	0	1.62435	CNAG_01310		Nucleolar protein
J9W3C4	WT:uggt	TRUE	0.1	0.0232967	-2.64264	-2.23504	0.407599	0	1.32648	CNAG_06451		Chromatin modification-related protein EAF6	chromatin organization [GO:0006325]; DNA repair [GO:0006281]	NuA4 histone acetyltransferase complex [GO:0035267]; nucleus [GO:0005634]
J9VV65	WT:uggt	TRUE	0.7	0.634321	-1.93158	-2.0498	-0.118221	0	0.921323	CNAG_03248		Rho GTPase activator	regulation of fungal-type cell wall organization [GO:0060237]; signal transduction [GO:0007165]	cell cortex [GO:0005938]	GTPase activator activity [GO:0005096]
Q6URB0	WT:uggt	TRUE	0.2	0.0951433	-1.15735	-0.648459	0.508888	0	1.42295	CNAG_01138	CCP1	Cytochrome c peroxidase, mitochondrial (CCP) (EC 1.11.1.5)	cellular response to oxidative stress [GO:0034599]; hydrogen peroxide catabolic process [GO:0042744]; response to reactive oxygen species [GO:0000302]	mitochondrial intermembrane space [GO:0005758]; mitochondrial matrix [GO:0005759]	cytochrome-c peroxidase activity [GO:0004130]; heme binding [GO:0020037]; metal ion binding [GO:0046872]
J9VY73	WT:uggt	TRUE	1	0.820183	-3.34328	-3.40295	-0.05967	0	0.959484	CNAG_04636		Metacaspase-1	apoptotic process [GO:0006915]; proteolysis [GO:0006508]		cysteine-type endopeptidase activity [GO:0004197]
J9VJ56	WT:uggt	TRUE	0.7	0.997814	-1.62284	-1.62435	-0.00151117	0	0.998953	CNAG_03931		Mitochondrial import receptor subunit TOM40	protein import into mitochondrial matrix [GO:0030150]	mitochondrial outer membrane translocase complex [GO:0005742]	protein transmembrane transporter activity [GO:0008320]
J9VY01	WT:uggt	TRUE	0.7	0.301258	-2.35818	-1.39874	0.959434	0	1.94455	CNAG_03365		Scamp-domain-containing protein	protein transport [GO:0015031]	recycling endosome membrane [GO:0055038]; trans-Golgi network membrane [GO:0032588]
J9W1P4	WT:uggt	TRUE	1	0.658582	-3.32445	-3.17045	0.153999	0	1.11265	CNAG_01819		Ribosomal protein	translation [GO:0006412]	cytosolic large ribosomal subunit [GO:0022625]; mitochondrial large ribosomal subunit [GO:0005762]	RNA binding [GO:0003723]; structural constituent of ribosome [GO:0003735]
J9VUU6	WT:uggt	TRUE	0.7	0.965034	-3.5453	-3.62759	-0.0822914	0	0.944556	CNAG_06009		Cyclohydrolase	riboflavin biosynthetic process [GO:0009231]		GTP binding [GO:0005525]; GTP cyclohydrolase II activity [GO:0003935]
J9W0N0	WT:uggt	TRUE	0.1	0.0129741	-2.3367	-1.41261	0.924083	0	1.89748	CNAG_04605		Sterol-4alpha-carboxylate 3-dehydrogenase (Decarboxylating)	steroid biosynthetic process [GO:0006694]		3-beta-hydroxy-delta5-steroid dehydrogenase activity [GO:0003854]
J9W3X5	WT:uggt	TRUE	1	0.526733	-1.49469	-1.80286	-0.308169	0	0.807666	CNAG_05460		2-dehydropantoate 2-reductase (EC 1.1.1.169) (Ketopantoate reductase)	pantothenate biosynthetic process [GO:0015940]	cytoplasm [GO:0005737]	2-dehydropantoate 2-reductase activity [GO:0008677]
J9VRY1	WT:uggt	TRUE	0.1	0.00945885	-2.69594	-3.13961	-0.443665	0	0.735265	CNAG_04278		DNA ligase (EC 6.5.1.1)	DNA biosynthetic process [GO:0071897]; DNA ligation [GO:0006266]; DNA recombination [GO:0006310]; DNA repair [GO:0006281]; Okazaki fragment processing involved in mitotic DNA replication [GO:1903461]	mitochondrion [GO:0005739]; nucleus [GO:0005634]	ATP binding [GO:0005524]; DNA binding [GO:0003677]; DNA ligase (ATP) activity [GO:0003910]
J9VR53	WT:uggt	TRUE	0.1	0.021224	-0.84939	-1.48759	-0.638198	0	0.642515	CNAG_04180		Large subunit ribosomal protein L15	translation [GO:0006412]	mitochondrial large ribosomal subunit [GO:0005762]	structural constituent of ribosome [GO:0003735]
J9VPI0	WT:uggt	TRUE	1	0.449736	-1.33613	-1.03012	0.306011	0	1.23628	CNAG_02501		Protein phosphatase inhibitor 2	regulation of signal transduction [GO:0009966]		protein phosphatase inhibitor activity [GO:0004864]
J9VVR0	WT:uggt	TRUE	0.7	0.611463	-0.132529	-0.0305086	0.10202	0	1.07328	CNAG_03479		Uncharacterized protein
J9W447	WT:uggt	TRUE	0.1	0.00600908	0.229867	-0.616651	-0.846518	0	0.556125	CNAG_05573		Cytochrome c oxidase assembly protein subunit 17	mitochondrial cytochrome c oxidase assembly [GO:0033617]	mitochondrial intermembrane space [GO:0005758]	copper chaperone activity [GO:0016531]; copper ion binding [GO:0005507]
J9VR46	WT:uggt	TRUE	1	0.592147	0.835098	1.04122	0.206119	0	1.15358	CNAG_04171		Protein ROT1	'de novo' protein folding [GO:0006458]	endoplasmic reticulum membrane [GO:0005789]	unfolded protein binding [GO:0051082]
J9VGA0	WT:uggt	TRUE	0.1	0.0571155	-1.65945	-1.34974	0.309709	0	1.23946	CNAG_03882		6-phosphogluconolactonase			6-phosphogluconolactonase activity [GO:0017057]
J9VQ81	WT:uggt	TRUE	0.1	0.00887668	2.04994	1.17106	-0.878881	0	0.543789	CNAG_02827		Ubiquitin-like protein Nedd8	modification-dependent protein catabolic process [GO:0019941]; protein neddylation [GO:0045116]; regulation of proteolysis [GO:0030162]	cytoplasm [GO:0005737]; nucleus [GO:0005634]	protein tag activity [GO:0031386]; ubiquitin protein ligase binding [GO:0031625]
J9VWF3	WT:uggt	TRUE	0.1	0.0011594	-2.50821	-1.85488	0.653336	0	1.5728	CNAG_05713		Elongator complex protein 1	tRNA wobble base 5-methoxycarbonylmethyl-2-thiouridinylation [GO:0002926]	cytosol [GO:0005829]; elongator holoenzyme complex [GO:0033588]; nucleus [GO:0005634]	tRNA binding [GO:0000049]
J9VPY7	WT:uggt	TRUE	0.7	0.992704	-1.22931	-1.23532	-0.00600931	0	0.995843	CNAG_07408		non-specific serine/threonine protein kinase (EC 2.7.11.1)	intracellular signal transduction [GO:0035556]; regulation of MAPK cascade [GO:0043408]	cytoplasm [GO:0005737]	ATP binding [GO:0005524]; protein serine/threonine kinase activity [GO:0004674]
J9VDA7	WT:uggt	TRUE	0.1	0.0640551	-1.37433	-0.573297	0.801034	0	1.74235	CNAG_00135		Cyclophilin			RNA binding [GO:0003723]
J9VM18	WT:uggt	TRUE	0.1	0.211147	-1.86951	-1.47252	0.396988	0	1.31676	CNAG_02310		Casein kinase II subunit beta (CK II beta)	regulation of transcription by RNA polymerase III [GO:0006359]	cytoplasm [GO:0005737]; protein kinase CK2 complex [GO:0005956]; UTP-C complex [GO:0034456]	kinase activity [GO:0016301]; protein kinase regulator activity [GO:0019887]
J9VK56	WT:uggt	TRUE	0.1	0.00833953	-1.39099	-0.628732	0.762257	0	1.69614	CNAG_01295		Acyl carrier protein		mitochondrial respiratory chain complex I [GO:0005747]	acyl binding [GO:0000035]; acyl carrier activity [GO:0000036]
J9W3Z0	WT:uggt	TRUE	0.7	0.305063	-0.177302	-0.0297776	0.147524	0	1.10767	CNAG_05478		Charged multivesicular body protein 2A	endosome transport via multivesicular body sorting pathway [GO:0032509]; late endosome to vacuole transport [GO:0045324]; protein transport [GO:0015031]	ESCRT III complex [GO:0000815]; multivesicular body [GO:0005771]
J9VHH7	WT:uggt	TRUE	0.1	0.0224909	-0.919913	-0.204938	0.714975	0	1.64145	CNAG_00706		RNA-binding protein rnp24	nuclear mRNA surveillance [GO:0071028]; poly(A)+ mRNA export from nucleus [GO:0016973]	cytoplasm [GO:0005737]; nucleus [GO:0005634]; ribonucleoprotein complex [GO:1990904]	mRNA binding [GO:0003729]
J9VQ89	WT:uggt	TRUE	0.1	0.131221	-2.92835	-3.71715	-0.788796	0	0.578827	CNAG_03418		Exportin-1	protein export from nucleus [GO:0006611]; ribosomal large subunit export from nucleus [GO:0000055]; ribosomal small subunit export from nucleus [GO:0000056]	cytoplasm [GO:0005737]; nucleus [GO:0005634]	nuclear export signal receptor activity [GO:0005049]; small GTPase binding [GO:0031267]
J9VWA9	WT:uggt	TRUE	0.1	0.0318193	-0.296242	-0.729633	-0.43339	0	0.740519	CNAG_05343		Arrestin C-terminal-like domain-containing protein
J9VEH7	WT:uggt	TRUE	0.7	0.58335	0.238505	0.181073	-0.0574329	0	0.960973	CNAG_00270		Mitochondrial pyruvate carrier	mitochondrial pyruvate transmembrane transport [GO:0006850]	mitochondrial inner membrane [GO:0005743]
J9VW88	WT:uggt	TRUE	0.4	0.240435	-0.382338	-0.713294	-0.330956	0	0.79501	CNAG_06274		Uncharacterized protein		mitochondrial inner membrane [GO:0005743]
J9VIR8	WT:uggt	TRUE	0.1	0.076376	-0.319707	-1.16129	-0.841582	0	0.558031	CNAG_00335		Type 2A phosphatase-associated protein 42	regulation of dephosphorylation [GO:0035303]; regulation of signal transduction [GO:0009966]	cytosol [GO:0005829]	protein phosphatase 2A binding [GO:0051721]
J9VUN4	WT:uggt	TRUE	0.1	0.075627	-2.63943	-2.01884	0.620591	0	1.5375	CNAG_02434		Copper chaperone	copper ion transport [GO:0006825]	cytosol [GO:0005829]	copper chaperone activity [GO:0016531]; metal ion binding [GO:0046872]
J9VPJ2	WT:uggt	TRUE	0.7	0.785111	-1.78156	-1.81986	-0.0383056	0	0.973798	CNAG_05859		Uncharacterized protein	protein secretion [GO:0009306]
J9VQP8	WT:uggt	TRUE	0.1	0.02628	-2.61179	-2.13527	0.476518	0	1.39138	CNAG_03368		Microtubule Associated protein	cell division [GO:0051301]; establishment or maintenance of microtubule cytoskeleton polarity [GO:0030951]; microtubule polymerization [GO:0046785]; mitotic spindle organization [GO:0007052]	cytoplasm [GO:0005737]; kinetochore [GO:0000776]; microtubule plus-end [GO:0035371]; spindle pole [GO:0000922]; spindle pole body [GO:0005816]	microtubule plus end polymerase [GO:0061863]; microtubule plus-end binding [GO:0051010]
J9VM73	WT:uggt	TRUE	0.1	0.0338159	-1.15495	-0.387598	0.767352	0	1.70214	CNAG_02993		Solute carrier family 39 (Zinc transporter), member 7	intracellular zinc ion homeostasis [GO:0006882]	membrane [GO:0016020]	zinc ion transmembrane transporter activity [GO:0005385]
J9VGT4	WT:uggt	TRUE	0.1	0.0651747	-3.92167	-2.65482	1.26685	0	2.40635	CNAG_03857		Uncharacterized protein		membrane [GO:0016020]
J9VNW6	WT:uggt	TRUE	0.7	0.656297	1.2388	1.53901	0.300217	0	1.23133	CNAG_06633		Small subunit ribosomal protein S15	ribosomal small subunit assembly [GO:0000028]; translation [GO:0006412]	cytosolic small ribosomal subunit [GO:0022627]	structural constituent of ribosome [GO:0003735]
J9VNX6	WT:uggt	TRUE	0.1	0.00108648	-1.54343	-0.671226	0.872209	0	1.83046	CNAG_06648		RNA polymerase-associated protein RTF1		Cdc73/Paf1 complex [GO:0016593]	DNA binding [GO:0003677]; RNA polymerase II C-terminal domain phosphoserine binding [GO:1990269]
J9VPW0	WT:uggt	TRUE	0.7	0.784779	-3.3903	-3.5065	-0.116196	0	0.922617	CNAG_03276		UPF3 domain-containing protein	nuclear-transcribed mRNA catabolic process, nonsense-mediated decay [GO:0000184]; positive regulation of translation [GO:0045727]	cytoplasm [GO:0005737]; nucleolus [GO:0005730]	mRNA binding [GO:0003729]
J9VTH8	WT:uggt	TRUE	0.1	0.00440673	-1.01132	-0.266188	0.745136	0	1.67613	CNAG_04654		UNC-50 family protein		membrane [GO:0016020]
J9W1N7	WT:uggt	TRUE	0.1	0.00330776	-1.16872	-1.51429	-0.34557	0	0.786997	CNAG_01809		U4/U6 small nuclear ribonucleoprotein PRP3	mRNA splicing, via spliceosome [GO:0000398]	U4/U6 x U5 tri-snRNP complex [GO:0046540]
J9VU34	WT:uggt	TRUE	0.7	0.417545	-1.13618	-1.19988	-0.0636975	0	0.956809	CNAG_01740		Septin	cytoskeleton-dependent cytokinesis [GO:0061640]; regulation of exocytosis [GO:0017157]	cell division site [GO:0032153]; cytosol [GO:0005829]; microtubule cytoskeleton [GO:0015630]; septin complex [GO:0031105]; septin ring [GO:0005940]	GTP binding [GO:0005525]; GTPase activity [GO:0003924]; molecular adaptor activity [GO:0060090]
J9VSG0	WT:uggt	TRUE	0.7	0.228362	-0.147571	-0.633063	-0.485492	0	0.714253	CNAG_04484		Vesicle tethering protein Uso1/P115-like head domain-containing protein	endoplasmic reticulum to Golgi vesicle-mediated transport [GO:0006888]; Golgi vesicle docking [GO:0048211]; intracellular protein transport [GO:0006886]; transcytosis [GO:0045056]; vesicle fusion with Golgi apparatus [GO:0048280]	endoplasmic reticulum [GO:0005783]; ER to Golgi transport vesicle membrane [GO:0012507]; Golgi membrane [GO:0000139]; Golgi stack [GO:0005795]
J9VKA2	WT:uggt	TRUE	1	0.746992	-2.85793	-2.78999	0.0679397	0	1.04822	CNAG_06806		Probable electron transfer flavoprotein subunit alpha	fatty acid beta-oxidation using acyl-CoA dehydrogenase [GO:0033539]	mitochondrial matrix [GO:0005759]	electron transfer activity [GO:0009055]; flavin adenine dinucleotide binding [GO:0050660]
J9VHP7	WT:uggt	TRUE	0.1	0.077436	-3.26793	-2.50548	0.762442	0	1.69636	CNAG_00756		VanZ-like domain-containing protein		intracellular membrane-bounded organelle [GO:0043231]; membrane [GO:0016020]
J9VKR5	WT:uggt	TRUE	0.2	0.119097	-4.05219	-3.24342	0.808772	0	1.75172	CNAG_03699		Pre-mRNA-processing ATP-dependent RNA helicase PRP5 (EC 3.6.4.13) (Pre-mRNA-processing ATP-dependent RNA helicase prp5)			ATP binding [GO:0005524]; hydrolase activity [GO:0016787]; RNA binding [GO:0003723]; RNA helicase activity [GO:0003724]
J9VVZ5	WT:uggt	TRUE	0.7	0.764367	-3.92149	-3.78648	0.135008	0	1.0981	CNAG_03572		Opsin 1		endoplasmic reticulum [GO:0005783]; plasma membrane [GO:0005886]
J9VZH5	WT:uggt	TRUE	0.1	0.00415697	-0.838477	0.0177091	0.856186	0	1.81025	CNAG_01863		ATP-dependent helicase STH1/SNF2	positive regulation of transcription by RNA polymerase II [GO:0045944]	nucleus [GO:0005634]	ATP binding [GO:0005524]; ATP-dependent chromatin remodeler activity [GO:0140658]; DNA binding [GO:0003677]; helicase activity [GO:0004386]; histone binding [GO:0042393]; hydrolase activity [GO:0016787]
J9VLC7	WT:uggt	TRUE	1	0.970004	-2.77461	-2.76929	0.00531992	0	1.00369	CNAG_00346		Type 1 phosphatases regulator		nucleus [GO:0005634]	protein phosphatase 1 binding [GO:0008157]; protein serine/threonine phosphatase inhibitor activity [GO:0004865]
J9VHX5	WT:uggt	TRUE	0.7	0.706393	-1.61544	-1.50981	0.105633	0	1.07597	CNAG_00082		Cytosolic Fe-S cluster assembly factor CFD1	iron-sulfur cluster assembly [GO:0016226]	cytosol [GO:0005829]	4 iron, 4 sulfur cluster binding [GO:0051539]; ATP binding [GO:0005524]; ATP-dependent FeS chaperone activity [GO:0140663]; metal ion binding [GO:0046872]
J9VYI4	WT:uggt	TRUE	0.2	0.0748166	-0.559414	-1.26998	-0.710566	0	0.61108	CNAG_03566		Uncharacterized protein		membrane [GO:0016020]
J9VUL7	WT:uggt	TRUE	0.7	0.463991	-4.60719	-4.45476	0.152422	0	1.11143	CNAG_01973		C2H2 zinc finger protein Zas1A	DNA-templated transcription [GO:0006351]	chromatin [GO:0000785]	DNA-binding transcription factor activity, RNA polymerase II-specific [GO:0000981]; RNA polymerase II cis-regulatory region sequence-specific DNA binding [GO:0000978]; zinc ion binding [GO:0008270]
J9VHV4	WT:uggt	TRUE	0.7	0.748247	-3.37292	-2.92897	0.443953	0	1.36033	CNAG_07513		Uncharacterized protein	5S class rRNA transcription by RNA polymerase III [GO:0042791]; transcription initiation at RNA polymerase III promoter [GO:0006384]	nucleus [GO:0005634]; transcription factor TFIIIC complex [GO:0000127]	DNA binding [GO:0003677]
J9VRK0	WT:uggt	TRUE	0.7	0.340447	-0.952704	-0.647271	0.305433	0	1.23579	CNAG_05703		Rho GTPase activator	regulation of actin filament polymerization [GO:0030833]; regulation of small GTPase mediated signal transduction [GO:0051056]; signal transduction [GO:0007165]	cytoplasm [GO:0005737]	GTPase activator activity [GO:0005096]; metal ion binding [GO:0046872]
J9VRT2	WT:uggt	TRUE	0.1	0.165051	-1.70379	-2.58563	-0.881839	0	0.542675	CNAG_04221		6-phosphofructo-2-kinase/fructose-2, 6-bisphosphatase	fructose 2,6-bisphosphate metabolic process [GO:0006003]; fructose metabolic process [GO:0006000]	cytosol [GO:0005829]	6-phosphofructo-2-kinase activity [GO:0003873]; ATP binding [GO:0005524]; fructose-2,6-bisphosphate 2-phosphatase activity [GO:0004331]
J9VQZ7	WT:uggt	TRUE	0.2	0.0876877	1.42225	0.63847	-0.783778	0	0.580844	CNAG_06546		Uncharacterized protein
J9VZY1	WT:uggt	TRUE	0.1	0.0943618	2.02453	3.89517	1.87064	0	3.65694	CNAG_04891		Ricin B lectin domain-containing protein
J9VMX3	WT:uggt	TRUE	0.7	0.967937	-3.21702	-3.13995	0.0770747	0	1.05488	CNAG_06542		Conserved oligomeric Golgi complex subunit 7 (Component of oligomeric Golgi complex 7)	Golgi organization [GO:0007030]; intracellular protein transport [GO:0006886]; retrograde vesicle-mediated transport, Golgi to endoplasmic reticulum [GO:0006890]	Golgi membrane [GO:0000139]; Golgi transport complex [GO:0017119]
J9VM26	WT:uggt	TRUE	0.2	0.160118	-4.34247	-5.22077	-0.878292	0	0.544011	CNAG_03046		Small RNA 2'-O-methyltransferase (EC 2.1.1.386)	piRNA processing [GO:0034587]; RNA methylation [GO:0001510]; siRNA processing [GO:0030422]	cytoplasm [GO:0005737]; nucleus [GO:0005634]	O-methyltransferase activity [GO:0008171]; RNA methyltransferase activity [GO:0008173]
J9W0F5	WT:uggt	TRUE	0.1	0.151431	-1.75415	-2.36335	-0.609208	0	0.655557	CNAG_06191		N-acetyl-D-glucosamine kinase
J9VFW5	WT:uggt	TRUE	0.7	0.794636	-0.478962	-0.315141	0.163821	0	1.12025	CNAG_07386		Uncharacterized protein
J9VNQ3	WT:uggt	TRUE	0.2	0.132562	-2.15943	-1.60377	0.555653	0	1.46983	CNAG_03824		Solute carrier family 25 (Mitochondrial phosphate transporter), member 3	mitochondrial phosphate ion transmembrane transport [GO:1990547]	mitochondrial inner membrane [GO:0005743]	phosphate transmembrane transporter activity [GO:0005315]
J9VVK7	WT:uggt	TRUE	0.1	0.00171333	-0.713983	0.0209389	0.734922	0	1.66431	CNAG_06985		beta-glucosidase (EC 3.2.1.21)	cellulose catabolic process [GO:0030245]		beta-glucosidase activity [GO:0008422]; scopolin beta-glucosidase activity [GO:0102483]
J9VXY5	WT:uggt	TRUE	0.1	0.137563	-1.67102	-0.974832	0.696186	0	1.62022	CNAG_03349		Pre-mRNA-processing factor 17	mRNA splicing, via spliceosome [GO:0000398]	catalytic step 2 spliceosome [GO:0071013]	mRNA binding [GO:0003729]
J9VGY0	WT:uggt	TRUE	0.7	0.807517	-0.403521	-0.484473	-0.0809524	0	0.945433	CNAG_00495		Mss4-like protein	post-Golgi vesicle-mediated transport [GO:0006892]; protein transport [GO:0015031]; small GTPase-mediated signal transduction [GO:0007264]	cytosol [GO:0005829]; membrane [GO:0016020]	guanyl-nucleotide exchange factor activity [GO:0005085]; zinc ion binding [GO:0008270]
T2BQU2	WT:uggt	TRUE	0.1	0.0197848	-0.653905	-1.60452	-0.950619	0	0.51741	CNAG_03863		Protein arginine N-methyltransferase 1, variant	methylation [GO:0032259]	nucleus [GO:0005634]	protein-arginine N-methyltransferase activity [GO:0016274]
J9VHG6	WT:uggt	TRUE	1	0.417613	-0.457499	-0.667716	-0.210218	0	0.864407	CNAG_00697		UDP-glucose 4-epimerase (EC 5.1.3.2)	galactose catabolic process via UDP-galactose [GO:0033499]	cytosol [GO:0005829]; membrane [GO:0016020]	UDP-glucose 4-epimerase activity [GO:0003978]
J9VLM7	WT:uggt	TRUE	0.1	0.000361878	-3.70718	-3.16964	0.537541	0	1.4515	CNAG_00989		Ubiquitin carboxyl-terminal hydrolase (EC 3.4.19.12)	ubiquitin-dependent protein catabolic process [GO:0006511]	cytoplasm [GO:0005737]	cysteine-type deubiquitinase activity [GO:0004843]
J9VZN9	WT:uggt	TRUE	0.1	0.0388192	1.96715	0.969704	-0.997442	0	0.500887	CNAG_05461		L-lactate dehydrogenase (Cytochrome)		membrane [GO:0016020]	oxidoreductase activity [GO:0016491]
J9VYC3	WT:uggt	TRUE	0.7	0.332096	-1.6069	-1.77992	-0.17302	0	0.886984	CNAG_06179		Cytoplasmic protein		membrane [GO:0016020]; mitochondrion [GO:0005739]
J9VI31	WT:uggt	TRUE	0.7	0.651114	-2.69634	-2.6303	0.066031	0	1.04683	CNAG_06754		RNA polymerase-associated protein CTR9	regulation of DNA-templated transcription [GO:0006355]; transcription elongation by RNA polymerase II [GO:0006368]	Cdc73/Paf1 complex [GO:0016593]	RNA polymerase II complex binding [GO:0000993]
J9VL27	WT:uggt	TRUE	0.2	0.261499	-2.48266	-2.95801	-0.475352	0	0.719291	CNAG_07435		Transcriptional activator HAP2		CCAAT-binding factor complex [GO:0016602]	DNA binding [GO:0003677]; DNA-binding transcription factor activity, RNA polymerase II-specific [GO:0000981]
J9VHC9	WT:uggt	TRUE	0.1	0.113455	-1.64544	-1.21578	0.429661	0	1.34692	CNAG_04078		Oligosaccharyltransferase complex subunit gamma	protein N-linked glycosylation via asparagine [GO:0018279]	oligosaccharyltransferase complex [GO:0008250]	transferase activity [GO:0016740]
J9VP56	WT:uggt	TRUE	0.1	0.00385832	-2.0812	-1.26857	0.812629	0	1.75641	CNAG_07689		Pre-mRNA-splicing factor CWC22	mRNA splicing, via spliceosome [GO:0000398]	catalytic step 2 spliceosome [GO:0071013]	RNA binding [GO:0003723]
J9VSN6	WT:uggt	TRUE	0.2	0.0850168	-0.346068	0.0972486	0.443316	0	1.35973	CNAG_01402		Actin-related protein 3	Arp2/3 complex-mediated actin nucleation [GO:0034314]	actin cortical patch [GO:0030479]; Arp2/3 protein complex [GO:0005885]	actin filament binding [GO:0051015]
J9VM88	WT:uggt	TRUE	0.7	0.779276	-3.24785	-3.12062	0.127226	0	1.09219	CNAG_00676		Vacuolar protein sorting-associated protein 28 (ESCRT-I complex subunit VPS28)	protein transport to vacuole involved in ubiquitin-dependent protein catabolic process via the multivesicular body sorting pathway [GO:0043328]	ESCRT I complex [GO:0000813]	protein-containing complex binding [GO:0044877]
J9VXK0	WT:uggt	TRUE	1	0.996598	-3.73952	-3.74167	-0.00214673	0	0.998513	CNAG_01946		Allantoate permease		membrane [GO:0016020]	transmembrane transporter activity [GO:0022857]
J9VEI9	WT:uggt	TRUE	0.2	0.164392	-2.34196	-1.67881	0.663148	0	1.58353	CNAG_00624		ER membrane protein complex subunit 2	protein folding in endoplasmic reticulum [GO:0034975]	EMC complex [GO:0072546]
J9VLS3	WT:uggt	TRUE	0.1	0.0399189	-2.96625	-2.13703	0.829221	0	1.77673	CNAG_05111		Uncharacterized protein
T2BQM8	WT:uggt	TRUE	0.2	0.11512	-1.70098	-2.10425	-0.403269	0	0.756143	CNAG_00732		BZIP domain-containing protein			DNA-binding transcription factor activity [GO:0003700]
J9W026	WT:uggt	TRUE	1	0.760251	-2.34508	-2.44006	-0.0949794	0	0.936286	CNAG_05645		COP9 signalosome complex subunit 3	ubiquitin-dependent protein catabolic process [GO:0006511]	COP9 signalosome [GO:0008180]; cytoplasm [GO:0005737]
J9VJD1	WT:uggt	TRUE	0.1	0.011562	-1.61683	-0.712588	0.904244	0	1.87156	CNAG_04016		Protein rds1
J9VSB2	WT:uggt	TRUE	0.7	0.36526	-2.26513	-1.79238	0.472751	0	1.38775	CNAG_04433		CMGC/DYRK/DYRK2 protein kinase		cytoplasm [GO:0005737]; cytoskeleton [GO:0005856]; nucleus [GO:0005634]	ATP binding [GO:0005524]; protein serine/threonine kinase activity [GO:0004674]
J9VQ05	WT:uggt	TRUE	0.7	0.611591	-0.151933	-0.435984	-0.28405	0	0.821282	CNAG_02906		E2 ubiquitin-conjugating enzyme (EC 2.3.2.23)			ATP binding [GO:0005524]; ubiquitin conjugating enzyme activity [GO:0061631]
J9VLV7	WT:uggt	TRUE	0.1	0.0407436	-1.13862	-1.96255	-0.823928	0	0.564902	CNAG_04079		HAT1-interacting factor 1	CENP-A containing chromatin assembly [GO:0034080]; DNA replication-dependent chromatin assembly [GO:0006335]	nucleoplasm [GO:0005654]	histone binding [GO:0042393]
J9VI58	WT:uggt	TRUE	0.1	0.0218958	-2.30243	-1.86374	0.43869	0	1.35537	CNAG_06723		Succinate dehydrogenase [ubiquinone] cytochrome b small subunit	mitochondrial electron transport, succinate to ubiquinone [GO:0006121]; protein insertion into mitochondrial inner membrane [GO:0045039]; tricarboxylic acid cycle [GO:0006099]	mitochondrial respiratory chain complex II, succinate dehydrogenase complex (ubiquinone) [GO:0005749]; TIM22 mitochondrial import inner membrane insertion complex [GO:0042721]	heme binding [GO:0020037]; protein transmembrane transporter activity [GO:0008320]; succinate dehydrogenase (quinone) activity [GO:0008177]; ubiquinone binding [GO:0048039]
J9VSB8	WT:uggt	TRUE	0.7	0.386189	-2.58814	-2.99052	-0.402378	0	0.75661	CNAG_04438		Mini-chromosome maintenance complex-binding protein	DNA-templated DNA replication [GO:0006261]	nucleus [GO:0005634]	chromatin binding [GO:0003682]
J9VDT0	WT:uggt	TRUE	0.1	0.0570691	-1.77557	-1.26236	0.513209	0	1.42722	CNAG_00055		BZIP domain-containing protein			DNA-binding transcription factor activity [GO:0003700]
J9VP07	WT:uggt	TRUE	0.7	0.360104	-1.76085	-1.3012	0.459644	0	1.3752	CNAG_06686		FAM192A/Fyv6 N-terminal domain-containing protein		nucleus [GO:0005634]
J9VTX5	WT:uggt	TRUE	0.1	0.00480014	-3.22857	-2.2957	0.932868	0	1.90907	CNAG_00967		Endoplasmic reticulum protein		membrane [GO:0016020]
J9VQE1	WT:uggt	TRUE	0.7	0.545486	-1.74704	-1.89966	-0.152626	0	0.899612	CNAG_03232		Lactamase
J9VJR2	WT:uggt	TRUE	0.7	0.329402	-1.60126	-1.14962	0.45164	0	1.36759	CNAG_00719		Ribosome biogenesis ATPase	ribosome biogenesis [GO:0042254]	nucleus [GO:0005634]	ATP binding [GO:0005524]; ATP hydrolysis activity [GO:0016887]; preribosome binding [GO:1990275]; RNA binding [GO:0003723]
J9VLG5	WT:uggt	TRUE	0.1	0.00756766	-1.0895	-0.34186	0.747642	0	1.67905	CNAG_02505		Cardiolipin-specific phospholipase	cardiolipin acyl-chain remodeling [GO:0035965]; lipid homeostasis [GO:0055088]; phosphatidic acid biosynthetic process [GO:0006654]	lipid droplet [GO:0005811]; mitochondrial inner membrane [GO:0005743]	lysophosphatidic acid acyltransferase activity [GO:0042171]; phospholipase A2 activity [GO:0004623]
J9VE30	WT:uggt	TRUE	0.1	0.000298621	-3.03148	-2.30659	0.724893	0	1.65278	CNAG_00424		choline-phosphate cytidylyltransferase (EC 2.7.7.15)		nuclear envelope [GO:0005635]	choline-phosphate cytidylyltransferase activity [GO:0004105]; phosphatidylcholine binding [GO:0031210]
J9VVW6	WT:uggt	TRUE	0.1	0.00863756	0.911418	-0.0237187	-0.935137	0	0.522993	CNAG_06151		Osomolarity two-component system, phosphorelay intermediate protein YPD1	phosphorelay signal transduction system [GO:0000160]	cytoplasm [GO:0005737]; nucleus [GO:0005634]	histidine phosphotransfer kinase activity [GO:0009927]; protein histidine kinase binding [GO:0043424]
J9VK83	WT:uggt	TRUE	0.1	0.0271504	-0.43647	-0.983971	-0.547501	0	0.684204	CNAG_01270		W2 domain-containing protein		cytoplasm [GO:0005737]; membrane [GO:0016020]
T2BPC0	WT:uggt	TRUE	0.1	0.0558227	-0.912342	-1.74502	-0.832682	0	0.561485	CNAG_03281		Glycine-rich RNA binding protein, variant 1			RNA binding [GO:0003723]
J9VKJ9	WT:uggt	TRUE	0.1	0.0726572	-1.83002	-1.24989	0.580135	0	1.49499	CNAG_01371		RGS domain-containing protein	protein localization [GO:0008104]	mitochondrion [GO:0005739]; plasma membrane [GO:0005886]
J9VQ52	WT:uggt	TRUE	0.1	0.0184925	-1.51172	-2.35918	-0.847457	0	0.555764	CNAG_02861		Histidinol-phosphatase (HolPase) (EC 3.1.3.15)	amino acid biosynthetic process [GO:0008652]; histidine biosynthetic process [GO:0000105]	cytoplasm [GO:0005737]	histidinol-phosphatase activity [GO:0004401]
J9VV41	WT:uggt	TRUE	0.1	0.0674657	-4.33653	-2.83996	1.49656	0	2.8217	CNAG_07720		Presequence translocated-associated motor subunit PAM17	protein import into mitochondrial matrix [GO:0030150]	PAM complex, Tim23 associated import motor [GO:0001405]
J9W0Z7	WT:uggt	TRUE	1	0.652246	-1.95662	-2.19123	-0.234614	0	0.849912	CNAG_06406		Uncharacterized protein	protein O-linked glycosylation [GO:0006493]		protein O-acetylglucosaminyltransferase activity [GO:0097363]
J9VTB9	WT:uggt	TRUE	0.1	0.0790496	-0.253589	-1.10279	-0.849201	0	0.555092	CNAG_01198		Sm protein F	spliceosomal snRNP assembly [GO:0000387]	catalytic step 2 spliceosome [GO:0071013]; pICln-Sm protein complex [GO:0034715]; U1 snRNP [GO:0005685]	RNA binding [GO:0003723]
J9VL86	WT:uggt	TRUE	0.7	0.378335	-2.93497	-3.32044	-0.385472	0	0.765529	CNAG_01142		Endoplasmic reticulum protein	lipid transport [GO:0006869]	endoplasmic reticulum [GO:0005783]; membrane [GO:0016020]	lipid binding [GO:0008289]
J9VXT6	WT:uggt	TRUE	0.2	0.0712454	-1.0327	-1.76626	-0.733568	0	0.601415	CNAG_05652		Cytoplasmic protein	glucan catabolic process [GO:0009251]	cell surface [GO:0009986]; extracellular region [GO:0005576]	beta-glucosidase activity [GO:0008422]; glucan endo-1,6-beta-glucosidase activity [GO:0046557]
J9VFT5	WT:uggt	TRUE	0.1	0.0168626	-1.64606	-1.03248	0.613577	0	1.53005	CNAG_03726		Tetratricopeptide repeat protein 39B	cilium assembly [GO:0060271]; otolith morphogenesis [GO:0032474]	cytosol [GO:0005829]; mitochondrial outer membrane [GO:0005741]; nucleus [GO:0005634]
J9VRQ7	WT:uggt	TRUE	1	0.67573	-2.10246	-2.29825	-0.195789	0	0.873095	CNAG_05110		Small subunit ribosomal protein S13	translation [GO:0006412]	cytosol [GO:0005829]; mitochondrion [GO:0005739]; small ribosomal subunit [GO:0015935]	RNA binding [GO:0003723]; structural constituent of ribosome [GO:0003735]
J9VUP9	WT:uggt	TRUE	0.1	0.0303374	-1.56719	-2.35595	-0.788758	0	0.578842	CNAG_01764		Cytoplasmic protein	glutathione metabolic process [GO:0006749]	cytosol [GO:0005829]	5-oxoprolinase (ATP-hydrolyzing) activity [GO:0017168]
J9VGU8	WT:uggt	TRUE	1	0.411987	-0.644881	-0.948301	-0.30342	0	0.810329	CNAG_03873		SMP domain-containing protein
J9VSK2	WT:uggt	TRUE	1	0.675101	-2.55971	-2.44746	0.112246	0	1.08091	CNAG_04809		COP9 signalosome complex subunit 5	protein deneddylation [GO:0000338]	COP9 signalosome [GO:0008180]; cytoplasm [GO:0005737]	deNEDDylase activity [GO:0019784]; metallopeptidase activity [GO:0008237]
J9VHN6	WT:uggt	TRUE	0.4	0.349818	-2.81201	-3.24394	-0.431929	0	0.74127	CNAG_02775	BIM1 CBI1 X325	Copper acquisition factor BIM1 (BCS-inducible membrane protein 1) (Copper binding and release protein 1) (Lytic polysaccharide monooxygenase-like protein BIM1) (LPMO-like protein BIM1) (X325 family protein BIM1)		plasma membrane [GO:0005886]; side of membrane [GO:0098552]	metal ion binding [GO:0046872]
J9VIF9	WT:uggt	TRUE	0.4	0.209518	-4.65955	-3.85383	0.805716	0	1.74801	CNAG_07800		Syntaxin-binding protein 1	intracellular protein transport [GO:0006886]; vesicle docking involved in exocytosis [GO:0006904]	plasma membrane [GO:0005886]; secretory granule [GO:0030141]	syntaxin-1 binding [GO:0017075]
J9VQL1	WT:uggt	TRUE	0.1	0.00229011	-0.303993	-0.824023	-0.52003	0	0.697357	CNAG_03542		Arginase (EC 3.5.3.1)	arginine catabolic process to ornithine [GO:0019547]; urea cycle [GO:0000050]	cytosol [GO:0005829]; nucleus [GO:0005634]	arginase activity [GO:0004053]; manganese ion binding [GO:0030145]
T2BPA6	WT:uggt	TRUE	0.1	0.13916	-2.72631	-3.11559	-0.389287	0	0.763507	CNAG_07965		NAD binding dehydrogenase			nucleotide binding [GO:0000166]
J9VPH4	WT:uggt	TRUE	0.1	0.0219149	0.197298	0.841869	0.644571	0	1.56327	CNAG_02506		3,4-dihydroxy-2-butanone 4-phosphate synthase (DHBP synthase) (EC 4.1.99.12)	riboflavin biosynthetic process [GO:0009231]	cytosol [GO:0005829]	3,4-dihydroxy-2-butanone-4-phosphate synthase activity [GO:0008686]; metal ion binding [GO:0046872]
J9VG98	WT:uggt	TRUE	0.2	0.0688169	-2.82179	-2.37293	0.448855	0	1.36496	CNAG_03658		Uncharacterized protein
J9VVN9	WT:uggt	TRUE	0.2	0.244902	-1.54677	-1.13606	0.410706	0	1.32934	CNAG_06103	VTS1	RNA-binding protein VTS1	nuclear-transcribed mRNA poly(A) tail shortening [GO:0000289]; regulation of translation [GO:0006417]	cytosol [GO:0005829]; P-body [GO:0000932]	mRNA binding [GO:0003729]
J9W465	WT:uggt	TRUE	0.1	0.0700658	-3.98586	-4.82328	-0.83742	0	0.559643	CNAG_05597		Adenylate kinase isoenzyme 6 homolog (AK6) (EC 2.7.4.3) (Dual activity adenylate kinase/ATPase) (AK/ATPase)	ribosomal small subunit biogenesis [GO:0042274]; rRNA processing [GO:0006364]	cytoplasm [GO:0005737]; nucleus [GO:0005634]	adenylate kinase activity [GO:0004017]; ATP binding [GO:0005524]; ATP hydrolysis activity [GO:0016887]; translation initiation factor activity [GO:0003743]
J9VPP3	WT:uggt	TRUE	0.7	0.252803	-2.14414	-2.98793	-0.843783	0	0.557181	CNAG_05913		Alpha-glucosidase	amino acid transport [GO:0006865]; maltose catabolic process [GO:0000025]; sucrose catabolic process [GO:0005987]		alpha-amylase activity [GO:0004556]; glucan 1,4-alpha-maltotriohydrolase activity [GO:0033934]; maltose alpha-glucosidase activity [GO:0032450]; oligo-1,6-glucosidase activity [GO:0004574]; sucrose alpha-glucosidase activity [GO:0004575]
J9W1H3	WT:uggt	TRUE	0.1	0.0684651	0.111632	0.960129	0.848496	0	1.80062	CNAG_01701		Integral membrane protein		membrane [GO:0016020]
J9VRR9	WT:uggt	TRUE	0.7	0.803562	-0.455454	-0.614844	-0.15939	0	0.895404	CNAG_04452		Small ribosomal subunit protein bS18m	mitochondrial translation [GO:0032543]	mitochondrial small ribosomal subunit [GO:0005763]	small ribosomal subunit rRNA binding [GO:0070181]; structural constituent of ribosome [GO:0003735]
J9VLA1	WT:uggt	TRUE	0.7	0.743763	-2.0248	-1.96191	0.0628893	0	1.04456	CNAG_00311		3-hydroxyisobutyryl-CoA hydrolase (EC 3.1.2.4)	valine catabolic process [GO:0006574]	cytosol [GO:0005829]; mitochondrion [GO:0005739]	3-hydroxyisobutyryl-CoA hydrolase activity [GO:0003860]; hydrolase activity [GO:0016787]
J9VL69	WT:uggt	TRUE	0.7	0.307526	-1.16035	-1.47963	-0.319276	0	0.801472	CNAG_00277		Uncharacterized protein
J9VU41	WT:uggt	TRUE	1	0.451157	-3.19489	-3.71169	-0.516801	0	0.69892	CNAG_01583		Vacuolar-sorting protein SNF7 (Vacuolar protein-sorting-associated protein 32)	late endosome to vacuole transport via multivesicular body sorting pathway [GO:0032511]; vesicle budding from membrane [GO:0006900]	cytoplasmic side of plasma membrane [GO:0009898]; ESCRT III complex [GO:0000815]; multivesicular body [GO:0005771]
J9VLK5	WT:uggt	TRUE	0.4	0.266259	-2.82962	-2.36745	0.462174	0	1.37762	CNAG_01014		C2H2-type domain-containing protein			DNA-binding transcription factor activity, RNA polymerase II-specific [GO:0000981]; RNA polymerase II cis-regulatory region sequence-specific DNA binding [GO:0000978]
J9VSR9	WT:uggt	TRUE	0.7	0.735081	-2.26488	-1.98159	0.283289	0	1.21697	CNAG_04737		Sulfatase-modifying factor enzyme domain-containing protein	methylation [GO:0032259]		methyltransferase activity [GO:0008168]; oxidoreductase activity [GO:0016491]
J9VS09	WT:uggt	TRUE	1	0.445635	-2.23767	-1.94047	0.297206	0	1.22876	CNAG_05225		Bud site selection protein 31	mRNA splicing, via spliceosome [GO:0000398]	spliceosomal complex [GO:0005681]
J9VKV2	WT:uggt	TRUE	1	0.590266	-2.01228	-2.23235	-0.220069	0	0.858524	CNAG_01045		Nucleoporin NDC1	mRNA transport [GO:0051028]; nuclear pore organization [GO:0006999]; protein transport [GO:0015031]; spindle pole body localization [GO:0070631]	nuclear membrane [GO:0031965]; nuclear pore transmembrane ring [GO:0070762]; spindle pole body [GO:0005816]	spindle pole body-nuclear membrane anchor activity [GO:0106166]
J9VNP4	WT:uggt	TRUE	0.1	0.0404253	-1.79227	-2.11831	-0.326043	0	0.797721	CNAG_05767		Nitrogen regulatory protein areA GATA-like domain-containing protein	cellular response to glucose starvation [GO:0042149]; protein catabolic process in the vacuole [GO:0007039]	vacuole [GO:0005773]
J9W214	WT:uggt	TRUE	0.7	0.359524	-2.24905	-1.91738	0.331667	0	1.25847	CNAG_05633		Complex III subunit 9	mitochondrial electron transport, ubiquinol to cytochrome c [GO:0006122]	mitochondrial respiratory chain complex III [GO:0005750]
T2BPR6	WT:uggt	TRUE	0.1	0.0588529	-2.35175	-2.80481	-0.453065	0	0.730489	CNAG_08002	VPS54	Vacuolar protein sorting-associated protein 54 C-terminal domain-containing protein	Golgi to vacuole transport [GO:0006896]; protein transport [GO:0015031]; retrograde transport, endosome to Golgi [GO:0042147]	cytosol [GO:0005829]; GARP complex [GO:0000938]	syntaxin binding [GO:0019905]
J9W2V9	WT:uggt	TRUE	0.1	0.0001703	-2.53717	-3.47429	-0.937122	0	0.522274	CNAG_06242		High-affinity iron permease CaFTR1		high-affinity iron permease complex [GO:0033573]	ferrous iron transmembrane transporter activity [GO:0015093]
J9VPI2	WT:uggt	TRUE	0.1	0.114266	-1.77124	-1.93273	-0.16149	0	0.894101	CNAG_07498		Uncharacterized protein
J9VD30	WT:uggt	TRUE	0.1	0.00936334	-0.831099	-1.64491	-0.813809	0	0.568878	CNAG_00044		Ribosome assembly protein 1	cytosolic ribosome assembly [GO:0042256]	cytosol [GO:0005829]; ribonucleoprotein complex [GO:1990904]	GTP binding [GO:0005525]; GTPase activity [GO:0003924]; ribosome binding [GO:0043022]; translation elongation factor activity [GO:0003746]
J9VIH2	WT:uggt	TRUE	0.1	0.0181027	-1.88818	-2.81284	-0.924663	0	0.526804	CNAG_03706		Serine/threonine-protein phosphatase (EC 3.1.3.16)	chromosome segregation [GO:0007059]; regulation of mitotic cell cycle [GO:0007346]	cytoplasm [GO:0005737]; nucleus [GO:0005634]	myosin phosphatase activity [GO:0017018]
J9VQ27	WT:uggt	TRUE	0.7	0.571275	-2.1897	-2.38816	-0.19846	0	0.87148	CNAG_02886		Proteasome subunit beta	proteasome-mediated ubiquitin-dependent protein catabolic process [GO:0043161]	cytosol [GO:0005829]; nucleus [GO:0005634]; proteasome core complex, beta-subunit complex [GO:0019774]
J9VUX2	WT:uggt	TRUE	1	0.722412	-1.137	-1.01833	0.118678	0	1.08574	CNAG_02328		Pre-rRNA-processing protein TSR1	endonucleolytic cleavage of tricistronic rRNA transcript (SSU-rRNA, 5.8S rRNA, LSU-rRNA) [GO:0000479]; maturation of SSU-rRNA from tricistronic rRNA transcript (SSU-rRNA, 5.8S rRNA, LSU-rRNA) [GO:0000462]	nucleolus [GO:0005730]; preribosome, small subunit precursor [GO:0030688]	GTP binding [GO:0005525]; GTPase activity [GO:0003924]; U3 snoRNA binding [GO:0034511]
J9VFA5	WT:uggt	TRUE	0.1	1.28294e-05	0.905655	-1.09117	-1.99683	1	0.250551	CNAG_06778		Serine-threonine kinase receptor-associated protein	spliceosomal snRNP assembly [GO:0000387]	SMN complex [GO:0032797]	kinase activity [GO:0016301]; RNA binding [GO:0003723]
J9W0K1	WT:uggt	TRUE	0.1	9.60723e-06	6.15771	4.55203	-1.60568	1	0.32858	CNAG_04640		ATP-citrate synthase (EC 2.3.3.8) (ATP-citrate (pro-S-)-lyase) (Citrate cleavage enzyme)	acetyl-CoA biosynthetic process [GO:0006085]; citrate metabolic process [GO:0006101]; fatty acid biosynthetic process [GO:0006633]	cytosol [GO:0005829]	ATP binding [GO:0005524]; ATP citrate synthase activity [GO:0003878]; metal ion binding [GO:0046872]
J9VQJ0	WT:uggt	TRUE	0.1	3.91425e-06	0.614591	-0.732338	-1.34693	1	0.393128	CNAG_03297		Histone acetyltransferase type B subunit 2	chromatin remodeling [GO:0006338]; regulation of DNA-templated transcription [GO:0006355]	cytoplasm [GO:0005737]; ESC/E(Z) complex [GO:0035098]; NuRD complex [GO:0016581]; Rpd3L complex [GO:0033698]; Rpd3L-Expanded complex [GO:0070210]	histone binding [GO:0042393]; nucleosome binding [GO:0031491]; transferase activity [GO:0016740]
J9VYP5	WT:uggt	TRUE	0.1	0.00116479	2.86912	0.915144	-1.95397	1	0.258104	CNAG_06314	ADE57	Bifunctional purine biosynthetic protein ADE5,7 [Includes: Phosphoribosylamine--glycine ligase (EC 6.3.4.13) (Glycinamide ribonucleotide synthetase) (GAR synthetase) (GARS) (Phosphoribosylglycinamide synthetase); Phosphoribosylformylglycinamidine cyclo-ligase (EC 6.3.3.1) (AIR synthase) (AIR synthetase) (AIRS) (Phosphoribosyl-aminoimidazole synthetase)]	'de novo' IMP biosynthetic process [GO:0006189]; adenine biosynthetic process [GO:0046084]	cytosol [GO:0005829]	ATP binding [GO:0005524]; metal ion binding [GO:0046872]; phosphoribosylamine-glycine ligase activity [GO:0004637]; phosphoribosylformylglycinamidine cyclo-ligase activity [GO:0004641]
J9VHW3	WT:uggt	TRUE	0.1	7.47161e-06	4.12892	2.99138	-1.13753	1	0.454536	CNAG_00072	RAD51	protein disulfide-isomerase (EC 5.3.4.1)	protein folding [GO:0006457]	endoplasmic reticulum [GO:0005783]	protein disulfide isomerase activity [GO:0003756]
J9VHK8	WT:uggt	TRUE	0.1	1.8221e-07	3.37869	1.32407	-2.05461	1	0.240713	CNAG_00741		RNA helicase (EC 3.6.4.13)	mRNA export from nucleus [GO:0006406]; mRNA splicing, via spliceosome [GO:0000398]		ATP binding [GO:0005524]; hydrolase activity [GO:0016787]; RNA binding [GO:0003723]; RNA helicase activity [GO:0003724]
J9VVE7	WT:uggt	TRUE	0.1	0.000108257	5.07652	3.71922	-1.3573	1	0.390312	CNAG_02129		Uncharacterized protein
J9VGR3	WT:uggt	TRUE	0.1	0.000186342	2.95833	1.71733	-1.241	1	0.42308	CNAG_04082		proline--tRNA ligase (EC 6.1.1.15) (Prolyl-tRNA synthetase)	prolyl-tRNA aminoacylation [GO:0006433]	aminoacyl-tRNA synthetase multienzyme complex [GO:0017101]; cytoplasm [GO:0005737]	aminoacyl-tRNA editing activity [GO:0002161]; ATP binding [GO:0005524]; proline-tRNA ligase activity [GO:0004827]
J9VI21	WT:uggt	TRUE	0.1	0.000355259	-0.0288597	-1.04973	-1.02087	1	0.49282	CNAG_07571		MHD domain-containing protein	septin cytoskeleton organization [GO:0032185]	cell division site [GO:0032153]; endocytic vesicle [GO:0030139]; plasma membrane [GO:0005886]
J9VGY4	WT:uggt	TRUE	0.1	1.36657e-05	2.68191	1.09641	-1.5855	1	0.33321	CNAG_00500		Protein phosphatase		nucleoplasm [GO:0005654]	metal ion binding [GO:0046872]; protein serine/threonine phosphatase activity [GO:0004722]
J9VTU7	WT:uggt	TRUE	0.1	0.00661229	5.0318	3.49057	-1.54124	1	0.343591	CNAG_05701	TPM1	Actin lateral binding protein
[truncated: 682 more rows]

## Sheet: WCL
Table S3 - List of proteins identified in the proteomic analysis of the wild type (WT) and ugg1Δ extracellular vesicles (EVs) and whole-cell lysates (WCL)
[truncated: 4,679 more rows]
