# Supplementary material for: Evolutionary unique N-glycan-dependent protein quality control system plays pivotal roles in cellular fitness and extracellular vesicle transport in Cryptococcus neoformans
Source: eLife. 2025 May 27;13:RP103729. doi: 10.7554/eLife.103729 (PMC12113280; doi:10.7554/eLife.103729)
Supplement: Figure 8—source data 2. [file elife-103729-fig8-data2.xlsx]

## Sheet: WCL
List of proteins identified in the whole-cell lysate (WLC) proteome and secretome analysis in the wild type (WT) and ugg1Δ strains
protein	comparison	True	Levene_P	ttest_P	Class1	Class2	Difference	id	Fold change	Gene locus	Gene ID	Protein	BP	CC	MF
J9VSP0	WT:uggt	TRUE	0.1	0.014876	24.5126	25.1032	0.590578	0	1.50585	CNAG_02181		Dihydrokaempferol 4-reductase			oxidoreductase activity, acting on the CH-OH group of donors, NAD or NADP as acceptor [GO:0016616]
J9VQ77	WT:uggt	TRUE	0.1	0.0584805	14.747	22.7177	7.97069	0	250.851	CNAG_02833		NADH dehydrogenase [ubiquinone] 1 beta subcomplex subunit 7		mitochondrial intermembrane space [GO:0005758]; mitochondrial respiratory chain complex I [GO:0005747]
J9VXB2	WT:uggt	TRUE	0.1	0.266793	14.8036	11.322	-3.48163	0	0.0895213	CNAG_07780		(2E,6E)-farnesyl diphosphate synthase (Dimethylallyltranstransferase) (Farnesyl diphosphate synthase) (Farnesyltranstransferase) (Geranylgeranyl diphosphate synthase)	isoprenoid biosynthetic process [GO:0008299]; plastoquinone biosynthetic process [GO:0010236]; ubiquinone biosynthetic process [GO:0006744]	mitochondrion [GO:0005739]; transferase complex [GO:1990234]	prenyltransferase activity [GO:0004659]
J9VRR4	WT:uggt	TRUE	0.4	0.226065	26.8192	27.0074	0.188256	0	1.13939	CNAG_04196		Actin binding protein	Arp2/3 complex-mediated actin nucleation [GO:0034314]	actin cortical patch [GO:0030479]; Arp2/3 protein complex [GO:0005885]	actin filament binding [GO:0051015]
J9VLR0	WT:uggt	TRUE	0.7	0.134203	22.2087	15.3217	-6.88696	0	0.00844924	CNAG_00504		Peptidyl-prolyl cis-trans isomerase (PPIase) (EC 5.2.1.8)		nucleus [GO:0005634]	peptidyl-prolyl cis-trans isomerase activity [GO:0003755]; RNA binding [GO:0003723]
J9VTF7	WT:uggt	TRUE	0.4	0.277555	25.0578	25.2018	0.144019	0	1.10498	CNAG_01150		Omega-6 fatty acid desaturase (Delta-12 desaturase)	unsaturated fatty acid biosynthetic process [GO:0006636]	membrane [GO:0016020]	omega-6 fatty acid desaturase activity [GO:0045485]
J9VLS4	WT:uggt	TRUE	0.7	0.532292	18.2117	14.9293	-3.28245	0	0.102774	CNAG_00519		Lathosterol oxidase	cellular lipid metabolic process [GO:0044255]; sterol biosynthetic process [GO:0016126]	membrane [GO:0016020]	C-5 sterol desaturase activity [GO:0000248]; iron ion binding [GO:0005506]
J9VSQ9	WT:uggt	TRUE	1	0.911796	23.6221	23.6868	0.0646719	0	1.04585	CNAG_02161		Inositol hexakisphosphate and diphosphoinositol-pentakisphosphate kinase (EC 2.7.4.24)	inositol metabolic process [GO:0006020]; inositol phosphate biosynthetic process [GO:0032958]	cytoskeleton [GO:0005856]; cytosol [GO:0005829]	ATP binding [GO:0005524]; diphosphoinositol-pentakisphosphate kinase activity [GO:0033857]; inositol heptakisphosphate kinase activity [GO:0000829]; inositol hexakisphosphate 1-kinase activity [GO:0052723]; inositol hexakisphosphate 3-kinase activity [GO:0052724]; inositol hexakisphosphate 5-kinase activity [GO:0000832]; inositol-1,3,4,5,6-pentakisphosphate kinase activity [GO:0000827]
J9VG55	WT:uggt	TRUE	0.1	0.0781678	14.7813	21.8161	7.03483	0	131.128	CNAG_03862		BAG domain-containing protein	protein stabilization [GO:0050821]	cytosol [GO:0005829]; membrane [GO:0016020]; nucleus [GO:0005634]	adenyl-nucleotide exchange factor activity [GO:0000774]; protein-folding chaperone binding [GO:0051087]
J9VMD7	WT:uggt	TRUE	0.1	0.0554476	10.4993	11.6446	1.14524	0	2.21183	CNAG_02923		Large subunit ribosomal protein L14	translation [GO:0006412]	cytosolic large ribosomal subunit [GO:0022625]; mitochondrial large ribosomal subunit [GO:0005762]	large ribosomal subunit rRNA binding [GO:0070180]; structural constituent of ribosome [GO:0003735]
Q9HF03	WT:uggt	TRUE	0.7	0.995723	18.4287	18.3993	-0.0294433	0	0.979798	CNAG_00694	CLF1	Pre-mRNA-splicing factor CLF1 (crooked-neck-like protein 1)	spliceosomal complex assembly [GO:0000245]	post-mRNA release spliceosomal complex [GO:0071014]; precatalytic spliceosome [GO:0071011]; Prp19 complex [GO:0000974]; U2-type catalytic step 2 spliceosome [GO:0071007]
J9VMC2	WT:uggt	TRUE	0.4	0.207726	11.2005	11.9184	0.717981	0	1.64488	CNAG_00710		Glutamine synthetase			glutamine synthetase activity [GO:0004356]
J9VKJ6	WT:uggt	TRUE	0.1	0.213202	25.6575	22.9513	-2.70615	0	0.153238	CNAG_01158		Branchpoint-bridging protein	mRNA splicing, via spliceosome [GO:0000398]; regulation of mRNA splicing, via spliceosome [GO:0048024]	spliceosomal complex [GO:0005681]	mRNA binding [GO:0003729]; pre-mRNA branch point binding [GO:0045131]; zinc ion binding [GO:0008270]
J9W2G5	WT:uggt	TRUE	0.1	0.228003	27.792	22.8056	-4.98638	0	0.0315463	CNAG_06095		Large subunit ribosomal protein L13e	translation [GO:0006412]	cytosolic large ribosomal subunit [GO:0022625]	RNA binding [GO:0003723]; structural constituent of ribosome [GO:0003735]
J9VI90	WT:uggt	TRUE	0.2	0.11164	15.0368	22.1832	7.14639	0	141.67	CNAG_03618		NADPH2:quinone reductase		cytosol [GO:0005829]	NADPH binding [GO:0070402]; NADPH:quinone reductase activity [GO:0003960]; zinc ion binding [GO:0008270]
J9VKQ5	WT:uggt	TRUE	0.1	0.1536	27.3949	25.7641	-1.63077	0	0.322916	CNAG_02686		mevalonate kinase (EC 2.7.1.36)	'de novo' L-methionine biosynthetic process [GO:0071266]; isopentenyl diphosphate biosynthetic process, mevalonate pathway [GO:0019287]; transsulfuration [GO:0019346]	cytoplasm [GO:0005737]	ATP binding [GO:0005524]; carbon-sulfur lyase activity [GO:0016846]; mevalonate kinase activity [GO:0004496]; pyridoxal phosphate binding [GO:0030170]
J9VHL7	WT:uggt	TRUE	0.2	0.107883	21.1365	15.0023	-6.13418	0	0.0142373	CNAG_03004		Riboflavin synthase (EC 2.5.1.9)	riboflavin biosynthetic process [GO:0009231]		riboflavin synthase activity [GO:0004746]
J9VMX4	WT:uggt	TRUE	0.1	0.00492766	22.9365	23.4785	0.541971	0	1.45596	CNAG_01344		Ysc84 actin-binding domain-containing protein			phosphatidylinositol binding [GO:0035091]
J9VTD6	WT:uggt	TRUE	0.1	0.217523	22.4016	17.9508	-4.45072	0	0.0457299	CNAG_01179		DNA-directed RNA polymerase I and III subunit RPAC1		RNA polymerase I complex [GO:0005736]; RNA polymerase III complex [GO:0005666]	protein dimerization activity [GO:0046983]; RNA polymerase I activity [GO:0001054]; RNA polymerase III activity [GO:0001056]
J9VRZ0	WT:uggt	TRUE	1	0.417859	22.625	19.2983	-3.32669	0	0.0996707	CNAG_05190		Abscisic acid G-protein coupled receptor-domain-containing protein	intracellular pH reduction [GO:0051452]	Golgi cisterna membrane [GO:0032580]	abscisic acid binding [GO:0010427]; voltage-gated monoatomic anion channel activity [GO:0008308]
J9W379	WT:uggt	TRUE	0.2	0.102042	22.9661	15.4387	-7.52742	0	0.00542026	CNAG_06402		26S proteasome complex subunit SEM1	double-strand break repair via homologous recombination [GO:0000724]; mRNA export from nucleus [GO:0006406]; proteasome assembly [GO:0043248]	nucleus [GO:0005634]; proteasome regulatory particle, lid subcomplex [GO:0008541]
J9VT91	WT:uggt	TRUE	0.7	0.431808	25.1673	24.735	-0.43228	0	0.741089	CNAG_03412		chitinase (EC 3.2.1.14)	chitin catabolic process [GO:0006032]; polysaccharide catabolic process [GO:0000272]	extracellular region [GO:0005576]	chitin binding [GO:0008061]; chitinase activity [GO:0004568]
J9VRH5	WT:uggt	TRUE	0.4	0.155996	25.0804	24.8004	-0.280055	0	0.82356	CNAG_04132		Pre-mRNA-splicing factor CWC2	mRNA processing [GO:0006397]; RNA splicing [GO:0008380]	Prp19 complex [GO:0000974]; U2-type catalytic step 1 spliceosome [GO:0071006]; U2-type catalytic step 2 spliceosome [GO:0071007]	metal ion binding [GO:0046872]; pre-mRNA binding [GO:0036002]; U6 snRNA binding [GO:0017070]
J9VJT3	WT:uggt	TRUE	0.7	0.787942	22.0635	22.1333	0.0698466	0	1.04961	CNAG_00739		Carnosine N-methyltransferase (EC 2.1.1.22)	carnosine metabolic process [GO:0035498]; methylation [GO:0032259]	cytosol [GO:0005829]; nucleus [GO:0005634]	carnosine N-methyltransferase activity [GO:0030735]
J9VPH3	WT:uggt	TRUE	0.1	0.082554	25.8713	23.4163	-2.45498	0	0.18238	CNAG_05234		Mitochondrial import inner membrane translocase subunit TIM54		membrane [GO:0016020]
J9VH19	WT:uggt	TRUE	0.4	0.30912	20.6042	20.9587	0.354598	0	1.27863	CNAG_02985		Splicing factor YJU2	generation of catalytic spliceosome for first transesterification step [GO:0000349]	U2-type catalytic step 1 spliceosome [GO:0071006]	metal ion binding [GO:0046872]
J9VEF7	WT:uggt	TRUE	0.2	0.113073	14.5071	21.303	6.79594	0	111.117	CNAG_00587	RIL3	Ricin B lectin domain-containing protein
J9VL66	WT:uggt	TRUE	0.2	0.110684	18.0817	11.3341	-6.7476	0	0.00930618	CNAG_00903		Uncharacterized protein
J9VRR6	WT:uggt	TRUE	0.2	0.157038	17.6606	18.7913	1.13069	0	2.18963	CNAG_07622		COP9 signalosome complex subunit 1		COP9 signalosome [GO:0008180]; cytoplasm [GO:0005737]
J9VIU6	WT:uggt	TRUE	0.7	0.345175	23.4798	19.5195	-3.96024	0	0.0642464	CNAG_05107		Prefoldin subunit 4	protein folding [GO:0006457]	cytoplasm [GO:0005737]; prefoldin complex [GO:0016272]	unfolded protein binding [GO:0051082]
J9VY37	WT:uggt	TRUE	0.4	0.133975	19.4267	11.7247	-7.70195	0	0.00480267	CNAG_03402		Mediator of RNA polymerase II transcription subunit 1
J9VVX1	WT:uggt	TRUE	1	0.752566	14.5963	13.2851	-1.31121	0	0.402984	CNAG_06379	NAT10	RNA cytidine acetyltransferase (EC 2.3.1.-) (18S rRNA cytosine acetyltransferase)	rRNA acetylation involved in maturation of SSU-rRNA [GO:1904812]; tRNA acetylation [GO:0051391]; tRNA wobble cytosine modification [GO:0002101]	90S preribosome [GO:0030686]; nucleolus [GO:0005730]	ATP binding [GO:0005524]; rRNA cytidine N-acetyltransferase activity [GO:1990883]; tRNA binding [GO:0000049]; tRNA N-acetyltransferase activity [GO:0051392]
J9VZV2	WT:uggt	TRUE	0.7	0.550338	23.0904	22.8694	-0.220974	0	0.857986	CNAG_07838		Cytoplasmic protein	N-acetylglucosamine metabolic process [GO:0006044]	cytoplasm [GO:0005737]
J9VX47	WT:uggt	TRUE	0.7	0.556816	22.7031	22.6286	-0.0745136	0	0.949662	CNAG_01754		Conserved oligomeric Golgi complex subunit 5	intra-Golgi vesicle-mediated transport [GO:0006891]	Golgi transport complex [GO:0017119]; membrane [GO:0016020]
J9VFR1	WT:uggt	TRUE	0.2	0.0855087	23.3528	23.9457	0.592887	0	1.50826	CNAG_00772		UV excision repair protein RAD23	nucleotide-excision repair [GO:0006289]; proteasome-mediated ubiquitin-dependent protein catabolic process [GO:0043161]	cytosol [GO:0005829]; nucleoplasm [GO:0005654]	damaged DNA binding [GO:0003684]; polyubiquitin modification-dependent protein binding [GO:0031593]; proteasome binding [GO:0070628]; ubiquitin binding [GO:0043130]
J9VWX8	WT:uggt	TRUE	0.2	0.216158	22.0667	21.9026	-0.164094	0	0.892489	CNAG_04398		Specific RNA polymerase II transcription factor	DNA-templated transcription [GO:0006351]	nucleus [GO:0005634]	DNA binding [GO:0003677]; DNA-binding transcription factor activity, RNA polymerase II-specific [GO:0000981]; zinc ion binding [GO:0008270]
J9VJ80	WT:uggt	TRUE	0.7	0.37677	15.4968	11.7322	-3.76462	0	0.0735759	CNAG_05242		Mediator of RNA polymerase II transcription subunit 14 (Mediator complex subunit 14)	regulation of transcription by RNA polymerase II [GO:0006357]	core mediator complex [GO:0070847]; mediator complex [GO:0016592]	transcription coregulator activity [GO:0003712]
J9VZM2	WT:uggt	TRUE	0.1	0.00929058	10.8823	11.7697	0.887448	0	1.8499	CNAG_07777		peptidyl-tRNA hydrolase (EC 3.1.1.29)			aminoacyl-tRNA hydrolase activity [GO:0004045]
J9W476	WT:uggt	TRUE	0.7	0.562586	22.6422	20.0135	-2.62872	0	0.161687	CNAG_05611		cysteine synthase (EC 2.5.1.47)	cysteine biosynthetic process from serine [GO:0006535]	cytoplasm [GO:0005737]; membrane [GO:0016020]
J9VDY5	WT:uggt	TRUE	1	0.411966	24.2155	23.9265	-0.289019	0	0.818459	CNAG_00111		Splicing factor 3A subunit 1	mRNA cis splicing, via spliceosome [GO:0045292]; regulation of alternative mRNA splicing, via spliceosome [GO:0000381]	catalytic step 2 spliceosome [GO:0071013]; U2 snRNP [GO:0005686]; U2-type prespliceosome [GO:0071004]	RNA binding [GO:0003723]
J9VJR6	WT:uggt	TRUE	0.1	0.0962074	24.8184	15.68	-9.13844	0	0.00177442	CNAG_05193		Endoplasmic reticulum-Golgi intermediate compartment protein 2	endoplasmic reticulum to Golgi vesicle-mediated transport [GO:0006888]; retrograde vesicle-mediated transport, Golgi to endoplasmic reticulum [GO:0006890]	COPII-coated ER to Golgi transport vesicle [GO:0030134]; endoplasmic reticulum membrane [GO:0005789]
J9VIM2	WT:uggt	TRUE	1	0.421623	11.7189	11.3302	-0.388726	0	0.763804	CNAG_03760		RAD50-interacting protein 1	endoplasmic reticulum to Golgi vesicle-mediated transport [GO:0006888]; regulation of ER to Golgi vesicle-mediated transport [GO:0060628]; retrograde vesicle-mediated transport, Golgi to endoplasmic reticulum [GO:0006890]	Dsl1/NZR complex [GO:0070939]
J9VSL5	WT:uggt	TRUE	0.2	0.0756504	10.62	11.3521	0.732102	0	1.66106	CNAG_04794		Spermine transporter		membrane [GO:0016020]	transmembrane transporter activity [GO:0022857]
J9W0H5	WT:uggt	TRUE	0.4	0.138048	20.1979	11.2701	-8.92777	0	0.0020534	CNAG_06216		Uncharacterized protein		extracellular region [GO:0005576]	oxidoreductase activity, acting on a sulfur group of donors, disulfide as acceptor [GO:0016671]
J9VQB7	WT:uggt	TRUE	0.1	0.102651	23.111	17.0067	-6.10423	0	0.014536	CNAG_07717		ubiquitinyl hydrolase 1 (EC 3.4.19.12)		nucleus [GO:0005634]	cysteine-type deubiquitinase activity [GO:0004843]
J9VZZ2	WT:uggt	TRUE	0.4	0.146631	18.2006	11.3284	-6.87221	0	0.0085361	CNAG_05598		Aminoglycoside phosphotransferase domain-containing protein
J9VFA7	WT:uggt	TRUE	0.1	0.180005	28.3221	25.7032	-2.61892	0	0.16279	CNAG_00649		Tryptophan synthase (EC 4.2.1.20)		cytoplasm [GO:0005737]	tryptophan synthase activity [GO:0004834]
J9VQ74	WT:uggt	TRUE	0.1	0.280792	25.1012	19.7169	-5.38432	0	0.0239419	CNAG_07163		Preprotein translocase subunit YidC	protein insertion into mitochondrial inner membrane from matrix [GO:0032979]	mitochondrial inner membrane [GO:0005743]	membrane insertase activity [GO:0032977]
J9VWV3	WT:uggt	TRUE	1	0.399124	22.4182	19.046	-3.37213	0	0.09658	CNAG_05881		Mannosyltransferase (EC 2.4.1.-)	protein N-linked glycosylation [GO:0006487]	endoplasmic reticulum membrane [GO:0005789]	dol-P-Man:Man(6)GlcNAc(2)-PP-Dol alpha-1,2-mannosyltransferase activity [GO:0052926]; dol-P-Man:Man(8)GlcNAc(2)-PP-Dol alpha-1,2-mannosyltransferase activity [GO:0052918]
J9VZR8	WT:uggt	TRUE	1	0.383393	19.9547	24.6407	4.68601	0	25.7412	CNAG_04541		Cleavage stimulation factor subunit 2	mRNA 3'-end processing [GO:0031124]	mRNA cleavage and polyadenylation specificity factor complex [GO:0005847]	mRNA binding [GO:0003729]
J9VEH0	WT:uggt	TRUE	0.7	0.437153	24.6616	24.8525	0.190848	0	1.14143	CNAG_00260		Transformer-2 protein	positive regulation of mRNA splicing, via spliceosome [GO:0048026]	spliceosomal complex [GO:0005681]	RNA binding [GO:0003723]
J9VQQ3	WT:uggt	TRUE	0.1	0.0391353	21.3343	21.6836	0.349269	0	1.27391	CNAG_01232	PMC1	Calcium-transporting ATPase 2 (EC 7.2.2.10)	calcium ion import into vacuole [GO:0140146]; regulation of cytosolic calcium ion concentration [GO:0051480]	vacuolar membrane [GO:0005774]	ATP binding [GO:0005524]; ATP hydrolysis activity [GO:0016887]; metal ion binding [GO:0046872]; P-type calcium transporter activity [GO:0005388]; PDZ domain binding [GO:0030165]
J9VMG4	WT:uggt	TRUE	0.7	0.652749	25.0478	24.9513	-0.0964407	0	0.935338	CNAG_02421		Manganese/iron superoxide dismutase C-terminal domain-containing protein			superoxide dismutase activity [GO:0004784]
J9VME3	WT:uggt	TRUE	0.1	0.162115	25.3146	19.0965	-6.21809	0	0.0134328	CNAG_02918		acetyl-CoA C-acetyltransferase (EC 2.3.1.9)	fatty acid beta-oxidation [GO:0006635]	mitochondrion [GO:0005739]	acetyl-CoA C-acetyltransferase activity [GO:0003985]; metal ion binding [GO:0046872]
J9VHM4	WT:uggt	TRUE	0.1	0.00941003	22.3714	22.7825	0.411084	0	1.32968	CNAG_02795		phosphoribosylglycinamide formyltransferase 1 (EC 2.1.2.2) (5'-phosphoribosylglycinamide transformylase) (GAR transformylase)	'de novo' IMP biosynthetic process [GO:0006189]	cytosol [GO:0005829]	phosphoribosylglycinamide formyltransferase activity [GO:0004644]
J9VH88	WT:uggt	TRUE	1	0.398355	22.4374	18.9853	-3.45207	0	0.0913741	CNAG_02920		Hydrolase	asparagine metabolic process [GO:0006528]; glutamine metabolic process [GO:0006541]; oxaloacetate metabolic process [GO:0006107]	mitochondrion [GO:0005739]	omega-amidase activity [GO:0050152]
J9VW63	WT:uggt	TRUE	0.2	0.109104	25.1746	24.317	-0.857571	0	0.551881	CNAG_06630		Mitochondrial import inner membrane translocase subunit TIM44	protein import into mitochondrial matrix [GO:0030150]	mitochondrial inner membrane [GO:0005743]	protein-folding chaperone binding [GO:0051087]
J9VYT0	WT:uggt	TRUE	0.7	0.242698	22.7443	23.1107	0.366399	0	1.28913	CNAG_01614		U4/U6.U5 tri-snRNP-associated protein 2	spliceosomal complex assembly [GO:0000245]	spliceosomal complex [GO:0005681]	cysteine-type deubiquitinase activity [GO:0004843]; zinc ion binding [GO:0008270]
J9VGC1	WT:uggt	TRUE	0.1	0.032561	26.4883	26.8212	0.332921	0	1.25956	CNAG_03688		Uncharacterized protein
J9VF45	WT:uggt	TRUE	0.4	0.118733	21.5439	14.5816	-6.96235	0	0.00801909	CNAG_00577		WIBG Mago-binding domain-containing protein	exon-exon junction complex disassembly [GO:1903259]	cytoplasm [GO:0005737]; exon-exon junction complex [GO:0035145]	RNA binding [GO:0003723]
J9VTY8	WT:uggt	TRUE	0.1	0.0896168	24.3819	15.7966	-8.58526	0	0.00260363	CNAG_01528		Serine hydrolase domain-containing protein	response to retinoic acid [GO:0032526]; secondary metabolic process [GO:0019748]	cytoplasm [GO:0005737]; nucleus [GO:0005634]	hydrolase activity [GO:0016787]
J9VTY3	WT:uggt	TRUE	0.1	0.0925352	23.0645	14.7466	-8.31794	0	0.00313365	CNAG_05751		Large ribosomal subunit protein bL21m		mitochondrial large ribosomal subunit [GO:0005762]	structural constituent of ribosome [GO:0003735]
J9VUH9	WT:uggt	TRUE	0.4	0.502906	19.5128	15.4657	-4.04707	0	0.0604938	CNAG_01679		Small subunit ribosomal protein S15	translation [GO:0006412]	cytosolic small ribosomal subunit [GO:0022627]	structural constituent of ribosome [GO:0003735]
J9VWX1	WT:uggt	TRUE	0.7	0.478091	26.7687	26.5203	-0.248417	0	0.84182	CNAG_05900		glycine--tRNA ligase (EC 6.1.1.14) (Diadenosine tetraphosphate synthetase)	mitochondrial glycyl-tRNA aminoacylation [GO:0070150]	mitochondrion [GO:0005739]	ATP binding [GO:0005524]; glycine-tRNA ligase activity [GO:0004820]
J9VS56	WT:uggt	TRUE	0.7	0.492483	21.7539	22.1409	0.38703	0	1.3077	CNAG_02415	ANX1	Annexin C1		cytoplasm [GO:0005737]; nucleus [GO:0005634]; plasma membrane [GO:0005886]	1-phosphatidylinositol binding [GO:0005545]; calcium ion binding [GO:0005509]; calcium-dependent phospholipid binding [GO:0005544]; heparin binding [GO:0008201]; phosphatidylethanolamine binding [GO:0008429]; phosphatidylserine binding [GO:0001786]
J9VRN9	WT:uggt	TRUE	0.2	0.475416	18.4107	14.9013	-3.50932	0	0.0878191	CNAG_04406	ATG27	Autophagy-related protein 27		cytoplasmic vesicle membrane [GO:0030659]; phagophore assembly site membrane [GO:0034045]; trans-Golgi network [GO:0005802]
J9VQK8	WT:uggt	TRUE	0.7	0.215485	23.0315	16.0919	-6.93961	0	0.00814647	CNAG_02714		Elongation factor 1-beta		cytosol [GO:0005829]; eukaryotic translation elongation factor 1 complex [GO:0005853]	guanyl-nucleotide exchange factor activity [GO:0005085]; translation elongation factor activity [GO:0003746]
J9VNZ0	WT:uggt	TRUE	0.7	0.399751	15.0975	11.3216	-3.7759	0	0.0730031	CNAG_06668		Mitochondrial protein	mitochondrial cytochrome c oxidase assembly [GO:0033617]	mitochondrial respirasome [GO:0005746]
J9VTF0	WT:uggt	TRUE	0.2	0.112673	22.597	22.2323	-0.364663	0	0.77665	CNAG_07439		U3 small nucleolar RNA-associated protein 21	rRNA processing [GO:0006364]	Pwp2p-containing subcomplex of 90S preribosome [GO:0034388]; small-subunit processome [GO:0032040]
J9W2S2	WT:uggt	TRUE	0.1	0.0252127	21.1283	22.1261	0.997805	0	1.99696	CNAG_06192		Uncharacterized protein
J9VQC9	WT:uggt	TRUE	0.7	0.137611	26.551	25.4861	-1.06492	0	0.477998	CNAG_03463		Eisosome component PIL1-domain-containing protein	eisosome assembly [GO:0070941]; endocytosis [GO:0006897]	eisosome filament [GO:0036286]; plasma membrane [GO:0005886]	lipid binding [GO:0008289]
J9VGW3	WT:uggt	TRUE	0.1	0.00284463	25.3785	24.6972	-0.681292	0	0.623607	CNAG_03053		Large subunit ribosomal protein L23	translation [GO:0006412]	cytosolic large ribosomal subunit [GO:0022625]	rRNA binding [GO:0019843]; structural constituent of ribosome [GO:0003735]
J9VN49	WT:uggt	TRUE	1	0.992177	22.4321	22.4303	-0.00176309	0	0.998779	CNAG_01271		Pre-mRNA-splicing factor ISY1	generation of catalytic spliceosome for second transesterification step [GO:0000350]; mRNA 3'-splice site recognition [GO:0000389]	catalytic step 2 spliceosome [GO:0071013]; post-mRNA release spliceosomal complex [GO:0071014]; post-spliceosomal complex [GO:0071020]; Prp19 complex [GO:0000974]
J9VTS8	WT:uggt	TRUE	0.1	0.108857	24.0506	22.3993	-1.65133	0	0.318347	CNAG_07752		UDP-galactopyranose mutase			oxidoreductase activity [GO:0016491]
J9VIJ6	WT:uggt	TRUE	0.1	0.156453	24.907	18.8729	-6.03413	0	0.0152597	CNAG_00256		aspartate-semialdehyde dehydrogenase (EC 1.2.1.11)	lysine biosynthetic process via diaminopimelate [GO:0009089]; methionine biosynthetic process [GO:0009086]; threonine biosynthetic process [GO:0009088]		aspartate-semialdehyde dehydrogenase activity [GO:0004073]; NAD binding [GO:0051287]; NADP binding [GO:0050661]; protein dimerization activity [GO:0046983]
J9VNU2	WT:uggt	TRUE	0.4	0.136761	18.6992	11.2866	-7.4126	0	0.0058693	CNAG_06603		Di-and tripeptidase	glutathione catabolic process [GO:0006751]; lysine biosynthetic process via diaminopimelate [GO:0009089]; proteolysis [GO:0006508]	cytosol [GO:0005829]	peptidase activity [GO:0008233]; succinyl-diaminopimelate desuccinylase activity [GO:0009014]
J9VKK3	WT:uggt	TRUE	1	0.991231	15.0885	15.0322	-0.0563243	0	0.961711	CNAG_03640		CUE domain-containing protein		membrane [GO:0016020]	serine-type endopeptidase activity [GO:0004252]; ubiquitin binding [GO:0043130]
H6VMG0	WT:uggt	TRUE	0.1	0.101333	21.0497	14.8328	-6.21695	0	0.0134435	CNAG_05155	PTP2	Protein-tyrosine-phosphatase (EC 3.1.3.48)			protein tyrosine phosphatase activity [GO:0004725]
J9VND2	WT:uggt	TRUE	0.4	0.442294	16.9483	13.9231	-3.02525	0	0.122831	CNAG_01230	CDA2/MP98	Chitin deacetylase 2 (EC 3.5.1.41)	cell wall chitin catabolic process [GO:0006039]; cell wall organization [GO:0071555]; fungal-type cell wall biogenesis [GO:0009272]; polysaccharide catabolic process [GO:0000272]	extracellular region [GO:0005576]; fungal-type cell wall [GO:0009277]; plasma membrane [GO:0005886]; side of membrane [GO:0098552]	chitin binding [GO:0008061]; chitin deacetylase activity [GO:0004099]; metal ion binding [GO:0046872]
J9VPF2	WT:uggt	TRUE	0.7	0.385046	26.1989	24.6373	-1.5616	0	0.338776	CNAG_05814		Small subunit ribosomal protein S10e		cytosolic small ribosomal subunit [GO:0022627]	RNA binding [GO:0003723]; structural constituent of ribosome [GO:0003735]
J9VUK5	WT:uggt	TRUE	0.2	0.119131	24.8669	24.1038	-0.763078	0	0.589238	CNAG_04365		Ribosome biogenesis protein MAK21		nucleus [GO:0005634]
J9VQR1	WT:uggt	TRUE	0.2	0.316686	23.9256	19.4088	-4.51673	0	0.0436846	CNAG_03590		Casein kinase II subunit beta (CK II beta)	regulation of transcription by RNA polymerase III [GO:0006359]	cytoplasm [GO:0005737]; protein kinase CK2 complex [GO:0005956]; UTP-C complex [GO:0034456]	kinase activity [GO:0016301]; protein kinase regulator activity [GO:0019887]
J9VP00	WT:uggt	TRUE	0.1	0.082288	27.1079	16.1724	-10.9355	0	0.000510624	CNAG_03890		Histone-lysine N-methyltransferase SET5 (SET domain-containing protein 5)	methylation [GO:0032259]; negative regulation of gene expression, epigenetic [GO:0045814]		histone H4K20 methyltransferase activity [GO:0042799]
J9VYR9	WT:uggt	TRUE	0.2	0.27848	11.5339	11.9832	0.449338	0	1.36541	CNAG_01600		Glutamate-rich WD repeat-containing protein 1	ribosome biogenesis [GO:0042254]	nucleolus [GO:0005730]
J9VXH1	WT:uggt	TRUE	0.4	0.212655	22.6661	22.8873	0.221149	0	1.16566	CNAG_01915		Ribonucleoside-diphosphate reductase subunit M2	deoxyribonucleotide biosynthetic process [GO:0009263]	cytosol [GO:0005829]	ribonucleoside-diphosphate reductase activity, thioredoxin disulfide as acceptor [GO:0004748]
J9VZK0	WT:uggt	TRUE	0.1	0.0340021	25.274	24.6024	-0.671628	0	0.627798	CNAG_04460		RNA polymerase II transcription factor		cytoskeleton [GO:0005856]	hydrolase activity [GO:0016787]
J9VJ34	WT:uggt	TRUE	1	0.563223	21.6307	22.328	0.697315	0	1.62148	CNAG_04973		Importin N-terminal domain-containing protein	protein import into nucleus [GO:0006606]	cytosol [GO:0005829]; nuclear envelope [GO:0005635]	small GTPase binding [GO:0031267]
J9VRI9	WT:uggt	TRUE	0.4	0.457934	14.6135	18.1534	3.53984	0	11.6305	CNAG_04341		Recyclin-1	exocytosis [GO:0006887]; Golgi to plasma membrane transport [GO:0006893]	exocyst [GO:0000145]
J9VZQ5	WT:uggt	TRUE	0.4	0.330013	23.1987	24.061	0.862347	0	1.81799	CNAG_01970		C3H1-type domain-containing protein	negative regulation of DNA-templated transcription [GO:0045892]	nucleus [GO:0005634]	metal ion binding [GO:0046872]; RNA binding [GO:0003723]
J9VKG1	WT:uggt	TRUE	0.7	0.433205	10.396	10.9852	0.589216	0	1.50443	CNAG_01196		Tyrosyl-DNA phosphodiesterase 1	DNA repair [GO:0006281]	nucleus [GO:0005634]	3'-tyrosyl-DNA phosphodiesterase activity [GO:0017005]; double-stranded DNA binding [GO:0003690]; nuclease activity [GO:0004518]; single-stranded DNA binding [GO:0003697]
J9VZJ2	WT:uggt	TRUE	0.1	0.235982	26.0016	19.6161	-6.38554	0	0.0119608	CNAG_04450		Chromodomain-helicase-DNA-binding protein 1	nucleosome organization [GO:0034728]; regulation of transcription by RNA polymerase II [GO:0006357]	chromatin [GO:0000785]; nucleus [GO:0005634]	ATP binding [GO:0005524]; ATP hydrolysis activity [GO:0016887]; ATP-dependent chromatin remodeler activity [GO:0140658]; chromatin binding [GO:0003682]; DNA binding [GO:0003677]; helicase activity [GO:0004386]; histone binding [GO:0042393]
J9W1S0	WT:uggt	TRUE	0.2	0.194098	25.3295	25.4461	0.116586	0	1.08417	CNAG_01850		histidine kinase (EC 2.7.13.3)	cellular hyperosmotic response [GO:0071474]	membrane [GO:0016020]	phosphorelay sensor kinase activity [GO:0000155]
J9VJY1	WT:uggt	TRUE	0.1	0.0814365	23.5903	14.8942	-8.69604	0	0.00241119	CNAG_00754		ATP-binding cassette, sub-family E, member 1	ribosomal subunit export from nucleus [GO:0000054]; translational initiation [GO:0006413]; translational termination [GO:0006415]		ATP binding [GO:0005524]; ATP hydrolysis activity [GO:0016887]; iron ion binding [GO:0005506]; ribosomal small subunit binding [GO:0043024]
J9W286	WT:uggt	TRUE	0.1	0.122469	23.0717	22.8066	-0.265074	0	0.832156	CNAG_05997		Uncharacterized protein		mitochondrion [GO:0005739]
J9VW66	WT:uggt	TRUE	0.1	0.076163	21.9952	23.05	1.05489	0	2.07756	CNAG_06635		General negative regulator of transcription subunit	nuclear-transcribed mRNA poly(A) tail shortening [GO:0000289]; regulation of DNA-templated transcription [GO:0006355]	CCR4-NOT core complex [GO:0030015]; nucleus [GO:0005634]; P-body [GO:0000932]
J9VJQ0	WT:uggt	TRUE	0.1	0.100855	22.462	15.0099	-7.45207	0	0.00571088	CNAG_03038		CTLH domain-containing protein	negative regulation of gluconeogenesis [GO:0045721]; proteasome-mediated ubiquitin-dependent protein catabolic process [GO:0043161]	cytoplasm [GO:0005737]; nucleus [GO:0005634]
J9VKD0	WT:uggt	TRUE	0.4	0.259377	25.6878	24.5075	-1.18034	0	0.441247	CNAG_01435		serine--tRNA ligase (EC 6.1.1.11) (Seryl-tRNA synthetase) (Seryl-tRNA(Ser) synthetase)	mitochondrial seryl-tRNA aminoacylation [GO:0070158]	cytosol [GO:0005829]; mitochondrion [GO:0005739]	ATP binding [GO:0005524]; serine-tRNA ligase activity [GO:0004828]; tRNA binding [GO:0000049]
J9VW74	WT:uggt	TRUE	0.7	0.13281	22.9145	15.6491	-7.2654	0	0.00649973	CNAG_06645		Methylenetetrahydrofolate dehydrogenase (NAD )	purine nucleobase biosynthetic process [GO:0009113]; tetrahydrofolate interconversion [GO:0035999]	cytosol [GO:0005829]	methenyltetrahydrofolate cyclohydrolase activity [GO:0004477]; methylenetetrahydrofolate dehydrogenase (NAD+) activity [GO:0004487]; methylenetetrahydrofolate dehydrogenase (NADP+) activity [GO:0004488]
J9VWR2	WT:uggt	TRUE	0.4	0.370613	11.4509	14.8476	3.39671	0	10.532	CNAG_01646		Rab proteins geranylgeranyltransferase	small GTPase-mediated signal transduction [GO:0007264]; vesicle-mediated transport [GO:0016192]	cytosol [GO:0005829]; nucleus [GO:0005634]; Rab-protein geranylgeranyltransferase complex [GO:0005968]	GDP-dissociation inhibitor activity [GO:0005092]
J9VKM5	WT:uggt	TRUE	0.1	0.101758	24.4724	23.0623	-1.41016	0	0.37627	CNAG_01347	DNJ1	Tetratricopeptide repeat and J domain-containing co-chaperone DNJ1	protein folding in endoplasmic reticulum [GO:0034975]	endoplasmic reticulum lumen [GO:0005788]	misfolded protein binding [GO:0051787]; protein-folding chaperone binding [GO:0051087]
J9VSH3	WT:uggt	TRUE	0.1	0.272747	26.1125	20.607	-5.50546	0	0.0220135	CNAG_04499		Clathrin light chain	clathrin-dependent endocytosis [GO:0072583]; intracellular protein transport [GO:0006886]	clathrin coat of coated pit [GO:0030132]; clathrin coat of trans-Golgi network vesicle [GO:0030130]	clathrin heavy chain binding [GO:0032050]; structural molecule activity [GO:0005198]
J9VP44	WT:uggt	TRUE	0.4	0.320812	26.2671	25.9877	-0.279346	0	0.823965	CNAG_05695		glucosamine-phosphate N-acetyltransferase (EC 2.3.1.4)	signal transduction [GO:0007165]; UDP-N-acetylglucosamine biosynthetic process [GO:0006048]	endoplasmic reticulum [GO:0005783]; endoplasmic reticulum-Golgi intermediate compartment [GO:0005793]; Golgi apparatus [GO:0005794]	glucosamine 6-phosphate N-acetyltransferase activity [GO:0004343]; GTPase activator activity [GO:0005096]; monosaccharide binding [GO:0048029]
J9W2Y3	WT:uggt	TRUE	0.1	0.0874852	11.8792	11.0806	-0.798665	0	0.574881	CNAG_06271		Uncharacterized protein		membrane [GO:0016020]
J9VQC1	WT:uggt	TRUE	0.2	0.110098	11.6799	19.0617	7.38177	0	166.777	CNAG_03206	NTH1	Endonuclease III homolog (EC 3.2.2.-) (EC 4.2.99.18) (Bifunctional DNA N-glycosylase/DNA-(apurinic or apyrimidinic site) lyase) (DNA glycosylase/AP lyase)	base-excision repair, AP site formation [GO:0006285]	mitochondrion [GO:0005739]; nucleus [GO:0005634]	class I DNA-(apurinic or apyrimidinic site) endonuclease activity [GO:0140078]; DNA binding [GO:0003677]; endonuclease activity [GO:0004519]; oxidized pyrimidine nucleobase lesion DNA N-glycosylase activity [GO:0000703]
J9VJA9	WT:uggt	TRUE	0.7	0.533618	11.4653	11.7421	0.276746	0	1.21146	CNAG_03991		Glycerophosphocholine acyltransferase 1	phosphatidylcholine biosynthetic process [GO:0006656]	membrane [GO:0016020]	acyltransferase activity [GO:0016746]
J9VI09	WT:uggt	TRUE	0.2	0.204161	26.9517	26.4253	-0.526368	0	0.6943	CNAG_02858		Adenylosuccinate synthetase (AMPSase) (AdSS) (EC 6.3.4.4) (IMP--aspartate ligase)	'de novo' AMP biosynthetic process [GO:0044208]; IMP metabolic process [GO:0046040]	cytoplasm [GO:0005737]	adenylosuccinate synthase activity [GO:0004019]; GTP binding [GO:0005525]; magnesium ion binding [GO:0000287]
J9VJU4	WT:uggt	TRUE	0.1	0.0126691	24.6945	24.1572	-0.53731	0	0.689054	CNAG_02991		Cofilin (Actin-depolymerizing factor 1)	actin filament fragmentation [GO:0030043]; actin filament severing [GO:0051014]	actin cortical patch [GO:0030479]; nuclear matrix [GO:0016363]	actin filament binding [GO:0051015]
J9VPL2	WT:uggt	TRUE	1	0.386675	24.1534	19.6683	-4.48516	0	0.0446511	CNAG_03156	SCS3	Inositol phospholipid biosynthesis protein Scs3	lipid droplet organization [GO:0034389]; lipid storage [GO:0019915]; phospholipid biosynthetic process [GO:0008654]	endoplasmic reticulum membrane [GO:0005789]	coenzyme A diphosphatase activity [GO:0010945]
J9VNI6	WT:uggt	TRUE	0.2	0.0613288	23.9397	24.1826	0.242907	0	1.18337	CNAG_01169		aspartyl aminopeptidase (EC 3.4.11.21)	proteolysis [GO:0006508]	fungal-type vacuole [GO:0000324]	metalloaminopeptidase activity [GO:0070006]; zinc ion binding [GO:0008270]
J9VVW4	WT:uggt	TRUE	1	0.411689	15.2117	12.0102	-3.20151	0	0.108705	CNAG_04671		EXS domain-containing protein		cytoplasm [GO:0005737]; membrane [GO:0016020]
J9VZ29	WT:uggt	TRUE	0.4	0.315983	11.7171	11.9496	0.232528	0	1.17489	CNAG_01680		3-methylcrotonyl-CoA carboxylase alpha subunit		mitochondrion [GO:0005739]	ATP binding [GO:0005524]; metal ion binding [GO:0046872]; methylcrotonoyl-CoA carboxylase activity [GO:0004485]; propionyl-CoA carboxylase activity [GO:0004658]; urea carboxylase activity [GO:0004847]
J9W0G9	WT:uggt	TRUE	0.1	0.210409	24.6736	22.8796	-1.79394	0	0.288382	CNAG_04678	YPK1	Serine/threonine-protein kinase YPK1 (EC 2.7.11.1)	regulation of sphingolipid biosynthetic process [GO:0090153]	cytoplasm [GO:0005737]; nucleus [GO:0005634]	ATP binding [GO:0005524]; protein serine kinase activity [GO:0106310]; protein serine/threonine kinase activity [GO:0004674]
J9VN29	WT:uggt	TRUE	0.1	0.105972	26.1139	16.3728	-9.74106	0	0.00116855	CNAG_01291		Nucleic acid-binding protein			single-stranded DNA binding [GO:0003697]
J9W134	WT:uggt	TRUE	0.7	0.385063	24.4029	20.3216	-4.0813	0	0.0590755	CNAG_06455		Protein ORM1	ceramide metabolic process [GO:0006672]; intracellular sphingolipid homeostasis [GO:0090156]; sphingolipid biosynthetic process [GO:0030148]	endoplasmic reticulum membrane [GO:0005789]; SPOTS complex [GO:0035339]
J9VSV5	WT:uggt	TRUE	0.1	0.134475	25.3572	21.6832	-3.67396	0	0.0783482	CNAG_01340		ATPase	positive regulation of transcription by RNA polymerase II [GO:0045944]	nucleus [GO:0005634]	ATP binding [GO:0005524]; ATP hydrolysis activity [GO:0016887]; chromatin binding [GO:0003682]; histone binding [GO:0042393]
J9VW37	WT:uggt	TRUE	0.2	0.0707721	20.2967	18.3157	-1.98096	0	0.253321	CNAG_04108		Protein-serine/threonine kinase (EC 2.7.11.-)	regulation of glucose metabolic process [GO:0010906]	mitochondrial matrix [GO:0005759]	ATP binding [GO:0005524]; pyruvate dehydrogenase (acetyl-transferring) kinase activity [GO:0004740]
J9VR17	WT:uggt	TRUE	1	0.675405	15.5103	17.9041	2.39386	0	5.2556	CNAG_06566		Sugar phosphate phosphatase (EC 3.1.3.-)		nucleus [GO:0005634]	fructose 6-phosphate aldolase activity [GO:0097023]; fructose-1-phosphatase activity [GO:0103026]; metal ion binding [GO:0046872]
J9W241	WT:uggt	TRUE	0.1	0.103582	27.3027	16.6112	-10.6915	0	0.000604699	CNAG_01991		Cytochrome c oxidase subunit 4	mitochondrial electron transport, cytochrome c to oxygen [GO:0006123]	mitochondrial respiratory chain complex IV [GO:0005751]
J9VZI7	WT:uggt	TRUE	0.7	0.329592	26.4942	25.4978	-0.996409	0	0.501246	CNAG_04445		40S ribosomal protein S7	ribosomal small subunit biogenesis [GO:0042274]; rRNA processing [GO:0006364]; translation [GO:0006412]	90S preribosome [GO:0030686]; cytosolic small ribosomal subunit [GO:0022627]; small-subunit processome [GO:0032040]	structural constituent of ribosome [GO:0003735]
J9VGF3	WT:uggt	TRUE	0.1	0.101611	23.6682	15.5124	-8.15582	0	0.00350633	CNAG_03957		4-nitrophenylphosphatase (PNPPase) (EC 3.1.3.41)			alkaline phosphatase activity [GO:0004035]; metal ion binding [GO:0046872]; phosphoglycolate phosphatase activity [GO:0008967]
J9VMC8	WT:uggt	TRUE	0.1	0.0774017	22.2249	14.561	-7.66391	0	0.00493097	CNAG_00715		Uncharacterized protein		membrane [GO:0016020]
T2BNC3	WT:uggt	TRUE	1	0.898213	11.1398	11.2358	0.0959091	0	1.06874	CNAG_08000		Uncharacterized protein		membrane [GO:0016020]
J9W1N7	WT:uggt	TRUE	0.1	0.00291796	25.7593	25.3617	-0.397611	0	0.759114	CNAG_01809		U4/U6 small nuclear ribonucleoprotein PRP3	mRNA splicing, via spliceosome [GO:0000398]	U4/U6 x U5 tri-snRNP complex [GO:0046540]
T2BNZ0	WT:uggt	TRUE	0.1	0.267103	28.0644	21.8364	-6.22803	0	0.0133406	CNAG_01152		40S ribosomal protein S6	translation [GO:0006412]	ribonucleoprotein complex [GO:1990904]; ribosome [GO:0005840]	structural constituent of ribosome [GO:0003735]
J9VP66	WT:uggt	TRUE	0.7	0.429298	21.9877	19.0223	-2.96538	0	0.128036	CNAG_03975	ERB1	Ribosome biogenesis protein ERB1 (Eukaryotic ribosome biogenesis protein 1)	maturation of 5.8S rRNA from tricistronic rRNA transcript (SSU-rRNA, 5.8S rRNA, LSU-rRNA) [GO:0000466]; maturation of LSU-rRNA from tricistronic rRNA transcript (SSU-rRNA, 5.8S rRNA, LSU-rRNA) [GO:0000463]	nucleoplasm [GO:0005654]; PeBoW complex [GO:0070545]; preribosome, large subunit precursor [GO:0030687]	ribonucleoprotein complex binding [GO:0043021]
J9VSB6	WT:uggt	TRUE	0.4	0.359766	15.8676	11.8117	-4.05587	0	0.0601257	CNAG_02340		Uncharacterized protein	endoplasmic reticulum membrane organization [GO:0090158]; endoplasmic reticulum to Golgi vesicle-mediated transport [GO:0006888]	cytoplasm [GO:0005737]
J9VQC4	WT:uggt	TRUE	1	0.968514	11.3778	11.346	-0.0318605	0	0.978158	CNAG_02199		Alpha-1,6-mannosyltransferase	carbohydrate derivative metabolic process [GO:1901135]	membrane [GO:0016020]
J9VSZ9	WT:uggt	TRUE	0.7	0.122905	18.2433	11.2114	-7.03193	0	0.00764148	CNAG_02075		Uncharacterized protein	mitochondrial proton-transporting ATP synthase complex assembly [GO:0033615]	mitochondrial inner membrane [GO:0005743]
J9VXX2	WT:uggt	TRUE	0.1	0.284653	18.5052	22.5838	4.07863	0	16.8962	CNAG_03335		ribose-phosphate diphosphokinase (EC 2.7.6.1)	5-phosphoribose 1-diphosphate biosynthetic process [GO:0006015]; fungal-type cell wall organization [GO:0031505]; purine nucleotide biosynthetic process [GO:0006164]; ribonucleoside monophosphate biosynthetic process [GO:0009156]	cytoplasm [GO:0005737]; ribose phosphate diphosphokinase complex [GO:0002189]	ATP binding [GO:0005524]; kinase activity [GO:0016301]; magnesium ion binding [GO:0000287]; ribose phosphate diphosphokinase activity [GO:0004749]
J9VNK1	WT:uggt	TRUE	0.1	0.34979	24.3834	20.1326	-4.25082	0	0.0525261	CNAG_06927		peptidylprolyl isomerase (EC 5.2.1.8)	protein folding [GO:0006457]	cytosol [GO:0005829]; intracellular membrane-bounded organelle [GO:0043231]; plasma membrane [GO:0005886]	peptidyl-prolyl cis-trans isomerase activity [GO:0003755]
J9VTR0	WT:uggt	TRUE	0.1	0.285241	24.1208	19.2504	-4.87039	0	0.0341873	CNAG_06692		Glucosamine 6-phosphate N-acetyltransferase (EC 2.3.1.4)	UDP-N-acetylglucosamine biosynthetic process [GO:0006048]	endoplasmic reticulum [GO:0005783]; endoplasmic reticulum-Golgi intermediate compartment [GO:0005793]; Golgi apparatus [GO:0005794]	glucosamine 6-phosphate N-acetyltransferase activity [GO:0004343]; monosaccharide binding [GO:0048029]
J9VV59	WT:uggt	TRUE	0.1	0.00365281	23.0213	22.0564	-0.964953	0	0.512295	CNAG_01948		Nuclear protein	DNA-templated transcription [GO:0006351]; positive regulation of transcription from RNA polymerase II promoter by galactose [GO:0000435]	nucleus [GO:0005634]	DNA-binding transcription factor activity, RNA polymerase II-specific [GO:0000981]; RNA polymerase II cis-regulatory region sequence-specific DNA binding [GO:0000978]; zinc ion binding [GO:0008270]
J9W146	WT:uggt	TRUE	0.1	0.0649048	14.7987	23.4229	8.62417	0	394.579	CNAG_06472		Nucleolar protein 4		nucleolus [GO:0005730]	mRNA binding [GO:0003729]
J9VP24	WT:uggt	TRUE	1	0.46238	22.1995	19.2551	-2.94444	0	0.129908	CNAG_00960		RNA helicase (EC 3.6.4.13)	spliceosomal complex disassembly [GO:0000390]	catalytic step 2 spliceosome [GO:0071013]	ATP binding [GO:0005524]; hydrolase activity [GO:0016787]; RNA binding [GO:0003723]; RNA helicase activity [GO:0003724]
J9VLM1	WT:uggt	TRUE	0.2	0.0884517	16.7094	10.9662	-5.74317	0	0.0186696	CNAG_00453		Mitochondrial protein	mitochondrial cytochrome c oxidase assembly [GO:0033617]	mitochondrial respirasome [GO:0005746]
J9VVH9	WT:uggt	TRUE	0.2	0.172412	23.452	23.8022	0.350234	0	1.27477	CNAG_06229		Uncharacterized protein	defense response to fungus [GO:0050832]	cytoplasm [GO:0005737]; nucleus [GO:0005634]	protein-folding chaperone binding [GO:0051087]
T2BQD4	WT:uggt	TRUE	0.7	0.137945	19.7457	11.8755	-7.87014	0	0.00427417	CNAG_00536		NADH dehydrogenase [ubiquinone] 1 alpha subcomplex subunit 1		mitochondrial respiratory chain complex I [GO:0005747]
J9VLD7	WT:uggt	TRUE	0.2	0.113285	15.0562	21.5165	6.46037	0	88.0574	CNAG_00360		Nuclear protein SNF4		cytoplasm [GO:0005737]; nucleotide-activated protein kinase complex [GO:0031588]; nucleus [GO:0005634]	AMP binding [GO:0016208]; protein kinase binding [GO:0019901]; protein kinase regulator activity [GO:0019887]
J9VM77	WT:uggt	TRUE	0.7	0.301792	21.0848	17.0292	-4.05566	0	0.0601347	CNAG_00666		Nucleoporin nsp1
J9VUT1	WT:uggt	TRUE	0.2	0.168338	25.0128	23.019	-1.99385	0	0.251068	CNAG_03143		Uncharacterized protein		cytosol [GO:0005829]; nucleus [GO:0005634]; plasma membrane [GO:0005886]	lipid binding [GO:0008289]
J9VKI2	WT:uggt	TRUE	0.7	0.379162	23.6746	24.25	0.575365	0	1.49005	CNAG_00067		Protein translocase SEC61 complex gamma subunit	post-translational protein targeting to membrane, translocation [GO:0031204]	Ssh1 translocon complex [GO:0071261]	protein transmembrane transporter activity [GO:0008320]
J9VM43	WT:uggt	TRUE	0.4	0.278773	23.6537	23.2763	-0.37744	0	0.769803	CNAG_05236		Uncharacterized protein		cytoplasm [GO:0005737]; nucleus [GO:0005634]
J9VFP1	WT:uggt	TRUE	0.4	0.243678	26.911	26.739	-0.171961	0	0.887635	CNAG_03677		Uncharacterized protein
J9VE99	WT:uggt	TRUE	0.7	0.780088	11.7811	11.7125	-0.0685792	0	0.953577	CNAG_07337		Peptidase S9 prolyl oligopeptidase catalytic domain-containing protein	proteolysis [GO:0006508]		serine-type peptidase activity [GO:0008236]
J9VTB8	WT:uggt	TRUE	0.1	0.255652	19.1295	23.7708	4.64138	0	24.957	CNAG_06578		Uncharacterized protein
T2BLV7	WT:uggt	TRUE	0.1	0.326014	26.1054	20.5224	-5.58308	0	0.0208605	CNAG_02818		Aminomethyltransferase (EC 2.1.2.10) (Glycine cleavage system T protein)	glycine catabolic process [GO:0006546]	cytosol [GO:0005829]; mitochondrion [GO:0005739]	aminomethyltransferase activity [GO:0004047]; transaminase activity [GO:0008483]
J9VZ03	WT:uggt	TRUE	0.7	0.120924	25.3351	16.2	-9.13516	0	0.00177846	CNAG_04212		DUF1690 domain-containing protein
J9VWT0	WT:uggt	TRUE	0.1	0.0508746	21.7037	22.2399	0.536264	0	1.45021	CNAG_06487	CHS6	Chitin synthase 6 (EC 2.4.1.16)	cell wall organization [GO:0071555]; fungal-type cell wall chitin biosynthetic process [GO:0034221]	cell septum [GO:0030428]; plasma membrane [GO:0005886]	chitin synthase activity [GO:0004100]
J9VPZ0	WT:uggt	TRUE	0.7	0.495082	15.2889	19.1151	3.82622	0	14.1843	CNAG_02368		SAP domain-containing protein	exonucleolytic trimming to generate mature 3'-end of 5.8S rRNA from tricistronic rRNA transcript (SSU-rRNA, 5.8S rRNA, LSU-rRNA) [GO:0000467]; regulatory ncRNA-mediated gene silencing [GO:0031047]	cytoplasm [GO:0005737]	3'-5'-RNA exonuclease activity [GO:0000175]; nucleic acid binding [GO:0003676]
J9VTU2	WT:uggt	TRUE	0.4	0.330992	15.0654	11.7542	-3.31127	0	0.100742	CNAG_05696		E2 ubiquitin-conjugating enzyme (EC 2.3.2.23)	protein K48-linked ubiquitination [GO:0070936]	nucleus [GO:0005634]	ATP binding [GO:0005524]; ubiquitin conjugating enzyme activity [GO:0061631]
J9W028	WT:uggt	TRUE	0.7	0.315222	22.9539	22.6283	-0.325625	0	0.797953	CNAG_06080	SAC1	Inositol/phosphatidylinositol phosphatase	phosphatidylinositol dephosphorylation [GO:0046856]	endoplasmic reticulum [GO:0005783]; membrane [GO:0016020]	phosphatidylinositol-4-phosphate phosphatase activity [GO:0043812]
J9VN80	WT:uggt	TRUE	0.7	0.508161	11.871	11.5489	-0.322038	0	0.799939	CNAG_06617		Metallo-dependent phosphatase	nucleotide catabolic process [GO:0009166]		5'-nucleotidase activity [GO:0008253]; UDP-sugar diphosphatase activity [GO:0008768]
J9VSA2	WT:uggt	TRUE	0.1	0.00188899	24.9815	24.2289	-0.752601	0	0.593533	CNAG_05970		non-specific serine/threonine protein kinase (EC 2.7.11.1)	intracellular signal transduction [GO:0035556]; regulation of axonogenesis [GO:0050770]; regulation of MAPK cascade [GO:0043408]	cytoplasm [GO:0005737]	ATP binding [GO:0005524]; protein serine kinase activity [GO:0106310]; protein serine/threonine kinase activity [GO:0004674]
J9VNX0	WT:uggt	TRUE	0.2	0.259371	26.1457	25.5434	-0.602381	0	0.658666	CNAG_06638		Malic enzyme	malate metabolic process [GO:0006108]; pyruvate metabolic process [GO:0006090]	cytosol [GO:0005829]; mitochondrion [GO:0005739]	malate dehydrogenase (decarboxylating) (NAD+) activity [GO:0004471]; metal ion binding [GO:0046872]; NAD binding [GO:0051287]
J9VMW4	WT:uggt	TRUE	0.1	0.0582913	27.369	15.5747	-11.7943	0	0.00028156	CNAG_02783		HIG1 domain-containing protein	mitochondrial respirasome assembly [GO:0097250]	membrane [GO:0016020]; mitochondrion [GO:0005739]
T2BNT3	WT:uggt	TRUE	1	0.424385	11.2238	14.5501	3.32628	0	10.0302	CNAG_00877	ADK2	GTP:AMP phosphotransferase, mitochondrial (EC 2.7.4.10) (Adenylate kinase 3) (AK 3)	ADP biosynthetic process [GO:0006172]; AMP metabolic process [GO:0046033]; GTP metabolic process [GO:0046039]; ITP metabolic process [GO:0046041]	mitochondrial matrix [GO:0005759]	adenylate kinase activity [GO:0004017]; ATP binding [GO:0005524]; GTP binding [GO:0005525]; nucleoside triphosphate adenylate kinase activity [GO:0046899]
J9VUG3	WT:uggt	TRUE	0.2	0.106997	14.3348	21.2178	6.88301	0	118.03	CNAG_01901		Nudix hydrolase domain-containing protein
J9W0D4	WT:uggt	TRUE	0.2	0.185536	11.0594	11.8905	0.831147	0	1.7791	CNAG_06167		Metal homeostatis protein bsd2	metal ion transport [GO:0030001]; positive regulation of protein ubiquitination [GO:0031398]; ubiquitin-dependent protein catabolic process [GO:0006511]; vacuolar transport [GO:0007034]	endoplasmic reticulum [GO:0005783]; Golgi apparatus [GO:0005794]; membrane [GO:0016020]; perinuclear region of cytoplasm [GO:0048471]	WW domain binding [GO:0050699]
T2BQC2	WT:uggt	TRUE	0.1	0.311553	24.1653	19.6484	-4.51691	0	0.0436791	CNAG_00060		Chaperone regulator, variant	protein refolding [GO:0042026]	cytosol [GO:0005829]; nucleus [GO:0005634]	Hsp70 protein binding [GO:0030544]; metal ion binding [GO:0046872]; unfolded protein binding [GO:0051082]
J9VRX6	WT:uggt	TRUE	0.1	0.00978138	26.465	27.209	0.743955	0	1.67476	CNAG_05170		Zn(2)-C6 fungal-type domain-containing protein		nucleus [GO:0005634]	DNA-binding transcription factor activity, RNA polymerase II-specific [GO:0000981]; zinc ion binding [GO:0008270]
J9VX29	WT:uggt	TRUE	0.7	0.949016	18.129	18.5003	0.37123	0	1.29346	CNAG_05391		Centromere protein C	attachment of mitotic spindle microtubules to kinetochore [GO:0051315]; kinetochore assembly [GO:0051382]; spindle attachment to meiosis I kinetochore [GO:0051455]	kinetochore [GO:0000776]; nucleus [GO:0005634]	centromeric DNA binding [GO:0019237]
J9VS50	WT:uggt	TRUE	0.7	0.477489	22.1739	22.6126	0.438685	0	1.35537	CNAG_05921		Diacylglycerol O-acyltransferase (EC 2.3.1.20)	glycerol metabolic process [GO:0006071]; triglyceride biosynthetic process [GO:0019432]	endoplasmic reticulum membrane [GO:0005789]	diacylglycerol O-acyltransferase activity [GO:0004144]
J9VHM9	WT:uggt	TRUE	0.1	0.285068	23.1866	19.0039	-4.18276	0	0.0550635	CNAG_02989		PX domain-containing protein			phosphatidylinositol binding [GO:0035091]
J9VLG1	WT:uggt	TRUE	0.7	0.523043	11.2031	11.6076	0.404555	0	1.32368	CNAG_00387		Rab-GAP TBC domain-containing protein			GTPase activator activity [GO:0005096]
J9VLS3	WT:uggt	TRUE	0.1	0.132654	24.4124	23.7762	-0.636138	0	0.643433	CNAG_05111		Uncharacterized protein
J9VQN1	WT:uggt	TRUE	0.1	0.0953576	23.3528	15.176	-8.17679	0	0.00345573	CNAG_01257		Aldo-keto reductase	D-galacturonate catabolic process [GO:0019698]	cytosol [GO:0005829]	aldose reductase (NADPH) activity [GO:0004032]; D-galacturonate reductase activity [GO:0102098]
J9VTB0	WT:uggt	TRUE	0.1	0.0932972	22.3374	15.0861	-7.25133	0	0.00656346	CNAG_01208		High-affinity cell membrane calcium channel protein	calcium ion import across plasma membrane [GO:0098703]	neuronal cell body [GO:0043025]; voltage-gated calcium channel complex [GO:0005891]	high voltage-gated calcium channel activity [GO:0008331]
J9VSJ6	WT:uggt	TRUE	0.7	0.460105	22.3295	18.9886	-3.34091	0	0.0986928	CNAG_02229		Protein farnesyltransferase/geranylgeranyltransferase type-1 subunit alpha (EC 2.5.1.58) (EC 2.5.1.59) (CAAX farnesyltransferase subunit alpha) (FTase-alpha) (Ras proteins prenyltransferase subunit alpha) (Type I protein geranyl-geranyltransferase subunit alpha)		CAAX-protein geranylgeranyltransferase complex [GO:0005953]; protein farnesyltransferase complex [GO:0005965]	CAAX-protein geranylgeranyltransferase activity [GO:0004662]; protein farnesyltransferase activity [GO:0004660]
J9VYC7	WT:uggt	TRUE	0.7	0.126454	18.3862	12.0049	-6.3813	0	0.0119961	CNAG_03512		Mitochondrial K+-H+ exchange-related-domain-containing protein	potassium ion transport [GO:0006813]; proton transmembrane transport [GO:1902600]	membrane [GO:0016020]
J9VNN6	WT:uggt	TRUE	0.7	0.502602	21.7311	21.5858	-0.145348	0	0.904161	CNAG_01115		Golgi-body localization protein domain-containing protein
J9VTA0	WT:uggt	TRUE	1	0.906421	22.0099	22.0504	0.0404882	0	1.02846	CNAG_07433		Uncharacterized protein		nucleus [GO:0005634]
J9VLI7	WT:uggt	TRUE	0.1	0.258407	18.8684	24.4047	5.53627	0	46.407	CNAG_02487		Very-long-chain (3R)-3-hydroxyacyl-CoA dehydratase (EC 4.2.1.134)	fatty acid elongation [GO:0030497]; sphingolipid biosynthetic process [GO:0030148]; very long-chain fatty acid biosynthetic process [GO:0042761]	endoplasmic reticulum membrane [GO:0005789]	very-long-chain (3R)-3-hydroxyacyl-CoA dehydratase activity [GO:0102158]
J9VPS6	WT:uggt	TRUE	0.7	0.498254	23.2676	20.2693	-2.9983	0	0.125148	CNAG_02443		NADH dehydrogenase		mitochondrial respiratory chain complex I [GO:0005747]
J9VLD5	WT:uggt	TRUE	0.7	0.791993	27.3379	27.1564	-0.18152	0	0.881774	CNAG_01083		26S proteasome regulatory subunit N5		cytoplasm [GO:0005737]; proteasome regulatory particle, lid subcomplex [GO:0008541]
J9VQV9	WT:uggt	TRUE	0.7	0.432797	23.5004	23.5915	0.0911632	0	1.06523	CNAG_04120		RNA polymerase II subunit A C-terminal domain phosphatase (EC 3.1.3.16)		nucleus [GO:0005634]	myosin phosphatase activity [GO:0017018]; RNA polymerase II CTD heptapeptide repeat phosphatase activity [GO:0008420]
J9VLU4	WT:uggt	TRUE	1	0.966697	14.6069	14.8028	0.195903	0	1.14544	CNAG_00538		37S ribosomal protein mrp10, mitochondrial	mitochondrial translation [GO:0032543]	mitochondrial small ribosomal subunit [GO:0005763]	structural constituent of ribosome [GO:0003735]
J9VLN4	WT:uggt	TRUE	0.4	0.125858	11.4734	17.9951	6.52171	0	91.8818	CNAG_00979	CTR4	Copper transport protein CTR4 (Copper transporter 4)		plasma membrane [GO:0005886]	copper ion transmembrane transporter activity [GO:0005375]
J9VFA5	WT:uggt	TRUE	0.4	0.286122	23.9473	24.2965	0.349235	0	1.27388	CNAG_06778		Serine-threonine kinase receptor-associated protein	spliceosomal snRNP assembly [GO:0000387]	SMN complex [GO:0032797]	kinase activity [GO:0016301]; RNA binding [GO:0003723]
T2BPZ1	WT:uggt	TRUE	0.1	0.0566829	24.5237	27.4125	2.88887	0	7.4069	CNAG_08016		Cytochrome b5 heme-binding domain-containing protein		endoplasmic reticulum [GO:0005783]; membrane [GO:0016020]
J9VS18	WT:uggt	TRUE	0.1	0.103196	30.6042	28.5866	-2.01754	0	0.24698	CNAG_04327		K Homology domain-containing protein	nuclear division [GO:0000280]	cytoplasm [GO:0005737]; nucleus [GO:0005634]	mRNA binding [GO:0003729]
J9VJ19	WT:uggt	TRUE	0.7	0.23161	23.3304	23.7394	0.408993	0	1.32776	CNAG_04957		RRM Nup35-type domain-containing protein	mRNA transport [GO:0051028]; NLS-bearing protein import into nucleus [GO:0006607]; nuclear pore organization [GO:0006999]	nuclear membrane [GO:0031965]; nuclear pore central transport channel [GO:0044613]; nuclear pore nuclear basket [GO:0044615]	nucleic acid binding [GO:0003676]; phospholipid binding [GO:0005543]; structural constituent of nuclear pore [GO:0017056]
J9VN71	WT:uggt	TRUE	0.7	0.624604	25.222	24.9631	-0.25895	0	0.835696	CNAG_06606		Rho family protein	small GTPase-mediated signal transduction [GO:0007264]	cytosol [GO:0005829]	GTP binding [GO:0005525]; GTPase activity [GO:0003924]; protein kinase binding [GO:0019901]
J9VPZ3	WT:uggt	TRUE	0.4	0.219401	24.6979	23.9791	-0.718873	0	0.607572	CNAG_07410		polynucleotide adenylyltransferase (EC 2.7.7.19)	RNA 3'-end processing [GO:0031123]		poly(A) RNA polymerase activity [GO:1990817]
J9VS59	WT:uggt	TRUE	0.1	0.178827	21.3713	23.4994	2.12816	0	4.37159	CNAG_02409		Protein YOP1		membrane [GO:0016020]
J9VZN8	WT:uggt	TRUE	0.2	0.138827	26.6509	25.7709	-0.879999	0	0.543368	CNAG_01949		L-arabinitol 4-dehydrogenase (EC 1.1.1.12)	arabinose catabolic process [GO:0019568]; sorbitol catabolic process [GO:0006062]		L-iditol 2-dehydrogenase activity [GO:0003939]; zinc ion binding [GO:0008270]
J9VH22	WT:uggt	TRUE	0.1	0.231069	27.4277	25.5389	-1.88886	0	0.270021	CNAG_03948		NAD(P)H:quinone oxidoreductase, type IV		membrane [GO:0016020]	FMN binding [GO:0010181]; NAD(P)H dehydrogenase (quinone) activity [GO:0003955]
J9VSX0	WT:uggt	TRUE	0.1	0.233085	18.9712	24.1567	5.18544	0	36.3892	CNAG_01322		WHIM1 domain-containing protein		nucleus [GO:0005634]
J9VJ57	WT:uggt	TRUE	0.7	0.616473	11.6384	11.2895	-0.348871	0	0.785199	CNAG_00503		Uncharacterized protein		membrane [GO:0016020]
J9VHR9	WT:uggt	TRUE	0.1	0.0324536	23.0746	22.7693	-0.305384	0	0.809227	CNAG_00026		Kynurenine aminotransferase	biosynthetic process [GO:0009058]	mitochondrion [GO:0005739]	kynurenine-oxoglutarate transaminase activity [GO:0016212]; pyridoxal phosphate binding [GO:0030170]
J9VRL6	WT:uggt	TRUE	0.7	0.646286	14.0483	15.8286	1.78034	0	3.43507	CNAG_04376		Protein KRI1	endonucleolytic cleavage in ITS1 to separate SSU-rRNA from 5.8S rRNA and LSU-rRNA from tricistronic rRNA transcript (SSU-rRNA, 5.8S rRNA, LSU-rRNA) [GO:0000447]	90S preribosome [GO:0030686]; nucleolus [GO:0005730]
J9VNG2	WT:uggt	TRUE	0.1	0.0860478	24.0371	15.3764	-8.66078	0	0.00247085	CNAG_02022		DNA-directed RNA polymerase II subunit RPB3		RNA polymerase II, core complex [GO:0005665]	DNA binding [GO:0003677]; protein dimerization activity [GO:0046983]; RNA polymerase II activity [GO:0001055]
J9VQM5	WT:uggt	TRUE	0.4	0.35596	25.1836	24.412	-0.771635	0	0.585753	CNAG_02097		UBX domain-containing protein	glucose homeostasis [GO:0042593]; intracellular protein transport [GO:0006886]	cytoplasm [GO:0005737]; nucleus [GO:0005634]; vesicle membrane [GO:0012506]
J9VVH1	WT:uggt	TRUE	0.2	0.288462	11.6951	13.4278	1.73267	0	3.32343	CNAG_06219		NEDD8-activating enzyme E1 regulatory subunit	protein neddylation [GO:0045116]	cytoplasm [GO:0005737]	NEDD8 activating enzyme activity [GO:0019781]
J9VF25	WT:uggt	TRUE	0.4	0.953056	19.1937	18.8776	-0.316087	0	0.803245	CNAG_00557	LSM8	U6 snRNA-associated Sm-like protein LSm8	mRNA splicing, via spliceosome [GO:0000398]	precatalytic spliceosome [GO:0071011]; U4/U6 x U5 tri-snRNP complex [GO:0046540]; U6 snRNP [GO:0005688]	RNA binding [GO:0003723]
J9VRY9	WT:uggt	TRUE	0.2	0.323521	18.3882	22.3219	3.93374	0	15.2818	CNAG_07679		Transcription elongation factor	regulation of mRNA 3'-end processing [GO:0031440]; transcription antitermination [GO:0031564]; transcription elongation by RNA polymerase I [GO:0006362]; transcription elongation by RNA polymerase II [GO:0006368]	nucleus [GO:0005634]	RNA polymerase II complex recruiting activity [GO:0001139]; RNA polymerase II transcription regulatory region sequence-specific DNA binding [GO:0000977]; translation elongation factor activity [GO:0003746]; zinc ion binding [GO:0008270]
J9VPE8	WT:uggt	TRUE	0.7	0.620645	24.472	23.8771	-0.59493	0	0.662076	CNAG_05809		Ferrochelatase (EC 4.98.1.1)	heme biosynthetic process [GO:0006783]	mitochondrial inner membrane [GO:0005743]	ferrochelatase activity [GO:0004325]
J9VMP0	WT:uggt	TRUE	0.7	0.481767	24.2635	23.6388	-0.624736	0	0.648538	CNAG_02072		Integral membrane protein		membrane [GO:0016020]
J9VV75	WT:uggt	TRUE	0.1	0.222977	27.6083	20.3282	-7.28012	0	0.00643378	CNAG_03263		Elongation factor Tu	mitochondrial translational elongation [GO:0070125]	cytosol [GO:0005829]; mitochondrion [GO:0005739]	GTP binding [GO:0005525]; GTPase activity [GO:0003924]; translation elongation factor activity [GO:0003746]
J9VQ05	WT:uggt	TRUE	1	0.393338	15.1285	11.5726	-3.55583	0	0.0850334	CNAG_02906		E2 ubiquitin-conjugating enzyme (EC 2.3.2.23)			ATP binding [GO:0005524]; ubiquitin conjugating enzyme activity [GO:0061631]
J9VRT5	WT:uggt	TRUE	0.1	0.061796	25.4251	24.2036	-1.22148	0	0.428844	CNAG_05125		Diphosphomevalonate decarboxylase (EC 4.1.1.33)	isopentenyl diphosphate biosynthetic process, mevalonate pathway [GO:0019287]; sterol biosynthetic process [GO:0016126]	cytosol [GO:0005829]	ATP binding [GO:0005524]; diphosphomevalonate decarboxylase activity [GO:0004163]
J9VSW0	WT:uggt	TRUE	0.4	0.548159	14.9712	18.5233	3.55209	0	11.7297	CNAG_02115		Nonhistone protein 6	regulation of transcription by RNA polymerase II [GO:0006357]	nucleus [GO:0005634]	DNA binding, bending [GO:0008301]
J9VSM1	WT:uggt	TRUE	0.4	0.347579	17.1841	20.0855	2.90137	0	7.47137	CNAG_02201		WH2 domain-containing protein			actin binding [GO:0003779]
J9VF80	WT:uggt	TRUE	0.1	0.057126	28.0467	26.9573	-1.0894	0	0.469956	CNAG_07373		Carbamoyl-phosphate synthase, large subunit	'de novo' pyrimidine nucleobase biosynthetic process [GO:0006207]; 'de novo' UMP biosynthetic process [GO:0044205]; citrulline biosynthetic process [GO:0019240]; glutamine metabolic process [GO:0006541]; UTP biosynthetic process [GO:0006228]	cytosol [GO:0005829]	amino acid binding [GO:0016597]; aspartate carbamoyltransferase activity [GO:0004070]; ATP binding [GO:0005524]; carbamoyl-phosphate synthase (glutamine-hydrolyzing) activity [GO:0004088]; dihydroorotase activity [GO:0004151]; metal ion binding [GO:0046872]
J9VS43	WT:uggt	TRUE	0.2	0.278335	16.3007	19.8827	3.58206	0	11.9759	CNAG_04352		Zinc-finger protein	smoothened signaling pathway [GO:0007224]	nucleus [GO:0005634]	DNA-binding transcription factor activity, RNA polymerase II-specific [GO:0000981]; metal ion binding [GO:0046872]; RNA polymerase II cis-regulatory region sequence-specific DNA binding [GO:0000978]
J9VTU7	WT:uggt	TRUE	0.4	0.322737	26.7095	25.5729	-1.13661	0	0.454826	CNAG_05701	TPM1	Actin lateral binding protein
J9VJC0	WT:uggt	TRUE	0.1	0.173933	27.0021	26.2167	-0.785382	0	0.580198	CNAG_05059		Pyruvate dehydrogenase E1 component subunit beta (EC 1.2.4.1)	acetyl-CoA biosynthetic process from pyruvate [GO:0006086]		pyruvate dehydrogenase (acetyl-transferring) activity [GO:0004739]
J9VPP4	WT:uggt	TRUE	0.4	0.351994	10.8313	11.3659	0.534654	0	1.44859	CNAG_03012		Uncharacterized protein
J9VVK5	WT:uggt	TRUE	0.7	0.143422	22.2774	15.183	-7.09444	0	0.00731748	CNAG_03425		Uncharacterized protein	apoptotic process [GO:0006915]; negative regulation of apoptotic process [GO:0043066]	nucleus [GO:0005634]	mRNA binding [GO:0003729]
J9VP01	WT:uggt	TRUE	0.1	0.052288	26.5722	25.7453	-0.826847	0	0.56376	CNAG_05892		Phosphoglycerate mutase	ribose phosphate biosynthetic process [GO:0046390]		sedoheptulose-bisphosphatase activity [GO:0050278]
T2BQ21	WT:uggt	TRUE	1	0.408445	19.3369	16.6072	-2.72964	0	0.150764	CNAG_08022		CMGC/CDK/CDK5 protein kinase	axonogenesis [GO:0007409]; neuron apoptotic process [GO:0051402]; synaptic vesicle transport [GO:0048489]; vesicle-mediated transport [GO:0016192]	cytoplasm [GO:0005737]; nucleus [GO:0005634]	ATP binding [GO:0005524]; cyclin-dependent protein serine/threonine kinase activity [GO:0004693]
J9VLB6	WT:uggt	TRUE	0.4	0.331369	15.5722	11.4923	-4.07987	0	0.0591339	CNAG_01108		Allantoicase	allantoin catabolic process [GO:0000256]; purine nucleobase metabolic process [GO:0006144]		allantoicase activity [GO:0004037]; ureidoglycolate hydrolase activity [GO:0004848]; ureidoglycolate lyase activity [GO:0050385]
J9VUR9	WT:uggt	TRUE	0.1	0.0660218	26.6156	23.5296	-3.08604	0	0.117763	CNAG_04441		Polyadenylate-binding protein (PABP)		cytosol [GO:0005829]; nucleus [GO:0005634]; ribonucleoprotein complex [GO:1990904]	mRNA 3'-UTR binding [GO:0003730]; poly(A) binding [GO:0008143]; poly(U) RNA binding [GO:0008266]
J9VFN3	WT:uggt	TRUE	0.1	0.0229681	23.9068	24.6807	0.773903	0	1.70989	CNAG_03667		Uncharacterized protein
J9VY08	WT:uggt	TRUE	0.1	0.205515	24.9249	23.08	-1.84491	0	0.278374	CNAG_06072		Chorismate mutase (EC 5.4.99.5)	chorismate metabolic process [GO:0046417]; tyrosine biosynthetic process [GO:0006571]	cytoplasm [GO:0005737]	chorismate mutase activity [GO:0004106]
J9VRJ7	WT:uggt	TRUE	0.7	0.76179	14.0589	15.7549	1.69597	0	3.23996	CNAG_04351		methylmalonate-semialdehyde dehydrogenase (CoA acylating) (EC 1.2.1.27)	thymine catabolic process [GO:0006210]; valine catabolic process [GO:0006574]	mitochondrion [GO:0005739]	malonate-semialdehyde dehydrogenase (acetylating) activity [GO:0018478]; methylmalonate-semialdehyde dehydrogenase (acylating, NAD) activity [GO:0004491]
J9VR61	WT:uggt	TRUE	0.7	0.993407	23.7519	23.7493	-0.00255212	0	0.998233	CNAG_04190		DNA topoisomerase I (EC 5.6.2.1) (DNA topoisomerase 1)	chromosome segregation [GO:0007059]; DNA replication [GO:0006260]; DNA topological change [GO:0006265]	chromosome [GO:0005694]; nucleolus [GO:0005730]	DNA binding [GO:0003677]; DNA topoisomerase type I (single strand cut, ATP-independent) activity [GO:0003917]
J9VIW2	WT:uggt	TRUE	0.1	0.0722808	25.4154	24.1688	-1.24662	0	0.421434	CNAG_00386		Translation initiation factor 4G		eukaryotic translation initiation factor 4F complex [GO:0016281]	mRNA binding [GO:0003729]; translation initiation factor activity [GO:0003743]
J9VIG9	WT:uggt	TRUE	0.1	0.0936239	19.6187	11.025	-8.59373	0	0.00258839	CNAG_02706		Uncharacterized protein
J9VQ13	WT:uggt	TRUE	0.1	0.255582	24.9838	19.5695	-5.41427	0	0.02345	CNAG_01439		U4/U6 small nuclear ribonucleoprotein PRP4	mRNA splicing, via spliceosome [GO:0000398]	U4/U6 x U5 tri-snRNP complex [GO:0046540]	U4 snRNA binding [GO:0030621]; U6 snRNA binding [GO:0017070]
J9VR76	WT:uggt	TRUE	0.1	0.357917	30.6631	29.2447	-1.41847	0	0.374109	CNAG_04209		Voltage-gated potassium channel protein beta-2 subunit	monoatomic ion transmembrane transport [GO:0034220]; regulation of potassium ion transmembrane transport [GO:1901379]	voltage-gated potassium channel complex [GO:0008076]	aldo-keto reductase (NADPH) activity [GO:0004033]; potassium channel regulator activity [GO:0015459]; transmembrane transporter binding [GO:0044325]
J9VY34	WT:uggt	TRUE	0.7	0.748611	30.1284	30.3213	0.192922	0	1.14308	CNAG_06101		ADP/ATP translocase (ADP,ATP carrier protein)	mitochondrial ADP transmembrane transport [GO:0140021]; mitochondrial ATP transmembrane transport [GO:1990544]; negative regulation of mitochondrial outer membrane permeabilization involved in apoptotic signaling pathway [GO:1901029]	mitochondrial inner membrane [GO:0005743]	ATP:ADP antiporter activity [GO:0005471]
J9VVW9	WT:uggt	TRUE	0.1	0.22297	26.5752	19.9284	-6.64674	0	0.00998006	CNAG_04666		26S protease regulatory subunit 8	proteasome-mediated ubiquitin-dependent protein catabolic process [GO:0043161]	cytoplasm [GO:0005737]; nucleus [GO:0005634]; proteasome regulatory particle, base subcomplex [GO:0008540]	ATP binding [GO:0005524]; ATP hydrolysis activity [GO:0016887]; peptidase activity [GO:0008233]; proteasome-activating activity [GO:0036402]
J9VTJ0	WT:uggt	TRUE	0.7	0.384267	12.1704	14.3461	2.17574	0	4.51816	CNAG_01567		DUF1688-domain-containing protein
J9VPW0	WT:uggt	TRUE	0.4	0.156174	17.4015	11.3792	-6.02236	0	0.0153847	CNAG_03276		UPF3 domain-containing protein	nuclear-transcribed mRNA catabolic process, nonsense-mediated decay [GO:0000184]; positive regulation of translation [GO:0045727]	cytoplasm [GO:0005737]; nucleolus [GO:0005730]	mRNA binding [GO:0003729]
J9VZS9	WT:uggt	TRUE	0.7	0.235156	14.8598	11.7502	-3.10967	0	0.11585	CNAG_05515		Uncharacterized protein
J9VTJ4	WT:uggt	TRUE	0.1	0.171124	18.1671	23.6783	5.51125	0	45.6091	CNAG_07664		Mitochondrial protein	mitochondrial respiratory chain complex assembly [GO:0033108]; protein insertion into mitochondrial outer membrane [GO:0045040]	mitochondrial outer membrane [GO:0005741]
J9VM84	WT:uggt	TRUE	0.4	0.143756	17.5884	11.6054	-5.98307	0	0.0158094	CNAG_02983		Proteophosphoglycan ppg4
J9VZH8	WT:uggt	TRUE	0.4	0.289617	11.5309	11.9994	0.468509	0	1.38368	CNAG_05428		Transcription initiation factor TFIID subunit 5	transcription initiation at RNA polymerase II promoter [GO:0006367]	transcription factor TFIID complex [GO:0005669]	RNA polymerase II general transcription initiation factor activity [GO:0016251]; translation initiation factor activity [GO:0003743]
J9VWR6	WT:uggt	TRUE	0.2	0.0740493	10.857	11.8731	1.01614	0	2.0225	CNAG_04323		Conjugation with cellular fusion-related protein		membrane [GO:0016020]	transmembrane transporter activity [GO:0022857]
J9VGA2	WT:uggt	TRUE	0.2	0.333044	10.7415	14.8869	4.14535	0	17.696	CNAG_03663		L-lactate dehydrogenase	lactate metabolic process [GO:0006089]		heme binding [GO:0020037]; L-lactate dehydrogenase (cytochrome) activity [GO:0004460]; metal ion binding [GO:0046872]
J9VLU6	WT:uggt	TRUE	0.7	0.177774	17.5074	11.8326	-5.67473	0	0.0195766	CNAG_02396		NF-kappa-B-activating protein C-terminal domain-containing protein	regulation of gene expression [GO:0010468]	nucleus [GO:0005634]	chromatin binding [GO:0003682]
J9VSR3	WT:uggt	TRUE	0.7	0.133379	21.9136	15.3039	-6.60977	0	0.0102391	CNAG_02156		Uncharacterized protein		membrane [GO:0016020]
J9VU60	WT:uggt	TRUE	1	0.813445	24.1893	24.0267	-0.162626	0	0.893397	CNAG_01769		Solute carrier family 25 (Mitochondrial aspartate/glutamate transporter), member 12/13	malate-aspartate shuttle [GO:0043490]	mitochondrial inner membrane [GO:0005743]	calcium ion binding [GO:0005509]; L-aspartate transmembrane transporter activity [GO:0015183]; L-glutamate transmembrane transporter activity [GO:0005313]
J9VLM3	WT:uggt	TRUE	0.1	0.299557	24.2197	23.5945	-0.625172	0	0.648342	CNAG_03974		NmrA-like domain-containing protein		nucleus [GO:0005634]
J9VEJ2	WT:uggt	TRUE	0.2	0.293436	17.6155	22.0121	4.39662	0	21.0627	CNAG_07375		Guanyl-nucleotide exchange factor	vesicle-mediated transport [GO:0016192]	cytosol [GO:0005829]; endocytic vesicle [GO:0030139]	guanyl-nucleotide exchange factor activity [GO:0005085]; small GTPase binding [GO:0031267]
J9W1G1	WT:uggt	TRUE	1	0.390727	23.4956	19.7666	-3.72899	0	0.0754156	CNAG_01686		D-lactate dehydratase (EC 4.2.1.130)	methylglyoxal catabolic process to D-lactate via S-lactoyl-glutathione [GO:0019243]	cytoplasm [GO:0005737]	glyoxalase III activity [GO:0019172]
J9W1R3	WT:uggt	TRUE	0.1	0.300869	18.3583	22.526	4.16767	0	17.9718	CNAG_05499		SHO1 osmosensor		plasma membrane [GO:0005886]
J9VU01	WT:uggt	TRUE	0.4	0.484337	13.9893	17.7276	3.73831	0	13.3458	CNAG_05769		Cytoplasmic protein
J9VGL6	WT:uggt	TRUE	0.4	0.386049	24.8054	24.4575	-0.347913	0	0.78572	CNAG_00342		SUZ domain-containing protein			nucleic acid binding [GO:0003676]
J9VUX3	WT:uggt	TRUE	0.1	0.0846761	23.3733	16.9679	-6.40533	0	0.0117979	CNAG_06049	RYH1	GTP-binding protein ryh1	vesicle-mediated transport [GO:0016192]		GTP binding [GO:0005525]; GTPase activity [GO:0003924]
J9VVM8	WT:uggt	TRUE	0.7	0.790622	23.3398	23.2475	-0.0923908	0	0.937967	CNAG_06093		Protein transporter SEC24	COPII-coated vesicle cargo loading [GO:0090110]; intracellular protein transport [GO:0006886]	COPII vesicle coat [GO:0030127]; endoplasmic reticulum exit site [GO:0070971]	SNARE binding [GO:0000149]; zinc ion binding [GO:0008270]
J9VYZ3	WT:uggt	TRUE	0.4	0.127328	19.538	11.3629	-8.17503	0	0.00345997	CNAG_04198		Uncharacterized protein
J9VTJ6	WT:uggt	TRUE	0.2	0.111945	24.7364	23.3861	-1.35029	0	0.392213	CNAG_01106		V-type proton ATPase subunit a	vacuolar acidification [GO:0007035]	fungal-type vacuole membrane [GO:0000329]; plasma membrane [GO:0005886]; vacuolar proton-transporting V-type ATPase, V0 domain [GO:0000220]	ATPase binding [GO:0051117]; proton-transporting ATPase activity, rotational mechanism [GO:0046961]
J9VH70	WT:uggt	TRUE	0.1	0.331929	15.2967	11.4608	-3.83598	0	0.0700254	CNAG_00591		Calpain catalytic domain-containing protein	proteolysis [GO:0006508]		calcium-dependent cysteine-type endopeptidase activity [GO:0004198]
J9VK44	WT:uggt	TRUE	0.2	0.119474	25.8007	25.36	-0.440632	0	0.736812	CNAG_02880		Obg-like ATPase 1		cytoplasm [GO:0005737]	ATP binding [GO:0005524]; ATP hydrolysis activity [GO:0016887]; GTP binding [GO:0005525]; ribosomal large subunit binding [GO:0043023]
J9W1M8	WT:uggt	TRUE	0.1	0.0949538	26.1233	16.1585	-9.96476	0	0.00100071	CNAG_01798		Phosphatase activator		nucleus [GO:0005634]	RNA binding [GO:0003723]
J9VWA1	WT:uggt	TRUE	0.1	0.192333	24.7358	18.8617	-5.87411	0	0.0170497	CNAG_06288		RNA binding protein	mRNA splicing, via spliceosome [GO:0000398]	U1 snRNP [GO:0005685]; U2 snRNP [GO:0005686]	U1 snRNA binding [GO:0030619]
J9W183	WT:uggt	TRUE	0.7	0.142603	27.0692	25.3544	-1.71474	0	0.304657	CNAG_01630		Polyadenylation factor subunit 2	mRNA 3'-end processing [GO:0031124]	mRNA cleavage and polyadenylation specificity factor complex [GO:0005847]
J9VRV1	WT:uggt	TRUE	0.4	0.229252	26.0327	25.6334	-0.399268	0	0.758243	CNAG_02485		ATP synthase subunit gamma		mitochondrial proton-transporting ATP synthase complex, catalytic sector F(1) [GO:0000275]	proton-transporting ATP synthase activity, rotational mechanism [GO:0046933]
J9VWR9	WT:uggt	TRUE	0.7	0.151276	21.2386	14.8486	-6.38998	0	0.0119241	CNAG_04328		Ubiquitin-conjugating enzyme E2 I	protein sumoylation [GO:0016925]	nucleus [GO:0005634]	ATP binding [GO:0005524]; SUMO conjugating enzyme activity [GO:0061656]
Q85T02	WT:uggt	TRUE	0.7	0.125337	21.6262	15.3181	-6.30805	0	0.0126209	CNAG_09005		NADH-ubiquinone oxidoreductase chain 4 (EC 7.1.1.2)	ATP synthesis coupled electron transport [GO:0042773]; electron transport coupled proton transport [GO:0015990]	mitochondrial membrane [GO:0031966]; respiratory chain complex I [GO:0045271]	NADH dehydrogenase (ubiquinone) activity [GO:0008137]; ubiquinone binding [GO:0048039]
J9VIA4	WT:uggt	TRUE	0.4	0.325219	15.1056	10.9992	-4.10639	0	0.0580569	CNAG_07323		Splicing factor Cactin	mRNA cis splicing, via spliceosome [GO:0045292]	cytoplasm [GO:0005737]; spliceosomal complex [GO:0005681]
J9VGC5	WT:uggt	TRUE	0.2	0.354707	23.2424	19.0328	-4.20963	0	0.0540476	CNAG_03693		Large ribosomal subunit protein uL11m	translation [GO:0006412]	mitochondrial large ribosomal subunit [GO:0005762]	large ribosomal subunit rRNA binding [GO:0070180]; structural constituent of ribosome [GO:0003735]
J9VRQ3	WT:uggt	TRUE	0.7	0.430577	24.67	20.8735	-3.79658	0	0.0719641	CNAG_02529		N-terminal Ras-GEF domain-containing protein	mitochondrial proton-transporting ATP synthase complex assembly [GO:0033615]	mitochondrial matrix [GO:0005759]	guanyl-nucleotide exchange factor activity [GO:0005085]
J9VU20	WT:uggt	TRUE	1	0.641417	24.6159	24.3881	-0.227815	0	0.853927	CNAG_04151		Oxysterol-binding protein	endocytosis [GO:0006897]; exocytosis [GO:0006887]; lipid transport [GO:0006869]; maintenance of cell polarity [GO:0030011]; piecemeal microautophagy of the nucleus [GO:0034727]	cytosol [GO:0005829]; nuclear envelope [GO:0005635]; perinuclear endoplasmic reticulum [GO:0097038]; plasma membrane [GO:0005886]	sterol binding [GO:0032934]
J9W2Q3	WT:uggt	TRUE	0.2	0.0656673	24.3401	23.3292	-1.01095	0	0.496219	CNAG_06168		S-(hydroxymethyl)glutathione dehydrogenase (EC 1.1.1.284)	formaldehyde catabolic process [GO:0046294]	cytosol [GO:0005829]	alcohol dehydrogenase (NAD+) activity, zinc-dependent [GO:0004024]; S-(hydroxymethyl)glutathione dehydrogenase (NAD+) activity [GO:0106322]; S-(hydroxymethyl)glutathione dehydrogenase (NADP+) activity [GO:0106321]; zinc ion binding [GO:0008270]
J9VVZ9	WT:uggt	TRUE	0.7	0.257478	26.3158	26.47	0.154199	0	1.1128	CNAG_03577		60S acidic ribosomal protein P0	cytoplasmic translation [GO:0002181]; ribosome biogenesis [GO:0042254]	cytosolic large ribosomal subunit [GO:0022625]	large ribosomal subunit rRNA binding [GO:0070180]; structural constituent of ribosome [GO:0003735]
J9VPG5	WT:uggt	TRUE	0.4	0.27887	26.1138	25.3933	-0.720549	0	0.606867	CNAG_03146		Alpha-amylase	carbohydrate metabolic process [GO:0005975]	extracellular space [GO:0005615]	alpha-amylase activity [GO:0004556]; calcium ion binding [GO:0005509]
T2BNF1	WT:uggt	TRUE	0.7	0.396466	20.9947	17.7123	-3.28234	0	0.102782	CNAG_05078		tRNA '-O-ribosylphosphate transferase, variant 3	charged-tRNA amino acid modification [GO:0019988]	cytoplasm [GO:0005737]	tRNA adenosine(64)-2'-O-ribosylphosphate transferase activity [GO:0043399]
J9W3S6	WT:uggt	TRUE	0.1	0.0806087	27.4178	19.2357	-8.18215	0	0.00344292	CNAG_05437		Nascent polypeptide-associated complex subunit beta		cytosol [GO:0005829]; nascent polypeptide-associated complex [GO:0005854]; nucleus [GO:0005634]
J9VPA2	WT:uggt	TRUE	0.2	0.214471	24.0142	24.2058	0.191598	0	1.14203	CNAG_00869	AFR2	ABC multidrug transporter AFR2	aggregation involved in sorocarp development [GO:0031152]; sorocarp morphogenesis [GO:0031288]	plasma membrane [GO:0005886]	ABC-type transporter activity [GO:0140359]; ATP binding [GO:0005524]; ATP hydrolysis activity [GO:0016887]
J9VRL2	WT:uggt	TRUE	0.1	0.00607672	23.5064	24.2725	0.766072	0	1.70063	CNAG_05090		Quinone oxidoreductase			NADPH binding [GO:0070402]; NADPH:quinone reductase activity [GO:0003960]; quinone binding [GO:0048038]
J9VZ19	WT:uggt	TRUE	0.1	0.216236	24.6273	23.0109	-1.61642	0	0.326143	CNAG_06469	APT1	Phospholipid-transporting ATPase (EC 7.6.2.1)	phospholipid translocation [GO:0045332]	plasma membrane [GO:0005886]; trans-Golgi network [GO:0005802]	ATP binding [GO:0005524]; ATP hydrolysis activity [GO:0016887]; magnesium ion binding [GO:0000287]; phosphatidylethanolamine flippase activity [GO:0090555]
J9VTL0	WT:uggt	TRUE	0.1	0.063246	26.2264	23.4811	-2.74531	0	0.149135	CNAG_01091		U5 small nuclear ribonucleoprotein component	mRNA splicing, via spliceosome [GO:0000398]	cytosol [GO:0005829]; U2-type catalytic step 2 spliceosome [GO:0071007]; U4/U6 x U5 tri-snRNP complex [GO:0046540]	GTP binding [GO:0005525]; GTPase activity [GO:0003924]; U5 snRNA binding [GO:0030623]
J9VUX7	WT:uggt	TRUE	0.1	0.045682	22.3798	23.0632	0.683448	0	1.60597	CNAG_01867		Mitochondrial division protein 1		Set1C/COMPASS complex [GO:0048188]	histone binding [GO:0042393]
J9VUZ4	WT:uggt	TRUE	0.1	0.00741943	23.4024	24.1397	0.737289	0	1.66704	CNAG_04522		Phospholipid/glycerol acyltransferase domain-containing protein		membrane [GO:0016020]	acyltransferase activity [GO:0016746]
J9VN13	WT:uggt	TRUE	0.7	0.966274	28.1235	28.1068	-0.0166902	0	0.988498	CNAG_06576		Allergen
J9VMM5	WT:uggt	TRUE	0.1	0.10554	23.8208	22.4644	-1.35634	0	0.390572	CNAG_01442		cysteine desulfurase (EC 2.8.1.7)	[2Fe-2S] cluster assembly [GO:0044571]	cytosol [GO:0005829]; mitochondrion [GO:0005739]; nucleus [GO:0005634]	cysteine desulfurase activity [GO:0031071]; iron-sulfur cluster binding [GO:0051536]; metal ion binding [GO:0046872]; pyridoxal phosphate binding [GO:0030170]
J9VVK7	WT:uggt	TRUE	0.7	0.183482	11.0166	11.6737	0.657139	0	1.57695	CNAG_06985		beta-glucosidase (EC 3.2.1.21)	cellulose catabolic process [GO:0030245]		beta-glucosidase activity [GO:0008422]; scopolin beta-glucosidase activity [GO:0102483]
J9VKK1	WT:uggt	TRUE	1	0.905541	14.7728	14.1218	-0.65096	0	0.636856	CNAG_02745		RNase III domain-containing protein	apoptotic DNA fragmentation [GO:0006309]; pre-miRNA processing [GO:0031054]; siRNA processing [GO:0030422]	cytoplasm [GO:0005737]; nucleus [GO:0005634]; RISC complex [GO:0016442]	ATP binding [GO:0005524]; deoxyribonuclease I activity [GO:0004530]; helicase activity [GO:0004386]; ribonuclease III activity [GO:0004525]; RNA binding [GO:0003723]
J9W0Z7	WT:uggt	TRUE	0.4	0.457912	11.1847	11.5918	0.40706	0	1.32598	CNAG_06406		Uncharacterized protein	protein O-linked glycosylation [GO:0006493]		protein O-acetylglucosaminyltransferase activity [GO:0097363]
J9VKN6	WT:uggt	TRUE	0.1	0.0919523	26.1489	24.6506	-1.49832	0	0.353966	CNAG_02704		Uncharacterized protein		membrane [GO:0016020]
J9VMB5	WT:uggt	TRUE	0.1	0.00019821	26.521	27.4579	0.936877	0	1.91438	CNAG_05314		ADP-ribosylation factor GTPase-activating protein 2/3	COPI coating of Golgi vesicle [GO:0048205]; endoplasmic reticulum organization [GO:0007029]	Golgi membrane [GO:0000139]	GTPase activator activity [GO:0005096]
J9VPY5	WT:uggt	TRUE	0.7	0.420082	20.3686	17.2785	-3.09016	0	0.117427	CNAG_03301		Mitochondrial import inner membrane translocase subunit	protein transport [GO:0015031]	mitochondrial inner membrane [GO:0005743]
J9VM80	WT:uggt	TRUE	0.1	0.179449	21.4937	16.8288	-4.66491	0	0.0394206	CNAG_02482		Translation machinery-associated protein 22	formation of translation preinitiation complex [GO:0001731]; translation reinitiation [GO:0002188]	cytoplasm [GO:0005737]; ribonucleoprotein complex [GO:1990904]; ribosome [GO:0005840]	mRNA binding [GO:0003729]; translation initiation factor activity [GO:0003743]
J9VQT7	WT:uggt	TRUE	0.1	0.0952761	14.7208	22.054	7.33319	0	161.254	CNAG_03405		Endoglucanase
J9VKZ2	WT:uggt	TRUE	0.1	0.0913641	23.3016	15.038	-8.26356	0	0.00325403	CNAG_07334		Ferric-chelate reductase	copper ion import [GO:0015677]; intracellular iron ion homeostasis [GO:0006879]; iron ion transport [GO:0006826]	plasma membrane [GO:0005886]	ferric-chelate reductase activity [GO:0000293]
J9VFH5	WT:uggt	TRUE	0.7	0.365376	24.5185	23.8531	-0.665414	0	0.630508	CNAG_03599		L-fuconate dehydratase (EC 4.2.1.68)	amino acid catabolic process [GO:0009063]; carbohydrate catabolic process [GO:0016052]		L-fuconate dehydratase activity [GO:0050023]; magnesium ion binding [GO:0000287]
J9VG15	WT:uggt	TRUE	0.7	0.129827	25.375	16.5896	-8.78541	0	0.00226636	CNAG_00149		NADH dehydrogenase (Ubiquinone) 1 alpha subcomplex 4		mitochondrial respiratory chain complex IV [GO:0005751]
J9VS16	WT:uggt	TRUE	0.1	0.259415	18.9261	23.3534	4.42733	0	21.5159	CNAG_07782		Oxidoreductase			NAD binding [GO:0051287]; oxidoreductase activity [GO:0016491]
J9VP56	WT:uggt	TRUE	0.7	0.855892	22.9924	22.938	-0.0544085	0	0.962989	CNAG_07689		Pre-mRNA-splicing factor CWC22	mRNA splicing, via spliceosome [GO:0000398]	catalytic step 2 spliceosome [GO:0071013]	RNA binding [GO:0003723]
J9VL58	WT:uggt	TRUE	0.7	0.359978	22.2922	18.4613	-3.83093	0	0.0702708	CNAG_01172		Right handed beta helix domain-containing protein		membrane [GO:0016020]
J9VEL1	WT:uggt	TRUE	0.1	0.119367	24.753	23.522	-1.23097	0	0.426031	CNAG_00648		Esterase/lipase	acylglycerol metabolic process [GO:0006639]	membrane [GO:0016020]	acylglycerol lipase activity [GO:0047372]
J9VR37	WT:uggt	TRUE	0.1	0.0511806	29.7528	28.5632	-1.18956	0	0.438437	CNAG_06923		Phosphoketolase	carbohydrate metabolic process [GO:0005975]		aldehyde-lyase activity [GO:0016832]
J9VNF9	WT:uggt	TRUE	0.7	0.639796	23.3845	23.6559	0.271443	0	1.20701	CNAG_01197		Ran GTPase-activating protein 1	nucleocytoplasmic transport [GO:0006913]	cytosol [GO:0005829]; nucleus [GO:0005634]; perinuclear region of cytoplasm [GO:0048471]	GTPase activator activity [GO:0005096]; small GTPase binding [GO:0031267]
J9VXQ1	WT:uggt	TRUE	0.7	0.75567	25.019	25.1092	0.0902495	0	1.06455	CNAG_05613		Dopey N-terminal domain-containing protein	Golgi to endosome transport [GO:0006895]	cytosol [GO:0005829]; endosome [GO:0005768]; trans-Golgi network [GO:0005802]
J9VQU3	WT:uggt	TRUE	0.1	0.0125962	11.9638	11.2574	-0.706352	0	0.612868	CNAG_01184		Uncharacterized protein			LPPG:FO 2-phospho-L-lactate transferase activity [GO:0043743]
J9VKU9	WT:uggt	TRUE	0.4	0.821967	18.186	19.4194	1.2333	0	2.35105	CNAG_07546		Peptide chain release factor 1		cytoplasm [GO:0005737]	translation release factor activity [GO:0003747]
J9VW00	WT:uggt	TRUE	0.7	0.413777	15.4309	11.7587	-3.67216	0	0.0784456	CNAG_06414		Cytochrome c oxidase-assembly factor COX23, mitochondrial	mitochondrial respiratory chain complex assembly [GO:0033108]	mitochondrial intermembrane space [GO:0005758]
J9VVL8	WT:uggt	TRUE	0.1	0.00123821	23.3577	22.7956	-0.562019	0	0.677354	CNAG_04785		Stress-response A/B barrel domain-containing protein
J9VEG0	WT:uggt	TRUE	0.2	0.319531	15.9778	11.4823	-4.49547	0	0.0443331	CNAG_00592		Dolichol-phosphate mannosyltransferase			glycosyltransferase activity [GO:0016757]
J9VZE9	WT:uggt	TRUE	0.1	0.0650819	24.6456	25.1478	0.502241	0	1.41641	CNAG_01833		Translation initiation factor 4E		eukaryotic translation initiation factor 4F complex [GO:0016281]	RNA 7-methylguanosine cap binding [GO:0000340]; translation initiation factor activity [GO:0003743]
J9W108	WT:uggt	TRUE	0.1	0.0895527	24.8926	23.7019	-1.19068	0	0.438097	CNAG_06421		Acetolactate synthase, small subunit	isoleucine biosynthetic process [GO:0009097]; valine biosynthetic process [GO:0009099]	acetolactate synthase complex [GO:0005948]; mitochondrial nucleoid [GO:0042645]	acetolactate synthase regulator activity [GO:1990610]
J9VMT7	WT:uggt	TRUE	0.4	0.251235	23.8604	23.3696	-0.490811	0	0.711625	CNAG_02265		Exportin-T (Exportin(tRNA)) (tRNA exportin)	tRNA re-export from nucleus [GO:0071528]	cytoplasm [GO:0005737]; nuclear matrix [GO:0016363]; nuclear pore [GO:0005643]	small GTPase binding [GO:0031267]; tRNA binding [GO:0000049]
J9VUK1	WT:uggt	TRUE	0.7	0.143545	15.335	22.6788	7.3438	0	162.444	CNAG_04360	TRM5	tRNA (guanine(37)-N1)-methyltransferase (EC 2.1.1.228) (M1G-methyltransferase) (tRNA [GM37] methyltransferase) (tRNA methyltransferase 5)	mitochondrial tRNA methylation [GO:0070901]; tRNA N1-guanine methylation [GO:0002939]	mitochondrial matrix [GO:0005759]; nucleus [GO:0005634]	tRNA (guanine(37)-N1)-methyltransferase activity [GO:0052906]
J9VIB2	WT:uggt	TRUE	0.7	0.616277	25.9067	25.4679	-0.43882	0	0.737738	CNAG_03641		Eukaryotic translation initiation factor 3 subunit D (eIF3d)	cap-dependent translational initiation [GO:0002191]; formation of cytoplasmic translation initiation complex [GO:0001732]	eukaryotic 43S preinitiation complex [GO:0016282]; eukaryotic 48S preinitiation complex [GO:0033290]; eukaryotic translation initiation factor 3 complex [GO:0005852]	mRNA cap binding [GO:0098808]; translation initiation factor activity [GO:0003743]
J9VVD8	WT:uggt	TRUE	0.7	0.993738	24.5969	24.6011	0.00423788	0	1.00294	CNAG_06175		26S proteasome regulatory subunit RPN2	proteasome-mediated ubiquitin-dependent protein catabolic process [GO:0043161]; regulation of protein catabolic process [GO:0042176]	nucleus [GO:0005634]; proteasome regulatory particle, base subcomplex [GO:0008540]; proteasome storage granule [GO:0034515]	enzyme regulator activity [GO:0030234]
T2BPH0	WT:uggt	TRUE	0.2	0.365893	14.8846	21.4328	6.54824	0	93.5875	CNAG_04437		Nicotinamide riboside kinase, variant		cytoplasm [GO:0005737]	kinase activity [GO:0016301]
J9VH03	WT:uggt	TRUE	0.7	0.420953	28.2741	27.6214	-0.652714	0	0.636083	CNAG_03000		Small subunit ribosomal protein S19e	ribosomal small subunit assembly [GO:0000028]; translation [GO:0006412]	cytosolic small ribosomal subunit [GO:0022627]	RNA binding [GO:0003723]; structural constituent of ribosome [GO:0003735]
J9VJI8	WT:uggt	TRUE	0.1	0.213313	25.8439	23.4854	-2.35849	0	0.194995	CNAG_06849		Saccharopine dehydrogenase [NAD(+), L-lysine-forming] (SDH) (EC 1.5.1.7) (Lysine--2-oxoglutarate reductase)	lysine biosynthetic process via aminoadipic acid [GO:0019878]	cytoplasm [GO:0005737]	saccharopine dehydrogenase (NAD+, L-lysine-forming) activity [GO:0004754]
J9VQ90	WT:uggt	TRUE	0.4	0.132899	11.7227	19.2371	7.51436	0	182.83	CNAG_01359		DNA-directed RNA polymerase II subunit RPB7	positive regulation of nuclear-transcribed mRNA poly(A) tail shortening [GO:0060213]; positive regulation of translational initiation [GO:0045948]; transcription initiation at RNA polymerase II promoter [GO:0006367]	P-body [GO:0000932]; RNA polymerase II, core complex [GO:0005665]	single-stranded DNA binding [GO:0003697]; single-stranded RNA binding [GO:0003727]; translation initiation factor binding [GO:0031369]
J9W0Z4	WT:uggt	TRUE	0.2	0.227447	21.801	21.2461	-0.554898	0	0.680705	CNAG_01530		Suppressor protein SPT23	regulation of transcription by RNA polymerase II [GO:0006357]	membrane [GO:0016020]; nucleus [GO:0005634]	double-stranded DNA binding [GO:0003690]; transcription coregulator activity [GO:0003712]
J9W3W9	WT:uggt	TRUE	0.1	0.169766	23.9394	23.3844	-0.554943	0	0.680684	CNAG_05455		Translation initiation factor eIF-1A		cytoplasm [GO:0005737]	RNA binding [GO:0003723]; translation initiation factor activity [GO:0003743]
J9VI31	WT:uggt	TRUE	0.1	0.247678	23.944	22.1986	-1.7454	0	0.298251	CNAG_06754		RNA polymerase-associated protein CTR9	regulation of DNA-templated transcription [GO:0006355]; transcription elongation by RNA polymerase II [GO:0006368]	Cdc73/Paf1 complex [GO:0016593]	RNA polymerase II complex binding [GO:0000993]
J9W3X5	WT:uggt	TRUE	0.7	0.175773	18.373	11.7736	-6.59939	0	0.010313	CNAG_05460		2-dehydropantoate 2-reductase (EC 1.1.1.169) (Ketopantoate reductase)	pantothenate biosynthetic process [GO:0015940]	cytoplasm [GO:0005737]	2-dehydropantoate 2-reductase activity [GO:0008677]
J9VMK7	WT:uggt	TRUE	0.1	0.0964894	22.2147	15.3374	-6.87729	0	0.00850609	CNAG_02853		Amidophosphoribosyltransferase (ATase) (EC 2.4.2.14) (Glutamine phosphoribosylpyrophosphate amidotransferase)	'de novo' IMP biosynthetic process [GO:0006189]; purine nucleobase biosynthetic process [GO:0009113]	cytoplasm [GO:0005737]	amidophosphoribosyltransferase activity [GO:0004044]; metal ion binding [GO:0046872]
J9VQM9	WT:uggt	TRUE	0.1	0.123918	21.9884	15.9938	-5.99463	0	0.0156833	CNAG_03347		ATP-dependent Clp protease ATP-binding subunit ClpB	cellular response to heat [GO:0034605]; protein refolding [GO:0042026]; protein unfolding [GO:0043335]; proteolysis [GO:0006508]	mitochondrial matrix [GO:0005759]	ATP binding [GO:0005524]; ATP hydrolysis activity [GO:0016887]; peptidase activity [GO:0008233]
J9VK86	WT:uggt	TRUE	1	0.379394	11.1812	14.299	3.1178	0	8.68061	CNAG_06791		Uncharacterized protein		membrane [GO:0016020]
J9VNN1	WT:uggt	TRUE	0.4	0.118052	28.7109	27.1787	-1.53217	0	0.345757	CNAG_01120		Acetyltransferase component of pyruvate dehydrogenase complex (EC 2.3.1.12)	acetyl-CoA biosynthetic process from pyruvate [GO:0006086]	mitochondrion [GO:0005739]; pyruvate dehydrogenase complex [GO:0045254]	dihydrolipoyllysine-residue acetyltransferase activity [GO:0004742]
J9VL35	WT:uggt	TRUE	0.2	0.160017	24.6771	24.9371	0.25993	0	1.19742	CNAG_03818		Osomolarity two-component system, response regulator SSK1	osmosensory signaling via phosphorelay pathway [GO:0007234]		phosphorelay response regulator activity [GO:0000156]; protein kinase activator activity [GO:0030295]
J9VLB4	WT:uggt	TRUE	1	0.785384	25.8143	25.7475	-0.0668379	0	0.954728	CNAG_04976		Zuotin	'de novo' cotranslational protein folding [GO:0051083]; regulation of translational fidelity [GO:0006450]	cytosol [GO:0005829]	Hsp70 protein binding [GO:0030544]; ribosome binding [GO:0043022]
J9VRS8	WT:uggt	TRUE	0.7	0.42906	22.9526	19.3875	-3.56513	0	0.0844865	CNAG_04462		F-box protein 9	SCF-dependent proteasomal ubiquitin-dependent protein catabolic process [GO:0031146]	cytoplasm [GO:0005737]; SCF ubiquitin ligase complex [GO:0019005]
J9VXD1	WT:uggt	TRUE	0.4	0.830454	18.1263	19.2483	1.12198	0	2.17646	CNAG_03144		peptide-methionine (S)-S-oxide reductase (EC 1.8.4.11) (Peptide-methionine (S)-S-oxide reductase)			peptide-methionine (S)-S-oxide reductase activity [GO:0008113]
J9VNK9	WT:uggt	TRUE	0.4	0.279605	27.237	26.514	-0.72301	0	0.605832	CNAG_01144		Replication protein A subunit	DNA replication [GO:0006260]; double-strand break repair via homologous recombination [GO:0000724]; meiotic cell cycle [GO:0051321]; nucleotide-excision repair [GO:0006289]; telomere maintenance via telomerase [GO:0007004]	DNA replication factor A complex [GO:0005662]	damaged DNA binding [GO:0003684]; metal ion binding [GO:0046872]; single-stranded telomeric DNA binding [GO:0043047]
J9VJJ4	WT:uggt	TRUE	0.7	0.73457	11.4442	11.702	0.257788	0	1.19564	CNAG_04096		Racemase	carbohydrate catabolic process [GO:0016052]		L-rhamnonate dehydratase activity [GO:0050032]; magnesium ion binding [GO:0000287]
J9VU34	WT:uggt	TRUE	0.1	0.0851853	26.1986	25.9767	-0.221829	0	0.857478	CNAG_01740		Septin	cytoskeleton-dependent cytokinesis [GO:0061640]; regulation of exocytosis [GO:0017157]	cell division site [GO:0032153]; cytosol [GO:0005829]; microtubule cytoskeleton [GO:0015630]; septin complex [GO:0031105]; septin ring [GO:0005940]	GTP binding [GO:0005525]; GTPase activity [GO:0003924]; molecular adaptor activity [GO:0060090]
J9VP90	WT:uggt	TRUE	1	0.538759	24.4363	24.7688	0.33256	0	1.25925	CNAG_05124	SEY1	Protein SEY1	endoplasmic reticulum membrane fusion [GO:0016320]; endoplasmic reticulum organization [GO:0007029]; endoplasmic reticulum tubular network organization [GO:0071786]	endoplasmic reticulum membrane [GO:0005789]	GTP binding [GO:0005525]; GTPase activity [GO:0003924]
J9VVP1	WT:uggt	TRUE	0.4	0.136562	22.3795	20.9422	-1.43731	0	0.369255	CNAG_03459		T-complex protein 1 subunit delta		chaperonin-containing T-complex [GO:0005832]	ATP binding [GO:0005524]; ATP hydrolysis activity [GO:0016887]; ATP-dependent protein folding chaperone [GO:0140662]; unfolded protein binding [GO:0051082]
J9VIU5	WT:uggt	TRUE	0.7	0.470625	23.2169	24.0845	0.86756	0	1.82457	CNAG_02565		Homoaconitase, mitochondrial (EC 4.2.1.36) (Homoaconitate hydratase)	lysine biosynthetic process via aminoadipic acid [GO:0019878]	mitochondrion [GO:0005739]	4 iron, 4 sulfur cluster binding [GO:0051539]; homoaconitate hydratase activity [GO:0004409]; metal ion binding [GO:0046872]
J9VKZ9	WT:uggt	TRUE	0.1	0.143098	21.9505	17.2412	-4.70932	0	0.0382255	CNAG_00231		Uncharacterized protein	methylation [GO:0032259]	cytoplasm [GO:0005737]	methyltransferase activity [GO:0008168]
J9VP30	WT:uggt	TRUE	0.1	0.0740584	25.2839	23.5153	-1.76859	0	0.293495	CNAG_07667		non-specific serine/threonine protein kinase (EC 2.7.11.1)	DNA damage response [GO:0006974]; intracellular signal transduction [GO:0035556]	cytoplasm [GO:0005737]; nucleus [GO:0005634]	ATP binding [GO:0005524]; protein serine/threonine kinase activity [GO:0004674]
J9VWM2	WT:uggt	TRUE	0.7	0.152461	17.5939	11.4838	-6.1101	0	0.0144769	CNAG_01607		Thioredoxin	cell redox homeostasis [GO:0045454]	cytosol [GO:0005829]	protein-disulfide reductase activity [GO:0015035]
J9VVB2	WT:uggt	TRUE	0.1	0.0657942	27.8709	25.2266	-2.64431	0	0.15995	CNAG_02007	ADK1	Adenylate kinase (EC 2.7.4.3) (ATP-AMP transphosphorylase) (ATP:AMP phosphotransferase) (Adenylate kinase cytosolic and mitochondrial) (Adenylate monophosphate kinase)	ADP biosynthetic process [GO:0006172]; AMP metabolic process [GO:0046033]; ATP metabolic process [GO:0046034]	cytosol [GO:0005829]; mitochondrial intermembrane space [GO:0005758]	adenylate kinase activity [GO:0004017]; ATP binding [GO:0005524]
J9VMJ7	WT:uggt	TRUE	0.7	0.144248	23.8377	15.5377	-8.30002	0	0.00317281	CNAG_02372		Enoyl reductase	very long-chain fatty acid biosynthetic process [GO:0042761]	endoplasmic reticulum membrane [GO:0005789]	oxidoreductase activity, acting on the CH-CH group of donors [GO:0016627]
J9VMP1	WT:uggt	TRUE	0.2	0.350316	22.5661	18.743	-3.82314	0	0.0706513	CNAG_01426		Vacuolar protein sorting 26 (Vacuolar protein sorting 26, variant 2)	intracellular protein transport [GO:0006886]; retrograde transport, endosome to Golgi [GO:0042147]	cytosol [GO:0005829]; endosome [GO:0005768]; retromer complex [GO:0030904]
J9VQL0	WT:uggt	TRUE	0.4	0.362849	18.6178	21.9564	3.3386	0	10.1162	CNAG_02113		AP complex subunit sigma	intracellular protein transport [GO:0006886]	AP-1 adaptor complex [GO:0030121]	clathrin adaptor activity [GO:0035615]
J9VXW5	WT:uggt	TRUE	0.7	0.461901	11.4049	11.0035	-0.401349	0	0.75715	CNAG_06021		Rab GTPase activator		early endosome [GO:0005769]	GTPase activator activity [GO:0005096]
J9W3S2	WT:uggt	TRUE	0.1	0.261229	22.923	18.6898	-4.23315	0	0.0531736	CNAG_05432		Uncharacterized protein
J9VTC5	WT:uggt	TRUE	1	0.937129	24.0312	24.0616	0.0304438	0	1.02133	CNAG_04720		GTPase activating protein			calcium ion binding [GO:0005509]
O93927	WT:uggt	TRUE	1	0.755485	27.9554	27.6064	-0.348978	0	0.78514	CNAG_06508	FKS1	1,3-beta-glucan synthase component FKS1 (EC 2.4.1.34)	(1->3)-beta-D-glucan biosynthetic process [GO:0006075]; cell wall biogenesis [GO:0042546]; cell wall organization [GO:0071555]; fungal-type cell wall polysaccharide biosynthetic process [GO:0051278]	1,3-beta-D-glucan synthase complex [GO:0000148]; perinuclear endoplasmic reticulum [GO:0097038]; plasma membrane [GO:0005886]	1,3-beta-D-glucan synthase activity [GO:0003843]; alpha-1,3-glucan synthase activity [GO:0047657]
J9VXI0	WT:uggt	TRUE	0.7	0.145733	25.1677	16.4957	-8.67199	0	0.00245172	CNAG_05527		Senataxin	nuclear-transcribed mRNA catabolic process, nonsense-mediated decay [GO:0000184]	cytoplasm [GO:0005737]	RNA helicase activity [GO:0003724]
J9VMF6	WT:uggt	TRUE	0.4	0.972268	20.2901	20.0548	-0.235302	0	0.849507	CNAG_02431		TatD DNase		cytosol [GO:0005829]	3'-5'-DNA exonuclease activity [GO:0008296]; metal ion binding [GO:0046872]
J9VXL7	WT:uggt	TRUE	0.1	0.0425888	28.2678	27.5941	-0.673695	0	0.626899	CNAG_03198		40S ribosomal protein S8	maturation of SSU-rRNA from tricistronic rRNA transcript (SSU-rRNA, 5.8S rRNA, LSU-rRNA) [GO:0000462]; translation [GO:0006412]	cytosolic small ribosomal subunit [GO:0022627]	structural constituent of ribosome [GO:0003735]
J9VER3	WT:uggt	TRUE	1	0.649604	15.2126	13.5302	-1.68243	0	0.311556	CNAG_00707		Protein SYM1	cellular response to reactive oxygen species [GO:0034614]	mitochondrial inner membrane [GO:0005743]
J9VSZ5	WT:uggt	TRUE	1	0.466668	11.3787	14.747	3.36834	0	10.3269	CNAG_02080		GATA-type domain-containing protein
T2BPX6	WT:uggt	TRUE	0.1	0.0820317	10.8314	17.7996	6.9682	0	125.21	CNAG_05991		Glycosyl hydrolase family 88, variant	polysaccharide catabolic process [GO:0000272]		chondroitin hydrolase activity [GO:0052757]
J9VKS6	WT:uggt	TRUE	0.7	0.957978	25.8614	25.8961	0.0346867	0	1.02433	CNAG_00148		Protein transport protein sec16	autophagy [GO:0006914]; COPII vesicle coating [GO:0048208]; Golgi organization [GO:0007030]; protein localization to endoplasmic reticulum exit site [GO:0070973]; protein transport [GO:0015031]	endoplasmic reticulum exit site [GO:0070971]; endoplasmic reticulum membrane [GO:0005789]; ER to Golgi transport vesicle membrane [GO:0012507]
J9VW44	WT:uggt	TRUE	0.4	0.378631	24.3237	23.7094	-0.614295	0	0.653249	CNAG_06465		Transcription regulator	phospholipid translocation [GO:0045332]	endoplasmic reticulum [GO:0005783]; Golgi apparatus [GO:0005794]; plasma membrane [GO:0005886]
Q58Z64	WT:uggt	TRUE	0.1	0.229167	25.4955	19.7819	-5.7136	0	0.0190561	CNAG_01537	VAD1	ATP-dependent RNA helicase VAD1 (EC 3.6.4.13) (Virulence-associated DEAD box protein 1)	mRNA processing [GO:0006397]; mRNA transport [GO:0051028]; negative regulation of translation [GO:0017148]; P-body assembly [GO:0033962]; stress granule assembly [GO:0034063]	cytoplasmic stress granule [GO:0010494]; P-body [GO:0000932]	ATP binding [GO:0005524]; ATP hydrolysis activity [GO:0016887]; mRNA binding [GO:0003729]; RNA helicase activity [GO:0003724]
J9VLC0	WT:uggt	TRUE	0.2	0.139602	22.9169	22.8504	-0.0664655	0	0.954975	CNAG_01103		Splicing factor 3A subunit 2	spliceosomal complex assembly [GO:0000245]	catalytic step 2 spliceosome [GO:0071013]; U2 snRNP [GO:0005686]; U2-type prespliceosome [GO:0071004]	nucleic acid binding [GO:0003676]; zinc ion binding [GO:0008270]
J9VI65	WT:uggt	TRUE	0.1	0.0097569	23.4224	22.4741	-0.948334	0	0.51823	CNAG_06713		cysteine--tRNA ligase (EC 6.1.1.16) (Cysteinyl-tRNA synthetase)	cysteinyl-tRNA aminoacylation [GO:0006423]	cytoplasm [GO:0005737]	ATP binding [GO:0005524]; cysteine-tRNA ligase activity [GO:0004817]; metal ion binding [GO:0046872]
J9VPC4	WT:uggt	TRUE	0.1	0.0583018	25.7075	24.1638	-1.54363	0	0.343021	CNAG_03113		Trehalose synthase	glucose metabolic process [GO:0006006]		glycosyltransferase activity [GO:0016757]
J9VI26	WT:uggt	TRUE	0.1	0.0241164	22.8223	23.1757	0.353357	0	1.27753	CNAG_02845		Metallo-beta-lactamase domain-containing protein	N-acylethanolamine metabolic process [GO:0070291]; N-acylphosphatidylethanolamine metabolic process [GO:0070292]	cytoplasm [GO:0005737]; membrane [GO:0016020]; membrane-bounded organelle [GO:0043227]	N-acylphosphatidylethanolamine-specific phospholipase D activity [GO:0070290]
J9VID2	WT:uggt	TRUE	0.1	0.292417	22.2997	18.1192	-4.18053	0	0.0551488	CNAG_03661		Sedlin	endoplasmic reticulum to Golgi vesicle-mediated transport [GO:0006888]	cytoplasm [GO:0005737]; nucleus [GO:0005634]; TRAPP complex [GO:0030008]
J9VWK2	WT:uggt	TRUE	0.7	0.442534	26.8085	24.2384	-2.57014	0	0.168387	CNAG_04237		ABM domain-containing protein
J9VRY2	WT:uggt	TRUE	1	0.704047	11.63	11.3875	-0.242503	0	0.845278	CNAG_04513		DNA-directed RNA polymerase subunit beta (EC 2.7.7.6)		RNA polymerase III complex [GO:0005666]	DNA binding [GO:0003677]; metal ion binding [GO:0046872]; ribonucleoside binding [GO:0032549]; RNA polymerase III activity [GO:0001056]
J9VW89	WT:uggt	TRUE	0.1	0.095447	23.4026	15.367	-8.03559	0	0.00381106	CNAG_06665		Rab-GAP TBC domain-containing protein	endoplasmic reticulum to Golgi vesicle-mediated transport [GO:0006888]	endoplasmic reticulum membrane [GO:0005789]	GTPase activator activity [GO:0005096]
T2BPP0	WT:uggt	TRUE	0.7	0.338866	23.6513	24.3759	0.724604	0	1.65245	CNAG_04786		Histone deacetylation-related protein
J9VXM1	WT:uggt	TRUE	0.1	0.00242728	23.7143	24.3828	0.66847	0	1.58939	CNAG_03203		DNA polymerase epsilon subunit C (DNA polymerase II subunit C)	chromatin remodeling [GO:0006338]; DNA-templated DNA replication [GO:0006261]; regulation of DNA-templated transcription [GO:0006355]	CHRAC [GO:0008623]	protein heterodimerization activity [GO:0046982]; transcription cis-regulatory region binding [GO:0000976]
J9VMX2	WT:uggt	TRUE	0.7	0.447263	25.6693	21.4541	-4.21521	0	0.053839	CNAG_02773		Exosome complex exonuclease RRP6	exonucleolytic trimming to generate mature 3'-end of 5.8S rRNA from tricistronic rRNA transcript (SSU-rRNA, 5.8S rRNA, LSU-rRNA) [GO:0000467]; histone mRNA catabolic process [GO:0071044]; nuclear polyadenylation-dependent antisense transcript catabolic process [GO:0071040]; nuclear polyadenylation-dependent CUT catabolic process [GO:0071039]; nuclear polyadenylation-dependent rRNA catabolic proce…	nuclear exosome (RNase complex) [GO:0000176]; nucleolus [GO:0005730]	3'-5'-RNA exonuclease activity [GO:0000175]; nucleotide binding [GO:0000166]; single-stranded RNA binding [GO:0003727]
J9VZY2	WT:uggt	TRUE	0.7	0.233812	11.7354	15.514	3.77863	0	13.724	CNAG_05584	MDE1	Methylthioribulose-1-phosphate dehydratase (MTRu-1-P dehydratase) (EC 4.2.1.109)	L-methionine salvage from methylthioadenosine [GO:0019509]; L-methionine salvage from S-adenosylmethionine [GO:0019284]	cytoplasm [GO:0005737]	methylthioribulose 1-phosphate dehydratase activity [GO:0046570]; zinc ion binding [GO:0008270]
J9VU25	WT:uggt	TRUE	0.7	0.446214	11.6032	11.7918	0.188684	0	1.13972	CNAG_01730		STE/STE7/MEK1 protein kinase			ATP binding [GO:0005524]; protein kinase activity [GO:0004672]
J9VU90	WT:uggt	TRUE	0.7	0.624857	24.4149	23.8455	-0.569447	0	0.673875	CNAG_01811		DUF1014-domain-containing protein	transcription by RNA polymerase II [GO:0006366]	nucleus [GO:0005634]	transcription coactivator activity [GO:0003713]
J9VNZ4	WT:uggt	TRUE	0.4	0.365916	24.1952	19.828	-4.3672	0	0.0484554	CNAG_06673		Maintenance of telomere capping protein 1
J9VPR1	WT:uggt	TRUE	0.7	0.900331	20.8376	20.769	-0.0685278	0	0.953611	CNAG_05934		Translin		cytoplasm [GO:0005737]; nucleus [GO:0005634]	RNA binding [GO:0003723]; RNA endonuclease activity [GO:0004521]; sequence-specific DNA binding [GO:0043565]
J9VQ34	WT:uggt	TRUE	0.7	0.152998	27.477	23.0771	-4.39987	0	0.0473705	CNAG_03142		Uncharacterized protein
J9VPE2	WT:uggt	TRUE	0.1	0.0596954	23.8574	24.2351	0.377729	0	1.29929	CNAG_05804		Nuclear pore complex protein Nup188	mRNA transport [GO:0051028]; protein import into nucleus [GO:0006606]; RNA export from nucleus [GO:0006405]	nuclear pore inner ring [GO:0044611]	structural constituent of nuclear pore [GO:0017056]
J9VWI0	WT:uggt	TRUE	0.1	0.0617955	22.2451	14.9331	-7.31205	0	0.00629294	CNAG_04211		Nuclear RNA export factor 1/2	poly(A)+ mRNA export from nucleus [GO:0016973]	nucleus [GO:0005634]	RNA binding [GO:0003723]
J9VPS2	WT:uggt	TRUE	1	0.625948	17.9358	19.8958	1.96004	0	3.89073	CNAG_02982		U3 small nucleolar RNA-associated protein 13	endonucleolytic cleavage in 5'-ETS of tricistronic rRNA transcript (SSU-rRNA, 5.8S rRNA, LSU-rRNA) [GO:0000480]; endonucleolytic cleavage to generate mature 5'-end of SSU-rRNA from (SSU-rRNA, 5.8S rRNA, LSU-rRNA) [GO:0000472]	90S preribosome [GO:0030686]; nucleolus [GO:0005730]; small-subunit processome [GO:0032040]	U3 snoRNA binding [GO:0034511]
J9W0I3	WT:uggt	TRUE	0.1	0.0419304	11.7618	10.8394	-0.922467	0	0.527606	CNAG_06226		NADH dehydrogenase (Ubiquinone) 1 alpha subcomplex 5	respiratory electron transport chain [GO:0022904]	mitochondrial respiratory chain complex I [GO:0005747]
J9VVS7	WT:uggt	TRUE	0.4	0.885462	14.7543	14.0491	-0.705277	0	0.613325	CNAG_06526		HNH nuclease domain-containing protein
J9VQ78	WT:uggt	TRUE	0.1	0.227582	24.9742	19.292	-5.68215	0	0.0194762	CNAG_02262		ATP-binding cassette transporter		fungal-type vacuole membrane [GO:0000329]	ABC-type transporter activity [GO:0140359]; ATP binding [GO:0005524]; ATP hydrolysis activity [GO:0016887]
J9W0T8	WT:uggt	TRUE	0.4	0.363597	22.4199	18.6929	-3.72702	0	0.0755189	CNAG_06336	VEP16	glucan endo-1,3-beta-D-glucosidase (EC 3.2.1.39) (Endo-1,3-beta-glucanase btgC) (Laminarinase btgC)	carbohydrate metabolic process [GO:0005975]; cell wall organization [GO:0071555]	cell surface [GO:0009986]; extracellular region [GO:0005576]; fungal-type cell wall [GO:0009277]; membrane [GO:0016020]	glucan endo-1,3-beta-D-glucosidase activity [GO:0042973]
J9VNR7	WT:uggt	TRUE	0.1	0.0186156	25.6001	25.9529	0.352768	0	1.27701	CNAG_05798	SRP9	Signal recognition particle subunit SRP9	SRP-dependent cotranslational protein targeting to membrane [GO:0006614]	signal recognition particle, endoplasmic reticulum targeting [GO:0005786]	7S RNA binding [GO:0008312]
J9VRA8	WT:uggt	TRUE	0.7	0.733437	25.2029	25.4551	0.252173	0	1.191	CNAG_06626		RNA helicase (EC 3.6.4.13)		spliceosomal complex [GO:0005681]	ATP binding [GO:0005524]; hydrolase activity [GO:0016787]; RNA binding [GO:0003723]; RNA helicase activity [GO:0003724]
J9VZ56	WT:uggt	TRUE	0.4	0.389121	23.5868	23.8355	0.248729	0	1.18816	CNAG_06511		Uncharacterized protein			oxidoreductase activity [GO:0016491]
J9VI44	WT:uggt	TRUE	0.1	0.0756204	21.6075	14.5884	-7.01911	0	0.00770968	CNAG_00142		NUC153 domain-containing protein	rRNA processing [GO:0006364]	nucleolus [GO:0005730]	RNA binding [GO:0003723]
J9W2J5	WT:uggt	TRUE	0.7	0.494018	15.3148	19.7939	4.47914	0	22.3026	CNAG_06130		Uncharacterized protein
J9VSH2	WT:uggt	TRUE	0.1	0.20826	24.8922	19.2746	-5.61764	0	0.0203667	CNAG_02267		Cell cycle arrest protein BUB3	meiotic cell cycle [GO:0051321]; mitotic spindle assembly checkpoint signaling [GO:0007094]	bub1-bub3 complex [GO:1990298]; kinetochore [GO:0000776]; mitotic checkpoint complex [GO:0033597]; nucleoplasm [GO:0005654]; phragmoplast [GO:0009524]	ubiquitin binding [GO:0043130]
J9VVU0	WT:uggt	TRUE	0.7	0.395992	14.1645	11.4539	-2.71069	0	0.152757	CNAG_06339		Zn(2)-C6 fungal-type domain-containing protein	DNA-templated transcription [GO:0006351]	nucleus [GO:0005634]	DNA-binding transcription factor activity, RNA polymerase II-specific [GO:0000981]; transcription cis-regulatory region binding [GO:0000976]; zinc ion binding [GO:0008270]
J9VWD6	WT:uggt	TRUE	0.1	0.0917775	26.6369	24.793	-1.84389	0	0.27857	CNAG_05366		Eukaryotic translation initiation factor 2A (eIF-2A)		cytosolic small ribosomal subunit [GO:0022627]	mRNA binding [GO:0003729]; ribosome binding [GO:0043022]; translation initiation factor activity [GO:0003743]; tRNA binding [GO:0000049]
J9W491	WT:uggt	TRUE	0.1	0.0453283	22.9129	22.2299	-0.682971	0	0.622881	CNAG_05629		Endoribonuclease YSH1	mRNA 3'-end processing by stem-loop binding and cleavage [GO:0006398]	mRNA cleavage and polyadenylation specificity factor complex [GO:0005847]	5'-3' RNA exonuclease activity [GO:0004534]; RNA binding [GO:0003723]; RNA endonuclease activity [GO:0004521]
T2BNK6	WT:uggt	TRUE	0.7	0.365189	25.7735	25.2302	-0.543262	0	0.686218	CNAG_01988		Bacteriophytochrome histidine kinase, variant	detection of visible light [GO:0009584]; regulation of DNA-templated transcription [GO:0006355]		ATP binding [GO:0005524]; phosphorelay sensor kinase activity [GO:0000155]; photoreceptor activity [GO:0009881]
J9VSU2	WT:uggt	TRUE	0.7	0.468868	23.8468	20.3922	-3.45461	0	0.0912134	CNAG_04884		Large ribosomal subunit protein eL42 (60S ribosomal protein L41) (60S ribosomal protein L44)	translation [GO:0006412]	cytosolic large ribosomal subunit [GO:0022625]	structural constituent of ribosome [GO:0003735]
J9VM57	WT:uggt	TRUE	1	0.50922	11.4763	13.738	2.2617	0	4.79557	CNAG_02269		Autophagy-like protein 18 Atg18	nucleophagy [GO:0044804]; protein localization to phagophore assembly site [GO:0034497]	cytosol [GO:0005829]; extrinsic component of membrane [GO:0019898]; fungal-type vacuole membrane [GO:0000329]; phagophore assembly site membrane [GO:0034045]	phosphatidylinositol-3,5-bisphosphate binding [GO:0080025]; phosphatidylinositol-3-phosphate binding [GO:0032266]
J9VEK3	WT:uggt	TRUE	0.1	0.346534	23.9858	19.812	-4.17378	0	0.0554073	CNAG_00639		Oxo-4-hydroxy-4-carboxy-5-ureidoimidazoline decarboxylase domain-containing protein	purine nucleobase metabolic process [GO:0006144]
J9VM96	WT:uggt	TRUE	0.7	0.136591	25.4812	23.9362	-1.54499	0	0.342699	CNAG_02223		Signal sequence binding protein	Golgi to endosome transport [GO:0006895]; Golgi to vacuole transport [GO:0006896]; protein targeting to vacuole [GO:0006623]	cytosol [GO:0005829]; Golgi apparatus [GO:0005794]; membrane [GO:0016020]
J9VKG0	WT:uggt	TRUE	0.1	0.0970437	28.6464	26.7035	-1.94297	0	0.260081	CNAG_01404		Hsp71-like protein		cytosol [GO:0005829]; nucleus [GO:0005634]	ATP binding [GO:0005524]; ATP-dependent protein folding chaperone [GO:0140662]
J9VNK5	WT:uggt	TRUE	1	0.393063	22.1179	18.4149	-3.70296	0	0.0767889	CNAG_06553		Association with the SNF1 complex (ASC) domain-containing protein	signal transduction [GO:0007165]	cytoplasm [GO:0005737]; nucleotide-activated protein kinase complex [GO:0031588]; nucleus [GO:0005634]	protein kinase binding [GO:0019901]
J9VDR8	WT:uggt	TRUE	0.7	0.367579	24.5964	20.4186	-4.1778	0	0.0552532	CNAG_00279		Uncharacterized protein		endoplasmic reticulum membrane [GO:0005789]
J9VNT1	WT:uggt	TRUE	0.7	0.636152	22.1562	19.7359	-2.42024	0	0.186825	CNAG_03854		Lysine decarboxylase	cytokinin biosynthetic process [GO:0009691]	cytosol [GO:0005829]	hydrolase activity, hydrolyzing N-glycosyl compounds [GO:0016799]
J9VUE0	WT:uggt	TRUE	0.7	0.607533	26.7854	26.0906	-0.694876	0	0.617762	CNAG_05909		quinol--cytochrome-c reductase (EC 7.1.1.8)	mitochondrial electron transport, ubiquinol to cytochrome c [GO:0006122]	mitochondrial respiratory chain complex III [GO:0005750]	electron transfer activity [GO:0009055]; heme binding [GO:0020037]; metal ion binding [GO:0046872]
J9VFK6	WT:uggt	TRUE	0.4	0.136945	22.1353	22.6533	0.517997	0	1.43197	CNAG_03634		DNA-directed RNA polymerase I subunit RPA49	RNA polymerase I preinitiation complex assembly [GO:0001188]; transcription elongation by RNA polymerase I [GO:0006362]	RNA polymerase I complex [GO:0005736]	DNA binding [GO:0003677]
J9VWU8	WT:uggt	TRUE	0.1	0.00238327	27.4552	26.6477	-0.807495	0	0.571373	CNAG_05480		Phosphotransferase (EC 2.7.1.-)	glucose metabolic process [GO:0006006]; glycolytic process [GO:0006096]; intracellular glucose homeostasis [GO:0001678]; mannose metabolic process [GO:0006013]	cytosol [GO:0005829]; mitochondrion [GO:0005739]	ATP binding [GO:0005524]; fructokinase activity [GO:0008865]; glucokinase activity [GO:0004340]; glucose binding [GO:0005536]; mannokinase activity [GO:0019158]
J9VGQ7	WT:uggt	TRUE	0.7	0.655825	27.1736	27.3621	0.188508	0	1.13958	CNAG_00393	GLC3	1,4-alpha-glucan-branching enzyme (EC 2.4.1.18) (Glycogen-branching enzyme)	glycogen biosynthetic process [GO:0005978]; starch metabolic process [GO:0005982]	cytosol [GO:0005829]	1,4-alpha-glucan branching enzyme activity [GO:0003844]; 1,4-alpha-glucan branching enzyme activity (using a glucosylated glycogenin as primer for glycogen synthesis) [GO:0102752]; cation binding [GO:0043169]; hydrolase activity, hydrolyzing O-glycosyl compounds [GO:0004553]
J9W1I6	WT:uggt	TRUE	1	0.941758	11.569	11.5386	-0.0303278	0	0.979198	CNAG_05441		Lipid particle protein	cellular lipid metabolic process [GO:0044255]	lipid droplet [GO:0005811]; membrane [GO:0016020]	lysophospholipase activity [GO:0004622]
J9VLI0	WT:uggt	TRUE	1	0.969095	14.9636	15.1847	0.221158	0	1.16567	CNAG_03924		Nit protein 1	nucleobase-containing compound metabolic process [GO:0006139]		bis(5'-adenosyl)-triphosphatase activity [GO:0047710]; hydrolase activity, acting on carbon-nitrogen (but not peptide) bonds, in linear amides [GO:0016811]
J9VQU0	WT:uggt	TRUE	0.7	0.755754	26.2168	26.0964	-0.120427	0	0.919915	CNAG_07559		Glucose-6-phosphate 1-epimerase (EC 5.1.3.15)	carbohydrate metabolic process [GO:0005975]	cytoplasm [GO:0005737]	carbohydrate binding [GO:0030246]; glucose-6-phosphate 1-epimerase activity [GO:0047938]
J9VPH4	WT:uggt	TRUE	0.7	0.369022	23.7158	19.3626	-4.35329	0	0.0489249	CNAG_02506		3,4-dihydroxy-2-butanone 4-phosphate synthase (DHBP synthase) (EC 4.1.99.12)	riboflavin biosynthetic process [GO:0009231]	cytosol [GO:0005829]	3,4-dihydroxy-2-butanone-4-phosphate synthase activity [GO:0008686]; metal ion binding [GO:0046872]
J9VF22	WT:uggt	TRUE	0.7	0.137658	20.5926	13.8829	-6.70967	0	0.00955405	CNAG_00781	LSM3	U6 snRNA-associated Sm-like protein LSm3	mRNA splicing, via spliceosome [GO:0000398]; P-body assembly [GO:0033962]	catalytic step 2 spliceosome [GO:0071013]; Lsm1-7-Pat1 complex [GO:1990726]; P-body [GO:0000932]; precatalytic spliceosome [GO:0071011]; U4/U6 x U5 tri-snRNP complex [GO:0046540]; U6 snRNP [GO:0005688]	RNA binding [GO:0003723]
J9VRX2	WT:uggt	TRUE	0.7	0.414102	14.4961	11.594	-2.90213	0	0.133774	CNAG_05165		t-SNARE coiled-coil homology domain-containing protein	protein transport [GO:0015031]; retrograde vesicle-mediated transport, Golgi to endoplasmic reticulum [GO:0006890]	endoplasmic reticulum [GO:0005783]; SNARE complex [GO:0031201]	SNAP receptor activity [GO:0005484]
J9VIY4	WT:uggt	TRUE	0.7	0.17332	26.1806	24.3035	-1.87708	0	0.272234	CNAG_05117		Oxysterol-binding protein		cytosol [GO:0005829]; intracellular membrane-bounded organelle [GO:0043231]; membrane [GO:0016020]	sterol binding [GO:0032934]
J9VXB7	WT:uggt	TRUE	0.1	0.0308919	24.0464	24.3228	0.276413	0	1.21118	CNAG_06998		Protein transporter SEC61 subunit alpha	post-translational protein targeting to membrane, translocation [GO:0031204]; SRP-dependent cotranslational protein targeting to membrane, translocation [GO:0006616]	Sec61 translocon complex [GO:0005784]	protein transmembrane transporter activity [GO:0008320]; ribosome binding [GO:0043022]; signal sequence binding [GO:0005048]
J9W2G0	WT:uggt	TRUE	0.1	0.000296005	26.8715	27.3698	0.498294	0	1.41254	CNAG_06088		Aspartate aminotransferase (EC 2.6.1.1)	aspartate catabolic process [GO:0006533]; L-phenylalanine biosynthetic process from chorismate via phenylpyruvate [GO:0033585]	cytosol [GO:0005829]; mitochondrion [GO:0005739]	identical protein binding [GO:0042802]; L-aspartate:2-oxoglutarate aminotransferase activity [GO:0004069]; L-tyrosine:2-oxoglutarate aminotransferase activity [GO:0004838]; pyridoxal phosphate binding [GO:0030170]
J9VTA2	WT:uggt	TRUE	0.1	0.253965	18.4629	23.6194	5.15657	0	35.6682	CNAG_03422		Calcineurin temperature suppressor Cts1
J9VWW6	WT:uggt	TRUE	0.1	0.0176876	11.937	11.3218	-0.615121	0	0.652875	CNAG_05895		Protein CFT1 (Cleavage factor two protein 1) (Protein cft1)		mRNA cleavage and polyadenylation specificity factor complex [GO:0005847]	nucleic acid binding [GO:0003676]
J9W1I8	WT:uggt	TRUE	0.4	0.474313	18.3507	14.9645	-3.38612	0	0.0956482	CNAG_01728		SH3 domain-containing protein	actin cortical patch assembly [GO:0000147]	nucleus [GO:0005634]
J9VUK6	WT:uggt	TRUE	0.7	0.163675	24.7937	16.2595	-8.53423	0	0.00269738	CNAG_01957		Proteasome subunit beta	proteasome-mediated ubiquitin-dependent protein catabolic process [GO:0043161]	cytoplasm [GO:0005737]; nucleus [GO:0005634]; proteasome core complex, beta-subunit complex [GO:0019774]
J9VJZ5	WT:uggt	TRUE	0.1	0.295688	18.3531	22.5899	4.23681	0	18.8542	CNAG_05297		Ion transport domain-containing protein		membrane [GO:0016020]
J9VPC9	WT:uggt	TRUE	0.2	0.126307	20.6066	23.2237	2.61714	0	6.13533	CNAG_02547		Nuclear pore complex protein Nup205	nuclear pore organization [GO:0006999]	nuclear pore inner ring [GO:0044611]	structural constituent of nuclear pore [GO:0017056]
J9VRB4	WT:uggt	TRUE	1	0.967769	24.9764	24.9596	-0.0168222	0	0.988407	CNAG_07801		Aldo-keto reductase	small molecule metabolic process [GO:0044281]		oxidoreductase activity [GO:0016491]
J9VSB2	WT:uggt	TRUE	0.1	0.0991347	22.5266	14.8071	-7.71943	0	0.00474481	CNAG_04433		CMGC/DYRK/DYRK2 protein kinase		cytoplasm [GO:0005737]; cytoskeleton [GO:0005856]; nucleus [GO:0005634]	ATP binding [GO:0005524]; protein serine/threonine kinase activity [GO:0004674]
J9VE87	WT:uggt	TRUE	0.7	0.827517	14.1745	15.3253	1.15088	0	2.22049	CNAG_00496		Uncharacterized protein
J9VLA1	WT:uggt	TRUE	0.1	0.105442	24.5597	25.0353	0.475608	0	1.3905	CNAG_00311		3-hydroxyisobutyryl-CoA hydrolase (EC 3.1.2.4)	valine catabolic process [GO:0006574]	cytosol [GO:0005829]; mitochondrion [GO:0005739]	3-hydroxyisobutyryl-CoA hydrolase activity [GO:0003860]; hydrolase activity [GO:0016787]
J9VPN7	WT:uggt	TRUE	0.2	0.327032	23.5267	19.2036	-4.32313	0	0.0499585	CNAG_03185		Low temperature-responsive protein		cytosol [GO:0005829]	FMN binding [GO:0010181]; oxidoreductase activity [GO:0016491]
J9VKJ4	WT:uggt	TRUE	0.1	0.102371	17.4999	23.3212	5.82137	0	56.5467	CNAG_03631		Integral membrane protein		endomembrane system [GO:0012505]; membrane [GO:0016020]
J9VLR5	WT:uggt	TRUE	0.1	0.238076	27.2005	20.9218	-6.27868	0	0.0128804	CNAG_00509		Eukaryotic translation initiation factor 3 subunit M (eIF3m)	formation of cytoplasmic translation initiation complex [GO:0001732]	eukaryotic 43S preinitiation complex [GO:0016282]; eukaryotic 48S preinitiation complex [GO:0033290]; eukaryotic translation initiation factor 3 complex, eIF3m [GO:0071541]	translation initiation factor activity [GO:0003743]
J9VRW2	WT:uggt	TRUE	0.1	0.104099	26.9651	16.3184	-10.6467	0	0.000623767	CNAG_04258		Arf/Sar family protein	intracellular protein transport [GO:0006886]; protein localization to Golgi membrane [GO:1903292]; vesicle-mediated transport [GO:0016192]	trans-Golgi network [GO:0005802]	GTP binding [GO:0005525]; GTPase activity [GO:0003924]
J9VDI1	WT:uggt	TRUE	0.4	0.970993	18.9981	19.2003	0.202262	0	1.1505	CNAG_07326		NADH dehydrogenase [ubiquinone] 1 beta subcomplex subunit 11, mitochondrial (Complex I-ESSS) (NADH-ubiquinone oxidoreductase ESSS subunit)		membrane [GO:0016020]
J9VX12	WT:uggt	TRUE	0.1	0.203584	26.6734	20.08	-6.59339	0	0.010356	CNAG_01713		Uncharacterized protein		membrane [GO:0016020]
J9VUY5	WT:uggt	TRUE	0.2	0.110843	21.5294	14.74	-6.78941	0	0.00904033	CNAG_03158		Alpha-1,3-mannosyltransferase CMT1		membrane [GO:0016020]	glycosyltransferase activity [GO:0016757]
J9VQQ8	WT:uggt	TRUE	1	0.637253	11.1521	11.4773	0.325205	0	1.25284	CNAG_02656		Translation machinery-associated protein 20	formation of translation preinitiation complex [GO:0001731]	cytoplasm [GO:0005737]	RNA binding [GO:0003723]
J9VJ78	WT:uggt	TRUE	0.1	0.0932049	16.8482	22.2919	5.44372	0	43.5235	CNAG_03956		Replication factor C subunit 3/5	DNA clamp unloading [GO:0090618]; DNA repair [GO:0006281]; DNA strand elongation involved in DNA replication [GO:0006271]	Ctf18 RFC-like complex [GO:0031390]; DNA replication factor C complex [GO:0005663]; Elg1 RFC-like complex [GO:0031391]; Rad17 RFC-like complex [GO:0031389]	ATP hydrolysis activity [GO:0016887]; DNA binding [GO:0003677]; DNA clamp loader activity [GO:0003689]
J9VSP6	WT:uggt	TRUE	0.1	0.105229	24.1768	23.3406	-0.836144	0	0.560139	CNAG_04760		Cytoplasmic protein
J9VLE2	WT:uggt	TRUE	0.1	0.0743344	22.8371	21.8111	-1.02598	0	0.491076	CNAG_00365		Lysophospholipid acyltransferase	glycerophospholipid biosynthetic process [GO:0046474]; lipid modification [GO:0030258]; triglyceride biosynthetic process [GO:0019432]	endoplasmic reticulum [GO:0005783]; membrane [GO:0016020]	1-acylglycerol-3-phosphate O-acyltransferase activity [GO:0003841]; 1-acylglycerophosphocholine O-acyltransferase activity [GO:0047184]
J9VT77	WT:uggt	TRUE	0.4	0.374467	23.6625	23.429	-0.233545	0	0.850543	CNAG_04774		Nuclear protein	DNA-templated transcription [GO:0006351]	nucleus [GO:0005634]	DNA binding [GO:0003677]; DNA-binding transcription factor activity, RNA polymerase II-specific [GO:0000981]; zinc ion binding [GO:0008270]
J9VL78	WT:uggt	TRUE	0.7	0.994212	25.9412	25.9475	0.00630876	0	1.00438	CNAG_00286		C3H1-type domain-containing protein	regulation of mRNA stability [GO:0043488]	cytoplasm [GO:0005737]; nucleus [GO:0005634]	metal ion binding [GO:0046872]; poly(A) binding [GO:0008143]
J9VTC0	WT:uggt	TRUE	0.4	0.142907	22.5818	24.0655	1.4837	0	2.79664	CNAG_01496		Serine/threonine-protein phosphatase (EC 3.1.3.16)			metal ion binding [GO:0046872]; myosin phosphatase activity [GO:0017018]
J9VG16	WT:uggt	TRUE	0.7	0.145701	17.5104	11.8426	-5.66779	0	0.019671	CNAG_03816		Proteasome subunit beta	proteasome-mediated ubiquitin-dependent protein catabolic process [GO:0043161]	cytoplasm [GO:0005737]; nucleus [GO:0005634]; proteasome core complex, beta-subunit complex [GO:0019774]	threonine-type endopeptidase activity [GO:0004298]
J9VXV3	WT:uggt	TRUE	0.2	0.0629725	23.8317	23.1936	-0.638113	0	0.642553	CNAG_03314		YTH domain family 2	mRNA destabilization [GO:0061157]	cytoplasm [GO:0005737]	mRNA binding [GO:0003729]; N6-methyladenosine-containing RNA reader activity [GO:1990247]
J9W230	WT:uggt	TRUE	0.1	0.0682214	28.3231	25.0432	-3.27995	0	0.102952	CNAG_01981		Sulfide:quinone oxidoreductase	sulfide oxidation, using sulfide:quinone oxidoreductase [GO:0070221]	mitochondrion [GO:0005739]	FAD binding [GO:0071949]; sulfide:quinone oxidoreductase activity [GO:0070224]
J9VLY4	WT:uggt	TRUE	0.1	0.0875109	23.6693	15.704	-7.96526	0	0.00400147	CNAG_05166		Helicase SWR1		Swr1 complex [GO:0000812]	ATP binding [GO:0005524]; ATP hydrolysis activity [GO:0016887]; ATP-dependent chromatin remodeler activity [GO:0140658]; helicase activity [GO:0004386]; histone binding [GO:0042393]
J9VD63	WT:uggt	TRUE	0.1	0.334234	22.129	18.4168	-3.71227	0	0.0762949	CNAG_00085		Anti-silencing function protein 1	DNA replication-dependent chromatin assembly [GO:0006335]	nucleus [GO:0005634]	histone binding [GO:0042393]
J9VKV2	WT:uggt	TRUE	0.4	0.366606	15.0885	11.9771	-3.11145	0	0.115707	CNAG_01045		Nucleoporin NDC1	mRNA transport [GO:0051028]; nuclear pore organization [GO:0006999]; protein transport [GO:0015031]; spindle pole body localization [GO:0070631]	nuclear membrane [GO:0031965]; nuclear pore transmembrane ring [GO:0070762]; spindle pole body [GO:0005816]	spindle pole body-nuclear membrane anchor activity [GO:0106166]
J9VUB1	WT:uggt	TRUE	0.1	0.218415	29.7964	25.738	-4.05841	0	0.06002	CNAG_01648 CNAG_07807		Histone H4	nucleosome assembly [GO:0006334]	nucleosome [GO:0000786]; nucleus [GO:0005634]	DNA binding [GO:0003677]; protein heterodimerization activity [GO:0046982]; structural constituent of chromatin [GO:0030527]
J9VTG0	WT:uggt	TRUE	0.1	0.100851	27.3035	25.7676	-1.53587	0	0.344871	CNAG_06594		Oxysterol binding protein		cytosol [GO:0005829]; intracellular membrane-bounded organelle [GO:0043231]; membrane [GO:0016020]	oxysterol binding [GO:0008142]
J9VJ67	WT:uggt	TRUE	0.4	0.127656	21.0981	22.3901	1.29201	0	2.44869	CNAG_00513		Ribosome biogenesis protein NOP53	rRNA processing [GO:0006364]	nucleolus [GO:0005730]; nucleoplasm [GO:0005654]	5S rRNA binding [GO:0008097]
J9VVK6	WT:uggt	TRUE	0.2	0.0610983	24.6732	25.17	0.496811	0	1.41109	CNAG_04800		phenylalanine--tRNA ligase (EC 6.1.1.20) (Phenylalanyl-tRNA synthetase alpha subunit)	phenylalanyl-tRNA aminoacylation [GO:0006432]	cytosol [GO:0005829]; phenylalanine-tRNA ligase complex [GO:0009328]	ATP binding [GO:0005524]; metal ion binding [GO:0046872]; phenylalanine-tRNA ligase activity [GO:0004826]; tRNA binding [GO:0000049]
J9VRT2	WT:uggt	TRUE	0.2	0.057922	25.1361	26.1489	1.01282	0	2.01786	CNAG_04221		6-phosphofructo-2-kinase/fructose-2, 6-bisphosphatase	fructose 2,6-bisphosphate metabolic process [GO:0006003]; fructose metabolic process [GO:0006000]	cytosol [GO:0005829]	6-phosphofructo-2-kinase activity [GO:0003873]; ATP binding [GO:0005524]; fructose-2,6-bisphosphate 2-phosphatase activity [GO:0004331]
J9VY31	WT:uggt	TRUE	0.2	0.26646	21.172	17.6167	-3.55529	0	0.0850652	CNAG_04694		Periodic tryptophan protein 1	rRNA processing [GO:0006364]	nucleus [GO:0005634]
J9VSF6	WT:uggt	TRUE	0.1	0.0666594	28.627	27.2282	-1.39884	0	0.379233	CNAG_04478		Uncharacterized protein
J9VWN7	WT:uggt	TRUE	0.4	0.12068	22.4043	15.5087	-6.89568	0	0.00839837	CNAG_01621		MARVEL domain-containing protein		membrane [GO:0016020]
J9VHG5	WT:uggt	TRUE	1	0.571062	11.5768	11.7433	0.166462	0	1.1223	CNAG_03075		DNA polymerase delta subunit 3	DNA strand elongation involved in DNA replication [GO:0006271]; DNA synthesis involved in UV-damage excision repair [GO:1904161]; nucleotide-excision repair, DNA gap filling [GO:0006297]	delta DNA polymerase complex [GO:0043625]	DNA-directed DNA polymerase activity [GO:0003887]
J9VX52	WT:uggt	TRUE	0.7	0.858819	26.4573	26.2471	-0.210195	0	0.86442	CNAG_04485		Long-chain acyl-CoA synthetase	long-chain fatty-acyl-CoA metabolic process [GO:0035336]; neuron differentiation [GO:0030182]	endoplasmic reticulum [GO:0005783]; lipid droplet [GO:0005811]; plasma membrane [GO:0005886]	palmitoyl-CoA ligase activity [GO:0090433]
J9VEQ0	WT:uggt	TRUE	0.7	0.129686	11.3401	18.6958	7.35571	0	163.791	CNAG_00390		Myotubularin	phosphatidylinositol dephosphorylation [GO:0046856]	cytoplasm [GO:0005737]; membrane [GO:0016020]	phosphatidylinositol-3,5-bisphosphate phosphatase activity [GO:0106018]; phosphatidylinositol-3-phosphate phosphatase activity [GO:0004438]
J9VYB1	WT:uggt	TRUE	1	0.555282	11.381	11.0837	-0.297298	0	0.813775	CNAG_06164		Uncharacterized protein
J9VMK3	WT:uggt	TRUE	0.4	0.30025	22.776	18.7708	-4.0052	0	0.0622752	CNAG_00760		Methylenetetrahydrofolate reductase	methionine biosynthetic process [GO:0009086]; tetrahydrofolate interconversion [GO:0035999]	cytosol [GO:0005829]	FAD binding [GO:0071949]; methylenetetrahydrofolate reductase (NAD(P)H) activity [GO:0004489]
J9VL18	WT:uggt	TRUE	1	0.598671	11.9259	11.7347	-0.191179	0	0.87589	CNAG_01221		Alkyl transferase (EC 2.5.1.-)	dolichol biosynthetic process [GO:0019408]; protein glycosylation [GO:0006486]	dehydrodolichyl diphosphate synthase complex [GO:1904423]; endoplasmic reticulum [GO:0005783]; lipid droplet [GO:0005811]	dehydrodolichyl diphosphate synthase activity [GO:0045547]; polyprenyltransferase activity [GO:0002094]
J9VX73	WT:uggt	TRUE	0.4	0.330965	23.015	22.0594	-0.955688	0	0.515596	CNAG_05626		Thioredoxin domain-containing protein	intracellular copper ion homeostasis [GO:0006878]; mitochondrial cytochrome c oxidase assembly [GO:0033617]	mitochondrial inner membrane [GO:0005743]	copper chaperone activity [GO:0016531]; copper ion binding [GO:0005507]
J9VJ94	WT:uggt	TRUE	0.4	0.206913	11.1325	11.7003	0.567871	0	1.48233	CNAG_03976		BZIP domain-containing protein		Cbf1-Met4-Met28 complex [GO:0089713]; nucleus [GO:0005634]	DNA-binding transcription activator activity, RNA polymerase II-specific [GO:0001228]; RNA polymerase II transcription regulatory region sequence-specific DNA binding [GO:0000977]
J9VRM3	WT:uggt	TRUE	0.7	0.221298	25.0509	23.8464	-1.20449	0	0.433923	CNAG_05100		ENTH domain-containing protein c	endocytosis [GO:0006897]; Golgi to endosome transport [GO:0006895]	clathrin vesicle coat [GO:0030125]; cytosol [GO:0005829]; endosome [GO:0005768]; plasma membrane [GO:0005886]	clathrin binding [GO:0030276]; phospholipid binding [GO:0005543]
J9VPJ2	WT:uggt	TRUE	0.1	0.110352	24.5433	15.5695	-8.97386	0	0.00198883	CNAG_05859		Uncharacterized protein	protein secretion [GO:0009306]
J9VI07	WT:uggt	TRUE	0.7	0.578677	22.395	22.9534	0.558422	0	1.47266	CNAG_07556		Uncharacterized protein
J9VLR6	WT:uggt	TRUE	1	0.44791	23.6689	20.0355	-3.63334	0	0.0805854	CNAG_02437		rRNA biogenesis protein RRP5	rRNA processing [GO:0006364]	nucleolus [GO:0005730]; small-subunit processome [GO:0032040]	RNA binding [GO:0003723]
J9VXU0	WT:uggt	TRUE	0.1	0.0415292	27.7417	26.9475	-0.794194	0	0.576665	CNAG_03299		Coatomer subunit beta (Beta-coat protein)	endoplasmic reticulum to Golgi vesicle-mediated transport [GO:0006888]; intra-Golgi vesicle-mediated transport [GO:0006891]; intracellular protein transport [GO:0006886]	COPI vesicle coat [GO:0030126]; Golgi membrane [GO:0000139]	structural molecule activity [GO:0005198]
J9VUQ3	WT:uggt	TRUE	0.1	0.0844861	26.9657	26.2572	-0.708508	0	0.611953	CNAG_01770		MRS7 family protein		mitochondrial inner membrane [GO:0005743]	ribosome binding [GO:0043022]
J9VG93	WT:uggt	TRUE	0.4	0.465237	25.1921	24.7215	-0.470643	0	0.721643	CNAG_03648	UGG1	UDP-glucose:glycoprotein glucosyltransferase	protein N-linked glycosylation via asparagine [GO:0018279]	endoplasmic reticulum lumen [GO:0005788]	UDP-glucose:glycoprotein glucosyltransferase activity [GO:0003980]; unfolded protein binding [GO:0051082]
J9VIP3	WT:uggt	TRUE	0.7	0.12574	24.1331	15.8744	-8.2587	0	0.00326501	CNAG_03779		Large ribosomal subunit protein uL4m	translation [GO:0006412]	ribonucleoprotein complex [GO:1990904]; ribosome [GO:0005840]	structural constituent of ribosome [GO:0003735]
J9W462	WT:uggt	TRUE	0.1	0.0742389	26.3674	27.4764	1.10893	0	2.15685	CNAG_05592		Potassium/sodium efflux P-type ATPase, fungal-type	intracellular calcium ion homeostasis [GO:0006874]	endoplasmic reticulum [GO:0005783]; membrane [GO:0016020]	ATP binding [GO:0005524]; ATP hydrolysis activity [GO:0016887]; P-type calcium transporter activity [GO:0005388]
J9VKS0	WT:uggt	TRUE	0.7	0.540106	27.5178	26.9948	-0.522971	0	0.695937	CNAG_00143		Phosphoribosylaminoimidazole-succinocarboxamide synthase (EC 6.3.2.6) (SAICAR synthetase)	'de novo' IMP biosynthetic process [GO:0006189]; tRNA aminoacylation for protein translation [GO:0006418]	cytoplasm [GO:0005737]	aminoacyl-tRNA ligase activity [GO:0004812]; ATP binding [GO:0005524]; phosphoribosylaminoimidazolesuccinocarboxamide synthase activity [GO:0004639]
J9VUW8	WT:uggt	TRUE	1	0.61555	10.94	11.2586	0.318518	0	1.24705	CNAG_06033		PfkB family carbohydrate kinase superfamily			kinase activity [GO:0016301]
J9VUT2	WT:uggt	TRUE	0.7	0.685201	11.1167	11.3296	0.212968	0	1.15907	CNAG_02381		DH domain-containing protein		cytoplasm [GO:0005737]	guanyl-nucleotide exchange factor activity [GO:0005085]
J9VVA5	WT:uggt	TRUE	0.7	0.985211	24.0697	24.0805	0.0108069	0	1.00752	CNAG_02175		5'-3' exoribonuclease 1 (EC 3.1.13.-)	nuclear-transcribed mRNA catabolic process, nonsense-mediated decay [GO:0000184]	cytoplasm [GO:0005737]	5'-3' RNA exonuclease activity [GO:0004534]; RNA binding [GO:0003723]
J9VHQ6	WT:uggt	TRUE	0.7	0.23165	20.7773	23.3414	2.56414	0	5.91402	CNAG_00011		Cyclase	tryptophan catabolic process to kynurenine [GO:0019441]		arylformamidase activity [GO:0004061]
J9VIC2	WT:uggt	TRUE	0.2	0.115522	14.328	20.7587	6.43073	0	86.2666	CNAG_07030		Uncharacterized protein
J9VG96	WT:uggt	TRUE	1	0.790459	25.9749	26.0864	0.111551	0	1.08039	CNAG_00237		3-isopropylmalate dehydratase (EC 4.2.1.33) (Alpha-IPM isomerase) (Isopropylmalate isomerase)	L-leucine biosynthetic process [GO:0009098]	3-isopropylmalate dehydratase complex [GO:0009316]	3-isopropylmalate dehydratase activity [GO:0003861]; 4 iron, 4 sulfur cluster binding [GO:0051539]; metal ion binding [GO:0046872]
J9VTW2	WT:uggt	TRUE	0.1	0.0404628	24.2001	24.4053	0.205167	0	1.15282	CNAG_05721		Multifunctional beta-oxidation protein	fatty acid beta-oxidation [GO:0006635]	peroxisome [GO:0005777]	oxidoreductase activity [GO:0016491]
J9VJL9	WT:uggt	TRUE	1	0.867401	10.9339	10.7946	-0.139278	0	0.907973	CNAG_00680		Kinetochore protein Nuf2	attachment of mitotic spindle microtubules to kinetochore [GO:0051315]; kinetochore organization [GO:0051383]; meiotic chromosome segregation [GO:0045132]; mitotic spindle organization [GO:0007052]	Ndc80 complex [GO:0031262]; nucleus [GO:0005634]	protein-containing complex binding [GO:0044877]
J9VMS7	WT:uggt	TRUE	0.1	0.0988522	11.6757	18.903	7.22731	0	149.843	CNAG_07635		Kinetochore protein NDC80	attachment of mitotic spindle microtubules to kinetochore [GO:0051315]; cell division [GO:0051301]	Ndc80 complex [GO:0031262]; nucleus [GO:0005634]
J9VTF3	WT:uggt	TRUE	0.7	0.609583	22.8468	20.354	-2.49283	0	0.177657	CNAG_01155		glycerol kinase (EC 2.7.1.30) (ATP:glycerol 3-phosphotransferase)	glycerol catabolic process [GO:0019563]; glycerol-3-phosphate biosynthetic process [GO:0046167]; triglyceride metabolic process [GO:0006641]	cytosol [GO:0005829]; mitochondrion [GO:0005739]	glycerol kinase activity [GO:0004370]
J9VI88	WT:uggt	TRUE	0.7	0.660529	24.1997	24.0484	-0.151332	0	0.900419	CNAG_00188		ER membrane protein complex subunit 4	protein folding in endoplasmic reticulum [GO:0034975]	EMC complex [GO:0072546]
J9VJ18	WT:uggt	TRUE	1	0.754574	19.9929	19.3517	-0.641204	0	0.641178	CNAG_00462		Electron transfer flavoprotein-ubiquinone oxidoreductase (ETF-QO) (EC 1.5.5.1)		mitochondrion [GO:0005739]	4 iron, 4 sulfur cluster binding [GO:0051539]; electron-transferring-flavoprotein dehydrogenase activity [GO:0004174]; metal ion binding [GO:0046872]
J9VQJ6	WT:uggt	TRUE	0.1	0.0363002	24.7877	24.0678	-0.719937	0	0.607124	CNAG_02128	HCR1	Eukaryotic translation initiation factor 3 subunit J (eIF3j) (Eukaryotic translation initiation factor 3 30 kDa subunit homolog) (eIF-3 30 kDa subunit homolog)	formation of cytoplasmic translation initiation complex [GO:0001732]	eukaryotic 43S preinitiation complex [GO:0016282]; eukaryotic 48S preinitiation complex [GO:0033290]; eukaryotic translation initiation factor 3 complex [GO:0005852]	translation initiation factor activity [GO:0003743]
J9VQ31	WT:uggt	TRUE	0.4	0.340297	11.0197	15.0452	4.02543	0	16.2845	CNAG_03352		BolA protein	intracellular iron ion homeostasis [GO:0006879]; protein maturation by iron-sulfur cluster transfer [GO:0097428]	cytosol [GO:0005829]; nucleus [GO:0005634]	2 iron, 2 sulfur cluster binding [GO:0051537]
J9VRE0	WT:uggt	TRUE	0.1	0.305293	15.7418	11.4089	-4.33293	0	0.0496202	CNAG_04286		DNA-directed RNA polymerase I, II, and III subunit RPABC3		RNA polymerase I complex [GO:0005736]; RNA polymerase II, core complex [GO:0005665]; RNA polymerase III complex [GO:0005666]	RNA polymerase I activity [GO:0001054]; RNA polymerase II activity [GO:0001055]; RNA polymerase III activity [GO:0001056]
J9VFU5	WT:uggt	TRUE	0.1	0.000712089	25.0409	25.7827	0.741812	0	1.67227	CNAG_07476		Uncharacterized protein			protein heterodimerization activity [GO:0046982]
J9VR93	WT:uggt	TRUE	0.1	0.0655468	14.4391	21.5734	7.13429	0	140.487	CNAG_04975		Uncharacterized protein
J9VMY6	WT:uggt	TRUE	0.7	0.488326	23.4904	22.9819	-0.508491	0	0.702957	CNAG_06750		Endoplasmic reticulum junction formation protein lunapark	endoplasmic reticulum tubular network maintenance [GO:0071788]; positive regulation of endoplasmic reticulum tubular network organization [GO:1903373]	endoplasmic reticulum tubular network membrane [GO:0098826]	metal ion binding [GO:0046872]
J9VTY6	WT:uggt	TRUE	0.1	0.278329	23.1946	18.3339	-4.8607	0	0.0344178	CNAG_00934		Allantoinase	purine nucleobase catabolic process [GO:0006145]	cytoplasm [GO:0005737]	allantoinase activity [GO:0004038]
J9VGM9	WT:uggt	TRUE	0.1	0.110404	25.4285	25.5866	0.158083	0	1.1158	CNAG_03796		non-specific serine/threonine protein kinase (EC 2.7.11.1)	regulation of vacuole fusion, non-autophagic [GO:0032889]; vacuolar protein processing [GO:0006624]	Golgi apparatus [GO:0005794]; vacuole [GO:0005773]	ATP binding [GO:0005524]; protein serine/threonine kinase activity [GO:0004674]
Q85SZ5	WT:uggt	TRUE	0.1	0.0793148	17.7944	10.689	-7.10534	0	0.00726238	CNAG_09010		NADH-ubiquinone oxidoreductase chain 2	ATP synthesis coupled electron transport [GO:0042773]	mitochondrion [GO:0005739]; respirasome [GO:0070469]	NADH dehydrogenase (ubiquinone) activity [GO:0008137]
J9VHN7	WT:uggt	TRUE	0.7	0.127579	21.629	14.6862	-6.94285	0	0.00812817	CNAG_02979		Fe2OG dioxygenase domain-containing protein	DNA damage response [GO:0006974]; fatty acid metabolic process [GO:0006631]	mitochondrial matrix [GO:0005759]
J9VQ22	WT:uggt	TRUE	0.1	0.0872468	27.999	16.7701	-11.2289	0	0.000416646	CNAG_02891		Endoplasmic reticulum protein		mitochondrion [GO:0005739]	thiosulfate sulfurtransferase activity [GO:0004792]
J9VNN5	WT:uggt	TRUE	0.1	0.0132203	22.6031	23.4337	0.830529	0	1.77834	CNAG_06577		Uncharacterized protein
J9VRC5	WT:uggt	TRUE	0.4	0.227242	25.3932	19.4903	-5.90286	0	0.0167133	CNAG_06646		Protein YOP1	endoplasmic reticulum tubular network organization [GO:0071786]	membrane [GO:0016020]
J9VSE6	WT:uggt	TRUE	0.7	0.86807	23.0979	22.8511	-0.246839	0	0.842741	CNAG_02303		RNA helicase (EC 3.6.4.13)	mRNA splicing, via spliceosome [GO:0000398]	spliceosomal complex [GO:0005681]	3'-5' RNA helicase activity [GO:0034458]; ATP binding [GO:0005524]; hydrolase activity [GO:0016787]; RNA binding [GO:0003723]
J9VIE9	WT:uggt	TRUE	0.1	0.0875045	21.4952	14.2038	-7.29147	0	0.00638337	CNAG_03681		Peptidylprolyl isomerase domain and WD-repeat protein 1	protein folding [GO:0006457]	catalytic step 2 spliceosome [GO:0071013]	peptidyl-prolyl cis-trans isomerase activity [GO:0003755]
J9VNG1	WT:uggt	TRUE	0.4	0.127273	20.5554	11.215	-9.3404	0	0.00154262	CNAG_06888		Cytoplasmic protein	cellular response to amino acid starvation [GO:0034198]; positive regulation of TORC1 signaling [GO:1904263]	cytoplasm [GO:0005737]
J9VW14	WT:uggt	TRUE	0.1	0.0600515	23.1824	14.9529	-8.22946	0	0.00333184	CNAG_06195		Chromatin target of PRMT1 protein C-terminal domain-containing protein		nucleus [GO:0005634]	mRNA binding [GO:0003729]; RNA 7-methylguanosine cap binding [GO:0000340]
J9VYF9	WT:uggt	TRUE	0.2	0.322832	14.3489	11.1885	-3.16045	0	0.111844	CNAG_03540		Glutamyl-tRNA(Gln) amidotransferase subunit B, mitochondrial (Glu-AdT subunit B) (EC 6.3.5.-)	glutaminyl-tRNAGln biosynthesis via transamidation [GO:0070681]; mitochondrial translation [GO:0032543]	glutamyl-tRNA(Gln) amidotransferase complex [GO:0030956]; mitochondrion [GO:0005739]	ATP binding [GO:0005524]; glutaminyl-tRNA synthase (glutamine-hydrolyzing) activity [GO:0050567]; transferase activity [GO:0016740]
J9W0B9	WT:uggt	TRUE	0.1	0.101862	26.3544	25.3789	-0.975548	0	0.508547	CNAG_04749		SsuA/THI5-like domain-containing protein	alkanesulfonate transmembrane transport [GO:0042918]
J9VIZ3	WT:uggt	TRUE	0.7	0.921483	18.4752	19.0288	0.553578	0	1.46772	CNAG_06935		Isochorismatase hydrolase			hydrolase activity [GO:0016787]
J9VN86	WT:uggt	TRUE	0.1	0.0512316	24.9364	23.3646	-1.57181	0	0.336387	CNAG_07558		CS domain-containing protein	chaperone-mediated protein complex assembly [GO:0051131]; protein folding [GO:0006457]	cytosol [GO:0005829]; nucleus [GO:0005634]	Hsp90 protein binding [GO:0051879]; protein-folding chaperone binding [GO:0051087]
J9VNB2	WT:uggt	TRUE	0.1	0.178907	20.3432	16.2369	-4.10634	0	0.0580589	CNAG_06657		DinB-like domain-containing protein
J9VLL1	WT:uggt	TRUE	0.1	0.0611269	25.2002	26.2893	1.08916	0	2.1275	CNAG_03959		Uncharacterized protein
J9VTW8	WT:uggt	TRUE	1	0.950149	18.7361	18.4055	-0.330601	0	0.795205	CNAG_04130		Zn(2)-C6 fungal-type domain-containing protein		nucleus [GO:0005634]	DNA-binding transcription factor activity, RNA polymerase II-specific [GO:0000981]; zinc ion binding [GO:0008270]
J9VTX3	WT:uggt	TRUE	0.7	0.508663	17.9407	14.4875	-3.45322	0	0.0913013	CNAG_01508		Conserved oligomeric Golgi complex subunit 1	intra-Golgi vesicle-mediated transport [GO:0006891]; protein transport [GO:0015031]	Golgi transport complex [GO:0017119]; membrane [GO:0016020]
J9W1L5	WT:uggt	TRUE	0.7	0.411895	18.8	22.1554	3.35538	0	10.2346	CNAG_01772		Fe2OG dioxygenase domain-containing protein	small molecule biosynthetic process [GO:0044283]		2-oxoglutarate-dependent dioxygenase activity [GO:0016706]; metal ion binding [GO:0046872]
J9VP27	WT:uggt	TRUE	0.1	0.228707	28.3074	26.1866	-2.12077	0	0.229925	CNAG_03920		Isocitrate dehydrogenase [NADP] (EC 1.1.1.42)	isocitrate metabolic process [GO:0006102]; NADP metabolic process [GO:0006739]; tricarboxylic acid cycle [GO:0006099]	cytosol [GO:0005829]; mitochondrion [GO:0005739]; peroxisome [GO:0005777]	isocitrate dehydrogenase (NADP+) activity [GO:0004450]; magnesium ion binding [GO:0000287]; NAD binding [GO:0051287]
J9VUP9	WT:uggt	TRUE	0.1	0.0722779	15.67	24.6673	8.99732	0	511.049	CNAG_01764		Cytoplasmic protein	glutathione metabolic process [GO:0006749]	cytosol [GO:0005829]	5-oxoprolinase (ATP-hydrolyzing) activity [GO:0017168]
J9VUN4	WT:uggt	TRUE	0.4	0.214787	24.765	23.41	-1.355	0	0.390936	CNAG_02434		Copper chaperone	copper ion transport [GO:0006825]	cytosol [GO:0005829]	copper chaperone activity [GO:0016531]; metal ion binding [GO:0046872]
J9VFW9	WT:uggt	TRUE	0.7	0.149349	18.5002	12.2487	-6.25149	0	0.0131254	CNAG_03761		mRNA 3'-end-processing protein RNA14	mRNA 3'-end processing [GO:0031124]	cytoplasm [GO:0005737]; nucleus [GO:0005634]	mRNA binding [GO:0003729]
T2BPW8	WT:uggt	TRUE	0.2	0.139373	23.8099	22.9809	-0.829003	0	0.562918	CNAG_01952		Aryl-alcohol dehydrogenase, variant		cytosol [GO:0005829]	oxidoreductase activity [GO:0016491]
J9VG33	WT:uggt	TRUE	0.4	0.279598	16.2163	20.24	4.02366	0	16.2645	CNAG_06737		Probable vacuolar protein sorting-associated protein 16 homolog	endosomal transport [GO:0016197]; intracellular protein transport [GO:0006886]; vacuole fusion, non-autophagic [GO:0042144]	endosome [GO:0005768]; HOPS complex [GO:0030897]	actin binding [GO:0003779]
J9VGL0	WT:uggt	TRUE	0.4	0.207111	11.2199	11.9383	0.718346	0	1.6453	CNAG_00332		Zn(2)-C6 fungal-type domain-containing protein		nucleus [GO:0005634]	DNA-binding transcription factor activity, RNA polymerase II-specific [GO:0000981]; zinc ion binding [GO:0008270]
J9VW18	WT:uggt	TRUE	0.4	0.295278	26.756	26.3655	-0.390452	0	0.762891	CNAG_04604		tryptophan--tRNA ligase (EC 6.1.1.2) (Tryptophanyl-tRNA synthetase)	tryptophanyl-tRNA aminoacylation [GO:0006436]	cytoplasm [GO:0005737]	ATP binding [GO:0005524]; tryptophan-tRNA ligase activity [GO:0004830]
J9W0H1	WT:uggt	TRUE	0.7	0.168864	27.9354	26.0445	-1.8909	0	0.26964	CNAG_07914		Protein phosphatase 2 (Formerly 2A), regulatory subunit A		cytoplasm [GO:0005737]; protein phosphatase type 2A complex [GO:0000159]	protein phosphatase regulator activity [GO:0019888]
O13356	WT:uggt	TRUE	0.4	0.124352	15.0063	21.8078	6.8015	0	111.546	CNAG_03099	CHS1	Chitin synthase 1 (EC 2.4.1.16) (Chitin-UDP acetyl-glucosaminyl transferase 1) (Class-IV chitin synthase 1)	cell wall organization [GO:0071555]; fungal-type cell wall chitin biosynthetic process [GO:0034221]	cell septum [GO:0030428]; plasma membrane [GO:0005886]	chitin synthase activity [GO:0004100]
J9VGZ2	WT:uggt	TRUE	0.1	0.0753988	13.9981	20.5804	6.5823	0	95.8232	CNAG_00510		Prefoldin subunit 2		cytoplasm [GO:0005737]; prefoldin complex [GO:0016272]	protein folding chaperone [GO:0044183]; unfolded protein binding [GO:0051082]
J9VW88	WT:uggt	TRUE	0.1	0.0569525	19.1508	13.3425	-5.80829	0	0.0178455	CNAG_06274		Uncharacterized protein		mitochondrial inner membrane [GO:0005743]
Q6URB0	WT:uggt	TRUE	1	0.935666	24.4599	24.4225	-0.0373364	0	0.974452	CNAG_01138	CCP1	Cytochrome c peroxidase, mitochondrial (CCP) (EC 1.11.1.5)	cellular response to oxidative stress [GO:0034599]; hydrogen peroxide catabolic process [GO:0042744]; response to reactive oxygen species [GO:0000302]	mitochondrial intermembrane space [GO:0005758]; mitochondrial matrix [GO:0005759]	cytochrome-c peroxidase activity [GO:0004130]; heme binding [GO:0020037]; metal ion binding [GO:0046872]
J9VXU8	WT:uggt	TRUE	0.2	0.0956523	19.4659	20.6974	1.23153	0	2.34815	CNAG_03309		Pre-mRNA-splicing factor CWC21	mRNA processing [GO:0006397]	nucleus [GO:0005634]
J9VKL1	WT:uggt	TRUE	0.4	0.250117	24.1256	23.7389	-0.386781	0	0.764834	CNAG_00093		Uncharacterized protein		membrane [GO:0016020]
J9VR65	WT:uggt	TRUE	0.7	0.346196	26.4878	22.6048	-3.88298	0	0.0677809	CNAG_04195		O-methyltransferase	methylation [GO:0032259]		O-methyltransferase activity [GO:0008171]; S-adenosylmethionine-dependent methyltransferase activity [GO:0008757]
J9VJX4	WT:uggt	TRUE	1	0.59816	18.2327	15.5632	-2.66954	0	0.157177	CNAG_02952		COX assembly mitochondrial protein		mitochondrial inner membrane [GO:0005743]
J9VP17	WT:uggt	TRUE	0.1	0.0844488	28.9202	28.3261	-0.594104	0	0.662456	CNAG_05907		Pyruvate carboxylase (EC 6.4.1.1)	gluconeogenesis [GO:0006094]; pyruvate metabolic process [GO:0006090]	cytoplasm [GO:0005737]	ATP binding [GO:0005524]; metal ion binding [GO:0046872]; pyruvate carboxylase activity [GO:0004736]
J9VTD7	WT:uggt	TRUE	0.2	0.351412	22.3592	18.8752	-3.48404	0	0.0893716	CNAG_03456		RWD domain-containing protein	cytoplasmic translation [GO:0002181]
J9VI85	WT:uggt	TRUE	0.7	0.218544	23.9382	24.7458	0.807604	0	1.7503	CNAG_03612		threonine synthase (EC 4.2.3.1)	2-oxobutyrate biosynthetic process [GO:0046360]; serine family amino acid catabolic process [GO:0009071]; threonine biosynthetic process [GO:0009088]		pyridoxal phosphate binding [GO:0030170]; threonine synthase activity [GO:0004795]
J9VR16	WT:uggt	TRUE	0.1	0.198839	26.2807	25.123	-1.15764	0	0.448247	CNAG_06899		26S proteasome regulatory subunit N7	proteasome-mediated ubiquitin-dependent protein catabolic process [GO:0043161]	proteasome regulatory particle [GO:0005838]
J9VIC4	WT:uggt	TRUE	0.7	0.527843	11.2462	11.5661	0.319912	0	1.24825	CNAG_02774		Zn(2)-C6 fungal-type domain-containing protein	DNA-templated transcription [GO:0006351]	nucleus [GO:0005634]	DNA binding [GO:0003677]; DNA-binding transcription factor activity, RNA polymerase II-specific [GO:0000981]; zinc ion binding [GO:0008270]
J9VVN4	WT:uggt	TRUE	0.1	0.00647957	24.1101	23.7189	-0.391172	0	0.76251	CNAG_06098		Glucosamine-6-phosphate isomerase (EC 3.5.99.6) (Glucosamine-6-phosphate deaminase)	carbohydrate metabolic process [GO:0005975]; glucosamine catabolic process [GO:0006043]; N-acetylglucosamine catabolic process [GO:0006046]; N-acetylneuraminate catabolic process [GO:0019262]	cytosol [GO:0005829]	glucosamine-6-phosphate deaminase activity [GO:0004342]; identical protein binding [GO:0042802]
J9VQZ2	WT:uggt	TRUE	0.4	0.214365	26.9729	26.4376	-0.535338	0	0.689997	CNAG_02568		UBA/TS-N domain-containing protein	endocytosis [GO:0006897]; endosomal transport [GO:0016197]	clathrin coat of coated pit [GO:0030132]; nucleus [GO:0005634]	cadherin binding [GO:0045296]; calcium ion binding [GO:0005509]
J9VY42	WT:uggt	TRUE	1	0.992996	23.7461	23.7406	-0.00548284	0	0.996207	CNAG_04679		Histone deacetylase complex subunit		nucleus [GO:0005634]	transcription corepressor activity [GO:0003714]
J9VZ93	WT:uggt	TRUE	0.4	0.112958	17.517	11.287	-6.23005	0	0.013322	CNAG_04329		Uncharacterized protein		membrane [GO:0016020]
J9VWW5	WT:uggt	TRUE	0.1	0.0101562	24.0918	23.6064	-0.485393	0	0.714303	CNAG_04383		Acetyltransferase	mitotic sister chromatid cohesion [GO:0007064]	NatA complex [GO:0031415]	N-acetyltransferase activity [GO:0008080]
J9VSV3	WT:uggt	TRUE	1	0.831565	22.2484	22.6732	0.424799	0	1.34239	CNAG_02120		TIGR01456 family HAD hydrolase	glycerophospholipid biosynthetic process [GO:0046474]	mitochondrion [GO:0005739]	hydrolase activity [GO:0016787]
J9VM27	WT:uggt	TRUE	0.7	0.31525	25.0083	25.8793	0.870966	0	1.82889	CNAG_00622		acetylornithine transaminase (EC 2.6.1.11)	arginine biosynthetic process [GO:0006526]	mitochondrial matrix [GO:0005759]	identical protein binding [GO:0042802]; N2-acetyl-L-ornithine:2-oxoglutarate 5-aminotransferase activity [GO:0003992]; pyridoxal phosphate binding [GO:0030170]
J9VZC3	WT:uggt	TRUE	0.7	0.922199	23.9597	24.0111	0.0513273	0	1.03622	CNAG_01797		Small ribosomal subunit protein mS35 (37S ribosomal protein S24, mitochondrial)	mitochondrial translation [GO:0032543]	mitochondrial small ribosomal subunit [GO:0005763]	structural constituent of ribosome [GO:0003735]
J9VKK7	WT:uggt	TRUE	0.7	0.376428	25.9054	26.5952	0.689741	0	1.61299	CNAG_01148		FK506-binding protein (EC 5.2.1.8)		chromatin [GO:0000785]; nucleolus [GO:0005730]	peptidyl-prolyl cis-trans isomerase activity [GO:0003755]
J9VLS9	WT:uggt	TRUE	0.7	0.135394	20.5706	14.8004	-5.77016	0	0.0183235	CNAG_04049		Serine/threonine protein phosphatase 5 phosphatase	protein targeting to mitochondrion [GO:0006626]	cytosol [GO:0005829]; mitochondrion [GO:0005739]	heat shock protein binding [GO:0031072]
J9VV65	WT:uggt	TRUE	1	0.447244	23.6286	22.0609	-1.56777	0	0.337329	CNAG_03248		Rho GTPase activator	regulation of fungal-type cell wall organization [GO:0060237]; signal transduction [GO:0007165]	cell cortex [GO:0005938]	GTPase activator activity [GO:0005096]
J9VPU4	WT:uggt	TRUE	0.7	0.135954	14.8231	22.0045	7.18139	0	145.149	CNAG_02962		non-specific serine/threonine protein kinase (EC 2.7.11.1)	mRNA cis splicing, via spliceosome [GO:0045292]		ATP binding [GO:0005524]; protein serine/threonine kinase activity [GO:0004674]
J9VFZ9	WT:uggt	TRUE	0.1	0.00104596	20.2951	19.5858	-0.709326	0	0.611606	CNAG_06781		Uncharacterized protein
J9VV13	WT:uggt	TRUE	0.7	0.437862	21.9633	18.7244	-3.23894	0	0.105921	CNAG_02282		Inactive metallocarboxypeptidase ECM14 (Inactive metallocarboxypeptidase ecm14)	proteolysis [GO:0006508]	extracellular space [GO:0005615]	metallocarboxypeptidase activity [GO:0004181]; zinc ion binding [GO:0008270]
J9VFT1	WT:uggt	TRUE	0.1	0.0631732	27.8384	26.7116	-1.12676	0	0.457942	CNAG_00797		Acetyl-coenzyme A synthetase (EC 6.2.1.1)	acetyl-CoA biosynthetic process from acetate [GO:0019427]	cytosol [GO:0005829]; mitochondrion [GO:0005739]	acetate-CoA ligase activity [GO:0003987]; AMP binding [GO:0016208]; ATP binding [GO:0005524]; metal ion binding [GO:0046872]
J9VGV0	WT:uggt	TRUE	0.1	0.049806	29.64	28.8118	-0.828131	0	0.563258	CNAG_03072		phosphopyruvate hydratase (EC 4.2.1.11)	glycolytic process [GO:0006096]	phosphopyruvate hydratase complex [GO:0000015]	magnesium ion binding [GO:0000287]; phosphopyruvate hydratase activity [GO:0004634]
J9VRJ3	WT:uggt	TRUE	0.2	0.355358	24.3497	19.8317	-4.51803	0	0.0436452	CNAG_04346		Dihydrodipicolinate synthase	glyoxylate catabolic process [GO:0009436]	cytosol [GO:0005829]; mitochondrion [GO:0005739]	4-hydroxy-2-oxoglutarate aldolase activity [GO:0008700]; 4-hydroxy-tetrahydrodipicolinate synthase activity [GO:0008840]
J9VNH6	WT:uggt	TRUE	0.7	0.566943	22.4186	23.0087	0.590118	0	1.50537	CNAG_06903		mRNA-decapping enzyme subunit 2	deadenylation-dependent decapping of nuclear-transcribed mRNA [GO:0000290]; nuclear-transcribed mRNA catabolic process, nonsense-mediated decay [GO:0000184]	P-body [GO:0000932]	5'-(N(7)-methylguanosine 5'-triphospho)-[mRNA] hydrolase activity [GO:0140933]; manganese ion binding [GO:0030145]; mRNA 5'-diphosphatase activity [GO:0034353]; RNA binding [GO:0003723]
J9VYX5	WT:uggt	TRUE	0.7	0.434641	23.7982	23.4328	-0.36538	0	0.776265	CNAG_01659		TPR domain-containing protein	protein quality control for misfolded or incompletely synthesized proteins [GO:0006515]	i-AAA complex [GO:0031942]	misfolded protein binding [GO:0051787]
J9VJH2	WT:uggt	TRUE	0.1	0.0765909	22.8088	16.2322	-6.57663	0	0.010477	CNAG_07377		Transformation/transcription domain-associated protein	DNA repair [GO:0006281]; regulation of DNA-templated transcription [GO:0006355]	NuA4 histone acetyltransferase complex [GO:0035267]; nucleus [GO:0005634]; SAGA complex [GO:0000124]
J9VZD9	WT:uggt	TRUE	0.1	0.0633664	24.4105	20.7353	-3.67527	0	0.0782766	CNAG_01818		ATP synthase mitochondrial F1 complex assembly factor 2	mitochondrial proton-transporting ATP synthase complex assembly [GO:0033615]	mitochondrion [GO:0005739]
J9VTA7	WT:uggt	TRUE	1	0.950577	22.4938	22.4878	-0.00602068	0	0.995835	CNAG_04741		Endosome protein	protein transport to vacuole involved in ubiquitin-dependent protein catabolic process via the multivesicular body sorting pathway [GO:0043328]	endoplasmic reticulum [GO:0005783]; membrane [GO:0016020]
T2BN73	WT:uggt	TRUE	0.2	0.248686	25.9776	25.3028	-0.674846	0	0.626399	CNAG_02810		Pumilio-family RNA binding protein, variant	post-transcriptional regulation of gene expression [GO:0010608]	cytoplasm [GO:0005737]	mRNA binding [GO:0003729]
J9VI14	WT:uggt	TRUE	0.1	0.116968	25.3875	18.7057	-6.68186	0	0.00974003	CNAG_02854		thioredoxin-dependent peroxiredoxin (EC 1.11.1.24) (Thioredoxin peroxidase)	cell redox homeostasis [GO:0045454]; cellular response to oxidative stress [GO:0034599]	cytoplasm [GO:0005737]	thioredoxin peroxidase activity [GO:0008379]
J9W1B7	WT:uggt	TRUE	0.1	0.33226	25.7225	20.4813	-5.24117	0	0.0264394	CNAG_01666		U6 snRNA-associated Sm-like protein LSm2	mRNA splicing, via spliceosome [GO:0000398]	catalytic step 2 spliceosome [GO:0071013]; Lsm1-7-Pat1 complex [GO:1990726]; P-body [GO:0000932]; precatalytic spliceosome [GO:0071011]; U4/U6 x U5 tri-snRNP complex [GO:0046540]; U6 snRNP [GO:0005688]	RNA binding [GO:0003723]
J9VM46	WT:uggt	TRUE	0.1	0.107496	23.5926	15.4322	-8.16039	0	0.00349524	CNAG_02280		PRKR-interacting protein 1		nucleolus [GO:0005730]	double-stranded RNA binding [GO:0003725]; protein kinase binding [GO:0019901]; protein kinase inhibitor activity [GO:0004860]
J9VEN6	WT:uggt	TRUE	0.1	0.00496262	25.5821	25.079	-0.503048	0	0.705615	CNAG_00678		Urease accessory protein UreG			GTP binding [GO:0005525]; GTPase activity [GO:0003924]; nickel cation binding [GO:0016151]
J9VXW1	WT:uggt	TRUE	0.1	0.0743419	23.6938	24.9695	1.27563	0	2.42105	CNAG_06016	CAP6	Alpha-1,3-mannosyltransferase
J9VKG9	WT:uggt	TRUE	0.7	0.372353	11.1421	11.5738	0.431652	0	1.34878	CNAG_01186		Uncharacterized protein
J9VSQ1	WT:uggt	TRUE	0.1	0.105738	27.6741	16.6262	-11.0479	0	0.000472332	CNAG_04755		STE/STE11/BCK1 protein kinase			ATP binding [GO:0005524]; MAP kinase kinase kinase activity [GO:0004709]
J9VTX5	WT:uggt	TRUE	0.4	0.173494	16.1647	11.2417	-4.92294	0	0.0329646	CNAG_00967		Endoplasmic reticulum protein		membrane [GO:0016020]
J9VVG5	WT:uggt	TRUE	1	0.420972	11.9517	14.5586	2.60695	0	6.09213	CNAG_02109		Type I inositol-1,4,5-trisphosphate 5-phosphatase 1	phosphatidylinositol dephosphorylation [GO:0046856]		phosphatidylinositol-4,5-bisphosphate 5-phosphatase activity [GO:0004439]
J9VP49	WT:uggt	TRUE	1	0.536188	26.2346	26.1435	-0.0911077	0	0.938802	CNAG_03950		Transcription elongation factor SPT6 (Chromatin elongation factor SPT6)	nucleosome organization [GO:0034728]; transcription elongation-coupled chromatin remodeling [GO:0140673]	transcription elongation factor complex [GO:0008023]	DNA binding [GO:0003677]; histone binding [GO:0042393]; nucleosome binding [GO:0031491]; translation elongation factor activity [GO:0003746]
J9VQP8	WT:uggt	TRUE	0.7	0.23976	24.1557	22.7544	-1.40128	0	0.378594	CNAG_03368		Microtubule Associated protein	cell division [GO:0051301]; establishment or maintenance of microtubule cytoskeleton polarity [GO:0030951]; microtubule polymerization [GO:0046785]; mitotic spindle organization [GO:0007052]	cytoplasm [GO:0005737]; kinetochore [GO:0000776]; microtubule plus-end [GO:0035371]; spindle pole [GO:0000922]; spindle pole body [GO:0005816]	microtubule plus end polymerase [GO:0061863]; microtubule plus-end binding [GO:0051010]
J9W0F1	WT:uggt	TRUE	0.1	0.287623	25.4566	20.3666	-5.08999	0	0.0293604	CNAG_04698		Cytoplasmic protein		cytoplasm [GO:0005737]
J9W1N8	WT:uggt	TRUE	0.1	0.241659	23.4302	18.5183	-4.91184	0	0.0332191	CNAG_05464		Programmed cell death protein 5		cytosol [GO:0005829]; nucleus [GO:0005634]	DNA binding [GO:0003677]
J9VSZ1	WT:uggt	TRUE	0.7	0.42553	18.8458	21.9179	3.07212	0	8.41005	CNAG_04655		Rab family protein		endosome [GO:0005768]; Golgi apparatus [GO:0005794]	GTP binding [GO:0005525]; GTPase activity [GO:0003924]
J9VIA1	WT:uggt	TRUE	0.7	0.226873	27.3636	25.7549	-1.60867	0	0.3279	CNAG_02799		Dihydroxyacetone kinase	anaerobic glycerol catabolic process [GO:0019588]	cytosol [GO:0005829]	ATP binding [GO:0005524]; glycerone kinase activity [GO:0004371]; triokinase activity [GO:0050354]
J9VR92	WT:uggt	TRUE	0.4	0.466838	18.7545	15.0337	-3.72077	0	0.0758464	CNAG_04230		Hydroxyethylthiazole kinase	thiamine biosynthetic process [GO:0009228]; thiamine diphosphate biosynthetic process [GO:0009229]	cytoplasm [GO:0005737]	ATP binding [GO:0005524]; hydroxyethylthiazole kinase activity [GO:0004417]; magnesium ion binding [GO:0000287]; thiamine-phosphate diphosphorylase activity [GO:0004789]
J9VGC9	WT:uggt	TRUE	0.1	0.278038	10.9957	16.309	5.31329	0	39.7611	CNAG_03927		Bola-like protein	protein maturation by [4Fe-4S] cluster transfer [GO:0106035]	mitochondrial matrix [GO:0005759]
J9W411	WT:uggt	TRUE	0.7	0.139084	14.9612	21.1254	6.16422	0	71.7158	CNAG_05524		Glycogen storage control protein		cyclin-dependent protein kinase holoenzyme complex [GO:0000307]; nucleus [GO:0005634]	cyclin-dependent protein serine/threonine kinase regulator activity [GO:0016538]; protein kinase binding [GO:0019901]
J9VYG3	WT:uggt	TRUE	1	0.628389	18.1167	15.6743	-2.44236	0	0.183982	CNAG_01482		Solute carrier family 25 (Mitochondrial phosphate transporter), member 23/24/25/41	ADP transport [GO:0015866]	mitochondrial inner membrane [GO:0005743]	ATP transmembrane transporter activity [GO:0005347]; calcium ion binding [GO:0005509]
J9VYP7	WT:uggt	TRUE	1	0.368413	12.0571	16.469	4.41185	0	21.2863	CNAG_06318	YTM1	Ribosome biogenesis protein YTM1	maturation of 5.8S rRNA from tricistronic rRNA transcript (SSU-rRNA, 5.8S rRNA, LSU-rRNA) [GO:0000466]; maturation of LSU-rRNA from tricistronic rRNA transcript (SSU-rRNA, 5.8S rRNA, LSU-rRNA) [GO:0000463]	nucleoplasm [GO:0005654]; PeBoW complex [GO:0070545]; preribosome, large subunit precursor [GO:0030687]	ribonucleoprotein complex binding [GO:0043021]
J9W248	WT:uggt	TRUE	1	0.516297	11.4985	13.7819	2.28339	0	4.86822	CNAG_09002		Cytochrome b	mitochondrial electron transport, ubiquinol to cytochrome c [GO:0006122]	mitochondrial respiratory chain complex III [GO:0005750]	metal ion binding [GO:0046872]; ubiquinol-cytochrome-c reductase activity [GO:0008121]
J9VL14	WT:uggt	TRUE	0.1	0.343668	19.3035	23.3366	4.03311	0	16.3715	CNAG_01228		ER membrane protein complex subunit 10		EMC complex [GO:0072546]
J9VSH5	WT:uggt	TRUE	0.7	0.486613	14.8247	11.6589	-3.16582	0	0.111428	CNAG_06809		IKS protein kinase		cytosol [GO:0005829]; nucleus [GO:0005634]	ATP binding [GO:0005524]; eukaryotic translation initiation factor 2alpha kinase activity [GO:0004694]
J9VTM7	WT:uggt	TRUE	0.1	0.0954564	22.0252	14.7725	-7.25267	0	0.00655736	CNAG_06659		Beta-hexosaminidase (EC 3.2.1.52)	carbohydrate metabolic process [GO:0005975]; ganglioside catabolic process [GO:0006689]; glycosaminoglycan metabolic process [GO:0030203]	membrane [GO:0016020]	beta-N-acetylglucosaminidase activity [GO:0016231]; N-acetyl-beta-D-galactosaminidase activity [GO:0102148]
J9VKF2	WT:uggt	TRUE	0.2	0.351782	28.1572	21.9768	-6.18036	0	0.0137888	CNAG_02801	TRX1	Thioredoxin		cytosol [GO:0005829]	protein-disulfide reductase activity [GO:0015035]
J9VHR0	WT:uggt	TRUE	0.7	0.554755	23.4564	23.9192	0.462823	0	1.37824	CNAG_00770		DNA mismatch repair protein MSH2	mismatch repair [GO:0006298]; mitotic recombination [GO:0006312]	MutSalpha complex [GO:0032301]	ATP binding [GO:0005524]; ATP-dependent DNA damage sensor activity [GO:0140664]; mismatched DNA binding [GO:0030983]
J9W0X6	WT:uggt	TRUE	0.7	0.258832	26.3654	27.5151	1.14975	0	2.21875	CNAG_06381		DUF221-domain-containing protein		plasma membrane [GO:0005886]	calcium-activated cation channel activity [GO:0005227]
J9VMZ9	WT:uggt	TRUE	0.1	0.296345	11.4981	15.6502	4.15203	0	17.7782	CNAG_06734		DNA-directed RNA polymerase I, II, and III subunit rpabc5	tRNA transcription by RNA polymerase III [GO:0042797]	RNA polymerase I complex [GO:0005736]; RNA polymerase II, core complex [GO:0005665]; RNA polymerase III complex [GO:0005666]	DNA binding [GO:0003677]; RNA polymerase I activity [GO:0001054]; RNA polymerase II activity [GO:0001055]; RNA polymerase III activity [GO:0001056]; zinc ion binding [GO:0008270]
J9VRR9	WT:uggt	TRUE	0.7	0.53033	18.3683	15.0181	-3.35016	0	0.0980621	CNAG_04452		Small ribosomal subunit protein bS18m	mitochondrial translation [GO:0032543]	mitochondrial small ribosomal subunit [GO:0005763]	small ribosomal subunit rRNA binding [GO:0070181]; structural constituent of ribosome [GO:0003735]
J9VMJ3	WT:uggt	TRUE	0.1	0.272843	23.705	19.2547	-4.45033	0	0.0457423	CNAG_02377		Aldehyde dehydrogenase			phenylacetaldehyde dehydrogenase activity [GO:0008957]
J9VT83	WT:uggt	TRUE	0.1	0.00266716	21.1737	21.9923	0.818602	0	1.7637	CNAG_01241		Enzyme regulator
J9VQS6	WT:uggt	TRUE	0.7	0.52822	25.0288	24.6745	-0.354318	0	0.782239	CNAG_01204		ATP synthase subunit 5, mitochondrial	photosynthetic electron transport in photosystem I [GO:0009773]; photosynthetic electron transport in photosystem II [GO:0009772]; proton motive force-driven mitochondrial ATP synthesis [GO:0042776]	mitochondrial proton-transporting ATP synthase, stator stalk [GO:0000274]; plasma membrane [GO:0005886]; proton-transporting ATP synthase complex, catalytic core F(1) [GO:0045261]	proton-transporting ATP synthase activity, rotational mechanism [GO:0046933]
J9VQR9	WT:uggt	TRUE	0.2	0.173503	11.2937	10.4452	-0.848515	0	0.555356	CNAG_01214	OCH1	Alpha-1,6-mannosyltransferase	protein N-linked glycosylation [GO:0006487]	mannan polymerase complex [GO:0000136]	alpha-1,6-mannosyltransferase activity [GO:0000009]
J9VZ34	WT:uggt	TRUE	0.1	0.106542	20.688	24.2537	3.56565	0	11.8404	CNAG_04260		Translation initiation factor eIF2B subunit gamma (eIF2B GDP-GTP exchange factor subunit gamma)	cellular nitrogen compound biosynthetic process [GO:0044271]; cytoplasmic translational initiation [GO:0002183]	cytosol [GO:0005829]; eukaryotic translation initiation factor 2B complex [GO:0005851]; guanyl-nucleotide exchange factor complex [GO:0032045]	guanyl-nucleotide exchange factor activity [GO:0005085]; translation initiation factor activity [GO:0003743]
J9VZY1	WT:uggt	TRUE	0.4	0.422877	11.0709	11.6198	0.548888	0	1.46296	CNAG_04891		Ricin B lectin domain-containing protein
J9VHA6	WT:uggt	TRUE	0.7	0.73637	21.9764	20.4244	-1.55198	0	0.341041	CNAG_04053		rRNA-processing protein FYV7
J9VP67	WT:uggt	TRUE	0.1	0.0881097	29.5681	28.2443	-1.3238	0	0.399482	CNAG_05725		Ketol-acid reductoisomerase, mitochondrial (EC 1.1.1.86) (Acetohydroxy-acid reductoisomerase) (Alpha-keto-beta-hydroxylacyl reductoisomerase)	isoleucine biosynthetic process [GO:0009097]; valine biosynthetic process [GO:0009099]	cytosol [GO:0005829]; mitochondrion [GO:0005739]	isomerase activity [GO:0016853]; ketol-acid reductoisomerase activity [GO:0004455]; metal ion binding [GO:0046872]
J9W498	WT:uggt	TRUE	0.4	0.122183	18.6223	11.7252	-6.89713	0	0.00838988	CNAG_05639		protein-tyrosine-phosphatase (EC 3.1.3.48)	nuclear DNA replication [GO:0033260]	nucleus [GO:0005634]	protein tyrosine phosphatase activity [GO:0004725]; protein tyrosine/serine/threonine phosphatase activity [GO:0008138]
J9VGB0	WT:uggt	TRUE	0.1	0.118852	24.2674	24.8062	0.538755	0	1.45272	CNAG_03673		Serine/threonine-protein phosphatase (EC 3.1.3.16)		cytoplasm [GO:0005737]; nucleus [GO:0005634]	metal ion binding [GO:0046872]; myosin phosphatase activity [GO:0017018]
J9VY77	WT:uggt	TRUE	0.2	0.109607	23.4689	23.7602	0.291284	0	1.22373	CNAG_04631		Ribitol kinase	pentose metabolic process [GO:0019321]	cytoplasm [GO:0005737]	D-ribulokinase activity [GO:0019150]
J9VSU5	WT:uggt	TRUE	0.7	0.777659	22.3741	22.0507	-0.323402	0	0.799183	CNAG_07855		Midasin	ribosomal large subunit export from nucleus [GO:0000055]	nucleolus [GO:0005730]; nucleoplasm [GO:0005654]; preribosome, large subunit precursor [GO:0030687]	ATP binding [GO:0005524]; ATP hydrolysis activity [GO:0016887]
J9VUG2	WT:uggt	TRUE	0.2	0.132817	11.0418	11.8653	0.823489	0	1.76968	CNAG_04310		ABC transporter domain-containing protein			ATP binding [GO:0005524]; ATP hydrolysis activity [GO:0016887]
J9VQM6	WT:uggt	TRUE	0.1	0.0242428	22.0024	22.5078	0.505312	0	1.41943	CNAG_03558		Uncharacterized protein
T2BN35	WT:uggt	TRUE	0.1	0.322421	18.553	22.8832	4.33016	0	20.1144	CNAG_04143		Alpha/beta hydrolase fold-3 domain-containing protein			triglyceride lipase activity [GO:0004806]
J9VX30	WT:uggt	TRUE	0.1	0.0399411	22.6709	22.1166	-0.554254	0	0.681009	CNAG_01734		RNA helicase (EC 3.6.4.13)	mRNA processing [GO:0006397]; RNA splicing [GO:0008380]	catalytic step 2 spliceosome [GO:0071013]	ATP binding [GO:0005524]; helicase activity [GO:0004386]; hydrolase activity [GO:0016787]; RNA binding [GO:0003723]
J9VRK1	WT:uggt	TRUE	0.7	0.511003	19.8284	15.5392	-4.28919	0	0.0511474	CNAG_04356		TPR repeat-containing protein
J9VVY4	WT:uggt	TRUE	0.7	0.274509	22.7601	16.4587	-6.30138	0	0.0126793	CNAG_03560		Carboxylic ester hydrolase (EC 3.1.1.-)			serine hydrolase activity [GO:0017171]
J9VML3	WT:uggt	TRUE	1	0.393833	15.4529	11.4386	-4.01433	0	0.0618824	CNAG_07516		Uncharacterized protein
J9VJ92	WT:uggt	TRUE	0.7	0.240797	24.9412	24.2924	-0.648866	0	0.637781	CNAG_00537		Carnitine O-acetyltransferase	carnitine metabolic process [GO:0009437]	mitochondrion [GO:0005739]; peroxisome [GO:0005777]	carnitine O-acetyltransferase activity [GO:0004092]
J9VNE6	WT:uggt	TRUE	0.7	0.954442	18.414	18.103	-0.31104	0	0.806061	CNAG_01212		Guanosine-3',5'-bis(diphosphate) 3'-pyrophosphohydrolase MESH1 (Metazoan SpoT homolog 1) (Penta-phosphate guanosine-3'-pyrophosphohydrolase)			guanosine-3',5'-bis(diphosphate) 3'-diphosphatase activity [GO:0008893]
J9VH73	WT:uggt	TRUE	0.1	0.246745	22.9148	18.482	-4.43273	0	0.0463036	CNAG_02935		Malonic semialdehyde reductase		cytosol [GO:0005829]	oxidoreductase activity [GO:0016491]
J9VNT9	WT:uggt	TRUE	0.1	0.0100703	22.7208	23.2504	0.529544	0	1.44347	CNAG_01051		Dynactin 1	cytoplasmic microtubule organization [GO:0031122]; establishment of mitotic spindle orientation [GO:0000132]; nuclear migration involved in conjugation with cellular fusion [GO:0000743]	cell tip [GO:0051286]; cytoplasm [GO:0005737]; dynein complex [GO:0030286]; microtubule plus-end [GO:0035371]; nucleus [GO:0005634]; spindle [GO:0005819]; spindle pole body [GO:0005816]	microtubule plus-end binding [GO:0051010]
J9VP04	WT:uggt	TRUE	0.1	0.0728315	24.198	24.4318	0.233722	0	1.17586	CNAG_05080		Calcofluor white hypersensitive protein	fungal-type cell wall organization [GO:0031505]; GPI anchor biosynthetic process [GO:0006506]	endoplasmic reticulum [GO:0005783]; membrane [GO:0016020]	catalytic activity [GO:0003824]
J9VP39	WT:uggt	TRUE	0.2	0.338422	24.0401	19.0833	-4.95681	0	0.0321997	CNAG_05690		Histone deacetylase (EC 3.5.1.98)	negative regulation of transcription by RNA polymerase II [GO:0000122]	NuRD complex [GO:0016581]; Rpd3L-Expanded complex [GO:0070210]	histone deacetylase activity [GO:0004407]; metal ion binding [GO:0046872]
J9VI95	WT:uggt	TRUE	0.7	0.160209	17.6503	11.5967	-6.05363	0	0.0150548	CNAG_03623		Malonic semialdehyde reductase		cytosol [GO:0005829]	oxidoreductase activity [GO:0016491]
J9VQQ4	WT:uggt	TRUE	0.7	0.651019	10.8837	11.1726	0.288925	0	1.22173	CNAG_02661		Asl1-like glycosyl hydrolase catalytic domain-containing protein	fungal-type cell wall polysaccharide metabolic process [GO:0071966]	fungal-type cell wall [GO:0009277]
J9VUL4	WT:uggt	TRUE	0.7	0.887752	11.3778	11.4847	0.106959	0	1.07696	CNAG_04375		(2E,6E)-farnesyl diphosphate synthase (Dimethylallyltranstransferase) (Farnesyl diphosphate synthase) (Farnesyltranstransferase) (Geranylgeranyl diphosphate synthase)	isoprenoid biosynthetic process [GO:0008299]; plastoquinone biosynthetic process [GO:0010236]; ubiquinone biosynthetic process [GO:0006744]	mitochondrion [GO:0005739]; transferase complex [GO:1990234]	prenyltransferase activity [GO:0004659]
J9VJW5	WT:uggt	TRUE	0.1	0.118383	27.9983	26.1914	-1.80691	0	0.285802	CNAG_05260		Glutamate decarboxylase (EC 4.1.1.15)	glutamate catabolic process [GO:0006538]	cytosol [GO:0005829]	glutamate decarboxylase activity [GO:0004351]; pyridoxal phosphate binding [GO:0030170]
J9VXJ4	WT:uggt	TRUE	0.7	0.748594	15.8758	17.4096	1.5338	0	2.89548	CNAG_03173		DNA damage-binding protein 1	DNA repair [GO:0006281]; proteasome-mediated ubiquitin-dependent protein catabolic process [GO:0043161]	nucleus [GO:0005634]; site of double-strand break [GO:0035861]	nucleic acid binding [GO:0003676]
J9VNV6	WT:uggt	TRUE	0.4	0.611614	25.579	25.8359	0.256923	0	1.19493	CNAG_01031		Protein YOP1		membrane [GO:0016020]
J9VF61	WT:uggt	TRUE	0.1	0.0821257	11.8594	10.9932	-0.866212	0	0.548585	CNAG_00831		Nucleoside-diphosphate-sugar epimerase
J9VXT1	WT:uggt	TRUE	0.1	0.164291	18.4107	23.9689	5.5582	0	47.1179	CNAG_03290		STE/STE20/YSK protein kinase		cytoplasm [GO:0005737]	ATP binding [GO:0005524]; protein serine/threonine kinase activity [GO:0004674]
J9VNJ5	WT:uggt	TRUE	0.7	0.143351	18.5884	12.0229	-6.56549	0	0.0105582	CNAG_06543		Ethanolaminephosphotransferase	phospholipid biosynthetic process [GO:0008654]	membrane [GO:0016020]	phosphotransferase activity, for other substituted phosphate groups [GO:0016780]
J9VLG2	WT:uggt	TRUE	0.7	0.18106	16.7013	11.6978	-5.00346	0	0.0311751	CNAG_01054		protein-serine/threonine phosphatase (EC 3.1.3.16)	mRNA processing [GO:0006397]; termination of RNA polymerase II transcription [GO:0006369]	mRNA cleavage and polyadenylation specificity factor complex [GO:0005847]	myosin phosphatase activity [GO:0017018]; RNA polymerase II CTD heptapeptide repeat phosphatase activity [GO:0008420]
J9VPY2	WT:uggt	TRUE	0.1	0.0790565	23.9838	22.0253	-1.95851	0	0.257294	CNAG_02927		Protein disulfide-isomerase	response to endoplasmic reticulum stress [GO:0034976]	endoplasmic reticulum lumen [GO:0005788]	isomerase activity [GO:0016853]; protein-disulfide reductase activity [GO:0015035]
J9VME1	WT:uggt	TRUE	0.1	0.0194074	25.0144	25.5469	0.532551	0	1.44648	CNAG_00730	AFR1	ABC multidrug transporter AFR1		plasma membrane [GO:0005886]	ABC-type transporter activity [GO:0140359]; ATP binding [GO:0005524]; ATP hydrolysis activity [GO:0016887]
J9W102	WT:uggt	TRUE	0.1	0.235574	14.6857	10.6939	-3.9918	0	0.0628562	CNAG_01540		Dehydrogenase	NADPH regeneration [GO:0006740]	cytoplasm [GO:0005737]	nucleotide binding [GO:0000166]; oxidoreductase activity [GO:0016491]
J9VK54	WT:uggt	TRUE	0.7	0.496494	11.5674	11.8771	0.309724	0	1.23947	CNAG_02870		Folylpolyglutamate synthase (EC 6.3.2.17) (Folylpoly-gamma-glutamate synthetase) (Tetrahydrofolylpolyglutamate synthase)	one-carbon metabolic process [GO:0006730]	cytosol [GO:0005829]; mitochondrial inner membrane [GO:0005743]; mitochondrial matrix [GO:0005759]	ATP binding [GO:0005524]; metal ion binding [GO:0046872]; tetrahydrofolylpolyglutamate synthase activity [GO:0004326]
J9VZ76	WT:uggt	TRUE	0.2	0.354552	11.5967	11.1073	-0.489344	0	0.712349	CNAG_04309		Uncharacterized protein
J9VW84	WT:uggt	TRUE	0.1	0.0313045	23.2052	22.3718	-0.833399	0	0.561206	CNAG_07925		Nucleoprotein TPR	mRNA export from nucleus [GO:0006406]; regulation of mitotic spindle assembly [GO:1901673]	nuclear pore [GO:0005643]	structural constituent of nuclear pore [GO:0017056]
J9VJW7	WT:uggt	TRUE	0.7	0.39612	23.7665	19.8099	-3.95658	0	0.0644096	CNAG_02961		F-type H-transporting ATPase subunit J		mitochondrial proton-transporting ATP synthase complex, coupling factor F(o) [GO:0000276]	proton-transporting ATP synthase activity, rotational mechanism [GO:0046933]
J9VQB5	WT:uggt	TRUE	0.1	0.101796	26.0058	23.2617	-2.74414	0	0.149256	CNAG_02209		Nucleolar protein 56		box C/D methylation guide snoRNP complex [GO:0031428]; nucleolus [GO:0005730]; small-subunit processome [GO:0032040]	snoRNA binding [GO:0030515]
J9VIK7	WT:uggt	TRUE	0.7	0.94632	23.5994	23.5302	-0.0691876	0	0.953175	CNAG_05023		Maltose O-acetyltransferase		cytosol [GO:0005829]	acetyltransferase activity [GO:0016407]; O-acyltransferase activity [GO:0008374]
J9VRC7	WT:uggt	TRUE	0.7	0.473347	24.649	25.6896	1.04063	0	2.05712	CNAG_06967		Phytase		membrane [GO:0016020]	acid phosphatase activity [GO:0003993]
J9VGR9	WT:uggt	TRUE	0.4	0.333015	14.5243	11.758	-2.7663	0	0.146981	CNAG_00408		Serine/threonine-protein phosphatase (EC 3.1.3.16)	double-strand break repair via homologous recombination [GO:0000724]	cytoplasm [GO:0005737]; nucleus [GO:0005634]	myosin phosphatase activity [GO:0017018]
J9VS54	WT:uggt	TRUE	0.1	0.0804875	21.0248	14.4872	-6.53764	0	0.010764	CNAG_05927		ATP synthase mitochondrial F1 complex assembly factor 1	mitochondrial proton-transporting ATP synthase complex assembly [GO:0033615]	mitochondrion [GO:0005739]
J9VLF7	WT:uggt	TRUE	0.1	0.0377346	27.0727	27.6064	0.533696	0	1.44763	CNAG_03899		Hypoxia up-regulated 1	endoplasmic reticulum unfolded protein response [GO:0030968]; negative regulation of hypoxia-induced intrinsic apoptotic signaling pathway [GO:1903298]	endoplasmic reticulum chaperone complex [GO:0034663]	ATP binding [GO:0005524]; ATP-dependent protein folding chaperone [GO:0140662]
J9W1A2	WT:uggt	TRUE	0.7	0.884086	26.8362	26.6633	-0.172943	0	0.887031	CNAG_01650		Large subunit ribosomal protein L7	translation [GO:0006412]	cytosolic large ribosomal subunit [GO:0022625]	RNA binding [GO:0003723]; structural constituent of ribosome [GO:0003735]
J9VQG5	WT:uggt	TRUE	0.7	0.349764	20.9861	17.3413	-3.6448	0	0.0799477	CNAG_03497		Trafficking protein particle complex subunit BET3	endoplasmic reticulum to Golgi vesicle-mediated transport [GO:0006888]; intra-Golgi vesicle-mediated transport [GO:0006891]	cis-Golgi network membrane [GO:0033106]; cytosol [GO:0005829]; endoplasmic reticulum [GO:0005783]; TRAPP complex [GO:0030008]
J9VPE6	WT:uggt	TRUE	0.4	0.115819	23.1791	15.1258	-8.05332	0	0.00376451	CNAG_04065	ALG13	UDP-N-acetylglucosamine transferase subunit ALG13 (EC 2.4.1.141) (Asparagine-linked glycosylation protein 13)	dolichol-linked oligosaccharide biosynthetic process [GO:0006488]	endoplasmic reticulum [GO:0005783]	N-acetylglucosaminyldiphosphodolichol N-acetylglucosaminyltransferase activity [GO:0004577]
J9VN60	WT:uggt	TRUE	0.7	0.159049	15.4948	21.9204	6.42559	0	85.9598	CNAG_02657	TIF35	Eukaryotic translation initiation factor 3 subunit G (eIF3g) (Eukaryotic translation initiation factor 3 RNA-binding subunit) (eIF-3 RNA-binding subunit) (Translation initiation factor eIF3 p33 subunit homolog) (eIF3 p33 homolog)	formation of cytoplasmic translation initiation complex [GO:0001732]	eukaryotic 43S preinitiation complex [GO:0016282]; eukaryotic 48S preinitiation complex [GO:0033290]; eukaryotic translation initiation factor 3 complex [GO:0005852]	RNA binding [GO:0003723]; translation initiation factor activity [GO:0003743]
J9W086	WT:uggt	TRUE	0.1	0.0949145	23.2995	24.318	1.0185	0	2.02581	CNAG_06147		Uncharacterized protein
J9VQN4	WT:uggt	TRUE	0.7	0.438176	23.8004	21.8084	-1.99204	0	0.251383	CNAG_03353		Small ribosomal subunit protein uS9m (37S ribosomal protein S9, mitochondrial)	translation [GO:0006412]	mitochondrial small ribosomal subunit [GO:0005763]	RNA binding [GO:0003723]; structural constituent of ribosome [GO:0003735]
J9VRI4	WT:uggt	TRUE	0.1	0.0314151	22.2031	22.7925	0.589377	0	1.5046	CNAG_05683		Uncharacterized protein
J9VNK3	WT:uggt	TRUE	0.4	0.169556	25.5302	26.1524	0.622214	0	1.53924	CNAG_03769		Phosphotransferase (EC 2.7.1.-)	glucose metabolic process [GO:0006006]; glycolytic process [GO:0006096]; intracellular glucose homeostasis [GO:0001678]	cytosol [GO:0005829]; mitochondrion [GO:0005739]	ATP binding [GO:0005524]; fructokinase activity [GO:0008865]; glucokinase activity [GO:0004340]; glucose binding [GO:0005536]
J9VUW0	WT:uggt	TRUE	0.4	0.387882	25.7035	20.9954	-4.70809	0	0.0382581	CNAG_02344		uracil phosphoribosyltransferase (EC 2.4.2.9)			glycosyltransferase activity [GO:0016757]; GTP binding [GO:0005525]
J9VGF6	WT:uggt	TRUE	0.7	0.950214	15.9097	15.4919	-0.417796	0	0.748567	CNAG_03962		DNA replication licensing factor MCM6 (EC 3.6.4.12)	DNA replication initiation [GO:0006270]; DNA unwinding involved in DNA replication [GO:0006268]; double-strand break repair via break-induced replication [GO:0000727]; mitotic DNA replication [GO:1902969]; premeiotic DNA replication [GO:0006279]	DNA replication preinitiation complex [GO:0031261]; MCM complex [GO:0042555]; nuclear pre-replicative complex [GO:0005656]; nuclear replication fork [GO:0043596]	ATP binding [GO:0005524]; ATP hydrolysis activity [GO:0016887]; single-stranded 3'-5' DNA helicase activity [GO:1990518]; single-stranded DNA binding [GO:0003697]
J9VW04	WT:uggt	TRUE	0.7	0.230041	10.9631	11.8697	0.906584	0	1.8746	CNAG_03583		histone acetyltransferase (EC 2.3.1.48)	negative regulation of DNA-templated transcription [GO:0045892]; positive regulation of transcription by RNA polymerase II [GO:0045944]	MOZ/MORF histone acetyltransferase complex [GO:0070776]	histone acetyltransferase activity [GO:0004402]; metal ion binding [GO:0046872]; transcription coregulator activity [GO:0003712]
J9VWV5	WT:uggt	TRUE	0.4	0.280153	24.3534	23.6659	-0.687464	0	0.620945	CNAG_05497		dihydroxy-acid dehydratase (EC 4.2.1.9)	isoleucine biosynthetic process [GO:0009097]; valine biosynthetic process [GO:0009099]	mitochondrion [GO:0005739]	2 iron, 2 sulfur cluster binding [GO:0051537]; dihydroxy-acid dehydratase activity [GO:0004160]; metal ion binding [GO:0046872]
J9VJN0	WT:uggt	TRUE	0.1	0.000405741	23.1331	24.0742	0.941106	0	1.92	CNAG_00690		protein-histidine N-methyltransferase (EC 2.1.1.85)		nucleus [GO:0005634]	protein-L-histidine N-tele-methyltransferase activity [GO:0018064]
P82476	WT:uggt	TRUE	0.2	0.122359	19.0348	11.4583	-7.57651	0	0.00523892	CNAG_01239	CDA3/MP84	Chitin deacetylase 3 (EC 3.5.1.41)	ascospore wall assembly [GO:0030476]; cell wall chitin catabolic process [GO:0006039]; fungal-type cell wall biogenesis [GO:0009272]; polysaccharide catabolic process [GO:0000272]	extracellular region [GO:0005576]; fungal-type cell wall [GO:0009277]; plasma membrane [GO:0005886]; prospore membrane [GO:0005628]; side of membrane [GO:0098552]	chitin binding [GO:0008061]; chitin deacetylase activity [GO:0004099]; metal ion binding [GO:0046872]
J9VWT6	WT:uggt	TRUE	0.2	0.362834	22.9576	19.2826	-3.675	0	0.0782918	CNAG_04348		Chaperone		nucleolus [GO:0005730]; nucleoplasm [GO:0005654]
J9VUN9	WT:uggt	TRUE	0.2	0.345623	23.4121	19.4491	-3.96298	0	0.0641245	CNAG_01756		Mitochondrial import inner membrane translocase subunit TIM22	protein insertion into mitochondrial inner membrane [GO:0045039]	TIM22 mitochondrial import inner membrane insertion complex [GO:0042721]	mitochondrion targeting sequence binding [GO:0030943]; protein transmembrane transporter activity [GO:0008320]
J9W205	WT:uggt	TRUE	0.7	0.735445	21.8117	21.8906	0.0788648	0	1.05619	CNAG_01950		Uncharacterized protein	intronic box C/D snoRNA processing [GO:0034965]; rRNA processing [GO:0006364]; tRNA processing [GO:0008033]	cytosol [GO:0005829]; nucleolar ribonuclease P complex [GO:0005655]; ribonuclease MRP complex [GO:0000172]	ribonuclease MRP activity [GO:0000171]; ribonuclease P activity [GO:0004526]
J9VHP5	WT:uggt	TRUE	0.7	0.487762	24.6774	25.0287	0.35134	0	1.27574	CNAG_02969		Thioesterase	acyl-CoA metabolic process [GO:0006637]	mitochondrion [GO:0005739]	fatty acyl-CoA hydrolase activity [GO:0047617]
J9VKE1	WT:uggt	TRUE	0.1	0.2012	26.2652	19.9046	-6.36053	0	0.01217	CNAG_01222		SAP domain-containing protein
J9VL90	WT:uggt	TRUE	0.1	0.0896472	26.5725	24.7046	-1.86788	0	0.273975	CNAG_03864		ADF-H domain-containing protein	actin filament depolymerization [GO:0030042]; barbed-end actin filament capping [GO:0051016]; positive regulation of neuron projection development [GO:0010976]; regulation of lamellipodium assembly [GO:0010591]; sequestering of actin monomers [GO:0042989]	actin filament [GO:0005884]; myofibril [GO:0030016]	actin filament binding [GO:0051015]; actin monomer binding [GO:0003785]
T2BP75	WT:uggt	TRUE	0.1	0.191409	25.177	19.0783	-6.09866	0	0.0145922	CNAG_00834		Phosphatidylserine decarboxylase, variant	phospholipid biosynthetic process [GO:0008654]		phosphatidylserine decarboxylase activity [GO:0004609]
J9VGJ0	WT:uggt	TRUE	0.7	0.426912	24.9736	20.9213	-4.05225	0	0.0602771	CNAG_00307		Mitochondrial import receptor subunit TOM7	protein import into mitochondrial matrix [GO:0030150]; protein insertion into mitochondrial outer membrane [GO:0045040]	mitochondrial outer membrane translocase complex [GO:0005742]
J9VGX6	WT:uggt	TRUE	0.7	0.151402	11.9511	19.2588	7.3077	0	158.43	CNAG_00490		acetyl-CoA C-acyltransferase (EC 2.3.1.16)	fatty acid beta-oxidation [GO:0006635]; phenylacetate catabolic process [GO:0010124]	peroxisome [GO:0005777]	acetyl-CoA C-acyltransferase activity [GO:0003988]
J9VKE3	WT:uggt	TRUE	0.7	0.482294	15.2376	11.5006	-3.73702	0	0.0749972	CNAG_01419		SPIN90/Ldb17 leucine-rich domain-containing protein	actin cortical patch assembly [GO:0000147]; actin cortical patch localization [GO:0051666]; endocytosis [GO:0006897]	actin cortical patch [GO:0030479]	Arp2/3 complex binding [GO:0071933]
J9VHY5	WT:uggt	TRUE	0.7	0.403681	15.7279	12.0441	-3.68382	0	0.0778143	CNAG_07533		BTB domain-containing protein
J9VNN9	WT:uggt	TRUE	0.1	0.100799	29.1072	29.9289	0.821618	0	1.76739	CNAG_05762		Large subunit acidic ribosomal protein P2	cytoplasmic translational elongation [GO:0002182]	cytosolic large ribosomal subunit [GO:0022625]	structural constituent of ribosome [GO:0003735]
J9VW60	WT:uggt	TRUE	0.2	0.208779	24.3253	18.6647	-5.66066	0	0.0197684	CNAG_06486		Uncharacterized protein
J9VJY9	WT:uggt	TRUE	0.2	0.177443	26.0943	26.5515	0.457258	0	1.37293	CNAG_02936		CCR4-NOT transcription complex subunit 1	negative regulation of translation [GO:0017148]; nuclear-transcribed mRNA catabolic process, deadenylation-dependent decay [GO:0000288]	CCR4-NOT core complex [GO:0030015]; nucleus [GO:0005634]; P-body [GO:0000932]	molecular adaptor activity [GO:0060090]
T2BNN4	WT:uggt	TRUE	0.7	0.451552	23.5603	19.7234	-3.8369	0	0.0699808	CNAG_01278		Phospholipid-transporting ATPase (EC 7.6.2.1)	Golgi organization [GO:0007030]; phospholipid translocation [GO:0045332]	plasma membrane [GO:0005886]; trans-Golgi network [GO:0005802]	ATP binding [GO:0005524]; ATP hydrolysis activity [GO:0016887]; magnesium ion binding [GO:0000287]; phosphatidylethanolamine flippase activity [GO:0090555]
J9VYQ5	WT:uggt	TRUE	0.7	0.442057	15.0284	11.9286	-3.0998	0	0.116645	CNAG_06328		YCII-related domain-containing protein
J9VPA4	WT:uggt	TRUE	0.7	0.130805	22.826	15.6656	-7.1604	0	0.00699043	CNAG_05139		Solute carrier family 35 (UDP-sugar transporter), member A1/2/3	UDP-galactose transmembrane import into Golgi lumen [GO:0097624]	Golgi membrane [GO:0000139]	UDP-galactose transmembrane transporter activity [GO:0005459]
J9VRP3	WT:uggt	TRUE	1	0.695963	11.0626	10.7339	-0.328631	0	0.796292	CNAG_04411		Uncharacterized protein		nucleolus [GO:0005730]
J9VGC3	WT:uggt	TRUE	0.4	0.323556	16.0182	11.1563	-4.86194	0	0.0343882	CNAG_03917		Nuclear pore complex protein Nup85	mRNA export from nucleus [GO:0006406]; positive regulation of DNA-templated transcription [GO:0045893]; protein import into nucleus [GO:0006606]	nuclear membrane [GO:0031965]; nuclear pore outer ring [GO:0031080]	structural constituent of nuclear pore [GO:0017056]
J9W1G2	WT:uggt	TRUE	0.1	0.109714	23.1839	15.4644	-7.71952	0	0.00474454	CNAG_05416		Pre-mRNA-processing protein 45	mRNA splicing, via spliceosome [GO:0000398]	spliceosomal complex [GO:0005681]
J9VSL1	WT:uggt	TRUE	0.7	0.705906	27.9279	28.1644	0.236484	0	1.17812	CNAG_04799		Large subunit ribosomal protein L14e	ribosomal large subunit biogenesis [GO:0042273]; translation [GO:0006412]	cytosolic large ribosomal subunit [GO:0022625]	RNA binding [GO:0003723]; structural constituent of ribosome [GO:0003735]
J9VX11	WT:uggt	TRUE	0.1	0.0408369	25.3524	24.6442	-0.708189	0	0.612088	CNAG_04444		Splicing factor 3B subunit 1	spliceosomal complex assembly [GO:0000245]	catalytic step 2 spliceosome [GO:0071013]; U12-type spliceosomal complex [GO:0005689]; U2 snRNP [GO:0005686]; U2-type prespliceosome [GO:0071004]	mRNA binding [GO:0003729]
T2BMT6	WT:uggt	TRUE	0.1	0.189538	23.9443	17.9945	-5.94981	0	0.0161781	CNAG_05734		Actin cytoskeleton-regulatory complex protein SLA1	actin cortical patch assembly [GO:0000147]	actin cortical patch [GO:0030479]; endosome membrane [GO:0010008]; nucleus [GO:0005634]; plasma membrane [GO:0005886]	cytoskeletal protein binding [GO:0008092]; identical protein binding [GO:0042802]; protein-macromolecule adaptor activity [GO:0030674]; ubiquitin binding [GO:0043130]
J9VE30	WT:uggt	TRUE	0.1	0.0824028	20.8525	14.4351	-6.41742	0	0.0116994	CNAG_00424		choline-phosphate cytidylyltransferase (EC 2.7.7.15)		nuclear envelope [GO:0005635]	choline-phosphate cytidylyltransferase activity [GO:0004105]; phosphatidylcholine binding [GO:0031210]
J9VWN8	WT:uggt	TRUE	0.1	0.133886	25.6384	19.0799	-6.55843	0	0.01061	CNAG_04283	FLC1	TRP-like ion channel protein flc1 (EC 7.-.-.-)	fungal-type cell wall biogenesis [GO:0009272]; transmembrane transport [GO:0055085]	endoplasmic reticulum membrane [GO:0005789]
J9W1V9	WT:uggt	TRUE	0.4	0.352693	11.4057	11.8185	0.412727	0	1.3312	CNAG_05557	MMM1	Maintenance of mitochondrial morphology protein 1	mitochondrial genome maintenance [GO:0000002]; mitochondrion-endoplasmic reticulum membrane tethering [GO:1990456]; phospholipid transport [GO:0015914]; protein insertion into mitochondrial outer membrane [GO:0045040]	endoplasmic reticulum membrane [GO:0005789]; ERMES complex [GO:0032865]	lipid binding [GO:0008289]
J9VTH7	WT:uggt	TRUE	0.1	0.0641638	26.9232	25.3981	-1.5251	0	0.347455	CNAG_01126		Guanine nucleotide exchange protein for ADP-robosylation factor	Golgi vesicle transport [GO:0048193]; protein transport [GO:0015031]; regulation of ARF protein signal transduction [GO:0032012]	cytosol [GO:0005829]; trans-Golgi network [GO:0005802]	guanyl-nucleotide exchange factor activity [GO:0005085]
J9W1V5	WT:uggt	TRUE	0.7	0.252612	25.1285	24.5932	-0.53532	0	0.690006	CNAG_05552		Transcription activator snf2l1	nucleosome organization [GO:0034728]; regulation of transcription by RNA polymerase II [GO:0006357]	chromatin [GO:0000785]; nucleus [GO:0005634]	ATP binding [GO:0005524]; ATP hydrolysis activity [GO:0016887]; ATP-dependent chromatin remodeler activity [GO:0140658]; DNA binding [GO:0003677]; histone binding [GO:0042393]; nucleosome binding [GO:0031491]
J9VLU9	WT:uggt	TRUE	0.7	0.274378	25.0113	19.822	-5.1893	0	0.0274073	CNAG_00543		Thiol methyltransferase 1	methylation [GO:0032259]		S-adenosylmethionine-dependent methyltransferase activity [GO:0008757]
J9VV87	WT:uggt	TRUE	0.2	0.416451	16.8581	13.5002	-3.3579	0	0.0975376	CNAG_04885		Uncharacterized protein
J9W0R4	WT:uggt	TRUE	0.7	0.633477	27.1274	27.0031	-0.124284	0	0.91746	CNAG_07863		26S proteasome regulatory subunit RPN1	proteasome-mediated ubiquitin-dependent protein catabolic process [GO:0043161]; regulation of protein catabolic process [GO:0042176]	nucleus [GO:0005634]; proteasome regulatory particle, base subcomplex [GO:0008540]; proteasome storage granule [GO:0034515]	enzyme regulator activity [GO:0030234]
O13465	WT:uggt	TRUE	0.2	0.120208	25.4309	24.9736	-0.457323	0	0.728336	CNAG_05540	URE1	Urease (EC 3.5.1.5) (Urea amidohydrolase)	urea catabolic process [GO:0043419]	urease complex [GO:0035550]	nickel cation binding [GO:0016151]; urease activity [GO:0009039]
J9VUM1	WT:uggt	TRUE	0.7	0.467844	18.6592	14.6995	-3.9597	0	0.0642706	CNAG_03096		UDP-glucose 4-epimerase
J9VWQ9	WT:uggt	TRUE	0.4	0.245489	10.7715	14.4393	3.66774	0	12.7086	CNAG_04313		NADPH2 dehydrogenase		cytosol [GO:0005829]	FMN binding [GO:0010181]; NADPH dehydrogenase activity [GO:0003959]
J9VD30	WT:uggt	TRUE	0.7	0.470161	18.8803	22.0316	3.15133	0	8.88475	CNAG_00044		Ribosome assembly protein 1	cytosolic ribosome assembly [GO:0042256]	cytosol [GO:0005829]; ribonucleoprotein complex [GO:1990904]	GTP binding [GO:0005525]; GTPase activity [GO:0003924]; ribosome binding [GO:0043022]; translation elongation factor activity [GO:0003746]
J9VTD1	WT:uggt	TRUE	0.7	0.149255	11.8487	19.8745	8.02586	0	260.63	CNAG_01507		EKC/KEOPS complex subunit CGI121 (EKC/KEOPS complex subunit cgi121)	tRNA threonylcarbamoyladenosine modification [GO:0002949]	cytosol [GO:0005829]; EKC/KEOPS complex [GO:0000408]; nucleus [GO:0005634]
J9VWU3	WT:uggt	TRUE	0.2	0.360502	24.5111	19.7618	-4.74926	0	0.0371817	CNAG_04358	ATM1	Iron-sulfur clusters transporter ATM1, mitochondrial (EC 7.-.-.-)	intracellular iron ion homeostasis [GO:0006879]; iron-sulfur cluster assembly [GO:0016226]; iron-sulfur cluster export from the mitochondrion [GO:0140466]	mitochondrial inner membrane [GO:0005743]; mitochondrial membrane [GO:0031966]	ABC-type transporter activity [GO:0140359]; ATP binding [GO:0005524]; ATP hydrolysis activity [GO:0016887]
J9VS61	WT:uggt	TRUE	1	0.406441	25.4952	23.9435	-1.55168	0	0.341112	CNAG_05932		peptidylprolyl isomerase (EC 5.2.1.8)		cytosol [GO:0005829]; intracellular membrane-bounded organelle [GO:0043231]; plasma membrane [GO:0005886]	peptidyl-prolyl cis-trans isomerase activity [GO:0003755]
J9VX05	WT:uggt	TRUE	0.1	0.115306	27.2786	21.9168	-5.36189	0	0.024317	CNAG_05555		60S ribosomal protein L8	maturation of LSU-rRNA [GO:0000470]	cytosolic large ribosomal subunit [GO:0022625]	RNA binding [GO:0003723]
J9W2V9	WT:uggt	TRUE	0.1	0.299994	23.7277	19.309	-4.41872	0	0.0467555	CNAG_06242		High-affinity iron permease CaFTR1		high-affinity iron permease complex [GO:0033573]	ferrous iron transmembrane transporter activity [GO:0015093]
J9VNW3	WT:uggt	TRUE	1	0.92347	11.5934	11.6197	0.0262874	0	1.01839	CNAG_05039		Rab-GAP TBC domain-containing protein
J9VTA5	WT:uggt	TRUE	1	0.630014	17.7598	14.9415	-2.81833	0	0.141775	CNAG_01213		Uncharacterized protein		NatB complex [GO:0031416]
J9VPM5	WT:uggt	TRUE	1	0.382166	22.2217	18.8877	-3.334	0	0.0991667	CNAG_03039		DNA damage-inducible protein 1	proteolysis [GO:0006508]		aspartic-type endopeptidase activity [GO:0004190]
J9VWW2	WT:uggt	TRUE	0.7	0.131704	20.6738	11.4981	-9.17576	0	0.00172911	CNAG_07884		37S ribosomal protein S35, mitochondrial	mitochondrial translation [GO:0032543]	mitochondrial small ribosomal subunit [GO:0005763]	structural constituent of ribosome [GO:0003735]
J9VP82	WT:uggt	TRUE	1	0.885782	11.9488	11.9144	-0.0343706	0	0.976458	CNAG_03995		FUN14 family protein		membrane [GO:0016020]
J9VGL8	WT:uggt	TRUE	0.4	0.123157	26.2764	25.4089	-0.867527	0	0.548086	CNAG_04032		AFG3 family protein	mitochondrial protein processing [GO:0034982]	m-AAA complex [GO:0005745]	ATP binding [GO:0005524]; ATP hydrolysis activity [GO:0016887]; ATP-dependent peptidase activity [GO:0004176]; metalloendopeptidase activity [GO:0004222]; zinc ion binding [GO:0008270]
J9VGU1	WT:uggt	TRUE	0.1	0.156955	23.3376	22.1002	-1.23743	0	0.424128	CNAG_03081		ATP-dependent RNA helicase (EC 3.6.4.13)	Group II intron splicing [GO:0000373]	cytoplasm [GO:0005737]; nucleus [GO:0005634]	ATP binding [GO:0005524]; helicase activity [GO:0004386]; hydrolase activity [GO:0016787]; RNA binding [GO:0003723]
J9VUL7	WT:uggt	TRUE	0.4	0.337092	18.7433	22.7701	4.02682	0	16.3003	CNAG_01973		C2H2 zinc finger protein Zas1A	DNA-templated transcription [GO:0006351]	chromatin [GO:0000785]	DNA-binding transcription factor activity, RNA polymerase II-specific [GO:0000981]; RNA polymerase II cis-regulatory region sequence-specific DNA binding [GO:0000978]; zinc ion binding [GO:0008270]
J9VFX2	WT:uggt	TRUE	0.1	0.350161	18.5386	22.0986	3.56002	0	11.7943	CNAG_00852		Phosphatidate cytidylyltransferase	phosphatidic acid biosynthetic process [GO:0006654]	membrane [GO:0016020]	ATP-dependent diacylglycerol kinase activity [GO:0004143]
J9VIM6	WT:uggt	TRUE	0.7	0.490842	21.9413	22.123	0.181635	0	1.13417	CNAG_00290		Peptide hydrolase (EC 3.4.-.-)	proteolysis [GO:0006508]		aminopeptidase activity [GO:0004177]; metal ion binding [GO:0046872]; metalloexopeptidase activity [GO:0008235]
J9VU02	WT:uggt	TRUE	0.1	0.227253	14.0399	11.2681	-2.77185	0	0.146417	CNAG_04146		SET domain-containing protein
J9VRT9	WT:uggt	TRUE	0.7	0.260818	24.3263	22.8268	-1.4995	0	0.353677	CNAG_02494		Pheromone-processing carboxypeptidase KEX1 (EC 3.4.16.6) (Carboxypeptidase D) (Pheromone-processing carboxypeptidase kex1)	apoptotic process [GO:0006915]; proteolysis [GO:0006508]	membrane [GO:0016020]; trans-Golgi network [GO:0005802]	serine-type carboxypeptidase activity [GO:0004185]
J9VWF8	WT:uggt	TRUE	0.1	0.0500408	25.1251	14.9574	-10.1677	0	0.000869418	CNAG_05385		Conserved oligomeric Golgi complex subunit 6 (COG complex subunit 6) (Component of oligomeric Golgi complex 6)	intra-Golgi vesicle-mediated transport [GO:0006891]; protein transport [GO:0015031]	Golgi membrane [GO:0000139]; Golgi transport complex [GO:0017119]
J9W0A4	WT:uggt	TRUE	0.1	0.104686	15.8558	23.527	7.67121	0	203.828	CNAG_04772		RRM domain-containing protein	positive regulation of meiotic nuclear division [GO:0045836]; regulation of DNA-templated transcription [GO:0006355]	Nrd1 complex [GO:0035649]; nucleus [GO:0005634]	RNA binding [GO:0003723]
J9VFZ8	WT:uggt	TRUE	0.4	0.901091	18.4339	17.8757	-0.558179	0	0.679159	CNAG_00134		F-box domain-containing protein
J9VQY5	WT:uggt	TRUE	1	0.42341	15.7119	11.6273	-4.08461	0	0.0589398	CNAG_02577		Ceramide very long chain fatty acid hydroxylase (EC 1.-.-.-)	fatty acid biosynthetic process [GO:0006633]	endoplasmic reticulum membrane [GO:0005789]	fatty acid alpha-hydroxylase activity [GO:0080132]; heme binding [GO:0020037]; iron ion binding [GO:0005506]
J9VML7	WT:uggt	TRUE	1	0.588187	26.842	26.5584	-0.283627	0	0.821523	CNAG_00774		Phosphoglycerate dehydrogenase	amino acid metabolic process [GO:0006520]; carboxylic acid metabolic process [GO:0019752]		NAD binding [GO:0051287]; oxidoreductase activity, acting on the CH-OH group of donors, NAD or NADP as acceptor [GO:0016616]
J9VLH7	WT:uggt	TRUE	0.4	0.200902	23.5055	22.4904	-1.01516	0	0.494773	CNAG_05036		Uncharacterized protein		membrane [GO:0016020]
J9VX83	WT:uggt	TRUE	0.4	0.354422	26.2753	21.1912	-5.08407	0	0.0294809	CNAG_01799		Cytochrome b-c1 complex subunit 8 (Complex III subunit 8)	mitochondrial electron transport, ubiquinol to cytochrome c [GO:0006122]	mitochondrial respiratory chain complex III [GO:0005750]
J9W420	WT:uggt	TRUE	0.4	0.226606	24.6822	23.1547	-1.52749	0	0.346879	CNAG_05534		Pyridoxal reductase		cytoplasm [GO:0005737]	aldo-keto reductase (NADPH) activity [GO:0004033]
J9VPH9	WT:uggt	TRUE	0.7	0.363382	26.115	24.7579	-1.35711	0	0.390362	CNAG_05844		Mitochondrial import inner membrane translocase subunit	protein transport [GO:0015031]	mitochondrial inner membrane [GO:0005743]
T2BNT5	WT:uggt	TRUE	0.7	0.342825	19.3779	24.096	4.71813	0	26.3208	CNAG_07978		Uncharacterized protein		trans-Golgi network [GO:0005802]
J9VI77	WT:uggt	TRUE	0.1	0.0990339	23.9828	17.7082	-6.27453	0	0.0129174	CNAG_03602		U3 small nucleolar RNA-associated protein 5	maturation of SSU-rRNA from tricistronic rRNA transcript (SSU-rRNA, 5.8S rRNA, LSU-rRNA) [GO:0000462]	nucleolus [GO:0005730]
J9VZ38	WT:uggt	TRUE	0.4	0.300044	22.8065	17.9376	-4.86891	0	0.0342225	CNAG_04265		VHS domain-containing protein	actin cortical patch localization [GO:0051666]; actin filament organization [GO:0007015]; endocytosis [GO:0006897]; intracellular protein transport [GO:0006886]; vacuolar transport [GO:0007034]	actin cortical patch [GO:0030479]	phosphatidylinositol binding [GO:0035091]; ubiquitin binding [GO:0043130]
J9VM04	WT:uggt	TRUE	0.2	0.103996	25.4247	23.942	-1.4827	0	0.357819	CNAG_02550		Uncharacterized protein
J9VUJ8	WT:uggt	TRUE	0.1	0.0711773	22.704	24.153	1.44901	0	2.7302	CNAG_02459		Atypical/ABC1/ABC1-A protein kinase	ubiquinone biosynthetic process [GO:0006744]		kinase activity [GO:0016301]
J9VPV9	WT:uggt	TRUE	0.4	0.12144	25.3365	24.2733	-1.06316	0	0.478581	CNAG_05977		Proteasome activator subunit 4	DNA repair [GO:0006281]; proteasomal ubiquitin-independent protein catabolic process [GO:0010499]	cytosol [GO:0005829]; nucleus [GO:0005634]; proteasome complex [GO:0000502]	lysine-acetylated histone binding [GO:0070577]; peptidase activator activity [GO:0016504]; proteasome binding [GO:0070628]
J9VPK5	WT:uggt	TRUE	0.7	0.704175	12.0236	11.4055	-0.618124	0	0.651517	CNAG_07825		Retrograde transport protein Dsl1 C-terminal domain-containing protein	endoplasmic reticulum to Golgi vesicle-mediated transport [GO:0006888]; mitotic spindle assembly checkpoint signaling [GO:0007094]	cytoplasm [GO:0005737]; RZZ complex [GO:1990423]
J9W034	WT:uggt	TRUE	0.2	0.181062	11.7693	12.0011	0.231781	0	1.17428	CNAG_05655	CML1	Calmodulin-like protein 1	spindle pole body duplication [GO:0030474]	half bridge of spindle pole body [GO:0005825]; mitotic spindle pole body [GO:0044732]	calcium ion binding [GO:0005509]; microtubule binding [GO:0008017]
J9VPB1	WT:uggt	TRUE	0.7	0.492974	22.8819	19.8781	-3.00377	0	0.124673	CNAG_03103		Cullin 3	DNA damage response [GO:0006974]; protein ubiquitination [GO:0016567]; ubiquitin-dependent protein catabolic process [GO:0006511]	Cul4-RING E3 ubiquitin ligase complex [GO:0080008]	ubiquitin protein ligase binding [GO:0031625]
J9VVV4	WT:uggt	TRUE	0.1	0.0852205	27.5709	27.8467	0.275814	0	1.21068	CNAG_04687		Stearoyl-CoA desaturase (Delta-9 desaturase)	unsaturated fatty acid biosynthetic process [GO:0006636]	endoplasmic reticulum membrane [GO:0005789]	16:0 monogalactosyldiacylglycerol desaturase activity [GO:0009979]; heme binding [GO:0020037]; iron ion binding [GO:0005506]; stearoyl-CoA 9-desaturase activity [GO:0004768]
J9VPZ7	WT:uggt	TRUE	0.2	0.278929	29.0645	26.7243	-2.34022	0	0.19748	CNAG_03316		Rho GDP-dissociation inhibitor	Rho protein signal transduction [GO:0007266]	cytosol [GO:0005829]; membrane [GO:0016020]	Rho GDP-dissociation inhibitor activity [GO:0005094]
J9VYP0	WT:uggt	TRUE	1	0.598307	11.3121	11.6849	0.372803	0	1.29487	CNAG_06311		Golgi apparatus membrane protein TVP38 (Golgi apparatus membrane protein tvp38)		membrane [GO:0016020]
J9W0N0	WT:uggt	TRUE	1	0.852834	23.9551	23.8159	-0.139123	0	0.908071	CNAG_04605		Sterol-4alpha-carboxylate 3-dehydrogenase (Decarboxylating)	steroid biosynthetic process [GO:0006694]		3-beta-hydroxy-delta5-steroid dehydrogenase activity [GO:0003854]
J9VL23	WT:uggt	TRUE	0.1	0.0609492	29.1882	27.4696	-1.71862	0	0.30384	CNAG_07445		Transketolase (EC 2.2.1.1)	pentose-phosphate shunt [GO:0006098]	cytosol [GO:0005829]; nucleus [GO:0005634]	metal ion binding [GO:0046872]; transketolase activity [GO:0004802]
J9VR09	WT:uggt	TRUE	0.4	0.369248	11.4417	15.4826	4.04085	0	16.4595	CNAG_03483	GET1	Protein GET1	tail-anchored membrane protein insertion into ER membrane [GO:0071816]	endoplasmic reticulum membrane [GO:0005789]; GET complex [GO:0043529]	protein-membrane adaptor activity [GO:0043495]
J9VXG5	WT:uggt	TRUE	0.1	0.0565194	24.0818	16.6387	-7.44308	0	0.0057466	CNAG_05507		Small subunit ribosomal protein S8	translation [GO:0006412]	ribonucleoprotein complex [GO:1990904]; ribosome [GO:0005840]	structural constituent of ribosome [GO:0003735]
J9VQC7	WT:uggt	TRUE	0.4	0.276537	25.1098	25.3174	0.207538	0	1.15472	CNAG_07719		26S protease regulatory subunit 7	proteasome-mediated ubiquitin-dependent protein catabolic process [GO:0043161]	cytoplasm [GO:0005737]; proteasome regulatory particle, base subcomplex [GO:0008540]	ATP binding [GO:0005524]; ATP hydrolysis activity [GO:0016887]; peptidase activity [GO:0008233]; proteasome-activating activity [GO:0036402]
J9VWG2	WT:uggt	TRUE	1	0.90838	27.0545	26.9692	-0.0853127	0	0.94258	CNAG_05722	ALA1	Alanine--tRNA ligase (EC 6.1.1.7) (Alanyl-tRNA synthetase) (AlaRS)	mitochondrial alanyl-tRNA aminoacylation [GO:0070143]; negative regulation of DNA-templated transcription [GO:0045892]	cytosol [GO:0005829]; mitochondrion [GO:0005739]	alanine-tRNA ligase activity [GO:0004813]; aminoacyl-tRNA editing activity [GO:0002161]; ATP binding [GO:0005524]; tRNA binding [GO:0000049]; zinc ion binding [GO:0008270]
J9VJY5	WT:uggt	TRUE	0.1	0.306129	25.2003	24.224	-0.976314	0	0.508277	CNAG_01361		Importin subunit alpha	NLS-bearing protein import into nucleus [GO:0006607]	cytoplasm [GO:0005737]; nucleoplasm [GO:0005654]	nuclear import signal receptor activity [GO:0061608]; nuclear localization sequence binding [GO:0008139]
J9VXW4	WT:uggt	TRUE	0.4	0.141304	16.8414	11.7251	-5.11629	0	0.02883	CNAG_03324		Suppressor of action mutation 2-like protein	endocytic recycling [GO:0032456]; Golgi to vacuole transport [GO:0006896]; protein transport [GO:0015031]; retrograde transport, endosome to Golgi [GO:0042147]	cytosol [GO:0005829]; GARP complex [GO:0000938]	syntaxin binding [GO:0019905]
J9VQZ0	WT:uggt	TRUE	0.7	0.873354	18.8542	19.7781	0.923929	0	1.89728	CNAG_03458	SWI6	Chromatin-associated protein SWI6	chromatin remodeling [GO:0006338]; negative regulation of transcription by RNA polymerase II [GO:0000122]	nucleus [GO:0005634]; pericentric heterochromatin [GO:0005721]	chromatin binding [GO:0003682]; methylated histone binding [GO:0035064]; organic cyclic compound binding [GO:0097159]
T2BPC9	WT:uggt	TRUE	0.7	0.456558	21.3673	18.5349	-2.83241	0	0.140397	CNAG_03946		Galactokinase (EC 2.7.1.6) (Galactose kinase)	galactose metabolic process [GO:0006012]	cytosol [GO:0005829]	ATP binding [GO:0005524]; galactokinase activity [GO:0004335]
J9VR81	WT:uggt	TRUE	0.2	0.104404	26.2161	27.2959	1.07983	0	2.11379	CNAG_01018		Eukaryotic translation initiation factor 2 subunit gamma (eIF2-gamma) (EC 3.6.5.3)	cytoplasmic translational initiation [GO:0002183]; formation of translation preinitiation complex [GO:0001731]; methylation [GO:0032259]; selenocysteine metabolic process [GO:0016259]	cytosol [GO:0005829]; eukaryotic translation initiation factor 2 complex [GO:0005850]	GTP binding [GO:0005525]; GTPase activity [GO:0003924]; methionyl-initiator methionine tRNA binding [GO:1990856]; methyltransferase activity [GO:0008168]; selenocysteine insertion sequence binding [GO:0035368]; translation initiation factor activity [GO:0003743]
J9VK85	WT:uggt	TRUE	0.7	0.489038	22.8281	19.6347	-3.19338	0	0.109319	CNAG_02842		Large ribosomal subunit protein mL46		mitochondrial large ribosomal subunit [GO:0005762]	structural constituent of ribosome [GO:0003735]
J9VI89	WT:uggt	TRUE	0.2	0.226736	29.7478	28.8092	-0.938661	0	0.521717	CNAG_06906	TIF3	Probable eukaryotic translation initiation factor 4H		nucleus [GO:0005634]; P-body [GO:0000932]	poly(A) binding [GO:0008143]; translation initiation factor activity [GO:0003743]
J9VGH9	WT:uggt	TRUE	0.4	0.386945	22.776	23.399	0.623013	0	1.54009	CNAG_00292		Zinc finger protein	axon development [GO:0061564]; Cajal body organization [GO:0030576]; positive regulation of gene expression [GO:0010628]; positive regulation of protein import into nucleus [GO:0042307]	Cajal body [GO:0015030]; cytoplasm [GO:0005737]	translation initiation factor binding [GO:0031369]; zinc ion binding [GO:0008270]
J9VJQ5	WT:uggt	TRUE	0.4	0.341196	20.7041	17.6131	-3.09104	0	0.117356	CNAG_03032		Dynactin 2	mitotic spindle organization [GO:0007052]	cytoplasm [GO:0005737]; dynactin complex [GO:0005869]
J9VTC4	WT:uggt	TRUE	1	0.586509	16.9512	14.4318	-2.5194	0	0.174416	CNAG_06584		Uncharacterized protein		fungal-type vacuole membrane [GO:0000329]	transmembrane transporter activity [GO:0022857]
J9VV60	WT:uggt	TRUE	0.2	0.123701	14.9581	22.1733	7.21518	0	148.589	CNAG_02225	EXG104	glucan 1,3-beta-glucosidase (EC 3.2.1.58)	glucan catabolic process [GO:0009251]	cell surface [GO:0009986]; extracellular region [GO:0005576]	glucan exo-1,3-beta-glucosidase activity [GO:0004338]
T2BPF7	WT:uggt	TRUE	0.2	0.114947	27.4487	17.1812	-10.2676	0	0.000811258	CNAG_04314		NAD kinase, variant	NAD metabolic process [GO:0019674]; NADP biosynthetic process [GO:0006741]		NAD+ kinase activity [GO:0003951]
J9VFL9	WT:uggt	TRUE	0.1	0.0815179	17.8922	11.3733	-6.51887	0	0.010905	CNAG_00008		Cell cycle arrest in response to pheromone-related protein	cytoskeleton organization [GO:0007010]	cytosol [GO:0005829]
J9VFZ1	WT:uggt	TRUE	0.4	0.12219	19.2956	11.7867	-7.50892	0	0.00549024	CNAG_06792		Protein-vacuolar targeting-related protein	late endosome to vacuole transport via multivesicular body sorting pathway [GO:0032511]; protein targeting to vacuole [GO:0006623]	fungal-type vacuole membrane [GO:0000329]; Vps55/Vps68 complex [GO:0034424]
J9VL11	WT:uggt	TRUE	0.1	0.0843998	27.1877	25.6384	-1.54924	0	0.341689	CNAG_03787		Tubulin alpha chain	microtubule cytoskeleton organization [GO:0000226]; mitotic cell cycle [GO:0000278]; nuclear division [GO:0000280]; nuclear migration by microtubule mediated pushing forces [GO:0098863]	cytoplasm [GO:0005737]; microtubule [GO:0005874]; nucleus [GO:0005634]; spindle [GO:0005819]	GTP binding [GO:0005525]; hydrolase activity [GO:0016787]; structural constituent of cytoskeleton [GO:0005200]
J9VHC9	WT:uggt	TRUE	0.7	0.53175	23.8956	23.2969	-0.598715	0	0.660342	CNAG_04078		Oligosaccharyltransferase complex subunit gamma	protein N-linked glycosylation via asparagine [GO:0018279]	oligosaccharyltransferase complex [GO:0008250]	transferase activity [GO:0016740]
J9W1A8	WT:uggt	TRUE	1	0.579638	23.1808	20.1496	-3.03116	0	0.122329	CNAG_05353		Nuclear pore complex protein Nup133	poly(A)+ mRNA export from nucleus [GO:0016973]; protein import into nucleus [GO:0006606]; transcription-dependent tethering of RNA polymerase II gene DNA at nuclear periphery [GO:0000972]	nuclear pore outer ring [GO:0031080]	structural constituent of nuclear pore [GO:0017056]
J9VL24	WT:uggt	TRUE	0.7	0.867554	22.0734	22.0877	0.0142847	0	1.00995	CNAG_03808		Aromatic amino acid aminotransferase I	alpha-amino acid metabolic process [GO:1901605]; biosynthetic process [GO:0009058]		pyridoxal phosphate binding [GO:0030170]; transaminase activity [GO:0008483]
J9VLL9	WT:uggt	TRUE	0.1	0.113573	24.1741	24.7882	0.614031	0	1.53053	CNAG_05077		Glycosyl hydrolase	carbohydrate metabolic process [GO:0005975]		hydrolase activity, hydrolyzing O-glycosyl compounds [GO:0004553]
J9W1T4	WT:uggt	TRUE	1	0.961034	14.1018	14.332	0.230177	0	1.17298	CNAG_01864		Nudix hydrolase domain-containing protein		membrane [GO:0016020]	coenzyme A diphosphatase activity [GO:0010945]
J9VFP6	WT:uggt	TRUE	1	0.690485	16.0019	14.2879	-1.71396	0	0.304821	CNAG_00753		Uncharacterized protein
J9VPA5	WT:uggt	TRUE	0.1	0.296188	24.5738	19.8119	-4.76191	0	0.0368572	CNAG_04021		Large subunit ribosomal protein L24	cytoplasmic translation [GO:0002181]; ribosomal large subunit biogenesis [GO:0042273]	cytosolic large ribosomal subunit [GO:0022625]	RNA binding [GO:0003723]; structural constituent of ribosome [GO:0003735]
J9VIQ2	WT:uggt	TRUE	0.1	0.0837839	24.956	15.4143	-9.54162	0	0.0013418	CNAG_07567		DNA-directed RNA polymerase I subunit RPA34
J9VVH6	WT:uggt	TRUE	0.7	0.843086	21.9405	22.2395	0.298984	0	1.23028	CNAG_06034		Allantoin permease		plasma membrane [GO:0005886]	nucleobase transmembrane transporter activity [GO:0015205]
J9VW86	WT:uggt	TRUE	0.7	0.394316	21.5247	17.8652	-3.65948	0	0.0791382	CNAG_06512		Pirin
J9VUU6	WT:uggt	TRUE	1	0.904172	23.7007	23.6719	-0.0288772	0	0.980183	CNAG_06009		Cyclohydrolase	riboflavin biosynthetic process [GO:0009231]		GTP binding [GO:0005525]; GTP cyclohydrolase II activity [GO:0003935]
J9W163	WT:uggt	TRUE	0.4	0.238932	17.4792	21.244	3.76479	0	13.593	CNAG_01610		Pep3/Vps18/deep orange beta-propeller domain-containing protein	endosome organization [GO:0007032]; intracellular protein transport [GO:0006886]; organelle fusion [GO:0048284]; vesicle docking involved in exocytosis [GO:0006904]	endosome [GO:0005768]; HOPS complex [GO:0030897]	metal ion binding [GO:0046872]; protein-macromolecule adaptor activity [GO:0030674]
H1AE12	WT:uggt	TRUE	0.2	0.110471	23.1738	22.6203	-0.553495	0	0.681368	CNAG_00623	EGC1	Glucosylceramidase (EC 3.2.1.45) (Endoglycoceramidase-related protein 1) (EGCrP1) (Glucocerebrosidase)	cellular metabolic compound salvage [GO:0043094]; glucosylceramide catabolic process [GO:0006680]	membrane [GO:0016020]	beta-glucosidase activity [GO:0008422]; glucosylceramidase activity [GO:0004348]
J9VM79	WT:uggt	TRUE	0.2	0.107609	15.6715	12.8753	-2.79623	0	0.143963	CNAG_02988		Acetyltransferase	spermidine acetylation [GO:0032918]	cytoplasm [GO:0005737]	diamine N-acetyltransferase activity [GO:0004145]; spermidine binding [GO:0019809]
J9VNR3	WT:uggt	TRUE	0.1	0.160963	23.6834	24.3661	0.682683	0	1.60512	CNAG_04984		Pleiotropic drug resistance protein			phosphatidylinositol transfer activity [GO:0008526]
J9VQG3	WT:uggt	TRUE	1	0.454072	24.4187	20.7954	-3.62329	0	0.0811485	CNAG_03262		Inositol-1-monophosphatase (EC 3.1.3.25)	inositol biosynthetic process [GO:0006021]; phosphatidylinositol phosphate biosynthetic process [GO:0046854]; signal transduction [GO:0007165]		inositol monophosphate 1-phosphatase activity [GO:0008934]; inositol monophosphate 3-phosphatase activity [GO:0052832]; inositol monophosphate 4-phosphatase activity [GO:0052833]; metal ion binding [GO:0046872]
J9VVK3	WT:uggt	TRUE	0.1	0.0729274	24.3077	24.8487	0.541003	0	1.45498	CNAG_02074		Alpha-MPP (Inactive zinc metalloprotease alpha)	protein processing involved in protein targeting to mitochondrion [GO:0006627]	mitochondrion [GO:0005739]	metal ion binding [GO:0046872]; metalloendopeptidase activity [GO:0004222]
J9VKT1	WT:uggt	TRUE	0.4	0.190341	22.863	22.2483	-0.614704	0	0.653064	CNAG_02655		Isomerase YbhE			6-phosphogluconolactonase activity [GO:0017057]
J9VTV9	WT:uggt	TRUE	0.7	0.216418	24.5733	26.3597	1.78645	0	3.44964	CNAG_04119		Rho guanyl-nucleotide exchange factor	intracellular signal transduction [GO:0035556]		guanyl-nucleotide exchange factor activity [GO:0005085]
J9W260	WT:uggt	TRUE	0.1	0.0444542	22.2063	23.0592	0.852946	0	1.80619	CNAG_02009		Extensin
J9VTW7	WT:uggt	TRUE	0.2	0.237335	22.9109	22.1157	-0.795189	0	0.576268	CNAG_00977		VHS domain-containing protein	Golgi to endosome transport [GO:0006895]; Golgi to vacuole transport [GO:0006896]; protein transport to vacuole involved in ubiquitin-dependent protein catabolic process via the multivesicular body sorting pathway [GO:0043328]	cytosol [GO:0005829]; trans-Golgi network [GO:0005802]	phosphatidylinositol binding [GO:0035091]; ubiquitin binding [GO:0043130]
J9VQ93	WT:uggt	TRUE	0.7	0.944865	20.1397	20.5812	0.441499	0	1.35801	CNAG_03423		Transcription factor BYE1	DNA-templated transcription [GO:0006351]	Set1C/COMPASS complex [GO:0048188]	metal ion binding [GO:0046872]
J9VE45	WT:uggt	TRUE	0.7	0.140418	15.4453	21.9418	6.49656	0	90.294	CNAG_00445		HMG box domain-containing protein	regulation of transcription by RNA polymerase II [GO:0006357]	nucleus [GO:0005634]	DNA binding, bending [GO:0008301]
J9VSG1	WT:uggt	TRUE	0.7	0.573658	14.5991	17.1546	2.55551	0	5.87876	CNAG_02283		glucan 1,4-alpha-glucosidase (EC 3.2.1.3) (1,4-alpha-D-glucan glucohydrolase) (Glucan 1,4-alpha-glucosidase)	polysaccharide metabolic process [GO:0005976]	fungal-type vacuole [GO:0000324]; membrane [GO:0016020]	glucan 1,4-alpha-glucosidase activity [GO:0004339]
J9VPV7	WT:uggt	TRUE	0.7	0.825763	23.2597	23.3626	0.102915	0	1.07394	CNAG_02407		Phospholipase (EC 3.1.4.4)	intracellular signal transduction [GO:0035556]; phosphatidic acid biosynthetic process [GO:0006654]; phospholipid catabolic process [GO:0009395]	intracellular membrane-bounded organelle [GO:0043231]	N-acylphosphatidylethanolamine-specific phospholipase D activity [GO:0070290]; phospholipase D activity [GO:0004630]
J9VSW8	WT:uggt	TRUE	0.4	0.148645	17.7153	24.5093	6.79401	0	110.969	CNAG_04681		Mid2 domain-containing protein		membrane [GO:0016020]
J9VKU8	WT:uggt	TRUE	0.1	0.126829	25.8915	25.1312	-0.760311	0	0.590369	CNAG_01050		Hexosyltransferase (EC 2.4.1.-)	glycosaminoglycan biosynthetic process [GO:0006024]; protein glycosylation [GO:0006486]	Golgi membrane [GO:0000139]	UDP-galactosyltransferase activity [GO:0035250]
J9VXF5	WT:uggt	TRUE	0.7	0.23167	23.5926	25.4047	1.81209	0	3.51151	CNAG_05486		Importin N-terminal domain-containing protein	protein import into nucleus [GO:0006606]	cytosol [GO:0005829]; nuclear envelope [GO:0005635]	small GTPase binding [GO:0031267]
J9VE67	WT:uggt	TRUE	0.1	0.125741	12.2057	11.4845	-0.721249	0	0.606572	CNAG_00187		Ubiquitin carboxyl-terminal hydrolase 1		cytosol [GO:0005829]; nucleus [GO:0005634]	cysteine-type deubiquitinase activity [GO:0004843]
J9VN22	WT:uggt	TRUE	0.1	0.0715855	27.5324	25.1394	-2.39298	0	0.190389	CNAG_02710		T-complex protein 1 subunit gamma		chaperonin-containing T-complex [GO:0005832]	ATP binding [GO:0005524]; ATP hydrolysis activity [GO:0016887]; ATP-dependent protein folding chaperone [GO:0140662]; unfolded protein binding [GO:0051082]
J9VLL6	WT:uggt	TRUE	0.4	0.327409	21.6624	18.1501	-3.51236	0	0.0876345	CNAG_00448		V-type proton ATPase subunit	vacuolar acidification [GO:0007035]; vacuolar transport [GO:0007034]	early endosome [GO:0005769]; fungal-type vacuole membrane [GO:0000329]; plasma membrane proton-transporting V-type ATPase complex [GO:0033181]; proton-transporting V-type ATPase, V0 domain [GO:0033179]; vacuolar proton-transporting V-type ATPase complex [GO:0016471]	proton-transporting ATPase activity, rotational mechanism [GO:0046961]
J9VW10	WT:uggt	TRUE	0.1	0.106637	22.8137	22.2208	-0.592927	0	0.662996	CNAG_06190		N-acetylglucosamine-6-phosphate deacetylase (EC 3.5.1.25)	N-acetylglucosamine catabolic process [GO:0006046]		metal ion binding [GO:0046872]; N-acetylgalactosamine-6-phosphate deacetylase activity [GO:0047419]; N-acetylglucosamine-6-phosphate deacetylase activity [GO:0008448]
J9VS94	WT:uggt	TRUE	0.4	0.49249	18.5621	14.921	-3.64114	0	0.0801509	CNAG_04402		Splicing factor U2AF 35 kDa subunit	mRNA splicing, via spliceosome [GO:0000398]	spliceosomal complex [GO:0005681]; U2AF complex [GO:0089701]	metal ion binding [GO:0046872]; pre-mRNA 3'-splice site binding [GO:0030628]
J9VTE3	WT:uggt	TRUE	0.7	0.163464	24.6242	23.5694	-1.05474	0	0.481384	CNAG_01170		Small subunit ribosomal protein S17	translation [GO:0006412]	ribonucleoprotein complex [GO:1990904]; ribosome [GO:0005840]	structural constituent of ribosome [GO:0003735]
J9VHH7	WT:uggt	TRUE	0.7	0.279008	11.8637	11.3472	-0.516537	0	0.699048	CNAG_00706		RNA-binding protein rnp24	nuclear mRNA surveillance [GO:0071028]; poly(A)+ mRNA export from nucleus [GO:0016973]	cytoplasm [GO:0005737]; nucleus [GO:0005634]; ribonucleoprotein complex [GO:1990904]	mRNA binding [GO:0003729]
J9VPU9	WT:uggt	TRUE	0.1	0.0568791	27.3444	26.3928	-0.951572	0	0.517069	CNAG_02418		asparagine--tRNA ligase (EC 6.1.1.22) (Asparaginyl-tRNA synthetase)	asparaginyl-tRNA aminoacylation [GO:0006421]	cytoplasm [GO:0005737]	asparagine-tRNA ligase activity [GO:0004816]; ATP binding [GO:0005524]; nucleic acid binding [GO:0003676]
J9W2C8	WT:uggt	TRUE	0.4	0.783394	16.5741	17.8662	1.29209	0	2.44883	CNAG_06052		Galactose-1-phosphate uridylyltransferase (EC 2.7.7.12)	galactose catabolic process via UDP-galactose [GO:0033499]	cytoplasm [GO:0005737]	UDP-glucose:hexose-1-phosphate uridylyltransferase activity [GO:0008108]; zinc ion binding [GO:0008270]
J9VYM4	WT:uggt	TRUE	0.7	0.217208	21.4611	22.359	0.897918	0	1.86337	CNAG_01549		Splicing factor 3A subunit 3	mRNA splicing, via spliceosome [GO:0000398]	spliceosomal complex [GO:0005681]	RNA binding [GO:0003723]; zinc ion binding [GO:0008270]
J9VU38	WT:uggt	TRUE	0.7	0.829361	26.6357	26.4634	-0.172332	0	0.887407	CNAG_01745		Glycerol-3-phosphate dehydrogenase [NAD(+)] (EC 1.1.1.8)	carbohydrate metabolic process [GO:0005975]; glycerol-3-phosphate catabolic process [GO:0046168]; NADH oxidation [GO:0006116]	cytosol [GO:0005829]; glycerol-3-phosphate dehydrogenase (FAD) complex [GO:0009331]; nucleus [GO:0005634]	glycerol-3-phosphate dehydrogenase (NAD+) activity [GO:0141152]; NAD binding [GO:0051287]; protein homodimerization activity [GO:0042803]
J9VHS0	WT:uggt	TRUE	0.1	0.101982	26.215	23.5474	-2.66759	0	0.157389	CNAG_02722		Aldose reductase		cytosol [GO:0005829]	aldose reductase (NADPH) activity [GO:0004032]; oxidoreductase activity, acting on NAD(P)H, NAD(P) as acceptor [GO:0016652]
J9VJU3	WT:uggt	TRUE	0.7	0.239492	22.6581	20.785	-1.87305	0	0.272996	CNAG_05233	SMG7	Protein SMG7	nuclear-transcribed mRNA catabolic process, nonsense-mediated decay [GO:0000184]	telomerase holoenzyme complex [GO:0005697]	telomerase RNA binding [GO:0070034]; telomeric DNA binding [GO:0042162]
J9VE60	WT:uggt	TRUE	0.1	0.109851	23.0587	19.2808	-3.77788	0	0.0729029	CNAG_00182	VPS29	Vacuolar protein sorting-associated protein 29	intracellular protein transport [GO:0006886]; retrograde transport, endosome to Golgi [GO:0042147]	cytosol [GO:0005829]; endosome [GO:0005768]; retromer complex [GO:0030904]
J9W389	WT:uggt	TRUE	0.2	0.0681488	21.915	22.7689	0.853936	0	1.80743	CNAG_06412		rRNA-processing protein EFG1 (rRNA-processing protein efg1)	maturation of SSU-rRNA from tricistronic rRNA transcript (SSU-rRNA, 5.8S rRNA, LSU-rRNA) [GO:0000462]	nucleolus [GO:0005730]; preribosome, small subunit precursor [GO:0030688]
J9VNC9	WT:uggt	TRUE	0.7	0.123332	11.1459	18.8021	7.65618	0	201.716	CNAG_02051		Kinesin family member 20/23	microtubule-based movement [GO:0007018]	kinesin complex [GO:0005871]; microtubule [GO:0005874]; nucleus [GO:0005634]	ATP binding [GO:0005524]; ATP hydrolysis activity [GO:0016887]; microtubule binding [GO:0008017]; microtubule motor activity [GO:0003777]
T2BNM6	WT:uggt	TRUE	0.7	0.471159	23.9901	20.3438	-3.64624	0	0.0798677	CNAG_06074		Cytoplasmic protein, variant			oxidoreductase activity, acting on the CH-OH group of donors, NAD or NADP as acceptor [GO:0016616]
J9VTP5	WT:uggt	TRUE	0.1	0.05322	27.0555	26.1713	-0.884245	0	0.541771	CNAG_03567		non-specific serine/threonine protein kinase (EC 2.7.11.1)	intracellular signal transduction [GO:0035556]		ATP binding [GO:0005524]; protein serine/threonine kinase activity [GO:0004674]
J9VR03	WT:uggt	TRUE	0.1	0.217362	26.5226	25.0444	-1.47826	0	0.358922	CNAG_01112		Xenobiotic reductase			FMN binding [GO:0010181]; oxidoreductase activity [GO:0016491]
J9VSG3	WT:uggt	TRUE	0.2	0.116553	17.4764	11.6135	-5.8629	0	0.0171827	CNAG_03126		Protein PBN1	GPI anchor biosynthetic process [GO:0006506]	endoplasmic reticulum membrane [GO:0005789]
J9VU55	WT:uggt	TRUE	0.7	0.67359	10.7912	11.0959	0.304666	0	1.23513	CNAG_01763		Cytoplasmic protein	glutathione metabolic process [GO:0006749]	cytosol [GO:0005829]	5-oxoprolinase (ATP-hydrolyzing) activity [GO:0017168]
J9VQF2	WT:uggt	TRUE	1	0.386445	24.2505	19.7884	-4.46209	0	0.0453709	CNAG_02787		Dephospho-CoA kinase	coenzyme A biosynthetic process [GO:0015937]	membrane [GO:0016020]	ATP binding [GO:0005524]; dephospho-CoA kinase activity [GO:0004140]
J9VW42	WT:uggt	TRUE	0.7	0.616452	23.4147	23.0509	-0.363766	0	0.777133	CNAG_06230		Sugar phosphate transporter domain-containing protein		Golgi apparatus [GO:0005794]; membrane [GO:0016020]	antiporter activity [GO:0015297]
J9VH14	WT:uggt	TRUE	0.7	0.393536	23.8651	19.4252	-4.43988	0	0.0460746	CNAG_02990		Nuclear protein			zinc ion binding [GO:0008270]
J9VYY5	WT:uggt	TRUE	0.4	0.313201	11.3528	15.1776	3.82477	0	14.17	CNAG_06428		Ubiquitin thioesterase OTU (EC 3.4.19.12)	endoplasmic reticulum unfolded protein response [GO:0030968]	cytosol [GO:0005829]; nucleus [GO:0005634]	cysteine-type deubiquitinase activity [GO:0004843]
J9VXD2	WT:uggt	TRUE	0.4	0.223326	22.084	21.7449	-0.339149	0	0.790507	CNAG_05458		Endo-1,3(4)-beta-glucanase	glucan catabolic process [GO:0009251]		hydrolase activity, hydrolyzing O-glycosyl compounds [GO:0004553]
J9VKZ1	WT:uggt	TRUE	0.1	0.0820561	13.68	20.5475	6.86749	0	116.767	CNAG_06946		GAMM1 protein		cytoplasm [GO:0005737]; nucleus [GO:0005634]
J9VUA1	WT:uggt	TRUE	1	0.376896	15.2983	11.4165	-3.8818	0	0.0678361	CNAG_01638		Mitotic spindle assembly checkpoint protein MAD2	mitotic spindle assembly checkpoint signaling [GO:0007094]	cytoplasm [GO:0005737]; kinetochore [GO:0000776]; nucleoplasm [GO:0005654]
J9VL09	WT:uggt	TRUE	0.7	0.949192	14.6379	14.9449	0.307004	0	1.23714	CNAG_02567		Metaxin glutathione S-transferase domain-containing protein	mitochondrion organization [GO:0007005]; protein targeting to mitochondrion [GO:0006626]	SAM complex [GO:0001401]
J9VYF2	WT:uggt	TRUE	0.7	0.127032	24.2238	16.1383	-8.0855	0	0.00368149	CNAG_01472		Endoplasmic reticulum protein		membrane [GO:0016020]	monoatomic anion transmembrane transporter activity [GO:0008509]; sulfate transmembrane transporter activity [GO:0015116]
J9VI50	WT:uggt	TRUE	0.7	0.619224	28.0996	28.2367	0.137097	0	1.09969	CNAG_00147		Pre-mRNA-processing-splicing factor 8	spliceosomal tri-snRNP complex assembly [GO:0000244]	catalytic step 2 spliceosome [GO:0071013]; U5 snRNP [GO:0005682]	metallopeptidase activity [GO:0008237]; pre-mRNA intronic binding [GO:0097157]; U1 snRNA binding [GO:0030619]; U2 snRNA binding [GO:0030620]; U5 snRNA binding [GO:0030623]; U6 snRNA binding [GO:0017070]
J9VM51	WT:uggt	TRUE	0.1	0.26602	25.1428	19.4866	-5.65629	0	0.0198283	CNAG_05246		ADF-H domain-containing protein	actin filament debranching [GO:0071846]; negative regulation of Arp2/3 complex-mediated actin nucleation [GO:0034316]	actin cortical patch [GO:0030479]; nucleus [GO:0005634]	actin binding [GO:0003779]; Arp2/3 complex binding [GO:0071933]
J9VYP4	WT:uggt	TRUE	0.4	0.227137	22.8594	23.434	0.574627	0	1.48929	CNAG_01569		Mitochondrial import inner membrane translocase subunit Tim21	protein import into mitochondrial matrix [GO:0030150]	TIM23 mitochondrial import inner membrane translocase complex [GO:0005744]
J9VVR1	WT:uggt	TRUE	0.4	0.340983	28.2808	27.824	-0.456823	0	0.728589	CNAG_04738		Fimbrin	actin filament bundle assembly [GO:0051017]; actin filament network formation [GO:0051639]	actin filament [GO:0005884]; actin filament bundle [GO:0032432]; cytoplasm [GO:0005737]	actin filament binding [GO:0051015]; calcium ion binding [GO:0005509]
J9VQP6	WT:uggt	TRUE	0.7	0.538171	26.1691	25.9608	-0.208296	0	0.865559	CNAG_02672		60S ribosomal export protein NMD3	protein transport [GO:0015031]; ribosomal large subunit export from nucleus [GO:0000055]	cytoplasm [GO:0005737]; nucleus [GO:0005634]	ribosomal large subunit binding [GO:0043023]
J9VNQ4	WT:uggt	TRUE	1	0.846097	11.3524	11.2614	-0.0909454	0	0.938907	CNAG_01095		BEM46 family protein		membrane [GO:0016020]	palmitoyl-(protein) hydrolase activity [GO:0008474]
J9VKT2	WT:uggt	TRUE	1	0.606043	18.2171	15.0556	-3.16149	0	0.111763	CNAG_00153		CCHC-type domain-containing protein		catalytic step 2 spliceosome [GO:0071013]	RNA binding [GO:0003723]; zinc ion binding [GO:0008270]
J9VPE0	WT:uggt	TRUE	0.1	0.0820335	24.2201	23.0955	-1.12458	0	0.458636	CNAG_03127		Small subunit ribosomal protein S23	translation [GO:0006412]	cytosolic small ribosomal subunit [GO:0022627]	structural constituent of ribosome [GO:0003735]
J9VGB7	WT:uggt	TRUE	0.1	0.0818413	23.108	22.8893	-0.218656	0	0.859366	CNAG_03683		Short-chain dehydrogenase/reductase SDR			oxidoreductase activity [GO:0016491]
J9VFE3	WT:uggt	TRUE	0.4	0.299329	22.2006	20.9645	-1.23606	0	0.424532	CNAG_06732		Autophagy-related protein 2	autophagosome assembly [GO:0000045]; lipid transport [GO:0006869]; piecemeal microautophagy of the nucleus [GO:0034727]; reticulophagy [GO:0061709]	endoplasmic reticulum membrane [GO:0005789]; phagophore assembly site membrane [GO:0034045]	phosphatidylinositol-3-phosphate binding [GO:0032266]
J9VT23	WT:uggt	TRUE	0.7	0.391407	21.8849	22.0997	0.214715	0	1.16048	CNAG_03336		Zn(2)-C6 fungal-type domain-containing protein	DNA-templated transcription [GO:0006351]; positive regulation of transcription by RNA polymerase II [GO:0045944]	nucleus [GO:0005634]	DNA-binding transcription factor activity, RNA polymerase II-specific [GO:0000981]; sequence-specific DNA binding [GO:0043565]; zinc ion binding [GO:0008270]
J9VTX0	WT:uggt	TRUE	0.4	0.320773	22.0984	18.4345	-3.66399	0	0.0788913	CNAG_05731	GOX3	Glyoxal oxidase
J9VS21	WT:uggt	TRUE	0.1	0.0866467	23.092	14.6004	-8.49159	0	0.00277829	CNAG_05240		Signal recognition particle subunit SRP68 (SRP68)	SRP-dependent cotranslational protein targeting to membrane [GO:0006614]	nucleolus [GO:0005730]; signal recognition particle, endoplasmic reticulum targeting [GO:0005786]	7S RNA binding [GO:0008312]; endoplasmic reticulum signal peptide binding [GO:0030942]; signal recognition particle binding [GO:0005047]
J9VIG4	WT:uggt	TRUE	1	0.425371	11.7275	14.518	2.79053	0	6.91882	CNAG_04977		Pre-mRNA branch site protein p14	positive regulation of mRNA splicing, via spliceosome [GO:0048026]	spliceosomal complex [GO:0005681]	RNA binding [GO:0003723]
J9VSL2	WT:uggt	TRUE	0.7	0.541217	23.4275	23.4969	0.0694112	0	1.04929	CNAG_02211		Uncharacterized protein		cytoplasm [GO:0005737]
J9VXI8	WT:uggt	TRUE	0.7	0.982119	23.5157	23.4997	-0.0159973	0	0.988973	CNAG_03168		Sulfite reductase (NADPH) flavoprotein alpha-component		cytosol [GO:0005829]	flavin adenine dinucleotide binding [GO:0050660]; FMN binding [GO:0010181]; sulfite reductase (NADPH) activity [GO:0004783]
J9W0L4	WT:uggt	TRUE	0.2	0.142034	24.8803	24.4598	-0.420488	0	0.747172	CNAG_04625		Cerevisin	proteolysis [GO:0006508]	extracellular space [GO:0005615]	serine-type endopeptidase activity [GO:0004252]
J9W0F9	WT:uggt	TRUE	0.1	0.0849024	24.4759	22.4097	-2.06626	0	0.238778	CNAG_06196		Synaptosomal-associated protein, 23kDa	exocytosis [GO:0006887]	plasma membrane [GO:0005886]; SNARE complex [GO:0031201]	SNAP receptor activity [GO:0005484]; syntaxin binding [GO:0019905]
J9VQ24	WT:uggt	TRUE	0.7	0.486712	25.9454	26.8685	0.923027	0	1.89609	CNAG_01428		Eukaryotic translation initiation factor 5A (eIF-5A)	positive regulation of translational elongation [GO:0045901]; positive regulation of translational termination [GO:0045905]		ribosome binding [GO:0043022]; RNA binding [GO:0003723]; translation elongation factor activity [GO:0003746]; translation initiation factor activity [GO:0003743]
J9VW36	WT:uggt	TRUE	0.2	0.199352	25.8083	25.9899	0.181579	0	1.13412	CNAG_04584		Poly(RC)-binding protein 2/3/4			RNA binding [GO:0003723]
J9VF30	WT:uggt	TRUE	1	0.911766	21.1093	21.147	0.0377798	0	1.02653	CNAG_00562		BTB domain-containing protein
J9W4C6	WT:uggt	TRUE	0.1	0.0825407	18.5442	10.5745	-7.96975	0	0.00398902	CNAG_09003		Small ribosomal subunit protein uS3m	translation [GO:0006412]	mitochondrion [GO:0005739]; ribonucleoprotein complex [GO:1990904]; ribosome [GO:0005840]	structural constituent of ribosome [GO:0003735]
J9VTE1	WT:uggt	TRUE	1	0.433607	14.0743	11.2128	-2.86151	0	0.137594	CNAG_04700		Pentatricopeptide repeat protein
J9VXJ8	WT:uggt	TRUE	0.7	0.446987	21.7881	21.1009	-0.687201	0	0.621058	CNAG_03178		Uncharacterized protein		membrane [GO:0016020]
J9VKY7	WT:uggt	TRUE	0.7	0.161062	15.3519	23.3722	8.02035	0	259.636	CNAG_07329		C2H2-type domain-containing protein		nucleus [GO:0005634]	metal ion binding [GO:0046872]
J9VNZ7	WT:uggt	TRUE	0.1	0.0806508	10.679	11.5095	0.830583	0	1.7784	CNAG_00986	UBA4	Adenylyltransferase and sulfurtransferase	protein urmylation [GO:0032447]; tRNA wobble position uridine thiolation [GO:0002143]	cytosol [GO:0005829]	adenylyltransferase activity [GO:0070566]; ATP binding [GO:0005524]; metal ion binding [GO:0046872]; sulfotransferase activity [GO:0008146]; thiosulfate sulfurtransferase activity [GO:0004792]; URM1 activating enzyme activity [GO:0042292]
J9VVH4	WT:uggt	TRUE	0.7	0.324756	29.4427	28.4592	-0.9835	0	0.505751	CNAG_02099		Fatty acid synthase subunit beta, fungi type	long-chain fatty acid biosynthetic process [GO:0042759]	fatty acid synthase complex [GO:0005835]	(3R)-3-hydroxypalmitoyl-[acyl-carrier-protein] dehydratase activity [GO:0004317]; [acyl-carrier-protein] S-acetyltransferase activity [GO:0004313]; [acyl-carrier-protein] S-malonyltransferase activity [GO:0004314]; enoyl-[acyl-carrier-protein] reductase (NADH) activity [GO:0004318]; fatty acid synthase activity [GO:0004312]; fatty acyl-[ACP] hydrolase activity [GO:0016297]; holo-[acyl-carrier-pro…
J9VY24	WT:uggt	TRUE	1	0.568444	18.1678	15.229	-2.93872	0	0.130424	CNAG_03388		Nuclear protein	regulation of transcription by RNA polymerase II [GO:0006357]	Rpd3S complex [GO:0032221]	metal ion binding [GO:0046872]
J9W3B6	WT:uggt	TRUE	0.4	0.523592	22.9251	23.0771	0.15203	0	1.11113	CNAG_06441		isoleucine--tRNA ligase (EC 6.1.1.5) (Isoleucyl-tRNA synthetase)	isoleucyl-tRNA aminoacylation [GO:0006428]; mitochondrial translation [GO:0032543]	cytosol [GO:0005829]; mitochondrion [GO:0005739]	aminoacyl-tRNA editing activity [GO:0002161]; ATP binding [GO:0005524]; isoleucine-tRNA ligase activity [GO:0004822]; tRNA binding [GO:0000049]
J9VK75	WT:uggt	TRUE	0.2	0.150335	22.3693	14.5689	-7.80044	0	0.00448573	CNAG_02851		Threonine aldolase	glycine biosynthetic process [GO:0006545]; threonine catabolic process [GO:0006567]	cytosol [GO:0005829]	L-allo-threonine aldolase activity [GO:0008732]
J9VQ35	WT:uggt	TRUE	0.1	0.0725264	20.5774	14.0684	-6.50905	0	0.0109794	CNAG_02316		RNase III domain-containing protein	mitochondrial translation [GO:0032543]; RNA processing [GO:0006396]	mitochondrial large ribosomal subunit [GO:0005762]	ribonuclease III activity [GO:0004525]; structural constituent of ribosome [GO:0003735]
J9VVA3	WT:uggt	TRUE	0.1	0.268376	22.6287	18.1959	-4.43283	0	0.0463006	CNAG_03303		40S ribosomal protein S27	ribosomal small subunit assembly [GO:0000028]; translation [GO:0006412]	cytosolic small ribosomal subunit [GO:0022627]	metal ion binding [GO:0046872]; RNA binding [GO:0003723]; structural constituent of ribosome [GO:0003735]
J9VJU9	WT:uggt	TRUE	0.1	0.119951	25.5317	24.1061	-1.4256	0	0.372266	CNAG_01400		Phospho-2-dehydro-3-deoxyheptonate aldolase (EC 2.5.1.54)	amino acid biosynthetic process [GO:0008652]; aromatic amino acid family biosynthetic process [GO:0009073]	cytoplasm [GO:0005737]	3-deoxy-7-phosphoheptulonate synthase activity [GO:0003849]
J9W0C9	WT:uggt	TRUE	0.4	0.379811	11.1633	11.6593	0.495912	0	1.41021	CNAG_04729		ATP-dependent RNA helicase (EC 3.6.4.13)	rRNA processing [GO:0006364]	nucleolus [GO:0005730]	ATP binding [GO:0005524]; ATP hydrolysis activity [GO:0016887]; RNA binding [GO:0003723]; RNA helicase activity [GO:0003724]
J9VYY7	WT:uggt	TRUE	0.1	0.0817873	22.3741	15.0668	-7.3073	0	0.00631369	CNAG_04188		O-methyltransferase	methylation [GO:0032259]		O-methyltransferase activity [GO:0008171]
J9VM87	WT:uggt	TRUE	0.4	0.293879	23.4918	22.999	-0.492731	0	0.710679	CNAG_05282		Phospholipid-transporting ATPase (EC 7.6.2.1)	endocytosis [GO:0006897]; phospholipid translocation [GO:0045332]; retrograde vesicle-mediated transport, Golgi to endoplasmic reticulum [GO:0006890]	endosome [GO:0005768]; plasma membrane [GO:0005886]; trans-Golgi network [GO:0005802]	ATP binding [GO:0005524]; ATP hydrolysis activity [GO:0016887]; magnesium ion binding [GO:0000287]; phosphatidylethanolamine flippase activity [GO:0090555]
J9VFG8	WT:uggt	TRUE	0.4	0.354924	18.0623	21.1631	3.1008	0	8.57892	CNAG_00708		Pre-mRNA-splicing factor SLT11	RNA splicing [GO:0008380]	Prp19 complex [GO:0000974]; U2-type catalytic step 1 spliceosome [GO:0071006]; U2-type catalytic step 2 spliceosome [GO:0071007]	metal ion binding [GO:0046872]; pre-mRNA binding [GO:0036002]; U6 snRNA binding [GO:0017070]
J9VRB3	WT:uggt	TRUE	0.4	0.360378	27.2702	25.6311	-1.63909	0	0.32106	CNAG_06631		Myosin heavy chain
J9VDV9	WT:uggt	TRUE	0.7	0.126964	11.8009	18.1222	6.32131	0	79.9656	CNAG_00086		tRNA (guanine(26)-N(2))-dimethyltransferase (EC 2.1.1.216)	tRNA N2-guanine methylation [GO:0002940]	nucleus [GO:0005634]	tRNA (guanine(10)-N2)-methyltransferase activity [GO:0160102]; tRNA binding [GO:0000049]
J9VHY8	WT:uggt	TRUE	0.1	0.141065	26.5821	19.2294	-7.35273	0	0.00611795	CNAG_00092		Mitochondrial pyruvate carrier	mitochondrial pyruvate transmembrane transport [GO:0006850]	mitochondrial inner membrane [GO:0005743]	pyruvate transmembrane transporter activity [GO:0050833]
J9VGH7	WT:uggt	TRUE	0.7	0.768308	21.6952	20.371	-1.32422	0	0.399365	CNAG_03987		Elongation factor 1 alpha-like protein		cytoplasm [GO:0005737]	GTP binding [GO:0005525]; GTPase activity [GO:0003924]; translation elongation factor activity [GO:0003746]
J9VRP5	WT:uggt	TRUE	0.7	0.147616	25.506	17.1533	-8.35276	0	0.00305893	CNAG_05761		Cyclin-dependent kinases regulatory subunit	cell division [GO:0051301]; regulation of mitotic cell cycle [GO:0007346]	cyclin-dependent protein kinase holoenzyme complex [GO:0000307]; SCF ubiquitin ligase complex [GO:0019005]	cyclin-dependent protein serine/threonine kinase activator activity [GO:0061575]; histone binding [GO:0042393]; kinase activity [GO:0016301]; protein kinase binding [GO:0019901]; ubiquitin binding [GO:0043130]
J9VT46	WT:uggt	TRUE	1	0.572501	19.2597	21.573	2.31334	0	4.97032	CNAG_04583		DDT domain-containing protein	subtelomeric heterochromatin formation [GO:0031509]	chromatin [GO:0000785]; chromosome, telomeric region [GO:0000781]; nucleus [GO:0005634]
J9VM67	WT:uggt	TRUE	0.7	0.63726	11.4119	11.746	0.334182	0	1.26066	CNAG_02261		Late embryogenesis abundant protein LEA-2 subgroup domain-containing protein		plasma membrane [GO:0005886]
J9VTH6	WT:uggt	TRUE	0.1	0.197972	21.302	16.5369	-4.76507	0	0.0367765	CNAG_03502		Magnesium transporter	intracellular magnesium ion homeostasis [GO:0010961]	fungal-type vacuole membrane [GO:0000329]	magnesium ion transmembrane transporter activity [GO:0015095]
J9VFU7	WT:uggt	TRUE	0.2	0.330891	18.8908	22.6263	3.73549	0	13.3197	CNAG_00089		Exosome complex component RRP4	CUT catabolic process [GO:0071034]; exonucleolytic trimming to generate mature 3'-end of 5.8S rRNA from tricistronic rRNA transcript (SSU-rRNA, 5.8S rRNA, LSU-rRNA) [GO:0000467]; nuclear polyadenylation-dependent rRNA catabolic process [GO:0071035]; poly(A)-dependent snoRNA 3'-end processing [GO:0071051]; TRAMP-dependent tRNA surveillance pathway [GO:0071038]; U4 snRNA 3'-end processing [GO:00344…	cytoplasmic exosome (RNase complex) [GO:0000177]; nuclear exosome (RNase complex) [GO:0000176]	RNA binding [GO:0003723]
J9VIJ8	WT:uggt	TRUE	0.2	0.115284	21.0744	14.0218	-7.0526	0	0.00753281	CNAG_02674		Thioredoxin	protein modification by small protein removal [GO:0070646]		peptidase activity [GO:0008233]
J9VMF7	WT:uggt	TRUE	0.1	0.00408636	26.7803	25.8382	-0.942126	0	0.520465	CNAG_07400		aspartate--tRNA ligase (EC 6.1.1.12)	aspartyl-tRNA aminoacylation [GO:0006422]	aminoacyl-tRNA synthetase multienzyme complex [GO:0017101]; cytosol [GO:0005829]	aspartate-tRNA ligase activity [GO:0004815]; ATP binding [GO:0005524]; RNA binding [GO:0003723]
J9VG64	WT:uggt	TRUE	1	0.474798	11.8838	15.096	3.21213	0	9.26717	CNAG_07320		Uncharacterized protein		nucleus [GO:0005634]	DNA-binding transcription activator activity, RNA polymerase II-specific [GO:0001228]; RNA polymerase II cis-regulatory region sequence-specific DNA binding [GO:0000978]
J9VSC3	WT:uggt	TRUE	0.1	0.147359	29.1368	26.8935	-2.2433	0	0.211202	CNAG_04443		Dienelactone hydrolase domain-containing protein			hydrolase activity [GO:0016787]
J9W0B7	WT:uggt	TRUE	0.4	0.839095	17.7243	18.7479	1.02362	0	2.03302	CNAG_04752		MARVEL domain-containing protein		membrane [GO:0016020]
J9VJV4	WT:uggt	TRUE	0.1	0.238659	26.7061	20.4882	-6.21788	0	0.0134348	CNAG_01395		Ribose-5-phosphate isomerase (EC 5.3.1.6) (D-ribose-5-phosphate ketol-isomerase) (Phosphoriboisomerase)	D-ribose metabolic process [GO:0006014]; pentose-phosphate shunt, non-oxidative branch [GO:0009052]	cytosol [GO:0005829]; intracellular membrane-bounded organelle [GO:0043231]	ribose-5-phosphate isomerase activity [GO:0004751]
J9VS76	WT:uggt	TRUE	1	0.585681	18.7982	15.6269	-3.17127	0	0.111007	CNAG_07688		UAS domain-containing protein		endoplasmic reticulum [GO:0005783]; membrane [GO:0016020]	ubiquitin binding [GO:0043130]
J9VN51	WT:uggt	TRUE	0.7	0.123856	23.0075	14.9513	-8.05612	0	0.00375721	CNAG_02136		Small subunit ribosomal protein S6	translation [GO:0006412]	cytosolic small ribosomal subunit [GO:0022627]; mitochondrial small ribosomal subunit [GO:0005763]	small ribosomal subunit rRNA binding [GO:0070181]; structural constituent of ribosome [GO:0003735]
J9VNN7	WT:uggt	TRUE	0.1	0.0147223	22.8383	23.5324	0.694154	0	1.61793	CNAG_04953	TSH1	Pali-domain-containing protein		cell division site [GO:0032153]; growing cell tip [GO:0035838]; plasma membrane [GO:0005886]
J9VQW4	WT:uggt	TRUE	0.7	0.58804	25.1885	25.0225	-0.166006	0	0.891307	CNAG_02597		Uncharacterized protein		nucleus [GO:0005634]	metal ion binding [GO:0046872]; RNA binding [GO:0003723]
J9VVZ8	WT:uggt	TRUE	0.2	0.107104	11.8107	18.2059	6.3952	0	84.1682	CNAG_07908		Aconitate hydratase, mitochondrial (Aconitase) (EC 4.2.1.-)	tricarboxylic acid cycle [GO:0006099]	cytosol [GO:0005829]; mitochondrion [GO:0005739]	4 iron, 4 sulfur cluster binding [GO:0051539]; aconitate hydratase activity [GO:0003994]; metal ion binding [GO:0046872]
J9VXU7	WT:uggt	TRUE	0.7	0.478766	22.9676	22.7154	-0.252214	0	0.839607	CNAG_04797		Signal recognition particle subunit SRP19	SRP-dependent cotranslational protein targeting to membrane, signal sequence recognition [GO:0006617]	signal recognition particle, endoplasmic reticulum targeting [GO:0005786]	7S RNA binding [GO:0008312]
J9VRH9	WT:uggt	TRUE	0.7	0.498731	23.4648	23.6351	0.170316	0	1.1253	CNAG_00906		Nucleolar pre-ribosomal-associated protein 1	maturation of 5.8S rRNA from tricistronic rRNA transcript (SSU-rRNA, 5.8S rRNA, LSU-rRNA) [GO:0000466]; maturation of LSU-rRNA from tricistronic rRNA transcript (SSU-rRNA, 5.8S rRNA, LSU-rRNA) [GO:0000463]	nucleolus [GO:0005730]
J9VW34	WT:uggt	TRUE	1	0.986773	19.7801	19.6781	-0.101978	0	0.931755	CNAG_06453		Benzodiazapine receptor		mitochondrial outer membrane [GO:0005741]
J9VJ14	WT:uggt	TRUE	0.1	0.129212	29.0343	25.2872	-3.74707	0	0.0744768	CNAG_00457		Glutamine synthetase (EC 6.3.1.2)	glutamine biosynthetic process [GO:0006542]	cytoplasm [GO:0005737]	ATP binding [GO:0005524]; glutamine synthetase activity [GO:0004356]
J9VKI6	WT:uggt	TRUE	0.4	0.133476	11.3921	19.7629	8.37079	0	331.024	CNAG_00073		Nuclear mRNA splicing protein		protein-containing complex [GO:0032991]	armadillo repeat domain binding [GO:0070016]; calmodulin binding [GO:0005516]; protein phosphatase 2A binding [GO:0051721]; protein-containing complex binding [GO:0044877]
T2BMM4	WT:uggt	TRUE	0.7	0.124927	21.1123	14.4206	-6.69177	0	0.00967333	CNAG_07986		Aminotransferase class I/classII domain-containing protein	aspartate catabolic process [GO:0006533]; L-phenylalanine biosynthetic process from chorismate via phenylpyruvate [GO:0033585]	cytosol [GO:0005829]; mitochondrion [GO:0005739]	identical protein binding [GO:0042802]; L-aspartate:2-oxoglutarate aminotransferase activity [GO:0004069]; L-tyrosine:2-oxoglutarate aminotransferase activity [GO:0004838]; pyridoxal phosphate binding [GO:0030170]
J9VI58	WT:uggt	TRUE	0.1	0.1053	25.4425	21.3196	-4.12294	0	0.0573948	CNAG_06723		Succinate dehydrogenase [ubiquinone] cytochrome b small subunit	mitochondrial electron transport, succinate to ubiquinone [GO:0006121]; protein insertion into mitochondrial inner membrane [GO:0045039]; tricarboxylic acid cycle [GO:0006099]	mitochondrial respiratory chain complex II, succinate dehydrogenase complex (ubiquinone) [GO:0005749]; TIM22 mitochondrial import inner membrane insertion complex [GO:0042721]	heme binding [GO:0020037]; protein transmembrane transporter activity [GO:0008320]; succinate dehydrogenase (quinone) activity [GO:0008177]; ubiquinone binding [GO:0048039]
J9VLQ7	WT:uggt	TRUE	0.1	0.0558325	22.6634	23.3394	0.67602	0	1.59773	CNAG_00499		Solute carrier family 25 (Mitochondrial carnitine/acylcarnitine transporter), member 20/29	carnitine transmembrane transport [GO:1902603]; mitochondrial transport [GO:0006839]	membrane [GO:0016020]; mitochondrial envelope [GO:0005740]	acyl carnitine transmembrane transporter activity [GO:0015227]
J9VDK2	WT:uggt	TRUE	0.1	0.315653	19.5849	23.9132	4.32832	0	20.0888	CNAG_07342		Cytoplasmic protein	positive regulation of mitochondrial translation [GO:0070131]	mitochondrion [GO:0005739]
J9VU93	WT:uggt	TRUE	0.7	0.483426	22.6396	19.7031	-2.93644	0	0.13063	CNAG_05865		Proteasome subunit beta	proteasome-mediated ubiquitin-dependent protein catabolic process [GO:0043161]	cytoplasm [GO:0005737]; nucleus [GO:0005634]; proteasome core complex [GO:0005839]
J9VGP9	WT:uggt	TRUE	1	0.439777	22.3056	18.8881	-3.41754	0	0.0935875	CNAG_03822		Tafazzin family protein	cardiolipin acyl-chain remodeling [GO:0035965]; inner mitochondrial membrane organization [GO:0007007]	mitochondrial inner membrane [GO:0005743]; mitochondrial outer membrane [GO:0005741]	1-acylglycerophosphocholine O-acyltransferase activity [GO:0047184]
J9VYA9	WT:uggt	TRUE	0.1	0.078719	20.6016	14.5022	-6.09935	0	0.0145852	CNAG_03490		RING-type domain-containing protein
J9VLS0	WT:uggt	TRUE	0.1	0.266711	24.0597	19.1774	-4.88235	0	0.0339052	CNAG_00921		Glutathione transferase			transferase activity [GO:0016740]
J9VEX4	WT:uggt	TRUE	0.2	0.166348	26.2922	25.3301	-0.962062	0	0.513323	CNAG_00497		Uncharacterized protein		cortical endoplasmic reticulum [GO:0032541]; plasma membrane [GO:0005886]	chloride channel activity [GO:0005254]
J9VJT5	WT:uggt	TRUE	0.7	0.263414	11.6595	11.3101	-0.349375	0	0.784924	CNAG_05223		RNA-polymerase II-associated protein 3-like C-terminal domain-containing protein	protein targeting to mitochondrion [GO:0006626]	cytosol [GO:0005829]; mitochondrion [GO:0005739]	heat shock protein binding [GO:0031072]
J9VYL1	WT:uggt	TRUE	0.2	0.133275	23.391	24.3889	0.997894	0	1.99708	CNAG_06277		Ribosomal RNA-processing protein 12
J9VQ16	WT:uggt	TRUE	0.4	0.137695	25.6989	24.675	-1.02391	0	0.491781	CNAG_03337		Uncharacterized protein		membrane [GO:0016020]
J9VKH7	WT:uggt	TRUE	1	0.854626	25.4193	25.4865	0.067217	0	1.04769	CNAG_00062		26S proteasome regulatory subunit N3	regulation of protein catabolic process [GO:0042176]; ubiquitin-dependent protein catabolic process [GO:0006511]	proteasome regulatory particle, lid subcomplex [GO:0008541]	enzyme regulator activity [GO:0030234]
J9VJ71	WT:uggt	TRUE	0.7	0.371186	28.3806	27.3031	-1.07741	0	0.473879	CNAG_05232		Large subunit ribosomal protein L8	cytoplasmic translation [GO:0002181]	cytosolic large ribosomal subunit [GO:0022625]	RNA binding [GO:0003723]; structural constituent of ribosome [GO:0003735]
J9VWV8	WT:uggt	TRUE	0.7	0.544564	11.2513	10.7979	-0.453464	0	0.730287	CNAG_06519		Autophagy protein 5	autophagosome assembly [GO:0000045]; cellular response to nitrogen starvation [GO:0006995]; nucleophagy [GO:0044804]	Atg12-Atg5-Atg16 complex [GO:0034274]; phagophore assembly site membrane [GO:0034045]	Atg8-family ligase activity [GO:0019776]
J9VKM8	WT:uggt	TRUE	0.2	0.288887	13.3182	17.8825	4.5643	0	23.6587	CNAG_02713		Uncharacterized protein
J9VT16	WT:uggt	TRUE	0.7	0.429779	23.8191	24.733	0.91389	0	1.88412	CNAG_03325		ChAPs family protein	Golgi to plasma membrane transport [GO:0006893]	exomer complex [GO:0034044]
J9VFV9	WT:uggt	TRUE	1	0.567719	18.6579	15.3598	-3.29807	0	0.101668	CNAG_00099		DNA replication licensing factor MCM3 (EC 3.6.4.12)	DNA strand elongation involved in DNA replication [GO:0006271]; double-strand break repair via break-induced replication [GO:0000727]; mitotic DNA replication initiation [GO:1902975]; premeiotic DNA replication [GO:0006279]	DNA replication preinitiation complex [GO:0031261]; MCM complex [GO:0042555]; nuclear pre-replicative complex [GO:0005656]; nuclear replication fork [GO:0043596]	ATP binding [GO:0005524]; ATP hydrolysis activity [GO:0016887]; single-stranded DNA binding [GO:0003697]; single-stranded DNA helicase activity [GO:0017116]
J9VU05	WT:uggt	TRUE	1	0.636212	24.4888	24.1698	-0.319059	0	0.801593	CNAG_01548		RNA helicase (EC 3.6.4.13)		catalytic step 2 spliceosome [GO:0071013]; nucleolus [GO:0005730]	ATP binding [GO:0005524]; hydrolase activity [GO:0016787]; mRNA binding [GO:0003729]; RNA helicase activity [GO:0003724]
J9VLJ3	WT:uggt	TRUE	0.4	0.321625	11.9732	11.3156	-0.657569	0	0.633946	CNAG_00422		Uncharacterized protein
J9VQ98	WT:uggt	TRUE	0.7	0.515594	26.7769	26.6719	-0.10505	0	0.929773	CNAG_03176		Endoplasmic oxidoreductin 1	protein folding in endoplasmic reticulum [GO:0034975]	endoplasmic reticulum membrane [GO:0005789]	FAD binding [GO:0071949]; protein-disulfide reductase activity [GO:0015035]; thiol oxidase activity [GO:0016972]
J9VMI9	WT:uggt	TRUE	0.4	0.248981	25.3814	24.2339	-1.14743	0	0.451429	CNAG_06813	CAP1	Glycosyl transferase CAP10 domain-containing protein
J9VKC4	WT:uggt	TRUE	0.7	0.381448	27.0882	27.601	0.51275	0	1.42677	CNAG_02817	SEC4/SAV1	GTP-binding protein ypt2	endocytic recycling [GO:0032456]; Golgi vesicle fusion to target membrane [GO:0048210]; protein localization to plasma membrane [GO:0072659]; protein secretion [GO:0009306]; regulation of exocytosis [GO:0017157]; vesicle docking involved in exocytosis [GO:0006904]	endosome [GO:0005768]; plasma membrane [GO:0005886]; trans-Golgi network transport vesicle [GO:0030140]	GTP binding [GO:0005525]; GTPase activity [GO:0003924]
J9VYV9	WT:uggt	TRUE	0.4	0.253897	11.823	11.0664	-0.756571	0	0.591901	CNAG_01644		BED-type domain-containing protein
T2BQJ6	WT:uggt	TRUE	0.1	0.0139129	22.9368	22.4797	-0.45712	0	0.728439	CNAG_06784		Fungal-type protein kinase domain-containing protein
O42773	WT:uggt	TRUE	0.2	0.142889	22.5481	23.5724	1.02425	0	2.03391	CNAG_04796	CNA1	Serine/threonine-protein phosphatase 2B catalytic subunit A1 (EC 3.1.3.16) (Calcineurin A1)	calcineurin-mediated signaling [GO:0097720]; cellular response to calcium ion [GO:0071277]; fungal-type cell wall organization [GO:0031505]; intracellular signal transduction [GO:0035556]; negative regulation of calcium ion import across plasma membrane [GO:1905949]; positive regulation of mitotic actomyosin contractile ring contraction [GO:1903473]; positive regulation of mitotic division septum…	calcineurin complex [GO:0005955]; mitotic actomyosin contractile ring, intermediate layer [GO:0120105]	calmodulin binding [GO:0005516]; calmodulin-dependent protein phosphatase activity [GO:0033192]; ferric iron binding [GO:0008199]; myosin phosphatase activity [GO:0017018]; zinc ion binding [GO:0008270]
J9VP08	WT:uggt	TRUE	0.1	0.0867857	21.6915	14.2505	-7.44104	0	0.00575472	CNAG_00976		Carbamoyl phosphate synthase arginine-specific small chain (EC 6.3.5.5) (Arginine-specific carbamoyl phosphate synthetase, glutamine chain)	'de novo' pyrimidine nucleobase biosynthetic process [GO:0006207]; arginine biosynthetic process [GO:0006526]; glutamine metabolic process [GO:0006541]	carbamoyl-phosphate synthase complex [GO:0005951]	ATP binding [GO:0005524]; carbamoyl-phosphate synthase (glutamine-hydrolyzing) activity [GO:0004088]
J9VMX3	WT:uggt	TRUE	0.7	0.169993	18.3197	11.8796	-6.44008	0	0.0115171	CNAG_06542		Conserved oligomeric Golgi complex subunit 7 (Component of oligomeric Golgi complex 7)	Golgi organization [GO:0007030]; intracellular protein transport [GO:0006886]; retrograde vesicle-mediated transport, Golgi to endoplasmic reticulum [GO:0006890]	Golgi membrane [GO:0000139]; Golgi transport complex [GO:0017119]
J9VNM6	WT:uggt	TRUE	0.2	0.31133	10.775	15.6313	4.85629	0	28.966	CNAG_01125		Uncharacterized protein
J9VNN8	WT:uggt	TRUE	1	0.379765	22.6746	21.1665	-1.50803	0	0.351591	CNAG_03809		Uncharacterized protein
J9VU91	WT:uggt	TRUE	0.7	0.786663	25.5067	25.2737	-0.233015	0	0.850855	CNAG_04224		Carboxy-terminal domain RNA polymerase II polypeptide A small phosphatase		plasma membrane [GO:0005886]	RNA polymerase II CTD heptapeptide repeat phosphatase activity [GO:0008420]
J9VNA2	WT:uggt	TRUE	0.4	0.125695	22.0359	23.186	1.15011	0	2.21931	CNAG_02076		Leukotriene A-4 hydrolase/aminopeptidase	peptide catabolic process [GO:0043171]; proteolysis [GO:0006508]	cytosol [GO:0005829]; nucleus [GO:0005634]	epoxide hydrolase activity [GO:0004301]; leukotriene-A4 hydrolase activity [GO:0004463]; metalloaminopeptidase activity [GO:0070006]; zinc ion binding [GO:0008270]
J9VKF7	WT:uggt	TRUE	0.1	0.0468523	23.798	24.1781	0.380057	0	1.30139	CNAG_02796		Phospho-2-dehydro-3-deoxyheptonate aldolase (EC 2.5.1.54)	amino acid biosynthetic process [GO:0008652]; aromatic amino acid family biosynthetic process [GO:0009073]; chorismate biosynthetic process [GO:0009423]		3-deoxy-7-phosphoheptulonate synthase activity [GO:0003849]
J9VEV6	WT:uggt	TRUE	0.7	0.133434	21.6773	15.1828	-6.49453	0	0.0110905	CNAG_00471		Cytochrome c oxidase assembly factor 3	mitochondrial cytochrome c oxidase assembly [GO:0033617]	mitochondrial inner membrane [GO:0005743]
J9VER4	WT:uggt	TRUE	0.7	0.388069	24.8923	24.5695	-0.3228	0	0.799517	CNAG_00410		RRM domain-containing protein			RNA binding [GO:0003723]
J9VVR0	WT:uggt	TRUE	0.1	0.307204	22.1014	17.6231	-4.47829	0	0.0448642	CNAG_03479		Uncharacterized protein
J9VGL2	WT:uggt	TRUE	0.1	0.283345	24.6512	19.1565	-5.49472	0	0.0221781	CNAG_00337		Uncharacterized protein
J9VVS8	WT:uggt	TRUE	1	0.763474	11.0564	11.2407	0.184379	0	1.13633	CNAG_04717		Uncharacterized protein
J9VFD0	WT:uggt	TRUE	1	0.936523	11.7711	11.7933	0.0221891	0	1.0155	CNAG_06748		U3 small nucleolar RNA-associated protein 7	maturation of SSU-rRNA from tricistronic rRNA transcript (SSU-rRNA, 5.8S rRNA, LSU-rRNA) [GO:0000462]	90S preribosome [GO:0030686]; nucleolus [GO:0005730]; small-subunit processome [GO:0032040]
J9VLR3	WT:uggt	TRUE	0.1	0.0847835	24.5665	15.2195	-9.34694	0	0.00153565	CNAG_00926		Alpha-1,3/1,6-mannosyltransferase ALG2 (EC 2.4.1.132) (EC 2.4.1.257) (GDP-Man:Man(1)GlcNAc(2)-PP-Dol alpha-1,3-mannosyltransferase)	oligosaccharide-lipid intermediate biosynthetic process [GO:0006490]; protein glycosylation [GO:0006486]	endoplasmic reticulum membrane [GO:0005789]	alpha-1,3-mannosyltransferase activity [GO:0000033]; GDP-Man:Man1GlcNAc2-PP-Dol alpha-1,3-mannosyltransferase activity [GO:0004378]; GDP-Man:Man2GlcNAc2-PP-dolichol alpha-1,6-mannosyltransferase activity [GO:0102704]
J9VNY5	WT:uggt	TRUE	1	0.730926	25.2268	24.8282	-0.398671	0	0.758556	CNAG_00996	PMT4	Dolichyl-phosphate-mannose--protein mannosyltransferase (EC 2.4.1.109)		endoplasmic reticulum membrane [GO:0005789]	dolichyl-phosphate-mannose-protein mannosyltransferase activity [GO:0004169]
J9VRB2	WT:uggt	TRUE	0.7	0.730328	26.6926	26.3928	-0.299799	0	0.812365	CNAG_04257		Uncharacterized protein	mitochondrial outer membrane translocase complex assembly [GO:0070096]; protein insertion into mitochondrial outer membrane [GO:0045040]	mitochondrial outer membrane [GO:0005741]
Q56R42	WT:uggt	TRUE	0.1	0.323609	26.2218	20.9876	-5.23418	0	0.0265678	CNAG_01523	HOG1	Mitogen-activated protein kinase HOG1 (MAP kinase HOG1) (EC 2.7.11.24)	cellular response to oxidative stress [GO:0034599]; osmosensory signaling pathway [GO:0007231]; stress-activated MAPK cascade [GO:0051403]	cytoplasm [GO:0005737]; nucleus [GO:0005634]	ATP binding [GO:0005524]; MAP kinase activity [GO:0004707]; protein serine kinase activity [GO:0106310]
J9VPW1	WT:uggt	TRUE	0.7	0.268501	22.1961	21.9966	-0.199424	0	0.870898	CNAG_02947		SCYL protein kinase			ATP binding [GO:0005524]; protein kinase activity [GO:0004672]
J9VQ47	WT:uggt	TRUE	0.2	0.0603529	25.0236	24.6385	-0.385038	0	0.765759	CNAG_03372		BRO domain-containing protein 1	protein transport to vacuole involved in ubiquitin-dependent protein catabolic process via the multivesicular body sorting pathway [GO:0043328]	endosome [GO:0005768]
J9VMX1	WT:uggt	TRUE	0.7	0.153255	15.0062	22.6599	7.65375	0	201.376	CNAG_06765		Uncharacterized protein		nucleus [GO:0005634]
J9VKB7	WT:uggt	TRUE	0.2	0.313027	20.3243	14.414	-5.91035	0	0.0166268	CNAG_01451		NADH-ubiquinone oxidoreductase 9.5 kDa subunit		membrane [GO:0016020]
J9VKK4	WT:uggt	TRUE	0.7	0.138371	18.6863	12.1804	-6.50583	0	0.011004	CNAG_01365		Uncharacterized protein
J9VN64	WT:uggt	TRUE	1	0.390284	19.095	22.4315	3.33653	0	10.1017	CNAG_02116		Arf/Sar family protein	anterograde axonal transport [GO:0008089]; protein transport [GO:0015031]		GTP binding [GO:0005525]; GTPase activity [GO:0003924]
J9VKA3	WT:uggt	TRUE	0.7	0.436418	18.6698	15.2702	-3.3996	0	0.0947585	CNAG_06766		U3 small nucleolar RNA-associated protein 14	rRNA processing [GO:0006364]	nucleolus [GO:0005730]; small-subunit processome [GO:0032040]
J9VN69	WT:uggt	TRUE	0.7	0.479041	22.7527	21.6663	-1.08646	0	0.470914	CNAG_06602		D-lactate dehydratase (EC 4.2.1.130)	methylglyoxal catabolic process to D-lactate via S-lactoyl-glutathione [GO:0019243]	cytoplasm [GO:0005737]	glyoxalase III activity [GO:0019172]
J9VN99	WT:uggt	TRUE	0.7	0.530319	23.542	20.514	-3.02802	0	0.122595	COQ3 CNAG_02609		Ubiquinone biosynthesis O-methyltransferase, mitochondrial (3-demethylubiquinol 3-O-methyltransferase) (EC 2.1.1.64) (Polyprenyldihydroxybenzoate methyltransferase) (EC 2.1.1.114)	methylation [GO:0032259]	extrinsic component of mitochondrial inner membrane [GO:0031314]	2-polyprenyl-6-methoxy-1,4-benzoquinone methyltransferase activity [GO:0008425]; 3,4-dihydroxy-5-polyprenylbenzoic acid O-methyltransferase activity [GO:0010420]; 3-demethylubiquinol-n 3-O-methyltransferase activity [GO:0061542]
J9W1I4	WT:uggt	TRUE	0.1	0.123606	25.1785	24.6951	-0.48338	0	0.7153	CNAG_01722		Vacuolar protein sorting-associated protein	late endosome to vacuole transport [GO:0045324]; lipid transport [GO:0006869]; mitochondrion organization [GO:0007005]; protein retention in Golgi apparatus [GO:0045053]; protein targeting to vacuole [GO:0006623]	extrinsic component of membrane [GO:0019898]; Golgi apparatus [GO:0005794]
J9VTL7	WT:uggt	TRUE	0.2	0.152038	23.5763	22.9811	-0.595144	0	0.661978	CNAG_04611		E2 ubiquitin-conjugating enzyme (EC 2.3.2.23)	protein polyubiquitination [GO:0000209]; ubiquitin-dependent protein catabolic process [GO:0006511]	nucleus [GO:0005634]	ATP binding [GO:0005524]; ubiquitin conjugating enzyme activity [GO:0061631]
J9VSU9	WT:uggt	TRUE	0.7	0.350602	23.9738	19.0101	-4.96369	0	0.0320464	CNAG_01345		Small subunit ribosomal protein S2	translation [GO:0006412]	cytosolic small ribosomal subunit [GO:0022627]; mitochondrial small ribosomal subunit [GO:0005763]	structural constituent of ribosome [GO:0003735]
J9VRR0	WT:uggt	TRUE	0.1	0.104364	14.9347	22.6115	7.6767	0	204.606	CNAG_04191		SCYL protein kinase	tRNA export from nucleus [GO:0006409]	cytoplasm [GO:0005737]	ATP binding [GO:0005524]; protein kinase activity [GO:0004672]
J9VL98	WT:uggt	TRUE	0.1	0.000297424	22.6652	23.213	0.547835	0	1.46189	CNAG_04955		Oxidoreductase			NAD binding [GO:0051287]; oxidoreductase activity [GO:0016491]
J9VSR6	WT:uggt	TRUE	0.7	0.129225	17.4897	11.6606	-5.82915	0	0.0175894	CNAG_04742		DNA primase large subunit	DNA replication initiation [GO:0006270]; DNA replication, synthesis of primer [GO:0006269]	alpha DNA polymerase:primase complex [GO:0005658]; primosome complex [GO:1990077]	4 iron, 4 sulfur cluster binding [GO:0051539]; DNA binding [GO:0003677]; metal ion binding [GO:0046872]
J9VNT0	WT:uggt	TRUE	0.1	0.0343613	25.7636	25.0531	-0.710479	0	0.611117	CNAG_01060		RRM domain-containing protein	positive regulation of mRNA splicing, via spliceosome [GO:0048026]	spliceosomal complex [GO:0005681]	RNA binding [GO:0003723]
J9VNG9	WT:uggt	TRUE	0.1	0.055084	24.622	14.7239	-9.89803	0	0.00104809	CNAG_05689		Pre-mRNA-splicing factor SPF27	mRNA processing [GO:0006397]	catalytic step 2 spliceosome [GO:0071013]; precatalytic spliceosome [GO:0071011]; Prp19 complex [GO:0000974]
J9VTA3	WT:uggt	TRUE	0.4	0.391366	19.4501	23.3608	3.9107	0	15.0396	CNAG_04746		ATP synthase regulation protein NCA2		mitochondrial outer membrane [GO:0005741]
J9VU82	WT:uggt	TRUE	0.1	0.00818739	26.0649	26.5211	0.456132	0	1.37186	CNAG_01800		Uncharacterized protein
J9VUS3	WT:uggt	TRUE	0.4	0.1027	23.3754	25.8141	2.43879	0	5.42187	CNAG_02393		SH3 domain-containing protein	establishment or maintenance of actin cytoskeleton polarity [GO:0030950]; signal transduction [GO:0007165]	cell tip [GO:0051286]; microtubule cytoskeleton [GO:0015630]
J9VP48	WT:uggt	TRUE	0.1	0.0718339	21.7941	25.531	3.73696	0	13.3333	CNAG_05700		Endoplasmic reticulum protein		endomembrane system [GO:0012505]; membrane [GO:0016020]
J9VYA4	WT:uggt	TRUE	0.1	0.132953	26.86	19.5089	-7.35112	0	0.00612481	CNAG_03485		Polyamine transporter 1		membrane [GO:0016020]	transmembrane transporter activity [GO:0022857]
J9VKY0	WT:uggt	TRUE	0.7	0.376951	11.0417	16.2146	5.17288	0	36.0738	CNAG_03763		IQ domain-containing GTPase activating protein	mitotic actomyosin contractile ring assembly actin filament organization [GO:1903479]	mitotic actomyosin contractile ring [GO:0110085]	actin filament binding [GO:0051015]; calmodulin binding [GO:0005516]; GTPase activator activity [GO:0005096]
J9VXG9	WT:uggt	TRUE	0.2	0.306898	24.0518	25.7601	1.70837	0	3.2679	CNAG_05512		Uncharacterized protein
J9VKM6	WT:uggt	TRUE	0.1	0.0543157	24.6914	26.0307	1.33927	0	2.53024	CNAG_01129		Terpene cyclase/mutase family member (EC 5.4.99.-)	cholesterol biosynthetic process [GO:0006695]; ergosterol biosynthetic process [GO:0006696]; triterpenoid biosynthetic process [GO:0016104]	lipid droplet [GO:0005811]	lanosterol synthase activity [GO:0000250]
J9VHW8	WT:uggt	TRUE	0.7	0.133149	26.3357	17.1328	-9.20299	0	0.00169678	CNAG_00845		Establishment of cell polarity protein	ribosomal large subunit biogenesis [GO:0042273]; ribosomal small subunit biogenesis [GO:0042274]	nucleolus [GO:0005730]	DNA binding [GO:0003677]; RNA binding [GO:0003723]
J9VXH5	WT:uggt	TRUE	0.2	0.296106	28.1788	22.0782	-6.10065	0	0.0145721	CNAG_04883		Small subunit ribosomal protein S18	translation [GO:0006412]	cytosol [GO:0005829]; small ribosomal subunit [GO:0015935]	RNA binding [GO:0003723]; structural constituent of ribosome [GO:0003735]
T2BN17	WT:uggt	TRUE	0.1	0.0676711	26.0651	25.3255	-0.739596	0	0.598907	CNAG_03482		thioredoxin-dependent peroxiredoxin (EC 1.11.1.24)	cell redox homeostasis [GO:0045454]; hydrogen peroxide catabolic process [GO:0042744]; removal of superoxide radicals [GO:0019430]	cytosol [GO:0005829]	thioredoxin peroxidase activity [GO:0008379]
J9VKX7	WT:uggt	TRUE	0.4	0.5892	26.8997	26.4701	-0.429557	0	0.74249	CNAG_01264		Homoisocitrate dehydrogenase	isocitrate metabolic process [GO:0006102]; lysine biosynthetic process [GO:0009085]; tricarboxylic acid cycle [GO:0006099]	mitochondrion [GO:0005739]	homoisocitrate dehydrogenase activity [GO:0047046]; isocitrate dehydrogenase (NAD+) activity [GO:0004449]; magnesium ion binding [GO:0000287]; NAD binding [GO:0051287]
J9VED2	WT:uggt	TRUE	0.1	0.250519	23.6206	18.9795	-4.64111	0	0.0400762	CNAG_00551		Poly(A) polymerase (EC 2.7.7.19)	mRNA processing [GO:0006397]; RNA 3'-end processing [GO:0031123]	nucleus [GO:0005634]	ATP binding [GO:0005524]; metal ion binding [GO:0046872]; poly(A) RNA polymerase activity [GO:1990817]; RNA binding [GO:0003723]
J9VUY4	WT:uggt	TRUE	0.1	0.0852929	14.9822	23.1905	8.20832	0	295.767	CNAG_02312		Patatin-like phospholipase domain-containing protein	lipid catabolic process [GO:0016042]; triglyceride metabolic process [GO:0006641]	membrane [GO:0016020]	triglyceride lipase activity [GO:0004806]
J9VU09	WT:uggt	TRUE	0.7	0.715113	14.012	16.2978	2.28583	0	4.87645	CNAG_07674		Peptidase S9 prolyl oligopeptidase catalytic domain-containing protein
J9VSD2	WT:uggt	TRUE	1	0.943632	23.3749	23.4061	0.0312873	0	1.02192	CNAG_04848		mRNA binding protein		cytoplasm [GO:0005737]; nucleus [GO:0005634]	mRNA binding [GO:0003729]
J9W1E5	WT:uggt	TRUE	0.1	0.192699	23.6505	18.3907	-5.25987	0	0.0260988	CNAG_05396		ADP-ribose 1''-phosphate phosphatase (EC 3.1.3.84)	DNA damage response [GO:0006974]; purine nucleoside metabolic process [GO:0042278]	nucleoplasm [GO:0005654]	ADP-ribosylglutamate hydrolase activity [GO:0140293]
J9VPJ3	WT:uggt	TRUE	0.7	0.862094	11.1216	11.2099	0.0883472	0	1.06315	CNAG_02488		Methionyl-tRNA formyltransferase	biosynthetic process [GO:0009058]		transferase activity [GO:0016740]
J9VTQ0	WT:uggt	TRUE	0.4	0.156856	23.8671	24.2496	0.382456	0	1.30356	CNAG_07747		Acyl-coenzyme A oxidase	fatty acid beta-oxidation using acyl-CoA oxidase [GO:0033540]; lipid homeostasis [GO:0055088]	peroxisome [GO:0005777]	FAD binding [GO:0071949]; fatty acid binding [GO:0005504]; pristanoyl-CoA oxidase activity [GO:0016402]
J9VUK0	WT:uggt	TRUE	0.1	0.117061	28.2969	27.0053	-1.29164	0	0.408485	CNAG_05978		glutamate--tRNA ligase (EC 6.1.1.17) (Glutamyl-tRNA synthetase)	glutamyl-tRNA aminoacylation [GO:0006424]	cytosol [GO:0005829]; methionyl glutamyl tRNA synthetase complex [GO:0017102]	ATP binding [GO:0005524]; glutamate-tRNA ligase activity [GO:0004818]
J9VFS8	WT:uggt	TRUE	0.7	0.392772	23.35	19.0141	-4.33592	0	0.0495174	CNAG_00792		ATP-binding cassette transporter		membrane [GO:0016020]	ABC-type transporter activity [GO:0140359]; ATP binding [GO:0005524]; ATP hydrolysis activity [GO:0016887]
J9VM83	WT:uggt	TRUE	0.7	0.512288	22.6585	23.4913	0.832783	0	1.78112	CNAG_00671		Cytoplasmic protein	rescue of stalled ribosome [GO:0072344]; ribosome-associated ubiquitin-dependent protein catabolic process [GO:1990116]	cytoplasm [GO:0005737]; RQC complex [GO:1990112]
J9VEY1	WT:uggt	TRUE	0.1	0.00416736	21.1064	21.9046	0.798186	0	1.73891	CNAG_00507		Nitrilase	detoxification of nitrogen compound [GO:0051410]	membrane [GO:0016020]	nitrilase activity [GO:0000257]; nitrile hydratase activity [GO:0018822]
J9VUI6	WT:uggt	TRUE	0.4	0.135088	17.3967	11.5292	-5.86749	0	0.0171281	CNAG_05963		RING-type domain-containing protein	protein ubiquitination [GO:0016567]; replication fork processing [GO:0031297]	nucleus [GO:0005634]; site of DNA damage [GO:0090734]	ubiquitin protein ligase activity [GO:0061630]
J9W0C5	WT:uggt	TRUE	0.7	0.264691	18.8907	14.2811	-4.60957	0	0.0409621	CNAG_06157		Uncharacterized protein
J9W167	WT:uggt	TRUE	0.1	0.308102	24.778	19.741	-5.03703	0	0.0304581	CNAG_01615		Aldo-keto reductase	small molecule metabolic process [GO:0044281]		oxidoreductase activity [GO:0016491]
J9VIB0	WT:uggt	TRUE	0.1	0.0488463	22.5657	21.7772	-0.788554	0	0.578924	CNAG_02789		Nitrogen permease regulator 2	cellular response to amino acid starvation [GO:0034198]; negative regulation of TORC1 signaling [GO:1904262]; positive regulation of autophagy [GO:0010508]	GATOR1 complex [GO:1990130]; vacuolar membrane [GO:0005774]	GTPase activator activity [GO:0005096]
J9VSW4	WT:uggt	TRUE	0.1	0.103548	27.2259	26.0388	-1.18709	0	0.439188	CNAG_02110		Peptide alpha-N-acetyltransferase		NatA complex [GO:0031415]	transferase activity [GO:0016740]
J9VTE6	WT:uggt	TRUE	0.4	0.321676	19.545	24.2574	4.71243	0	26.2169	CNAG_03466		RNA-dependent RNA polymerase (EC 2.7.7.48)	siRNA processing [GO:0030422]	nuclear RNA-directed RNA polymerase complex [GO:0031380]	RNA binding [GO:0003723]; RNA-dependent RNA polymerase activity [GO:0003968]
J9VWG4	WT:uggt	TRUE	0.4	0.333677	11.5242	15.7678	4.2436	0	18.9431	CNAG_05390		Uncharacterized protein		membrane [GO:0016020]
J9VM66	WT:uggt	TRUE	0.1	0.163665	28.2545	25.3393	-2.91519	0	0.132568	CNAG_00656		Large subunit ribosomal protein L7e	maturation of LSU-rRNA from tricistronic rRNA transcript (SSU-rRNA, 5.8S rRNA, LSU-rRNA) [GO:0000463]	cytosolic large ribosomal subunit [GO:0022625]	RNA binding [GO:0003723]; structural constituent of ribosome [GO:0003735]
J9VIS3	WT:uggt	TRUE	0.7	0.380481	26.5633	24.573	-1.9903	0	0.251687	CNAG_07354		3'(2'),5'-bisphosphate nucleotidase (EC 3.1.3.7)	sulfate assimilation [GO:0000103]		3'(2'),5'-bisphosphate nucleotidase activity [GO:0008441]; metal ion binding [GO:0046872]
J9VPI0	WT:uggt	TRUE	0.1	0.301182	25.8292	20.7462	-5.08303	0	0.0295022	CNAG_02501		Protein phosphatase inhibitor 2	regulation of signal transduction [GO:0009966]		protein phosphatase inhibitor activity [GO:0004864]
J9VLV9	WT:uggt	TRUE	0.1	0.299355	21.9994	18.1537	-3.84571	0	0.0695545	CNAG_00554		Inositol phosphorylsphingolipid-phospholipase C		membrane [GO:0016020]	sphingomyelin phosphodiesterase activity [GO:0004767]
J9VIQ6	WT:uggt	TRUE	0.1	0.0590356	29.129	27.6765	-1.45252	0	0.365384	CNAG_05068		GTP-binding protein ypt1	endocytic recycling [GO:0032456]	endosome membrane [GO:0010008]; plasma membrane [GO:0005886]	GTP binding [GO:0005525]; GTPase activity [GO:0003924]
J9VDT9	WT:uggt	TRUE	0.1	0.0975782	28.0161	26.6006	-1.41549	0	0.374882	CNAG_00065		Ran-binding protein 1	NLS-bearing protein import into nucleus [GO:0006607]; positive regulation of mitotic centrosome separation [GO:0046604]	cytoplasm [GO:0005737]; nuclear pore [GO:0005643]	GTPase activator activity [GO:0005096]
T2BNA6	WT:uggt	TRUE	1	0.873995	11.0158	10.9188	-0.0969392	0	0.935015	CNAG_07998		CCHC-type domain-containing protein			nucleic acid binding [GO:0003676]; zinc ion binding [GO:0008270]
J9VYI2	WT:uggt	TRUE	0.1	0.00510597	26.5264	25.7205	-0.805843	0	0.572028	CNAG_06248	CLU1 TIF31	Clustered mitochondria protein homolog (Protein TIF31 homolog)	intracellular distribution of mitochondria [GO:0048312]	cytoplasm [GO:0005737]	mRNA binding [GO:0003729]
T2BNH7	WT:uggt	TRUE	0.1	0.0970573	24.8562	15.7205	-9.13574	0	0.00177774	CNAG_01823	INM1	Inositol-1-monophosphatase (EC 3.1.3.25)	inositol biosynthetic process [GO:0006021]; phosphatidylinositol phosphate biosynthetic process [GO:0046854]; signal transduction [GO:0007165]		inositol monophosphate 1-phosphatase activity [GO:0008934]; inositol monophosphate 3-phosphatase activity [GO:0052832]; inositol monophosphate 4-phosphatase activity [GO:0052833]; metal ion binding [GO:0046872]
J9VZA7	WT:uggt	TRUE	0.7	0.836556	11.2789	11.4206	0.141692	0	1.1032	CNAG_01771		Cytochrome b5 heme-binding domain-containing protein		endoplasmic reticulum [GO:0005783]; membrane [GO:0016020]
O94746	WT:uggt	TRUE	1	0.613924	28.2901	28.9238	0.633612	0	1.55144	CNAG_03682	FRR1	FK506-binding protein 1 (FKBP) (EC 5.2.1.8) (Peptidyl-prolyl cis-trans isomerase) (PPIase) (Rapamycin-binding protein)		cytoplasm [GO:0005737]	peptidyl-prolyl cis-trans isomerase activity [GO:0003755]
J9W4B1	WT:uggt	TRUE	0.1	0.0695899	23.0499	14.2882	-8.76172	0	0.00230388	CNAG_05654	TSH2	Pali-domain-containing protein		cell division site [GO:0032153]; growing cell tip [GO:0035838]; plasma membrane [GO:0005886]
J9VZ71	WT:uggt	TRUE	0.1	0.198417	25.5262	21.6173	-3.90894	0	0.0665719	CNAG_04304		T-complex protein 1 subunit zeta (CCT-zeta)		chaperonin-containing T-complex [GO:0005832]	ATP binding [GO:0005524]; ATP hydrolysis activity [GO:0016887]; ATP-dependent protein folding chaperone [GO:0140662]; unfolded protein binding [GO:0051082]
J9VPY9	WT:uggt	TRUE	0.7	0.821056	25.3201	25.4363	0.116178	0	1.08386	CNAG_03306		Vesicle transport through interaction with t-SNAREs 1	Golgi to vacuole transport [GO:0006896]; intra-Golgi vesicle-mediated transport [GO:0006891]; intracellular protein transport [GO:0006886]; macroautophagy [GO:0016236]; retrograde transport, endosome to Golgi [GO:0042147]; vesicle fusion with Golgi apparatus [GO:0048280]	cytosol [GO:0005829]; endoplasmic reticulum membrane [GO:0005789]; ER to Golgi transport vesicle membrane [GO:0012507]; Golgi apparatus [GO:0005794]; late endosome membrane [GO:0031902]; SNARE complex [GO:0031201]	SNAP receptor activity [GO:0005484]; SNARE binding [GO:0000149]
T2BN06	WT:uggt	TRUE	0.7	0.469991	11.1877	11.5449	0.357235	0	1.28097	CNAG_03230		Protein yippee-like
J9VN16	WT:uggt	TRUE	0.4	0.222305	25.3966	24.7798	-0.616799	0	0.652116	CNAG_02177		Serine/threonine-protein phosphatase (EC 3.1.3.16)	G1/S transition of mitotic cell cycle [GO:0000082]	cytosol [GO:0005829]; nucleus [GO:0005634]	myosin phosphatase activity [GO:0017018]
J9VKE2	WT:uggt	TRUE	0.7	0.398105	27.5365	22.4325	-5.10396	0	0.0290773	CNAG_02812		ornithine carbamoyltransferase (EC 2.1.3.3)	arginine biosynthetic process via ornithine [GO:0042450]; citrulline biosynthetic process [GO:0019240]	mitochondrion [GO:0005739]	amino acid binding [GO:0016597]; ornithine carbamoyltransferase activity [GO:0004585]
J9VRT3	WT:uggt	TRUE	0.7	0.378742	23.0804	23.9578	0.877397	0	1.83706	CNAG_04467		Succinate-semialdehyde dehydrogenase (EC 1.2.1.16)	gamma-aminobutyric acid catabolic process [GO:0009450]	cytosol [GO:0005829]; mitochondrion [GO:0005739]	succinate-semialdehyde dehydrogenase (NAD+) activity [GO:0004777]; succinate-semialdehyde dehydrogenase (NADP+) activity [GO:0036243]
J9VN87	WT:uggt	TRUE	1	0.379502	16.6851	11.3053	-5.37979	0	0.0240172	CNAG_02090		Guanine nucleotide-binding protein G(O) subunit alpha	G protein-coupled receptor signaling pathway [GO:0007186]; pheromone-dependent signal transduction involved in conjugation with cellular fusion [GO:0000750]; Rho protein signal transduction [GO:0007266]	heterotrimeric G-protein complex [GO:0005834]	G protein-coupled receptor binding [GO:0001664]; G-protein beta/gamma-subunit complex binding [GO:0031683]; GTP binding [GO:0005525]; GTPase activity [GO:0003924]
J9VI36	WT:uggt	TRUE	0.7	0.177332	25.348	18.3224	-7.02565	0	0.00767484	CNAG_07519		Major facilitator superfamily (MFS) profile domain-containing protein		membrane [GO:0016020]	transmembrane transporter activity [GO:0022857]
J9VLF3	WT:uggt	TRUE	0.1	0.0690541	25.6021	26.1997	0.597633	0	1.51323	CNAG_01063		WD-repeat protein mip1	cellular response to amino acid stimulus [GO:0071230]; cellular response to starvation [GO:0009267]; positive regulation of cell growth [GO:0030307]; regulation of autophagy [GO:0010506]; TORC1 signaling [GO:0038202]	cytoplasm [GO:0005737]; TORC1 complex [GO:0031931]	protein-macromolecule adaptor activity [GO:0030674]
J9VKM4	WT:uggt	TRUE	0.1	0.294322	11.3041	12.004	0.699911	0	1.6244	CNAG_07310		Uncharacterized protein		membrane [GO:0016020]
J9VEF3	WT:uggt	TRUE	1	0.575572	18.573	15.4157	-3.15728	0	0.11209	CNAG_00582		Vacuolar transporter chaperone 1	microautophagy [GO:0016237]; polyphosphate metabolic process [GO:0006797]; vacuolar transport [GO:0007034]; vacuole fusion, non-autophagic [GO:0042144]	fungal-type vacuole membrane [GO:0000329]; vacuolar transporter chaperone complex [GO:0033254]
J9VWI4	WT:uggt	TRUE	0.4	0.138481	22.3232	23.6016	1.27847	0	2.42582	CNAG_04217		Phosphoenolpyruvate carboxykinase (ATP) (EC 4.1.1.49)	gluconeogenesis [GO:0006094]	cytosol [GO:0005829]	ATP binding [GO:0005524]; kinase activity [GO:0016301]; phosphoenolpyruvate carboxykinase (ATP) activity [GO:0004612]
J9VTA4	WT:uggt	TRUE	0.1	0.307435	26.0768	20.7282	-5.34865	0	0.0245412	CNAG_01480		Large subunit ribosomal protein L12	translation [GO:0006412]	cytosolic large ribosomal subunit [GO:0022625]	large ribosomal subunit rRNA binding [GO:0070180]; structural constituent of ribosome [GO:0003735]
J9W340	WT:uggt	TRUE	0.7	0.342115	24.0008	23.0877	-0.913127	0	0.531033	CNAG_06352		CAP-Gly domain-containing protein	cytoplasmic microtubule organization [GO:0031122]; establishment of mitotic spindle orientation [GO:0000132]; nuclear migration involved in conjugation with cellular fusion [GO:0000743]	cell tip [GO:0051286]; cytoplasm [GO:0005737]; kinetochore [GO:0000776]; microtubule associated complex [GO:0005875]; microtubule plus-end [GO:0035371]; nucleus [GO:0005634]; spindle pole [GO:0000922]; spindle pole body [GO:0005816]	microtubule plus-end binding [GO:0051010]
J9VZA6	WT:uggt	TRUE	0.7	0.187235	21.2591	15.488	-5.7711	0	0.0183116	CNAG_04344		Galactonate dehydratase	amino acid catabolic process [GO:0009063]; D-galactonate catabolic process [GO:0034194]		galactonate dehydratase activity [GO:0008869]
J9VWJ6	WT:uggt	TRUE	0.7	0.934731	17.7373	18.1258	0.388543	0	1.30907	CNAG_05756		Mitochondrial protein	mitochondrial cytochrome c oxidase assembly [GO:0033617]	membrane [GO:0016020]; mitochondrion [GO:0005739]
J9VG39	WT:uggt	TRUE	0.7	0.384612	24.5734	23.3432	-1.23018	0	0.426266	CNAG_03841		Nitrogen regulatory protein areA GATA-like domain-containing protein	mitochondria-nucleus signaling pathway [GO:0031930]; negative regulation of transcription by RNA polymerase II [GO:0000122]; regulation of nitrogen utilization [GO:0006808]	cytoplasm [GO:0005737]
J9VRV0	WT:uggt	TRUE	0.4	0.220247	22.9791	22.1997	-0.779339	0	0.582633	CNAG_05140		Methylenetetrahydrofolate reductase	methionine biosynthetic process [GO:0009086]; tetrahydrofolate interconversion [GO:0035999]	cytosol [GO:0005829]	FAD binding [GO:0071949]; methylenetetrahydrofolate reductase (NAD(P)H) activity [GO:0004489]
J9VWQ5	WT:uggt	TRUE	0.2	0.123149	26.1601	25.045	-1.11508	0	0.461666	CNAG_04308		3-hydroxyacyl-CoA dehydrogenase (EC 1.1.1.35)	fatty acid beta-oxidation [GO:0006635]	mitochondrial matrix [GO:0005759]	3-hydroxyacyl-CoA dehydrogenase activity [GO:0003857]; NAD+ binding [GO:0070403]
J9VYC3	WT:uggt	TRUE	0.1	0.278904	24.5485	22.4512	-2.09735	0	0.233688	CNAG_06179		Cytoplasmic protein		membrane [GO:0016020]; mitochondrion [GO:0005739]
J9VNL2	WT:uggt	TRUE	0.7	0.50933	11.8679	11.6135	-0.254384	0	0.838345	CNAG_06558	TAH18	NADPH-dependent diflavin oxidoreductase 1 (EC 1.18.1.-) (NADPH-dependent FMN and FAD-containing oxidoreductase)	iron-sulfur cluster assembly [GO:0016226]	cytosol [GO:0005829]; mitochondrion [GO:0005739]	flavin adenine dinucleotide binding [GO:0050660]; FMN binding [GO:0010181]; NADP binding [GO:0050661]; NADPH-hemoprotein reductase activity [GO:0003958]
J9VVE1	WT:uggt	TRUE	0.7	0.956012	14.856	15.1826	0.326584	0	1.25404	CNAG_06180		NADH dehydrogenase [ubiquinone] iron-sulfur protein 4, mitochondrial	electron transport chain [GO:0022900]	mitochondrial respiratory chain complex I [GO:0005747]
J9VN62	WT:uggt	TRUE	0.7	0.172899	22.5795	15.1949	-7.38459	0	0.00598435	CNAG_03637		ATP-dependent DNA helicase II subunit 2 (EC 3.6.4.12) (ATP-dependent DNA helicase II subunit Ku80)	DNA recombination [GO:0006310]; double-strand break repair via nonhomologous end joining [GO:0006303]; telomere maintenance [GO:0000723]	chromosome, telomeric region [GO:0000781]; Ku70:Ku80 complex [GO:0043564]	ATP binding [GO:0005524]; damaged DNA binding [GO:0003684]; double-stranded DNA binding [GO:0003690]; helicase activity [GO:0004386]; hydrolase activity [GO:0016787]; telomeric DNA binding [GO:0042162]
J9VV84	WT:uggt	TRUE	0.1	0.124107	12.045	11.3461	-0.698901	0	0.616042	CNAG_02200		Uncharacterized protein		membrane [GO:0016020]
J9VMN1	WT:uggt	TRUE	0.7	0.568471	26.3507	26.4797	0.129021	0	1.09355	CNAG_01437		KRR1 small subunit processome component (KRR-R motif-containing protein 1)	rRNA processing [GO:0006364]	nucleolus [GO:0005730]; small-subunit processome [GO:0032040]	RNA binding [GO:0003723]
J9VVL3	WT:uggt	TRUE	0.7	0.285217	23.5918	25.3075	1.71576	0	3.28471	CNAG_02064		TATA-box-binding protein-associated factor		nucleus [GO:0005634]	ATP binding [GO:0005524]; ATP hydrolysis activity [GO:0016887]; ATP-dependent chromatin remodeler activity [GO:0140658]; DNA binding [GO:0003677]; helicase activity [GO:0004386]; TBP-class protein binding [GO:0017025]
J9VKK9	WT:uggt	TRUE	0.4	0.347402	24.0846	23.5776	-0.507001	0	0.703684	CNAG_01360		Pumilio domain-containing protein c	nuclear-transcribed mRNA catabolic process, deadenylation-dependent decay [GO:0000288]		RNA binding [GO:0003723]
J9VP81	WT:uggt	TRUE	0.4	0.202512	27.1071	27.6037	0.496567	0	1.41085	CNAG_05976		Nucleolar protein 58		box C/D methylation guide snoRNP complex [GO:0031428]; nucleolus [GO:0005730]; small-subunit processome [GO:0032040]	snoRNA binding [GO:0030515]
J9VXJ5	WT:uggt	TRUE	0.2	0.426895	18.4257	14.4369	-3.98876	0	0.0629888	CNAG_01941		Glucan synthesis regulatory protein	fungal-type cell wall beta-glucan biosynthetic process [GO:0070880]	mating projection tip [GO:0043332]
J9VJD6	WT:uggt	TRUE	0.7	0.139059	23.6466	15.8573	-7.78931	0	0.00452048	CNAG_05074		PLD phosphodiesterase domain-containing protein	cardiolipin biosynthetic process [GO:0032049]	membrane [GO:0016020]	cardiolipin synthase activity [GO:0008808]
J9VKY5	WT:uggt	TRUE	0.1	0.0908156	25.0903	15.2083	-9.88197	0	0.00105982	CNAG_01005		Glutaredoxin	cellular response to oxidative stress [GO:0034599]	cytoplasm [GO:0005737]; nucleus [GO:0005634]	glutathione disulfide oxidoreductase activity [GO:0015038]
J9VLW6	WT:uggt	TRUE	0.7	0.534078	21.1877	18.8287	-2.35903	0	0.194922	CNAG_02373		ATP-binding protein	intracellular protein transport [GO:0006886]; vesicle-mediated transport [GO:0016192]	CORVET complex [GO:0033263]; fungal-type vacuole [GO:0000324]	ATP binding [GO:0005524]
J9VQI0	WT:uggt	TRUE	0.1	0.0989708	27.5571	25.3595	-2.19753	0	0.218011	CNAG_03283		Large subunit ribosomal protein L24e	cytoplasmic translation [GO:0002181]	cytosolic large ribosomal subunit [GO:0022625]	mRNA binding [GO:0003729]; structural constituent of ribosome [GO:0003735]
J9VMK1	WT:uggt	TRUE	0.7	0.18255	22.5513	16.9442	-5.60711	0	0.0205159	CNAG_02857		Arrestin C-terminal-like domain-containing protein	ubiquitin-dependent endocytosis [GO:0070086]	cytosol [GO:0005829]; plasma membrane [GO:0005886]	protein-macromolecule adaptor activity [GO:0030674]; ubiquitin protein ligase binding [GO:0031625]
J9VML1	WT:uggt	TRUE	0.1	0.309004	23.2293	19.115	-4.11434	0	0.0577378	CNAG_02356		Phosphatidylinositol glycan, class F	GPI anchor biosynthetic process [GO:0006506]	endoplasmic reticulum membrane [GO:0005789]
J9VR13	WT:uggt	TRUE	0.1	0.0338406	11.7981	10.9001	-0.898001	0	0.53663	CNAG_04147		ATP-dependent rRNA helicase RRP3		nucleus [GO:0005634]	ATP binding [GO:0005524]; hydrolase activity [GO:0016787]; nucleic acid binding [GO:0003676]; RNA helicase activity [GO:0003724]
J9VYS1	WT:uggt	TRUE	0.7	0.376548	25.4419	24.6645	-0.777419	0	0.58341	CNAG_06353		tRNA pseudouridine(38-40) synthase	mRNA pseudouridine synthesis [GO:1990481]; tRNA pseudouridine synthesis [GO:0031119]	nucleus [GO:0005634]	pseudouridine synthase activity [GO:0009982]; RNA binding [GO:0003723]
J9VVA4	WT:uggt	TRUE	0.1	0.156507	29.256	27.9914	-1.2646	0	0.416214	CNAG_06150	HSP90	Hsp90-like protein	cellular response to heat [GO:0034605]; protein stabilization [GO:0050821]	cytosol [GO:0005829]; perinuclear region of cytoplasm [GO:0048471]; plasma membrane [GO:0005886]; protein-containing complex [GO:0032991]	ATP binding [GO:0005524]; ATP hydrolysis activity [GO:0016887]; ATP-dependent protein folding chaperone [GO:0140662]; disordered domain specific binding [GO:0097718]; unfolded protein binding [GO:0051082]
J9VML0	WT:uggt	TRUE	0.4	0.30331	24.8808	23.611	-1.26976	0	0.414729	CNAG_00769		mitogen-activated protein kinase kinase (EC 2.7.12.2)	cellular hyperosmotic response [GO:0071474]		ATP binding [GO:0005524]; MAP kinase kinase activity [GO:0004708]
J9VV31	WT:uggt	TRUE	0.2	0.194944	26.4282	25.8579	-0.570294	0	0.67348	CNAG_07718		Actin cytoskeleton-regulatory complex protein PAN1 (Actin cytoskeleton-regulatory complex protein pan1)	intracellular signal transduction [GO:0035556]; positive regulation of Rho protein signal transduction [GO:0035025]	cytoplasm [GO:0005737]; membrane [GO:0016020]	actin binding [GO:0003779]; calcium ion binding [GO:0005509]; guanyl-nucleotide exchange factor activity [GO:0005085]
J9VVM7	WT:uggt	TRUE	0.7	0.971412	24.7229	24.7478	0.0248866	0	1.0174	CNAG_04776		Homoserine dehydrogenase (HDH) (EC 1.1.1.3)	homoserine biosynthetic process [GO:0009090]; isoleucine biosynthetic process [GO:0009097]; methionine biosynthetic process [GO:0009086]; threonine biosynthetic process [GO:0009088]		homoserine dehydrogenase activity [GO:0004412]; NADP binding [GO:0050661]
J9VRX9	WT:uggt	TRUE	0.1	0.252375	24.0482	19.2477	-4.80047	0	0.0358851	CNAG_05847		Thioredoxin reductase (EC 1.8.1.9)	cell redox homeostasis [GO:0045454]; removal of superoxide radicals [GO:0019430]	cytosol [GO:0005829]; mitochondrion [GO:0005739]	metal ion binding [GO:0046872]; nucleotide binding [GO:0000166]; thioredoxin-disulfide reductase (NADPH) activity [GO:0004791]
J9VSV7	WT:uggt	TRUE	0.2	0.441065	19.5509	15.082	-4.46891	0	0.045157	CNAG_03250		DUF202 domain-containing protein		fungal-type vacuole membrane [GO:0000329]; vacuolar transporter chaperone complex [GO:0033254]
J9VHT4	WT:uggt	TRUE	0.2	0.290182	29.3812	28.1071	-1.27406	0	0.413494	CNAG_00040		Cytochrome P450, family 51 (Sterol 14-demethylase)	bile acid biosynthetic process [GO:0006699]; cholesterol homeostasis [GO:0042632]; methylation [GO:0032259]	membrane [GO:0016020]	heme binding [GO:0020037]; iron ion binding [GO:0005506]; methyltransferase activity [GO:0008168]; oxysterol 7-alpha-hydroxylase activity [GO:0008396]; steroid 7-alpha-hydroxylase activity [GO:0008387]
J9VL93	WT:uggt	TRUE	0.7	0.435791	25.3169	24.1523	-1.16462	0	0.446081	CNAG_04950		PRA1 family protein	vesicle-mediated transport [GO:0016192]	endoplasmic reticulum [GO:0005783]; Golgi apparatus [GO:0005794]; membrane [GO:0016020]
J9VIW1	WT:uggt	TRUE	0.7	0.380205	26.318	20.9621	-5.35588	0	0.0244185	CNAG_06892	ATG3	Autophagy-related protein 3 (Autophagy-related E2-like conjugation enzyme ATG3)	autophagosome assembly [GO:0000045]; nucleophagy [GO:0044804]	cytosol [GO:0005829]; phagophore assembly site [GO:0000407]	Atg8-family ligase activity [GO:0019776]
J9VR22	WT:uggt	TRUE	0.4	0.358184	14.7586	10.9643	-3.79431	0	0.0720776	CNAG_01087		RING-type E3 ubiquitin transferase (EC 2.3.2.27)	protein ubiquitination [GO:0016567]	cytoplasm [GO:0005737]	ubiquitin protein ligase activity [GO:0061630]
J9VJS2	WT:uggt	TRUE	0.2	0.317901	14.7658	11.2198	-3.54597	0	0.0856162	CNAG_01430		DASH complex subunit DUO1 (Outer kinetochore protein DUO1)	mitotic cell cycle [GO:0000278]	cytoplasm [GO:0005737]; DASH complex [GO:0042729]; mitotic spindle [GO:0072686]
J9VJW0	WT:uggt	TRUE	1	0.893796	24.4144	24.5225	0.108195	0	1.07788	CNAG_05256	CAT2	Catalase	hydrogen peroxide catabolic process [GO:0042744]; response to hydrogen peroxide [GO:0042542]	mitochondrion [GO:0005739]; peroxisome [GO:0005777]	catalase activity [GO:0004096]; heme binding [GO:0020037]; metal ion binding [GO:0046872]
J9W066	WT:uggt	TRUE	0.1	0.0061422	23.5972	22.9422	-0.654975	0	0.635087	CNAG_06129		Golgi apparatus membrane protein TVP23	protein secretion [GO:0009306]; vesicle-mediated transport [GO:0016192]	Golgi membrane [GO:0000139]
J9VKA2	WT:uggt	TRUE	1	0.380198	26.5064	25.8902	-0.616161	0	0.652405	CNAG_06806		Probable electron transfer flavoprotein subunit alpha	fatty acid beta-oxidation using acyl-CoA dehydrogenase [GO:0033539]	mitochondrial matrix [GO:0005759]	electron transfer activity [GO:0009055]; flavin adenine dinucleotide binding [GO:0050660]
J9VRK4	WT:uggt	TRUE	0.2	0.197666	23.0566	17.8857	-5.17093	0	0.0277584	CNAG_04361		Uncharacterized protein	eisosome assembly [GO:0070941]; endocytosis [GO:0006897]	eisosome filament [GO:0036286]; plasma membrane [GO:0005886]	lipid binding [GO:0008289]
J9VKB8	WT:uggt	TRUE	0.1	0.214929	24.4248	23.4865	-0.938247	0	0.521867	CNAG_06746		Histone H2B		nucleosome [GO:0000786]; nucleus [GO:0005634]	DNA binding [GO:0003677]; protein heterodimerization activity [GO:0046982]; structural constituent of chromatin [GO:0030527]
J9VX28	WT:uggt	TRUE	0.1	0.072462	21.3553	14.3815	-6.97381	0	0.00795559	CNAG_04459		Uncharacterized protein
J9VT67	WT:uggt	TRUE	0.7	0.611436	21.9168	19.4839	-2.43282	0	0.185203	CNAG_06534		3-hydroxy-3-methylglutaryl coenzyme A reductase (HMG-CoA reductase) (EC 1.1.1.34)	coenzyme A metabolic process [GO:0015936]; ergosterol biosynthetic process [GO:0006696]; isoprenoid biosynthetic process [GO:0008299]	endoplasmic reticulum membrane [GO:0005789]; peroxisomal membrane [GO:0005778]	hydroxymethylglutaryl-CoA reductase (NADPH) activity [GO:0004420]
J9VLU7	WT:uggt	TRUE	0.2	0.236832	23.3658	24.0013	0.635498	0	1.55347	CNAG_04069		U4/U6 small nuclear ribonucleoprotein PRP31	spliceosomal tri-snRNP complex assembly [GO:0000244]	precatalytic spliceosome [GO:0071011]; U4 snRNP [GO:0005687]; U4/U6 x U5 tri-snRNP complex [GO:0046540]	RNA binding [GO:0003723]
J9VR55	WT:uggt	TRUE	1	0.989325	14.3675	14.4361	0.0685655	0	1.04867	CNAG_01048		RRM domain-containing protein	mRNA splicing, via spliceosome [GO:0000398]	nuclear speck [GO:0016607]	RNA binding [GO:0003723]
J9VNH2	WT:uggt	TRUE	1	0.612055	17.255	14.7263	-2.52877	0	0.173287	CNAG_06524		ferric-chelate reductase (NADPH) (EC 1.16.1.9)	copper ion import [GO:0015677]; intracellular iron ion homeostasis [GO:0006879]; iron ion transport [GO:0006826]	plasma membrane [GO:0005886]	ferric-chelate reductase activity [GO:0000293]
J9VRU7	WT:uggt	TRUE	0.7	0.819469	25.5753	25.475	-0.100221	0	0.93289	CNAG_05817		GDP-mannose transporter (GMT)	carbohydrate transport [GO:0008643]	cytoplasmic vesicle membrane [GO:0030659]; endoplasmic reticulum membrane [GO:0005789]; Golgi membrane [GO:0000139]	antiporter activity [GO:0015297]; GDP-fucose transmembrane transporter activity [GO:0005457]
J9W1A3	WT:uggt	TRUE	0.7	0.594291	22.4787	19.9749	-2.50381	0	0.17631	CNAG_05348		Cell division control protein 42 homolog (EC 3.6.5.2)	Cdc42 protein signal transduction [GO:0032488]; cell division [GO:0051301]; endocytosis [GO:0006897]; establishment or maintenance of cell polarity [GO:0007163]; modification of synaptic structure [GO:0099563]; regulation of cellular component organization [GO:0051128]	organelle [GO:0043226]; plasma membrane [GO:0005886]	G protein activity [GO:0003925]; GTP binding [GO:0005525]; protein kinase binding [GO:0019901]
J9VVP0	WT:uggt	TRUE	0.2	0.115929	21.811	14.8491	-6.96195	0	0.0080213	CNAG_04761		Ras family protein	Ras protein signal transduction [GO:0007265]	plasma membrane [GO:0005886]	GDP binding [GO:0019003]; GTP binding [GO:0005525]; GTPase activity [GO:0003924]
J9VQP5	WT:uggt	TRUE	0.4	0.288409	10.8365	14.7525	3.916	0	15.095	CNAG_01242		BZIP domain-containing protein		RNA polymerase II transcription regulator complex [GO:0090575]	DNA-binding transcription activator activity, RNA polymerase II-specific [GO:0001228]; transcription cis-regulatory region binding [GO:0000976]
J9VSL9	WT:uggt	TRUE	0.1	0.0317578	24.5083	23.6923	-0.816001	0	0.568014	CNAG_04789		Metallo-beta-lactamase domain-containing protein
J9VYI4	WT:uggt	TRUE	0.7	0.384174	24.3486	20.3515	-3.99704	0	0.0626282	CNAG_03566		Uncharacterized protein		membrane [GO:0016020]
J9VER9	WT:uggt	TRUE	0.4	0.921078	14.083	14.4428	0.359755	0	1.28321	CNAG_00712		Spp2/MOS2 G-patch domain-containing protein	mRNA splicing, via spliceosome [GO:0000398]	spliceosomal complex [GO:0005681]
J9VZJ8	WT:uggt	TRUE	0.1	0.138457	25.8243	18.9783	-6.846	0	0.00869258	CNAG_01893	GST3	Glutathione S-transferase Gst3		cytoplasm [GO:0005737]	glutathione transferase activity [GO:0004364]
J9VKE5	WT:uggt	TRUE	0.1	0.0972476	25.5641	19.8035	-5.76059	0	0.0184455	CNAG_01216		6-phosphogluconolactonase (6PGL) (EC 3.1.1.31)	carbohydrate metabolic process [GO:0005975]; pentose-phosphate shunt [GO:0006098]		6-phosphogluconolactonase activity [GO:0017057]
J9VQT6	WT:uggt	TRUE	0.1	0.200013	24.701	18.9015	-5.7995	0	0.0179547	CNAG_07108		Tip120-family protein	protein ubiquitination [GO:0016567]; SCF complex assembly [GO:0010265]	nucleus [GO:0005634]
J9VV17	WT:uggt	TRUE	0.1	0.218936	23.8428	18.7361	-5.10669	0	0.0290223	CNAG_07637		Large subunit ribosomal protein L3	translation [GO:0006412]	cytosolic large ribosomal subunit [GO:0022625]; mitochondrial large ribosomal subunit [GO:0005762]	structural constituent of ribosome [GO:0003735]
J9VE62	WT:uggt	TRUE	0.1	0.100447	15.6209	25.6284	10.0076	0	1029.38	CNAG_00465		Uncharacterized protein
J9VMA7	WT:uggt	TRUE	0.1	0.0983842	23.7986	15.2655	-8.53314	0	0.00269942	CNAG_02958	CFO2	Ferroxidase	cellular response to iron ion starvation [GO:0010106]; reductive iron assimilation [GO:0033215]	extracellular region [GO:0005576]; high-affinity iron permease complex [GO:0033573]	copper ion binding [GO:0005507]; ferroxidase activity [GO:0004322]
J9VR47	WT:uggt	TRUE	1	0.408861	23.2455	19.0573	-4.1882	0	0.0548564	CNAG_01057		COP9 signalosome complex subunit 2	protein deneddylation [GO:0000338]	COP9 signalosome [GO:0008180]; cytoplasm [GO:0005737]
J9VDX9	WT:uggt	TRUE	0.1	0.230987	10.4639	15.5839	5.11998	0	34.7751	CNAG_00106		Two-component system sensor protein		membrane [GO:0016020]	histidine phosphotransfer kinase activity [GO:0009927]; phosphorelay sensor kinase activity [GO:0000155]
J9VRH1	WT:uggt	TRUE	0.1	0.0560558	29.1931	25.2936	-3.89952	0	0.0670083	CNAG_06699	GBP1	Glyceraldehyde-3-phosphate dehydrogenase (EC 1.2.1.12)	glucose metabolic process [GO:0006006]; glycolytic process [GO:0006096]	cytosol [GO:0005829]	glyceraldehyde-3-phosphate dehydrogenase (NAD+) (phosphorylating) activity [GO:0004365]; NAD binding [GO:0051287]; NADP binding [GO:0050661]
J9VXX5	WT:uggt	TRUE	0.1	0.331172	26.798	25.5618	-1.23617	0	0.424498	CNAG_04763	PMT2	Dolichyl-phosphate-mannose--protein mannosyltransferase (EC 2.4.1.109)		endoplasmic reticulum membrane [GO:0005789]	dolichyl-phosphate-mannose-protein mannosyltransferase activity [GO:0004169]
J9VZL6	WT:uggt	TRUE	0.7	0.425537	23.4965	23.372	-0.12449	0	0.917329	CNAG_01918		Cytoskeletal regulatory protein binding protein	establishment of cell polarity [GO:0030010]	cell tip [GO:0051286]; cytoplasm [GO:0005737]	cytoskeletal regulatory protein binding [GO:0005519]
J9VYR2	WT:uggt	TRUE	0.7	0.152599	22.7437	15.7461	-6.99765	0	0.00782523	CNAG_01590		Large ribosomal subunit protein bL32m	translation [GO:0006412]	mitochondrial large ribosomal subunit [GO:0005762]	structural constituent of ribosome [GO:0003735]
J9VXF4	WT:uggt	TRUE	0.7	0.835251	11.4851	11.3432	-0.141957	0	0.906289	CNAG_01895		COQ9 domain-containing protein
J9VIF2	WT:uggt	TRUE	1	0.967417	14.7648	14.5363	-0.228519	0	0.853511	CNAG_04961		Orotidine 5'-phosphate decarboxylase (EC 4.1.1.23)	'de novo' pyrimidine nucleobase biosynthetic process [GO:0006207]; 'de novo' UMP biosynthetic process [GO:0044205]		orotate phosphoribosyltransferase activity [GO:0004588]; orotidine-5'-phosphate decarboxylase activity [GO:0004590]
J9VVA0	WT:uggt	TRUE	0.2	0.105538	22.7602	20.8715	-1.88875	0	0.270042	CNAG_02180		Phosphate transporter	phosphate ion transport [GO:0006817]; polyphosphate metabolic process [GO:0006797]	membrane [GO:0016020]	phosphate transmembrane transporter activity [GO:0005315]
J9VR38	WT:uggt	TRUE	0.2	0.0955358	11.3401	17.4991	6.15901	0	71.4575	CNAG_04162		AGC/PKA protein kinase	signal transduction [GO:0007165]	cAMP-dependent protein kinase complex [GO:0005952]; cytosol [GO:0005829]	ATP binding [GO:0005524]; cAMP-dependent protein kinase activity [GO:0004691]
J9W404	WT:uggt	TRUE	0.1	0.151172	19.588	20.2536	0.665649	0	1.58628	CNAG_05509		Imidazoleglycerol-phosphate dehydratase (EC 4.2.1.19)	amino acid biosynthetic process [GO:0008652]; histidine biosynthetic process [GO:0000105]		imidazoleglycerol-phosphate dehydratase activity [GO:0004424]
J9VSI6	WT:uggt	TRUE	0.1	0.120815	28.677	27.8841	-0.792865	0	0.577197	CNAG_04514		Mitogen-activated protein kinase (EC 2.7.11.24)		cytoplasm [GO:0005737]; nucleus [GO:0005634]	ATP binding [GO:0005524]; MAP kinase activity [GO:0004707]
J9VGU6	WT:uggt	TRUE	0.4	0.248577	11.4472	11.0093	-0.437833	0	0.738243	CNAG_03076		Uncharacterized protein
J9VQ44	WT:uggt	TRUE	0.4	0.569381	11.4936	11.1565	-0.337059	0	0.791653	CNAG_07418		Defective in cullin neddylation protein	protein neddylation [GO:0045116]	ubiquitin ligase complex [GO:0000151]	cullin family protein binding [GO:0097602]; ubiquitin conjugating enzyme binding [GO:0031624]; ubiquitin-like protein binding [GO:0032182]
J9VH37	WT:uggt	TRUE	1	0.813932	11.4038	11.2399	-0.163973	0	0.892564	CNAG_03968		Polyadenylate-binding protein 2		cytoplasm [GO:0005737]; nucleus [GO:0005634]	poly(A) binding [GO:0008143]
J9VKR5	WT:uggt	TRUE	1	0.478537	23.7159	23.2242	-0.491698	0	0.711188	CNAG_03699		Pre-mRNA-processing ATP-dependent RNA helicase PRP5 (EC 3.6.4.13) (Pre-mRNA-processing ATP-dependent RNA helicase prp5)			ATP binding [GO:0005524]; hydrolase activity [GO:0016787]; RNA binding [GO:0003723]; RNA helicase activity [GO:0003724]
J9VRE2	WT:uggt	TRUE	1	0.663399	30.7743	30.6913	-0.083073	0	0.944045	CNAG_06666		Alpha-1,4 glucan phosphorylase (EC 2.4.1.1)	glycogen catabolic process [GO:0005980]	cytoplasm [GO:0005737]	glycogen phosphorylase activity [GO:0008184]; linear malto-oligosaccharide phosphorylase activity [GO:0102250]; pyridoxal phosphate binding [GO:0030170]; SHG alpha-glucan phosphorylase activity [GO:0102499]
J9VV27	WT:uggt	TRUE	0.4	0.775792	18.8885	20.7508	1.86226	0	3.63576	CNAG_07164	AIM25	Phospholipid scramblase		plasma membrane [GO:0005886]	phospholipid scramblase activity [GO:0017128]
J9VM01	WT:uggt	TRUE	0.7	0.481778	15.2396	18.9169	3.6773	0	12.7931	CNAG_03070		Compass component swd2		Set1C/COMPASS complex [GO:0048188]	chromatin binding [GO:0003682]
J9VWL9	WT:uggt	TRUE	0.4	0.132619	18.2862	11.3682	-6.91798	0	0.0082695	CNAG_05781		Dynein light chain	microtubule-based process [GO:0007017]	cytoplasm [GO:0005737]; cytoplasmic dynein complex [GO:0005868]; microtubule [GO:0005874]	dynein intermediate chain binding [GO:0045505]
J9VTP6	WT:uggt	TRUE	0.7	0.900365	18.4993	17.8993	-0.599944	0	0.659779	CNAG_07593		BZIP domain-containing protein			DNA-binding transcription factor activity [GO:0003700]
J9VS98	WT:uggt	TRUE	0.7	0.505431	19.7512	15.6044	-4.14679	0	0.0564538	CNAG_04407		Dynein intermediate chain, cytosolic	transport along microtubule [GO:0010970]	cytoplasmic dynein complex [GO:0005868]	dynein heavy chain binding [GO:0045504]; dynein light chain binding [GO:0045503]
J9VQY2	WT:uggt	TRUE	0.2	0.0987232	19.1056	11.1302	-7.97547	0	0.00397324	CNAG_04142		Tartrate transporter		membrane [GO:0016020]	transmembrane transporter activity [GO:0022857]
J9VRI8	WT:uggt	TRUE	0.4	0.249627	23.4921	23.1193	-0.372776	0	0.772295	CNAG_05688		V-type proton ATPase subunit F		fungal-type vacuole membrane [GO:0000329]; proton-transporting V-type ATPase, V1 domain [GO:0033180]	proton-transporting ATPase activity, rotational mechanism [GO:0046961]
J9VKN2	WT:uggt	TRUE	1	0.558087	15.2658	18.3013	3.03554	0	8.19951	CNAG_02708		Prenylcysteine oxidase/farnesylcysteine lyase	prenylated protein catabolic process [GO:0030327]; prenylcysteine catabolic process [GO:0030328]		lyase activity [GO:0016829]; prenylcysteine oxidase activity [GO:0001735]
J9VQL7	WT:uggt	TRUE	0.1	0.285963	19.1467	24.1649	5.01821	0	32.4064	CNAG_03332		Replication factor C subunit 2/4	DNA clamp unloading [GO:0090618]; DNA repair [GO:0006281]; DNA strand elongation involved in DNA replication [GO:0006271]	Ctf18 RFC-like complex [GO:0031390]; DNA replication factor C complex [GO:0005663]; Elg1 RFC-like complex [GO:0031391]; Rad17 RFC-like complex [GO:0031389]	ATP binding [GO:0005524]; ATP hydrolysis activity [GO:0016887]; DNA binding [GO:0003677]; DNA clamp loader activity [GO:0003689]
J9VRZ6	WT:uggt	TRUE	0.4	0.125616	22.3067	15.2098	-7.09687	0	0.00730514	CNAG_04528		Uncharacterized protein
J9VQM4	WT:uggt	TRUE	0.2	0.237978	22.9434	23.675	0.731578	0	1.66045	CNAG_03343		Translin	RNA metabolic process [GO:0016070]	cytoplasm [GO:0005737]; nucleus [GO:0005634]	RNA binding [GO:0003723]; sequence-specific DNA binding [GO:0043565]; single-stranded DNA binding [GO:0003697]
J9VQT9	WT:uggt	TRUE	0.7	0.327125	23.9532	23.6885	-0.264717	0	0.832362	CNAG_01189		DNA-directed RNA polymerase subunit (EC 2.7.7.6)		RNA polymerase I complex [GO:0005736]	DNA binding [GO:0003677]; RNA polymerase I activity [GO:0001054]
J9VZD0	WT:uggt	TRUE	1	0.935685	24.4737	24.4633	-0.0104129	0	0.992808	CNAG_05384		CDP-diacylglycerol-inositol 3-phosphatidyltransferase	phosphatidylinositol biosynthetic process [GO:0006661]	Golgi apparatus [GO:0005794]; membrane [GO:0016020]	CDP-diacylglycerol-inositol 3-phosphatidyltransferase activity [GO:0003881]
J9VYM9	WT:uggt	TRUE	0.1	0.109107	21.0743	14.6013	-6.47298	0	0.0112574	CNAG_01554		Sorting nexin-4 (Autophagy-related protein 24)	endocytic recycling [GO:0032456]; piecemeal microautophagy of the nucleus [GO:0034727]; protein transport [GO:0015031]; reticulophagy [GO:0061709]	early endosome [GO:0005769]; membrane [GO:0016020]; phagophore assembly site [GO:0000407]	phosphatidylinositol binding [GO:0035091]
T2BQM8	WT:uggt	TRUE	0.7	0.424776	22.272	19.0999	-3.1721	0	0.110944	CNAG_00732		BZIP domain-containing protein			DNA-binding transcription factor activity [GO:0003700]
J9VM11	WT:uggt	TRUE	0.1	0.0141232	20.921	21.6545	0.733528	0	1.6627	CNAG_03061		Multiple drug resistance protein	xenobiotic detoxification by transmembrane export across the plasma membrane [GO:1990961]	plasma membrane [GO:0005886]	sodium:proton antiporter activity [GO:0015385]
J9VGN1	WT:uggt	TRUE	0.2	0.265064	25.8228	25.3279	-0.494857	0	0.709632	CNAG_00361		BAR-domain-containing protein	actin cortical patch localization [GO:0051666]; endocytosis [GO:0006897]; plasma membrane tubulation [GO:0097320]	actin cortical patch [GO:0030479]; mating projection tip [GO:0043332]; medial cortex [GO:0031097]; Rvs161p-Rvs167p complex [GO:1990528]	lipid binding [GO:0008289]
J9VMC5	WT:uggt	TRUE	0.7	0.98391	25.5908	25.5985	0.00769396	0	1.00535	CNAG_07628	NIP1	Eukaryotic translation initiation factor 3 subunit C (eIF3c) (Eukaryotic translation initiation factor 3 93 kDa subunit homolog) (eIF3 p93) (Translation initiation factor eIF3, p93 subunit homolog)	formation of cytoplasmic translation initiation complex [GO:0001732]	eukaryotic 43S preinitiation complex [GO:0016282]; eukaryotic 48S preinitiation complex [GO:0033290]; eukaryotic translation initiation factor 3 complex [GO:0005852]	RNA binding [GO:0003723]; translation initiation factor activity [GO:0003743]; translation initiation factor binding [GO:0031369]
J9VGG9	WT:uggt	TRUE	0.7	0.348108	14.5655	11.3341	-3.23145	0	0.106472	CNAG_03977		Afadin and alpha-actinin-binding-domain-containing protein
J9VIC1	WT:uggt	TRUE	0.7	0.405591	11.607	11.9056	0.298602	0	1.22995	CNAG_07793		Fungal-type protein kinase domain-containing protein
J9VX92	WT:uggt	TRUE	1	0.910039	11.6508	11.6041	-0.0467104	0	0.968141	CNAG_01810		DNA-directed RNA polymerase subunit	termination of RNA polymerase I transcription [GO:0006363]	RNA polymerase I complex [GO:0005736]	nucleic acid binding [GO:0003676]; RNA polymerase I activity [GO:0001054]; zinc ion binding [GO:0008270]
J9VN58	WT:uggt	TRUE	0.4	0.283735	11.724	11.1753	-0.548652	0	0.683658	CNAG_02126		DUF1748-domain-containing protein		cytoplasm [GO:0005737]
J9VMP7	WT:uggt	TRUE	0.2	0.0858719	28.4498	27.9629	-0.48686	0	0.713576	CNAG_00809		RNA helicase (EC 3.6.4.13)	cell differentiation [GO:0030154]	cytoplasm [GO:0005737]; nucleus [GO:0005634]	ATP binding [GO:0005524]; hydrolase activity [GO:0016787]; RNA binding [GO:0003723]; RNA helicase activity [GO:0003724]; translation initiation factor activity [GO:0003743]
J9W3R3	WT:uggt	TRUE	0.4	0.143514	18.5686	13.7513	-4.81729	0	0.0354691	CNAG_05422		BRCT domain-containing protein
J9VK01	WT:uggt	TRUE	0.1	0.00851279	24.4902	24.9335	0.44335	0	1.35976	CNAG_01348	CYN1	Cyanate hydratase (Cyanase) (EC 4.2.1.104) (Cyanate hydrolase) (Cyanate lyase)	cyanate metabolic process [GO:0009439]		cyanate hydratase activity [GO:0008824]; DNA binding [GO:0003677]
J9VUC1	WT:uggt	TRUE	0.1	0.197842	25.1696	24.4511	-0.718516	0	0.607722	CNAG_05889		SH3 domain-containing protein	actin cortical patch localization [GO:0051666]; actin filament bundle assembly [GO:0051017]	actin cortical patch [GO:0030479]	actin filament binding [GO:0051015]; phosphatidylinositol binding [GO:0035091]
J9VRZ2	WT:uggt	TRUE	0.1	0.114478	23.2266	16.0968	-7.12979	0	0.00714037	CNAG_04292		Large ribosomal subunit protein uL29m (54S ribosomal protein L4, mitochondrial)	mitochondrial translation [GO:0032543]	mitochondrial large ribosomal subunit [GO:0005762]	structural constituent of ribosome [GO:0003735]
J9VZ46	WT:uggt	TRUE	0.1	0.0695095	24.1402	14.9408	-9.19943	0	0.00170096	CNAG_07598		Importin-alpha export receptor	protein export from nucleus [GO:0006611]; protein import into nucleus [GO:0006606]	cytosol [GO:0005829]; nuclear envelope [GO:0005635]	nuclear export signal receptor activity [GO:0005049]; small GTPase binding [GO:0031267]
J9VFS3	WT:uggt	TRUE	0.7	0.195974	22.3252	23.924	1.59881	0	3.02894	CNAG_00787		Uncharacterized protein	Golgi vesicle transport [GO:0048193]; protein transport [GO:0015031]	endomembrane system [GO:0012505]
J9VR75	WT:uggt	TRUE	0.4	0.914246	18.0275	17.4825	-0.54494	0	0.68542	CNAG_01023		Cohesin complex subunit SCC1	mitotic sister chromatid cohesion [GO:0007064]; replication-born double-strand break repair via sister chromatid exchange [GO:1990414]	cohesin complex [GO:0008278]; nucleus [GO:0005634]	chromatin binding [GO:0003682]
J9VXZ9	WT:uggt	TRUE	0.4	0.229971	20.6904	21.693	1.00255	0	2.00353	CNAG_04735		Extracellular metalloproteinase (EC 3.4.24.-) (Fungalysin)	proteolysis [GO:0006508]	extracellular space [GO:0005615]	metalloendopeptidase activity [GO:0004222]; zinc ion binding [GO:0008270]
J9VJ28	WT:uggt	TRUE	0.4	0.116271	21.6386	15.2283	-6.41032	0	0.0117571	CNAG_00472		Uncharacterized protein
J9VNT4	WT:uggt	TRUE	0.4	0.552406	17.1241	20.6235	3.49938	0	11.3088	CNAG_05818	CHS5	Chitin synthase 5 (EC 2.4.1.16)	cell wall organization [GO:0071555]; fungal-type cell wall chitin biosynthetic process [GO:0034221]	cell septum [GO:0030428]; myosin complex [GO:0016459]; plasma membrane [GO:0005886]	actin binding [GO:0003779]; ATP binding [GO:0005524]; chitin synthase activity [GO:0004100]; cytoskeletal motor activity [GO:0003774]
J9VPZ5	WT:uggt	TRUE	0.1	0.0653468	24.743	24.1535	-0.589517	0	0.664566	CNAG_02917		Mitochondrial carrier		membrane [GO:0016020]; mitochondrion [GO:0005739]	guanine nucleotide transmembrane transporter activity [GO:0001409]
T2BNQ3	WT:uggt	TRUE	0.4	0.48032	22.8053	22.4767	-0.328623	0	0.796296	CNAG_01055		Phospholipid transporter, variant		membrane [GO:0016020]	transmembrane transporter activity [GO:0022857]
J9VWE7	WT:uggt	TRUE	0.7	0.455256	11.7585	11.3689	-0.389575	0	0.763354	CNAG_04177		COP9 signalosome complex subunit 7		COP9 signalosome [GO:0008180]
J9VHK8	WT:uggt	TRUE	0.1	0.0623635	25.592	24.9169	-0.675043	0	0.626314	CNAG_00741		RNA helicase (EC 3.6.4.13)	mRNA export from nucleus [GO:0006406]; mRNA splicing, via spliceosome [GO:0000398]		ATP binding [GO:0005524]; hydrolase activity [GO:0016787]; RNA binding [GO:0003723]; RNA helicase activity [GO:0003724]
J9VIC8	WT:uggt	TRUE	0.4	0.123195	22.8212	15.6459	-7.17538	0	0.00691825	CNAG_07339		Adipose-regulatory protein	lipid droplet formation [GO:0140042]; lipid metabolic process [GO:0006629]	endoplasmic reticulum membrane [GO:0005789]
J9VU61	WT:uggt	TRUE	1	0.951088	14.9335	14.6158	-0.31763	0	0.802387	CNAG_01604		TIGR01458 family HAD hydrolase			alkaline phosphatase activity [GO:0004035]; phosphoglycolate phosphatase activity [GO:0008967]
J9VJK2	WT:uggt	TRUE	0.2	0.10091	25.1496	23.2274	-1.92221	0	0.26385	CNAG_00665		DNA topoisomerase 2-associated protein PAT1	deadenylation-dependent decapping of nuclear-transcribed mRNA [GO:0000290]; P-body assembly [GO:0033962]	P-body [GO:0000932]	isomerase activity [GO:0016853]; RNA binding [GO:0003723]
J9VMA6	WT:uggt	TRUE	0.1	0.0627704	26.4056	24.182	-2.22359	0	0.214108	CNAG_02213		Epsin	actin filament organization [GO:0007015]; endocytosis [GO:0006897]	clathrin vesicle coat [GO:0030125]; endosome [GO:0005768]; plasma membrane [GO:0005886]	clathrin binding [GO:0030276]; phospholipid binding [GO:0005543]
J9VGY2	WT:uggt	TRUE	1	0.742442	23.2484	23.0845	-0.163977	0	0.892561	CNAG_03025		V-type H-transporting ATPase subunit D	vacuolar acidification [GO:0007035]	fungal-type vacuole membrane [GO:0000329]; vacuolar proton-transporting V-type ATPase complex [GO:0016471]	proton-transporting ATPase activity, rotational mechanism [GO:0046961]
J9W2K7	WT:uggt	TRUE	0.1	0.325359	26.9982	21.6782	-5.32003	0	0.0250329	CNAG_06144		Translationally-controlled tumor protein homolog		cytoplasm [GO:0005737]	calcium ion binding [GO:0005509]
J9VG62	WT:uggt	TRUE	1	0.807477	21.8284	21.9746	0.146211	0	1.10666	CNAG_03604		mRNA 3'-end-processing protein	mRNA 3'-end processing [GO:0031124]	mRNA cleavage and polyadenylation specificity factor complex [GO:0005847]	RNA binding [GO:0003723]; zinc ion binding [GO:0008270]
J9VXP6	WT:uggt	TRUE	0.2	0.0899292	18.0604	11.1037	-6.95664	0	0.00805087	CNAG_01997		Prephenate dehydrogenase [NADP(+)] (PRDH) (EC 1.3.1.13)	tyrosine biosynthetic process [GO:0006571]		NAD+ binding [GO:0070403]; prephenate dehydrogenase (NAD+) activity [GO:0008977]; prephenate dehydrogenase (NADP+) activity [GO:0004665]
J9VKZ5	WT:uggt	TRUE	0.1	0.0357161	21.2269	21.8658	0.638955	0	1.5572	CNAG_07029		Synaptobrevin homolog YKT6	exocytosis [GO:0006887]; vesicle fusion [GO:0006906]	intracellular membrane-bounded organelle [GO:0043231]; SNARE complex [GO:0031201]	SNAP receptor activity [GO:0005484]; SNARE binding [GO:0000149]
J9VQ46	WT:uggt	TRUE	1	0.731631	26.4242	26.3329	-0.0912873	0	0.938685	CNAG_02301		Lupus La protein	tRNA processing [GO:0008033]	nucleus [GO:0005634]; ribonucleoprotein complex [GO:1990904]	mRNA binding [GO:0003729]
J9VKQ8	WT:uggt	TRUE	0.1	0.139678	21.6748	21.1578	-0.516961	0	0.698842	CNAG_00133		Transcriptional coactivator p15 (PC4) C-terminal domain-containing protein	positive regulation of transcription initiation by RNA polymerase II [GO:0060261]	nucleus [GO:0005634]; transcription regulator complex [GO:0005667]	DNA binding [GO:0003677]; transcription coactivator activity [GO:0003713]
J9W458	WT:uggt	TRUE	0.7	0.52487	18.5985	21.1826	2.58417	0	5.99669	CNAG_05588		START domain-containing protein		membrane [GO:0016020]	lipid binding [GO:0008289]
T2BQU2	WT:uggt	TRUE	0.2	0.114509	27.2835	26.7765	-0.506963	0	0.703702	CNAG_03863		Protein arginine N-methyltransferase 1, variant	methylation [GO:0032259]	nucleus [GO:0005634]	protein-arginine N-methyltransferase activity [GO:0016274]
J9VQP1	WT:uggt	TRUE	0.1	0.000730012	26.0796	26.7853	0.705643	0	1.63087	CNAG_02677		Cytoplasmic protein	cytoplasmic translation [GO:0002181]	cytosol [GO:0005829]	metal ion binding [GO:0046872]; mRNA binding [GO:0003729]
J9VIF7	WT:uggt	TRUE	0.4	0.347292	28.7385	26.3494	-2.38907	0	0.190905	CNAG_02726		Cytoplasmic protein
J9VFN7	WT:uggt	TRUE	0.7	0.147364	23.221	15.4465	-7.77449	0	0.00456716	CNAG_03672		Trafficking protein particle complex subunit	endoplasmic reticulum to Golgi vesicle-mediated transport [GO:0006888]	endoplasmic reticulum [GO:0005783]; TRAPPI protein complex [GO:1990070]; TRAPPII protein complex [GO:1990071]; TRAPPIII protein complex [GO:1990072]
J9VX38	WT:uggt	TRUE	0.7	0.911885	26.3273	26.2634	-0.0639016	0	0.956673	CNAG_01744	HAD1	Probable phosphatase HAD1 (EC 3.1.3.-)			2-deoxyglucose-6-phosphatase activity [GO:0003850]; beta-phosphoglucomutase activity [GO:0008801]; glycerol-3-phosphatase activity [GO:0043136]; metal ion binding [GO:0046872]
J9VXS5	WT:uggt	TRUE	0.1	0.0117089	23.8005	23.1498	-0.650657	0	0.63699	CNAG_03285		DM2 domain-containing protein	regulation of transcription by RNA polymerase II [GO:0006357]	SWI/SNF complex [GO:0016514]	transcription coregulator activity [GO:0003712]
J9W164	WT:uggt	TRUE	0.1	0.0529444	19.9441	13.7284	-6.2157	0	0.0134551	CNAG_06499		Phosphatidic acid phosphatase type 2/haloperoxidase domain-containing protein	phospholipid dephosphorylation [GO:0046839]; phospholipid metabolic process [GO:0006644]	membrane [GO:0016020]	phosphatidate phosphatase activity [GO:0008195]
J9VJH4	WT:uggt	TRUE	0.1	0.217196	25.8192	19.8302	-5.98895	0	0.0157451	CNAG_04071		Proteasome subunit alpha type	proteasomal protein catabolic process [GO:0010498]; ubiquitin-dependent protein catabolic process [GO:0006511]	cytoplasm [GO:0005737]; nucleus [GO:0005634]; proteasome core complex, alpha-subunit complex [GO:0019773]
J9VHE0	WT:uggt	TRUE	0.7	0.472429	21.7748	18.6153	-3.15945	0	0.111921	CNAG_00667		Uncharacterized protein
J9VPG3	WT:uggt	TRUE	0.7	0.252447	20.9261	19.8545	-1.07155	0	0.475808	CNAG_05219		Uncharacterized protein		Cdc73/Paf1 complex [GO:0016593]
J9VQB3	WT:uggt	TRUE	0.1	0.153827	25.8902	18.7946	-7.09553	0	0.00731193	CNAG_03196	URA5	Orotate phosphoribosyltransferase (OPRT) (OPRTase) (EC 2.4.2.10)	'de novo' pyrimidine nucleobase biosynthetic process [GO:0006207]; 'de novo' UMP biosynthetic process [GO:0044205]; pyrimidine ribonucleoside biosynthetic process [GO:0046132]	cytoplasm [GO:0005737]	orotate phosphoribosyltransferase activity [GO:0004588]
J9VXZ6	WT:uggt	TRUE	0.4	0.275663	23.9834	24.5764	0.593023	0	1.5084	CNAG_03360		Uncharacterized protein
J9VGI4	WT:uggt	TRUE	0.1	0.168323	26.4779	19.5773	-6.90056	0	0.00836997	CNAG_03753		Dolichol-phosphate mannosyltransferase subunit 1 (EC 2.4.1.83)	dolichol-linked oligosaccharide biosynthetic process [GO:0006488]; GPI anchor biosynthetic process [GO:0006506]; protein O-linked mannosylation [GO:0035269]	endoplasmic reticulum membrane [GO:0005789]	dolichyl-phosphate beta-D-mannosyltransferase activity [GO:0004582]
J9VN32	WT:uggt	TRUE	1	0.379556	23.2991	19.1977	-4.10138	0	0.0582588	CNAG_03597		CSC1/OSCA1-like 7TM region domain-containing protein		plasma membrane [GO:0005886]	calcium-activated cation channel activity [GO:0005227]
J9VSR7	WT:uggt	TRUE	0.7	0.83932	23.8343	23.7153	-0.119061	0	0.920787	CNAG_04902		SEL1 protein	ERAD pathway [GO:0036503]	endoplasmic reticulum membrane [GO:0005789]
J9VLC3	WT:uggt	TRUE	0.7	0.123562	22.1567	14.696	-7.46064	0	0.00567708	CNAG_01098		Pre-rRNA-processing protein	rRNA processing [GO:0006364]	MLL1 complex [GO:0071339]; rixosome complex [GO:0120330]
J9VZ65	WT:uggt	TRUE	0.7	0.841731	15.4057	14.3601	-1.04559	0	0.484445	CNAG_01721		hydroxymethylbilane synthase (EC 2.5.1.61) (Hydroxymethylbilane synthase)	heme biosynthetic process [GO:0006783]	cytoplasm [GO:0005737]	hydroxymethylbilane synthase activity [GO:0004418]
J9VM95	WT:uggt	TRUE	1	0.413565	23.82	19.6951	-4.12487	0	0.057318	CNAG_02467		MMS19 nucleotide excision repair protein	DNA repair [GO:0006281]; iron-sulfur cluster assembly [GO:0016226]; protein maturation by iron-sulfur cluster transfer [GO:0097428]	CIA complex [GO:0097361]; MMXD complex [GO:0071817]; nucleus [GO:0005634]
J9VNG8	WT:uggt	TRUE	1	0.998992	17.3053	17.3	-0.00524619	0	0.99637	CNAG_01187		Ribosome production factor 2 homolog (Ribosome biogenesis protein RPF2 homolog)	maturation of LSU-rRNA from tricistronic rRNA transcript (SSU-rRNA, 5.8S rRNA, LSU-rRNA) [GO:0000463]	nucleolus [GO:0005730]	rRNA binding [GO:0019843]
J9W1J6	WT:uggt	TRUE	1	0.868757	11.1252	10.9859	-0.139308	0	0.907955	CNAG_01743		Uncharacterized protein
J9VVG9	WT:uggt	TRUE	0.7	0.416592	26.2425	25.6141	-0.628454	0	0.646869	CNAG_02104		Phosphatidylinositol transfer protein SFH5 (PITP SFH5)	Golgi to plasma membrane protein transport [GO:0043001]; regulation of exocytosis [GO:0017157]	cortical endoplasmic reticulum [GO:0032541]; cytosol [GO:0005829]; endoplasmic reticulum membrane [GO:0005789]; plasma membrane [GO:0005886]	metal ion binding [GO:0046872]; phosphatidylinositol transfer activity [GO:0008526]
J9VDP9	WT:uggt	TRUE	0.7	0.414692	24.6361	24.101	-0.535015	0	0.690152	CNAG_00020		High-temperature-induced dauer-formation protein		Golgi medial cisterna [GO:0005797]; Golgi trans cisterna [GO:0000138]; membrane [GO:0016020]
J9VLS8	WT:uggt	TRUE	0.1	0.00416674	25.8408	25.1798	-0.660949	0	0.632462	CNAG_00524		Acetyl-CoA acyltransferase 2		mitochondrion [GO:0005739]	acetyl-CoA C-acyltransferase activity [GO:0003988]
J9VJM7	WT:uggt	TRUE	0.7	0.523063	11.0596	11.4075	0.347942	0	1.27274	CNAG_06812		Phospholipase (EC 3.1.4.4)	intracellular signal transduction [GO:0035556]; phosphatidic acid biosynthetic process [GO:0006654]; phospholipid catabolic process [GO:0009395]; regulation of vesicle-mediated transport [GO:0060627]	intracellular membrane-bounded organelle [GO:0043231]; plasma membrane [GO:0005886]	N-acylphosphatidylethanolamine-specific phospholipase D activity [GO:0070290]; phosphatidylinositol binding [GO:0035091]; phospholipase D activity [GO:0004630]
J9W327	WT:uggt	TRUE	0.1	0.260012	15.1389	11.2132	-3.92572	0	0.0658023	CNAG_06332		Uncharacterized protein
J9W393	WT:uggt	TRUE	0.4	0.44711	11.3417	11.791	0.449288	0	1.36537	CNAG_06417		AP complex subunit sigma	clathrin-dependent endocytosis [GO:0072583]; intracellular protein transport [GO:0006886]	AP-2 adaptor complex [GO:0030122]	clathrin adaptor activity [GO:0035615]
J9VD54	WT:uggt	TRUE	0.2	0.355142	27.6315	22.1436	-5.48784	0	0.0222841	CNAG_00075		CsbD-like domain-containing protein
J9VW54	WT:uggt	TRUE	0.1	0.0432389	26.7972	25.8733	-0.923911	0	0.527078	CNAG_06475		RNA polymerase II degradation factor 1		cytoplasm [GO:0005737]; nucleus [GO:0005634]	ubiquitin binding [GO:0043130]
J9VSI7	WT:uggt	TRUE	0.7	0.399921	22.873	19.473	-3.40007	0	0.0947276	CNAG_04828		Histone H3		nucleosome [GO:0000786]; nucleus [GO:0005634]	DNA binding [GO:0003677]; protein heterodimerization activity [GO:0046982]; structural constituent of chromatin [GO:0030527]
J9VTZ0	WT:uggt	TRUE	1	0.966033	22.8287	22.8199	-0.00877626	0	0.993935	CNAG_00929		Caffeine-induced death protein 2		mitochondrial intermembrane space [GO:0005758]
J9VDA7	WT:uggt	TRUE	1	0.960952	14.3447	14.6036	0.258932	0	1.19659	CNAG_00135		Cyclophilin			RNA binding [GO:0003723]
J9VKK2	WT:uggt	TRUE	0.7	0.31834	26.8938	26.0625	-0.831354	0	0.562002	CNAG_01153		Small subunit ribosomal protein S13e	translation [GO:0006412]	cytosolic small ribosomal subunit [GO:0022627]; nucleolus [GO:0005730]	small ribosomal subunit rRNA binding [GO:0070181]; structural constituent of ribosome [GO:0003735]
J9VK40	WT:uggt	TRUE	0.2	0.153728	25.3265	24.9209	-0.405576	0	0.754935	CNAG_02885		Capsular associated protein		membrane [GO:0016020]
J9VL44	WT:uggt	TRUE	0.2	0.139676	26.3137	25.6718	-0.641938	0	0.640852	CNAG_01185		Hsp70-like protein		endoplasmic reticulum [GO:0005783]	adenyl-nucleotide exchange factor activity [GO:0000774]
J9VGG8	WT:uggt	TRUE	0.1	0.0308675	21.8134	21.4137	-0.399689	0	0.758022	CNAG_03738		Pantetheine-phosphate adenylyltransferase	coenzyme A biosynthetic process [GO:0015937]		dephospho-CoA kinase activity [GO:0004140]; pantetheine-phosphate adenylyltransferase activity [GO:0004595]
J9VJJ3	WT:uggt	TRUE	0.7	0.44256	22.4284	22.7689	0.340577	0	1.26626	CNAG_05113		Aldehyde dehydrogenase (NAD )			phenylacetaldehyde dehydrogenase activity [GO:0008957]
J9VN88	WT:uggt	TRUE	0.4	0.151064	16.9288	11.3933	-5.53545	0	0.0215607	CNAG_06627		Pre-mRNA-processing factor 40	mRNA cis splicing, via spliceosome [GO:0045292]	U1 snRNP [GO:0005685]; U2-type prespliceosome [GO:0071004]	RNA binding [GO:0003723]
J9VUQ8	WT:uggt	TRUE	0.4	0.232369	25.7039	26.1114	0.407438	0	1.32633	CNAG_07769		HECT-type E3 ubiquitin transferase (EC 2.3.2.26)	base-excision repair [GO:0006284]; Golgi organization [GO:0007030]; membrane fusion [GO:0061025]; protein polyubiquitination [GO:0000209]	Golgi membrane [GO:0000139]; nucleus [GO:0005634]	ubiquitin protein ligase activity [GO:0061630]
J9VF51	WT:uggt	TRUE	0.7	0.231359	25.0889	24.2922	-0.79663	0	0.575692	CNAG_00583		Uncharacterized protein		membrane [GO:0016020]
J9VPB7	WT:uggt	TRUE	0.7	0.593528	20.1517	17.9074	-2.24431	0	0.211055	CNAG_05154		Membrane fraction protein	intracellular manganese ion homeostasis [GO:0030026]; intracellular sequestering of iron ion [GO:0006880]	fungal-type vacuole membrane [GO:0000329]	iron ion transmembrane transporter activity [GO:0005381]; manganese ion transmembrane transporter activity [GO:0005384]
J9W2B5	WT:uggt	TRUE	0.1	0.0773718	25.5316	15.2364	-10.2952	0	0.000795861	CNAG_06026		Aspartate aminotransferase (EC 2.6.1.1)	aspartate catabolic process [GO:0006533]; L-phenylalanine biosynthetic process from chorismate via phenylpyruvate [GO:0033585]	cytosol [GO:0005829]; mitochondrion [GO:0005739]	identical protein binding [GO:0042802]; L-aspartate:2-oxoglutarate aminotransferase activity [GO:0004069]; L-tyrosine:2-oxoglutarate aminotransferase activity [GO:0004838]; pyridoxal phosphate binding [GO:0030170]
J9VK28	WT:uggt	TRUE	0.1	0.0727354	26.8919	15.2174	-11.6744	0	0.000305947	CNAG_00808		Myosin regulatory light chain cdc4	mitotic actomyosin contractile ring assembly [GO:1903475]	myosin II complex [GO:0016460]	calcium ion binding [GO:0005509]; myosin heavy chain binding [GO:0032036]
J9VK77	WT:uggt	TRUE	0.4	0.521236	23.1561	23.4494	0.293336	0	1.22547	CNAG_06834		Dolichyl-phosphate-mannose--protein mannosyltransferase (EC 2.4.1.109)		endoplasmic reticulum membrane [GO:0005789]	dolichyl-phosphate-mannose-protein mannosyltransferase activity [GO:0004169]
J9VMQ5	WT:uggt	TRUE	0.1	0.31235	17.8312	21.6489	3.81766	0	14.1004	CNAG_02057		Uncharacterized protein			nickel cation binding [GO:0016151]
J9VV69	WT:uggt	TRUE	0.4	0.315037	23.6714	24.112	0.440651	0	1.35722	CNAG_06141		Deoxyuridine 5'-triphosphate nucleotidohydrolase (dUTPase) (EC 3.6.1.23) (dUTP pyrophosphatase)	dUMP biosynthetic process [GO:0006226]; dUTP catabolic process [GO:0046081]		dUTP diphosphatase activity [GO:0004170]; magnesium ion binding [GO:0000287]
J9VQL5	WT:uggt	TRUE	0.7	0.12212	21.3217	14.7844	-6.53737	0	0.0107661	CNAG_02108		GTPase activating protein
J9VNW2	WT:uggt	TRUE	1	0.495307	25.5282	25.832	0.303831	0	1.23442	CNAG_06628		Aldehyde dehydrogenase (NAD )			phenylacetaldehyde dehydrogenase activity [GO:0008957]
J9VNY7	WT:uggt	TRUE	0.1	0.217764	26.375	25.2462	-1.12882	0	0.457289	CNAG_05878		Actin-related protein 2/3 complex subunit	Arp2/3 complex-mediated actin nucleation [GO:0034314]	actin cortical patch [GO:0030479]; Arp2/3 protein complex [GO:0005885]	actin filament binding [GO:0051015]
J9VIT0	WT:uggt	TRUE	0.1	0.00356595	21.6091	22.3451	0.735958	0	1.6655	CNAG_03820		Nucleolar protein 14	maturation of SSU-rRNA [GO:0030490]	Noc4p-Nop14p complex [GO:0030692]; nucleolus [GO:0005730]; small-subunit processome [GO:0032040]
J9VGM7	WT:uggt	TRUE	0.1	0.0832754	25.5863	15.5969	-9.98939	0	0.000983768	CNAG_00356		Survival factor 1	response to oxidative stress [GO:0006979]	cytoplasm [GO:0005737]
J9VIT4	WT:uggt	TRUE	0.7	0.507745	21.5085	18.9406	-2.56792	0	0.168647	CNAG_07356		Succinate dehydrogenase, cytochrome b556 subunit	mitochondrial electron transport, succinate to ubiquinone [GO:0006121]; tricarboxylic acid cycle [GO:0006099]	mitochondrial respiratory chain complex II, succinate dehydrogenase complex (ubiquinone) [GO:0005749]; plasma membrane [GO:0005886]	electron transfer activity [GO:0009055]; metal ion binding [GO:0046872]
J9VK30	WT:uggt	TRUE	0.7	0.259709	22.951	23.6622	0.711283	0	1.63726	CNAG_02895		Dynamin GTPase	defense response to virus [GO:0051607]; mitochondrial fusion [GO:0008053]	cytoplasm [GO:0005737]; membrane [GO:0016020]; microtubule [GO:0005874]; nucleus [GO:0005634]	GTP binding [GO:0005525]; GTPase activity [GO:0003924]; microtubule binding [GO:0008017]
J9VQA5	WT:uggt	TRUE	0.4	0.147171	19.1305	11.62	-7.51051	0	0.00548417	CNAG_03438		Hexose transporter		plasma membrane [GO:0005886]	carbohydrate:proton symporter activity [GO:0005351]
J9VD75	WT:uggt	TRUE	0.7	0.41948	27.5439	27.4907	-0.0532661	0	0.963752	CNAG_00100		Stress-induced-phosphoprotein 1		cytoplasm [GO:0005737]	Hsp90 protein binding [GO:0051879]
J9VUW7	WT:uggt	TRUE	0.1	0.356229	26.8991	21.7416	-5.15746	0	0.0280189	CNAG_03153	SEC14	Sec14 cytosolic factor
J9VNM2	WT:uggt	TRUE	0.7	0.348524	24.1593	19.7121	-4.4472	0	0.0458415	CNAG_04938		NmrA-like domain-containing protein		nucleus [GO:0005634]
J9VPS9	WT:uggt	TRUE	0.7	0.510755	18.0548	14.635	-3.41977	0	0.0934427	CNAG_03236		AMME syndrome candidate protein		nucleus [GO:0005634]
J9VP58	WT:uggt	TRUE	0.7	0.716428	20.7554	22.4482	1.6928	0	3.23283	CNAG_00909		Phosphopantothenoylcysteine decarboxylase	coenzyme A biosynthetic process [GO:0015937]	phosphopantothenoylcysteine decarboxylase complex [GO:0071513]	FMN binding [GO:0010181]; phosphopantothenoylcysteine decarboxylase activity [GO:0004633]
J9VGU3	WT:uggt	TRUE	1	0.917906	18.1264	18.7528	0.626362	0	1.54367	CNAG_00439		Importin N-terminal domain-containing protein	protein import into nucleus [GO:0006606]	cytoplasm [GO:0005737]; nucleus [GO:0005634]
J9VF01	WT:uggt	TRUE	0.7	0.5219	22.7975	19.7406	-3.05689	0	0.120167	CNAG_00531		Potassium/sodium efflux P-type ATPase, fungal-type	intracellular calcium ion homeostasis [GO:0006874]	plasma membrane [GO:0005886]	ATP binding [GO:0005524]; ATP hydrolysis activity [GO:0016887]; P-type potassium transmembrane transporter activity [GO:0008556]; P-type sodium transporter activity [GO:0008554]
J9VGZ7	WT:uggt	TRUE	0.7	0.792198	14.8791	16.5236	1.64454	0	3.12648	CNAG_03918		RAM signaling network component
J9VUC5	WT:uggt	TRUE	1	0.821132	24.2574	24.1585	-0.0989776	0	0.933694	CNAG_05894		Dynein heavy chain, cytoplasmic (Dynein heavy chain, cytosolic)	cytoplasmic microtubule organization [GO:0031122]; mitotic spindle organization [GO:0007052]; nuclear migration [GO:0007097]; retrograde axonal transport [GO:0008090]	cell cortex [GO:0005938]; cytoplasmic dynein complex [GO:0005868]; cytoplasmic microtubule [GO:0005881]	ATP binding [GO:0005524]; ATP hydrolysis activity [GO:0016887]; dynein intermediate chain binding [GO:0045505]; dynein light intermediate chain binding [GO:0051959]; minus-end-directed microtubule motor activity [GO:0008569]
J9VP61	WT:uggt	TRUE	0.7	0.174654	21.6498	14.7835	-6.86633	0	0.00857097	CNAG_03965		Ribosome recycling factor	cytoplasmic translational termination [GO:0002184]	cytosol [GO:0005829]; mitochondrion [GO:0005739]	ribosomal large subunit binding [GO:0043023]
J9VML2	WT:uggt	TRUE	0.2	0.106965	22.492	15.2918	-7.20014	0	0.00680051	CNAG_02096		Peroxisomal membrane protein PEX16	peroxisome organization [GO:0007031]	peroxisomal membrane [GO:0005778]
J9VNI4	WT:uggt	TRUE	0.7	0.144466	25.044	22.2872	-2.75674	0	0.147958	CNAG_06533		ATP-dependent permease		cytoplasmic vesicle membrane [GO:0030659]; plasma membrane [GO:0005886]	ABC-type transporter activity [GO:0140359]; ATP binding [GO:0005524]; ATP hydrolysis activity [GO:0016887]
J9VR51	WT:uggt	TRUE	0.1	0.0183413	23.8458	24.5266	0.680855	0	1.60309	CNAG_01053		Nuclear pore complex protein Nup160	macromolecule localization [GO:0033036]; organic substance transport [GO:0071702]	nuclear pore [GO:0005643]	structural constituent of nuclear pore [GO:0017056]
J9VLN7	WT:uggt	TRUE	0.1	0.271547	25.877	24.9108	-0.966206	0	0.51185	CNAG_05091		Uncharacterized protein	mitochondrial translation [GO:0032543]	mitochondrion [GO:0005739]	structural constituent of ribosome [GO:0003735]
J9VI76	WT:uggt	TRUE	0.1	0.00109696	22.9116	22.4726	-0.43909	0	0.737599	CNAG_02815		Glycerol-3-phosphate dehydrogenase (EC 1.1.5.3)	glycerol-3-phosphate metabolic process [GO:0006072]	glycerol-3-phosphate dehydrogenase (FAD) complex [GO:0009331]; mitochondrion [GO:0005739]	glycerol-3-phosphate dehydrogenase (quinone) activity [GO:0004368]
J9VQX1	WT:uggt	TRUE	0.2	0.226043	21.6349	23.0712	1.43636	0	2.70637	CNAG_04131		Antiviral helicase SKI2	nuclear-transcribed mRNA catabolic process, 3'-5' exonucleolytic nonsense-mediated decay [GO:0070478]	Ski complex [GO:0055087]	ATP binding [GO:0005524]; hydrolase activity [GO:0016787]; RNA binding [GO:0003723]; RNA helicase activity [GO:0003724]
J9VQN6	WT:uggt	TRUE	0.1	0.0511475	23.5217	22.3944	-1.1273	0	0.457771	CNAG_01252		Thiosulfate/3-mercaptopyruvate sulfurtransferase		cytosol [GO:0005829]; mitochondrion [GO:0005739]	thiosulfate sulfurtransferase activity [GO:0004792]
J9VSA0	WT:uggt	TRUE	0.1	0.242891	22.2373	17.8078	-4.42946	0	0.0464087	CNAG_02360		Uncharacterized protein
J9VMF9	WT:uggt	TRUE	0.2	0.120511	23.5661	20.6302	-2.93595	0	0.130675	CNAG_02153		Glucose repression regulatory protein TUP1		nucleus [GO:0005634]
J9VF09	WT:uggt	TRUE	0.7	0.446626	19.9464	17.6085	-2.33794	0	0.197793	CNAG_00766		Uncharacterized protein		membrane [GO:0016020]
J9VJ74	WT:uggt	TRUE	0.1	0.336425	18.811	22.8122	4.00121	0	16.0134	CNAG_03951		Uncharacterized protein
J9VPK0	WT:uggt	TRUE	1	0.652604	23.7967	23.6364	-0.160373	0	0.894794	CNAG_07625		Plasma membrane protein		membrane [GO:0016020]
J9VU31	WT:uggt	TRUE	0.7	0.144235	18.4299	11.4539	-6.97595	0	0.0079438	CNAG_01735		Uncharacterized protein
J9VLC8	WT:uggt	TRUE	0.2	0.119154	10.9907	19.8199	8.82929	0	454.865	CNAG_07482		SCF-associated factor 1	cell division [GO:0051301]	cytoplasm [GO:0005737]; nucleus [GO:0005634]	guanyl-nucleotide exchange factor activity [GO:0005085]
J9VFG4	WT:uggt	TRUE	0.4	0.357397	25.1096	20.5048	-4.60483	0	0.0410969	CNAG_00703		Large subunit ribosomal protein L31e	cytoplasmic translation [GO:0002181]	cytosolic large ribosomal subunit [GO:0022625]	structural constituent of ribosome [GO:0003735]
J9VVW7	WT:uggt	TRUE	0.4	0.364172	23.9796	19.9367	-4.04294	0	0.0606671	CNAG_06565		Uncharacterized protein
J9VRS1	WT:uggt	TRUE	0.1	0.345159	22.2206	18.5797	-3.64088	0	0.0801652	CNAG_02508		N-acetyltransferase domain-containing protein			acyltransferase activity, transferring groups other than amino-acyl groups [GO:0016747]
J9VUS0	WT:uggt	TRUE	0.1	0.183107	22.6753	17.2571	-5.41822	0	0.0233859	CNAG_03134		3-hydroxybutyryl-CoA dehydrogenase	fatty acid beta-oxidation [GO:0006635]		3-hydroxybutyryl-CoA dehydrogenase activity [GO:0008691]; NAD+ binding [GO:0070403]
J9VVJ4	WT:uggt	TRUE	0.1	0.010259	24.2277	24.681	0.453224	0	1.3691	CNAG_06244		Uncharacterized protein
J9VPU7	WT:uggt	TRUE	0.7	0.190115	22.1443	15.6206	-6.5237	0	0.0108685	CNAG_06838		RNA helicase (EC 3.6.4.13)	mitochondrial RNA 3'-end processing [GO:0000965]; RNA catabolic process [GO:0006401]	mitochondrial degradosome [GO:0045025]	ATP binding [GO:0005524]; hydrolase activity, acting on acid anhydrides [GO:0016817]; RNA helicase activity [GO:0003724]
J9VLM9	WT:uggt	TRUE	0.7	0.260109	15.8735	21.822	5.94852	0	61.7567	CNAG_03984		Rhodanese domain-containing protein		cytoplasm [GO:0005737]; nucleus [GO:0005634]	protein tyrosine phosphatase activity [GO:0004725]
J9W494	WT:uggt	TRUE	0.2	0.0837108	26.4633	26.1351	-0.328256	0	0.796499	CNAG_05634		Serine/threonine-protein phosphatase 2A 56 kDa regulatory subunit	signal transduction [GO:0007165]	cytosol [GO:0005829]; nucleus [GO:0005634]; protein phosphatase type 2A complex [GO:0000159]	protein phosphatase activator activity [GO:0072542]
J9VFC7	WT:uggt	TRUE	0.1	0.0550887	11.1974	11.9223	0.724906	0	1.65279	CNAG_00669		Ribosome assembly protein 3		preribosome, large subunit precursor [GO:0030687]
J9VNQ1	WT:uggt	TRUE	0.7	0.457865	21.973	18.8439	-3.12915	0	0.114296	CNAG_04968		Isopenicillin N synthase-like Fe(2+) 2OG dioxygenase domain-containing protein			2-oxoglutarate-dependent dioxygenase activity [GO:0016706]
J9VLW5	WT:uggt	TRUE	0.2	0.0996309	23.4667	24.2483	0.781637	0	1.71908	CNAG_05146		DNA-directed RNA polymerase subunit	maintenance of transcriptional fidelity during transcription elongation by RNA polymerase II [GO:0001193]; transcription initiation at RNA polymerase II promoter [GO:0006367]; transcription-coupled nucleotide-excision repair [GO:0006283]	nucleolus [GO:0005730]; RNA polymerase II, core complex [GO:0005665]	DNA-directed 5'-3' RNA polymerase activity [GO:0003899]; nucleic acid binding [GO:0003676]; zinc ion binding [GO:0008270]
T2BPT9	WT:uggt	TRUE	0.1	0.0229571	22.7363	21.7518	-0.984526	0	0.505392	CNAG_01696		Chaperone DnaJ, variant	chaperone cofactor-dependent protein refolding [GO:0051085]; protein refolding [GO:0042026]; response to heat [GO:0009408]	cytoplasm [GO:0005737]	ATP binding [GO:0005524]; heat shock protein binding [GO:0031072]; metal ion binding [GO:0046872]; unfolded protein binding [GO:0051082]
J9VXI4	WT:uggt	TRUE	0.4	0.892645	15.4008	14.6828	-0.717997	0	0.607941	CNAG_05532		Arylformamidase	biosynthetic process [GO:0009058]		pyridoxal phosphate binding [GO:0030170]
J9W1U6	WT:uggt	TRUE	0.7	0.140537	22.3946	15.3673	-7.02734	0	0.00766586	CNAG_01879		Carboxypeptidase (EC 3.4.16.-)	proteolysis [GO:0006508]	fungal-type vacuole [GO:0000324]	serine-type carboxypeptidase activity [GO:0004185]
J9VUX2	WT:uggt	TRUE	0.1	0.100944	16.2738	11.6451	-4.62874	0	0.0404213	CNAG_02328		Pre-rRNA-processing protein TSR1	endonucleolytic cleavage of tricistronic rRNA transcript (SSU-rRNA, 5.8S rRNA, LSU-rRNA) [GO:0000479]; maturation of SSU-rRNA from tricistronic rRNA transcript (SSU-rRNA, 5.8S rRNA, LSU-rRNA) [GO:0000462]	nucleolus [GO:0005730]; preribosome, small subunit precursor [GO:0030688]	GTP binding [GO:0005525]; GTPase activity [GO:0003924]; U3 snoRNA binding [GO:0034511]
J9VZZ6	WT:uggt	TRUE	0.7	0.513597	11.8391	15.0436	3.20457	0	9.21872	CNAG_06030		Uncharacterized protein
J9VLG3	WT:uggt	TRUE	0.7	0.458559	26.4341	26.05	-0.384065	0	0.766276	CNAG_03904		26S protease regulatory subunit 6B	proteasome-mediated ubiquitin-dependent protein catabolic process [GO:0043161]	proteasome regulatory particle, base subcomplex [GO:0008540]	ATP binding [GO:0005524]; ATP hydrolysis activity [GO:0016887]; peptidase activity [GO:0008233]; proteasome-activating activity [GO:0036402]
J9VP96	WT:uggt	TRUE	0.4	0.326218	26.0596	25.928	-0.131528	0	0.912864	CNAG_04010		GTP cyclohydrolase 1 (EC 3.5.4.16) (GTP cyclohydrolase I)	folic acid biosynthetic process [GO:0046656]; tetrahydrobiopterin biosynthetic process [GO:0006729]; tetrahydrofolate biosynthetic process [GO:0046654]	cytoplasm [GO:0005737]	GTP binding [GO:0005525]; GTP cyclohydrolase I activity [GO:0003934]; zinc ion binding [GO:0008270]
J9VIW7	WT:uggt	TRUE	0.1	0.135405	25.6483	25.1699	-0.478373	0	0.717787	CNAG_03861		Cytochrome c oxidase subunit 6, mitochondrial (Cytochrome c oxidase polypeptide VI)	mitochondrial electron transport, cytochrome c to oxygen [GO:0006123]	mitochondrial respiratory chain complex IV [GO:0005751]	metal ion binding [GO:0046872]
J9VXN4	WT:uggt	TRUE	1	0.770001	11.0094	11.1995	0.190099	0	1.14084	CNAG_01982		Rho-GAP domain-containing protein	negative regulation of endocytic recycling [GO:2001136]; small GTPase-mediated signal transduction [GO:0007264]	cytoplasm [GO:0005737]	GTPase activator activity [GO:0005096]
Q059G6	WT:uggt	TRUE	0.1	0.0517047	27.108	25.4287	-1.6793	0	0.312233	CNAG_03765	TPS2	Trehalose-6-phosphate phosphatase (Trehalose-phosphatase)	cellular response to heat [GO:0034605]; fungal-type cell wall organization [GO:0031505]; trehalose biosynthetic process [GO:0005992]; trehalose metabolism in response to stress [GO:0070413]	alpha,alpha-trehalose-phosphate synthase complex (UDP-forming) [GO:0005946]; cytosol [GO:0005829]	metal ion binding [GO:0046872]; trehalose-phosphatase activity [GO:0004805]
J9VSD0	WT:uggt	TRUE	0.4	0.301201	24.6084	19.7569	-4.85146	0	0.034639	CNAG_06864		Uncharacterized protein
J9VWF4	WT:uggt	TRUE	0.1	0.0631832	23.1681	22.6173	-0.550803	0	0.68264	CNAG_04182		Uncharacterized protein		mitochondrial large ribosomal subunit [GO:0005762]	structural constituent of ribosome [GO:0003735]
J9VPT9	WT:uggt	TRUE	0.4	0.368746	19.731	24.249	4.51794	0	22.9106	CNAG_02967		NADH:ubiquinone oxidoreductase intermediate-associated protein 30 domain-containing protein	NADH dehydrogenase complex assembly [GO:0010257]		unfolded protein binding [GO:0051082]
J9VY39	WT:uggt	TRUE	0.7	0.453618	25.3944	24.8614	-0.532986	0	0.691123	CNAG_06106		Chaperone regulator	chaperone cofactor-dependent protein refolding [GO:0051085]; translational initiation [GO:0006413]	cytosol [GO:0005829]	protein-folding chaperone binding [GO:0051087]; unfolded protein binding [GO:0051082]
J9VIN5	WT:uggt	TRUE	1	0.430319	11.2418	14.6268	3.38501	0	10.447	CNAG_07548		Cytoplasmic protein		Set1C/COMPASS complex [GO:0048188]	histone binding [GO:0042393]
J9VI13	WT:uggt	TRUE	0.4	0.431423	12.0731	11.9668	-0.10638	0	0.928916	CNAG_06774	TRM8	tRNA (guanine-N(7)-)-methyltransferase (EC 2.1.1.33) (Transfer RNA methyltransferase 8) (tRNA (guanine(46)-N(7))-methyltransferase) (tRNA(m7G46)-methyltransferase)		nucleus [GO:0005634]; tRNA methyltransferase complex [GO:0043527]	tRNA (guanine(46)-N7)-methyltransferase activity [GO:0008176]; tRNA binding [GO:0000049]
J9VX45	WT:uggt	TRUE	0.1	0.056109	24.057	24.4426	0.385578	0	1.30638	CNAG_05599		Uncharacterized protein
J9VZU1	WT:uggt	TRUE	0.4	0.895738	19.1652	20.0195	0.854346	0	1.80794	CNAG_05530	AIM41	Altered inheritance of mitochondria protein 41		mitochondrion [GO:0005739]	carbon-nitrogen ligase activity, with glutamine as amido-N-donor [GO:0016884]
J9VU59	WT:uggt	TRUE	0.7	0.550326	23.9146	24.4838	0.569202	0	1.4837	CNAG_04189		Succinate dehydrogenase [ubiquinone] flavoprotein subunit, mitochondrial (EC 1.3.5.1)	anaerobic respiration [GO:0009061]; mitochondrial electron transport, succinate to ubiquinone [GO:0006121]; tricarboxylic acid cycle [GO:0006099]	mitochondrial respiratory chain complex II, succinate dehydrogenase complex (ubiquinone) [GO:0005749]; plasma membrane [GO:0005886]	electron transfer activity [GO:0009055]; flavin adenine dinucleotide binding [GO:0050660]; succinate dehydrogenase (quinone) activity [GO:0008177]
J9VZA8	WT:uggt	TRUE	0.1	0.0796146	22.3562	14.785	-7.57118	0	0.00525834	CNAG_05365		ribose-phosphate diphosphokinase (EC 2.7.6.1)	5-phosphoribose 1-diphosphate biosynthetic process [GO:0006015]; fungal-type cell wall organization [GO:0031505]; purine nucleotide biosynthetic process [GO:0006164]; ribonucleoside monophosphate biosynthetic process [GO:0009156]	cytoplasm [GO:0005737]; ribose phosphate diphosphokinase complex [GO:0002189]	ATP binding [GO:0005524]; kinase activity [GO:0016301]; magnesium ion binding [GO:0000287]; ribose phosphate diphosphokinase activity [GO:0004749]
J9VKX6	WT:uggt	TRUE	0.1	0.0891361	21.7643	14.7914	-6.97288	0	0.00796077	CNAG_01015		Cytoplasmic protein		cytoplasm [GO:0005737]; membrane [GO:0016020]
J9VH04	WT:uggt	TRUE	0.1	0.0881049	23.1168	14.7728	-8.34392	0	0.00307771	CNAG_03928		AP complex subunit beta	intracellular protein transport [GO:0006886]; vesicle-mediated transport [GO:0016192]	membrane coat [GO:0030117]	clathrin binding [GO:0030276]
J9VP65	WT:uggt	TRUE	0.7	0.360631	23.1494	19.1788	-3.97059	0	0.0637872	CNAG_07488		DUF1682-domain-containing protein	endoplasmic reticulum calcium ion homeostasis [GO:0032469]	endoplasmic reticulum [GO:0005783]; membrane [GO:0016020]	calcium ion binding [GO:0005509]
J9VJ37	WT:uggt	TRUE	0.1	0.23967	24.3161	18.6962	-5.61991	0	0.0203347	CNAG_00482		26S proteasome regulatory subunit N10	proteasome-mediated ubiquitin-dependent protein catabolic process [GO:0043161]	cytosol [GO:0005829]; nucleus [GO:0005634]; proteasome regulatory particle, base subcomplex [GO:0008540]	polyubiquitin modification-dependent protein binding [GO:0031593]
J9VN50	WT:uggt	TRUE	0.1	0.071124	29.5267	28.9475	-0.579232	0	0.66932	CNAG_02673		NAD dependent epimerase/dehydratase
J9VW22	WT:uggt	TRUE	0.4	0.329308	11.0437	16.7974	5.75365	0	53.9538	CNAG_04599		3-methyl-2-oxobutanoate hydroxymethyltransferase (EC 2.1.2.11)	methylation [GO:0032259]; pantothenate biosynthetic process [GO:0015940]; translation [GO:0006412]	mitochondrion [GO:0005739]	3-methyl-2-oxobutanoate hydroxymethyltransferase activity [GO:0003864]; magnesium ion binding [GO:0000287]; methyltransferase activity [GO:0008168]
J9VH44	WT:uggt	TRUE	1	0.876041	22.9138	22.7775	-0.136295	0	0.909853	CNAG_03978		Ubiquitin-like domain-containing protein		membrane [GO:0016020]
J9VNY3	WT:uggt	TRUE	0.2	0.107076	18.8343	11.5982	-7.23618	0	0.00663274	CNAG_05060		Protein SYM1		cytoplasm [GO:0005737]; membrane [GO:0016020]
J9VQM2	WT:uggt	TRUE	0.4	0.282324	26.6006	26.2468	-0.353843	0	0.782497	CNAG_03553		Uncharacterized protein		membrane [GO:0016020]
J9VMY3	WT:uggt	TRUE	0.4	0.495836	24.9159	25.0154	0.0994646	0	1.07138	CNAG_06552		CAMK/CAMKL/AMPK protein kinase	intracellular signal transduction [GO:0035556]	cytoplasm [GO:0005737]	ATP binding [GO:0005524]; protein serine kinase activity [GO:0106310]; protein serine/threonine kinase activity [GO:0004674]
J9VNR8	WT:uggt	TRUE	0.1	0.00625518	22.9079	22.21	-0.697966	0	0.616441	CNAG_04989		Protein FRG1		catalytic step 2 spliceosome [GO:0071013]; nucleolus [GO:0005730]; striated muscle dense body [GO:0055120]	actin filament binding [GO:0051015]
J9VS05	WT:uggt	TRUE	1	0.841108	15.6811	14.8649	-0.816217	0	0.567929	CNAG_04538		Ubiquitin-like modifier-activating enzyme ATG7 (Autophagy-related protein 7)	autophagosome assembly [GO:0000045]; cellular response to nitrogen starvation [GO:0006995]; piecemeal microautophagy of the nucleus [GO:0034727]; protein modification by small protein conjugation [GO:0032446]; protein transport [GO:0015031]	phagophore assembly site [GO:0000407]	Atg12 activating enzyme activity [GO:0019778]; Atg8 activating enzyme activity [GO:0019779]
J9VTL6	WT:uggt	TRUE	0.4	0.206006	24.3113	23.3288	-0.982449	0	0.50612	CNAG_06644	ERG5	C-22 sterol desaturase	sterol metabolic process [GO:0016125]		heme binding [GO:0020037]; iron ion binding [GO:0005506]; monooxygenase activity [GO:0004497]; oxidoreductase activity, acting on paired donors, with incorporation or reduction of molecular oxygen [GO:0016705]
J9VJR2	WT:uggt	TRUE	0.1	0.0555486	14.2939	22.3148	8.02091	0	259.738	CNAG_00719		Ribosome biogenesis ATPase	ribosome biogenesis [GO:0042254]	nucleus [GO:0005634]	ATP binding [GO:0005524]; ATP hydrolysis activity [GO:0016887]; preribosome binding [GO:1990275]; RNA binding [GO:0003723]
J9VLJ4	WT:uggt	TRUE	0.7	0.919133	14.6092	15.1099	0.500686	0	1.41489	CNAG_01024		Translocation protein SEC72	protein folding [GO:0006457]	cytosol [GO:0005829]; nucleus [GO:0005634]	Hsp70 protein binding [GO:0030544]; Hsp90 protein binding [GO:0051879]
J9VPV6	WT:uggt	TRUE	0.2	0.193803	23.2848	23.1285	-0.156219	0	0.897374	CNAG_03271		Pre-mRNA-splicing factor PRP46 (Pre-mRNA-processing protein 46)	mRNA splicing, via spliceosome [GO:0000398]	catalytic step 2 spliceosome [GO:0071013]; precatalytic spliceosome [GO:0071011]; Prp19 complex [GO:0000974]
J9VSX6	WT:uggt	TRUE	0.2	0.245746	18.273	22.4688	4.19575	0	18.3251	CNAG_04670		Nucleoporin Nup54 alpha-helical domain-containing protein	NLS-bearing protein import into nucleus [GO:0006607]; nuclear pore organization [GO:0006999]; protein localization to nuclear inner membrane [GO:0036228]	nuclear pore central transport channel [GO:0044613]	structural constituent of nuclear pore [GO:0017056]
J9VW24	WT:uggt	TRUE	0.2	0.111206	28.2628	27.7709	-0.491982	0	0.711048	CNAG_06443		Endoplasmic reticulum chaperone BiP (EC 3.6.4.10) (Immunoglobulin heavy chain-binding protein homolog)	endoplasmic reticulum unfolded protein response [GO:0030968]	endoplasmic reticulum chaperone complex [GO:0034663]; endoplasmic reticulum lumen [GO:0005788]; membrane [GO:0016020]; nucleus [GO:0005634]	ATP binding [GO:0005524]; ATP-dependent protein folding chaperone [GO:0140662]
J9W1Z7	WT:uggt	TRUE	0.1	0.271366	20.6226	25.953	5.33035	0	40.2343	CNAG_05610		Trafficking protein particle complex subunit	endoplasmic reticulum to Golgi vesicle-mediated transport [GO:0006888]	endoplasmic reticulum [GO:0005783]; Golgi apparatus [GO:0005794]; TRAPP complex [GO:0030008]
J9VQ27	WT:uggt	TRUE	0.7	0.161742	22.6613	15.2561	-7.40522	0	0.00589937	CNAG_02886		Proteasome subunit beta	proteasome-mediated ubiquitin-dependent protein catabolic process [GO:0043161]	cytosol [GO:0005829]; nucleus [GO:0005634]; proteasome core complex, beta-subunit complex [GO:0019774]
J9VL07	WT:uggt	TRUE	0.1	0.2282	22.3907	18.1457	-4.24503	0	0.0527375	CNAG_01238		Arginine biosynthesis bifunctional protein ArgJ, mitochondrial [Cleaved into: Arginine biosynthesis bifunctional protein ArgJ alpha chain; Arginine biosynthesis bifunctional protein ArgJ beta chain] [Includes: Glutamate N-acetyltransferase (GAT) (EC 2.3.1.35) (Ornithine acetyltransferase) (OATase) (Ornithine transacetylase); Amino-acid acetyltransferase (EC 2.3.1.1) (N-acetylglutamate synthase) (…	arginine biosynthetic process [GO:0006526]; ornithine biosynthetic process [GO:0006592]	mitochondrial matrix [GO:0005759]	acetyl-CoA:L-glutamate N-acetyltransferase activity [GO:0004042]; glutamate N-acetyltransferase activity [GO:0004358]; methione N-acyltransferase activity [GO:0103045]
J9VXV1	WT:uggt	TRUE	0.7	0.371084	24.9608	20.6502	-4.31058	0	0.0503948	CNAG_04792	PSD2	Phosphatidylserine decarboxylase proenzyme 2 (EC 4.1.1.65) [Cleaved into: Phosphatidylserine decarboxylase 2 beta chain; Phosphatidylserine decarboxylase 2 alpha chain]	phosphatidylethanolamine biosynthetic process [GO:0006646]; protein autoprocessing [GO:0016540]	endosome membrane [GO:0010008]; Golgi membrane [GO:0000139]; Golgi stack [GO:0005795]	calcium ion binding [GO:0005509]; phosphatidylserine decarboxylase activity [GO:0004609]
J9VTK2	WT:uggt	TRUE	1	0.526678	16.1709	13.6592	-2.51165	0	0.175355	CNAG_04627		COP9 signalosome complex subunit 12	poly(A)+ mRNA export from nucleus [GO:0016973]; post-transcriptional tethering of RNA polymerase II gene DNA at nuclear periphery [GO:0000973]; transcription elongation by RNA polymerase II [GO:0006368]	transcription export complex 2 [GO:0070390]	double-stranded DNA binding [GO:0003690]; RNA binding [GO:0003723]
J9VI54	WT:uggt	TRUE	0.1	0.215911	25.3957	19.4635	-5.93215	0	0.0163774	CNAG_06728		Kinesin	microtubule-based movement [GO:0007018]	cytoskeleton [GO:0005856]	ATP binding [GO:0005524]; microtubule binding [GO:0008017]; microtubule motor activity [GO:0003777]
J9VJZ6	WT:uggt	TRUE	0.2	0.136477	27.4581	27.1599	-0.298164	0	0.813287	CNAG_00768		NADH:ubiquinone oxidoreductase intermediate-associated protein 30 domain-containing protein	mitochondrial electron transport, NADH to ubiquinone [GO:0006120]; mitochondrial respiratory chain complex I assembly [GO:0032981]	mitochondrion [GO:0005739]	unfolded protein binding [GO:0051082]
J9VPI2	WT:uggt	TRUE	0.1	0.0310996	23.2789	22.6024	-0.676435	0	0.625709	CNAG_07498		Uncharacterized protein
J9VW55	WT:uggt	TRUE	0.2	0.126773	24.4926	24.2925	-0.200049	0	0.870521	CNAG_06620		Mitochondrial Rho GTPase (EC 3.6.5.-)	mitochondrion organization [GO:0007005]; small GTPase-mediated signal transduction [GO:0007264]	mitochondrial outer membrane [GO:0005741]	calcium ion binding [GO:0005509]; GTP binding [GO:0005525]; GTPase activity [GO:0003924]
J9VNR2	WT:uggt	TRUE	0.7	0.132816	21.0998	14.853	-6.24679	0	0.0131683	CNAG_03834		C4-hydroxylase	cholesterol biosynthetic process via lathosterol [GO:0033490]; ergosterol biosynthetic process [GO:0006696]; sphingolipid biosynthetic process [GO:0030148]	endoplasmic reticulum membrane [GO:0005789]	C-4 methylsterol oxidase activity [GO:0000254]; C-5 sterol desaturase activity [GO:0000248]; iron ion binding [GO:0005506]; sphingolipid delta-4 desaturase activity [GO:0042284]; sphingosine hydroxylase activity [GO:0000170]
J9VNF5	WT:uggt	TRUE	0.2	0.306639	11.0147	15.1707	4.15599	0	17.8269	CNAG_02027		Uncharacterized protein
J9VUQ2	WT:uggt	TRUE	1	0.621921	14.7864	17.6382	2.85185	0	7.21923	CNAG_03119		Dynactin 2	cytoskeleton-dependent cytokinesis [GO:0061640]	dynactin complex [GO:0005869]
J9VVC7	WT:uggt	TRUE	1	0.570051	11.5533	11.099	-0.45433	0	0.729849	CNAG_04844		Mitochondrial import receptor subunit tom22	intracellular protein transport [GO:0006886]	mitochondrial outer membrane [GO:0005741]
J9VRA6	WT:uggt	TRUE	0.2	0.101296	17.3561	11.4541	-5.90196	0	0.0167237	CNAG_00993	COQ7	5-demethoxyubiquinone hydroxylase, mitochondrial (DMQ hydroxylase) (EC 1.14.99.60) (Ubiquinone biosynthesis monooxygenase COQ7)	determination of adult lifespan [GO:0008340]; regulation of gene expression [GO:0010468]; regulation of reactive oxygen species metabolic process [GO:2000377]; ubiquinone biosynthetic process [GO:0006744]	extrinsic component of mitochondrial inner membrane [GO:0031314]; nucleus [GO:0005634]	3-demethoxyubiquinol 3-hydroxylase activity [GO:0008682]; metal ion binding [GO:0046872]; oxidoreductase activity, acting on paired donors, with incorporation or reduction of molecular oxygen, NAD(P)H as one donor, and incorporation of one atom of oxygen [GO:0016709]
J9VP38	WT:uggt	TRUE	0.7	0.973005	23.4976	23.4675	-0.0300539	0	0.979384	CNAG_03935		Endothelin-converting enzyme	protein processing [GO:0016485]	plasma membrane [GO:0005886]	metal ion binding [GO:0046872]; metalloendopeptidase activity [GO:0004222]
J9VK45	WT:uggt	TRUE	0.7	0.173534	28.8954	26.8524	-2.04306	0	0.242649	CNAG_01305		methionine--tRNA ligase (EC 6.1.1.10) (Methionyl-tRNA synthetase)	methionyl-tRNA aminoacylation [GO:0006431]	aminoacyl-tRNA synthetase multienzyme complex [GO:0017101]; cytosol [GO:0005829]	ATP binding [GO:0005524]; methionine-tRNA ligase activity [GO:0004825]
J9VU89	WT:uggt	TRUE	0.7	0.943604	24.5241	24.4643	-0.0597981	0	0.959398	CNAG_01628		Small subunit ribosomal protein S20	translation [GO:0006412]	cytosolic small ribosomal subunit [GO:0022627]	RNA binding [GO:0003723]; structural constituent of ribosome [GO:0003735]
J9VNZ3	WT:uggt	TRUE	1	0.877862	25.0301	25.0947	0.0646368	0	1.04582	CNAG_05070		Sulfite reductase (NADPH) hemoprotein, beta-component	cysteine biosynthetic process [GO:0019344]; sulfate assimilation [GO:0000103]	sulfite reductase complex (NADPH) [GO:0009337]	4 iron, 4 sulfur cluster binding [GO:0051539]; FMN binding [GO:0010181]; heme binding [GO:0020037]; metal ion binding [GO:0046872]; NADP binding [GO:0050661]; sulfite reductase (ferredoxin) activity [GO:0050311]; sulfite reductase (NADPH) activity [GO:0004783]
J9VLC5	WT:uggt	TRUE	0.4	0.267587	20.8587	21.4617	0.602952	0	1.51882	CNAG_02546		Transferase	GMP salvage [GO:0032263]; hypoxanthine metabolic process [GO:0046100]; IMP salvage [GO:0032264]; XMP salvage [GO:0032265]	cytoplasm [GO:0005737]	hypoxanthine phosphoribosyltransferase activity [GO:0004422]
J9VZ40	WT:uggt	TRUE	0.1	0.0107652	11.0031	11.697	0.693832	0	1.61757	CNAG_06495		RNA exonuclease 1		nucleus [GO:0005634]	exonuclease activity [GO:0004527]; nucleic acid binding [GO:0003676]
J9VHG8	WT:uggt	TRUE	0.1	0.294922	18.9793	23.658	4.67877	0	25.6124	CNAG_03071		Exostosin GT47 domain-containing protein		membrane [GO:0016020]
J9VQ85	WT:uggt	TRUE	0.7	0.491105	11.8587	15.1275	3.26881	0	9.63852	CNAG_03413		Alginate lyase			lyase activity [GO:0016829]
J9W025	WT:uggt	TRUE	0.7	0.581661	23.1587	23.6189	0.460118	0	1.37565	CNAG_06075		Ribosome maturation protein SDO1/SBDS N-terminal domain-containing protein
J9VT66	WT:uggt	TRUE	0.7	0.131089	22.1638	15.5271	-6.63664	0	0.0100502	CNAG_03389		Alpha-ketoglutarate catabolism dioxygenase	sulfur compound metabolic process [GO:0006790]	cytoplasm [GO:0005737]	dioxygenase activity [GO:0051213]
J9VNP3	WT:uggt	TRUE	0.1	0.0595613	25.0005	24.666	-0.334461	0	0.79308	CNAG_03814		Small nuclear ribonucleoprotein Sm D2 (Sm-D2) (snRNP core protein D2)	spliceosomal snRNP assembly [GO:0000387]	catalytic step 2 spliceosome [GO:0071013]; pICln-Sm protein complex [GO:0034715]; precatalytic spliceosome [GO:0071011]; U1 snRNP [GO:0005685]; U2 snRNP [GO:0005686]; U4/U6 x U5 tri-snRNP complex [GO:0046540]; U5 snRNP [GO:0005682]	RNA binding [GO:0003723]
J9VYP5	WT:uggt	TRUE	0.1	0.0760333	26.8505	26.0615	-0.788948	0	0.578766	CNAG_06314	ADE57	Bifunctional purine biosynthetic protein ADE5,7 [Includes: Phosphoribosylamine--glycine ligase (EC 6.3.4.13) (Glycinamide ribonucleotide synthetase) (GAR synthetase) (GARS) (Phosphoribosylglycinamide synthetase); Phosphoribosylformylglycinamidine cyclo-ligase (EC 6.3.3.1) (AIR synthase) (AIR synthetase) (AIRS) (Phosphoribosyl-aminoimidazole synthetase)]	'de novo' IMP biosynthetic process [GO:0006189]; adenine biosynthetic process [GO:0046084]	cytosol [GO:0005829]	ATP binding [GO:0005524]; metal ion binding [GO:0046872]; phosphoribosylamine-glycine ligase activity [GO:0004637]; phosphoribosylformylglycinamidine cyclo-ligase activity [GO:0004641]
J9VQD5	WT:uggt	TRUE	0.7	0.129947	22.7744	15.1237	-7.65069	0	0.00497636	CNAG_07522		GDP/GTP exchange factor Sec2 N-terminal domain-containing protein	exocytosis [GO:0006887]	cell tip [GO:0051286]; Golgi to plasma membrane transport vesicle [GO:0070319]	guanyl-nucleotide exchange factor activity [GO:0005085]
J9VXC0	WT:uggt	TRUE	0.7	0.384574	17.9602	21.2819	3.32174	0	9.99869	CNAG_03135		DUF803-domain-containing protein		membrane [GO:0016020]	magnesium ion transmembrane transporter activity [GO:0015095]
J9VY44	WT:uggt	TRUE	0.1	0.0730482	26.5051	25.4738	-1.0313	0	0.489268	CNAG_06112		Ammonium-dependent carbamoyl phosphate synthetase (EC 6.3.4.16) (EC 6.3.5.5) (Arginine-specific carbamoyl phosphate synthetase, ammonia chain) (Glutamine-dependent carbamoyl phosphate synthetase)	glutamine metabolic process [GO:0006541]	cytoplasm [GO:0005737]	ATP binding [GO:0005524]; carbamoyl-phosphate synthase (glutamine-hydrolyzing) activity [GO:0004088]; metal ion binding [GO:0046872]
J9VL38	WT:uggt	TRUE	0.7	0.424931	19.6842	23.8506	4.16639	0	17.956	CNAG_01195		Cation-transporting ATPase (EC 7.2.2.-)	intracellular calcium ion homeostasis [GO:0006874]	late endosome membrane [GO:0031902]	ATP binding [GO:0005524]; ATP hydrolysis activity [GO:0016887]; ATPase-coupled monoatomic cation transmembrane transporter activity [GO:0019829]; metal ion binding [GO:0046872]; P-type ion transporter activity [GO:0015662]; polyamine transmembrane transporter activity [GO:0015203]
J9VVS0	WT:uggt	TRUE	0.1	0.0156132	21.024	21.5751	0.551109	0	1.46521	CNAG_04728		DNA-directed RNA polymerase III subunit RPC8	transcription initiation at RNA polymerase III promoter [GO:0006384]	RNA polymerase III complex [GO:0005666]
J9W114	WT:uggt	TRUE	0.7	0.871598	21.749	21.5911	-0.157952	0	0.896297	CNAG_06431		short-chain 2-methylacyl-CoA dehydrogenase (EC 1.3.8.5)		mitochondrion [GO:0005739]	acyl-CoA dehydrogenase activity [GO:0003995]; flavin adenine dinucleotide binding [GO:0050660]
T2BQQ1	WT:uggt	TRUE	0.7	0.157395	18.6626	11.2931	-7.36951	0	0.00604722	CNAG_03839		CCR4-NOT transcription complex subunit 4, variant 1 (CCR4-NOT transcription complex subunit 4, variant 2)	protein ubiquitination [GO:0016567]	CCR4-NOT complex [GO:0030014]	nucleic acid binding [GO:0003676]; ubiquitin-protein transferase activity [GO:0004842]
J9VKG7	WT:uggt	TRUE	0.1	0.285241	24.5549	19.664	-4.89096	0	0.0337035	CNAG_02786		Dihydropteroate synthase	folic acid biosynthetic process [GO:0046656]; tetrahydrofolate biosynthetic process [GO:0046654]	cytosol [GO:0005829]; mitochondrial envelope [GO:0005740]	2-amino-4-hydroxy-6-hydroxymethyldihydropteridine diphosphokinase activity [GO:0003848]; ATP binding [GO:0005524]; dihydroneopterin aldolase activity [GO:0004150]; dihydropteroate synthase activity [GO:0004156]; kinase activity [GO:0016301]; metal ion binding [GO:0046872]
J9VVU4	WT:uggt	TRUE	0.1	0.23901	23.4188	18.3326	-5.08618	0	0.029438	CNAG_06344		IMS import disulfide relay-system CHCH-CHCH-like Cx9C domain-containing protein	cellular respiration [GO:0045333]	mitochondrial intermembrane space [GO:0005758]
J9VPZ6	WT:uggt	TRUE	0.1	0.226556	25.8795	19.3335	-6.54595	0	0.0107022	CNAG_03109		Ubiquitin carboxyl-terminal hydrolase (EC 3.4.19.12)	proteasome-mediated ubiquitin-dependent protein catabolic process [GO:0043161]; regulation of proteasomal protein catabolic process [GO:0061136]		cysteine-type deubiquitinase activity [GO:0004843]; proteasome binding [GO:0070628]
J9VRS7	WT:uggt	TRUE	0.7	0.13578	23.1787	15.6859	-7.49275	0	0.00555211	CNAG_02503		Glutathione peroxidase	cellular response to oxidative stress [GO:0034599]	cytosol [GO:0005829]; mitochondrion [GO:0005739]; nucleus [GO:0005634]	glutathione peroxidase activity [GO:0004602]; phospholipid-hydroperoxide glutathione peroxidase activity [GO:0047066]; thioredoxin-dependent peroxiredoxin activity [GO:0140824]
J9VEH5	WT:uggt	TRUE	0.1	0.10241	22.1878	15.0554	-7.13236	0	0.00712765	CNAG_00265		isopentenyl-diphosphate Delta-isomerase (EC 5.3.3.2)	dimethylallyl diphosphate biosynthetic process [GO:0050992]; isopentenyl diphosphate biosynthetic process [GO:0009240]	cytoplasm [GO:0005737]	isopentenyl-diphosphate delta-isomerase activity [GO:0004452]
T2BNL9	WT:uggt	TRUE	0.1	0.00324973	23.9791	24.3877	0.408656	0	1.32745	CNAG_01341		Mannose-6-phosphate isomerase, variant			isomerase activity [GO:0016853]
J9W009	WT:uggt	TRUE	0.1	0.286562	18.4631	22.3244	3.86137	0	14.5341	CNAG_05621		Folylpolyglutamate synthase	one-carbon metabolic process [GO:0006730]	cytosol [GO:0005829]; mitochondrion [GO:0005739]	ATP binding [GO:0005524]; dihydrofolate synthase activity [GO:0008841]; metal ion binding [GO:0046872]; tetrahydrofolylpolyglutamate synthase activity [GO:0004326]
J9VV76	WT:uggt	TRUE	0.2	0.0912978	11.12	18.8691	7.74906	0	215.13	CNAG_02210		Ribonuclease Z		membrane [GO:0016020]; nucleus [GO:0005634]	3'-tRNA processing endoribonuclease activity [GO:0042781]
J9VVV6	WT:uggt	TRUE	0.1	0.0967178	22.888	14.5753	-8.3127	0	0.00314505	CNAG_06555		Aromatic amino acid aminotransferase I	aromatic amino acid family catabolic process [GO:0009074]; lysine biosynthetic process via aminoadipic acid [GO:0019878]; tyrosine biosynthetic process [GO:0006571]		2-aminoadipate transaminase activity [GO:0047536]; aromatic-amino-acid:2-oxoglutarate aminotransferase activity [GO:0008793]; pyridoxal phosphate binding [GO:0030170]
J9VYS6	WT:uggt	TRUE	0.1	0.115986	27.2253	25.8573	-1.36798	0	0.387434	CNAG_01609		Cystathionine gamma-synthase	transsulfuration [GO:0019346]		cystathionine gamma-synthase activity [GO:0003962]; pyridoxal phosphate binding [GO:0030170]
J9VGQ5	WT:uggt	TRUE	0.2	0.258058	18.5527	23.1246	4.57188	0	23.7833	CNAG_04072		60S ribosome subunit biogenesis protein NIP7	ribosomal large subunit biogenesis [GO:0042273]; ribosome assembly [GO:0042255]	nucleolus [GO:0005730]; preribosome, large subunit precursor [GO:0030687]	RNA binding [GO:0003723]
J9VJB8	WT:uggt	TRUE	0.4	0.282096	24.0918	23.4508	-0.640995	0	0.641271	CNAG_04001		Proteasome subunit alpha type	proteasomal protein catabolic process [GO:0010498]; ubiquitin-dependent protein catabolic process [GO:0006511]	cytosol [GO:0005829]; nucleus [GO:0005634]; proteasome core complex, alpha-subunit complex [GO:0019773]
J9VSP3	WT:uggt	TRUE	0.4	0.140966	22.0207	23.3783	1.35761	0	2.5626	CNAG_01397		Mitochondrial import inner membrane translocase subunit	protein import into mitochondrial matrix [GO:0030150]	TIM23 mitochondrial import inner membrane translocase complex [GO:0005744]	protein transmembrane transporter activity [GO:0008320]
Q85T01	WT:uggt	TRUE	1	0.591918	15.3073	18.6269	3.31957	0	9.98366	CNAG_09006		NADH-ubiquinone oxidoreductase chain 5 (EC 7.1.1.2)	ATP synthesis coupled electron transport [GO:0042773]; electron transport coupled proton transport [GO:0015990]	mitochondrial respiratory chain complex I [GO:0005747]	NADH dehydrogenase (ubiquinone) activity [GO:0008137]
J9VX99	WT:uggt	TRUE	0.1	0.160742	29.6154	28.6038	-1.01155	0	0.496014	CNAG_01820		Pyruvate kinase (EC 2.7.1.40)		cytoplasm [GO:0005737]	ATP binding [GO:0005524]; kinase activity [GO:0016301]; magnesium ion binding [GO:0000287]; potassium ion binding [GO:0030955]; pyruvate kinase activity [GO:0004743]
J9VUM8	WT:uggt	TRUE	0.7	0.368137	22.3075	18.3883	-3.91912	0	0.0661041	CNAG_07765		General stress protein FMN-binding split barrel domain-containing protein
J9VTI9	WT:uggt	TRUE	1	0.846493	23.7552	23.6594	-0.0957631	0	0.935777	CNAG_06613		Endoplasmic reticulum protein	cellular response to misfolded protein [GO:0071218]; chaperone cofactor-dependent protein refolding [GO:0051085]	endoplasmic reticulum membrane [GO:0005789]	Hsp70 protein binding [GO:0030544]
J9VV68	WT:uggt	TRUE	0.1	0.0392584	28.0983	27.3704	-0.727879	0	0.603791	CNAG_04904		Clathrin heavy chain	Golgi to endosome transport [GO:0006895]; intracellular protein transport [GO:0006886]; receptor-mediated endocytosis [GO:0006898]	actin cortical patch [GO:0030479]; clathrin coat of coated pit [GO:0030132]; clathrin coat of trans-Golgi network vesicle [GO:0030130]; clathrin complex [GO:0071439]; clathrin-coated endocytic vesicle [GO:0045334]; cytosol [GO:0005829]	clathrin light chain binding [GO:0032051]; structural molecule activity [GO:0005198]
J9VKI4	WT:uggt	TRUE	0.2	0.109383	19.1645	13.6264	-5.5381	0	0.0215212	CNAG_01173		Uncharacterized protein		nucleus [GO:0005634]	DNA-binding transcription activator activity, RNA polymerase II-specific [GO:0001228]; RNA polymerase II cis-regulatory region sequence-specific DNA binding [GO:0000978]
J9VWW7	WT:uggt	TRUE	0.4	0.620616	11.6168	11.2475	-0.369296	0	0.77416	CNAG_05511		ATPase		mitochondrial outer membrane [GO:0005741]	ATP binding [GO:0005524]; ATP hydrolysis activity [GO:0016887]
J9VY28	WT:uggt	TRUE	0.7	0.453844	25.5893	25.3434	-0.245868	0	0.843308	CNAG_06096		Tricarboxylate carrier	alpha-ketoglutarate transport [GO:0015742]; mitochondrial citrate transmembrane transport [GO:0006843]	membrane [GO:0016020]; mitochondrion [GO:0005739]	tricarboxylate secondary active transmembrane transporter activity [GO:0005371]
J9VW93	WT:uggt	TRUE	0.7	0.650432	11.0649	11.3498	0.284943	0	1.21836	CNAG_06670		HIV Tat-specific factor 1		membrane [GO:0016020]; U2 snRNP [GO:0005686]; U2-type spliceosomal complex [GO:0005684]	RNA binding [GO:0003723]
J9W1R2	WT:uggt	TRUE	0.1	0.206963	26.0416	24.3603	-1.68132	0	0.311797	CNAG_01840		Tubulin beta chain	microtubule cytoskeleton organization [GO:0000226]; mitotic cell cycle [GO:0000278]	cytoplasm [GO:0005737]; microtubule [GO:0005874]	GTP binding [GO:0005525]; GTPase activity [GO:0003924]; structural constituent of cytoskeleton [GO:0005200]
J9VLL8	WT:uggt	TRUE	0.7	0.555128	21.0193	18.6982	-2.32107	0	0.200119	CNAG_00999		TIGR00297 family protein		membrane [GO:0016020]
J9VWC2	WT:uggt	TRUE	0.1	0.108586	24.8555	16.0166	-8.83891	0	0.00218386	CNAG_07590		V-type proton ATPase subunit C		vacuolar proton-transporting V-type ATPase, V1 domain [GO:0000221]	proton-transporting ATPase activity, rotational mechanism [GO:0046961]
J9VSU3	WT:uggt	TRUE	0.4	0.260663	23.1324	22.3933	-0.73916	0	0.599088	CNAG_02130		RNA-binding protein 39	mRNA processing [GO:0006397]	nucleus [GO:0005634]	RNA binding [GO:0003723]; U1 snRNP binding [GO:1990446]
J9VJJ1	WT:uggt	TRUE	0.1	0.12964	26.153	18.3387	-7.81436	0	0.00444266	CNAG_00655		Large subunit acidic ribosomal protein P1	cytoplasmic translation [GO:0002181]; translational elongation [GO:0006414]	cytosolic large ribosomal subunit [GO:0022625]	protein kinase activator activity [GO:0030295]; ribonucleoprotein complex binding [GO:0043021]; structural constituent of ribosome [GO:0003735]
J9VRM8	WT:uggt	TRUE	0.4	0.212336	25.3377	24.5667	-0.771051	0	0.585991	CNAG_05105		Eukaryotic translation initiation factor 3 subunit L (eIF3l)	formation of cytoplasmic translation initiation complex [GO:0001732]	eukaryotic 43S preinitiation complex [GO:0016282]; eukaryotic 48S preinitiation complex [GO:0033290]; eukaryotic translation initiation factor 3 complex [GO:0005852]	translation initiation factor activity [GO:0003743]
J9VSJ7	WT:uggt	TRUE	0.7	0.176858	22.3558	15.4731	-6.88267	0	0.00847445	CNAG_07414		Pantoate--beta-alanine ligase (EC 6.3.2.1) (Pantoate-activating enzyme) (Pantothenate synthetase)	pantothenate biosynthetic process [GO:0015940]	cytosol [GO:0005829]	ATP binding [GO:0005524]; pantoate-beta-alanine ligase activity [GO:0004592]
T2BQ06	WT:uggt	TRUE	0.2	0.191623	10.6952	11.3449	0.649666	0	1.5688	CNAG_06450		UBA domain-containing protein
J9VSK0	WT:uggt	TRUE	0.7	0.398444	11.0598	14.3198	3.26002	0	9.57996	CNAG_02226		Peptidase M20 domain-containing protein 2	folic acid catabolic process [GO:0046657]	cytoplasm [GO:0005737]	dipeptidase activity [GO:0016805]; para-aminobenzoyl-glutamate hydrolase activity [GO:0071713]
J9W2V2	WT:uggt	TRUE	1	0.995895	11.0398	11.0428	0.00300822	0	1.00209	CNAG_06232		Transcription factor C subunit 7		cytoplasm [GO:0005737]
J9VS63	WT:uggt	TRUE	0.7	0.161959	20.1558	14.4574	-5.69839	0	0.0192581	CNAG_04372		DNA-directed RNA polymerase I, II, and III subunit RPABC2	tRNA transcription by RNA polymerase III [GO:0042797]	RNA polymerase I complex [GO:0005736]; RNA polymerase II, core complex [GO:0005665]; RNA polymerase III complex [GO:0005666]	DNA binding [GO:0003677]; RNA polymerase I activity [GO:0001054]; RNA polymerase II activity [GO:0001055]; RNA polymerase III activity [GO:0001056]
J9VYV7	WT:uggt	TRUE	0.2	0.112025	26.3068	26.0209	-0.28583	0	0.820269	CNAG_04155		Small nuclear ribonucleoprotein E (snRNP-E) (Sm protein E)	spliceosomal snRNP assembly [GO:0000387]	pICln-Sm protein complex [GO:0034715]; precatalytic spliceosome [GO:0071011]; U1 snRNP [GO:0005685]; U2 snRNP [GO:0005686]; U4 snRNP [GO:0005687]; U4/U6 x U5 tri-snRNP complex [GO:0046540]; U5 snRNP [GO:0005682]	RNA binding [GO:0003723]
J9VN21	WT:uggt	TRUE	1	0.746724	11.3962	11.4931	0.0968731	0	1.06945	CNAG_02172		E3 ubiquitin-protein ligase (EC 2.3.2.27)	protein ubiquitination [GO:0016567]; transcription elongation by RNA polymerase II [GO:0006368]; ubiquitin-dependent protein catabolic process via the N-end rule pathway [GO:0071596]	transcription elongation factor complex [GO:0008023]	ligase activity [GO:0016874]; ubiquitin protein ligase activity [GO:0061630]; zinc ion binding [GO:0008270]
J9VTW0	WT:uggt	TRUE	0.7	0.375953	16.2631	11.3721	-4.89101	0	0.0337022	CNAG_05716		Essential protein Yae1 N-terminal domain-containing protein
J9VWH1	WT:uggt	TRUE	1	0.456031	14.2421	11.4928	-2.74934	0	0.148719	CNAG_01561		WD-repeat protein	proteasome-mediated ubiquitin-dependent protein catabolic process [GO:0043161]	GID complex [GO:0034657]
J9VL13	WT:uggt	TRUE	0.2	0.111531	11.6016	19.2521	7.65049	0	200.922	CNAG_02562		Medium-chain specific acyl-CoA dehydrogenase, mitochondrial	fatty acid beta-oxidation using acyl-CoA dehydrogenase [GO:0033539]; medium-chain fatty acid catabolic process [GO:0051793]	mitochondrion [GO:0005739]	flavin adenine dinucleotide binding [GO:0050660]; medium-chain fatty acyl-CoA dehydrogenase activity [GO:0070991]
J9VTW3	WT:uggt	TRUE	0.4	0.376673	22.2669	18.4262	-3.84064	0	0.0697996	CNAG_00982		RRM domain-containing protein			nucleic acid binding [GO:0003676]
J9VQH8	WT:uggt	TRUE	1	0.417387	22.3299	23.8878	1.55786	0	2.94417	CNAG_01273		Cellular nucleic acid-binding protein	positive regulation of cytoplasmic translation [GO:2000767]	cytoplasm [GO:0005737]	mRNA binding [GO:0003729]; single-stranded RNA binding [GO:0003727]; translation regulator activity [GO:0045182]; zinc ion binding [GO:0008270]
J9VYC0	WT:uggt	TRUE	0.4	0.147826	23.368	24.4436	1.07562	0	2.10763	CNAG_07862		Fumarate reductase			FMN binding [GO:0010181]; heme binding [GO:0020037]; metal ion binding [GO:0046872]; oxidoreductase activity [GO:0016491]
J9VKC0	WT:uggt	TRUE	0.4	0.208725	23.4489	23.8724	0.423535	0	1.34121	CNAG_00012		D-xylose 1-dehydrogenase (NADP(+), D-xylono-1,5-lactone-forming) (EC 1.1.1.179) (D-xylose-NADP dehydrogenase)	D-xylose catabolic process [GO:0042843]		D-xylose 1-dehydrogenase (NADP+) activity [GO:0047837]; nucleotide binding [GO:0000166]
J9VJ36	WT:uggt	TRUE	0.1	0.0623708	11.8687	11.4584	-0.41032	0	0.752456	CNAG_05182		GAR domain-containing protein		cytoplasm [GO:0005737]; cytoskeleton [GO:0005856]	microtubule binding [GO:0008017]
J9VJZ9	WT:uggt	TRUE	1	0.482737	22.202	23.2541	1.05209	0	2.07354	CNAG_02926		Uncharacterized protein
J9VKD7	WT:uggt	TRUE	0.1	0.0908465	15.445	23.1188	7.67384	0	204.2	CNAG_01229		L-mandelate dehydrogenase	lactate metabolic process [GO:0006089]		heme binding [GO:0020037]; L-lactate dehydrogenase (cytochrome) activity [GO:0004460]; metal ion binding [GO:0046872]
J9VZK6	WT:uggt	TRUE	0.1	0.0429551	11.8596	10.9323	-0.927308	0	0.525839	CNAG_01903		FHA domain-containing protein
J9VXT6	WT:uggt	TRUE	0.7	0.695339	16.9946	15.2129	-1.78171	0	0.290839	CNAG_05652		Cytoplasmic protein	glucan catabolic process [GO:0009251]	cell surface [GO:0009986]; extracellular region [GO:0005576]	beta-glucosidase activity [GO:0008422]; glucan endo-1,6-beta-glucosidase activity [GO:0046557]
J9VV48	WT:uggt	TRUE	0.7	0.348698	24.313	22.9724	-1.34066	0	0.394839	CNAG_01938		non-specific serine/threonine protein kinase (EC 2.7.11.1)	intracellular signal transduction [GO:0035556]; microtubule cytoskeleton organization [GO:0000226]	cytoplasm [GO:0005737]	ATP binding [GO:0005524]; protein serine kinase activity [GO:0106310]; protein serine/threonine kinase activity [GO:0004674]; tau-protein kinase activity [GO:0050321]
J9VPM3	WT:uggt	TRUE	0.1	0.144885	25.8321	24.9694	-0.862658	0	0.549938	CNAG_03165		Small ribosomal subunit protein mS33		mitochondrion [GO:0005739]; ribonucleoprotein complex [GO:1990904]; ribosome [GO:0005840]
J9VP95	WT:uggt	TRUE	0.1	0.172053	25.9627	19.4607	-6.50199	0	0.0110333	CNAG_00873		Alpha 1,2-mannosyltransferase	mannan biosynthetic process [GO:0046354]; protein mannosylation [GO:0035268]	Golgi apparatus [GO:0005794]	alpha-1,2-mannosyltransferase activity [GO:0000026]
J9W196	WT:uggt	TRUE	0.1	0.148753	19.6373	20.4369	0.799667	0	1.7407	CNAG_01645		BZIP domain-containing protein
J9VXY6	WT:uggt	TRUE	0.1	0.0822193	10.8787	12.0718	1.19306	0	2.28636	CNAG_04750		Pyridoxamine 5'-phosphate oxidase Alr4036 family FMN-binding domain-containing protein			FMN binding [GO:0010181]
J9VWS7	WT:uggt	TRUE	0.4	0.778363	18.9507	17.5276	-1.42312	0	0.372905	CNAG_07595		Uncharacterized protein
J9VNZ9	WT:uggt	TRUE	0.4	0.115551	18.6422	11.9694	-6.67275	0	0.00980173	CNAG_06678		Enzyme activator
J9VRA0	WT:uggt	TRUE	1	0.779391	11.1701	11.3655	0.19539	0	1.14503	CNAG_06616		RED-like N-terminal domain-containing protein	mRNA splicing, via spliceosome [GO:0000398]	nucleus [GO:0005634]
J9VN83	WT:uggt	TRUE	0.2	0.102278	27.194	26.6169	-0.577168	0	0.670278	CNAG_07554	CAP10	Capsular associated protein	protein O-linked glycosylation [GO:0006493]	endomembrane system [GO:0012505]	UDP-glucosyltransferase activity [GO:0035251]; UDP-xylosyltransferase activity [GO:0035252]
J9W0G1	WT:uggt	TRUE	0.4	0.119505	11.4398	12.0819	0.642098	0	1.5606	CNAG_04688		Acyl-CoA dehydrogenase	fatty acid beta-oxidation using acyl-CoA dehydrogenase [GO:0033539]	mitochondrion [GO:0005739]	acyl-CoA dehydrogenase activity [GO:0003995]; flavin adenine dinucleotide binding [GO:0050660]
J9VXA2	WT:uggt	TRUE	0.2	0.114426	23.9862	15.4674	-8.51877	0	0.00272643	CNAG_05661		FACT complex subunit POB3	DNA repair [GO:0006281]; DNA replication [GO:0006260]; regulation of chromatin organization [GO:1902275]	FACT complex [GO:0035101]	DNA binding [GO:0003677]; histone binding [GO:0042393]; nucleosome binding [GO:0031491]
J9VUG0	WT:uggt	TRUE	0.7	0.754372	25.804	26.4771	0.673083	0	1.59448	CNAG_05935		Uridylate kinase (UK) (EC 2.7.4.14) (ATP:UMP phosphotransferase) (Deoxycytidylate kinase) (CK) (dCMP kinase) (Uridine monophosphate kinase) (UMP kinase) (UMPK)	'de novo' pyrimidine nucleobase biosynthetic process [GO:0006207]; CDP biosynthetic process [GO:0046705]; UDP biosynthetic process [GO:0006225]	cytosol [GO:0005829]; nucleus [GO:0005634]	adenylate kinase activity [GO:0004017]; ATP binding [GO:0005524]; cytidylate kinase activity [GO:0004127]; nucleoside diphosphate kinase activity [GO:0004550]; UMP kinase activity [GO:0033862]
J9VY09	WT:uggt	TRUE	0.4	0.34753	27.1424	21.5175	-5.62492	0	0.0202642	CNAG_03375		Succinate--CoA ligase [ADP-forming] subunit alpha, mitochondrial (EC 6.2.1.5) (Succinyl-CoA synthetase subunit alpha) (SCS-alpha)	tricarboxylic acid cycle [GO:0006099]	cytosol [GO:0005829]; mitochondrion [GO:0005739]; succinate-CoA ligase complex (ADP-forming) [GO:0009361]	nucleotide binding [GO:0000166]; succinate-CoA ligase (ADP-forming) activity [GO:0004775]; succinate-CoA ligase (GDP-forming) activity [GO:0004776]
J9VV50	WT:uggt	TRUE	0.1	0.0642308	27.3123	25.9122	-1.40012	0	0.378898	CNAG_07839		Large subunit ribosomal protein L11	translation [GO:0006412]	cytosolic large ribosomal subunit [GO:0022625]	RNA binding [GO:0003723]; structural constituent of ribosome [GO:0003735]
J9W1Y7	WT:uggt	TRUE	0.7	0.154183	18.5432	11.8967	-6.64654	0	0.00998142	CNAG_05596		Nuclear transport factor 2 (NTF-2)	mRNA transport [GO:0051028]; protein import into nucleus [GO:0006606]	cytoplasm [GO:0005737]; nuclear pore central transport channel [GO:0044613]	nuclear import signal receptor activity [GO:0061608]
J9VHN1	WT:uggt	TRUE	0.7	0.155538	24.7511	26.172	1.42094	0	2.6776	CNAG_00746		Capsular associated protein
J9VFX5	WT:uggt	TRUE	0.1	0.230585	25.6934	19.4224	-6.27099	0	0.0129492	CNAG_00115		Chlorophyll synthesis pathway protein BchC	sorbitol catabolic process [GO:0006062]		L-iditol 2-dehydrogenase activity [GO:0003939]; zinc ion binding [GO:0008270]
J9VJ23	WT:uggt	TRUE	0.1	0.0825082	25.4795	23.5316	-1.94791	0	0.259191	CNAG_05167		SMP domain-containing protein
J9W055	WT:uggt	TRUE	0.2	0.229134	22.0971	21.8002	-0.296827	0	0.814041	CNAG_04835		Dihydrodipicolinate synthase			4-hydroxy-tetrahydrodipicolinate synthase activity [GO:0008840]
J9VZA0	WT:uggt	TRUE	0.1	0.235864	25.4567	19.8203	-5.63635	0	0.0201043	CNAG_01761		MARVEL domain-containing protein		membrane [GO:0016020]
J9VL86	WT:uggt	TRUE	1	0.75034	11.7045	11.4944	-0.210074	0	0.864493	CNAG_01142		Endoplasmic reticulum protein	lipid transport [GO:0006869]	endoplasmic reticulum [GO:0005783]; membrane [GO:0016020]	lipid binding [GO:0008289]
J9VRD0	WT:uggt	TRUE	1	0.921551	11.2088	11.1387	-0.0700966	0	0.952574	CNAG_04277		Signal transduction-related protein	cellular response to phosphate starvation [GO:0016036]; phosphate ion transport [GO:0006817]	plasma membrane [GO:0005886]; trans-Golgi network [GO:0005802]	inositol hexakisphosphate binding [GO:0000822]
J9VUH0	WT:uggt	TRUE	0.7	0.6042	25.7317	26.0246	0.29294	0	1.22513	CNAG_04320		Polysaccharide synthase Cps1p		membrane [GO:0016020]	glycosyltransferase activity [GO:0016757]
J9W473	WT:uggt	TRUE	0.1	0.140538	22.4971	16.9434	-5.55367	0	0.0212901	CNAG_05607		Cytoplasmic protein	ergosteryl 3-beta-D-glucoside catabolic process [GO:1904462]		steryl-beta-glucosidase activity [GO:0050295]
J9VQK9	WT:uggt	TRUE	0.1	0.107632	27.8463	19.3234	-8.52286	0	0.00271871	CNAG_03322	USX1	UDP-glucuronic acid decarboxylase 1 (EC 4.1.1.35) (UDP-glucuronate decarboxylase 1)	D-xylose metabolic process [GO:0042732]; UDP-D-xylose biosynthetic process [GO:0033320]	Golgi cisterna membrane [GO:0032580]	NAD+ binding [GO:0070403]; UDP-glucuronate decarboxylase activity [GO:0048040]
J9VZR6	WT:uggt	TRUE	0.1	0.0716033	26.3805	24.8922	-1.48835	0	0.356419	CNAG_05496		2-isopropylmalate synthase (EC 2.3.3.13)	L-leucine biosynthetic process [GO:0009098]	mitochondrion [GO:0005739]	2-isopropylmalate synthase activity [GO:0003852]; metal ion binding [GO:0046872]
J9W2C4	WT:uggt	TRUE	0.1	0.038584	23.6704	23.1363	-0.534122	0	0.690579	CNAG_06036		Aminotransferase class V domain-containing protein
J9VUV2	WT:uggt	TRUE	1	0.425854	26.2286	24.9693	-1.25938	0	0.417723	CNAG_02354		Large subunit ribosomal protein L2	cytoplasmic translation [GO:0002181]; mitochondrial translation [GO:0032543]	cytosolic large ribosomal subunit [GO:0022625]; mitochondrial large ribosomal subunit [GO:0005762]	RNA binding [GO:0003723]; structural constituent of ribosome [GO:0003735]
Q8X226	WT:uggt	TRUE	1	0.970157	15.1246	15.3204	0.195805	0	1.14536	CNAG_07937	CAS1	Probable O-acetyltransferase CAS1 (EC 2.3.1.-) (Capsule synthesis protein 1)	plant-type secondary cell wall biogenesis [GO:0009834]; xylan acetylation [GO:1990937]; xylan biosynthetic process [GO:0045492]; xyloglucan metabolic process [GO:0010411]	Golgi apparatus [GO:0005794]; membrane [GO:0016020]	N-acetylneuraminate 7-O(or 9-O)-acetyltransferase activity [GO:0047186]; oxidoreductase activity [GO:0016491]
J9VP14	WT:uggt	TRUE	1	0.561632	17.4529	14.6747	-2.77815	0	0.145779	CNAG_03905		Transcription elongation factor 1 homolog	transcription elongation by RNA polymerase II [GO:0006368]	transcription elongation factor complex [GO:0008023]	metal ion binding [GO:0046872]; RNA polymerase II complex binding [GO:0000993]
T2BLW8	WT:uggt	TRUE	0.7	0.422362	22.7961	19.5022	-3.29388	0	0.101963	CNAG_02941		PARP-type domain-containing protein		nucleus [GO:0005634]	DNA binding [GO:0003677]; zinc ion binding [GO:0008270]
J9VMF5	WT:uggt	TRUE	0.1	0.00831086	19.4801	20.4213	0.941186	0	1.92011	CNAG_07647		Chloride channel protein		early endosome [GO:0005769]; Golgi apparatus [GO:0005794]; membrane [GO:0016020]	voltage-gated chloride channel activity [GO:0005247]
J9VN97	WT:uggt	TRUE	0.1	0.0843637	24.8866	15.8167	-9.0699	0	0.00186075	CNAG_02081	MNS1	alpha-1,2-Mannosidase (EC 3.2.1.-)	carbohydrate metabolic process [GO:0005975]	endoplasmic reticulum [GO:0005783]; endosome [GO:0005768]; membrane [GO:0016020]; trans-Golgi network [GO:0005802]	calcium ion binding [GO:0005509]; mannosyl-oligosaccharide 1,2-alpha-mannosidase activity [GO:0004571]
J9VZ50	WT:uggt	TRUE	0.7	0.494136	11.2575	11.6723	0.414829	0	1.33314	CNAG_06506		HCNGP-like protein-domain-containing protein	regulation of DNA-templated transcription [GO:0006355]	nucleus [GO:0005634]
J9VJV8	WT:uggt	TRUE	0.1	0.0978462	25.147	23.9373	-1.20962	0	0.432382	CNAG_01391		Hsp90 chaperone protein kinase-targeting subunit	cell division [GO:0051301]; protein folding [GO:0006457]; protein stabilization [GO:0050821]	cytoplasm [GO:0005737]	heat shock protein binding [GO:0031072]; protein kinase binding [GO:0019901]; protein-folding chaperone binding [GO:0051087]; unfolded protein binding [GO:0051082]
J9VJ24	WT:uggt	TRUE	0.1	0.105601	26.6426	25.5209	-1.12176	0	0.459533	CNAG_04962		M protein repeat protein
J9VR33	WT:uggt	TRUE	0.1	0.229973	24.4745	19.1852	-5.28934	0	0.0255712	CNAG_03510		60S ribosomal protein L36	cytoplasmic translation [GO:0002181]	cytosolic large ribosomal subunit [GO:0022625]	structural constituent of ribosome [GO:0003735]
J9VLN2	WT:uggt	TRUE	1	0.48355	14.7361	11.647	-3.08908	0	0.117515	CNAG_00468		AMP-dependent synthetase/ligase domain-containing protein	long-chain fatty-acyl-CoA biosynthetic process [GO:0035338]; positive regulation of long-chain fatty acid import across plasma membrane [GO:0010747]	endoplasmic reticulum [GO:0005783]; membrane [GO:0016020]; mitochondrion [GO:0005739]	arachidonate-CoA ligase activity [GO:0047676]
J9VRS6	WT:uggt	TRUE	0.7	0.150091	11.6271	19.1736	7.54652	0	186.951	CNAG_05797		5'-3' exoribonuclease (EC 3.1.13.-)	DNA-templated transcription termination [GO:0006353]; mRNA processing [GO:0006397]	nucleus [GO:0005634]	5'-3' RNA exonuclease activity [GO:0004534]; nucleic acid binding [GO:0003676]; zinc ion binding [GO:0008270]
J9VIG8	WT:uggt	TRUE	0.1	0.0232256	25.6432	25.1317	-0.511485	0	0.7015	CNAG_03701		Pentafunctional AROM polypeptide [Includes: 3-dehydroquinate synthase (DHQS) (EC 4.2.3.4); 3-phosphoshikimate 1-carboxyvinyltransferase (EC 2.5.1.19) (5-enolpyruvylshikimate-3-phosphate synthase) (EPSP synthase) (EPSPS); Shikimate kinase (SK) (EC 2.7.1.71); 3-dehydroquinate dehydratase (3-dehydroquinase) (EC 4.2.1.10); Shikimate dehydrogenase (EC 1.1.1.25)]	amino acid biosynthetic process [GO:0008652]; aromatic amino acid family biosynthetic process [GO:0009073]; chorismate biosynthetic process [GO:0009423]	cytoplasm [GO:0005737]	3-dehydroquinate dehydratase activity [GO:0003855]; 3-dehydroquinate synthase activity [GO:0003856]; 3-phosphoshikimate 1-carboxyvinyltransferase activity [GO:0003866]; ATP binding [GO:0005524]; metal ion binding [GO:0046872]; shikimate 3-dehydrogenase (NADP+) activity [GO:0004764]; shikimate kinase activity [GO:0004765]
J9VN96	WT:uggt	TRUE	0.7	0.454801	26.1621	25.2302	-0.93199	0	0.524135	CNAG_01261		Myosin I binding protein
J9VN14	WT:uggt	TRUE	0.7	0.651589	10.7288	10.9446	0.21581	0	1.16136	CNAG_02720		Nuclear GTP-binding protein		nucleolus [GO:0005730]	GTP binding [GO:0005525]
J9VTJ1	WT:uggt	TRUE	0.1	0.0533665	28.8561	25.6912	-3.16495	0	0.111495	CNAG_01111		Eukaryotic translation initiation factor 3 subunit K (eIF3k) (eIF-3 p25)	formation of cytoplasmic translation initiation complex [GO:0001732]; regulation of translational initiation [GO:0006446]	eukaryotic 43S preinitiation complex [GO:0016282]; eukaryotic 48S preinitiation complex [GO:0033290]; eukaryotic translation initiation factor 3 complex [GO:0005852]	ribosome binding [GO:0043022]; RNA binding [GO:0003723]; translation initiation factor activity [GO:0003743]
J9VTU1	WT:uggt	TRUE	0.1	0.0777751	11.2938	15.483	4.18917	0	18.2417	CNAG_01471		Mitochondrial protein	mitochondrial respiratory chain complex III assembly [GO:0034551]	mitochondrion [GO:0005739]
J9VKZ8	WT:uggt	TRUE	0.1	0.0870917	10.4824	11.512	1.02959	0	2.04145	CNAG_01248		Vacuole morphology and inheritance protein 14	phosphatidylinositol biosynthetic process [GO:0006661]	endosome membrane [GO:0010008]; fungal-type vacuole membrane [GO:0000329]; PAS complex [GO:0070772]
J9VXF1	WT:uggt	TRUE	0.2	0.0947052	30.0696	28.9913	-1.07826	0	0.473601	CNAG_01890		5-methyltetrahydropteroyltriglutamate--homocysteine S-methyltransferase (EC 2.1.1.14)	methylation [GO:0032259]	cytosol [GO:0005829]; extracellular region [GO:0005576]	5-methyltetrahydropteroyltriglutamate-homocysteine S-methyltransferase activity [GO:0003871]; methionine synthase activity [GO:0008705]; zinc ion binding [GO:0008270]
J9VHL5	WT:uggt	TRUE	0.7	0.787139	24.6578	24.3859	-0.271848	0	0.828258	CNAG_02811		Small subunit ribosomal protein S29	translation [GO:0006412]	cytosolic small ribosomal subunit [GO:0022627]	structural constituent of ribosome [GO:0003735]; zinc ion binding [GO:0008270]
J9VGK3	WT:uggt	TRUE	0.1	0.0165163	24.6321	25.4609	0.828812	0	1.77622	CNAG_04017		Peptide-methionine (R)-S-oxide reductase (EC 1.8.4.12)	protein repair [GO:0030091]; response to oxidative stress [GO:0006979]		metal ion binding [GO:0046872]; peptide-methionine (R)-S-oxide reductase activity [GO:0033743]
J9VR06	WT:uggt	TRUE	0.7	0.41181	21.6151	18.148	-3.46712	0	0.0904261	CNAG_01107		1-acyl-sn-glycerol-3-phosphate acyltransferase (EC 2.3.1.51)	GPI anchor biosynthetic process [GO:0006506]	glycosylphosphatidylinositol-N-acetylglucosaminyltransferase (GPI-GnT) complex [GO:0000506]	1-acylglycerol-3-phosphate O-acyltransferase activity [GO:0003841]; phosphatidylinositol N-acetylglucosaminyltransferase activity [GO:0017176]
J9W250	WT:uggt	TRUE	0.7	0.469708	18.9341	15.5587	-3.37542	0	0.0963605	CNAG_02000		Short-chain dehydrogenase			oxidoreductase activity, acting on NAD(P)H, oxygen as acceptor [GO:0050664]
J9VRN7	WT:uggt	TRUE	0.7	0.308014	24.2144	23.488	-0.726419	0	0.604402	CNAG_04163		Proteophosphoglycan ppg4
J9VIE2	WT:uggt	TRUE	0.1	0.249309	25.5047	24.736	-0.768733	0	0.586933	CNAG_04951		Phospho-2-dehydro-3-deoxyheptonate aldolase (EC 2.5.1.54)	amino acid biosynthetic process [GO:0008652]; aromatic amino acid family biosynthetic process [GO:0009073]	cytoplasm [GO:0005737]	3-deoxy-7-phosphoheptulonate synthase activity [GO:0003849]
J9VPH1	WT:uggt	TRUE	0.4	0.367309	19.9231	23.8788	3.95567	0	15.5158	CNAG_04090		Activating transcription factor			DNA-binding transcription factor activity, RNA polymerase II-specific [GO:0000981]; RNA polymerase II cis-regulatory region sequence-specific DNA binding [GO:0000978]
J9W020	WT:uggt	TRUE	0.1	0.0646493	24.0267	14.7334	-9.29331	0	0.00159381	CNAG_05635		Large subunit ribosomal protein L19	translation [GO:0006412]	cytosolic large ribosomal subunit [GO:0022625]; mitochondrial large ribosomal subunit [GO:0005762]	structural constituent of ribosome [GO:0003735]
J9VX39	WT:uggt	TRUE	0.4	0.325909	14.8846	10.9879	-3.8967	0	0.0671393	CNAG_04469		4-aminobutyrate transaminase		mitochondrial matrix [GO:0005759]	identical protein binding [GO:0042802]; pyridoxal phosphate binding [GO:0030170]; transaminase activity [GO:0008483]
J9W0Q9	WT:uggt	TRUE	0.7	0.405319	26.8855	26.1761	-0.709357	0	0.611593	CNAG_04577		Nucleoside diphosphate kinase (EC 2.7.4.6)	CTP biosynthetic process [GO:0006241]; GTP biosynthetic process [GO:0006183]; UTP biosynthetic process [GO:0006228]		nucleoside diphosphate kinase activity [GO:0004550]
J9W1P3	WT:uggt	TRUE	1	0.62594	24.2552	24.5029	0.247657	0	1.18728	CNAG_05469		RING-type E3 ubiquitin transferase (EC 2.3.2.27)	protein ubiquitination [GO:0016567]	endoplasmic reticulum membrane [GO:0005789]	ubiquitin-protein transferase activity [GO:0004842]; zinc ion binding [GO:0008270]
J9VM39	WT:uggt	TRUE	0.1	0.0786559	22.8136	15.1593	-7.65424	0	0.00496414	CNAG_00632		PRA1 family protein	vesicle-mediated transport [GO:0016192]	endoplasmic reticulum [GO:0005783]; Golgi apparatus [GO:0005794]; membrane [GO:0016020]
J9VRT0	WT:uggt	TRUE	1	0.398986	24.2799	23.6937	-0.58623	0	0.666081	CNAG_05120		Nicotinate phosphoribosyltransferase (EC 6.3.4.21)	NAD salvage [GO:0034355]	cytosol [GO:0005829]	glycosyltransferase activity [GO:0016757]; nicotinate phosphoribosyltransferase activity [GO:0004516]
J9VTG4	WT:uggt	TRUE	0.1	0.0931887	24.9959	23.9396	-1.05634	0	0.48085	CNAG_01542		Taurine catabolism dioxygenase TauD	organic cyclic compound metabolic process [GO:1901360]		dioxygenase activity [GO:0051213]; metal ion binding [GO:0046872]
J9VEL9	WT:uggt	TRUE	0.7	0.404082	11.8477	12.0687	0.220957	0	1.16551	CNAG_07353		26S proteasome non-ATPase regulatory subunit 9	proteasome regulatory particle assembly [GO:0070682]	cytoplasm [GO:0005737]; nucleus [GO:0005634]; proteasome complex [GO:0000502]
J9VU45	WT:uggt	TRUE	0.7	0.267613	25.51	25.8782	0.368196	0	1.29074	CNAG_00874		Multisite-specific tRNA:(Cytosine-C5)-methyltransferase	tRNA methylation [GO:0030488]	cytoplasm [GO:0005737]; nucleus [GO:0005634]	tRNA (cytidine-5-)-methyltransferase activity [GO:0016428]; tRNA binding [GO:0000049]
J9VLL0	WT:uggt	TRUE	0.7	0.430804	12.9802	11.4773	-1.50289	0	0.352845	CNAG_02468		AP-3 complex subunit delta	anterograde synaptic vesicle transport [GO:0048490]; Golgi to vacuole transport [GO:0006896]; protein targeting to vacuole [GO:0006623]; synaptic vesicle membrane organization [GO:0048499]	AP-3 adaptor complex [GO:0030123]; endosome membrane [GO:0010008]; Golgi apparatus [GO:0005794]
J9VQW3	WT:uggt	TRUE	1	0.943213	11.2661	11.3183	0.0521193	0	1.03679	CNAG_01161		Uncharacterized protein			racemase activity, acting on amino acids and derivatives [GO:0036361]
J9W0X7	WT:uggt	TRUE	0.1	0.324263	24.9048	20.3129	-4.59192	0	0.0414661	CNAG_01510		Nucleoporin POM152	nuclear pore organization [GO:0006999]; protein import into nucleus [GO:0006606]	membrane [GO:0016020]; nuclear pore transmembrane ring [GO:0070762]	structural constituent of nuclear pore [GO:0017056]
J9VJ06	WT:uggt	TRUE	0.2	0.0989973	24.9384	25.1293	0.190894	0	1.14147	CNAG_00447		CCT-beta		chaperonin-containing T-complex [GO:0005832]	ATP binding [GO:0005524]; ATP hydrolysis activity [GO:0016887]; ATP-dependent protein folding chaperone [GO:0140662]; unfolded protein binding [GO:0051082]
J9VIC5	WT:uggt	TRUE	0.7	0.894905	11.3406	11.4504	0.109775	0	1.07906	CNAG_02769		Membrane insertase YidC/Oxa/ALB C-terminal domain-containing protein	mitochondrial cytochrome c oxidase assembly [GO:0033617]; protein insertion into mitochondrial inner membrane from matrix [GO:0032979]	mitochondrial inner membrane [GO:0005743]	membrane insertase activity [GO:0032977]
J9VIN6	WT:uggt	TRUE	1	0.380507	11.4602	14.8856	3.42538	0	10.7434	CNAG_00300		Spindle pole body component	cytoplasmic microtubule organization [GO:0031122]; meiotic cell cycle [GO:0051321]; microtubule nucleation [GO:0007020]; mitotic cell cycle [GO:0000278]; spindle assembly [GO:0051225]	cytoplasm [GO:0005737]; equatorial microtubule organizing center [GO:0000923]; gamma-tubulin complex [GO:0000930]; microtubule [GO:0005874]; mitotic spindle pole body [GO:0044732]; spindle pole [GO:0000922]	gamma-tubulin binding [GO:0043015]; microtubule minus-end binding [GO:0051011]
J9VY72	WT:uggt	TRUE	1	0.982825	11.6196	11.6116	-0.00805227	0	0.994434	CNAG_03440		Uncharacterized protein
J9VZR7	WT:uggt	TRUE	1	0.784966	11.5635	11.3174	-0.246123	0	0.843159	CNAG_01985		Uncharacterized protein		membrane [GO:0016020]
J9VEN4	WT:uggt	TRUE	1	0.434086	15.1243	11.9184	-3.20592	0	0.108373	CNAG_00363		Two-component system sensor protein			ATP binding [GO:0005524]; histidine phosphotransfer kinase activity [GO:0009927]; phosphorelay sensor kinase activity [GO:0000155]
J9VXQ2	WT:uggt	TRUE	0.4	0.368992	24.2802	20.1713	-4.10882	0	0.0579592	CNAG_02001		Inositol-polyphosphate 5-phosphatase	phosphatidylinositol dephosphorylation [GO:0046856]	membrane [GO:0016020]	inositol-polyphosphate 5-phosphatase activity [GO:0004445]; phosphatidylinositol-3,4,5-trisphosphate 5-phosphatase activity [GO:0034485]; phosphatidylinositol-4,5-bisphosphate 5-phosphatase activity [GO:0004439]
J9VWT4	WT:uggt	TRUE	0.1	0.112096	27.591	27.0621	-0.528869	0	0.693098	CNAG_05462		cytochrome-b5 reductase (EC 1.6.2.2)	ergosterol biosynthetic process [GO:0006696]	mitochondrial outer membrane [GO:0005741]	cytochrome-b5 reductase activity, acting on NAD(P)H [GO:0004128]
J9VS07	WT:uggt	TRUE	0.4	0.483734	25.2121	24.8153	-0.396765	0	0.75956	CNAG_04312	MAN1	Mannose-6-phosphate isomerase (EC 5.3.1.8)	carbohydrate metabolic process [GO:0005975]; GDP-mannose biosynthetic process [GO:0009298]	cytosol [GO:0005829]	mannose-6-phosphate isomerase activity [GO:0004476]; zinc ion binding [GO:0008270]
J9W0I8	WT:uggt	TRUE	0.1	0.322042	24.3221	19.3798	-4.94236	0	0.0325239	CNAG_04657		Short-chain dehydrogenase
J9VTM3	WT:uggt	TRUE	0.1	0.0933403	24.9157	24.6044	-0.311277	0	0.805928	CNAG_01598		Template-activating factor I	nucleosome assembly [GO:0006334]	chromatin [GO:0000785]; nucleus [GO:0005634]	chromatin binding [GO:0003682]; histone binding [GO:0042393]
J9VUC4	WT:uggt	TRUE	0.1	0.0634402	14.5864	22.7151	8.12866	0	279.88	CNAG_01852		CCR4-NOT transcription complex subunit 2	nuclear-transcribed mRNA poly(A) tail shortening [GO:0000289]; regulation of DNA-templated transcription [GO:0006355]	CCR4-NOT core complex [GO:0030015]; P-body [GO:0000932]
J9VWW9	WT:uggt	TRUE	0.2	0.127901	27.8276	26.6569	-1.17067	0	0.444216	CNAG_04388	SOD2	Superoxide dismutase [Mn], mitochondrial (EC 1.15.1.1)	removal of superoxide radicals [GO:0019430]; symbiont defense to host-produced reactive oxygen species [GO:0052164]	cytosol [GO:0005829]; mitochondrion [GO:0005739]	metal ion binding [GO:0046872]; superoxide dismutase activity [GO:0004784]
J9VLW7	WT:uggt	TRUE	0.2	0.140165	24.2378	23.9037	-0.334092	0	0.793283	CNAG_04089		Coatomer subunit zeta	intra-Golgi vesicle-mediated transport [GO:0006891]; intracellular protein transport [GO:0006886]; retrograde vesicle-mediated transport, Golgi to endoplasmic reticulum [GO:0006890]	COPI vesicle coat [GO:0030126]; Golgi membrane [GO:0000139]
J9VLQ3	WT:uggt	TRUE	0.2	0.134797	10.6756	11.5346	0.858979	0	1.81375	CNAG_04014		26S proteasome regulatory subunit N9	ubiquitin-dependent protein catabolic process [GO:0006511]	cytosol [GO:0005829]; nucleus [GO:0005634]; proteasome regulatory particle, lid subcomplex [GO:0008541]	structural molecule activity [GO:0005198]
J9VPU1	WT:uggt	TRUE	0.2	0.334688	27.4587	26.3118	-1.14693	0	0.451584	CNAG_03251		ADP-ribosylation factor	intracellular protein transport [GO:0006886]; vesicle-mediated transport [GO:0016192]	Golgi apparatus [GO:0005794]; plasma membrane [GO:0005886]	GTP binding [GO:0005525]; GTPase activity [GO:0003924]
J9VE80	WT:uggt	TRUE	0.1	0.0610675	26.5586	15.6926	-10.866	0	0.000535796	CNAG_00485		Uncharacterized protein		membrane [GO:0016020]
J9VQ88	WT:uggt	TRUE	0.7	0.13213	23.4215	15.4167	-8.00478	0	0.00389332	CNAG_03162		Vacuolar protein	negative regulation of apoptotic process [GO:0043066]	membrane [GO:0016020]
J9VVD3	WT:uggt	TRUE	0.7	0.613398	23.9895	24.1973	0.207805	0	1.15493	CNAG_02145		Uncharacterized protein		ribonucleoprotein complex [GO:1990904]; ribosome [GO:0005840]
J9VQH5	WT:uggt	TRUE	0.2	0.11706	23.7439	15.439	-8.30494	0	0.00316202	CNAG_02149		Succinate dehydrogenase assembly factor 4, mitochondrial	mitochondrial respiratory chain complex II assembly [GO:0034553]	mitochondrion [GO:0005739]
J9VKW5	WT:uggt	TRUE	1	0.806738	26.7798	26.7392	-0.0406008	0	0.97225	CNAG_00184		Pre-mRNA cleavage complex 2 protein Pcf11	mRNA 3'-end processing [GO:0031124]; termination of RNA polymerase II transcription [GO:0006369]	cytoplasm [GO:0005737]; mRNA cleavage factor complex [GO:0005849]	mRNA binding [GO:0003729]; RNA polymerase II complex binding [GO:0000993]
J9W480	WT:uggt	TRUE	1	0.560664	25.3864	25.4866	0.100191	0	1.07192	CNAG_05615	SSO1	Syntaxin 1B/2/3	exocytosis [GO:0006887]; intracellular protein transport [GO:0006886]; vesicle docking [GO:0048278]	endomembrane system [GO:0012505]; plasma membrane [GO:0005886]; SNARE complex [GO:0031201]	SNAP receptor activity [GO:0005484]; SNARE binding [GO:0000149]
J9VRC6	WT:uggt	TRUE	1	0.966336	26.4853	26.4924	0.00708168	0	1.00492	CNAG_04272		CAMK/CAMK1 protein kinase	cellular response to oxidative stress [GO:0034599]		ATP binding [GO:0005524]; calmodulin binding [GO:0005516]; calmodulin-dependent protein kinase activity [GO:0004683]
T2BP03	WT:uggt	TRUE	0.1	0.207987	29.1895	26.887	-2.30253	0	0.202707	CNAG_05650		ubiquitinyl hydrolase 1 (EC 3.4.19.12)	proteolysis [GO:0006508]; regulation of protein stability [GO:0031647]	cytosol [GO:0005829]; nucleus [GO:0005634]	cysteine-type deubiquitinase activity [GO:0004843]
J9VK25	WT:uggt	TRUE	1	0.703107	11.3591	11.5772	0.218098	0	1.1632	CNAG_00803		Solute carrier family 24 (Sodium/potassium/calcium exchanger), member 6	calcium export from the mitochondrion [GO:0099093]; intracellular calcium ion homeostasis [GO:0006874]	membrane [GO:0016020]	calcium:sodium antiporter activity [GO:0005432]
J9VX06	WT:uggt	TRUE	0.1	0.102261	22.0132	14.5572	-7.45604	0	0.00569517	CNAG_01708		GATA-type domain-containing protein	regulation of DNA-templated transcription [GO:0006355]		sequence-specific DNA binding [GO:0043565]; zinc ion binding [GO:0008270]
J9VRI0	WT:uggt	TRUE	0.7	0.37069	14.855	11.4758	-3.3792	0	0.096108	CNAG_05678		Membrane protein		plasma membrane [GO:0005886]	acetate transmembrane transporter activity [GO:0015123]
J9VP74	WT:uggt	TRUE	0.1	0.223176	26.1031	19.9114	-6.19171	0	0.0136807	CNAG_00894		F-type H+-transporting ATPase subunit epsilon		mitochondrial proton-transporting ATP synthase complex, catalytic sector F(1) [GO:0000275]	proton-transporting ATP synthase activity, rotational mechanism [GO:0046933]
J9VKA9	WT:uggt	TRUE	0.7	0.748365	27.7799	27.6587	-0.121118	0	0.919475	CNAG_07004		Dihydrolipoyl dehydrogenase (EC 1.8.1.4)		mitochondrion [GO:0005739]; oxoglutarate dehydrogenase complex [GO:0045252]	dihydrolipoyl dehydrogenase activity [GO:0004148]; flavin adenine dinucleotide binding [GO:0050660]
J9VIB3	WT:uggt	TRUE	1	0.983157	22.2307	22.2423	0.0116944	0	1.00814	CNAG_06930		Translation machinery-associated protein 7
J9VT22	WT:uggt	TRUE	1	0.970546	16.8206	16.544	-0.276554	0	0.82556	CNAG_04612		Uncharacterized protein	mitochondrial respiratory chain complex I assembly [GO:0032981]	mitochondrial respiratory chain complex I [GO:0005747]
J9VK16	WT:uggt	TRUE	0.4	0.352993	22.5701	18.5868	-3.98322	0	0.0632311	CNAG_00793		DNA-directed RNA polymerases I, II, and III subunit RPABC1		RNA polymerase I complex [GO:0005736]; RNA polymerase II, core complex [GO:0005665]; RNA polymerase III complex [GO:0005666]	DNA binding [GO:0003677]; RNA polymerase I activity [GO:0001054]; RNA polymerase II activity [GO:0001055]; RNA polymerase III activity [GO:0001056]
J9VZX1	WT:uggt	TRUE	1	0.523325	11.9176	11.5314	-0.386195	0	0.765145	CNAG_06001		Phosphomevalonate kinase (EC 2.7.4.2)	ergosterol biosynthetic process [GO:0006696]; farnesyl diphosphate biosynthetic process, mevalonate pathway [GO:0010142]; isopentenyl diphosphate biosynthetic process, mevalonate pathway [GO:0019287]	peroxisome [GO:0005777]	ATP binding [GO:0005524]; phosphomevalonate kinase activity [GO:0004631]
J9VIB7	WT:uggt	TRUE	1	0.403419	11.5934	15.2067	3.61333	0	12.2383	CNAG_03646		1-(5-phosphoribosyl)-5-[(5-phosphoribosylamino)methylideneamino] imidazole-4-carboxamide isomerase (EC 5.3.1.16) (5-proFAR isomerase) (Phosphoribosylformimino-5-aminoimidazole carboxamide ribotide isomerase)	histidine biosynthetic process [GO:0000105]; tryptophan biosynthetic process [GO:0000162]	cytoplasm [GO:0005737]	1-(5-phosphoribosyl)-5-[(5-phosphoribosylamino)methylideneamino]imidazole-4-carboxamide isomerase activity [GO:0003949]
J9VJ00	WT:uggt	TRUE	0.7	0.990601	17.8722	17.9356	0.0634381	0	1.04495	CNAG_05137		ER lumen protein-retaining receptor	endoplasmic reticulum to Golgi vesicle-mediated transport [GO:0006888]; protein retention in ER lumen [GO:0006621]; protein transport [GO:0015031]	cis-Golgi network [GO:0005801]; endoplasmic reticulum membrane [GO:0005789]	ER retention sequence binding [GO:0046923]
J9VVN1	WT:uggt	TRUE	0.1	0.0462787	22.9498	23.7625	0.812765	0	1.75658	CNAG_04771		Rab family protein		endosome [GO:0005768]; Golgi apparatus [GO:0005794]	GTP binding [GO:0005525]; GTPase activity [GO:0003924]
J9VP12	WT:uggt	TRUE	0.1	0.0920332	21.176	15.0107	-6.16525	0	0.013934	CNAG_06691		Tuftelin-interacting protein 11	spliceosomal complex disassembly [GO:0000390]	U2-type post-mRNA release spliceosomal complex [GO:0071008]	nucleic acid binding [GO:0003676]
J9VIZ5	WT:uggt	TRUE	0.7	0.147792	22.608	15.5932	-7.01477	0	0.00773292	CNAG_05132		Cytochrome c oxidase subunit 5b	mitochondrial electron transport, cytochrome c to oxygen [GO:0006123]	mitochondrial respiratory chain complex IV [GO:0005751]	metal ion binding [GO:0046872]
J9VM63	WT:uggt	TRUE	0.2	0.100005	11.0585	18.4429	7.3844	0	167.081	CNAG_02495		Cytoplasmic protein
J9VHN5	WT:uggt	TRUE	1	0.95876	25.9033	25.8492	-0.0541273	0	0.963177	CNAG_02780	BNA5	Kynureninase (EC 3.7.1.3) (Biosynthesis of nicotinic acid protein 5) (L-kynurenine hydrolase)	'de novo' NAD biosynthetic process from tryptophan [GO:0034354]; anthranilate metabolic process [GO:0043420]; L-kynurenine catabolic process [GO:0097053]; quinolinate biosynthetic process [GO:0019805]; tryptophan catabolic process to kynurenine [GO:0019441]	cytoplasm [GO:0005737]	3-hydroxykynureninase activity [GO:0061981]; kynureninase activity [GO:0030429]; pyridoxal phosphate binding [GO:0030170]
J9VNP9	WT:uggt	TRUE	0.1	0.215291	25.5953	19.6178	-5.9775	0	0.0158706	CNAG_03819		Sterol 24-C-methyltransferase	ergosterol biosynthetic process [GO:0006696]; methylation [GO:0032259]	endoplasmic reticulum [GO:0005783]	sterol 24-C-methyltransferase activity [GO:0003838]
J9VPD8	WT:uggt	TRUE	0.1	0.0726678	28.4871	25.4567	-3.03045	0	0.12239	CNAG_05179	QCR2	Cytochrome b-c1 complex subunit 2, mitochondrial	mitochondrial electron transport, ubiquinol to cytochrome c [GO:0006122]	mitochondrial respiratory chain complex III [GO:0005750]	metal ion binding [GO:0046872]; ubiquinol-cytochrome-c reductase activity [GO:0008121]
J9VPP3	WT:uggt	TRUE	0.7	0.548343	14.1595	11.7529	-2.40662	0	0.188597	CNAG_05913		Alpha-glucosidase	amino acid transport [GO:0006865]; maltose catabolic process [GO:0000025]; sucrose catabolic process [GO:0005987]		alpha-amylase activity [GO:0004556]; glucan 1,4-alpha-maltotriohydrolase activity [GO:0033934]; maltose alpha-glucosidase activity [GO:0032450]; oligo-1,6-glucosidase activity [GO:0004574]; sucrose alpha-glucosidase activity [GO:0004575]
J9VT10	WT:uggt	TRUE	0.2	0.358083	20.5842	17.2769	-3.30725	0	0.101023	CNAG_01282		GRIP domain-containing protein		Golgi apparatus [GO:0005794]
J9VKZ4	WT:uggt	TRUE	0.7	0.460749	18.3495	14.6002	-3.74926	0	0.0743636	CNAG_01258		DH domain-containing protein	intracellular signal transduction [GO:0035556]	cytoplasm [GO:0005737]	guanyl-nucleotide exchange factor activity [GO:0005085]
J9VZB5	WT:uggt	TRUE	0.4	0.261313	22.6485	23.8914	1.24287	0	2.3667	CNAG_04354		Exopolyphosphatase		cytoplasm [GO:0005737]; membrane [GO:0016020]	exopolyphosphatase activity [GO:0004309]; metal ion binding [GO:0046872]
J9VJM1	WT:uggt	TRUE	0.2	0.286899	26.5357	25.3333	-1.20234	0	0.434571	CNAG_05138	SPR1	glucan 1,3-beta-glucosidase (EC 3.2.1.58) (Exo-1,3-beta-glucanase D)	glucan catabolic process [GO:0009251]	cell surface [GO:0009986]; extracellular region [GO:0005576]; plasma membrane [GO:0005886]	beta-glucosidase activity [GO:0008422]
J9VN70	WT:uggt	TRUE	0.1	0.282418	24.9688	19.3708	-5.59799	0	0.020646	CNAG_03645		NET1-associated nuclear protein 1 (U3 small nucleolar RNA-associated protein 17)	positive regulation of rRNA processing [GO:2000234]; positive regulation of transcription by RNA polymerase I [GO:0045943]; rRNA processing [GO:0006364]	nucleolus [GO:0005730]	RNA binding [GO:0003723]
J9VGI9	WT:uggt	TRUE	0.7	0.840956	23.5162	23.3801	-0.136125	0	0.90996	CNAG_04002		BAR domain-containing protein	actin cortical patch localization [GO:0051666]; actin filament organization [GO:0007015]; endocytosis [GO:0006897]; plasma membrane tubulation [GO:0097320]	actin cortical patch [GO:0030479]; mating projection tip [GO:0043332]; medial cortex [GO:0031097]; Rvs161p-Rvs167p complex [GO:1990528]	lipid binding [GO:0008289]
J9VHG6	WT:uggt	TRUE	0.2	0.122704	25.2444	15.8812	-9.36323	0	0.00151841	CNAG_00697		UDP-glucose 4-epimerase (EC 5.1.3.2)	galactose catabolic process via UDP-galactose [GO:0033499]	cytosol [GO:0005829]; membrane [GO:0016020]	UDP-glucose 4-epimerase activity [GO:0003978]
J9VRL1	WT:uggt	TRUE	0.4	0.328045	10.916	11.5515	0.635516	0	1.55349	CNAG_05718		Multidrug resistance protein fnx1		fungal-type vacuole membrane [GO:0000329]	basic amino acid transmembrane transporter activity [GO:0015174]
J9VL81	WT:uggt	TRUE	0.4	0.329732	11.1794	14.3812	3.20185	0	9.20137	CNAG_00888		Calcineurin subunit B (Calcineurin regulatory subunit) (Protein phosphatase 2B regulatory subunit)	calcineurin-mediated signaling [GO:0097720]	calcineurin complex [GO:0005955]	calcium ion binding [GO:0005509]; calcium-dependent protein serine/threonine phosphatase regulator activity [GO:0008597]; phosphatase binding [GO:0019902]
J9VZV8	WT:uggt	TRUE	0.1	0.209003	24.1539	21.3499	-2.80392	0	0.143197	CNAG_04913		Syntaxin 5	endoplasmic reticulum to Golgi vesicle-mediated transport [GO:0006888]; intracellular protein transport [GO:0006886]; vesicle docking [GO:0048278]; vesicle fusion [GO:0006906]	Golgi membrane [GO:0000139]; SNARE complex [GO:0031201]	SNAP receptor activity [GO:0005484]; SNARE binding [GO:0000149]
J9VTZ8	WT:uggt	TRUE	0.1	0.101269	24.437	15.4702	-8.9668	0	0.00199859	CNAG_00919		Carboxypeptidase (EC 3.4.16.-)	proteolysis [GO:0006508]		serine-type carboxypeptidase activity [GO:0004185]
J9VXH9	WT:uggt	TRUE	0.7	0.173642	21.804	15.1854	-6.6186	0	0.0101766	CNAG_03159		Cytoplasmic protein	positive regulation of JNK cascade [GO:0046330]; protein targeting to chloroplast [GO:0045036]	cytoplasm [GO:0005737]; nucleus [GO:0005634]	chloroplast targeting sequence binding [GO:0030941]
J9VMN6	WT:uggt	TRUE	0.1	0.095526	12.1513	11.221	-0.930304	0	0.524748	CNAG_01431		Homeobox domain-containing protein		nucleus [GO:0005634]	DNA binding [GO:0003677]; DNA-binding transcription factor activity, RNA polymerase II-specific [GO:0000981]
J9VW13	WT:uggt	TRUE	0.1	0.0523498	29.906	27.9633	-1.94265	0	0.260139	CNAG_04609		Argonaute	regulatory ncRNA-mediated post-transcriptional gene silencing [GO:0035194]	cytoplasm [GO:0005737]	miRNA binding [GO:0035198]; RNA endonuclease activity [GO:0004521]; single-stranded RNA binding [GO:0003727]
J9VUY1	WT:uggt	TRUE	0.4	0.121607	23.744	16.1468	-7.59719	0	0.00516436	CNAG_04512		Spt20-like SEP domain-containing protein	regulation of transcription by RNA polymerase II [GO:0006357]	SAGA complex [GO:0000124]	transcription coregulator activity [GO:0003712]
J9VL99	WT:uggt	TRUE	0.7	0.439831	23.4367	19.9452	-3.49154	0	0.0889079	CNAG_01128		hydroxyacylglutathione hydrolase (EC 3.1.2.6) (Glyoxalase II)	methylglyoxal catabolic process to D-lactate via S-lactoyl-glutathione [GO:0019243]		hydroxyacylglutathione hydrolase activity [GO:0004416]; metal ion binding [GO:0046872]
J9W3C9	WT:uggt	TRUE	0.4	0.339065	11	11.4338	0.433744	0	1.35073	CNAG_06456		Pentacotripeptide-repeat region of PRORP domain-containing protein
J9VNE3	WT:uggt	TRUE	1	0.383897	26.3297	25.2327	-1.097	0	0.467486	CNAG_06690		Uncharacterized protein
J9VI38	WT:uggt	TRUE	0.1	0.186874	22.4366	17.635	-4.80155	0	0.0358583	CNAG_02590		3-hydroxyisobutyrate dehydrogenase			NAD binding [GO:0051287]; NADP binding [GO:0050661]
J9VRB1	WT:uggt	TRUE	0.1	0.00478947	26.167	25.2635	-0.903521	0	0.534581	CNAG_00988		Importin subunit beta-1	protein import into nucleus [GO:0006606]	cytoplasm [GO:0005737]; nucleus [GO:0005634]	nuclear import signal receptor activity [GO:0061608]; nuclear localization sequence binding [GO:0008139]; small GTPase binding [GO:0031267]
J9VS11	WT:uggt	TRUE	1	0.722157	23.5044	23.6498	0.145402	0	1.10604	CNAG_05882		Class E vacuolar protein-sorting machinery protein HSE1 (Class E vacuolar protein-sorting machinery protein hse1)	protein transport to vacuole involved in ubiquitin-dependent protein catabolic process via the multivesicular body sorting pathway [GO:0043328]	endosome membrane [GO:0010008]; ESCRT-0 complex [GO:0033565]	phosphatidylinositol binding [GO:0035091]; ubiquitin binding [GO:0043130]
J9VFK3	WT:uggt	TRUE	0.7	0.5826	25.347	25.8634	0.516452	0	1.43043	CNAG_03629		NADH dehydrogenase (Quinone), G subunit	ATP synthesis coupled electron transport [GO:0042773]	membrane [GO:0016020]	4 iron, 4 sulfur cluster binding [GO:0051539]; NADH dehydrogenase (ubiquinone) activity [GO:0008137]
J9VSB8	WT:uggt	TRUE	0.4	0.339236	22.6558	18.7231	-3.93272	0	0.0654837	CNAG_04438		Mini-chromosome maintenance complex-binding protein	DNA-templated DNA replication [GO:0006261]	nucleus [GO:0005634]	chromatin binding [GO:0003682]
J9VE51	WT:uggt	TRUE	0.1	0.0452797	21.6926	22.267	0.57447	0	1.48913	CNAG_00172		Kinesin	microtubule depolymerization [GO:0007019]; microtubule-based movement [GO:0007018]; mitotic sister chromatid segregation [GO:0000070]	kinesin complex [GO:0005871]; mitotic spindle astral microtubule [GO:0061673]; mitotic spindle midzone [GO:1990023]; nucleus [GO:0005634]	ATP binding [GO:0005524]; ATP hydrolysis activity [GO:0016887]; microtubule binding [GO:0008017]; plus-end-directed microtubule motor activity [GO:0008574]
J9VV11	WT:uggt	TRUE	0.7	0.953441	23.8034	23.7584	-0.0450021	0	0.969288	CNAG_01902		General transcriptional repressor	heart development [GO:0007507]; negative regulation of transcription by RNA polymerase II [GO:0000122]	MLL3/4 complex [GO:0044666]; transcription repressor complex [GO:0017053]	chromatin DNA binding [GO:0031490]; histone H3K27me2/H3K27me3 demethylase activity [GO:0071558]; RNA polymerase II cis-regulatory region sequence-specific DNA binding [GO:0000978]
J9W0V8	WT:uggt	TRUE	0.1	0.0508571	25.387	23.8431	-1.54392	0	0.342952	CNAG_06361		26S proteasome regulatory subunit N6	ubiquitin-dependent protein catabolic process [GO:0006511]	proteasome regulatory particle, lid subcomplex [GO:0008541]	structural molecule activity [GO:0005198]
J9VX64	WT:uggt	TRUE	1	0.929348	11.4805	11.4103	-0.0702083	0	0.9525	CNAG_04495		Uncharacterized protein
J9VIM0	WT:uggt	TRUE	0.1	0.289394	11.4368	15.3634	3.92661	0	15.2065	CNAG_05032		Uncharacterized protein
J9VYK4	WT:uggt	TRUE	1	0.402006	28.1756	27.6018	-0.573855	0	0.671819	CNAG_03588		Alpha-aminoadipate reductase (EC 1.2.1.31) (EC 1.2.1.95) (L-aminoadipate-semialdehyde dehydrogenase)	lysine biosynthetic process via aminoadipic acid [GO:0019878]		L-aminoadipate-semialdehyde dehydrogenase activity [GO:0004043]
J9VJ41	WT:uggt	TRUE	0.1	0.0673888	21.8099	14.3026	-7.5073	0	0.00549638	CNAG_05187		Gfd2/YDR514C-like C-terminal domain-containing protein		nucleus [GO:0005634]
J9VFR3	WT:uggt	TRUE	0.7	0.216377	23.953	18.817	-5.13605	0	0.0284378	CNAG_03702		Tubulin-folding cofactor B	cytoplasmic microtubule organization [GO:0031122]; establishment of mitotic spindle orientation [GO:0000132]; nuclear migration involved in conjugation with cellular fusion [GO:0000743]	cell tip [GO:0051286]; cytoplasm [GO:0005737]; kinetochore [GO:0000776]; microtubule associated complex [GO:0005875]; microtubule plus-end [GO:0035371]; nucleus [GO:0005634]; spindle pole [GO:0000922]; spindle pole body [GO:0005816]	microtubule plus-end binding [GO:0051010]
J9VSZ0	WT:uggt	TRUE	0.7	0.952558	14.2334	13.9643	-0.269127	0	0.829822	CNAG_03291		PDZ GRASP-type domain-containing protein	Golgi organization [GO:0007030]	Golgi apparatus [GO:0005794]
[truncated: 1,685 more rows]

## Sheet: Secretome
Table S5. List of proteins identified in the whole-cell lysate (WLC) proteome and secretome analysis in the wild type (WT) and ugg1Δ strains
[truncated: 2,113 more rows]
